# Supplementary material for: iSS-PseDNC: Identifying Splicing Sites Using Pseudo Dinucleotide Composition
Source: Hindawi journal article supplement (doi:10.1155/2014/623149), 2014-01-01
Supplement: f1 [file 623149.f1.zip]

**Supporting Information S1. The benchmark dataset for splice donor sites.** It consists of a positive dataset  $\mathbf{S}_1^+$  and a negative dataset  $\mathbf{S}_1^-$ . The former contains 2,796 true splice donor site containing sequences, while the latter contains 2,800 false splice donor site containing sequences.

$\mathbf{S}_1^+$ : 2,796 true splice donor site containing sequences

>1

CTCCTCTTTGCCTTACTCCTAGCCATGGAGCTCCCATTTGGTGGCAGCCAGTGCCACCAT  
GCGCGCTCAGTGTAAGTATCATTCCCTCTCACTGTCCTGGAGAGGACGAGAATTCCAC  
CTGGGGTGCTGGGGGTCCTGGG

>2

AATGACTTCAACTGTCCCAACATTAGAGTATGTCCGTATCATATTAGGCGCTGTATGACA  
ATCTCCATTCGTAAGTACCTCTTGGTCATTTGGACACATTGTAGATTAGTCCCCTACCTG  
GGTAGTTTCTGGGGGCCAGGG

>3

TGACCAGGAAGTGGCGGGTGGGCGCCCTGCAGAGGCTGCTGCAGTTTGGGATCGTGG  
TCTATGTGGTAGGGTAAGAGAGAAGAGCTTTTGGCCAGGCTGGAGGGGCAAGGGAAG  
AGGTGGGGGGTGGGGCTTGGTCCTGC

>4

TTCCGTCCTCAGATCAAGGAGCTTGGAAACCGGCTGTGGGATGTGGCCGACTTCGTG  
AAGCCACCTCAGGTGGGGGCCCTGATGTTGCTGACGGGGGCGCAAGTCCTTTCCCCAC  
TGACAGCCTGAACACCCGCCATGC

>5

AGAGAACGTGTTCTTCTTGGTGACCAACTTCCTTGTGACGCCAGCCCAAGTTCAGGGC  
AGATGCCAGAGGTGAGTTTACCCAGGATCCTCCCAGCGGGTCCCTTGTTCCTCCATCA  
GCCCCAGGTGGCCACCCGTGTTT

>6

TCCGTCCCCTGGCTAACTGCTGGGTGACGAGGACTGCCCCGAAGGGGAGGGAGGC  
ACACACAGCCACGGTAACTGTGGGCTCTGTCTTCCAGTGCCCCAGCAGGGTGGGGG  
CCGGGCTGGGATCCTGGGTGGCTCCT

>7

TGTTCAATGGGACCCACAGGACCTGTGAGATCTGGAGTTGGTGCCCCGTGGAGAGTG  
GCGTTGTGCCCTCGTAAGTGTCCCCACAATCCCCTACCCCAACTGGCGCAGGGCCCCA  
GGCCTGGCAGAGGCTGTACCTCCC

>8

TGGCCCAGGCCCAGAACTTCACACTGTTTCATCAAAAACACAGTCACCTTCAGCAAGTT  
CAACTTCTCTAAGTAAGCAGAGTGGGTCTCATCTGCCCCAAGACCCTCCTTGTCCCCTA  
CCTCATCTGACCTTTCCCACTCC

>9

CTGTCCCGTGTTCCGCATTGGGGACCTCGTGGCCAAGGCTGGAGGGACCTTCGAGGAC  
CTGGCGTTGCTGGTGGGTCCCAAGTTGGGGGCAGGGTTCCTAGAGGGCTCTGGGAGA  
GGGTCCCGGGCCCCACCCACCGGTGG

>10

TGGACACCGGGGACTCTGGCTGCTGGCCTCACTACTCCTTCCAGCTGCAGGAGAAGA

GCTACAAC TTCAGGTGAGGCCCCACAGCTCCCAGTGCCCAGATGCTGGGCCCATCGCC  
CTCTCCCTGTGGCGGCCAGGACAGA

>11

ACCGGGTGTGGAGGCCCGCACCCCTGCTCAAGCTCTATGGAATCCGCTTCGACATCCTC  
GTCACCGGGCAGGTAGGCACAGGTAGGGGTCAGGCCGGGGATGGGATGGGGCAGGCA  
GACAGGGCTGGAGGAGGCATGAGGC

>12

TTTCTGTGACCTGCTACTGCTGTATGTGGATAGAGAAGCCCATTTCTACTGGAGGACAA  
AGTATGAGGAGGTGAGCTGAGGTCGCTCTGCTTGGACCCTGGGTTCTGCCACACTTAG  
GAAGATGTTGGCTGGATCCCTGA

>13

GCCTCCTGTCGGACCCGGTTTCGCCGGCGCGCGCTCGCCCGCCTAGTGCTGCGCCTCAA  
CGCGCCGTTGTGGTGAGGACAGGGCCCCGGGGAGGCGGGGACCCGAGGGCCCTGGGC  
TCGCGCCGGCGGCCCCCATGCGCGGTC

>14

AGCAGTTTGCGGGCGGAGACCGTGCCCGGGCTTTTGCCCGGGACTTCGCCGCCACC  
GCAAGAAGTCGGGGTGAGCGGCAGAGCAGGGCGTATGGGGCGAGCAGTGGTGGCTA  
AGGCCGGGGAGCTCTGCTCAGAGGCTC

>15

AGGGCTGGAGGTCTACACGCAGAGTTTCTCCCGGAAACTGCCCTTCCCAGATGAGACC  
CACGAGCGCTATGTACTGGGGGAGTGGGGTGTGCCTGGGCCAGAAAGCACCTTGGA  
GGGAGGGGTCTGGGCTGGGTATCAC

>16

CCCTGTGGCTCTGACTCTACCAACAGCCAGGCTGTGGGGCTGCTGCTGGCACTGGCTG  
CCCCTTCCGGGGTGAGTCTCAGGGCTGCTGGCCGTGGAGGGGTTTGGTCAGTGCCCC  
AGACCCTGCTGATCCTGCTTCTGG

>17

CTGGTAACAGAACATGACCTTCTGGGCACTGAGGCTTGGCTTGAAGCCTACCACGATG  
TCAATGTCACTGGTAGGTTCTCTTGTCTGCCTGCCCTGGTCCCCCTCTCAGGGTCACT  
GTCCTCACCACGTCCTCCATTAG

>18

CCTTGACCTGCTCAATCTCTTCCAGACCTTCTGCCAGAAAGGGGGCCTGTTGTGCACG  
CTTCAGGGCAAGGTGGGGCTGCCTGCCTGCCTGAGGGCTGAAGGGCACAGGGTCTGT  
GGGAGGGGCTGTCTCATCCTGTCCT

>19

TGGAGGCCCTAACCCTGCGTGGCATCAATAGCTTCCGCCAGTACAAGTATGACCTGGT  
GGCAGTGGGCAAGTAAGTAGTCTCTGGTCCCCCTTTCCATGCCCAGGATGGGGTCTA  
GCTGGAGCGGAGTGGGGGATGGCC

>20

TGAGGCTGGAATGGGCCTTGAGGAGCCCCGGGGGTGCCCTGGCCCCAGTGTAACCCCT  
CCCCCATCACAGGTGATGGCACCCCTTCTGTTGTTGGAATGGGCTTCTGGGGTCTGAC  
TGGTGTTTAGTGTTGCAACTTAG

>21

CTGAGGCTGTGGTGCTGACACTGCTGGCGATTTATGCAGCTGGCCTGGCCCTGCCCCA

CAATACCCACCGGTAAGAGGCTGGGCTGGTTGTTGGGGGCAGGGGTAGAGGTCCCCT  
GGACATGCAGACAGCTTGTGGGTTG

>22

TCTCACTGGGCTTCCTGCTGGCCACCACCATGGTGCCCACTGCTGCGCTTGCCAAGCC  
TCATGGGCCCCGGTATGTATGGATCAGCCCCACTTCCCCCAATGCCTGTGCCCTCATCA  
CAGACCGCACCCCTCATTCAGTAG

>23

TTCGCTTTGACCCAAAGAACATCAAGGAGAGGTCACCTCTGGCTTTTATTCCCTTCTCA  
GCAGGGCCCAGGTAAGGGCGGCCTGTGTTTGAGGCGGGGACGGGGAGATAGGTGCAG  
GGGTCTGGGCATGACAGTGGGGAA

>24

GCCGTCATGGCGCCCCGAACCCTCGTCCTGCTACTCTCGGGGGCCCTGGCCCTGACCC  
AGACCTGGGCGGGTGAGTGCGGGGTCGGGAGGGAAACGGCCTCTGTGGGGAGAAGC  
AAGGGGCCCCGGCGGGGGGCGCAG

>25

AAGGCCCACTCACAGACTGACCGAGCGAACCTGGGGACCCTGCGCGGCTACTACAAC  
CAGAGCGAGGACGGTGAGTGACCCCGGCCCGGGGCGCAGGTCACGACCCCTCATCCC  
CCACGGACGGGCCAGGTGCCCCACAG

>26

CTGGAGGGCCGGTGCGTGAGTGGCTCCGCAGATACCTGGAGAACGGGAAGGAGACG  
CTGCAGCGCACGGGTACCAGGGGCCACGGGGCGCCTCCCTGATCGCCTGTAGATCTCC  
CGGGCTGGCCTCCCACAAGGAGGGG

>27

GGACAGGAGCAGAGATACACCTGCCATGTGCAGCATGAGGGTCTGCCCAAGCCCCCTC  
ACCCTGAGATGGGGTAAGGAGGGAGACGGGGGTGTCATGTCTTTTAGGGAAAGCAGG  
AGCCTCTCTGACCTTTAGCAGGGTCA

>28

CTGGTTCTCTTTGGAGCTGTGATCGCTGGAGCTGTGGTCGCTGCTGTGATGTGGAGGA  
GGAAGAGCTCAGGTGGGGAAGGGATGAAGGGTGGGTCTGAGATTTCTTGTCTCACTG  
AGGGTTCCAAGACCCAGGTAGAAGT

>29

CAATAAAAGGCGACGGGATGGCTACCTTTTCCAATTGCTGCGGATTGCTGATGCCCACT  
TGGACAGAGTGGTGAGGAATTGCCAATGGCAGAGCTGAGTTGGGAGATTACTCACGG  
GGGCAAATGTGACTCTACCCCTA

>30

CTGTTTCGGTCCTATCCAGGAAATACTGGAATGACTGTGAGCCACCTGATTCCAGACGTC  
CATCTGAAATAGTAAGTAAAGAGGGCACCTTCACTCTGCTCTTTTCATTCTTATTTCCA  
TCTACTCTGTTCACTCAGCCA

>31

ATAGCTACAAGACATTCCCATGAATCTCAGGACCTCAGAGTGATTGACTTTAACTGCAC  
CACAAGTTCTGGTATGGTAATCTGTAAATTGCTAATTAATTCTTGATTAATAAAATTCA  
ATCATACAGTGGTATTTGTC

>32

GAAGTACAAAGAGGAGAATGATGACTTTGCCTCTTTCAGAGTGGACCGAATCGAGAG

AGTTGCAAGAGTGGTGAGTCTCCACTAAGGTTCGGTTGGAGTCTGAAGGCCAGGCT  
CCAACCTGGCAGCAGGAAGTGAATGG

>33

AGGAACTGGTTACTTCGTGGACTTCTCTGTGCGGAACTGCCCCAGACACCATTTCCTCC  
AGACACCCCAATGTGAGTATAAGAAATGTCTGTGATCGTTGACTAGAGTCACAGAGAA  
AAAAGAAAGAGAAGAAGGAGAAGG

>34

TGATGTAGAAGCCTTGGACTTGGAAAGCCCGAAAAACCTTGTCAAACTGTGAAGTC  
TTCGACCCTCAGGTGGGTGTCTAAGCAGACTTTGTCATGGCAGTGCCAGATTAAAGTG  
ACATACGTACACAAATAGTGTGT

>35

CCCCTCTACGCCAGCTTTCTGGCCGAACCTTTCTGCAAGGGGGGGCTGTCGAGGCTA  
CACGAGCTGCAGGTAGGAAGGGACGCCTTTCCCGAGACAGAGTGCTGGGGAACTGG  
TTTTGACAGCGTCAGAAAGGACTGA

>36

AGCGCTGCAGCTTCTCGCCCTGGACGGAGCACCGCCGCTGCCGCCAGCGGGCTTGCG  
GACTGCTCACTGCGTTGAGTCTTCTCTGCCCCCAGAAGCCCAGACGCCCTGCACCGGC  
CCTCTCCTGCTGCGGGTCCCGAAAC

>37

GGACGTGGCACGGGGCCGCCCGCCCTGGTTCGGGACGTGGCGGGGGAATTTTACAAG  
TTCGACTGGAAGGTGAGTCCCAGGACAGAGCTGGGCAGGCGTCGGGGGCGCCCTAC  
CAGAGCCTCCCGGAACCCTGACGGCG

>38

TGGCTGCGCCACCTTGTGCCTGGGCCCTGGGGCCGCCTCTGCCGAGACTGGGACCAGA  
TGTTTGCAATTTGGTAAGGCACAGGTTCGAGGTGGAAATGGGGGAATGTAAAGCTGTCCA  
GGGGTAGCGAGGTATTCACGTGCC

>39

CCGGGAAGAGTTGCCTGCCCAGTCCATCCTGGGAAATGTGACAGAGTTGCTATTGGCG  
GGAGTGGACACGGTGAGGTTCTCCCTCCGTGCTGTGAGCCGGTTCCAGGGCTTAGCCT  
CCGCAGACTCCGGCTCCATTTTC

>40

GTGCCTACCCCTCAGCCACTGTTCTGTCCCAGCTGCCCCTGCTGAAGGCGGTGGTCAA  
GGAAGTGCTAAGGTGAGGGGAAGGAGAGGAGGAACAAGAGGAAATGCCAAGGAA  
GGGCTGGGGAAGCAACTAGTGGATGGA

>41

TGTGGTACCTGGAAATTCTCGTGTCCCAGACAAAGACATTCATGTGGGTGACTATATTA  
TCCCCAAAAATGTGAGTAAAGCCTATGCACCCTTTCTACTGAGCCATTCCTCACTATCTT  
GGGCCCCAACCTGTTCTCAA

>42

TGGCTTTGGCAAGCGCAGCTGTATGGGGAGACGCCTGGCAGAGCTTGAATTGCAAATG  
GCTTTGGCCCAGGTGAGTGCTCTAGATTTTATACCTTCCCCAGACTGGAGAGACCCTAA  
CCCTCTAAAGTTGTGAGCTCTTT

>43

GACTTACGGAAAATTGGAAGCTGTGCAGTATAAACTCAAGTTGTTGCTGGAACAAAT

TACTACATTAAGGTTAGAGTTCAGCACCTACTTTAGCGCCAAAAGATGTATTTCTCATTT  
TATGTAAAATATTCCTGATTT

>44

CCAACAGCTCTGGCACCATCGAGCTCGTGAAGAAGGGCTGCTGGCTAGATGACTTCAA  
CTGCTACGATAGGTACCCCAAGACTTGCCCTCCTTTCTCTTGGACCCACCTGCGCTTAT  
ACTGCCCACTGGGCCATTTGGG

>45

TTCTGCTGCTGTGAAGGCAACTTCTGCAACGAGCGCTTCACTCATTTGCCAGAGGCTG  
GGGGCCCGGAAGGTAAGGGGGCAGTGTGGAAGTGGGGCCTTGAGTCAGCCGACCTG  
GGCTTCTTTGGCTTGGAGCGCTTGGC

>46

CATCGTCCTGCTGGCCTTTTGGATGTACCGGCATCGCAAGCCCCCTACGGTCATGTGG  
ACATCCATGAGGTGAGACAGTGTGGCTTGGGGCAGGGCAGGATAGAGGTGGGGAGG  
ACAGGCCAGACCTTTTAAACCCTT

>47

GCGCTTTGGCTGTGTCTGGAAGGCCAGCTCATGAATGACTTTGTAGCTGTCAAGATCT  
TCCCACTCCAGGTGAGTGTTTGAGGGGCTCCATCCAGGTCCTCTGCCTCCACTGTAGCT  
TGAAGTGGAGGCTCTCCTGACC

>48

CATTGCTGCCGAGAAGCGAGGCTCCAACCTCGAAGTAGAGCTGTGGCTCATCACGGCC  
TTCCATGACAAGGTGAGCCACACCCATCAGAATGGACTCTGAGAGGAGATGGAATGTC  
CCCTGGGTGGCTCTCCATAATATG

>49

GCCTCTCATACCTGCATGAGGATGTGCCCTGGTGCCGTGGCGAGGGCCACAAGCCGTC  
TATTGCCACAGGTACCTGGGTCAGCAGGTGCCTTTCCTGCACTTGACCTGGAGCTGT  
GGGAAGGGTTGGTGGGCGAGAGCA

>50

CGTGCTGGCTGACTTTGGCTTGGCTGTTTCGATTTGAGCCAGGGAAACCTCCAGGGGAC  
ACCCACGGACAGGTAACAGGCCTCACAGGGCAGGAAGAGAGGGACAGACCCAGGGT  
AGATACTTTGCCCTTTTGTGCTCAG

>51

CTGCGCATTGACATGTATGCCATGGGGTTGGTGCTGTGGGAGCTTGTGTCTCGCTGCAA  
GGCTGCAGACGGTAAGTAGGATGGCAGCCCTGGGCATCCTAGATTGAGTGATAGGGAG  
CAGTGGGACCTTAGAGTGATCCT

>52

GGAGCTGCAGGAGGTGGTGGTGCACAAGAAGATGAGGCCACCATTAAAGATCACTG  
GTTGAAACACCCGGTAAGGGGCCTGGTTCAGGCAACTTTGCAGGGGGGTGGAGAAGG  
GAAAACCCTTCATGTGTAGCAGGTAA

>53

CGCTACCTTGAGATAGAGTTCTGCTTGAAACATAGGAGCTGCCCTCCTGGATTTGGAGT  
GGTGCAAGCTGGTACGTGTCAATGTGCAGCAAAATTAATTAGGATCATGCAAAGTCAG  
ATAGTTGTGACAGTTTAGGAGAA

>54

CAGAAAGGAAATGCAACACACGACAACATATGTTCCGGAAACAGTGAATCAACTCAA

AAATGTGGAATAGGTAATTACATTCCAAAATACGTCTTTGTACGATTTTGTAGTATCATC  
TCTCTCTCTGAGTTGAACACAAG

>55

ACTTTCCAGCTGCTGAAGTTATGGAAACATCAAAACAAAGACCAAGATATAGTCAAGA  
AGATCATCCAAGGTATGATAATCTAAAATAAAAAGATCAATCAGAAATCAAAGACACCT  
ATTTATCATAAACCAGGAACAAG

>56

TAGGAATTTCTGATTCATTTAAAGGATTTACAAATTCATCAACCCCTGAAAACCTAAAGC  
AAATTGAACAGGTATGATAATAAAATAATTTTCAATTTTTTTAAGAATGTATTCCTACTGT  
TAAAATTATAAAAGTATATT

>57

AAATTGAAGCAAGCATTCTATATTCCAAGAAATTTGGAACACCTATACCTACAAAATAA  
TGAAATAGAAAGTATGTAGACTTTTATTGTGTTTTGAAGAGAGAAAGAATGGAATCCTG  
ATCTTTTAAAGAAAAAAATATT

>58

ATCATGAAGGGCCTTGCAGCTGCCCTCCTTGTCTCGTCTGCACCATGGCCCTCTGCTC  
CTGTGCACAAGGTGAGTCTGTCATCCATGTGCTTTGATGGCTCCCTGGGCAGAAGTCA  
GGCGACATCTTCCAAGTGCTGTG

>59

GGCAGATTCCACAAAAGTTCATAGTTGACTATTCTGAAACCAGCCCCAGTGCCCCAA  
GCCAGGTGTATGTAAGTGCCAGTGCTCCTGCCACCCCTCGGGAGGGAGGATGGGA  
GGTTTGGGGTGAGGTCCCCTCAGAG

>60

TTCAGCGTGAGAAGCAGGCCAGGCCTGGGTCTGGAGCCGTCCTGGCCTTCCCAGATG  
ACAAGGACCTCAGGTCAGCTTCAGCGTGAGAAGCAGGCCAGGCCTGGGTCTGGAGCC  
GGGTGATGTGCACATGGGGCTCACTT

>61

ATGGTCCAGCAGAGTCTCAGAGCGCGGTCTTTGGAGATGTGTGCCCCCTACTCACTTC  
TCTCTTGGATGGGTGAGTTAAAATATTTTAAAGGCCAGTCATCATAGTTACATTTGAATAT  
AAAGAAGCTTCACTGTGCTGT

>62

GCCCTGTTCTGCCGCTTGACCCACAGAGTGACTTAGGAATTATCCCTAGAGTGGCTGA  
GGAGCTCTTCAGGTACTGCCGATGGTGATGAGTGGGGCAGAGAAATATGGCAGGGAA  
GCCAGGCGGTCAGCACCTTGTTAT

>63

TGTCGGGGGTCAAGCGTGAGGTGGTGACAGCCAAGGATGGACGGACAGAGGTTGCGC  
TGCTGGCCTCTGAGTGAGTACTGCACCTGCCCCGTGCTGCTGGCCTCTGAGTGAGAAT  
GGCACCTGCCCCCTCCACCTGGTCA

>64

GCGGATTCCTCCAGGTCTCACCTGATAATTACGGTGACTCTAACCACAGCCTCCTGCTC  
TGACAGCACTGGTAAGTCACCATTTGTGCTTGGTCAGTGGCAAGTAATAGAAAAACCC  
ACTTAAGAAGAAAAAAATCAGGC

>65

CCCGCAGGGCATGCGGAGCAGGTGCAGGCTCGACTACAGCTCGTGGACTCGGCCGGC

AGCGAGTGCGTTGGTGAGCAGGGGCAGGCATTTCCCTGGGGGGTGGGTGCTGCAGAA  
GCCTATGATCTGATGGAGCTGGATGT

>66

CCGGACCCCTTTGTGCGGCCGGAGGCGGCGGGGAACGGCCATGGCGGCCAACATG  
TACCGGGTGGGAGGTGAGTACCGGGCGCAGGGATACGGGGCCCGGGGCGGGAGAGGT  
TGGGGTAGGGACCTGAGGGGCTCGGC

>67

AAGGTTGTCTGTCTTTTCCGGCGCAGGGACATTTCTAGTAGCCTCAACAGCCTGGCTGA  
TAGTAATGCCAGTGAGTATCTTCCTCCCTTTCTTTTTCTCCTACCCATGATCTGAGGCCT  
GGGCATGTCCCTGCAGGTATT

>68

GCCATCAACTGAAGCACCGGGAACTTTTCTTTCTCGGCAATTTGAATCATTACCAGCC  
ACCCACATACGGTACAGGACAAC TGGGGCCAGCATAGCCTGCGTGCATTACGTAGAA  
GATGGAGAGAAGGAGGTGGTATT

>69

CTCGCTGATCAGGGCGAGATTAGAGTTGGTTGCAAATACCAAGCTGAGATCCCAGATC  
GCCTAGTAGAGGGTAAGCAACAGGACAAGACTGTACGGCTACCAGGTTGTCTAATTCC  
AAGGGGCACTTTAACATTATAGTC

>70

AGATGAAGGTCTGGGACCCAGACAACCCTCTCACAGACCGGCAGATCGACCAGTTTC  
TTGTGGTGGCCCGGTGAGGGGTGGGTGGATAGGGAAGATGGGCTGGGGGAGGTGTGG  
ACATTGTTCTGAGTCCCATGGTTCTT

>71

TTGTAGCAGCTCCATTCGGCAGCCAAGCTTGACATGAGTGCAGCTGCTGCCTCCCGA  
GATATCACTCTGGTGAGCAGAAGTTGGTGGGTAGTTGGGCAGGCTGGGTTTTCTGGGG  
ACTTGCAGAGCCTGGGAACAGAAG

>72

AGAGGCCATGCTATTTGAGGAGGCCCTAGAGAAGTATGGGAAGGACTTCAATGATATT  
CGCCAGGATTTTGTAAGTGGATGGCACTAGGAGGAGAAGTGGGAGAGATGACAGGTG  
AGGGAACCAGGACCTGGGGCCAGAT

>73

CTGGAAGTCACTTGCCAGCATAGTCCAGTTTTATTACATGTGGAAAACACAGACCGGT  
ATATTCAGCAGGTATTATCTGGGCTGGGGAGGGTGGACCATAGGCTACCTGCTGACCTC  
TGCCTTTGAAGTTGATGACATT

>74

TCTGTGGGTTCAAAACCTGGCATGAATGGGGCTGGATTTCAGAAGGGCCTGACTTGTG  
AGAGTTGCCACAGTGAGTTACGGGGGCACTGGGATGGTGGGGATGGGTGGAAGGCCT  
GCTGTGGCTCAAGAATCTGAGGGGC

>75

GATCTACTGGAAGAAGTATGGGGGACTGAAGACCCCAACTCAGCTTGAGGGGGCCAC  
TCGGGGCACACGGTAAGGATCAGTGGGAAGAAAAGCAGGGGAGAGCAGTAAGCATA  
TTGATGGTGAGCTTAGGTGAAGCCA

>76

CTATTACAGCCAAGGAGGGCCGCCCGACGGCCTTATGCTCCTATCAATGCCAATGCCAT

CAAAGCAGAGTGTAAGGGCAGGGAGTGGTGGGACTGGTGGTGGGTTTCGGATTGCTC  
TGCCCAGAGACCGTTGTTTCTCTG

>77

GCCGCCAAGACTCCATTGAAGATTCACCCTCTGGTGCGGCTGCCCCTGGCAACTATCG  
TCAAAGATCTGGGTATGGGATGGGGACCAGTGAGGTTGGCATCAGGCTCCCAGTCCTT  
TCCCTGTCTGACATCTCTCCCCTT

>78

GATCAACAGAAACCAGCTGTCCCAGAACCAGGGGACTGGGGGGCATTATGGTGAAACG  
GGCCTATGAGACTGTGAGTTGACAGAAAGGGGTGGGCCAGATTGAGTTGGGTGGGCT  
TTTGTCTCTCATAGGAGTCTGAGAGG

>79

CCAAGCGTCAGAACTAAACCCAGCTGATGCCCCAATCCTGTGGTGTGTTGTGGCCAC  
AAAGGATACCAGGTAAGGCGTCTACCATGGGAGGGGCTGAGAGGGACAGTCCAGGCT  
GGTGAGTGTGGGGAGTAGGAGTATC

>80

GATTGAAAATGATCAGTCGATCAGCCGAAATCATGCTGTGTAACTGCTAACTTTTCTG  
TAACCAACCTGGTATGTTACTAATTTTATTTCACTAGTTTCCAGTAAGGGGGTTGAAATC  
ACAAAATATTCTCTTGGTTTG

>81

AGAATGGCTTTTCCCGAACTTTGAAGTCGGGGGATGGTATTACTTTTGGAGTGTGTTGGA  
AGTAAATTCAGGTAAGACATTTTAAAATTGATTTTAAAATGGACAGCTTTGTTTCAGCC  
AAATCCTAAAGGAAAATGATAT

>82

ATTTACTGTAAACAATTGGACAGAAGAATGCACTCACCTTGTCATGGTATCAGTGAAAG  
TTACCATTAAAGTAGGTTGAATGTCTTGTCTTATGTTAAAAATAAGTTATTTGAATTTAA  
GCTTACCCACTATACACAGA

>83

TAAAGCCAGAATATTTTACTGAATTCCTGAAAGCAGTTGAGTCCAAGAAGCAGCCTCC  
ACAAATTGAAAGGTATATTATGTATTTTAAATATAACAAGATGTCACCTTATATGATAGCAT  
TGATTTTATTTAAGTTAATT

>84

TCTGTCAGGACGGCAGGAAAGAAAACAAATCTTCAAAGGGAAAACATTTATATTTTTG  
AATGCCAAACAGGTAATTATGTTATAAGCTAAATTTTCCTAAAGAATACATTACAACTA  
GGATACATTATTAACCTTATC

>85

CAAACCTCACAGACCTTAATTCCTGACTGTCAGAAGAAATGGATTCAGTCAATAATGGAT  
ATGCTCCAAAGGTATAGAATTATTCTTTATTAGTAAAAAACTGCAAGTAGGAGATTTTAT  
GTTTAACCTTTTTTTGTTGCTT

>86

GAAATTGGATTGGCGGTGATTTTCATGACTACAAAGAATTACTGTGATCCTCAGGGCCA  
TCCCAGTACAGGTAATTGAAGCATTATTTTATTGATTTCGTTAGCAACTTTATTATGTAAAT  
CGATAAGCTAAATATACGTT

>87

TAATGCCAAGCGCCCCAGTGAACACTACAACATACGTAGCTGACACAGAATCAGAGCA



AGCAGATACATGGTAAAGCTTCTTCATTACCGTACTATTGTTATTATTCTATCAATAAATT  
AATAGTATATTCAGGAAGTAA

>88

AAGATAGGGCTTCTCAGCAGCAGCAGACCAACTCCATCAGAACTACTTTTCAGCCGTC  
TACCAAAAAAAGGTCTGTTTTTGATAACTTCTCTCATGTCTCTGAAAAAAAATGAAA  
GTTTTTTATACTGTTGTAGAATGG

>89

GCCAAGGATGGATATAGAAACAAATGACACTTTTCAGTGATGAAGCAGTACCAGAAAGT  
AGCAAAATATCTGTAAGTAACATTTTAAATGAGAGGTATAGTACATAGAAGCTTAGAAT  
GCTAACAGGTACTTTTCGATTTTG

>90

TACTTCCAGAAATCCATCTGGCATAAATGATGATTATGGTCAACTAAAAAATTTCAAGA  
AATTCAAAAAGGTAGGTATTTCAACTGTATCACAAGAGGTCAGTGTTTGAAATGTTTTT  
AGAGATACCAGTGATGCTAAAC

>91

ATCAGATCTAATAGCTCATCATGCTCGAAAGAATACAGAACTAGAAGAGTGGCTAAGG  
CAGGAAATGGAGGTTAGTAGGAAGTGAGGCCAGAACTTGCTTAAATTGCACTTTGG  
TCCATTATGGTGGCCTTCAAGCAA

>92

CCGGAGGACGAGTCGACCCCGGAAAAGAGGACTGAGAAAATCTTCCGCCAAATGGAC  
ACAAACAACGACGGTGAGGGGCAGGGGCGGGACGGGGTGGACGGGGCGGGCGCCTT  
TCCCTCCCTCCCTCCCTGCCTCCCTT

>93

GGCGCTGGCTCCCGGAATATGGAGCCCTGGGCGCGGGGGCGGCGTGTCAGGTGGTTG  
CGGAGCTGGTAAGGTGAGGGGAAGGCAAGGTCAGGGGTCACGGCATTCCGCTCGCTG  
GCAGGGAGGGGCGCGGGGCGGCTCGA

>94

TCATATTCTAAGAACTCAGCCACTCAGGTATCCACCATGGTGCTGGGTCCTGAACAGAA  
GATGTCAGATGGTAATTTACCACCTTTGTGTTATTGTCTAATTTATTTGTAATTAGGTTTAT  
GTTGGTAACAGAAATTTAT

>95

GTCCCCTGGGGACTCAGAGGAGTACTTCGCCACTTACTTTAATGAGAAGATCTCCATTC  
CTGAGGAGGAGGTTAGTATCAGGTCCTTGAGGAGAACACTATTGTCTGGGGAAAACC  
TGTGAGTGAAAGATCTGCTGGAT

>96

GAGCATTGCCTACCTGGATCCAGGAAATATTGAATCCGATTTGCAGTCTGGAGCAGTGG  
CTGGATTTAAGGTGAACATCTAGTCCTACCCCTGTCTTTTAAGCACATAATACCCTCTC  
ACATCCTTTTCTCCACCCTGC

>97

GCTTGCAGCTAGACTGGGAGTGTTACTGGGCTGCATCTTGCTGAAGTATGTCACCGTC  
AGTATCCCAAGGTGAGCAATGTATTGTCCTGTTTGTCTCTCACCCATGCCATAGGAATCT  
GTGTGTCTGGCGGTATGTGCT

>98

CTATCATCGGCTCAGACATGCAAGAAGTCATTGGCTCAGCCATTGCTATCAATCTTCTGT

CTGTAGGAAGGTGAGGGGTTTTCTCTAGAAAGTCATCAGTGTTTTGCTGGATTTCCAA  
GCAGAGATAAAAAACAAAACC

>99

ATTCCTCTGTGGGGTGGCGTTCTCATCACCATTGCAGATACTTTTGATTTCTCTTCTTG  
GACAAATATGGTAAGGAGAGCAGGAATGGGAGGGTCAAAGGAGCTGCTCTCTGTCAT  
GTGGCAGATGGGGAAGTCTACCT

>100

ACAGGCTGTGGGCATCGTGGGAGCTGTGCATCATGCCACACAACATGTACCTGCATTCTG  
CCTTAGTCAAGGTGAGCAAGGCCCTTATCTCCTTCACCTCCTAGACAGTTCATGGGATC  
TTTTCTTCAATTGCAAGGGAC

>101

CTTCATCATCAATGTCTTTGTTGTCTCAGTCTTTGCTGAAGCATTTTTTGGGAAAACCA  
ACGAGCAGGTGGTGAGTAAGCCAGGGTTATGGGTGGTAGTGAATGTGAGGGTAAAGT  
GAAGACTGCAATGGGATGGGGAAG

>102

TACCAGCAGTCCTCATGCTGGCCTCTTTCCTAAAGATAACTCGACACTGGCTGTGGACA  
TCTACAAAGGGGTAAGCATGTTTGGATTTGTGATCTTTGTTCTGAATCAGTATTTTTAG  
CATAGTATGTGGTCTTTTTTG

>103

AGTGGGGATCCTGGCTGCAGGACAGAGCTCCACCATGACAGGAACCTATTCTGGCCAG  
TTTGTGCATGGAGGTACGTGCTGGTATAGGATAGAGGGAGATAACACAACCCTTTTGCTA  
CTTCTTCTTCTTCTTCTTCTTTT

>104

TGCTGTCTTCCAAGATGTAGAGCATCTAACAGGGATGAATGACTTTCTGAATGTTCTAC  
AGAGCTTACAGGTGAGGAGGAAGCTGAGGAAACACATCCTAGTTATTCAGGTAGCATT  
ATGTACTGCCCTTGGGTACCAAG

>105

CCTTTGCTCTCATACCCATCCTCACATTTACGAGCTTGCGGCCAGTAATGAGTGACTTTG  
CCAATGGACTGTGAGTGTACTCCTCTTCGTTCCCAAAGGGGATGCTGATATGGGGAAA  
GGGTATCTTCATGCAGTAGGCC

>106

AGGGCATGTGGCATTATATGTGGTGGCTGCTGTGGTCAGCGTGGCTTATCTGGGCTTTG  
TGTTCTACTTGGTAAGTCTAGCCTGGAAGAGCAGGGGCATAGGTATCAGGGATGGTTG  
AGGTGGGGTTCAGTGACATTAG

>107

GGGCCGCGTATGGAGCCCCCGCCCCCGGAGCTGCCAACATTGCCAACGCCACCGCCA  
CGCTACACACAGGTGAGCTCTGGGCCTGGAGGGTGGAGGGCCCCAGTCCGTGACCCCA  
CGTATCCTTCCCGCCCCCGCGCAGA

>108

ATTCCACCCTTCCTGTACATCGTAGCGAATCAATCCGTGGCGCCGCACTCCTCCGCATC  
CCTCTTTAACAGTGAGTCTACCTGAGTTTGTATTCTGCCTCCTCCAGTCCCCCAATGCA  
TCAGTCCATGGCTTTTTTCAA

>109

ACTACGCAAGAACAAGACCAACATGAATTACGACAAGCTCAGCCGGGCCTTGCGGTA

CTACTATGACAAGGTACAGTCTCTCAGACCAGGGCTGGAACCCCCCCTGACATTTATA  
TCAGAGATTTTATTTTGTTTTAAT

>110

GGGAAGTGGCTCCGGCCTCCAGGCTCCGGGGCCGGCGCTGACCCCATCCCTGCTTCCT  
ACGCATACATTGGTGAGTGCTGCGGAGGGGTGGGGTGTGTGGGCGCCAGCACCAATG  
GGATTGGCATGTGGCGGGTGA

>111

CGCGCTGCGCGCTGGGGACCGCCTGGTCGAGGTCAACGGCGTCAACGTGGAGGGCGA  
GACGCACCACCAGGTGGGGGCCAGCGCTCGCCCCGGCCCGCCGCCCTCCCCGAG  
CGCGTCCCCCTGGGGCGAGCAGGGGT

>112

CCACGACCCCTGGGAGCCGAAGCCAGACTGGGCACACACCGGCAGCCACAGCTCCGA  
AGCTGGCAAGAAGGTATGGCGGGCTTGGCCCACAGGGACCACTAGCCTCTCCAG  
AGGCTCTCTCAGCTTTTGACGACGAT

>113

CATCCGCTCTGTGGACCCGGGCTCACCTGCCGCCCGCTCTGGCCTCCGCGCCCAGGAC  
CGGCTCATTGAGGTACCGGCCACAGGGCTGCGGGGTGCCGAGTGCCCCGCACCTGT  
CCACACTGGGGCCCTGGGTCTTG

>114

GTCGTGGACCCCGAGACAGATGAACACTTCAAGCGGCTTCGGGTCACACCCACCGAG  
GAGCACGTGGAAGGTGGGCCACGGCCCAGGGCACAGGGTGGGTGCGGTGTGGTGGC  
TGAGCAGCCACTGACACGCTGTCCCCA

>115

CCGGGAGGCCTGGCCTCCCCCAGGGCCGCCACCTCTGCTGGTTGCTCTGTGCTTTCAC  
CTTAAAGCTCTGGTAAGGAGAGTAAGGGGAGGGAAAAGAGTCACTGGAGGACAGATT  
CGTTCCCCGGCCTCCGGGCTGGGGA

>116

TTTGCCATGCTGGCTGGTGGGAAGAGTTTGTGGTAGCAGAAGAGTGCTCTCCATGCTCT  
AATTTCCGGGCTGTGAGTATCTATTTCTCTACCCTTTTTTTTTTTTAAACATCTAAGCAAA  
CACTTAAGCAACATCTTAACAT

>117

CTGAGTGTGGTCCCACAGGATATGTAGAGAAAATCACATGCAGCTCATCTAAGAGAAA  
TGAGTTCAAAGGTGAGTGCTGTTTCTCTTCTCTGAGATCACCTCCTTTGCTCCTATGA  
CTTTAGATGGATGGTCCCACCTT

>118

GGAGCAGGAGAGCTGTCTGGATGGCTGGGAGTTCAGTCAGGACGTCTACCTGTCCAC  
CATTGTGACCGAGGTGGGTGCCGGCCCCCTGCTGGGGCTGAGACCAGGGCTCGGAGGA  
CCTGTGCGGGTCCTTGAACCCGAGCT

>119

CACTCACAATCTCCTTGTTCTTCGTGGGTGTGCTGTTGGGCTCCTTCATTTAGGGCAG  
CTGTCAGACAGGTAAGGTGTCTGTCTTCTGGAGCACCAGGGGACCTCAGCACTGAGG  
AAGAAGCGTGTGCCTGGCCCTGA

>120

ATGTTTGTGCTGCTGTTTGTCTTGTAGGCATGGGCCAGATCTCCAACATATGTGGCAGC

ATTTGTCCTGGGTATGGCCATCAGGTTGGAGTTGAGTACTTGATCCTGTATTTACCATC  
ATCCCATCACCTACCTTTCTG

>121

TCATCCGAGACTGGCGGATGCTGCTGGTGGCGCTGACGATGCCGGGGGTGCTGTGCGT  
GGCACTCTGGTGGTGAGTGTGACCCTGTGCCCCATGTGCCCACTGGCAGGATGATTTC  
TGTCTGGCCTTCACTAGAGGGCAG

>122

GGTGATCATCCGCAAGGCTGCCAAAGCCAATGGGATTGTTGTGCCTTCCACTATCTTTG  
ACCCGAGTGAGGTAAGCACCATGTGGGTGTGGGTGAGAGGGACAGACTGACCGTGAT  
TTGAGAGCAGCAGCACCCAGCCCT

>123

CCCACAACATTCTGGATCTGCTTCGAACCTGGAATATCCGGATGGTCACCATCATGTCC  
ATAATGCTGTGGTATGTAAAAGAGACCTGCCTGAGGCTTCCAGACAAAGCTTCTTGAA  
GTGGCCATTGGGCCTCTTGTTTA

>124

CGCTATTCCATGGCCACTGCCCTCTTCCTGGGTGGCAGTGTCTTCTCTTCATGCAGCT  
GGTACCCCCAGGTAGGGACCATGTGCATCTATGGTTTGGGGTCTTCACTGAGTCTCTTA  
CTGTCTACCAGGCTGTCTCAAT

>125

ATGGGTGTGGGAGTCAGCTCCACAGCATCCCGCCTGGGCAGCATCCTGTCTCCCTACTT  
CGTTTACCTTGGTAAAGTCCCATGAGCCAAGGGCACACTAGAGCAACGGGATGGAAGTA  
CTAACTGGCTTGAATGTGAGCTG

>126

CCTTGTTTCTCCCAGAGAGCTTCGGTACCCCACTCCCAGACACCATTGACCAGATGCTA  
AGAGTCAAAGGGTAAGAAGACCTCCTCTGTCAGTGTGATGCACTGGGTCTGGGTCTG  
GCCAGGTCTCAGGAGCCCCTCAC

>127

CTCGGGGTCGTATGACGCACTTTTCCAGCTCGAGCCCTCACGAGGCCGTGGGTACGAC  
CGGAAGCCGCAGGTGGGTGAAGCGGAAACGTTTCAAACCGGGATGTTGCGGGCCGTA  
GCGCGTGGGCGGCCGTGGGGTCTTG

>128

GGGTTCAAGCGATTCTCCTGCCTCAGCCTCCCGAGTAGCTGAGATTACAGGCGCCCGC  
CACCACGCCCAGGTAATTTTGTATTTTGGTAGAGACGGGGTTTCACCATGTTGGCCA  
GGCTGGTCTCAAACCTCCTGACCT

>129

ATTCTGGAACCCTAACAAGATCACATTTTTGACCAAAGTCAATATCTTGGACTATAGTTA  
ATTTATCAAGGTAAATGCCACTTTGATGTGTCTTGGTTAGGAATCTTTGTTCACTTGAGG  
GAATACATGGTATATGATAG

>130

GAGTGCTTTAGGAGGCCAAGGCAGGAGGACTGCTTGAGCCCAGGAGTTTGAGACCAG  
CCTGGACAACAAAGTGAGATTCATCTCTACAAAAAAAAAAAAAAAAAAAAAAAAAATAGC  
CAGGCGTGGTGGCACATGCTGGCTAA

>131

CCCGGGCTCCCAGAGGGAAGTGCCTTCGGCAGAGTTGAATGAATGAAGAGAGACGC

GGAGAACTCCTAAGTGAGTAGATGCAGCCCATGCAGTTCGCCTTCTTTTATGCTTTTTT  
CTTCTTTTGCACGTCTCTTCTTTC

>132

GATGGGATCCGGCTCCTCCAGCTACCGGCCCAAGGCCATCTACCTGGACATCGATGGA  
CGCATTGAGAAGGTAGCCCCTCCCCACCCAGACACCCCCTCTCCCCCGGGTGACA  
GCGCCGGGGCCGGGCGCGGCGGGG

>133

TAATCTTCAGCAAGTACTGCAACTCCAGCGACATCATGGACCTGTTCTGCATCGCCACC  
GGCCTGCCTCGGTGAGTGCGCGCTGCGGGCTCTGCCCCGGTGACGCCACGCGGCCTCCT  
CGCCTTTTCGGGATGGCTGGGAG

>134

CCATCTCCCTGCTGACCACCGACGACGCCATGGTCTCCATCGACCCACCATGCCCCG  
GAATTCAGAACGGTAAGAGGCTCCGGCCGCGCTCCTCGGGGTGTGCCTGGCACTTCTC  
TCCATGACATGGGAGGCTTTCTGT

>135

AGTGGACAGGTAGAGCCCAGGCCAGAGAGCCCCAGGGCTGCTACCAGGAAGGCCA  
GCGCATCCCTCCAGGTAACGGGCAGCTCCTCGGCCACAGCCTCCACCCCCAACACGT  
GGGATTCGGGCTGCAATGGCCTACAC

>136

GCATTCAAATCAATGAACTGAAAGCTGAAGTTGCAAATCACTTGGCTGTCCTAGAGA  
AACGCGTGGAATGTGAGTGACGTTTCTGTTTCCTTTTGCTTCTCTGTCCTTTAACCTCT  
ATTCAAATTAACCACTTGGAAC

>137

TGGTGGAGATTGAGAAATGCAAGAGTGACATTAAGAAGATGAGGGAGGAGCTGGCGG  
CCAGAAGCAGCAGGTAGGGTCTGCGCTGGGGCCACGGGCGGCCGGGCCTGGGGAGG  
GCTCCCCGTACCAGTTGGGCTGGGGCT

>138

CTGTAAGTACAGTTTTTTTGATAACCACAAGAAGTTGACTCCTCGACGCGATGTTCCCA  
CTTACCCCAAGGTAAGATGAGATTCCGGCCCAGAAGAAGCTGCAGCTGTGTCCCCAGC  
CCCACGCCACGCCCTGTGGCCCT

>139

GCTCTCTCCAGAGACCATCGAGGCCCTGCGGAAGCCGACCTTTGACGTCTGGCTTTGG  
GAGCCCAATGAGGTAAGTGCGGGGCTTGACAGGCACCACGTCCCAGGGGGAGGCAGCT  
CAGGATCTTGGACGCCAGTGGGACC

>140

GCACATGTACCACGACCTCGGGCTGGTCAGGGACTTCAGCATCAACCCTGTCACCCTC  
AGGAGGTGGCTGGTGAGTGCCAAACCCGCCTTCGGTTCTTCCTGGGCACGTGGTTTCA  
TCCAGTTCCACAGGAATGGAGGGA

>141

CCACAACCTCCGGCACTGCTTCTGCGTGGCCCAGATGATGTACAGCATGGTCTGGCTCT  
GCAGTCTCCAGGTGGGTCTGCCCCTGCACACCCAGACCTCTACTCTCGGGGGTTCAG  
ACGGAGGCCCCCTTCCAGGGAGC

>142

AAACGGATATCCTGATCCTAATGACAGCGGCCATCTGCCACGATCTGGACCATCCCGGC

TACAACAACACGTATGTACAGGATTTTCTCTTTTTTTCCTTTTAAAAGGCACCCTGGCTA  
CTGGAGGGAACCTGTCAGCCC

>143

GATCCTCGCCGAGCCTGAGTGCAACATCTTCTCCAACATCCCACCTGATGGGTTCAAG  
CAGATCCGACAGGTGTGTGGGGTGAGGGCCCTCCCACCGGAGTGGGGGCACATTCAG  
GGACAGAGCAGCCCCCACTCTCCAT

>144

AGAAATTATGGATTCTTTCAAAGAGAAAATGGAGAATTTTGA CTACAGCAACGAGGAG  
CACATGACCCTGGTGAGTGGCTTATTCTGCCTGGGTGGGCAGCCAGGCGGTGGGCTGG  
CGAAGCAGGTCATCCATCCAGCTC

>145

TAACGAGGTCCGTCCAATGGAAGTCGCAGAGCCTTGGGTGGACTGTTTATTAGAGGAA  
TATTTTATGCAGGTAAGAGTCTTGCAGAGCAATCAAGCCTCCAGCCACTCTTATTAGCC  
CCACTTAGTAAGGGTTTGCGTTA

>146

GACCAAGGCCACAGCCCAGATTGGGTTCATCAAGTTTGTCTGATCCCAATGTTTGAA  
ACAGTGACCAAGGTGAGTAACTGTCACCACATGTCACACTTGCTTACACTCAGATACA  
TGCATGCACACACAGGCACACACA

>147

GCTGCAGCCACTTTGGGAATCCCGAGATCGCTACGAGGAGCTGAAGCGGATAGATGAC  
GCCATGAAAGAGGTA AAAACACACTGAGAAGAGCCTGCCTTCCTTGCGGCAAGCAGGC  
ACGCTGCCCTCCGCACTCCCGACTC

>148

ACTGACAGCTTGACGTCTGGGGCCACCGAGAAGTCCAGAGAGAGAAGCAGAGATGTG  
AAAAACAGTGAAGGTAATGCTTGCTCTGCTGAAGTGGCATCTCAGCGCATACAATGAT  
TCTGACAAAGGACAGAAGGAAAGAG

>149

ACTGGGCACCCAGTCCAGGAAAACCAACCCAAAAGGAAGCCAAGTATTAAGAAATCA  
CAAGGCAGGAAGGGTAAGACAGCATTTCGCAGCATATTTTATTTT CAGAAATGCATTTTCT  
CCTCCCAGCCTCTTAAGGATAGGG

>150

CCCGGGCTCCCAGAGGGA ACTGCACTTCGGCAGAGTTGAATGAATGAAGAGAGACGC  
GGAGAACTCCTAAGTGAGTAGATGCAGCCCATGCAGTTCGGCCCTTCTTTTATGCTTTT  
TCCTTCTTTTGCACGTCTCTTCTT

>151

TTTGTCTTCATTGAATTACGACACTGTCCACCTTTAATTTCTTCGAAAACGCCTGTAAC  
TCGGCTGAAGGTTAGTGCAACTTCATTTCTTTCCTTTACTCTCCAGAGCTCCCCAAACA  
TCAAGAAACAGGACAAGGCAA

>152

GTGTGGGGACAACGCGGCCTGCCAACACTACGGCGTGCGCACCTGTGAGGGCTGCAA  
AGGCTTCTTTAAGGTGAGCAATGGCGGGAGCGGAGTAGGCAGGTAGGGAGCCCCTAG  
TGCCCGGGACCTCGGAGTGTGCCCTC

>153

AAGCGTCGCCGGAATCGCTGTCAGTACTGCCGATTT CAGAAGTGCCTGGCTGTTGGGA

TGGTCAAAGAAGGTAGGCTGAGGGGAGCTGCCGACCCTCCAGTTTGCGCCTTTAGGA  
AACCACTGCTCATACTCCAGCATCA

>154

TCTGATCAGTGCCCTCGTCAGGGCCCATGTCGACTCCAACCCGGCTATGACCAGCCTG  
GACTATTCCAGGGTAAGAAGCTGGCGGGGGGATATCATGTGGACAAACCGACAGATG  
GGCAGGACCCCTCCCCACATCCGT

>155

CCAAAGCCGACCAAGACCTGCTTTTTGAATCAGCTTTCTTAGAACTGTTTGTCTTCGA  
TTAGCATACAGGTAATAAGGGAGGGAGGAGACAATCCAGGGAGGCTGTGAGAGAAAT  
CAAGAAAGGAAAAGAAAGGGAGGA

>156

TCCAACCTGCAGAATATGAACATCGACATTTCTGCCTTCTCCTGCATTGCTGCCCTGGCT  
ATGGTCACAGGTCAGTACTGCAGGCGCAGGGCGCTTCCCCTCCAGAACTGCCTAGCAG  
GATTTGTCCTGAGTTTCCCTTG

>157

CAGACCGCGGACGTCTGTAATCTCAGAGGCTTGTTTGCTGAGGGTGCCTGCGCAGCTG  
CGACGGCTGCTGGTGAGCGCCCCCGACCAGACCGAGGGACAGGGCGAAGGGGGACT  
GGAGGAGGGAACCCCCCTTTAGGGAC

>158

AAAATTTGACCAAAATTTGGATACAAAGTGGTACCAGTGGAAGGCAACACACAGAAG  
ATTATATGGCGCGGTTGGTAACATCTGAAACTGTCCAGAGGGACTCTGGAGAGAATGG  
TCCTCGCTGTTGGGAGTTGATAGCC

>159

CACAATGGGGAATACAGCCAAGGGAAACATGGCTTCACAATGGCCATGAATGCTTTTG  
GTGACATGGTGAGTGTGGCAAGGATTGCTGAACTCTGTGCTGCTTCTCAGTTCTTCAC  
CAAAATAGTCTTGCTTTTAACATT

>160

GATCTTCCCAAATCTGTGGATTGGAGAAAGAAAGGCTACGTGACGCCAGTGAAGAATC  
AGGTGAGACAGCGTCAGATTCAGACCCTGTCTCCACAGGAAAGCCAAGAAGGAATTG  
GTGTCATTGCTGTGGTAGATGGTGG

>161

TAGGGCCTTCCAGTATGTCAAGGAGAACGGAGGCCTGGACTCTGAGGAATCCTATCCA  
TATGTAGCAGTGGTAAATGGAGCTCCTTATCTTGTCATTTCGTGCTCTGCTTTTGGAAAGT  
GGAACACTTTCAGAGATAACAG

>162

GTCGCAACTGTGGGGCCCATCTCCGTTGCTATGGATGCAGGCCATTCGTCCTTCCAGTT  
CTACAAATCAGGTAAGTGTCAATTTTATTATAGAAATTTAGGCAGAATTGGGAAGCATCA  
CTGTGATTGATTCTTGATATG

>163

TTCTGGTGGTTGGCTACGGCTTTGAAGGAGCAAATTCGAATAACAGCAAGTATTGGCT  
CGTCAAAAACAGGTATAAACTCAAAATTGAAAAGGGAATTTTGTTCCAAATCAGTA  
TTTGATACAAGTTCACAAAAGCT

>164

GGGGGAAAGATGGTGGGGACCAAGGCCTGGGTGTTCTCCTTCCTGGTCCTGGAAGTC

ACATCTGTGTTGGGTATAGGCTAAGTATCTGCTGGCTCCCAAATCTTCCACTTGCCACA  
GTGAGGTTGTGTCTGGTCTGGGAC

>165

TCAGTAAGAAGAGTCCAGCCTGGGAAGAAGAACCCCAGCATCTTTGCCAAGCCTGCC  
GACACCCTGGAGAGTGAGTTGTGGCTGAAGCAGGGAGGGGCTGGAGGGGCAGCCTTT  
AACGAGCTTCCGAAGTGGATCTCTGA

>166

TGCCTCAACAGGGAGCAGCGGCCTGGCCAGAACTGCTCTAATTACACCGTACGCTTCC  
TCTGCCCACCAGGTAAGCCAGAACGCCCCACCCCCACCCGCTACTTCCCACTGGCCT  
CTACTCAGGGAGAGGGAGAACCTG

>167

GCAGAGATGGTGTGCTGTGCAGTGAGGCCAGCGAAGAGGGTCAGCACTGCATGGGC  
CAGGACTGTACAGGTACCACCTCCCTCCTGGCACTGGGCAGGGTGTGGTGGGTGAG  
GCTGAAGAATGAGGAGGGAGTTAGAG

>168

CCCATTGTACTCACAATGCCCAAGACTAGCCTGAAGGCAGCCACCATCAAGGCAGAGT  
TTGTGAGGGCAGGTAACATAAATTCTTTGGGATAGGGCTGGTGAGAAGGTCCAGATTTTT  
AAATAAAGGGATTATAGTGCTAA

>169

GGAGAGCTGGGCAGAGCGTGTCTGTGCTGTAAGGCCACAGGGAAGCCCAGGCCAG  
ACAAGTATTTTTGGTGCATTTCTGCTAGCTACCCTGCCCAATTCTCCTCCTGGAAACC  
AGAGCTTCTTGCAATTGGGTCTGGA

>170

GAGTACTTTTGCAAGGCCCAGAGTGATGCTGGGGCTGTGAAGTCCAAGGTTGCCCAGC  
TGATTGTCACAGGTAAGCCTGTCTGGGTCCCTGGGGCCCCCTGGGTCTGCAACAGGGTT  
GGCTGAGCACCCAGGTGGGCATAA

>171

CCGCTCCTCCTGGAGAGGGGATCTCTGCTGCTCCGACAGTTGAGCCCAGTTCCGGGGA  
GGCTGAAGGCGGGTAAGAGGTCCTGCCGCCCAGGAAGACGCGGGAGGGAGGCCCCG  
CCCCTCGCGAATCCCGCGGCTCCTGG

>172

GTGAGGTAGAGCTGCAATGTGGGATTTGTACAAAATGGTTCACGGCTGACACATTTGG  
CATAGATACCTCGTGAGTACTTTTCATAGTTTTTGTGAGAATTGCTCGGTAAAATAAATC  
TGAACATGCTCAACAGTTACTT

>173

ACCAACTACAGTTTTTCATTGCAACGTCTGCCATCACAGTGGGAATACCTATTTCTCCG  
GAAGCAAGCAAGTAAGAACAAACTCTGGAGTATTTGAAGATGATTATCCACTGGAAAA  
GAAAAGGGATCTGGGCGTAGCAG

>174

TTTGGCCAACCTGACATGGCAGTCCCGAACACAGGATGAACATCCGAAGACAATGTTT  
TCCAAAGATAAGGTACAGGTGGAATAATGTGATTGCAGTTATATTGAAGAGTTAGGTG  
GAACTTCTAAATATACTCCCTAA

>175

CTGGGAGTGCATGACAACCAGACAGAGACCTGGGAAAATGACTTGGCCAAATAACAT



TGTTAAAACAATGGTAAGTAGATTAAAATTGATTAGACTTGACATTTAAAAAACCATTG  
TTTTTTGTAAGAATTCAATAATAT

>176

AAAGGAACACCCAGATCCAGGCAGTAAAGATCCAGAAGAAGATTACCCCAAATTTGG  
ACTTTTGGATCAGGTACATTAATATGTTTTACATTTTCTTTTGGATTTTAAGCCACTCGGG  
GATAGGTAATCAGGTTCTGTTT

>177

AGTAACATTGGTCCTGCTTATGACAACCAAAAACAGAGCAGTGCTGTGTCTACTAGTG  
GGAATTTAAATGGTAAGTGTTTACATATCTCATTGCTGAAATATTTGGAAGCTATTGAAT  
CCAGTTGTGCCTAGAACTGGCC

>178

GAAAAGGACGAGGAGCCAAGCGCAAACAGCAGGATGGAGGGACCACAGGGACCACC  
AAGAAGGCCCGGAGGTGGGGAGAGTGCCACCCTGCCCCCTCACTATTTAAGTATTA  
TTTGGTGCTGGGAAAGTCCAGCAGAG

>179

AAACCTATTCCTGGAGACCTCTACAGAGCCTGCTTGTATGAACGGGTTTTGTAGCCCT  
ACATGATCGAGGTATGTAAAGTATTGGAGATCATATGGATGCAGGGTTACTTTGAACTG  
CCATCATTAGCCTTGTCACTCT

>180

TATTTTGAAATCACTGTGGATGAGATGCCACCAGATACCGCTGCCAGACTGGGTGGTC  
CCAGCCCCTAGGTAAGCTGGGGCCTTAATATGGACATCACAGCAGATAGAGAGGATAG  
ACCATCTGGCCAAGGGCTAAGGC

>181

GGGATTTTATATTAATCTTCCTGAAGACACAGAGACAGCCAAGTCATTGCCAGACACAT  
ACAAAGATAAGGTGAGTTTGTCCCTCTCCCGGCAGATTCTGGCTTTGAAGGCCTGTGG  
CAGCCAGTGCTTATCACTGGCTT

>182

TTTGTATTTTGAGGAAAAAGACTTTGTGGATAAAGCAGAGAAGAGCCTGAAGCAGACT  
CCCCATAGTGAGGTGAGTCATGGCCATAAGAACATTAGAATCATAAGGCCTTGAGCGTT  
AGGACCCATTCTTCATTATAAA

>183

AGGTGTGGCTTACAAAGATATTTTTGAGGGGGTTTACTTCCCAGCCATCTCACTGTACA  
AGAGCTGCACGGTACGTACATGTTTCCATCCCATGAGCAAACTTGAGGGAAGCAGAT  
GAATGGGTTGTGATGACAAAGTT

>184

GCTGGAAGCCAAGCGGCTGCAGTGCCCCTTTGAGCAGGAGCTGCTGAGACGGCAGCA  
GAGGCTGAACCAGGTGGGTGATGGGCACCCAGCAGGGACCACGCATCCTCCAGGGCT  
GTCCTCCAGGGAGGAGCTCTGCTGTG

>185

GGCTAAGGTCTCTGTTGCTTTTTGGTTCCACCTTAGAAGAGGCTCCGCTTGACTAAGA  
GTAGCTTGAAGGTAAGCCAGTGGGGAGGAGGGCTCCAGGGCCAGCGGCGGGAGCGG  
GAGGCCTGTTGGACATAGGGGCTGG

>186

ATGTTGACAACATTGCCGCCGATACTGCTGCTGTCTGGCTGGGCCTTTTGTAGCCAAGA

CGCCTCAGATGGTGAGTCGGGGGCACATCTCCTGCCTCAGGATGGTTCTGGAGAATCT  
CAGTCTATCTGGGCACATGGCAA

>187

GGCCTGCAGTCCTACCTGCTCCAGTTCCACGGCCTCGTGCGCCTGGTGCACCAGGAGC  
GGACCTTGGCCTGTGAGTAGGCGCGCAGCGGGGGCGGGGTCTGGGCGGGGCTAGTGG  
GGGCGGGGCCTGGCGGGTGGGGGCG

>188

CTGCGGGAATTCTGGAGGACACCTGTGTGCAGTATGTGCAGAAACATATTTCCGCGG  
AAAACACGAAAGGTATGATGGGACGGGGCCCAGGCCTGCAAGCTGGGGAGAGGGCG  
GGTTCCAGACAAATGGATGGACCTGA

>189

CAGGCTCAAGCAATCCTCCCGCCTCAGCCTTCCAAGTAACTAGGACTACAGGCATGTG  
CCACCACGCCTGGTGAATTTTTTAAATTTTGTGTTTGTAGAGATAGGTTCTCACCATATG  
CCCAGGCTGGTCTTGAATCCT

>190

TCTTCACTAGTTTCCTGCTGCTGGTGTACTCCTATGCCGTGCCCCCGCTGCATGCCGGC  
CTGGCCTCCACGTGAGTGGCCAGCTGGGCAGATGATGGGTGTAGGTGGGGGAGGGA  
TGGCACCCACCCATGGGGCCCTG

>191

TCAGTGCCAGCAGCTTTCACAGAAGCTCTGCACACTGGCCTGGAGTGCACATCCACTA  
GTGGGACACATGGTGAAGTGGCAGCCCCTGGAGCCTAACAGGAGTCCAGGCTCTCCAA  
GGCTGTGGCAGAAGACCGTGACCTT

>192

TACAAATGATGTTCCCATATCCAGTGTGGAGATGGCTGTGACCCCCAAGGACTCAGG  
GACAACAGTCAGGTACCACTGGGATGTGGCTGGGCAATGAAGGAGAGGGGACTGAGA  
ACATGGCTGGGTACCATGGTAAACC

>193

TTCTCTGCTCCCTGATAGCCCTGTGGGGCCAGCTTCATGCCTCCCTACTGGGCCTCAGCC  
AACTCCTGCAGGTATGAAGTAGGGGCGTGGAGGATGGGGGCTTGCAGGTGTCAGAGA  
CAGAGGGTTGGGGGTTAAGGGTTT

>194

GATGTGGGAGTCTTCTATGGTTCCACTGCTCCATCTCGCCTGCCACCTGGGGCACAGG  
GGCCTCAGCAGGTGAGGTGCCCAACCGCTGTGGGGAGGCATGAGCAGTCCCAGGAAA  
TTCCTGCTGTGAGGGGCCGGGGAA

>195

GTCTCAGATGGGGCCCCTGCACAGCCGTGCTGCCTGCTGATTGCAGAGCGCATCCATT  
CGGGTTACGAAGGTGGGCATGTCAGGGGCCCTGGCCTGGTGGGGGCTGGGAGGAAGGA  
CATCTCCTCATGGCCAGACATGAAT

>196

CTGGGGGCCCCAGTGCTCCTGTTCTGTCATCCTGAGGACCGACCCCTCATGCTGGCTAT  
CCACAAGAAGAGTTCTCTCGCCCTGCTCGCCCTTCCCACTGTCCTGGGCTTTTGAAGT  
GGCTGCCCTTGTGGTTGTGTCTC

>197

CAGCCCAGCTCCCTCCCTGGACACTGATATCCAGGAGCTGTCAGAGCAGATCCACCGG

CTGCTGCTGCAGGTGAGAGTAGCGGACAGGGAGCCTGGGAGGTGAGAAAAGGTGTG  
GGAAGCCGGGTCAAGCCATCTAACCT

>198

TCTCCACAGCCCTGGGTCTCCAGTGATAGCAACGGGGGTGATGCAGAGGGGCCTGG  
GCCTCCTGCGCCAGTGAGTGACCTGCTCCTACCTCACCTCTAATCGCCCTTTCCCCTC  
TCCTTCTTGGAACCAGCACTGCCA

>199

TATACCACCTCCTCAGCCTCTGACGACGACAGGCAGAGGACAGGTCCAGTCTCTGTGG  
GGACCAAGAAAGGTAAAGATCCAATGCACCCTGCTCCCACTGCCCCGTCCTGGCCTGG  
TGGCCCTGTGTCTTTTCCCTTCTG

>200

AGGATCCCATTGCTGCTCATGGCCAATGCTGACCAGCGCGTCATGATGACCTACCAG  
GTGCCCTCCAGGTGAGGCATTTTCAAGAGGCCTTCTTGGCCTTCCTTTCAGAGGTAGTAGT  
GGGGGCAGTTTTCTTTCTGGG

>201

GCGGCGGGAAGTGGGTGCTGTGCACTCCTGGGTCCGGAAGGGCCAAGTGCCTCGGGC  
TCTTGATGTGATGGTGAGAGAAGCCTGGGACGGGGAGAAAAAGAATTGAGCTCAAT  
TCAAGGGGGAGAAAAAGAATTGAGC

>202

CCTCCTCCCCGCGCTGGTGCTGCTGGCCCGGCTGGGGGCCCCGGCGGTGCCGGCCTGG  
AGCGCAGCGCAGGTGAGCGGCGGGGGGAGGCCAGGTGCCGGGTGGGGGGGTCCT  
CACGTCTGTGGGTCTGGTCTATCGGG

>203

CACGGCGGCATCCACTTCGACGACAGCGAGTACTGGGTCTGGGCCCCACGCGCTACA  
GCTGGAAGAAAGGTGACCGTCCAGGCTCCTCCTGGAGGCCTCTCCTCTGCAGCACAG  
TGGGCTGCCGCGGTCTGGGCTTTGGG

>204

CTGAACGCCACGCTGCGCGGCTGGAAGGCGTTGTCCCAGGACGAGCTGTGGGGGCTG  
CACCGGCTCTACGGTGAGTCCCTTTGTGCGGGCGGGAGGGCGGGGACCGGGCGGTCT  
GAGCCAGGCGTGCTCCCCACGCTCCC

>205

AGGGGCTTCTGCGACGCTCGCCGGCGGCTCATGAAGAGGCTCTGCCCCAGCAGCTGC  
GACTTCTGCTACGGTGATGCCACGGGCGGGACAGGGCTGCGTGAGGAGCTGGGCCT  
TGCCATGGCGCAGCTGAGGGGGCAC

>206

TGGTGCCCGAGGGCAGGAACGTGACCTTCCGCTGCGGCCAGAAGATCCTCCACAAGA  
AAGGGAAAGTGAGTGAGTGAGCGCCCCGGGCGGTCTCGGGGTGGGCAGCCCCGCGG  
GCGGCCTTGGGGCAGGGGTGCGGGGC

>207

CGTCTTTCAACTGGCAAGAGTCATTTTGACCAGCAGATTAATCAACTGTAAGACGGATC  
CTCACACAAAGGTCGGTACTTGGAATATAAACTGAATATTTTACTTTGAATATTGAAA  
TTTTTCTCAAAGATAACATT

>208

GAATGTAAGGGGAAGCGAGGTGTGAAGTATATTTATATACATATATACACACATATAGTC

AATGCCAAAAGTTTATCTTCTGTTCCCTCGGCGCCAACTTATTTCAACAACGCGAGCTT  
TGCTTAGAAAATCAATTCCAC

>209

TGGAACAGCCAGGTGTACTGCACCAAGGACCAGCCACAGGGGTCCCACTTTTGGAAA  
TCTTCCTTTCCAGGTAGGGGCGATGGAGAAAAGGGACCGACACGAGGGAGGGGGAGA  
GAGAAGGAGAAAAGAAAGGACTAAGA

>210

GAGTGGCGACCGCGGCTGGAGTGTGGGCCACCTCAAGGCCACCTGAGCCGCGTCTA  
CCCCGAGCGTCCGGTGAGAGCGGCCCCGACTTCCCGCCCCTAGGCTGTGGCCCCCGC  
CCTCTGCTGGGGATGCCACGTCCGG

>211

GGACCAGAGGTTAATTTATTCTGGGAAGCTGTTGTTGGATCACCAATGTCTCAGGGACT  
TGCTTCAAAGGTACATCACTTACACATTAACCTCTGAATGTTTTTAAGCACTCACCAG  
GTTAGGTTCAAGGTCCTTAAGTA

>212

AAAACGGCATGTTTTGCATCTGGTGTGCAATGTGAAGAGTCCTTCAAAAATGCCAGAA  
ATCAACGCCAAGGTGTGTCTGCCTCTTCATGATGGTAACAATTTGTATCATTCAGACTTT  
CAGGGGAGTAATAAAAGAAGTT

>213

CAAGTGATGGTTTAAGGCAAAGGGAAGTTCTTCGGAACCTTTCTTCCCCTGGATGGGA  
AAACATCTCAAGGTGAGTGTTATAATAAAGATCTTGGCTTATGCAACATGAATGTTCTT  
CGTTTGCATCAATTTAAGAATAA

>214

ACACACCCTATGGGTGGCTTCAGCTTTCCTGGTTCCAGCAGATATATGCACGACAGTAC  
TACATGCAATAGTGAGTCCTTCCCGCCATGCTGGGTGTGGCCAGGGCTCCCGGGAATT  
GAAGGGAATTTTATCCATGTTAC

>215

GTATCCTCTACTTCTACTCCTCCCTGAGCAGATTCTCATGGTCATGGGGGCCACCGTTG  
TTATGTACCTGTAAGCAGATGGTTTCTCTAATATAAATTACACTACACTGTGTTACACT  
AAGCAGATTTTGCTCTTTTT

>216

GGTTCAGAACTTCCCAAATGATGGTCCTCCTCCTGACGTTGTAAATCAGGACCCCAAC  
AATAACTTACAGGTATGGAGCCTCCACGAAGCCCAGGCGAGCTTGACGTGATATGCC  
AGGCTCTCCAATCCTCAACCTTTA

>217

CAGCATCACATCAGCATTAGGGATGGTCCTCTTAGGAGCCAAAGACAACACTGCACAA  
CAAATTAGCAAGGTAGCTATCAGCATCATTACGTTGTCCTGTTGCAGTTTTTCTCTGGTT  
CCGTCGGCTAGCACGCAGATGG

>218

ATCCACTGATGCATATGAGCTGAAGATCGCCAACAAGCTCTTCGGAGAAAAGACGTAT  
CAATTTTACAGGTAATTTACCTGGCCTACCCACATTTCAATTGCATCCTGATGTCTGT  
GTCTCTGAGTGGCCAAATGGAA

>219

ACTGATTTTGCAAATGCTCCAGAAGAAAGTCGAAAGAAGATTAACTCCTGGGTGGAAA

GTCAAACGAATGGTAGGAGAGCCACCCATTATAGAAACACCTTTGAGAAACCTATGCC  
AGTGAGCCTTGTGCTTGACACTGC

>220

TTTCAAAGGGCAGTGGGAGAATAAATTTAAAAAAGAAAACACTAAAGAGGAAAAATT  
TTGGCCAAACAAGGTATTGTCTATATTTTATTTATATAGTGTAAATATGTTAATACATGGAAT  
GTAAACATTTCTGATGGAAT

>221

AATACCATACAAAGGCAAAGATCTAAGCATGATTGTGCTGCTGCCAAATGAAATCGATG  
GTCTGCAGAAGGTAAGAACTTGCATCTACAACCTTCCTTCTACTGCCGGACATTTTTC  
CAAAGATACCAAGTTTAAACAA

>222

TTTAACGCTGACAAGTTCTGCATTTCTGCTGTTTCAGTTGTACTACTACAAGCACTATTT  
ATCAACAAAGGTAATTTTATTCCTTCTTTCTTATCATTCCTCCTTTCTTATCATTTGTATATT  
TTCTGATCACACTTCTCT

>223

ATGCAAGTTTTTCTGTGTTCCAAGAGACTTTACTGCATTTGCACTGCAGTATCACCTATG  
GAAGAATGAGGTAAGTGACTTGCTTTTCAGATAATGGAATGTGTCTCTTTTTACAAAATA  
GTATAGGTTTAGGCTAGTTTA

>224

AACACATTGACAGGAAATTTGTTCCCTTCCGAAAGTTACAGTTTGGTCGTTATCCAGGA  
GCTTTTGACAGGTAAGTTCAGAGTCAAAACGTGAAATGTGAAATGAGTGTTGTTTCAGT  
CATAATTCTTGCAGTGTTTTTAC

>225

CTTTGTAGAAGAAGTACCACACTCTAGGTTTATTGAGTGTAGGTATAAAGAAGCTCGAG  
CATTCCTTTCAGGTTAGAGACAACCAAATGTGTACTTTTAAATTAAAGAAAATGTTGGGA  
TTATTTTTAATATTTGAGGGTG

>226

CTGCAACTAGCAGCGAAAACATTAAACAAATTGGGAGTACCATTCTGGCTGAGCAGTG  
GAACTTGTCTAGGTAAAATTCTTACGACTTTCCATTTGTCTTTCTGTCATTTTGTCTCT  
GGCTTTAGGGATTACTGCTTGA

>227

AGATTACAAATCTGATATTATTTTAGCATTTTCAGGATGCAGGACTTCCGCTCAAACACA  
AATTTGGGAAGGTCAGTAACAAAAGTCGGCTTCATTTTCATAAGTAACATATCTCACTTG  
TAAAGTTTACATTAAGCAACTC

>228

TTTTCTTCTATGAAGAACTGATCACATGTGGAATGGAGGCACTCAGGCCAAAACAGG  
AAAAAAATTCAAGTATGAATCAAATAAGTACTTATTTATAAAGGTACTACAGAAATAATT  
TCAGGAGGTAGAAATAAAGAAG

>229

ACCGAAACCCTGCAGAGGGAACCTGGTACATCCAGTCACTTTGCCAGAGCCTGAGAG  
AGCGATGTCCTCGGTAAGTTTTGCCTACTCAGCCCTCCTCACTGTTACACTACCTTCCC  
CCCCTACTCCATCACACTACTATC

>230

GTGGTGGCCGTCGCTGCCAGGCACAAGTGTCCCGCCGCATCTCCTTCAGCGCGAGCCA

CCGATTGTACAGGTAGGGTGTGCACACAGGTACAGCGGCGGGCGGTGGGCGCCGGGC  
CCCGGAACGTCACCGGGGCGGGGCC

>231

AGTGATGAAGAAAACCTTGAAACTGTTTGGGAAATGCAACAATCCAAATGGCCATGGGC  
ACAATTATAAAGGTGAGAGAAAAACTGATGACATTCAGCCCTTCAATAAGGATGAAA  
GAGTATTCAGCAAATGTAGACATA

>232

GTATTCCCGATCTGCCATGTATTCCAGAAAGGCCATGTACAAGAGGAAGTACTCAGCCG  
CTAAATCCAAGGTAAGGGAAGAGGACCACGGACCATTATGTCTTAACCTTAATTGGCAT  
TCTCTTACTGTTGATGCATTTG

>233

CGCAACTGTTACAAAACCAGTTGGTGGTGACAAGAACGGCGGTACCCGGGTGGTTAA  
ACTTCGCAAAATGGTAAGATGTGGGGACTGTAAATTGGATTTTCTGTTTATGCTTGAAT  
ACTGTGAAGATGTTTTTGAATACT

>234

GAGAAAACCTGCGAGCCAGCATTACCCCCGGGACCATTCTGATCATCCTCACTGGACGC  
CACAGGGGCAAGGTGAGAGTACCTGTGCTTGGGGCGCTTCACTGCAGCTGCCTGGGG  
TGCCTGGTGGCAATGCGTTTGCACG

>235

TTACTTCAAGAAGAAGAAGCTGCGGAAGCCCAGACACCAGGAAGGTGAGATCTTCGA  
CACAGAAAAAGAGGTAAGTTTCTACTTGTCTATCTCCTGTGTTAGCACTGGCCCTTCTAC  
CTGGGAGTGAAAAGAAACAGGTTG

>236

TCCCCAGCGCGCAACCACCCCCCGCCTGCCTGCCCAAAGCACCGGGACTGGAGCACG  
GAGACCTACCAGGGTAAGTTGGCACTCCTTGGCCCTTCAAGCCTCAACTGCAGCCCCA  
TGTTATGCGCCACTCTCAACTTGGA

>237

GATGTACCCTGCCCACATGTACCAAGTGTACAAGTCAAGACGGGGAATAAAGCGGAGC  
GAGGACAGCAAGGTAAGCAAGTGCACCCCTAGGGACCCTGCGCTCAGCCCCTCGCGC  
GCGCTGAGTTTCCAAGAAAAGTTTT

>238

GAGACGTGACCGGATTAACGAGTGCATCGCCCAGCTGAAGGATCTCCTACCCGAACAT  
CTCAAACCTTACAGTAAGTGAGAAGCTGGCCCCCTTCCAACCCAGTCCTTTGCCAGAG  
GGCGGGCGGGTCACTCGCCGCCTG

>239

AAAGCACTAACAAACCTAATTGATCAGCAGCAGCAGAAAATCATTGCCCTGCAGAGTG  
GTTTACAAGCTGGTGAGTGCTGATTCTGGCTATGCTCTCTTTAAGAGTTTGAGTGCAA  
TAGAGAGCCCGTGGGCTCAACAT

>240

GGCCGGGCTGCAGGAGCTGCGATTCCCTGAGGAGAAGCCGCTGCTCCGGGGCCAGGA  
CGCCACCAGCTGGTGAGTTGGAGTCGCGCCTTTGAGGTCTTAGGGCCGAGCGCGCC  
ACCTCGTGGCCAAGAGGGAGACCGCG

>241

GGCCTTTGTTTGTCTTCCTGGTAGAGGCGGGTTCCCTCCCTCGGCAAGATGCCGGAG

TGCTGGGATGGGGTGAGTGAGGGCGCTGCGGGCATCAAGGTGGGCGGGAGGATGGT  
GCATCCTTATGACCCACCGCAGGGA

>242

GTAGTGATCCGGGGCTCCCCAAGGGGAACCGCCCAGCCATCCTCACCTACCATGATG  
TGGGCCTCAACCGTAAGTGCAGCCCAGCCTCAGTCAGCCCTCCTCTGCCTCCCATCAG  
CCAGAGCGGTGAGGCCCCCACCC

>243

CCAAGCACTTTGTGGTGTGTACGTGGATGCCCCTGGACAACAGGTGGGGGCGTCGC  
AGTTTCCTCAGGGGTAGGTACCCTGAGCCCCCTCTGCCTGTCTCCAGCTCTGCACCTG  
AGGCCACACCTGGGGCCCTGACCTCC

>244

GGTGGAGGGGCTGGTGCTGGTGAACATCGACCCCAATGGCAAAGGCTGGATAGACTG  
GGCTGCCACCAAGGTGTGTGTGGTGACCGGGGGTGGGGTGGGTATACCTAGGGTGGG  
GTGAGGGGCGGCACTCACGCTGGCGC

>245

GCTACCGGCAGCAGATTGGGAACGTGGTGAACCAGGCCAACCTGCAGCTCTTCTGGA  
ACATGTACAACAGGTGCGGGTGGGATCAGCAGCCCTGGGACCCAGCACACCCCAAGT  
GGGGCCCTTGCACACTGCCCCCTGAG

>246

GCTGGGACTTGAACCAGCAGTAAGATTTTCACGACACAGTGCTGTCTGCTTCTCCGTA  
AGAAGTTAGAAGGTAAGAAAGCCAGAAATCCCGTGGAGAGGCAAATGTAAGGGATGT  
GGCAACGACCACTCTATTCTACAG

>247

ACCTGACGACTTTGATTCTGAAGACAAAGAGATATTAAGCTGGGATATTAATGATGTGA  
AACTGCCACAGGTATGTACTTGCTATAAAAATCTGCCTTCAACATTGGGCTGTGAAGTC  
TTGACTATTAACATGCGGAGAC

>248

CTCGCAGAGGAGGGGCGCAAGATCTACCTGAGACCTGCCATCTGTGACAAGGCCCGG  
CAGAAGCAGCAGCGTGAGTAGAGCTTCGTGGCACCAGCAAAAAAGCTGACATCCCTC  
AGATGCCCCTGCCAGATGGGTCACTG

>249

TTGCCGAGGTCATGGGGGCTTCCCGGTCACCAACTTCTGGAGGCACGACGGACGCTTT  
ATATTTTCCAGGTTGGATTTTGTAGTTAGTTACGTGAGAGTTTCATTACTGAGGAGTTT  
CACCAGAGGCTAGAAATGCACC

>250

AGCCATGAAGAAAGTGAACACAGCACCTTCCTCCGTCTCATTGAGCCTGAAGGGGAG  
CACAGAGACCAGGGTAATCCTTCATTATGTATGTTCAATACATGCAGTAGCTTGCCACG  
CCTGTGCTGGGGGCGGTAGATTTC

>251

CTAGAGCGGTCCTTGGGGAGACGCGGGTCCCAGTCCTGCGGCTCCTACTGGGGAGTG  
CGCTGGTCGGAAGGTGAGTGATCCCTGTCTGGGGACCGGGGGACTTGGGAAGGACAG  
TTCCCGGACTGGACGGCCAGAACGCT

>252

GACTACGCAGGAAAGCCCCAGCCACCCATCAAATCAGAGAGAAGGAATCCACCTTCTT

ACGCTATGGCAGGTAATGATTCACTATTGTGGAGTAAGACTTTTTTTTTTTTGAGATGGG  
ATTTTGTGTATTGCCCAGGCT

>253

TGCACCGTCACAGTGTCTGATTTGTATGCCATGAACTTTGAGCCGAGGGCCACAGACA  
AAGATATCACTGGTGAGTCATGGGATAAATGCTCTATTTATAAAAACCTATCTTTATGTTTT  
TTACTTTAAAAAATGTTGACT

>254

AAGGTCTCTGGCTAGCGACATCACTGATGAGCAGAAAAAGGTTTCGGGAGGCTGACCT  
AGTGATATTTCAAGGTTTGTCTCTCTAATTAATATATTGAATCAGATTCATCTTATGTACA  
AACTCTTCTGAATATTGAGT

>255

GATGGATAGGGTGCTGTGCCAGGGCTTTGCCTTTGACATCCCAGGATTCTACGATTCCG  
GTTTGCTCCAGGTATGTGCTCTTGGATAAGGATCACTATGGATAGTTGGAGGGAGGGGA  
CAGAGGATGCGTCTTCTATCAA

>256

AGGCACGGCCGAGATGTACACGAAGACAGGAGTCAATGGAGATTCTCGATACTTCCTG  
TGGCCACTCCAGGTAGACCAGCTGCGAGTGGCTCCCTTGCTTGTGGCACACGCACAC  
ACAGACACACACATGCACACATGC

>257

TCAGAATGACCCTTGGGCCCCCACTGTGGATTTCACTGACTTCATCAACAATGAGACC  
ATTGCTGGAAAGGTCAGCTGGCCGGGGTAGAGGGTACAGGATGAGCCTTGCTTTCTCT  
TGGGAGGGTCCCTGAAAACCACT

>258

GGCAGTGTGACCAAGAACCATGCCTGGTGGATCCAGACATGATCAAAGCCATCAACCA  
GGGCAACTATGGGTGAGAGGCCCTAGAGGCACCCTCAGTGGGCACACATGCATACTCA  
TGCATGTATACACGCATGCTGTGC

>259

TGAGGGCATTTCGCTACCGCCTGGGCACCATCCGCCCATCTTCCTCGGTCATGAACATGC  
ATGAAATTTATGTAAGTCCATCCTTCCCCACAATGCTGCCATCTCCCCATGGCTCAGAAC  
CTCAGGGATGCTGGCCCTGTG

>260

TGGCCCAACCTGATTCATGAGCCTCTTGACCAAGGCAACTGTGCAGGCTCCTGGGCCT  
TCTCCACAGCAGGTAAGCCAAGGGCAAGGGCTGGCGCCTGGGAGAGGAGGGCCAAG  
TCCTGAGCCTCCCGACAGCCCCTCTA

>261

ACACCCACCAGCAGCAGGGCTGCCGCGGTGGGCGTCTCGATGGTGCCTGGTGGTTCCT  
GCGTCGCCGAGGGTATGCAGCAACAGGGGATGTGGGCAGAGAAGAGGGCAAGGAGC  
TCCGTGGGCATGGCCTGGGCCATGAT

>262

CTGCCCCAACAGCTATGTTAATAACAATGACATCTACCAGGTCACCTGTCTACCGCC  
TCGGCTCCAACGTAAGTCAGCACTTGGGTGAGGGCGCCGAGGCAGGAGGGTTGTGAA  
AGCCTGGAGTCTCACCCCTGACGT

>263

ACACGCCAGTGAGCCTTGGGAGGCCAGAGAGATACCGCCGGCATGGGACCCACTCAG



TCAAGATCACAGGGTGAGGGGCGTGTGGGCAGAGGGGGTTTGGGACAGCAGGGTTTG  
TGCTAGGGGCTCTGGAGCCTGCCTTG

>264

GGTGCTGGTGTACGGCGGCAGGGGCGCTCTGGGTTCTCGATGCGTGCAGGCTTTTCGG  
GCTCGCAACTGGGTAATGCTGCGGGCTGGGGCTGCTGGGTCTCCGCGGGGGTGGCCG  
GGGGCTTTCGTGTGGAACCCGGCGG

>265

GGAGAATGAAGAGGCCAGCGCTAGCATCATTGTTAAAATGACAGACTCGTTCACTGAG  
CAGGCTGACCAGGTAGTTTCAAAAAGGCCCCCAAACATTGTGAGGGGAACCCTGGGG  
AGAGGTGACCACTGGCTGTATGTTT

>266

GGTGAAGAGAAGGTGGATGCAATTCTTTGCGTTGCTGGAGGATGGGCCGGGGGCAAT  
GCCAAATCCAAGTGTGAGTCCTTTCCCTGAGTCACTCATTGTTCTGCTCTGCTCTTTTTC  
CAGCTGACAAGGATTGGGTTTGC

>267

ACCAAGCATCTCAAGGAAGGAGGCCTCCTAACCTTGGCTGGCGCAAAGGCTGCCCTG  
GATGGGACTCCTGGTAAGCCTTTATTTCCCTATCTGTGGAGTGGGGTTGCTTACCTTGCT  
TGCTGGGGCTGCTGGGCACTTTC

>268

AGCTCTGCCAGAGCCTGGCTGGGAAGAACAGCGGCATGCCGCCCCGGGGCAGCCGCCA  
TCGCTGTGCTCCCGTAAGTGCTTGGGGTTCCCTGGCTGCTGCCCACCTCTGCCCCACTG  
CTGCAGGTGACCGTTTGTCTGACT

>269

CCCCGATGAACAGGAAATCAATGCCTGAGGCTGACTTCAGCTCCTGGACACCCTTAGA  
ATTCCTAGTTGAGTGAGTATTACAGACATGTCCATGACTGAGCAGCTTCCAGCCCCTAT  
TCTCTGCCTGCTGTGGTCCAGAG

>270

CGCGCTGTTTACATCTTTGCCAAGAAGAACGACATTCCCTTCGAGCTGCGCATCGTGGA  
TCTGATTAAAGGTAGGTCCAGCCTCGGGTTTGGGGAACCGAAAAGTCAGGAAGGGGA  
CAGGTAGGCATACATAGCTTAGGG

>271

CCTTTGCCCAGGTGAACCCCCTCAAGAAGGTGCCAGCCTTGAAGGACGGGGACTTCA  
CCTTGACGGAGAGGTAAGTGGGACCTAGGACTGCTGCCAGGCCTGCTGGAACCATCC  
TGTTCTAACCCCTCTATTTCATAGAC

>272

TGTGGATGAGTACCTGGCATGGCAGCACACGACTCTGCGGAGAAGCTGCCTCCGGGCC  
TTGTGGCATAAGGTGAGGCTGGGAATGTGGGGGGCGGCAGCGAGAGCATTCCCCAAA  
GGTGTTCAAGGCACCAGTCTCTTCTT

>273

GAACAAGGCCTTCCTTACTGGTCCTCACATCTCCTTAGCTGACCTCGTAGCCATCACGG  
AGCTGATGCATGTGAGTGCTGTGGGCAGGTGAACCCACTAGGCAGGGGGGCCCTGGCT  
AGTTGCTGAAGTCCTGCTTATGCT

>274

TTATATCCTCTGGGCCTGGGTTTCCTGAAGTCACCACACATAGAGGAGAGAGAAAATG

GCTGAGTTAAAGGTAAGAAACCATCTGACAAGTTTGCTATGGCTTCTTCAGCCAAAATT  
TATGGAAGTTTCTGAGAACTTCA

>275

CATTTCTGGATTTGGGAATGAGTGTTCTTCAGAGGATCCTCGCTGCCCAGGTTCCCTGC  
CAGAAGGACAGGTATGAGCAAATAAAGTGCTTAGAAGAGCTCTGATTCCTATTTCTTG  
GATGACTAGCTTTCAGGCCAAAG

>276

CCTACAATCTCTATGCTGAGCAGCTCTCAGGATCGGCTTTCACCTTGTCCACGGAGCACC  
AATAAGAGAAGGTACAAGGATTAGATGAATTCTGACCTGCAGACTGTGGGTACTATGA  
CAGGGACTTTGTGCTGCCTCCTT

>277

GCCCTTTGAATCCATTGACGAAGGCCATGTCACTCACAACCTGGGATGAAGTTGATCCT  
GATCCTAACCCAGGTAACCTGGTCCTGTGAATTGAAGCTTATCATATACCCAAAGCCTG  
ACTAGAAATACCTAAATAGAATA

>278

CTGGAGACATAAAGTCTAACAATGGGCTTGCTATCCACATTTTCCTCTGCAATACCTCCA  
TGGAGAACAGGTAAGTGGCTCAGTTTATAGGGAAGGACATGCCCATCTTCTAAGGGATT  
TTGGCCAGAAGTCAAACCTCCAG

>279

AGGGAACCTTCTCATTTACACCGAGTTTGGCAAGATGCTTGTACAGCCCAATGAGATCT  
GCGTCATTCAGGTGGTGATGTGTCCCCTTCTCTTCCCTGCTTCTACTAATTTGGGAGC  
AGTCAGATGTTTCAGCTGCTG

>280

GAGGAGACCAGGGGCTACATCTTGGAGGTCTATGGTGTCCACTTTGAGTTACCTGACC  
TTGGACCAATTGGTAAATCTTCATTACAAGCCTCTAAGCCTCGCTTGAGATGTAGGACT  
CAGATAATTGCATGAAAGTTAAA

>281

GGATCGCCAAGTACCAGGTGGTTACACGGTCATTAATAAATACCAGGGCAAGCTGTTTG  
CTGCCAAACAGGTAAAGTAAAAGGGTTGGCAGGCAAGGGAGGAAATGAAGAGTGATT  
GAGCACTTACTGATTGCCAAGGCG

>282

GAATTATACACCCTACAAGTACAACCTGAAGAATTTTCATGGTTATCAACTCAGTGGCCT  
TTGACCATGCAGTAAGTCTGAACCCTGTAGGGGCTTGGGATGAGGCAACGCTTGGGT  
GGGAGGGGTCCACAGTAGACCCC

>283

GCTGATTTTGTTCATCTTCCCACCTCGATGGGGGGTTGCTGATAAGACCTTCAGGCCTCC  
TTATTACCATAGTAAGTCTCTCTTTTACCAAGCCACATTTGCAAGCCAAAGAGACAACA  
AAGCAGTGAGCGCTACACATTG

>284

TGATGCTGACTGCTTTGAGAAGGCCAGCAAGGTCAAGCTGGCACCTGAGAGGATTGC  
CGATGGCACCATGGTAAGTATGTTAACTGCCACATTCCAGCGGCCTCTGAACTCCCCAC  
CCTTACTGAGAAGGGTTGCCGTTT

>285

TCAGGACACAACCTGTGGGACGTGCCGTCTGGCTGGAGAGGAGCTGCCTGTGACCAG

AGGGTTCTCATAGGTAAGTGGAGATATGAATGAGTTCATAAGTCCTGCATGAGACTCAA  
GGCTCTTAATAAAAATCTTAAATCA

>286

CTCTCATGAGGGACCAGCTTTTCTCACATGGCACAGGTACCACCTCCTGCGTCTGGAG  
AAAGACATGCAGGTATGTAAGAAGCATTTCAGTTTGCAGACTCTTTACAGACAAGATG  
CCTTGTTTGTAAGTGATTTTAATT

>287

GTCTTTTCTCAATGGCGAGTGGTCTGTGACTCCTTGGAAGATTATGATACCCTGGGAAC  
ACTTTGTAACAGTAAGTTCCAAATGATAGCTTGGAGTCAGAATTTCTTTTATAGATAAAG  
AGATTAAATATGTTGCCTGAAA

>288

CCTATTTTTGTCCTCCTGCACACCTTCACAGATGCAGTCTTTGATGAATGGCTGAGGAG  
ATACAATGCTGGTAAGACATTTTCATATGCTTTTTGCATGCTCAGCTGGGCGGATTGTTT  
AGATGGCATAGTTATCAGTTC

>289

GTCACCAACACAGAAATGTTTGTACTGCTCCAGACAACCTGGGATACACTTATGAAAT  
TCAATGGCCAAGTGAGTGTTGAAAGTGATTTTTACTGTGATAATTTCCAAAAGCAAAT  
GTGTTATCTTTCAAGTAGAGTA

>290

CTTTTCCAGCTCCAATCTTTGATGATCAGTGTAAACTACACGATACTTTTCTTTTGTCT  
GGTTTTCCCTGTTAGGAGAGAAAGCATTGCATTTAATCTTTTTCTGCTTCTTGGAGATTG  
TTTTAGTTAAAGAAATCATA

>291

ATGCTCAGCTTTGTGGATACGCGGACTTTGTTGCTGCTTGCAGTAACCTTATGCCTAGC  
AACATGCCAATGTAAGTGCCTTCAGCTTGTTTGGGGGAGACTGGGTAGAGAGGTTAGA  
TGGGAGGGCACCTGCCCTGAAA

>292

AGATGGTGAAGATGGTCCACAGGCCCTCCTGGTCCACCTGGTCCTCCTGGCCCCCCT  
GGTCTCGGTGGGGTAAGGTGTCTTACGTATTGCTAACTTTTAGCTAACTTCAGTTGAAA  
GAAGGTTTATTGTGGAATTTATT

>293

TCCTGCTGGTCCCGCCGGTCCCGTGGTGAAGTGGGTCTTCCAGGCCTCTCCGGCCCC  
GTTGGACCTCCTGTAAGTAGCCACTGTCTTTAACTTTATTGAGTAAAAGAAAACAAA  
GGTGGAGTATGGGGAAGAAGAAGA

>294

CCTCCCTGGACCCCGCGGTATTCCTGGCCCTGTTGGTGCTGCCGGTGCTACTGGTGCCA  
GAGGACTTGTTGTAAGTGGTCATGACTGTGGTTCTCATCATCCTGAAATACCACCTCTG  
CCATCATTTTCATCACTATCTAG

>295

TGAAGAAGGAAAGAGAGGCCCTAATGGGGAAGCTGGATCTGCCGGCCCTCCAGGACC  
TCCTGGGCTGAGAGTAGGTTTCAAATGCTCCCAACACCCTAACACACCAGAGGCAGAT  
TATGATACCCCTTCATTGGGAATTG

>296

CCCTGCTGGAGTCCGAGGACCTAATGGAGATGCTGGTCGCCCTGGGGAGCCTGGTCTC

ATGGGACCCAGAGTAAGTTTCAAACCTGATTCTGAGCAAATCACACCTGGCATTACTTCC  
TTCTTTAAAGGGTTGGTTAATAT

>297

CCCAATTGGCCCCGTTGGAGCAAGAGGAGAGCCTGGCAACATTGGATTCCCTGGACCC  
AAAGGCCCCACTGTAAGAATCACCACAACCTTTCTTACCCTCAGCACTTTCTGTAGCCA  
AATTTTACCAAACTCTAGTATTTA

>298

TGCTGCCGGTCCTACTGGTCCTATTGGAAGCCGAGGTCCTTCTGGACCCCCAGGGCCT  
GATGGAAACAAGGTAAAATCTTATGTTTTCTATATTGCTGGTTTGGCCCAGTCTGCCTG  
GAATAAGTAGACCCTTTACAATA

>299

TCCATCTGGTCCTAGTGGACTCCCAGGAGAGAGGGGTGCTGCTGGCATACTGGAGGC  
AAGGGAGAAAAGGTACGTGTTGACCCCTATTACATATTGTTGATGAACTCTAGTAAAGA  
AGGCTGCACAAGGATGCCCAAGT

>300

AGGCAAAGGGCCTAAGGGTGAAAACGGTGTTGTTGGTCCACAGGCCCCGTTGGAGC  
TGCTGGCCCAGCTGTAAGTTGAATTCCTGGTGGTCCACACAGCAGCTACCCATTAGAT  
CTTCCAATTAAATATATATCCGTC

>301

AGAAGTAGGTGCAGTTGGTCCCCCTGGCTTCGCTGGTGAGAAGGGTCCCTCTGGAGA  
GGCTGGTACTGCTGTAAGTGATTTCCAACCTCCTTTCTTAATACCTTATGCTGAATTAA  
AATAAAGCCCCTACACAGATCTT

>302

TGCTCCTGGTATTCTGGGTCTCCCTGGCTCGAGAGGTGAACGTGGTCTACCTGGTGTG  
CTGGTGCTGTGGTGAGTGCTTGACAGTATTCTGACTCCATTAAACATAAGAAAAGATTTT  
AAAAGCTGCCACTTCAAATGTG

>303

GGCCCGTGGTCCTCCTGGTGCTGTGGGTAGTCCTGGAGTCAACGGTGCTCCTGGTGAA  
GCTGGTCGTGATGTGAGTCCAACACTTGGTTTGTAATAAAACTGAGCAGGATTTTCAT  
TGTGTGAAACTTTATGTCCTGAG

>304

TGCTGCAGGTGCACCTGGTCCTCATGGCCCCGTGGGTCTGCTGGCAAACATGGAAAC  
CGTGGTGAAACTGTAAGTTTGTGAATACCAGTCCCTCAGTGCAGCATTTCTCGTGGGCTT  
CACTTCTGACTTCCCCACACTTG

>305

TGAAAAGGGGCCCAGAGGTCTTCCTGGCTTCAAGGGACACAATGGATTGCAAGGTCT  
GCCTGGTATCGCTGTAAGTAACTGTAGCCATCTCGCACATAAACTGATCCTGAAGGCC  
TTCAGCTCAGAAGGATTTTCATAT

>306

TCGCACTGGACATCCTGGTACGGTTGGACCTGCTGGCATTTCGAGGCCCTCAGGGTCAC  
CAAGGCCCTGCTGTAAGTATGATTTGGGGAAATAATAAAGAAGATCACGGACCTAAGG  
AATGTTTTCTTCAGACTAAACCAA

>307

GAAGGCTCTAGAAAGAACCCAGCTCGCACATGCCGTGACTTGAGACTCAGCCACCCA

GAGTGGAGCAGTGGTAGGTCAAGATGTCCAGACCAGACTGACCCCTTCTCACAAGTTG  
AGCTTTTCAAATTAGTTTCCATTGA

>308

GAAGTGGTATAGGAGCTCCAAGGACAAGAAACACGTCTGGCTAGGAGAACTATCAAT  
GCTGGCAGCCAGGTGAGGAATCCCACAAACACCTCTCCTTCTGCTAAATAATATTTTGG  
TAGGACTGTTTGTTAATTATCTG

>309

TAATGATGTTGAACTTGTTGCTGAGGGCAACAGCAGGTTCACTTACACTGTTCTTGTAG  
ATGGCTGCTCTGTAAGTAATAGTGAAATATGGGAATAGCTTTGGGAAGTGGGATGGAGG  
GGGTTCTAACTTAGACTGCCCC

>310

CGCCGAGGGCCTGAGTGCTCCAGTAGCCACCGCATCTGGAGAACCAGCGGTTACCATG  
GAGGGGATCAGTGTAAGTCCAGTTTCAACCTGCTTTGTCATAAATGTACAAACGTTTGA  
ACTTAGAGCGCAGCCCCTCTCCG

>311

GAGGAGTGGAAGGAGTTCGTGTGGAACCCGAGGACGCACCAGTTTATGGGCCGCACC  
GGGACCAGCTGGGGTACGCAGGGCCGGCACGCAAGGGGCGGGGAAAGCCGCGGGG  
CGACGCCTCGGGGGCGCAGGGTCCCGC

>312

ACCATGTGGGTGATGCTGCAGACTGTCTCCGACCATACCCCCAAGTACCAGGACCGAC  
TGGCCACACCGGGTGAGTGTGGAGGCTCCCCCTGCCAGCTACTCTAACTGCTCTTGTG  
CCCCCAAACCTCCAGAAGGAACTC

>313

GTCATTGTCAATGTCAGTGACACTGAAAGCTGGGACCAGCATGTTTCTAGAAGCTCAACA  
AGTTCTTGGAGCGTGAGTGTGGGCCTGGTTATGTGTCAGTTCAAGACTTCGGGCAGGG  
GACTGGGGACCTTGGAAGTGGAAC

>314

CGGCATTGGGGACTCCACCCACTATGGTTACAGCACTGGGCAGCCCTGTGTCTTCATCA  
AGATGAACCGGGTATCTATGACCTTGGTCCCCAGGGTGAATGGAGGAAGGATCTGGGG  
ACACCACCTGCAGACAATTGCAT

>315

CTTCGTCATGTTCCCCGCCAACGGCAACATCGACCTCATGTACTTCCCCTACTATGGCA  
AAAAGTTCCACGTAAGTCCCAGGGGAGGCCAGGCTGGATGGCGGGTGCGGGTGGTG  
AGCTAGGGAAGGAGGCCGCGTTGC

>316

AACCAGAGCTGGGAAGATTCTGAACACCGACCTCGTCCCGGCCCCCTGCAGTCCGGATAC  
TCACGCCAGAAGGTAAGTGAAATCTTAGAGATCCCCTCCCACCCCCCAAGCAGCCCCC  
ATATCTAATCAGGGATTCTTCATC

>317

CTACGTGCTGCCCTGCGCCCGCAGCCATGTGCCGCACCCTGGCCGCCTTCCCCACCAC  
CTGCCTGGAGAGGTAAGGGGAGGTTGTCCAACCTGCTTGGGGGAAGTCCCACCAACTC  
TTAGGGAGTGAGCGGCAGGCCTGG

>318

AATCAGAGCTGGGCTGCGATACTGGGAGTACTGGCAAGTTTCGAGTGGGGCAGTAAAC

ACAGCAAAGAGAAGTAAGTGTTGCTGACCAGCTCAGGGCTCCGAGAGGGAAGGGAG  
TGGAAGGGAGTCATGAGGAGGGAAAT

>319

AGCTACCAAGCTGGCCTCCAGGGCACACCAGATCTTTGAGGAGTTCATTTGCAGTGAG  
GCCCCTAAAGAGGTTAGAGCCCCCATATGCCAGTGAATCCTCACGACCCTGCCTGCTC  
CTTCCCCTCTGAGAATCAGGGCT

>320

TTCGACGGCGAGCCGCAGCCCTACCCAACGCTGCCGCCTGGCACGGGGCCGGCATCC  
ACAGCTACCGAGGTACGGGCCCCGGCGCTTAGGCCCCAGCCAGCAGGGACGATAGCAC  
GGTCTGAAGCCCCCTCTACCGCCCCG

>321

CAAACCTGAATTATTTGTGCCATCTCTCAATGTTGACGGACAGCCTATTTTTGCCAATATC  
AACTGCCAGGTACTGACGTTTTACTTTTTAAAAAGATAAGGTTGTTGTGGTAAGTACA  
GGATAGACCACTTGAAAAATT

>322

TTCAGCCATGCCTCACAGCTCCGACAGCAGTGACTCCAGCTTCAGCCGCTCTCCTCCC  
CCTGGCAAACAGGTAGAGTCCTCCTTTTTCTCTCTCTCTACCTTCTGATTCTCCTGGGGG  
ATGGAAAGAGAGCCAGGCTTCCT

>323

GGAGAAAAATCGTATTGCCGCCCAGAAGAGCCGACAGAGGCAGACACAGAAGGCCG  
ACACCCTGCACCTGGTAAGTGTTGAGATCAATCAACATCCACGTGAGCTTTAGGCTTTG  
CCCTCCGCCATCTGGGAACCCTTGG

>324

CTCTTAGCGGCCACCGCCCTCCTGACGCACGGCCAAGAGGAAGGCCAAGTCGAGGGC  
CAAGACGAAGACAGTAAGTCCCAAACCTTTTGGGAGTGCAAGGATACTCTATATCGCGC  
CTTGCGCTTGGTCCCGGGGGCCGCG

>325

GAGACCAAGAACTGCCCCGGCGCCGAAGTCCCCGAGGGCGAGTGCTGTCCCGTCTGC  
CCCGACGGCTCAGGTGCGGCTGCGCTCGGGGCCTGGGGCCTGGGGCTGGGGCTGGGG  
GTGGTCGGCGCTCGCTGGCCCTCCGT

>326

CCCTGGACAGCCTGGACTTCCCGGACCCCCCGGACCCCCCGGACCTCCCGGACCCCCCT  
GGCCTCGGAGGAGTAAGTGGAGAGGCCTTGTGTGTCCACTCTCCCCTGTTTTGTTTTT  
GTTTTTTGGCAGATGACATAATT

>327

CTTTGCTCCCCAGCTGTCTTATGGCTATGATGAGAAATCAACCGGAGGAATTTCCGTGC  
CTGGCCCCATGGTGAGCCAGCAGGGGGAGCATGGATGACAGAAGAGAGAATGGGTAT  
CCAGAGGATGTGGGCATACGCGGC

>328

CTCTGAAGGTCCCCAGGGTGTGCGTGGTGAGCCTGGCCCCCCTGGCCCTGCTGGTGCT  
GCTGGCCCTGCTGTAAGTGTCCCCGACTCAGTGTCCTTTGCCACTTTCTAACCTCAG  
AGTCCTTGCTGTTGCTGACACT

>329

CTTCCCTGGTGCCCGAGGCCCTCTGGACCCCAGGGCCCCGGCGGCCCTCCTGGTCCC

AAGGGTAACAGCGTGAGTACCAAACCTCTCCCTTCTGCCCACCCCATGCACTGGCTCCA  
GTGCGGCTCTCATCTGGGGAGCAG

>330

AGAGGAAGGAAAGCGAGGAGCTCGAGGTGAACCCGGACCCACTGGCCTGCCCCGAC  
CCCCTGGCGAGCGTGTAAGTGTCCCTGCCCCGCCCCCTCCCACTCCACCCTCATTGCCTG  
GCTGGTGCCTGTGTGTCGCGGAGTT

>331

CCCCGCTGGCCCCAAAGGATCTCCTGGTGAAGCTGGTCGTCCCGGTGAAGCTGGTCTG  
CCTGGTGCCAAGGTGAGGCCCCAGGCTTTCAGCCTGGCTTGGCCAGGCCCTGACCATC  
CCGTGTAGGGTCTGGGATGAGGCG

>332

ACCCCCAGGCCACCTGGTGCCCGTGGTCAGGCTGGTGTGATGGGATTCCCTGGACCT  
AAAGGTGCTGCTGTGAGTATTAAGTGAGGATCCATGAAGAGCCAGGGACAAACACAC  
CTGAGACTTGAAGGAGTCCTGGGCT

>333

TGTGCAAGGTCCCCCTGGTCCTGCTGGTCCCCGAGGGGCCAACGGTGCTCCCGGCAA  
CGATGGTGCTAAGGTGAGGGCAGCGTGGAAGGGGCTCTGGCAAGTGGCCCAGGGACC  
AGGTCTCACCCCTCCTGCAGCAGGGG

>334

CGCCCCCTGGCCTTCAGGGAATGCCTGGTGAACGTGGTGCAGCTGGTCTTCCAGGGCCT  
AAGGGTGACAGAGTAAGTTCAACCTTCCCCCTCCCCTGAGCCCTACATGGCTCCCATC  
TCTGCCTGCTTTGAATCTCTCAGC

>335

CAAAGATGGCGTCCGTGGTCTGACCGGCCCCATTGGTCCTCCTGGCCCTGCTGGTGCC  
CCTGGTGACAAGGTGAGGTGGCCGCCTCCCCACCTTCTGCCCTAACACATAGCCTCCT  
CAGCAGGCCTGGGCACGGTTCCGT

>336

TGATGCTGGTGCTAAAGGCGATGCTGGTCCCCCTGGCCCTGCCGGACCCGCTGGACCC  
CCTGGCCCCATTGTGAGTGGCTTGGCCCTCTGTGCCACGAGGCTGGTGGGCTGGGAC  
CCAGGACGGGTCCAGGCTTGATGC

>337

TGAAGTTGGTCCCCCTGGTCCCCCTGGCCCTGCTGGCGAGAAAGGATCCCCTGGTGCT  
GATGGTCTGCTGTAAGTGCCAGCTCAGATCTCTGCAGCTCCGGAGGTGTGCAGAGCT  
GGGGAGGGGTCCCTGTGCTGCTGT

>338

ACAGCGTGGTGTGGTCGGCCTGCCTGGTCAGAGAGGAGAGAGAGGCTTCCCTGGTCT  
TCCTGGCCCCCTCTGTAAGTGCCCCCTCACCTTGGGGGGCCCTGAGAAAAACCATCAC  
AGGACTTGGAGTGGGGCGGAGCCAA

>339

TGAACGTGGTCCCCCTGGTCCCATGGGCCCCCTGGATTGGCTGGACCCCCTGGTGAA  
TCTGGACGTGAGGTGAGCAGTCCCCAGCCCCCATGCCAGTACCCTCAGCATGGCCATT  
GTGGCCTTGCCTAAGCCCTCTTCC

>340

TGCTCCTGGTGCTCCTGGTGCCCCTGGCCCCGTTGGCCCTGCTGGCAAGAGTGGTGAT

CGTGGTGAGACTGTAAGTAGCTGGGCTCCAGTTCCCTGTACCTGGTCAGGCCAGGGAC  
TCTTCAGGCCTCCTTAGAGGCCTG

>341

CGAACAGGGCGACAGAGGCATAAAGGGTCACCGTGGCTTCTCTGGCCTCCAGGGTCC  
CCCTGGCCCTCCTGTAAGTATGCTCAGCCCCTCCCCAGTCCCCATGCTGTGCTGTGGGA  
TAGGAGGGGGAGCTTCGCCTCAGT

>342

ACTCAACGGTCTCCCTGGCCCCATTGGGCCCCCTGGTCCTCGCGGTTCGCACTGGTGAT  
GCTGGTCTGTGTATGTAGCCCCTCATCCCCTCTGCTCATGGCCCTCCAGCCCCCATAG  
CACTTGGATGCCGGAATCCCCA

>343

GAGGGAAGCCGCAAGAACCCCGCCCCGCACCTGCCGTGACCTCAAGATGTGCCACTCT  
GACTGGAAGAGTGGTGTGGGCCTGCCCTAGCCTCTCCCTCCCTCCTACTCCTGCCATGC  
CAGGGTCCCCATGCCCATATGTGC

>344

GTACATCAGCAAGAACCCCAAGGACAAGAGGCATGTCTGGTTCGGCGAGAGCATGAC  
CGATGGATTCCAGGTGCGTGAGCTGGACCTCAGAGCCAGTGTTAGGAGATGGGCTAGC  
CCAGTGCTCAGAAGGGACATGAAGT

>345

CAACGAGATCGAGATCCGCGCCGAGGGCAACAGCCGCTTCACCTACAGCGTCACTGTC  
GATGGCTGCACGGTGAGTGCCAGAATCCCCAGGCAGGGCCCCACCTCTCCGGCCTTG  
GGCATTTTGGCCAGGCCATAGTGC

>346

CGCCGCTACGGCCTCCCCCGCAGCCTCCTTGTTCTCCTCCAGGTGGTAGTGCTCGCTC  
TGGCGCAGATTGTAAGTTTCGAGCCCCCTCCGCTGCCAGGGTCCAGGGTGCGGGGTCT  
GGAGTCCGGGATGGAGGAGCTCT

>347

TCCACCGGGAGAGCGGGGCCCCCGGGTCCCCCGGGACCGCCGGGAGTGCCTGGATC  
CGACGGCATCGACGTAAGTCTCTAACCTGAGACCAGGGCGGGAGGGAGGCGGCAGAC  
AAAGGAGAACTTTGTGAGCGCTGTGG

>348

TCCCCCGGCCCTCGAGGACTGGCCGGGAACCGAGGCGTGCCAGGACAGCCCCGGGAG  
ACAGGGCGTGAGGTGAGTCGGGCCCCGGGGTAGGAGGTGCTTCTTCTAGGTAGATCT  
GTTCTGGGGTGCGGCTTACCCGCCA

>349

CACCCTGGCCCTCGGGGCGTTCTTGGCATCGTGGGAGCCGTGGGTGAGATCGGCAACA  
CGGGGCCCAAGGGTGAGTGCTCCTCTGCGGTGGGCATGGGGGCCAGGCAGTGAGGAT  
TTGTCCAGGCCGGCCCTTTCCCCAT

>350

GGAGAGAAGGGTGATCCAGGAGAAGTGGGACGGGGGCACCCCGGGATGCCTGGGCC  
CCCAGGGATCCAGGTAAGCCATTGGCCCTGCCAGCTGCAGTGTGTTCTCAGCTTG  
GGAATTAATGACGTGTGGACACTGCG

>351

GGCTGGCACAGCTGCCTGCATCGCAGATCTCATCACCTTTCTCTGGATACTGCTAAAG



TCCGGTTACAGGTGAGGGGATGAAGCCTGGGAGTCTTGATGGTGTCTACTCTGTTCCC  
TCCCCAAAGACACAGACCCCTCA

>352

ATGAGCTTTGCCTCTGTCCGCATCGGCCTGTATGATTCTGTCAAACAGTTCTACACCAA  
GGGCTCTGAGCGTGAGTATGGAGCAAGGGTGTAGGCCCTTGGCCCTTTTTCTCAGT  
GATGATTGATCTTAGTTCATTCA

>353

AGATACCAAAGCACCGTCAATGCCTACAAGACCATTGCCCCGAGAGGAAGGGTTCCGG  
GGCCTCTGGAAAGGTGTGTACCAGTTGTTTTCCCTTCCCCTTTTCCTCCTCCCCGATAC  
TCTGGTCTCACCCAGGATCTTCCT

>354

GTCAACTGTGCTGAGCTGGTGACCTATGACCTCATCAAGGATGCCCTCCTGAAAGCCA  
ACCTCATGACAGGTGAGTCATGAGGTAGACGGTGCTGGGTCTCACCTTCCCCCATGC  
CAGGAGCAGGTGCGGGGGTCTAGC

>355

AGTACAGTAGCGCTGGCCACTGTGCCCTTACCATGCTCCAGAAGGAGGGGGCCCCGAGC  
CTTCTACAAAGGGTGAGCCTCTGGTTCTCCCCACCCAGTTCAGGCCTCTTGGCTATGC  
ATGTCTATTGTGGGTGGGAGAGA

>356

CCGCCCCCAATTCCCTGCCCTATTCTCTGCCTGGGAGATGGCTTCCCCGAGCCCCCGC  
CGGAGTCGAAGGTAAGTAAGCACCCCCCGGGATCCCGGTTGTCTCGCCGCTACCCC  
AGCTAGGCCGCACCACTGCTTTC

>357

CTCCAGGTGAAGCACCATTTTTGACCTTCCCTTGTGTCTTCTGTTCTTGGCACAGTGCC  
TGGACCCCAAGGTACACGCTTAGAGAACCTCAAGGAATTGAATTGAATAGAGTCACAA  
GCCAGTGCAAATGGAAAATTGAA

>358

CTGGACCCAGCTCAGAGAAGCCTGTATAAAGATGTCATGATGGAGAATTATGGAAACC  
TGGTCTCACTGGGTAAGAATCTGCTGTTTCTCTAATTAAAATATCTAAGAAGGTAGAGA  
GAAATCAGACTAACAGAACATTT

>359

AGCCGCACTCGCCGATCCTCCAGGCATGCCCCGCTACGAGCTGGCTTTAATCCTGAAA  
GCCATGCAGCGGGTAAGTGACCTTCCCTCAGAGCCGGTTTTCCCGCGCGGGCGCCCC  
TGTGCTTGTCATGACCCCTATATT

>360

TCTACTTAACCCCAACCACAGATCTACCCTGTGACTCAGCCACTTGCCCCAGTTCATA  
ACCCCATTAGTGTAAGTCCAAATTTACTGGCTTTGCTGTTTCATTCAAGATGTGTATGTG  
ATGGTAGAATAAAAGAATAAA

>361

ACGGACGAGGGCGCGCTGCATGGCGCGGCTGAGGCCAATTTCCGCATCTACCCCTGGA  
TGCGGTCTTCAGGTAGGCGCAGTCGCTAGGCGGGCCAGGCTGGCGGAGCGGGACCGG  
GAGCGGGGAGCGCAGCGCTGGGGAG

>362

GGCTGGTACCCTGGAGGAAAGCGAGCCCTCAGCTCAGCCCAGGATCCCCAGAATGCC

CTTAGGCCCCCAGGTGGGTGTCTCCCAGCCTCATGGGGAGGAAGAAAGTGATGGCCG  
GGGGCTCCCCCACCTCCTGGAGCCT

>363

GCCCTGGGAGGGCAGGACCACGGCCCAGTGGTCCCTTCACAGGAAGCGACACCTGGC  
ACGGACACTGCTGGTGAGTAGGGTGAGAGGTCCCCAGCATCAAGACCAGCCACTGGT  
CATCAGAGGCCATTGTGGCTTAGGGT

>364

CAGTCTCTTAAACAAAAGCAAAAGAATAAGCTTCGGGCGCTGTAGTACCTGCCAGCTT  
TCGCCACAGGAGGTAAGTGGATCTGGGAGCTGGGGGAAGTGAAGACTAGCCAGAT  
ATTACATGTATTGCCAACTCAAAAC

>365

TTGGATATCACTGATCCCCAGAGCGTCCAGCAGGCAGCCAAGTGGGTGGAGATGCACG  
TTAAGGAAGCAGGTAAGTATGGTAGACCACCAGGAATATGGTGTGGGGTGTCTGATC  
CCCACAGTCACCCCAGGAGTCACC

>366

GCCTGGCAGCCAATGGTGGGGGCTACTGTGTCTCCAAATTTGGCCTGGAGGCCTTCTC  
TGACAGCCTGAGGTGAGGGGTACAGGGCTCTGGGTTCCAGGACTAACAGCAGCCCAC  
TCAACAAACGTGGGCCAGCAGAGGT

>367

CTGCAGGCCTGCTGGGCACGGCTGCCTCCTGCCACACAGGCCCACTATGGGGGGGCCT  
TCCTCACCAAGTGTGAGTAGCCAGGCCACACAGGGGCACATGAAGGGAAACAAGTA  
CCAGAAAGGCCAGTCCTGCATAAGC

>368

GCGGTGGAAGACCAAGCAGGGGGTGACGGAAGCAGCTGAGAAGACCAAGGAGG  
GGGTCAATGTATGTGGGTAAGTGGGGCATGGCAGGGTGGGACAGTGTGGTGGCCAAAG  
GGTGAGTGCCCAGTTACCTTCGCCAGAC

>369

CAACACTGTGGCCACCAAGACCGTGGAGGAGGCGGAGAACATCGCGGTACCTCCGG  
GGTGGTGCGCAAGGTGAGCCCCGGCCCTCAGACCTGCCAGTCCTCTCCTGGGCCCCA  
GAAAGGCTGCTGGGCGGAGGCGGCAT

>370

GGACTTGAGGCCATCTGCCCCCAACAGGAGGGTGTGGCATCCAAAGAGAAAGAGGA  
AGTGGCAGAGGAGGTAGGAGCTGGGCTCCTGGGGTGCACCATGGGGGGTTCTTGTT  
AGGGACCCCATCCCCACAGACGCAC

>371

TGGATGTGGAATATAATTGAATATTTTCTTGTTTAAGGGGAGCATGAAGAGGTGTTGAG  
GTTATGTCAAGGTAAACAAAACCACCATTTGTGGTAAAGACCACCAGGAGGGATAACTG  
AATATATGGCTTACAAAATGTTT

>372

CTATGAAGGCATTGTCGTTGCAATCGACCCCAATGTGCCAGAAGATGAAACACTCATTC  
AACAAATAAAGGTAAGTTCATAGTAATTATCCATACTTTTTTAAAAATAGCATAATGTTG  
TGATAGAGAGAACATGAGTGC

>373

CATTTTGATTCTGAAACATGGAAGACAAAGGCTGACTATGTGAGACCAAAACTTGAG

ACCTACAAAAATGTGAGAATATCAAGTTCTTCTTTAAAATTCCACTTTCTCCTGTAACC  
AAGATTTTTTTAAAATCAAAATAT

>374

AAGGGTGAAAGGATCCACCTCACTCCTGATTTTCATTGCAGGAAAAAAGTTAGCTGAAT  
ATGGACCACAAGGTAAGAAATATTCTACCATACTTCTCATACAATTAACTATTTTATGTT  
CAAAGTGTATCAACACTAGCA

>375

GGGGAGTATTTGACGAGTACAATAATGATGAGAAATTCTACTTATCCAATGGAAGAATA  
CAAGCAGTAAGGTATGTATATTTTGATTAACTTGTTCCAAACATTTTAAATTGCAACC  
TTTTTTTCTTGAATTGATTAC

>376

ATGTGAGTTTGTCTCCAATCCCGCCAGACGGAGAAGGCTTCTATAATGTTTGCACAAC  
ATGTTGATTCTGTAAGTACCTTGTCTCACCCCTCCCCCAGATTCTTATGAATTTAGTG  
AGGCTTTTACTCCAAGTGCTC

>377

CACCTTCTCATTGCTGCAGATTGGACAAAGAATTGTGTGTTTAGTCCTTGACAAATCTG  
GAAGCATGGCGGTATGTTCAATGAGTCTTGGTCTTCTGGATGCTGGTCACAGATATGCA  
TGTTCTGGACCCTGACTCGGAA

>378

CGCCAAAAGATTACCTGCAGCAGCTTCAGGAGGGACGTCCATCTGCAGCGGGCTTCGA  
TCGGCATTTACTGTGAGATGTGTTTTTCTATTGTAGTTTGGAATGTTTGCAATTTATGTG  
CTTAACAAACTTCCATTTCCA

>379

GCCATCATCCACACAGTCGCTTTGGGGCCCTCTGCAGCTCAAGAACTAGAGGAGCTGT  
CCAAAATGACAGGTGAGGGATGATTTGCTGAGACCCCCGGTATTGTCTCTCCTACTGG  
ACTGTGAGCTCCAGTGAAGTGGG

>380

CAATGGCCTCATTGATGCTTTTGGGGCCCTTTCATCAGGAAATGGAGCTGTCTCTCAGC  
GCTCCATCCAGGTGGAGTTCTTAATCTTTGGTTTTTCATATTACACATAATCATAGCCA  
AGATGGAGAATTTAATGGCT

>381

GAAGCAAGGTGGCTTTGTAGTGGACAAAAACACCAAAATGGCCTACCTCCAAATCCC  
AGGCATTGCTAAGGTATGGAGTCAGCTTTTTTCTTTCTCATAATTCAACAAGATAAAAT  
AAAGTTTTTACAGAATAATTGTA

>382

AGTGTACAGCCCTGATTGAATCAGTGAATGGAAAAACAGTTACCTTGGAAGTACTGG  
ATAATGGAGCAGGTAATCACCCAAGAAATTGGAAGATATTTATTTCTTTTTCCAAGAAG  
CAACCAGGGAATGCCAAGAGGGC

>383

AACGCAGCCAGACGGAGAGTGATACCCAGCAGAGTGGAGCACTGTACATACCTGGC  
TGGATTGAGAATGGTAAGTAATTTGTAATAACATACCTGGCTTGTGCAAAAGCATTGGT  
TTCAAGAGGAACTATTAAGCCTG

>384

GAAATTCACGGGGGCAGTCTCATTAACTGACTTGGACAGCTCCTGGGGATGATTATGA

CCATGGAACAGGTAAGCTGAACTGGTGTGGACCTGTAAAAGATTTACCAGCCAAGTAG  
AAGAGCAGAAGCGGGTGAGGCAG

>385

GTCTCCGAGGCTGCCCTGTCTCTCCTTGTCTCATCCTTATCATTACTTCGGCTTCTCGC  
AGCCAGCCAAGTGAGTCCACTTGTCTCTGTAGGGCAGGAACGAGAAAGGGGGATGGA  
GCAGCTGGCAGGGAGGTAGTGCC

>386

AGAAAGTGTTGCCAAGGAGACTAGTGGTGGGATACAGAAAGGCCCTCAACTGTCACC  
TGCCAGCAATCATGTAAGCACGTCCTTTTAGATATTTCTGTGGAGAGGGACAGGGAGC  
CCAGGGGCAGGAATGAGATACATGG

>387

AGTCAGCTTGCCGCCGGCGGCCAAGCAGCCAACCATGCTCAACTTCGGTGCCTCTCTC  
CAGCAGACTGCGGTAAGTCATTTGGGGATGCCCCCTGTGCTTCCTCGCCTGGTCTTGTCT  
GGGGGGCCAAAGGGGGCGCGAAC

>388

TTTTTACACAATCTCTACTTTGACCAAACGAGTCTGGACAGTTTTCTTTAATGGAAAAT  
AGGAGAAATGGTGAGTAGTACCATTTTTTTTTTAGCGTAGTTCAAAGAACTTTACTATAA  
AACATTAGGTAGTTCTACAAA

>389

AGTATCTGATTTGTCAGAGGAAGAGAATCTGCTTCCGGGAACACCTGATTTTCATACAA  
TCCCAGCATTTGTAAGTATTATTGTTTTTAAGATAGACGTAAATTATATAATTTCTTAAAA  
TTTATATAATAAACTGTAGA

>390

AGCCACCCAGGATGTGGCAAGACATACTTTAAAAGTTCCCATCTGAAGGCCACACGA  
GGACGCACACAGGTACCAGCCACTTCTTATATCTTTAGTGTTTAAATGAAGAGATTTTG  
GCTGTGATCACACATTTAAACCC

>391

GATCGTCAGCCTCGCAGTGGCCGACCTCCTCGTCGCCACACTGGTCATGCCCTGGGTT  
GTCTACCTGGAGGTAGGTGGGCCCCCTGCTTGCTCCAGCACTTTCTCCAGCAGGGCCC  
TGC ACTGGACACTGGGGACTCTAG

>392

TCTTCGTCACTCTGGACGTCATGATGTGCACGGCGAGCATCCTGAACTTGTGTGCCATC  
AGCATCGACAGGTGAGCCCAGCCAGGGTGGAAGAGGTTGCTCTGGCCACTCACCATTT  
CTGGCTGCCCCAGCTTTTCTCAA

>393

ATGATCTCCATCGTCTGGGTCTGTCTTCACCATCTCCTGCCCACTCCTCTTCGGACTC  
AATAACGCAGGTACATTCTGCTTTTGTTCCTGAGGCTCAGCTGGCCCTGGGCCCCCTG  
CTCCCTCGAAGGGCCCTGAGG

>394

ACGCCGCAAGCGAGTCAACACCAAACGCAGCAGCCGAGCTTTCAGGGCCCACCTGAG  
GGCTCCACTAAAGGTCTCAAGACACCCCCCAACCAACTCCAAGGGTCCCCACCTAACC  
ATTACCAAGAGGGCTCATCTTATGC

>395

CGAGGACATGAAACTCTGCACCGTTATCATGAAGTCTAATGGGAGTTTCCCAGTGAAC

AGGCGGAGAGTGGTAAGTGCTCAGGCCAGGACCCAGAGCCAGGTCTTTCTGCCCCTA  
GGGAAGCCCCTGGCCATGGTTCTG

>396

ACCATGAGCCGTAGGAAGCTCTCCCAGCAGAAGGAGAAGAAAGCCACTCAGATGCTC  
GCCATTGTTCTCGGTGAGTCGGCCCTGGCTGCTGGCCACAGCCCCGGTCTGTGAAAGGT  
CCCATTCCCTGCCATGTCCTTCCTA

>397

CAGCATTTTCATCTGCTATGGCCATGGTTTTTTCTGGGGACCAGAGGTAACACGGCAGCAC  
AGCTGTCCAAGGTCAGCAGAAACAAAAAAGGGTCTGCTTTCTCCCATCTCCCTAC  
GAATGGACAGTCTGCATGGAAAG

>398

ACGTGGAGCGTCTTATATTCTGAAACTTGCTAATAGATTATATGGAGAGAAAACCTTACAA  
TTTCCTTCCTGTAAGTACTTTGCCCTTCACATTCTAAAACCCCACTAGACAGTGCAGATA  
TTTTCCAGCACAAATCAAGTC

>399

GTGGATTTTCAGCATGCCTCTGAAGATGCAAGGAAGACCATAAACCAAGTGGGTCAAAG  
GACAGACAGAAGGTGAGAGCCTGGGCAGAATGGAATCATTATGCGCTGGTCATGTCAT  
TCGTTTCCTCAGTCCGCCTTCCCT

>400

TTTCAAGGGAAACTGGAAGGATAAATTCATGAAAGAAGCCACGACGAATGCACCATTC  
AGATTGAATAAGGTGAGGTGAGGTAACTGTACAGAGTCATGCATTGCTCTAAAAGAAT  
GCAGAGAATAATTCAGTGATTTT

>401

AGGCGAGGAGCTCAGCATGGTCATCCTGCTGCCGGATGACATTGAGGACGAGTCCACG  
GGCCTGAAGAAGGTATGGCTCCTGGGCTTCATGCTTTGTGGTTCCTCTTGCATGTGTGT  
GTCGCATGGTAGGTAGGTGCTTG

>402

CACCTCTCCGCCGCCTCTGGCGCCCGGGCTCTGGCGAAGCTGCTGCCGCTGCTGATGG  
CGCAACTCTGGGGTAAGGTGGGGGACAGGGGGCGGGGAGAGGCGCCGGTGGGAGGC  
ACGGGCGGGAGGGCAATGTGTTCCCG

>403

TCTCGTTCCACTGCGCGGGTGTCTTGGTGGACCAGAGTTGGGTGCTGACGGCCGCGCA  
CTGCGGAAACAAGTAGGAGGAGATCCATCCCCGAGGACGCCACGGGGGGCTGTGGAG  
GCGGCCTCCAGGGAGGAGCGGGCAG

>404

CTTCTACCCTGGCGTGGTCACCAACAACATGATATGTGCTGGACTGGACCGGGGCCAG  
GACCCTTGCCAGGTAGGGTCTGAACAGGGAGAGTCTCTGACTCCTGGGAGGGAGGAC  
AGGGAGGTTATGGGAAAAGAGCAGA

>405

CGGTGCACTTCCTCATCTTCCTACCATGCACGCCAGCAGCTTCACGCTGGCCGCCGTC  
TCCCTGGACAGGTGAGCCAGCGCCTTGGCCTCCCTGGGAGATGGGCATCCACGCGGG  
GGATGGAGCGGGAGGCGGGACTGG

>406

GCTCCCGCCGGCACCATGGCCAAGACCGTGGCCTATTTCTACGACCCCGACGTGGGCA

ACTTCCACTACGGTGAGGAAACAGGGCTATGCATGAGGGGTGGGACACGGAGGTTTT  
GAGGCGGGGTGCAACTCCAGGGG

>407

TATGAAGCCTCATCGCCTGGCATTGACCCATAGCCTGGTCCTGCATTACGGTCTCTATAA  
GAAGATGATCGTGAGTTCCGCCGCCTCGGCCGGGGGTGGGGGGTGGGGCGAGCTGT  
GGCCGTAGGGATAGGTGGGCTGG

>408

AGAGAGTCAGCCCCACCAATATGCAAGGCTTCACCAAGAGTCTTAATGCCTTCAACGT  
AGGCGATGACTGGTGAGGGAGGACTGGGAGTTTTGATGTCTAACAGTTTAATGCCAAG  
CCCTTCAGTGAGGTCTTTTGGCAG

>409

CGGGCTCTTTGAGTTCTGCTCGCGTTACACAGGCGCATCTCTGCAAGGAGCAACCCAG  
CTGAACAACAAGGTGACATAGTCCCGAGTCTGTCTTCCTTTCCTCTGGATCCCTGGA  
CTCGGGATTAAACCCTGATCCTG

>410

TTCTACCTCACTGACCGGGTCATGACGGTGTCTTCCACAAATACGGAAATTACTTCTT  
CCCTGGCACAGGTATGGGAATAGGGATTACTTTCCCTTTGCACCCTTCAGCTCTTTACT  
ATGAGTGCCTCCTTCTCAGCC

>411

GAAGTCGGGGCAGAGAGTGGCCGCTACTACTGTCTGAACGTGCCCCCTGCGGGATGGC  
ATTGATGACCAGAGTAAGTACCGAAGTCTTCCCTCTGTTCCCTAGGCCCTTCTTTTTCT  
CCTTGAAATAACCTCTTCTGCCT

>412

CAAGCACCTTTTCCAGCCGGTTATCAACCAGGTAGTGGACTTCTACCAACCCACGTGC  
ATTGTGCTCCAGGTAATACTGTCAGTTCCTCCTCAGGAGTGTTCTGCCTGGGCTTGGGG  
AAAGAGAGCAAGGGAAGAGGAGG

>413

AGAGCTTCAATATCCCTCTACTCGTGCTGGGTGGTGGTGGTTATACTGTCCGAAATGTT  
GCCCCTGCTGGTGAGCACTCTCCTGATTTCTTCCCTGTTGTCCAGTGTGAGCTAGGG  
TGTCCCTCAGATATGGCCACAT

>414

GTACTTTGCCCCAGACTTCACACTTCATCCAGATGTCAGCACCCGCATCGAGAATCAGA  
ACTCACGCCAGGTGAGCAGCTCAGAAAAGCTGAGCACAACTTCTCCTGAAAGGTGG  
AGCCCAGGAGAGGTCAAAGATGTG

>415

ACCTCCTGACCTATGACAGGACTGATGAGGCTGATGCAGAGGAGAGGGGTCCTGAGG  
AGAACTATAGCAGGTCTGGGAGCAGGGACTTCAGCCTACTTTCAATAGGCTTGCTGGG  
GAGGTTTAAAAGGGAAAAAGTAAAT

>416

GGACCATCGGAGAGCAGTGCAGCGTGTGTGGGGTCGAGCTTCCTGATAACGAGGCTG  
TGGAGCAGCACAGGTAGGCCCGCTCCAGCCCCGCACCTGATGTAGGACTTGAGGCC  
CTCACACCCCTCCTTCACACCCTGGC

>417

GGGTGCGAGCTCTGCGGGAAGCGGTTCTTGATAGTTTGCGGCTGAGAATGCACTTAC

TGGCTCATTAGGTAGGCAAGTTCGCCTTAGTGGCCCGTTCAGATACAGGCAACCATCT  
CCTGCTTGCCTTTACCCCTCCTC

>418

GTCTGTGATCAGTGCGGTGACAGTTTTTCGAAGGAGGATGCCCTGGAGACACACAGG  
CAGACCCATACTGGTGAGTTGACTTGGATTCTGTTCTCCAGGTTTTCCACAGTGTTGG  
TAGCACATGGACATGAACTGTCTG

>419

ATCTGCAGTGAGTGCAACCGCACCTTCCCCAGCCACACGGCTCTCAAACGCCACCTGC  
GCTCACATACAGGTAGGTCAGTCCAGCTGATGGGTGGATCTGGGTCTCTGGGAGCCAG  
CGTCTATATTTACCTCCAAGGACG

>420

GAGTGCAATGGCTGTGGCAAGAAGTTCAGCCTCAAGCATCAGCTGGAGACGCACTATA  
GGGTGCACACAGGTACCGAAGGCCAGGGAGGGGCCTGAGCTGGCTCTGGGACCTGGG  
CGGAGGTGGGAAGCAGATAGTCTCC

>421

TGGGTGTGAGGGACACATACATCCTAAAAGCACCCACAGCAGAGGAGGCCAGGCAGT  
GCCAGGAGTCAAGGTGAGTGCACGACCTGACTGTGTACCAAGGGCCGTACCCCCAGA  
AACAGTGTGACACCTGGCAGCACCGG

>422

CTGTGAGGCCCTAGAGCACACCTTAAGAGAAGAAGAGCTGTAAGCCGGCCTTTGTC  
AGAGCCATCATGGGTGAGTTTCTCAGCTGAGGCCACTGGCACTGTCCCTCTCTCCCTC  
AGTCCTGTGGGATCCCATCATACT

>423

GGAGAACAACAAACCCCGGAGCCGGAGCCAGGGGAGGCTGGACGGGACGGGATGGG  
CGACAGCGGGCGGGGTGAGTGCCCCAGCAGAAGGGCAGGCGAGCCATGGACCGCTTT  
ATCTGCGACCCCTCCCCACACCCTCC

>424

TTCCATGGGGTCCCCCTGGTCTGCCCCCTCCAGCTCCCCCAGGATTCTCCGGGCCTGTCA  
GCAGCCCCCAGGTGAGAGGTTGTGACCAACTTACTGCCTGGCCACTTTCATTTTCTTGT  
TTTCCTTGTAACCCCAGATCCT

>425

TGTCCACCCCCTCCAGGTGGCCCTGGGGCTGGCAAACGGCTATGTGCAATCTGCGGGG  
ACAGAAGCTCAGGTATGTGGCTCAGAGGATGAACAGATAGGGAGAGTCTGGGCCATGT  
ATCATCACCTGTGGGATTCCCAGG

>426

AAGCGCCAGCGGAACCGCTGTCAGTACTGCCGCTATCAGAAGTGCCTGGCCACTGGCA  
TGAAGAGGGAGGGTAAGGACGAGTCCTGTCCACGCGTCTTAGACCACGTTCACAGAC  
TCCCTATACGCCACTCGGACTGTGT

>427

GCTTGCTGTGGAACAGAAGAGTGACCAGGGCGTTGAGGGTCCTGGGGGAACCGGGG  
GTAGCGGCAGCAGCGTGAGTGTTGGGGTCAATCCACTCTCCTTCGTGATGGGGGTTGG  
GGGAGGCAGTCTAGGTCTGTAAACA

>428

GAGTGGGCGAAGAGGATCCCACACTTTTCCTCCTTGCCCTCTGGATGATCAGGTCATATT

GCTGCGGGCAGGTCAGTGACCTTGGATCCCTTTGACTTCTTGACATTTGACCCCTCTTT  
GACTTCCCGATCTTTAGTGACC

>429

TCCTTGCCACAGGTCTTCACGTGCACCGCAACTCAGCCCATTGAGCAGGAGTAGGAGC  
CATCTTTGATCGGTGAGTGGCCCTCGGCTAGGCTGGCATGTAGATAGAGGGGGTGGGG  
CTATAGGCTGGTCCGTGTCCAAGG

>430

AAAATGCGTGACATGAGGATGGACAAGACAGAGCTTGGCTGCCTGAGGGCAATCATTC  
TGTTTAATCCAGGTAAGAGGAGGATTACCTTTGTCTCTCAAGGCCAAGGCAACCTTGG  
AGCCTCCTCTTCTCCGAGACTCCT

>431

TCCTGCGGGAGAAAGTGTATGCATCACTGGAGACCTACTGCAAACAGAAGTACCCTGA  
GCAGCAGGGACGGTGAGATGGGGCTGGGGGGCACTGAGGCTCCCTTGGGGGTGGGG  
AGTGCTATGAGGATGTGTTTCAGGGCC

>432

CCAGGCCCCGGAGGACGAGGACTCCAGCCTGGATGAATCTGACCTCTATAGCCTGGCCC  
ATTCTACCTCGGTAAGGCCCACTCAGCCATCTCCACGGTCCCTCCTCTCCCGAAA  
TCAGGACCCACCCCTCTTGTTTC

>433

AAACTGGTGACCAAGCTGCAGAATTCAGAGAGGAAGAAGCGAGGGGCACGGCGCTG  
AGACAGAGCTGGAGGTAAGGAGTCGGGGGGGCCAGAGAGCTCAAGGTGGTGCTTCTG  
CCATGAAGGACAGGCCGGAAGGTGTGT

>434

CACCATGGGGCGCCTGCAACTGGTTGTGTTGGGCCTCACCTGCTGCTGGGCAGTGGCG  
AGTGCCGCGAAGGTAAGAGCCCAGCAGAGGGGCAGGTCCTGCTGCTCTCTCGCTCAA  
TCAGATCTGGAAACTTCGGGCCAGG

>435

ATCGTGGTCACCTTCAACTACCGTGTGCGCCCCCTTGGGTTCCCTCAGCACTGGGGACG  
CCAATCTGCCAGGTGCGTGGGTGCCTTCGGCCCTGAGGTGGGGCGACCAGCATGCTGA  
GCCCAGCAGGGAGATTTTCCTCAG

>436

CAGTGTCTGAAGGTTACTGATCCCCGAGCCCTGACGCTGGCCTATAAGGTGCCGCTGG  
CAGGCCTGGAGTGTGAGTAGCTGCTCGGGTTGGCCCATGGGGTCTCGAGGTGGGGGT  
GAGGGGGGTACTGCCAGGGAGTAC

>437

ACATGGACGGCCACATCTTCGCCAGCATCGACATGCCTGCCATCAACAAGGGCAACAA  
GAAAGTCACGGAGTAAGCAGGGGGCACAGGACTCAGGGGCGACCCGTGCGGGAGGG  
CCGCCGGGAAAGCACTGGCGAGGGGG

>438

CCCAGCCACCAATGGCTCTGAGCTGGTGACAGTACAGCTTATGGTGTCACTGGCCCAG  
CTCATCAGTGTGGTGAGTAGAGGTCCAGGCTCTCTGCCAGCTACTGAAATCAGCCC  
CGCCAAAATGTGTTAATGCTTGTG

>439

TTGACAACATGAAGAAAGTTCGGCTCCCTTCCAAACACATCTGGCTCCCAGATGTGGT



CCTGTACAACAAGTAGGTGCAATGGGAAGGTTGGGGGAGACCATTGGAGGGCTCAGG  
GAGGGAAGGGGTTCTGGGGAAAATA

>440

CCTCCGGGAGGCGGTGGACGGCGTGCGCTTCATCGCAGACCACATGCGGAGCGAGGA  
CGATGACCAGAGCGTGAGTGCCGCAGGCTGGGACCCCGGGCGTGAGATATGGGGTCT  
GCCAGGGCCCGGGTATCTGGAAAGCA

>441

GTCACTCGGCCAGAGCACTTCGACTTTGTAAAGCCTGAGGACCTGGACGGCATAGGCA  
TGGGCCGGCCTGGTGAGGGGACCCTGCCCCGAGGCCCTGGTCTCTCTGTCCACAGCCT  
ATCAGTTGCCTTCCCCCACCACAA

>442

CCAGCGCAGACTGTCCGAAGCTCTGAAAAGGCTACGTTCTGGGCCTAAGTCTAAGAAC  
TGGGTCTACAAGGTGTGTGTTGTAGGTGGGCAGCTTGGGCCTGGGAATGAGGTGGCTT  
GAGGGGCAGGGAGGGGGGCGCAGG

>443

GGAGCTGCTGGGTTCAGGCTGCTTCGGTGTGGTGCACCGAGGGCTGTGGACGCTGCC  
CAGTGGCAAGAGTGTGAGTGTCCAGGGAGCCCGCTTCATCCAGGCCAGCTGCCCCCT  
CTGTTCTTCATGCCCGCAATGCCTAA

>444

CATGATGAAC TTGGAGCACCCACACGTGCTGCGTCTGCACGGCCTTGTACTGGGCCAG  
CCTCTGCAGATGGTGAGCAGATCCAGCCGCTGGTTCCCGGGACAGCCGTGCGGCAGG  
AGCGTGGGCGGCCAGGGTCCAATGG

>445

TGGTGC GG CCTCTGGGCGGTGCCCGGGGCGCTACGTCATGGGCGGGCCCCGCCCTAT  
CCCCTACGCCTGGTGAGAGCGGGTCCGCGGGCGGTCGGGCTCTGAGCCGGGCGGATC  
CGGAGGGCAGCAGCCGAGGGGAGATC

>446

CTTGCGCTGCTGGGCCCCCACCCTGCCGACCGGCCTAGCTTTTCCACCTGGAGGGG  
CTGCTGCAAGAGGTGGGAACCCCCGACCTCACCAGATACACAGTCCCTCTTCCCTCCA  
TTCGCTCTCCAGGGTTCCATGCG

>447

TGAGGGATGTCACAGAACCAGGCGCCCTGAGGATGGAGACTGGTGACCCCATCACAG  
TCATCGAGGGCAGGTGACAGTCCCATACTCCCAAGCACCTCAGGAGGAGGATACCC  
TCCAGCCTAATTCTGATCCCTTC

>448

TGCCAGCCACCCGTCCAGTCCACAGAGGCACCCCTGCCCGGGGAGATCAACACCCAG  
GAAGCATAGATGGGTGAGGACCTGAAAGGGTGAGGGCAGGGGTTGGCTGGGAGAACT  
GATGAGGTCCAGGAGCTTCTCTGGAA

>449

AAGGCAAATCTTTGGGATGCGCCCCCAGCACGGGGCCAGAGGAGGAACATGCCCCTG  
GAGAGGATGAAAGGTGGGTGTGGTGGACTCCAGAGTCTCTGAGGAGATCAAGACCAG  
TCCTTCAATTCCGACCCCCTGCCCTA

>450

AGCCCGTAAAGCCGCTGCCCTCTCTGGAGGCCTCTTGTCCGATCCTGAGTTGCAGAGG

AAGATTATGGAGGTGAGGTCTCACTGAAATGGCCTGGTGTCCAGAAGGGGCTACAGGC  
AGGGGCAGGGGCCTGAGTGAGGCT

>451

CCACCAGGAGTGCCAGACAGCACTAGGAGCCACTGGGGGAGATGTGGTTTCTGCCAT  
CCGGAACCTCAAGGTAAAGCCAGCCCCCTTCTCTTGGGGTCCCTCCTCTCCTGCCCTG  
CCGCCTGGCAGTCAGCTGCAACCCA

>452

GCTCACACAGCTCCTCCTCAGGCAACGGCAAGGACTCAGCCCTGCTGGAGACCACTG  
AGAGCAGCAAGAGGTGTGTATGGATGTGTATGTTGGGTCTAGGAATGGTCTTGTGAGC  
AGGCAGAGCTGGGTGACAGGCCTCG

>453

GCAGTTCCATTGCCTACAGCCTCCTGAGTGCCAGCTCAGAGCAGGACAACCCGTCCAC  
CAGTGGCTGCAGGTACGTGCGGTGAGGCTGGAGGAGAGGTCTGGGGGCCAGGCCAC  
ACTCTGGGACTAATGTCTTTATCTC

>454

CGGGGCAAGGGCCGCTCTGGGACCCTGGCCACGCTGCAGTACGCACTGGCCTGTGTC  
AAGCAGGTGCAGGGTAAGTGGTGTGTCCCAAGAGGGAATGGCCTGGGCCTGGGCTCC  
CGTGTTGAGGCAGCCTCCTTACTGAA

>455

CATGGACATGTCCACCTATAACCCTGGAGGAGCTGGAGCACATCACGTCTGAGTACACA  
CTTCAGAACCAGGTACGCGGCGGCCTGGCCTCTGCATCCCGACGCACCCCTACTCCTT  
CTCCACAGCTCTTGAATCTGCTC

>456

GATGTGGGAGTCTTCTATGGTTCCACTGCTCCATCTCGCCTGCCCACCTGGGGCACAGG  
GGCCTCAGCAGGTGAGGTGCCCAAGCGCTGTGGGGAGGCATGAGCAGTCCCAGGAAA  
TTCCTGCTGTGAGGGGCCGGGGAA

>457

GTCTCAGATGGGGCCCCTGCACAGCCGTGCTGCCTGCTGATTGCAGAGCGCATCCATT  
CGGGTTACGAAGGTGGGCAGGTACAGGGCCCTGGCCTGGTGGGGGCTGGGAGGAAGG  
ACATTTCTCATGGCCAGACATGAAT

>458

TACCCCCTGACAAGAGGATTTTCACTACGCGGCACACACCCAGCTGCCTCTTCCAGGA  
TGTGGATGAAAGGTGAGGATAGGACCTAGAGGAGACGAGGGCAGCCAGGGCTGAGG  
CCACGGCCACTCTGATGCCTCCTTCC

>459

CTGGGGGCCCCAGTGCTCCTGTTCTGTCCTGAGGACCGACCCCTCATGCTGGCTAT  
CCACAAGAAGAGTGAGTTCTCTCGCCCTGCTCGCCCTTCCCCTGTCTGCTGGGCTTTT  
GAGTGGCTGCCCTTGTGGTTGTG

>460

GCTGGGCTGGCTTTGTGCACCCCTGGAGCCGCAAGGTAGCCTTCGTGTTGGGCCGCCA  
CAAAGTACGCACGTAAGTGGGCCATGCCCCCGAGCTGGCGTTGGGGATAGGGCAGTG  
CGGTGGGGGACAGGACCGGGCCAGG

>461

CAGCCCAGCTCCCTCCCTGGACACTGATATCCAGGAGCTGTCAGAGCAGATCCACCGG

CTGCTGCTGCAGGTGAGAGTAGCGGAGAGGGAGCCTGGGAGGTGAGAAAAGGTGTG  
GGAAGCGGGGTCAAGCCATCTAACCT

>462

TCTCCACAGCCCTGGGTCTCCAGTGATAGCAACGGGGGTGATGCAGAGGGGCCTGG  
GCCTCCTGCGCCAGTGAGTGACCTGCTCCTACCTACCCTCTAATCGCCCTTTCCCCTCT  
CCTTCTTGGAACCAGCACTGCCAG

>463

GTGAAGCACCAGGGCCAGCAGCTTTTTATTGAGTCTCGGGCCCGGCCTCAGTCCCGGC  
CCCGCCTCCCTGGTGAGTTGATGATGATGTGTGGGTGAAGAGACAGACCTGGGGGGTC  
CCCTGACCTTCACCCCCAACCCAT

>464

AGGAGGCCGAGAGGAAAGAAGCCTCCAGCTGCTCCTACCAGCAGATCAACTGCCTGG  
ACAGCATCCTCAGGTAAGGCCTGCCAGGCATCTTCTCCACCTCGGGCTCTAACCTGC  
CCACCCAAGCCCTGCTCTGATGCC

>465

TCCGTCACCAGTCAGTGTAGCTTCAGCTCCACCATCGTCCATGTGGGAGACAAGAAGC  
CCCCGGAGTCGGGTATGGGTGTGGAATTGGGGGGCAGTGCTTGGGCTCCACCGGTCTC  
CCAGCTAGAGCTCCCTCCTGCCTT

>466

TTCCGAGACCTGGGCAGGCTGCGTGGACTCGACAGCTCTTCCACAGCTCCCTCAGCCC  
TTGGCGAGCGAGGTAGCCACCTGGGGCCTCCTGGAGCCTGCCCTCTGCCCAGTCTAGG  
ACTGGATTGTTGGGGGGTGGGTCT

>467

AGGAGGCCCTGGGAGCAGTGCCGGGGCCCCACCTCCCAGTGCGGAGGCTGCTGAGCC  
AGAGGCCAGACTGGTGAGCACTGACCCCTGCGTCTGCCTGCCAGCCCCACCCCAGC  
CCCGCCCTCTGCCACCCTGTGCTGC

>468

GGCTCTGGCTTGGGCTCTGGGTCTGGTTCAGGCTCCCATGAAGGGGGCAGCACCTCAG  
CCAGCATCACTCGTGAGTACCCCGCCTCCAGCATCTCCAGGGTAGGGCAGTGATTGG  
GGAGCCGGGAGCCCAGGCCCCGTC

>469

AGGATCCCATTGCTGCTCATGGCCAATGCTGACCAGCGCGTCATGATGACCTACCAG  
GTGCCCTCCAGGTGAGGCATTTAGAGGCCTTCTTGGCCTTCCTTTCAGAGGTAGAGT  
GGGGGCAGTTTTCTTTTCTGGGG

>470

GCGGCGGGAAGTGGGTGCTGTGCACTCCTGGGTCCGGAAGGGCCAAGTGCCTCGGGC  
TCTTGATGTGATGGTGAGAGAAGCCTGGGACGGGGAGAAAAAAGAATTGAGCTCAAG  
TTCAAGGGGGAGAAAAAAGAATTGAGC

>471

AAAGTTGCTGACCTCGCCGTCCCTAAAGCCCTCTGCAGTTAGTAGTGTGACATCGTCTA  
CCTCCTTGTGAGTGAGTATCTGTGATAGCAGCCTGCCCTGCCCCACTCACAGGGGCCTT  
GGGGATGAGGTTGCTTGCCTTG

>472

GCAGGGGTCTCCAAGGATGCCATCGTCACAGGCCCTGCCCCGGGTCTTCCACCATG

GCCTTGGCCACAGTAAGTGCTTCTTTGCTGCCTCTGGTCACTCAGGAACCTCTAGATTG  
TGGCCAGGGGTCCTGCTGTTGTG

>473

TCCAGCCCGCCCCATGCAGCGCCTCTCCACACGCTGCGGTGCCACCCATATCCCGC  
AGAGTCTGCCAGGTAATCACCCGACGGTCAGTGTGCCACGCGCACCGTGTGCCTTTGC  
CCTCTCCACCCCTAGGTGCTTTGC

>474

GCTACCTGGCGGAACTGGATTCTCTCCCGCCTGCCGGCCTGCCTGCCACAGCCGGAC  
TCCGCCACTCCGGTAGGATTCCCCGCCTGTCATTCCCTAGCCCAGCTCTTGGGAAACTG  
CAGAGGGGTCCAGAGGATTTGCA

>475

GCTGCCACCTTTGGGGCCGATGACTTGGTACTGACCCTGAGCAACCCCCAGATGTCAT  
TGGAGGGTACAGGTGGGTCTCAGCGGGGTGGGATGGGGCACGGAGTGGGAGACAGAT  
CCATCTAAGGGCCTGTTAGACAAAT

>476

GCCCTTGAGGAGCTGCGTCTGGTCTTTGGGCCTCTGGGGGACCAACTCCATGCCCAGC  
TGCAGAGACCTCAGTGAGTCCAGGCCCTGGAGGCTGGGGAGCAGCTCCACATGTTGA  
GCTGAGTCGAGTTCAGTGTGGCCGT

>477

AGTTGGATCATTGAGCTGCTGGAGAAGGATGGCATGGCCTTCCAGGAGGCCCTAGACC  
CAGGGCCCTTTGGTGAGAACCCGTTTTCTCCTTCCTTCCCCAGCCTGTCTTGTCCCATC  
CCTGCCCTCCACAGAGTGCTAG

>478

AGCCCTACCACCCCGGCAGCTGTGGCGCAGGAGCCCCCTCCCCTGGCAGCTCTGACG  
TCTCCACCGCAGGTGAGAGCTCTCTCTGGGCCACAACCTCCCTTCCCCGAAGTGTCCC  
TTGTTCCCTCTGGCTCCCAGCACC

>479

TCCCACTCCTCAGACTCCGGTGGAAGTGACGTGGACCTGGATCCCACTGATGGCAAGC  
TCTTCCCCAGCGGTGAGTCGAGGGAGGTCCCCAAGAGGGCGTCCCATTAGCAATGCA  
CAGGGGGCCCGGCTCTTCCTGCAG

>480

AAACGAGGCCGGCCCCGAAAGCTGAGCAAAGAGTACTGGGACTGTCTCGAGGGCAA  
GAAGAGCAAGCACGGTGAGCTCCGGGGGCACGTGGGTCCCTCCCTGCGCCGGGCTGAG  
CGGCTTCCTGGGGCACTGCGGGTTGTT

>481

TGGCCCAACTATGGGGCCAAAAGAAAAAGAACAGCAACATGACCTACGAGAAGCTGA  
GCCGGGCCATGAGGTGAGCTGGCGGCCAGGACCCTCACGATACAGCCGGACATGGGG  
ACAGGCGCTCACACTCCCACCGCCCT

>482

ACGAATTGTTCTGCTCGGGCGTCCTGGTGCATCCGCAGTGGGTGCTGTCAGCCGCACA  
CTGTTTCCAGAAGTGAGTGACAGAGGTAGGGGGAGTGGGCAGGGCCTGGGTCCGGGGG  
CGGGGCCTAATATCAGGCTCATCTT

>483

AGCATTGCTTCGCAGTGCCCTACCGCGGGGAACTCTTGCCTCGTTTCTGGCTGGGGTCT

GCTGGCGAACGGTGAGCTCACGGGTGTGTGTCTGCCCTCTTCAAGGAGGTCCTCTGCC  
CAGTCGCGGGGGCTGACCCAGAG

>484

CTATGACCCGCTGTACCACCCCAGCATGTTCTGCGCCGGCGGAGGGGCACGACCAGAAG  
GACTCCTGCAACGTGAGAGAGGGGAAAGGGGAGGGCAGGCGACTCAGGGAAGGGTG  
GAGAAGGGGGAGACAGAGACACACAG

>485

GGGAGGGGAGGCTTCGCGGAACGCTCTCGGCGCCAGGACTCGCGTGCAAAGCCCAG  
GCCCCGGGCGGCCAGGTGAGGCCAGCGTCGCTCGCGGCATCGGGGCGCCCCGCTCCTT  
CCGCAGACCCCCGAAGTGGGGCGCAGGG

>486

GTCATTGGCTTTGCTGTGGACCTGGCCAACGTCTGGCGGTTCCCCTACCTGTGCTACAA  
AAATGGTGGCGGTAAGTCCCATCTCAGCCTCCCTGAGCATGCTGGCCGGGCGGGGGTC  
GTAGGTGCAGCCGGGGCCAAGGC

>487

GAGCTGGCCCTCGGCCAGTTCAACAGGGAAGGGGCGCTGGTGTCTGGAAGATCTGC  
CCCATACTGAAAGGTAATATGCGGGTGCCTCCCTTACCCTGGCGCAGCGCGGATCATG  
GTGGTGACGCTGGAGCTTTCAAAG

>488

GTGACTCCAGTGGAGACAGCTCGGGCCTCAACGACACTTTTGGGACCACACCTGCTG  
CCGAGTACTTTGAGTAAGTGGGAGTCGGGTCTCGGGAACGGGAGAGATGGCGCAGC  
CAGGTCCCCCATGGTAGCCCCCTTGGT

>489

AGCCTGCCTGGTGCTGGTCATCGTGCTGCTCTACTTCAGCCTCTGGAAGGGCGTGAAG  
ACCTCAGGGAAGGTGAGGCTCGGGGGTCACCAATTGGGCCTGTAGACATGGGGCCAC  
CAAGTGGACATGTGGCCGTGGCTGG

>490

CCTCCCTGGAGCCATAGACGGCATCAGAGCATACCTGAGCGTTGACTTCTACCGGCTCT  
GCGAGGCGTCTGTGAGTACAGTCTGCTCACTGCTTCACAGTCCACAGGGGCTCTGGCA  
TCCCAGGTTTCCATATGCATTG

>491

CCCTGGGCGTGGGGTTCGGGGTGCTGATCGCCTTCTCCAGCTACAACAAGTTCACCAA  
CAACTGCTACAGGTGAGCCCCTAGCAGGGGCCAGGCAGGGGCCTCATCAATACTAGGGA  
GAGGTCGCTGACTTCCAGAAATAG

>492

GTCGTCTTCTCCTTCCTGGGGTACATGGCACAGAAGCACAGTGTGCCCATCGGGGACG  
TGGCCAAGGACGGTGAGCCCCTCCTGCTGCACCTGGGCCTGCTCCGTGTAGCACCAGC  
GCCGAGCTCTCAGCAAAGCCTTTT

>493

GCTCCCTCTGTCTCAGCCTGGGGCCGTGGTCTTCTTCATCATGCTGCTCACCTGGGTA  
TCGACAGCGCCGTGAGTAACCCGCACCGCCCGGCCCTGTCTCGGCAGTTGGGTTCTT  
TCCACCCGAGGGGGGCCCTGCCCT

>494

ACACCGTGAGCTCTTCACGCTCTTCATCGTCCTGGCGACCTTCCTCCTGTCCCTGTTCT

GCGTCACCAACGTACGTACCATCGCCGGCTTCGCCTTCTCCTGGTCATGTCTCCTTAGC  
ACGTGGCACGGGGCGCCCTGGC

>495

CATTTTGCAGCCGGCACGTCCATCCTCTTTGGAGTGCTCATCGAAGCCATCGGAGTGGC  
CTGGTTCTATGGTGAGTCCGGGGGGAGGCAGCCAAGCCGGCACCTCTTGTTTGGTGG  
CTGTGCCACTCCCCTTCTGAAAA

>496

GATGACCGGGCAGCGGCCAGCCTGTACTGGCGGCTGTGCTGGAAGCTGGTCAGCCC  
CTGCTTTCTCCTGGTAAGGGACCTCGGGCCACCTGCCCTTCCCCCGTCTGCCCACTGCC  
CCCACTCTGGCACCTGCCCCGAGG

>497

ACTGGCCTACGCCATTGCACCCGAGAAGGACCGTGAGCTGGTGGACAGAGGGGAGGT  
GCGCCAGTTCACGGTGAGGTGAGGTCCCTGCTGGGCCTCTCTCGGGGGAATTCAGAA  
TGATCCCAAGCTCAGTGTCTTAGC

>498

CGGGGAAGAGGAGAAGGCACCCGCGGAACCGACGGCTCAGGTGCCGGACGCTGGCG  
GATGTGCGAGCGAGGTAGGTGCAGAGCGGGAAGCGAGCGAAGTGCGGCGTCTACGCC  
GCCGGGAGCCCCCGAGGCTTGTGTCGG

>499

TGATGATGAAAACAAAATAGCAGAGAAACCTGACTGGGAGGCAGAAAAGACCACTGA  
ATCTAGAAATGAGGTAAGCCTGTCAGAATATTCAAGCCTTGCCGTTTTGGTTTTAATGTA  
GATTTTGTGGCATTGACAGTTTG

>500

GACAGATACTTCTTTCTCTCTGGAAGACTTATTCCAGTTGCTTTCATCACAGCCTGAAA  
ATTCAGTGGAGGTAATTGGAACCTTTGGCTTTTATCCTCGCAGGAACATATCTGCACTGA  
CCTTTTGGTGAACAAATACAAC

>501

GAAGTCTGGATTAATGGTAGCAGGGAACTGCCTCCTCTCCCCACCAGCACCATGGCT  
GGCATCGCTCAGGTGGGCAGGGTAGAGTAAACAGGAGGCATAGCTGCAGCTTCTGTG  
GCAGAGCTTGCCTTAACCTCTCATT

>502

GACTCATGAAGGTGTTTCGTCACCCGCAGGATAACCCGCCGAGGGTAGGGTCGCGCTCGC  
CCGGGCGGCAGAGTAAGAGCCTCGCGCGCCGTGGAGGAGGGAGCAGGGCGGTCCCA  
GGGACCGGAGAGCCGGGCGGGGCGTT

>503

GTGGCGGGGGCCACGGCCTGCTCTGCCTCCTCTCCGACCACGTGGACAAGAGGATC  
CTGGATGCTGCAGGTGCACACTGGGTGGGCAGGGGACTTGAGGGTGGCTTGGCCCTG  
TGGGCCCTCAGCCTGTGCTGCTGGC

>504

CCAATCTCAAAGTCATCAGCACCATGTCTGTGGGCATCGACCACTTGGCTTTGGATGAA  
ATCAAGAAGCGGTAAGTGCAGCTTGGGATCTGGAGGGGGCCTAGAGAGAGGGGTGGC  
TATGAGAGAAAGAAGAGCTGTTGA

>505

CCGAAGTCGCAGTCTCCCTGCTACTTACCACCTGCCGCCGGTTGCCGGAGGCCATCGA

GGAAGTGAAGAAGTAAGTGAACGCAGACCAGGTGCGGTGGCTCACGGCTGTAATCCC  
AGCACTTTGGGAGGCCAAAGTGAGC

>506

AAGCCCTCTGGCTGTGTGGCTATGGACTCACGCAGAGCACTGTCGGCATCATCGGGC  
TGGGGCGCATAGGTGAGGCTCCACCGGCCCGCTTGCCCGCCCCGGCTCTCACAGCGT  
GGTTTGCATCCCTGGCACCACGTG

>507

GTCCAGAGATTTCTGTACACAGGGCGCCAGCCCAGGCCTGAGGAAGCAGCAGAATTC  
CAGGCAGAGTTTGGTAATAAGCCTTGATTCCCAGAAGCCTATCTGTGCCCAGTTGAAA  
GGCTGTATTTTCTCTCAATGGGGCA

>508

CCGAGGGACTCTGCAACAAGGACTTCTTCCAGAAGATGAAGGAAACAGCTGTGTTCA  
TCAACATCAGCAGGTATCCTAGGGCCACCTTACCCAGCAAGCCTGGAGAGGAGCCATC  
CCCACTGCTGCCATCTGGAGATTTT

>509

GCTGGACTGGATGTGACGAGCCCAGAACCACTGCCTACAAACCACCCTCTCCTGACCC  
TGAAGAACTGTGGTAAGAACTGCACCTTCTGATGCAAACCTCCCTGCTGCCCTGCAGGA  
CCAGTGTTTTTGAGGGGGTCCCAA

>510

CCCGAGGCCGTTCCGGGTCTGAACTGTAACAGGGAGGGGCCTCGCAGGAGCAGCAGC  
GGGCGAGTTAAAGGTGTGTACGTAGTTTTTCTAAATAGGACAGCGCTTTGCAAATTGGC  
TGTCATGGACTTGCTGTTTTGACA

>511

CAATGCCACCTTCTGCCTCATCTCTGGCCACCGTCCCGAGGCTGCCTCGCGCTTCCTCC  
AAGCCCTGCAGGTACAACCCCAATTTGAGCATCACCCATCCTCTGTCCCCCAGCACTCA  
TGAGCTGGCAGGGTACCAACCT

>512

GCTGCCCTTCTCCGAGGTCATCGACTGGACCAAGGCAGCCATCGTAGCTGATGAGAGG  
CTCCCACTTCAGGTAGCTCAGAGCCCTGCCACAGGGTGGGAACTGGACCCAGGACA  
GGGGAGGGACCTAGAATCCTGGATC

>513

GGGGCACTCCTGGCCCTGTCTACTTTTTCCACAAGCCCCCAGGACTTCCCCTTCTACTA  
CCTGCAACAGGGTATGCCCTGGGGATGGGACAACCTGAAGTCCCCTCAGCTCTACCCA  
GGGCTGCCCCAGCCTCATCTGGA

>514

GGTGGGGCCCCCAGGCCAGCCCCCTCTGAAGCTCATCCAGGCGGTGGCAGGCTCCCA  
GCACTGTGCCCAGGTCTGCCCCCTTCCCAGCTGGAGTCCTGGGATCCAGGGTGGGGGT  
AAGGGACAGGGCAGGGCCCTGATGA

>515

TGAGAGGCCACTCCCATCCAGGTGGCCGGAGACAGCTGTGCCCTTGACAGTCATTGAT  
GGGCACAGGAAGGTAAGGGATGAGGAGAGCCATGAAAGGGGTGGGCCCATGCTGGG  
AGCTGGGGGAGGGCACCCATGGGGTG

>516

CCCATATAGCACCATCAGAACAGATGCCATCCTCAGCCTCGATGCCCCGAGCAGTCTTT

CCACAAGTGAGGTGAGGGCTGGGCCCCAAGAGAAGCCCAGTGTGGGTAGACACAGAG  
CCAGAGGGCCCTGGCAGCCCCCTCAG

>517

GCTGGGGCTACACTGCTGAGAGGACCAACGAATTCTCCATGGTTCTCACCACAGCCGC  
CTTCTACCATAGGTACAGACCCTACCCTGCACAGGGATCAGAGTATCAGAGGCCAGAG  
ACCACCCCCACCCCGAACGGAGCA

>518

AGCAGCAGTCACCAAGCTGCCCCCTATCAAGGTGCCCTATGGCAAGCAGCGCCAGGA  
GGCTGCTCCACTGGTGAGGGCTGAGGGGGATTGGTCGGAACCTGGCACGGATTGGGCG  
GGGATGCCGGAGAGATCCCTCTCACT

>519

TGGGGGAATGGACCATCTTGGAGAGGCTGCTAGAAGCCGCGGTGCAGCAGCACTCCA  
CTATGATCGGAAGGTAAGGGCGCCAAGCCGGCGGTCAGGGGGCCCCGTCGGGCGGCC  
CCCGGGAGTCCCTTCTCACACCTGGA

>520

TTCTCGTCAGGAAGCCCTCCGACCCCAATCGGAAGCCTAACTACAGCGAGCTGCAGG  
ACTCTAATCCAGGTGCGTTGGAGGGGTCTGGGCTCCAGGAGGTTTGGGGGAGACAG  
GCGAAGGCTGCGTGGGGGGCACCTG

>521

GTCTGCGGAACCTGCGGGAAGGCCTTCTCTAGGCCCTGGCTGCTACAAGGCCATGTCC  
GGACCCACACTGGTACGTGCCCTCCAGGCGCCCCACCGTTGCTCTCTCTGGCAGCT  
TTTGTGAATCTGGGCTTGCTGTTC

>522

GCCACTTTCAGTCTTCAAAGAGAAAGATAAGAAATTCTGGATTTTCAAAATCCTTTTGA  
AGCCTTTTAAGGTAAGATGAAATATCCTTTTTACTCAGAACCAACTGATTCATTTAGAA  
AGAACTTTGAATTTCAAAGATG

>523

ATTATTATTCCTAAAGAAAATGAAGATAATTACATATTTTTGCATTTGGGCAGTAGCATG  
GGCCATTCCAGTAAGTATGCCTTTCTTAGAAAACCTCTTCACTTTGTTATCTTTTTTAAC  
CTAACATTAATACAAAATGT

>524

ACCACTGGAGAGACATGTCGAAAAATCCATGAATTTGCATCTCCTAGCAAGATCAAAT  
GTGTCAGTACAGGTATAGGATGTAATATATTTCAATTTTATTTCTATTTCTGAGTTGCTAC  
ATTCCATTAACTTCTCCAAGA

>525

AAGCAAACGCGTAGAAAATAGAATCACCAAAGAATCAGAGACACATGCTGTTGGGAA  
GAGCCAAGATAAGGTTAGTTTGTAAAGCTGATTTCTTTCAATGGCAGTTTAAATTCTTC  
CCCTCCATCTATTGATGCTAGCAC

>526

GGTGATTGTATCCAACCTTCAGTCGCATCTACCACCAGAATCAACGAGCAGACAAACGA  
AGGGCACAAAAGGTGCGTATTCAACTCCGTGCAACCATGGTTTAGCACTTCCCACTTT  
TTATAATGAGCTTTAAAATTTCTT

>527

AGCCAAAAGCGGAAGCGCAAATGCTTACATGCAGAGCAAACGGAATGGTTTACTCAGT



AATCAGCTGCAGGTACAATCAATTACATCTCTTTTTTTAATGTTCAATTTCTTGGTTTAAT  
ATTGATTTAGTTCTACTTTCC

>528

TGTTAGCAAATCCGGCTCCAGCTTTGAAACCCAGCACCACCACCTGCTTCACTGCCTG  
GAAAAAACACGGTAAGGAGACAGCATGACTGCCTTCCCTTGCTCTCTGACAGTAATT  
CCATTTGCTTTTGTGCATACTTAA

>529

ATCAAGGTAGTATACAAGAACTCAGCACGATTCAGATCAGATGTGTGGAGAGAACACC  
TCTGTCTAACAGGTACCTGAGATTAAATCTGTGTTGTCTACACACCTGTGCTGGTTCCCA  
GGGTGTGTCTTCTGCACTCATGT

>530

CTCGGTGCTCAACAGCCTGGTGGGGCCTGCCTGCATCTTCCTGCGGGCCAGCATTGCC  
GCCACCCAACCTCGTATGTACGGCCACCCGCCCGCCAGCCTGCCTGCCCTTGCCCTCTC  
CCACCAGCTCACCTGCCCTTGCC

>531

GGTGCCTGCATGCGGACCCTGGGCTACATGCCCACCGAGATGGAGCTCATCGAGATCT  
CACAGCAAATCAGTATGTGCCTCGGACCCATCCCCATCCCCAGTCCTCCAGATGCCCCC  
GCTGGGGCCCATGAAGCCAAGCAG

>532

GGGCCCCAAGCTGCTGGCAGAGACGGCAGACATGATCGGTGTCCGGGAGCTACGGGA  
CGCCTTCCGGGAGGTGCGGCCACTGGGGCTGAGGGCGGGCAGGGCTGCGTGTCTGCC  
GTGAGTGAGGGGCTGCGCGTGTGAAT

>533

AGCCAGCGGGAGGTGGACGAGATCCTCCAGGACGTGGACCTCAATGGGGACGGTCTG  
GTCGACTTCGAAGGTACCCCCTGCCGCACATAGCAACACACGCCCTGGAAGGGTCCTA  
GCAGATAAGAAACCGCACAGCAAGA

>534

TATGCTGGGAGCGGTGAAGATGGAAGGGCACGAGCCGTCCGACTGGAGCAGCTACTAT  
GCAGAGCCCGAGGTAAGCGCTCGTCTTTTCCAGGGGGAAGTGGAGCGGCGGCGCTCG  
CTCCTTCCCCAACCTCAGGACCGCT

>535

CCAGGAAGATGTCATTGCCACAGCCAATCTGAGCCGCCGTGCTATTGCAGATATGCTTC  
GGGCTTGCAAGGTAGAAATCCTTGAGGCATTTCCGTGAGGCAGCTTTGGGGCCAGAACA  
TAGTGGGAGAGAACTGTAGGGA

>536

TTGACAGGACATTCAAAGCGTGTGGCTGGTTCCGTCACTGAGCTCATCCAGGCTGCTG  
AAGCCATGAAGGGTGAGGGGTGACCAGGGACAGGGACGGATGGAAAACCCTTATCAT  
GGTGTGATCTCTGCTTCCTGGCTGG

>537

GGGAGCTGCAGCCGCCATTGAGGCTGCAGCCAAAAAGCTAGAGCAGCTGAAGCCCCG  
GGCCAAACCCAAGGTCAGTCCTGCTCCCTTCCCTTCCACCCTACCATGGCAGTGTC  
CCCACCTTCATCTCTGACTTTACAT

>538

TGCAGCAGCCACCAGTGCACTGGTAAAGGCTGCGTCGGCTGCCCAGAGAGAACTAGT

GGCCCAAGGGAAGGTGAGTGCTTAAATACCCAGAAGAATGGGGACAGGTTGGCACTT  
TGATGTCCACATCCACATCCATAGCC

>539

CACAGCCCAGCTCCTTGTGGCCTGCAAGGTCAAGGCTGACCAGGACTCGGAGGCAAT  
GAAACGACTTCAGGTGAGAACCCTGACCCATCCCATTGTCCCTTGGGCTATACTGCTTC  
AAACTGTCACTCCCGAGATGTATG

>540

TGCAGCCTTTGAAGAGCAGGAGAATGAGACAGTGGTGGTGAAAGAGAAGATGGTTGG  
CGGCATTGCCCAGGTGAGCTTCACCCAGATGCTGAGGGACGCTGTCAGGAGGGCAG  
TCATGTTGCCTGCGCTGGTCCCAACT

>541

GGAGAAGAAGGGACCCCAGGTCAGAGACTGGAGCCATTACTTCAAGATCATCGAGGA  
CCTGAGGGCTCAGGTAAGGGGTAGGAGGGACCTCAACTCCCAGCCTTGTCTGACCTC  
CAATTATACACTCCTTTGCCTCTTT

>542

CTGTGGACAATGCCCCGCATCGTTCTGCAGATTGACAATGCCCCGTCTTGCTGCTGATGAC  
TTTAGAGTCAAGTAAGTTTGGGGGCTAGAGAGCTGGGGGTCCAGGGGTGGAGCTAAG  
AAGGACTGCTCCCCAGGCTGGGTA

>543

CATCCGGGCCCCAATATGACGAGCTGGCTCGGAAGAACCGAGAGGAGCTAGACAAGTA  
CTGGTCTCAGCAGGTGCGTGAGGGGAGGGGATGGCTGCCAAGGTGTGGGAGGGAGG  
CAGACGGAATGAGGGGCCTGATGGACT

>544

GACGACGCTCACAGAGCTGAGACGTACAGTCCAGTCCTTGGAGATCGACCTGGACTC  
CATGAGAAATCTGGTGAGTGCCTTCACATCACCTGCCAGCTCCTCCTTCACTTGGCCT  
CAGACCCAACCCTGTCTCAACCCA

>545

ACATCAAGGTCAAGCTGGAGGCTGAGATCGCCACCTACCGCCGCCTGCTGGAAGATGG  
CGAGGACTTTAAGTGAGTGGGGCTCTCCTACCCACACGTGCTGGGATCAGGAGATCAC  
TTCTCCCCAAAGTCTGAGCTTTTG

>546

TATGTTAAATGTCTGTCTCCAGAATATGCTGGAAAGGCTTTTAAAGCATTGCATGGCTCT  
TGGTTTGATGGTAAGAAATTTGAGTACTACAAACATTTTGAAAAGATAGTTATAGTTTAA  
TTTTAAACTATACCAGATT

>547

ACCGCTAACGTGCTGCGCGACATGGGCCTGCAGGAGATGGCCGGGCAGCTGCAGGCG  
GCCACGCACAGGGTGAGCCGCCCCCGTTCCCCTCCACCCCGTCTTTCCCCTCCACCC  
ACACCAGCGCTTACCCCGCGGGCTC

>548

CGCCTGGAGGAAAAACAAAGACTTTCCAGAAAGAAGAGAGAAGCGGAAGCTATGAA  
AGCCACAGAGGATGGTAATGAACTTCCCTTCTACTCTTCTTTCTTGATGCATGGAGAAT  
GCCAGCACTAATTTTTTTCTTTCT

>549

GGCAAGCCGGTGATGGAGCGCTGGGAGACCCCTATATGCACGCGCTGGCCGCCGCCG

CCTCCTCCAAAGGTAGCCCCCGCCCGGCCTGCACCGCCCCCGGGGGCGCAGGGGAAA  
CTGAGGCCGGGGCTGCCCCGACCCG

>550

TTGGATCATCGAGTGCAATGACGGCGTCTTCCAGCGGCTCCGGGACTGGGCCCCACGG  
CAGACACACAAGGTGCCCCCTGCCCCGCAGGCCCTCCAGGACCCCCACTCCTTGGGG  
TGAGGGCACTGCTTCCTGGGGGTTG

>551

GGGGCCGCTGCTCCCCCAAAGCAGCACAGCAGTACCAGTCCCTTCCCCACCTCCACG  
CCCCTCCGCAGAGTGAGTATCTCCCATGGAGTCCCTGCACATCAGTGCTCACGGATCTC  
AGAGCGCTGTCAGTCTCCACTGG

>552

ATGAGAAGGAGAAGGCGGAGAAGCAGCGGCTCAAGGAGGAGCGGCGCAAGGAGAG  
ACAGGAAGCCCTGGAGTGAGTGTCCTTGAGGGCCATGCTGGGCCCCGCCACCCTGCTG  
CTGGATTCCGCTCCTGGCCACTCTGATG

>553

TCAAAGGCCGGCAGCCCCTGAGGTCCGGACCCACGCACGTTTCCACCCGGAATGCAG  
ATATTTTAAACAGGTCAGAGCCTGAGGAGGTCGGCCTTCACCCACTAGTGATGCTGGA  
GGCCAGCATCCTGAACCCTGGGGTC

>554

TGCCTACTGGGGTACCTGGAATAAGAAGACGGCACTCATCCGCGCGCGAGACCCCTGG  
GCCAGGACACGGTGAGCTAGCCCCAGAGTGCCTCCGTCCCCGTACCTCCTCACTGTG  
CCCCTTTCCTCCAGCCCCAAAGAC

>555

CTATGAGGTGGACAGTGATGAGGAGTGGGAAGAAGAGGAGCCTGGGGAGTCCCTGTC  
CCACAGTGAGGGGGTAAGGATGTGCCCCAGCTGTCTTCACTCACAGACGGCTTGTGTT  
TGAGTCTCTGTCCACAGTGAGGGG

>556

GGATGAAGATGAGGACGATGGTTTCTTTGTGCCCCATGGGTACCTGTCTGAGGACGAA  
GGTGTGACAGAGGTGAGGGAGTGAAGGGGGAGGTCACCGGCTCAGCAAAAGTTCATT  
TCTGGACTGGTGCTCAGTGGCCTGA

>557

CTGGAGACCCTGCCGGCCCAGGAGGAGCAGACGCCCAAGGCCTCCAAGCGGGAGAG  
GAGAGACGAGCAGAGTGAGTGTGGGCGGGGCCAGGCCACCCACCTGTTCTTGGGCCC  
AGCTAATTCCAGGGCTGAGGGCAAGAG

>558

GCTGAAGAGGAAGTCAGCGGGCAGCATGTGCATCACCCAATTCATGAAGAAGCGCAG  
GCACGACGGCCAGGTGAGGTGGGGTGGGCAGGTGGGGGCCTCTGCAGGGCTTTTCTT  
TTTTTGTTTGTGTTTTTGTGTTTTGT

>559

CAGGCAGACACGGAGGAGGAGGAAGAGGAGGAGGGCGACTGTATGATCGTGGATGTC  
CCGGATGCTGTGGGTGAGAAGGGCTGTAGATAGCAGAACGCACTGGTGAGGTGGGCG  
CTGGAGGTAAACCTCAACAGAGAAGG

>560

GCATGCGTACCCTGATGGCCGTAGAGAGGAGCCACAGAGACAGAAAGTGGGAACATC

AAGCAGATACCGGGTAACTCTCACTGTTTTTTTAAAGGAGGGGAAATTCCAAGGTATC  
AGTTGAGTCCTGCACATATTGGGGT

>561

CCATTCCCGATCAGCTGGATCCTGGAACCTTTGATTGTGATATGTGGGCATGTTTCCTAGTG  
ACGCAGACAGGTAAAATCACTGTGCTAAAGGAAGGAGCATGAATAGGCTGTCTTTTTG  
TGATTGTGGAATGATAACAGAG

>562

CTATGACACGCCTTTCAAAGAGAGAAAAGTCTTTTGAGATCGTGATTATGGTGCTAAAGG  
ACAAATTCCAGGTAGGTTTTGGAGAGGGACAGGTTGAGTCCTCATTAGTGAGCAGGAG  
TGCACAGGGGGGCCTTTCACATT

>563

AGAGAAAATAGACACTCTGGGCATTTATGGCAAAGTGAATATTCCTCAATTGGTTTTA  
GCTTCAGCTCGGTGAGTGACCTTCCACAGCTTGGGGTCTTTTATGAGGATGGTTTCTGA  
TGAGATGGTAGAAAAAATCTTC

>564

GGTTGAACACCCCCATGGGCCCTGGACGAACTGTCGTCGTTAAAGGAGAAGTGAATG  
CAAATGCCAAAAGGTCAGTATCCTTCGGTACCAGTCACAGTGCAGATACTCCGTGCCT  
GTTACCGCCTTCTACCCGTGAACG

>565

TCAGGAGTCCTGGGGAGAAGAAGAGAGAAATATTACCTCTTTCCCATTTAGTCCTGGG  
ATGTACTTTGAGGTGAGGTTCCAGTTTTTTGAAAATGGGACAGCAATAAGAATCCTGGG  
AGCAGGGGTGGGATAAGTGGTCCA

>566

GGGTGCACGTGTGCGGCGGGTCACTGCTCAGCCCCAGTGGGTGCTCACAGCTGCCC  
ACTGCTTCTCCGGGTGAGTGTCCGGGTGGGCAGGGGCAGTCTCAATGTCCAGGCCCCA  
GTGGGGCATGCGCCAGCGCAGAGGC

>567

GAGGCCTCAGATGACTTCTGCCCTGGGATCCGGTGCTGGGTGACCGGCTGGGGCTATA  
CGCGGGAGGGAGGTGAGGAGCCCCCGTGGGGATGCTGGGATGGAGGAAGGCAAGGG  
CGGCCATGGAAGAGAGCTGGCTTGAG

>568

TCCCGGCCCCGGGGGCAGCATCATTACGCCCCGACATGCTGTGTGCCCGGGGCCCCGGG  
GATGCCTGCCAGGTGAGCCTGCCAGGCCGTGACAGAGGATGGGGGCGGCTGAAGCCC  
AGGGAGGGGCTCCCCATCTTCTCGG

>569

TGAATTTTGTAGTTGGGAAGCCTCCTTTTGAGGCAAACACATACCAAGAGACCTACAAA  
AGAATATCACGGGTAAAGACGCAACTGAAAAGGACCCAGCACATCTGCTGGAATCTTT  
CCTTATCAGCCTGAACTGCAGGCC

>570

CTAATTAAATTTAGGGGATCCTGATGCCACTTAGCAGTGGGATTTTCAGAGGACCTTTCA  
GAGGAGCTAAGGTAAGATGAGATGGAGGCAGAGTGGGGCAGGAAAGATGGCTTAGGG  
GCCTCTTTGGGCTTTGTGACACTC

>571

TTGCCTTGATTTTCTTCAAAGACAACCTATAATCATTCAAAAATTCCAAGTTGGGTCCA

AAATGTCAAAGGTAGGTATTGGACTCTGCCATGTGCCAGGTCATATGCCTGAGTCTGTG  
TCCTTCAACAGGCTGTCTTAT

>572

GGCGATGAGCACCCTACTGCTGCATTGTGCAGCACGCGGGGCTGGCGCAGCCCCCTCA  
GGGTGGAGCTGGGTGAGGTCCCCGCCAGGTGGTGATGCTCCTGGTTTCCCGTTGCCTTG  
TCTCACTGCTGCGCCGGTCTTCC

>573

GTCTTGCTACTCACGGCAGCGGCTGTAGGAGGAGCTCTGTTGTGGAGAAGGATGAGG  
AGTGGGCTGCCAGGTGGGGGGCAGCGGGAGGAAGAGCCTCTGAGAGAGGGACAGAG  
ACCCCAAGAGAGGGGCACACAGACCTG

>574

CGGAGCAGGTTGAGGACTGTGTGCTGACTGTGGAAGGAAGTGGCCTCTTCAAGAAAC  
AGCAGAAAGTCTTGTAAGTGCTGCAAGTGCTCAGCCTTCTCCTGTTTTTCCCCCTGA  
GATTAGCACTATCCTTCCTGAACAT

>575

TGGCTCTCATCCCAGACTTGGCCATGGAAACCTGGCTTCTCCTGGCTGTCAGCCTGGT  
GCTCCTCTATCTGTGAGTAACTGTCCAGGCTCCTCTTCTCTGTTTCCCTGGACTTGGGG  
CGCTAATCACGCCTCTCTTCCC

>576

TTTAAAGAAGCTTGGAATTCCAGGGCCACACCTCTGCCTTTTTTGGGAAATATTTTGT  
CCTACCATAAGGTGAGTGTTTTTGAAGTCACTCTTTTGCTTCTTATGATTGCCAAGAGC  
AGCTTAGTTCCATCAGTAAAAA

>577

TATCACAGATCCTGACATGATCAAAACAGTGCTAGTGAAAGAATGTTATTCTGTCTTCA  
CAAACCGGAGGGTAAGCATTTCATGTGTTGAAATTAAATACTGATTGATTAAATTTATAT  
TTTGAAATTCTTATATATTCA

>578

TGAGGATGAAGAATGGAAGAGATTACGATCATTGCTGTCTCCAACCTTCACCAGTGGA  
AAACTCAAGGAGGTATGAAAATAACATGAGTTTTAATAAGAACTTAAAGAATGAATC  
TGGTGGGGACAGGTATAAAATAAG

>579

AGTATGGAGATGTGTTGGTGAGAAATCTGAGGCGGGAAGCAGAGACAGGCAAGCCTG  
TCACCTTGAAAGAGTAAGTAGAAGCGCAGCCATGGGGTTCTGAGCTGTCATGAACCCC  
TCCAGCTGCCTGCCATGGAGCTGAT

>580

GACCCCTTTGTGGAAAACACCAAGAAGCTTTTAAGATTTGATTTTTTGGATCCATTCTT  
TCTCTCAATAAGTATGTGGACTACTATTTCCCTTAATTTATCTTCTCTCTTAAAAATAAC  
TGCTTTATTGAGATATAAAT

>581

AGAAGTTACAAATTTTTTAAGAAAATCTGTAAAAAGGATGAAAGAAAGTCGCCTCGAA  
GATACACAAAAGGTAAAATGTGGTGGTAGTTATAGGAGGATGTTTAGTTTTTCATAATTT  
TTTAGATAATATACATATGATC

>582

TGAACTGGCCACTCACCTGATGTCCAGCAGAACTGCAGGAGGAAATTGATGCAGTT

TTACCCAATAAGGTGAGTGGATGGTACATGGAGAAGGAGGGAGGAGGTGAAACCTTA  
GCAAAAATGCCTCCTCACCCTTCC

>583

TGATTCCAAGCTATGCTCTTCACCGTGACCCAAAGTACTGGACAGAGCCTGAGAAGTT  
CCTCCCTGAAAGGTACAAGGCCCTGGGAAGGGAGCCCTCCCTGAACCAGCCTGGTT  
CAAGCATATTCTGCCTCTCTTAATC

>584

CATGAACATGAACTTGCTCTAATCAGAGTCCTTCAGAACTTCTCCTTCAAACCTTGTA  
AAGAAACACAGGTTAGTCAATTTTCTATAAAAATAATGTTGTATTAATAATTCTTTTAA  
TGAGTGGTCTGTATTTTTTAA

>585

TGTCTTGGCCATGGTCCCCTGGTGCTGCAACTCCTCTCCTTCACGCTCTTGGCTGGGCT  
CCTTGTCCAAGGTCAGGGGCAGGTTCTGAGGGTGTGGGGTCCCCACGCCTGGCTTTTG  
GCTGTGGACACAGCCTGGGGCTG

>586

GGTGAGCTTCCAGAGAAATCTAAGCAGCAGGAGATCTACCAGGAGCTGACCCAGCTG  
AAGGCTGCAGTGGGTGAGTATCTGGAACCAGGCTTCTTGGGCCTGAGATGGTCGTTGT  
GTGGTGTGAGTTTGCTTGAGTCACT

>587

GCACGACTCCATCACCGCCTGCAAAGAAGTGGGGGCCAGCTCGTCGTAATCAAAG  
TGCTGAGGAGCAGGTACACCTGGTGGGGATCCCCGTCCTGGCCTAGGGCATGGCTTCT  
GGCCAACTGGGGAGGAGGTGCTCAG

>588

GGATGGGACTTTCAGATCTAAATCAGGAAGGCACGTGGCAATGGGTGGACGGCTCACC  
TCTGTTGCCAGGTAGATCTCAGAAGGGGCACCCTATCCACTGGGGCTGGAATTGTGA  
AACTCTGATTTGAACTTTCCCTGG

>589

GGCGCCCTGGTGCTGCAACTCCTCTCCTTCATGCTCTTGGCTGGGGTCCTGGTGGCCAT  
CCTTGTCCAAGGTCAGGGGCAGGTTCTGAGGGTCTGGGGTCCCCAGGCCTGGCCTTTT  
GGCTATGAACAGAGCCTGGAGTG

>590

GGTGAGTTGCCAGACCAGTCCAAGCAGCAGCAAATCTATCAAGAACTGACCGATTTGA  
AGACTGCATTTGGTGAGTTCCTGCACATCAAGGGTCCTTGGGCCTGAGATGGTCTCTG  
TGTGATGTGACTTTACTTGAGTTA

>591

GCACGACTCCGTCACCGCCTGCCAGGAAGTGAGGGGCCAGCTCGTCGTAATCAAAC  
TGCTGAGGAGCAGGTACACCTGGTGGGGTCTCCTCGTCCTGGCCTGGGGCATGCTTCTG  
GCCAACTGGGGAGGAAGTGCTCAGA

>592

GGATGGGACTTTCAGACCTAAATCAGGAAGGCACGTGGCAATGGGTGGACGGCTCAC  
CTCTGTACCCAGGTAGATTCTGGGAAAAAGGGACACTGTATCCAGTCCGGCTGGGTT  
CCTGCAACTCTGACTTGAGCTTTCC

>593

TTCAGAGACGAATAGTTGTTTCCCTGCTAGCCTCAGCCTCCATTGTGGTATAGCAGAAC

TTCACCCACTTGTAAGCCAGCGCTTCTTCTCTCCATCCTTGGACCTTCACAAATGCCCT  
GAGACGGTTCTCTGTTCGATTT

>594

GGCAGGCCCCGCGCCGCTTAGGAGGGAGAGCCCACCCGCGCCAGGAGGCCGAACGCG  
GACTCGCCACCCGGGTAAGCCAAACTCGGGCGAGTGGGGGCCCCGGCAGGGGACGCGT  
GGCCCAAGTCCTGCCGCCAGCCCTCC

>595

TTGGATCCTTCTTTGACTCATACAATATTTAATCCAGAAGTATTTCAACCACAGATGGCA  
CTGCCAACAGGTAAGAAAACCTCATCCCTGTTACCCTGTTGTTCTGCTTTCAGTCTTAGT  
AAAATGCAGGATTTGTTAATA

>596

AGGCCCATCCCATGGTGGACTACCTGGTGCCTCTAGTGAAAAGAACAAGAAGTCTTAC  
CCTCAGGTCAAAGTAAGTTTGTGGTAGCTCTCCTTCTATTTGAATTCTGGAAATTTTGAT  
TTCCTACGATTTCCAAGGAATT

>597

GCCTGGTGGGAAAACACTGTGAGGATGGGATCTGCACTGTAAGTCTGGACCCAAGG  
ACATGGTGGTTCGGGTAAGTAGGGGTATATGATGCTGTGGAAGGTAGGAACAGATAGAA  
TATGGGATGCAGGAACTTAGAATGA

>598

CCTGGACTCTTGGTGCACCCTGACCTTGCCTATTTGCAAGCAGAAGGTGGAGGGGACC  
GGCAGCTGGGAGGTAAGCATCATTTTCCTGGCCTTGATCCTCCAAGGGGTCCAGGCTT  
TGGTTTTTCATCTGTATGAATTATA

>599

CTTCCGGATAGCACTGGCAGCTTCACAAGGCGCCTGGAACCCGTGGTATCAGACGCCA  
TCTATGACAGTAGTGAGTACTTCACTTCCAACAGGGGGGCACACCAAGAATAGACTTCC  
AGCCCTGCCCTGCCATTTACTTGC

>600

ATGGACAGGACAGCTGGATGTGTGACTGGAGGGGAGGAAATTTATCTTCTTTGTGACA  
AAGTTCAGAAAGGTAAATACATTCTGTGATCTCTGATCTCAAGAGGTGTGATCTTGACA  
CACTACAGTTCTGAGTGTGTCTG

>601

TGAAGAGGAAGAAAATGGTGGAGTCTGGGAAGGATTTGGAGATTTTCCCCACAGAT  
GTTTCATAGACAAGTAAGTGATTTATTATTATTATTAATCCTTATTATTTTATAGAGATGGGAT  
CTCACTCTGACACCCAGGCT

>602

CAGCTTCGGAGGAAATCTGACTTGGAAGTCTAGTGAACCAAAACCTTTCCTCTACTATC  
CTGAAATCAAAGGTAAGTCAGTTGTTTAAAATCTTATGCTCATATTTTATTTTATTTTATT  
TTTGGTTTTTGTGTTTTGTTTTG

>603

GCTGGAGCTGGAGGCGGAGGCATGTTTGGTAGTGGCGGTGGAGGAGGGGGCACTGGA  
AGTACAGGTCCAGGTACAAAAATACTTATTCTTCCTAAAACCTTTTTCATATTGGAGAGG  
GTAGAATTTCTTTTCTTTGGTTT

>604

GGATTTCTACTTATGGTGGGATTACTTTCCATCCTGGAACCTACTAAATCTAATGCTGGG

ATGAAGCATGGTAAGTAATGCTTTGTTCTTAATACCAAGAAAGGAAAAAATAATTAAT  
GCTAAAAAGGGTTTTTAAAT

>605

ACCGTTGGGAATGGTGAGGTCACTCTAACGTATGCAACAGGAACAAAAGAAGAGAGT  
GCTGGAGTTCAGGGTAAGTGAGCACACAAATTACGTTCTGTTGGTTGGCTGGGGAGGG  
GTCAGTCCTAGGTGCAGAAAGATAT

>606

CAGGAGACGTGAAGATGCTGCTGGCCGTCCAGCGCCATCTCACTGCTGTGCAGGATGA  
GAATGGGGACAGGTAAGTCAGAACTTTTGCATGATAGGTTGTCCTGGGTGGGGAAGAA  
GAAGAGCATCGTATAATGCATACT

>607

GGATCTACTAGAAGTCACATCTGGTTTGATTTCTGATGACATTATCAACATGAGAAATGA  
TCTGTACCAGGTAAGCAGAAATCTCAAGAAAACAACTGAAGAAAAATCTGTAGTTTAC  
TTTTTCTTCTGTTATGTTTGGG

>608

GATAAAGTTCTCAGTATCTTACTCAAGCACAAAAAGGCAGCACTACTTCTTGACCACC  
CCAACGGGGACGGTAAGAGACAATCACACATCATTGGTGTAACTTTCTCCACCTTCTA  
AATATCTACTAGGTATTTGATAAA

>609

CGGGCGCACAGCACTGCACCTGGCTGTGGAGCACGACAACATCTCATTGGCAGGCTG  
CCTGCTCCTGGAGGTGAAGGGCACACTTATTTGCTTTTGCATTAAATTTCTGAGGGAGA  
TTTAAGGAAATCTTTTCAAAGAAG

>610

GGAACCACACCCCTGCATATAGCAGCTGGGAGAGGGTCCACCAGGCTGGCAGCTCTTC  
TCAAAGCAGCAGGTAAGATGGTGATCTGGCGGTCATTAATGAAAAATGTTACCAGGAA  
TGCAAACCCAACCTCAATAGAGCA

>611

GGAAAATGCAGGAGAGGATGAAGGAGTTGTGCCTGGAACCACGCCTCTAGATATGGC  
CACCAGCTGGCAGGTGAGTGCCGCTCCATCTGTCTGATGGCTGCCCCTGAGGGAGTCA  
GAGGTTCAAGGAATGTAAGAACAGAT

>612

TCTGGGGATACTTAATAATGCCTTCCGGCTGAGTCCTGCTCCTTCCAAAACACTTATGG  
ACAACTATGAGGTAACACCTTACCTTACAGATTTAGCAATTTTCATTTGACTTTACTCTG  
TTAACATCTCTGGCCAGGGCA

>613

AGCCCAGTGAAGACCACCTCTCAGGCCCACTCGCTGCCTCTCTCGCCTGCCTCCACAA  
GGCAGCAAATAGGTAAAAAAAAGACAAAAGACAGTGGAGATATTTTCCAGCTCCCC  
CAGGCTGGTGTCTTCAGCTCTTTTT

>614

AGTGCAACCAATGGTCAGCCCGACCAACAGGCCGCACCAAAAGCACCCCTCAAAGAAG  
GAAAAAAGAAAGGTATGGAGAAATCCACTTGAAGCCAAGGAAGGGAGCTAGAGAT  
GGTTACCCCTGGAGAAATGTGAGATTC

>615

GATTGGCATTGATGATGTGCCAGATGCAAGAGGGGATAAAATGAGCCAAGACTCTATG



ATGAAACTAAAGGTAAAAGGGAAATGAATGCTTTATCTGTATATTAAGCAAAAGTCCAA  
GAGAGGGAATTATATTAGAAGCT

>616

ACAACACAAACAAAGGATCTGGGTCAACATTTCCCTTTCTGGGATAAAAATAATTGATG  
AGAAAAGTGGGGTAAGAATTCACATTTGCTGATACCTCTCTGACCACCTGAGTCTGAC  
CAACAATTTGCTACTTGAATTC

>617

CCGGGCATTTGGTTACGTGTGTGGAGGAGAAGGCCAGCATCAGTTTTTTGCCATAAAA  
ACCGGGCAACAGGTGAGCTCTAAGTCTTGACATAGACCTGGGGACTTGTCTCTGTGG  
ACATTGGAGTGTCTGTCACTCAAC

>618

ACATGACTCCATAGCCATTATCCACCTCCACAAAGTACCAAACCAGGAAGAGGCAGA  
AGGACTGCTAAGGTGAATTGTCTTCTCCACATATCCATTAGCAGAGTGCATGTTCCGTA  
CCAAAGGGTGGTGTGATGCAAGC

>619

CTGCAGCCCAACCCTCTGGATCTCTTCAAAACAAGTGCTCCTGCCCCAGTGGGGCCCC  
TGGTGGGTCTAGGTAGGTGCCTAGAGATAAAATTAAGTATGACTCTTTTGCTTTTGCTCA  
TAAATGATGATGCATCGGAAG

>620

GTTGGCATTCCCTCAGGAGAATGCAGACCATGATGACTTTGATGCTAATCAACTATTGAA  
CAAGATCAATGGTAAGCCACTCACCCTCTGCCTACTGTTCCAACAACCTATCTCCACTG  
CCACATGGACCTAAATGAGTTC

>621

TACCAAATCTACTGACAATGCATTTGAGAACCCTTTCTTTAAAGATTCTTTTGGTTCATC  
ACAAGCCTCTGTAAGTATGAACTACTAGAAGCTCTTCTCCAAAGTACATGCCACATAGA  
GCTCCAGCCTCCTGAATTAAC

>622

TGGCTTCTTCTCAACCTGTATCTTCTGAGATGTATAGGGATCCATTTGGAAATCCTTTTG  
CCTAAATTCTGTAAGTAGAAGATCCTAATAAGCCTGTCTCAGGAGTTTTTGTGAGAAAG  
GGTGACATGGAATAAAGAGTG

>623

GGTGTCCCCACTACCCATGGCTTCCTCGGTACCCTTGGTACCCTAGGCTCCCAGGGCAG  
GTGAGGAGCAGGTGAGCATGGGCTTGGCTTGGGGGATGACAGGGAGGTTCTCCCAGT  
GGGGGCCCAGCTCTCAGAATCAGA

>624

CTTGGCAACTTTCCTGGCCCTTTTGAAGAGGAAATGAAGGGTATTGCCGCTGTTACTGA  
TATACCTTTAGGTAAAGTTCACCTAGAAGCTTTAAAAAAGTAATTAAATTCTTTTA  
CAAGTTTCCATTGAGGTGTGA

>625

ATTATTTCAATTCAATATTTTTATGAATTATTTACCATTTGTACTTCAATAGTAGCAGAAGA  
CAAAAAAGGTAATTGTGCGCTGAGGGAGGGTGGGCAGCATGAAGCACTACATAAAGA  
AAAATCTTCTAAATGAAATTA

>626

AAACAACAAAAGTGTCTTCAAGGCTTCAAGCTTTGCTGGCTATGTGGGCATGTTAACA

GGATTCAAACCAGTAAGGAGTCTGTTGTTACATAATTATACAGGTAGCCTTCTGTCCTG  
TTACCGTTATGTAAAAGTTGAAA

>627

GGATTCTGGGAAAGAAAGATGCCATGTGGATAGGGTTCCTCACTAGAACAGTTCTGGA  
AAATAGCACAAGGTAAAGTGTTCGTTGCTTTACTATTAAATATTTATTTTAAATTACTCA  
TATTAAAAAATAAAAAATATTT

>628

GAAACATCCCTTCTTCCTTGATGATCGCAGAACGCCTGCAAAGATGTGTTTGAACCGC  
ACCAGCCAAGAGGTACCTTTGCAGGGTCATCTATAGAAAGAAACTGTTGCCATTAAAG  
ATTCCCTTGGTTCTGGCATTTTTC

>629

GGAAGCCATCGCCTGGCCCCGGCTCTCTGGACCTTGTCTCGCTCGGGAGCGGAAACA  
GCGGCAGCCAGAGGTGCGCGGGCGGCTTTCTCTGCCGCCTCCTGGGGACTTGGGCGC  
GGGAACTGCGCGGAGCCTGCGCTGGG

>630

AATGCTTCTCACCCGGAAACAAACTTGCCAGTTGGGTATCCTCCTCAGTATCCACCGAC  
AGCATTCCAAGGTAAAGCAGTTGCTGAAAGAAGAAAAAGTAAATTAATTGAGAGAC  
AGAGAGAGAGAGTGAGAGTGGGAG

>631

AGGGGTACCATGGATGCCAGCGCCACAGCCTCCATTAAACTGTCCACCTGGATTAGAAT  
ATTTAAGTCAGGTAATTTCAAAGACACAAAATACTCATAAAAAACAGAACTGTGCTTC  
CAGCTTGCTTAACCAGATTAGCA

>632

TCAAGAAGTCATAACTCTGGAGAGACCACTAAGATGTAGCAGCTGTTGTTGTCCCTGC  
TGCCTTCAGGAGGTCTGTGATCAATTACCAGGGCACTTTGTAAAATAGTTCAGCAAGAA  
TTTCTGCCCTGTCATTGAACCTT

>633

AAGAGAGGATGTACTAAAAATAAGTGGTCCATGTGTTGTGTGCAGCTGTTGTGGAGAT  
GTTGATTTTGAGGTAAGAGATGTCATAATGTTTATAAGATTTGCTTTCCTAATATAAGAA  
GAATGTAATTTTGCAGGACATT

>634

TGGAATCCAGTTCCCTTTAGACCTTGATGTTAAAATGAAAGCTGTAATGATTGGTGCCT  
GTTTCCTCATTGTAAGTCTGTTCTTATTAATCTTGATTATAGATGCTTTCCTAGGTTCAAT  
CTGAAATGATTCAGTAAAG

>635

CTGCTTACCCTGAAGCCTGGGGAGGCCATGTTTCTGGAGGCCAACGTACCCCATGCCT  
ACCTGAAAGGAGGTGAGCACATTTACAGCAGTGAGCCCACTGCCATCCCTGCTGGGCCC  
TGTTTCCCTATCTGGACAAAGGAA

>636

GAGTCAGGAAGACCCCTACCTCTCAATCTATGACCCCCCTGTACCAGACTTCACCATTA  
TGAAGACGGAGGTGAGTGAGGGGCTATGATGGGTGTCCTTCGTGTGCCATGAAAATCT  
CTGGCAAGGGTCACGATGTGGAG

>637

TCAAGATTATAAAATAACCCAACGGATGGTCTGTGCTGGCTATAAAGAAGGGGGAAAA

GATGCTTGTAAGGTAACATCATGAGATTATGAAAACACAATAGGCTGCTTGAGAAAATTC  
ATTTCAAAATATATTTTCCAATA

>638

CCAACTGCTGGTGAAGGCCACCAGGATGCCAGCGCCACGTAGCTGCAGGCACACA  
GCAGCCCTACACGGTATGTGAGCTGGTGGTGCCTCTGACAGCCTTCCTGGGGGGTCAG  
GGTGTCTCTGTGGGTGTGTGTGTG

>639

CATCCTCGCCCGGGACCCCATGAACCGCATGGAGATCTTCCGGCTCAACACCATTCCCC  
TGTTTGTGCAGGTGAGTCTGGGGCAGGTGGGCAGGAGAGGTCCCCCACCAGTCTT  
AAAGGGCAAGGTTAGGAGTCCCAG

>640

GACGCCATTGATGCAGAGGGGGCCTCGGCCCCACTCATGGAGTTGCTGCACTCCCGCA  
ACGAGGGGCACTGGTGAAGTCTGGGGGAGGGCAGGAGGCTGGGTCCCACTCCCCAGCC  
ACGATGGAGGCTGGCCGACGTTTAAC

>641

CTACCGGAAGCGCGTGTCCGTGGAGCTCACCAACTCCCTCTTCAAGCATGACCCGGCT  
GCCTGGGAGGCTGTGAGTATCCTAGGTTGGACCGCAGTAGTTGGTTGTCAAGTTGGG  
CACTGCCCATGGGCAACACTTTTG

>642

TCTATGGCCATGCAGGCAGCTGCACTGGGTTCCTCTATCGGAACAGCAGTTGTTGGAG  
GTCTGATGACAGGTCAGCATAAAAAGTGAACACTTCCCTGTATCTTATGCTCTCAGATT  
ATTTACAATAGATAATTAATGAG

>643

AATTCTAAAGTTGCCTCTCTGGGGACAGCCATCTGACCAGAACTGCTATGATGATTCTG  
TTTATTGGAAGGTACTGTACAGTATTCTAAACAAGAATGTGAACGATGACTCCATTAGT  
GAAAGCTTTACACACTTCAAGC

>644

AAAGGTGAAGTCTCGAGAAAGGGAGCAAATCAAGTCACTCAACAACCAATTTGCCTC  
CTTCATTGACAAGGTGAGTTTCTCTCTCATTGCACTGGTAGGGCTGCCGCTGGTCCACT  
TGGGATTGGTGCAGTCAAAACACA

>645

AGAGTGATCAATCTCGGTTGGATTTCGGAAGTGAAGAACATGCAGGACATGGTGGAGGA  
TTACCGGAACAAGTAAGGGACCCTGTCTGGGCAGTTCTTAACTTTTGCTGTAAAAGAG  
TTCCAGAAAGTAATAAGCTAAGAT

>646

GGTGGACCTTCAGGCCAACTTGACAACCTTGACAGCAGGAAATTGATTCCTTACAGCA  
CTCTACCAAGCAGTAAGTCTTCCAGTTTCAACCAAGTTTATCTAAATGGAGAGTTTTTA  
AGCCTGAACCCACAACGATTGAG

>647

GATAGAAATTTCTGAGCTGAATCGTGTGATCCAGAGACTTAGATCTGAAATCGACAATG  
TCAAGAAGCAGGTATGTGCTTTCTCCTTCTACCACTCAGCTGTATGGAATGGGGGTAAC  
CCTCAGGTAAAGGGCGAGTGCT

>648

TGAACACCAAGCTGGCCCTGGATCTGGAGATTGCCACCTACAGGACCCTCCTGGAGGG

AGAAGAAAGCAGGTGAGGAAGGGACGCTGGGAGTCGAACCTCTTCTCATGGTCTTCC  
TTCCTTGCAAGCTGATTGTTGTTGA

>649

GCCCACATTTATGCCACCCGCCTCATCCAAATGAGACCCTTCCTGGAGAACCGGGCCC  
AGCAGCACTGGGGTAAGTGAGAGTTTGGGAAGGTGCTTCCCCACAGCATCCCTGAA  
CTTAGAAGTGTTCTGCAAGAGAATG

>650

CTGTGTGGTGGGCACTCTGTTCAAGGCCATGCCGCTGCAGCCCTCCATCCTGCGGGAG  
GTCAGCGAGGAGGTGAGGCAGGGTGCTACACAGTGGGGCCGCCAGGCAGACCTGGC  
CTCCCACTAGAACACCTCCCTGGAGG

>651

CTGGTCTTGGAAGATGAACTGCAGCGTATCAAACCTAAAAGGCACCATTGACGTGTCAA  
AGCTGGTTACGGGTAGGGAGCCCAATGAGAGGATGTGGGTGATGCAGGTGAAGAGCC  
CAGCGGTGGTGTGTTAGGGATGGTG

>652

TTCTGGTGGAGGACTATTGCTTTGCTGACCTTGCTCCCCAGAAGCCCGCACCCCCACTT  
GACACAGATAGGTGAGCAGCAGTTCTCGGGAGCTGGAACCAGCTCATGGTCAGTGGA  
ATCTTTGAGTTGCACCTAGGAGGG

>653

CGTCTCCCGGGTTATCCTCGCTGGCAACCTCCTCAGCCACAGCACCCAGAGCAGGGAT  
TCTATCAATAAGGTATGGAGCCCACCTGGCTGCATTAGCCCCAGCCCAGGAGCCTGC  
AAGCCTGTAAGACCCTCCTTCCCC

>654

CACCAAGAAAACCCAGGCAGCCAGCGTGGAGGCTGTTAAGATGCTGGATGAGATCCT  
CCTGCAGCTGAGCGTGAGCGAGCTGGGGGCTGGAGGGGTGATGGGGATTGCAGTCTT  
CAAAGCTGCCACTGGGCAACAGAAGG

>655

CGCTGGCCACTGCCTACTCCACGCTCCAGCTGGTCACCAACCCCTACCAGGCCACCAT  
TGATGGAGTCAGGTAGCTGGCACAGCCACACTTCAGTCTGACCCAGCCTTTTGCCTCA  
GGAGGCACAAAGAAGGGAGGGGAG

>656

GATCACTTGGAGATCCTGGAGTGGACCCTGCGGGTCCGTCACATCAGCCCCACAGCCC  
CTGACACTCTAGGTAACAGGCTCAGCCATACAGGGTGGGAGCAGAGGGCCAGGAGGC  
CTGGCAGGACCCTGAAGTGCACAGG

>657

ATCTTCCCAGAGTGCCCGCATGTCTACTTTTGTGGCAACACCCCCAGCTTTGGCTCCAA  
AATCATCCGAGGTAATTTTTGTCTTCTGGGGGCCAGGCTGATTGCTGATTGCTCTCA  
CCTGGGGACAAGGTTACAGA

>658

AGAGTACCCTGAATACCAGCGTTGGATGGGCCTCAACGACCGCCTCAGCTCCTGCAGA  
GCTGTTTATCTGGTGAGTCTGGGGACTGTGTACTCCCTCTGTTTCCCACGCCCTCTGTC  
CGCTTTCTCTTGCTTTTAGGTGA

>659

AGTTAGACTCCTTCGCTGTATCGTCTACTGATTCTTAAAATGTGACAAATCTGATTGGAC

GACTTACATGGTACGGTGCAATTTTTGATGTCCAGACTAAAGTGAGTCTTCTCTAGGCA  
AACAGTAATTTTGGTTAAAC

>660

AGTGCCGGGAGGGCAACGCAGTCGCCGTTGCGCTGTGGCTGGACAACACGGAGAACG  
ACCTCAACCAGGGGTGAGCTGAAACGGTTGGTGGATGAGAGGAAGGCTAGAGATCTC  
CTGGCTACGTGGAGTGGAGTGCTCAT

>661

AATGAACCGTGGGGATGACACCCCCCTGCATCTGGCAGCCAGTCATGGACACCGTGAT  
ATTGTACAGAAGGTACGTACAACTCCTTCGTCATCCACATCACATACATGCCATGAGG  
GTCAGTCACAGGCACTGTAACAT

>662

TGCAGTGAATGAACACGGGAATGTGCCCCTGCACTATGCCTGTTTTTGGGGCCAAGAT  
CAAGTGGCAGAGGTGAGTACTCAGCCCTTAATTCCTGAGATGGGTAGGAAGTAAAGTC  
TGAGCCTTGGTGGGAGATTTTGA

>663

AGCATCTGTAACAAGTATGGAGAGATGCCTGTGGACAAAGCCAAGGCACCCCTGAGA  
GAGCTTCTCCGAGGTCCATCTCCCCATCCCCTAGCTTGTGTCTCTCGTCCCTTCCCAC  
CTGTCTTCTCCCTCTGTACCACAG

>664

ATGGGCCAGAATCTCAACCGTATTCCATACAAGGACACATTCTGGAAGGGGACCACCC  
GCACTCGGCCCCGTGAGTCACCACTGTGGGAAGAAGGGTTGTAAAAGGAAATAATCC  
TGGCCTCTTGGGGCTGGGTAGGGT

>665

CAAACACTCTGGCATTGACTTCAAACAGCTTAACTTCCTGACGAAGCTCAACGAGAAT  
CACTCTGGAGAGGTGACCCCTGCCCTTCTTGCCCTTCCCTCACTAAACCCCCATAAATT  
ACTTGCTTTGTACCTGTTTTAAG

>666

AGGTGCTGAAGGTTGAGACTGGAGTACAAGGAAGAGCAGGGACTTCAATGAAGAGT  
GTCCCCGGCTCAGGTAGTGCAAGGCGTAACCTGGAAGCTGCTAGTTCCAAGGAACCCT  
GAATAGCACTGAAAGAGATCTTTTG

>667

CCTCATCCTACTCTCATCACACACTGGATGCCGTATGGATCCCTCTACAATGTACTACAT  
GAAGGCACCAGTGAGTAGGGATGTTGAATTTCTTGGGGAGGAAATGGCAGAGAGGG  
AGCCTCTCTGAACTATTTGACTT

>668

GGGCATGGCCTTCCTACACACACTAGAGCCCCTCATCCACGACATGCACTCAATAGCC  
GTAGTGTAATGGTGAGGCCACAAGCTCACTCCTGGCCCAGGCCCAAAAGCCCTTTGC  
CTATCTATGACTTACCTCCTTCT

>669

ATGGCTGATGTCAAGTTCTCTTTCCAATGTCCTGGTTCGCATGTATGCACCTGCCTGGGT  
AGCCCCGAAGGTGAGTGAAGTCATCATGTGCGGAGGTAAAAAAGGACCACCTCAGA  
AGTAGTGGAAGGGGGCAGAGACAG

>670

GCTTCTGTGGGAACTGGTGACACGGGAGGTACCCTTTGCTGACCTCTCCAATATGGAG

ATTGGAATGAAGGTGAGAGCACAAACAGCATACATTTGTGTTGCGGGAGTGGTTGGTGA  
TGGTGAAAATAACTGTAGTGGGCC

>671

TGATAATCCAAATGGAGATGGAAGATGTGTGACATGTATATATTATCTTAATAAAGACTG  
GGATGCCAAGGTATGCAACTTAATTGAGCATTTATTTTTTTCTTACAGGTGTCTTTTTCT  
CAAAAGCATTAAGTTTCATA

>672

TTGATAGACTGCTGTTTTTCTGGTCTGACCGTCGCAACCCTCATGAAGTACAACCAGCA  
TATGCTACAAGGTAGTATTCCTTTTCAGAAAAAATTGGTTTAGAGTATGGTAGGACAGG  
AGGGAATCTGTAGAGTAAACGT

>673

CTTTCCAAAGCAATTCACAAGTCCTTCCTAGAGGTTAATGAAGAAGGCTCAGAAGCTG  
CTGCTGTCTCAGGTACTGTTTGCTAGAATCTTCTCCCCTCTTCTAGATTTGTATTTTAGA  
GCAATCTTGAGTGGGGAGTGG

>674

ATGGCTGTGCTGTATCCTCAAGTTATTGTGCGACCATCCATTTTTCTTTCTTATCAGAAAC  
AGGAGAACTGGTAAGTTTATTATGAAAACAAAATTTTATTTAATAGGTCACAAAGAACC  
TCTTTTTTAAATGGAGATTTT

>675

GACTGCCTTCGGCTTTTTTTCTGCTGACTAAGATCTCCTATAGAGAGCTACAACAATGC  
CCAAAAGAAAGGTAAAGTGAAATGGAAAGACAGACGGGGAATGAGCTGCTGAGTTACC  
TATTTCTAATAGGAAGAATTTAT

>676

CAAGCAAGAAGCAGTTGTTGAAGAAGACTACAATGAAAATGCTAAAAATGGAGAAGC  
CAAAATTACAGAGGTATTTTCTAATGTTAACAGTTTATCTATTTGAAAGTTTAAACAATG  
GGTACAACCTGAAAGAAATCCTAT

>677

GGCCTTCAACCAGAGGTTCTGTGGTTCTGTCAGAAAACAGTCCAGGAGCACTATCAG  
GACTTTGACAAGGTGAGCCCGGGGTGCAGGTGGCAAGGGGCACCTTGCAGGGCCTGG  
GTGCAGCCCCTCCCTCCCAGCTCCA

>678

CCTAGAGCCAGCGGCAACCTCATCCACAGGAGAAGATTGTCAACCTTGTCAATGACA  
TCTTTGGAGCAGGTAGGAACCAGAACCTTGCCCCTCCATCCAACAATGCCTGCTGTTT  
ACCCACAGCCTTGCCCAGCCCCTC

>679

GCCATCTCCTGGAGCCTCATGTACCTTGTGACCAAGCCTGAGATACAGAGGAAGATCC  
AGAAGGAGCTGGGTACATGGGGGCCCCCAACCCTATAGCCAGGAGAAGCCTTGAAAC  
CCAGGTGTTTTGTTTCAGTCTACAAA

>680

CCTACTTGGAGGCCTTCATCCTGGAGACCTTCGGACACTCCTCCTTCTTGCCCTTCACC  
ATCCCCACAGGTGAGGCCTGCCGTTCTGCCCTCCACCTCTAAAGTGCTTGCCATGT  
TTTCTCTCCTGGCTTCTCAGC

>681

CGCTGAATGGCTTCTACATCCCCAAGAAATGCTGTGTCTTCGTAAACCAGTGGCAGGT

CAACCATGACCCGTGAGTACATACCCCTCACGAAAAAATGTGTGCAGGTTTCAGCAGTC  
AGGAAGGCTGTTTGTCCCTGCTAG

>682

AAGGGGAAAGTTGCACATTTATATCCTAGAGGGAAGCGACAGCAGTGCTTCTCCCTGT  
GCTGAGGTACAGGTAAGGAGGGTGGTTTGTAAAGTTCACTGGGGAGGGTGATCCCTCT  
TTATTGTTCTAATATTATGCTCGC

>683

GAGGTCCGCAGCCAGGGAGGACGACAGCATCCGCCCTTTCAAGGTGGAAACGTCAGA  
TGAGGAGATCCACGTAAGGCACCTTGGGCCGGGCCGGGCTGGGCAGTGGAGAGGGTG  
GTGTGTCTGAAGACAGGGGTTGGGTCT

>684

AATGAATTTGACTGGAAGAAGCAGGTGGAGATTCTCAACAGACACCCTCACTTCAAG  
ACTAAGATTGAAGGTATGTTTGCAAAACGCCAGCCAGAGAGGGATGTATGTCATGAGA  
ACAGCCTTCTTCCACAATGTGACTT

>685

GAGCACGTTTTTTGAAGTCATCTGCCCTTCCATCCCTGGCTATGGCTTCTCAGAGGCATC  
CTCCAAGAAGGGTACGGGGCTGCTAGAGGTTCCATAACTGCCCCGTCTCGCCAAGGG  
TGGGCCCGGTGTTCCCACCAGGC

>686

AGGAATTCTACATTCAAGGAGGGGACTGGGGGTCCCTGATCTGCTACTAATATGGCCCA  
GCTGGTGCCAGGTGAGGTCAGTGTGGGGTGGTGTGTGTGTGTGTGTGTGTGTGTGTGT  
GTGTGTGTGTGTGTCCTCTAAGAA

>687

AAGGTATTCTACAGCCTGATGAGGGAGAGCGGCTACATGCACATCCAGTGCACCAAGC  
CTGACACCGTAGGTGAGTGTGCTCAGGGGTCCTCGCCCCTGCGGGCTCCACTGGGGC  
AGGGAGACACCGCGGGGTAACCTC

>688

ATATTCTAGAGAAGTTTTTCCACCTGGACCAATACGGAATTCCGATACCTGGAGGATGGA  
GGCCTGGAAAGGTGAGGCCCTGGTTTGCCCCCTGCAGTCATGACCCTGGTCCCAGCAG  
CCAACCTCCTCACCTCTTCATC

>689

CCATCATCTCCTCCCAGCGCTTCTACAAGGAGAACCTGGGACAGGGCTGGATGACCCA  
GAAGCATGAGCGGTGAGCCTGGCTGAGCCGAGAACAGGGGCTCTGAGGCTGGAGG  
CAGGGGGACGGCCAGTCTTGGGCTCC

>690

AATGATCATAGCACCTTGGATGGGTATTCCAGAAGAACCACCTTGTCTTCAAAAATGTA  
TCACACCAAAGGTAAGGATGTTAAGACTCATTCTTAGCACATCAGAAGTGTCTTTTGAA  
TTATTTTAGTGAAACGATGCAG

>691

GAGGGTGAGGACCGAGGAGCGCGAGCAGATCAAGACCCTCAACAATAAGTTTGCCTC  
CTTCATCGACAAGGTGAGCTACGATCTTTTGTAAAAAATCACTGTGGGTCTGAAATAAA  
TGCCAAAGAGAGAGAAAGAAGGAA

>692

TGGGGGAACGGGGCCGCCTGGACTCAGAGCTGAGAAACATGCAGGACCTGGTGGAA

GACTTCAAGAACAAGTGAGTTGGGGTGGAGGGTGGACACAGGGGAGGGTGGTGTCTT  
CTTGGTACCAGATGGGCTTTGTTACTA

>693

GGTGGAGCTGGAGGCCAAGGTTGATGCACTGATGGATGAGATTAACTTCATGAAGATG  
TTCTTTGATGCGGTAAGAACTTATCTAAATTTTTTCACATGGGTGGGTTTTTTTTCTCA  
AGTTGTCATATCACAATGAGTG

>694

GGTCAAGGCCCAGTATGAGGAGATTGCCAACCGCAGCCGGACAGAAGCCGAGTCCTG  
GTATCAGACCAAGGTGGGTGCTCTGATGACTGTCTCCTGAGTGAGGGGACACACCCAT  
GTCTAGGATTCTAGGCCATGACGAC

>695

GCATGAGATCACAGAGATGAACCGGATGATCCAGAGGCTGAGAGCCGAGATTGACAAT  
GTCAAGAAACAGGTAGGGTGAGATTGAAAGAGGGCAAGGAAGGGGCCTGAGTTCTA  
AAAGAAACACCTACTTTGTTTTATTT

>696

TGAACACCAAGCTGGCCCTGGACGTGGAGATCGCCACTTACCGCAAGCTGCTGGAGG  
GCGAGGAATGCAGGTGAGTAGACAGCATGAACTCAAGATGGCCTTCAGCTGATAAAG  
CGAAGCTGCTCTACTGTGGGGTGAC

>697

GGCCCCCTGATACCCCTCTGCCTGAGGAGGTAAAGAGGTCCCAGCCTCTCCTCATCCC  
AACCACCGGCAGGTACGATGGGGCGTGGGGCTTGGGGGAGGTCAGTGCTGGATAATA  
CACAGAGGCTTGCAGGCCACTGCTC

>698

ACAGAGCCCAATTCTCGGGGGCCCCTCCAGTGCAAGGGGGCTGCTCCCCCGCGATGCC  
AGCCGCCCCCATGTGAGTTGTCCCTCAGAAGGGAAGGGAGGGATGCACGGGTTCTGG  
GTCTGTGGGAGATACACAGCCGCTT

>699

GTGCAGCGAGCTCACGCCTTGAGCGACGAGACCTGGGGGCTGGTGGAGTGCCACCCC  
CACCTAGCACTGGGTAAGTCAGGTGCATGGAATATCCGGGCTGGGAGATGATGCCTT  
GCATCTTGGGCTAGGCATGTGGCTC

>700

CGTGGGCGGAGATAGCCGCTTCGTCTTCCGGAAAACTTCGCCAAGTACGAACTGTTC  
AAGAGCTCCCCAGTGAGTGCATGAGGGCTGTCTGGGCGCTGGGATGCCCTGATCCTCA  
ACCTGGATGCTGGAGCCCTGATCC

>701

GTTCCCAGAAAAAATGGTCTCCAGCTGTCTCGATGCACAACTGGTATATCCCATGAAG  
ACCTCATCCAGGTGGGGGGACCCCCCATTTACTGCAGATTCACGACTCCCCAGCATT  
GGCCAGTGCTTCTCCACCCTTAA

>702

GCTTTGGAAACGCTTTTTCTGTTTCTTGCGCCGATCTGGCCTCTATTACTCCACCAAGG  
GCACCTCTAAGGTAAGGTCTTGAGGGTACCAGCCCCAGCCCCTCCAGTCCCTGGTCCT  
TTAGAAGTTGCCCCCTTCTCTGC

>703

CAACGTGTACGTGGTGACGCAGGGCCGCAAGCTCTACGGGATGCCCACTGACTTCGGT



TTCTGTGTCAAGGTGAAGACCTGGCCAGGCCTGGCCCCTGGCCTGGGGAAGCAGGAA  
CTGCTCAGGCCCCCTGGATCCTGCCC

>704

GCTTCGGATCTTCTGCAGTGAAGATGAGCAGAGCCGCACCTGCTGGCTGGCTGCCTTC  
CGCCTCTTCAAGGTGAGACCCTGGGAGTGGCATGGGGGGCTGGCCTGGCCAGAGGGA  
TCCCCAGCTCTGCCCTCAGGAAGTC

>705

GCTGTACAAGAATTACCAGCAGGCACAGTCTCGCCATCTGCATCCATCTTGTTTGGGCT  
CCCCACCCCTTGGTGAGTGTGCCCAAGGGGATGGGAGGGTGGGTATGCAGGCCCTGTCT  
TACGGGTACCTGGGCCCTGTTCT

>706

TGCTGGGCGTGTCATTGAGAACCCCCGGGAGGCTCTGAGTGTGGCCCTGGAGGAGGC  
CCAGGCCTGGAGGGTGAGGCCTGCTGTGTGTGTGTGTGTTTGTGCTGGGGACCCACTC  
TCTGGGTGGGATCCCTGAAATAGGA

>707

TCTGGTTCCACGGGCGCATTTCCCGTGAGGAGAGCCAGCGGCTTATTGGACAGCAGGG  
CTTGGTAGACGGGTAAAGGGCAGGGCCGGGCAACAGACCCAGGGATAAGAGAGACTG  
GGGTCCAGGTGGCAGCCATGGTCCT

>708

GCGGAACCCCCAGGGCTTTGTCCTCTCTTTGTGCCACCTGCAGAAAGTGAAGCATTAT  
CTCATCCTGCCGGTGAGCTTCCCTGCGTCCCCGGAGTCCTGCAATGAGACACAGGACT  
CCCAGCAACCTGTCCTCCTCACCA

>709

GATGGCAGTGGCCGGCTGCTCCAACCTGGACCTCCAACCTTCCTAGTCGGATTGCTCTTCC  
CCTCCGCTGCTGTAAGTAAACTCACCTTATCTTAAACCAGCCTATGTAAGCTGACATG  
AAGATACTCCTTAATAATACAG

>710

TTACCCCGATGGGCGGCTAGCAGAGCCTGAGAAACCTCGGAAACAGCTCAGTTCTCA  
AGGCACTGTGAGGGTAAGGACTTTAGCCATCTCTAGTTGGGGACACTTAGCAGCTGTG  
GGCATTTCCAGGTACCGTTCCTGGC

>711

GATATGCTTTGTACGATGCCACATACGAAACAAAAGAGTCTAAGAAAGAAGACCTAGT  
ATTTATATTCTGGTGTGTAAAAACAAAAGAAAAAAGTACTTTTAAAATGCAAGGATTAT  
TATCATAGTCAGTCTTACCTTTG

>712

GAAAGTGCACCTTTAAAAAGCAAGATGATTTATGCTAGCTCTAAAGATGCCATTAAAAA  
GAAATTTACAGGTACAACTTGAATATTTGGGGCAGAGAAATTATTCTTTATTAATTATA  
ATAAAGTAATAGGATAATGTT

>713

CACAAGAAGCAGCTGGACTCTCTGCGGGAGAGGCTGCAGCGGAGGCGGAAGCAGGA  
CTCGGGGCACTTGGGTGAGGCACTGGGCTGTTGGGGCCGAGGCTCAACCGGGGAGGA  
CGGGCGGGATCCCTAGAGAAAAAGCTC

>714

ACACCACCTCTCTGATCTGGCCTTAACATTGCCCACTGATGCTGTGTCCATCTGTCTTGC

CATCTCCACGGTAATGACCTGACAGAGTTAGGATTTACCACTTATTTTCAGTTCACGGT  
CAGTGTCTTATTGCCCATACC

>715

CTCAGATGTTGATCTGGAGATAGAGAGCCTTCTGAACCAACAGTCCACTAAGGAACAA  
CAGAGCAAGAAGGTAGGGGTCATGTGAAAATACTCTCACAATATGCTCTTAATTATAGC  
TTTGTTTGACAGGGATTTACCCC

>716

ACTATGGAACCAAGGAGGAGTGCATGAAAGCCAGTGATGCTGATCGACCCTGTCGCAA  
GCTGCACTTCAGGTCTCTTGGAAGGGAATGAGGTGGGATGGGTTTGTCAGAAGCAGC  
CATTCCTTTTCAGCATATTCCTTCC

>717

AAGCCAGGAGCTTGCTCTTACACAGAGTGTCTGGAGGTGATTCCAGTGCAGACCGACTC  
TTCCACCTCAGGTACCTGTCTGCTCAGAAAACCTCGTCTCAACTTACGGACTTATGTTT  
GATAGGGCAGCCATACACGTAA

>718

ATGAGATGCGCAGGCTCAACATACCCGTA CTACAGGATGATGGCTTTCTCTTCTCTGG  
GTCACAGGCAGGTAATGCAATTCAGTTATGTAGGTATGGACAGATACAGTACAAGAGT  
GAATACTGAATGGGAGATAAAAT

>719

TCAACTGCAACGCATCATTCGGACAGGCCGTACAGGTCACTGGTTGAACCATGGGAAG  
GAACACTGCTTGGTGAGCAGCAGTGGGGCCCAATTCAATAGGTGGAGCACAAAGAAG  
AATCATTTGATTTCTTACTGAGAAA

>720

TTGAAAGACTATCTCCTGGCACTCGCAAGATTGAGTTATTTGGACGACCACACAATGTG  
CAACCCAACTGGTAAGGTGACCAGAGAACAGGCTAGTCCTCAAGGGGCTATTATTTAT  
GATTAAGGACAGAACTTAGTAGA

>721

GGCTGGGCCGAGTGGGTGTCTGGTGCCGGCGTTTGGGCTACGGTTGTTGTTGGCGACT  
GTGCTTCAAGCGGTGAGTGTAGATCACCTTCGCAGCTGCCACAGGGAGAGTAGGAGT  
GATTGCAGCTGAGAAAGACGCAACA

>722

CAACCTGCTTCAGCTGGATCCTGATTGCAGAGGATGCTGTCAGGAGGAAGCACAATTT  
GAAACCAAAAAGGTACTGTTTTCTAGTATATTCCTTCCATTGGATGGTTTAGTTGAGAC  
AAGGTAAAAATGTAAGTTGCTTA

>723

GCTGCCCCCTGAACCCCAGAACAACCAGCTGGATCAGTTCTCACAGGAGCTACAGCGCT  
GAGACTGGGTAAAGTCAACGATCCCCAGAGCTGGGACAGAAGGGGCAGCAATGGGGCA  
GCAACTGAGGGAGAAGAGAGCTGAC

>724

GCTGCCCCCTGAACCCCAGAACAACCAGCTGGATCAGTTCTCACAGGAGCTACAGCGC  
GGAGACTGGGTAAAGTCAACGATCCCCAGAGCTGGGACAGAAGGGGCAGCAATGGGGC  
AGCAACTGAGGGAGAAGAGAGCTGAC

>725

ACAGCCCCACCTCCGGCAAGTTCCGCCGCGGGAGCGGCTCGGCCTGCAGCCTTCTCTG

CTGCTGCGGAAGGTTTCGAGTCCCGGGTCTGGCACATTCAGATTGGAGGTTAGGGAATG  
GGGAAAGGGGAGCGAGCCAGAGAA

>726

GAAGCTGGAGTTTAACAAGGCAGAGAAGCACGTGCACAACTTCATGATGGATATCCAG  
TATACCAAAGAGGTGAGATGGGCATATGGCACCCATGGGACACCCCTCTTCCAAGAAG  
CAGGAGTCCAGGCGCCCCTGCTTC

>727

AACATACTCGCAGGAAGGAGTCTCATGCTGCCCCGCAGGCATCAGCGCAAGCTGCTGGC  
CGCCATCAACGCGTGAGGGCCGCTTTGTATGCACACGTGTCCATGTGCACCCATGTCCA  
AGTCACCTCTCTGCACGGCTGTG

>728

GTTCCGCCAGGTGCGGCTGAAACACCGGAAGCTCCGGGAACAAGTGAAGTCCATGGT  
GGACATCTCCAAGGTACTAGGATCCCGTGGGAGGAGGTCTTGAAGAAGGGGGAGGTT  
GGGGCCACAGGGAGGGAAATCTGGCC

>729

GACTGAGCTGCTTAGCACTGCCCTGGGGCCGAGGCAGCTTCCAGAACCCAGCCAGCA  
GTCCAAGTAGCTGGTGAGGGGGCTGGGACTTGGGCAGGAAGGCATCCTGGAGGAAGG  
GTTCTGTGGCCAGCACCCCTATGTGG

>730

CGTGGTAGCCTAGAGTCCTGGGGAGCTTCTGTCCACCTGTCCTGCAGAGGAGTCGTTT  
CCAGCCCGGCTGGTGAGTGCTGGCCAGGGTGGGGCAGAGCAGGCGGGGCGGCGAAA  
GTCCAGACCTGGCTGTGCTGTCTGGA

>731

CGAGAAGAAGACAACATGTGGCACCGTTTGCCTCAAGTACCTGCTGTTTACCTACAAT  
TGCTGCTTCTGGGTGAGGAGGGGTGCGCTTGCCCCACCCCCACCCCCACCCCTCCCG  
GGCCACCATCAGACCTGGGCAGAT

>732

TGTCGTCATGGTGACTGGGGTCTTGGGCTGCTGCGCCACCTTCAAGGAGCGTCGGAAC  
CTGCTGCGCCTGGTCAGGAGGGCGCAGGGCCACGGGGTGGGGGTGGTGCAGATGGGC  
CCAAGGAGGTTGTGCTGCAGGCTT

>733

CATCCTGCTCCTCATCATCTTTCTGCTGGAGATCATCGCTGGTATCCTCGCCTACGCCTA  
CTACCAGCAGGTGAGGGGCCTGGGCAGGCCATTAGAGACACAGACATGCACAGGCG  
GGGCGGACACACACACATGCACA

>734

CATGACCAGGCGCTACCACCAGTCGGGCCATGAGGCTGTGACCAGCGCTGTGGACCA  
GCTGCAGCAGGAGGTGGGTGGGTGGTGTGCTGGGAGGGCGCGTGCATCCCCAGGGCCTC  
CCTGGACCTCTGCAGGAGCCTCTGGC

>735

CAGCTGCTGCAAGACGGTGGTGGCTCTTTGTGGACAGCGAGACCATGCCTCCAACATC  
TACAAGGTGGAGGTGGGTGTGACGGGATCATGCCTCCAGTGTCTACGAGGTGGTGG  
GGGGGCACCCAGTGACTGGCTGT

>736

GTTGGAGACCTTCATCCAGGAGCACCTGAGGGTCATTGGGGCTGTGGGGATCGGCATT

GCCTGTGTGCAGGTGAGGGCACATGGGGGTGGCGGTCATCTTGTTGGGGACACGGGG  
CAGGGCGGTGGCTGGTGGCCCCATG

>737

GATCCTAAGGACCTTGAGCCCCGAGGAGCTAGAGCAGCTGGACTGCGAACTACAGGA  
GATGGATCCTGAGGTAGGGGCTCCAGCACAGGGAACCAGAGGCAGTCCCAGGCATT  
GGGAAGGGTGTGGGCTCTGGGTGGC

>738

TACTTGGAGCAACAGGCACTAGAAAGTCAAAGAGCGTGATGACTTGGTGCCCTTCACA  
GGCGAGAAGAAGGGTATGGGGACCCTGACATCCATGCCTCGTAGAACCCAAGTGGCT  
GTGCTGTCTCTCACTCGTCCCCACTC

>739

ATCACCTGGAGCCTGAGCTGGAGGAGGCACTGGCACATGCCACAGATGCTGAAATGT  
GTGACATTGCAGGTGGGTAGCTGTGGGAAGTTGAGGGTGAGAGGATCAGGGGCAGGT  
GGATTCTAGCCATGACATGGGACTA

>740

CTGATGAGTAACAAGCAATACTATGATGCCCTCTGCAGTGGAGAAATCTGCAACACTG  
AAGGCATTAGCAGTGAGTGTGTTTGGGGAGCATGGTCCCCAGGGCTCTGGGCAGGCA  
GTCCTAGTGTCTGGGAGAAGGTAGA

>741

TGAGGAGATACTAAAGAGGGTCCGAAGCAATGACAAGGAGCTGGAGGAGGTGAACTT  
GAATAATATACAGGTATTTGACTTGCATCCTCCAAACCATAACACCGGATAACCACTGA  
CATCCGAGAGTCCCTTAGCCCACC

>742

AATGAAGGCAAATACCTATGTGCGGAGCTTCAGTCTGGTAGCCACGAGGAGTGGTGAC  
CCCATTGCCAATGTAAGGCTAGTTGACATCCCCAGCCCTCTCCCCACATCTTACATGCA  
CCTGTTGCATGGCTGTCATAAAG

>743

AGGACTCATGGCTGTGCTGAAGGCAGTTCGGGAAAATGCCACACTCACTGAGCTCCGT  
GTAGACAATCAGGTCAGCATTCCCTTCCCCTGATGTTAGCATTCACTGAGTCTCATTGAGTCT  
CCTCCCTGAGCCAGCCAGTGGGG

>744

GGCTACCACTTTACACAGCAGGGGCCACGAGCTCGGGCAGCCCAGGCCATGACCCGA  
AACAATGAACTACGTGAGTAACTGCAGACATGATGTGTGGAGTGGTCAGGGAAGTGC  
AGAAATTGGTGGATCCTCCTGAAAGC

>745

GACCAGGAGGAGACCAACACCCTGGTGGCCAATACCAGCAACTCCAACGGGCTGAAA  
TTGGACCCCGCAGGTGAGCCGGGAAAGTCGCTGCCGCAGGTGGTTGGGTTTGGGGTG  
CCCAGAGCCTCGCCTGGCCTTCGGCG

>746

AAAGCTATATTAGTTCCTAGCACCCCCGGAAGCTCAACAGCACAAAGTGATATTGAAGA  
AAAGGAGAACAGGTAATCCTAAAACCAGCCAAAAGATGGTCCTCATCCTCTTAGGTCT  
ACTGGACATAGTCATCTCCTGGGC

>747

ATGAAGCAAAAGGAAATGAAATCCCACAGACAATTGCTCCCTCCACCTATGTATCAAC

TTACTTGAAAAGGTACCAGGCTCAAAGGGGGTGGGAGATGTTTCTTCACTCTAGCCA  
TGGGAAATGGGTAATGATTGTATG

>748

GGGTTACAGCTACTCCTGTGCTCTCCATTACTGGAACAGATTCTCTGTGGAAGCCAGG  
GAGAAGAGGAGGTATGTTGAGTTACTGATTTCAATTTGTGGGGCTCTGCTTTGAGGTAGA  
CGATAAAGGAATGGGCATAAAG

>749

GGATGAGGAAGCAGAGTCTTTACGGAAAGCACGCTCCAGACAAGCTCGGCAGACACG  
AAGGTCTACTCAAGTGAGTGTGGCTTTTTTTTAAATGTCATTTTGTGTATCTACCCTTCT  
GTTGGAGGTACAATCAAAACACA

>750

GCCCTCAGCAGTTCCAGCAACAGAAGCTGGGGAGGGCCAGCAGCCCTGGGGCAGGA  
GTCTGGATGAAGAGGTGAGCTCATTTTTGCTGGCATGTACTGTGCTAAAAGCAGGGTA  
ATTAGTTTGGGGAGTATCTTCTTCAC

>751

TCAGTCCCTGATTCTGAGAGTTCAGAGACTACCACAAACACTACAAGTCAAAGGAAA  
TGGACAAAAATGGTATGTAGAACTTCAAAAGACACAGGCCCTCCACAGTGCACATCC  
CCAGATTCTTAAAGTTCATACTTT

>752

GTCCATCCGAGAGAGGAGGCGGCCCAAGGAACGACGAAGAGGCACAGGCATCAATTT  
CTGGACAAAGGATGTAAGTGGATTGGTCTGTGCTGAGGCATATCATATTACTCTTGGTC  
ACCATTCTTTCAGTTGAGTTTAAA

>753

GGCCCGGGAGGCCCCGCTAGCCACCCTGACCAGCCGTGTAGAAGAAGACAGCAACAG  
AGATTATAAAAAAGTAGGGTCTTTATTCAATTTTCCGGTTCTTTGGTGACATGTAAACCT  
CTCAGCCTTCCTCCACCACACCC

>754

GAAAACAAAACCTTCAGGAAGCCCAGCTAGAGCTAGCAGATATAAAGTCCAAGCTTGA  
GAAGGTGGCCCAGGTAAGACGGAAGAAGAAGAAAAAAGATGAGAACCAAGGGTTGA  
TGTAAGGAAGCAAACCTAGACTAGGGAT

>755

GCAGGGCCCAGGCGCCCTTGGCCTTAGGACCCAACTTCTCTTACCGCCATGGAGTTCG  
ACCTGGGAGCAGGTGAGCTCCTGGGGAGTGAGGACTGGAGGTGCAGGGGGCCGGAC  
TCAAGCCCAGAAGCTGCCTGCACCAA

>756

GGGAGATCCCAAGCTCAGTCCCCACAAAGTTCAGGGCCGGTCGGAGGCAGGGGCAGG  
TCCGGGTCCAAAGGTAAGTCGCCTCATCACCGGCTGCGGAGGGGCGGGAAGGCTGGG  
GTTGCCCTGACCCCAGGGTCCTGCC

>757

GCGCGGCCACAGCATGACCGCTCGCGGCCTGGCCCTTGGCCTCCTCCTGCTGCTACTG  
TGTCAGCGCAGGTGAGCGGTGCGCGGCCACCGGGACGCCCTGTGGGGACGTGGCGG  
GGCCGAGAGCCGGGGAAGGCGACGG

>758

CAAGAGGTACAATTGCGAATATTCTGGCCCAACAAAACCATTGCCAAAGGATGGATATG

ACTTAGTGCAGGTAAGTTCATTATCTTAGGCACTGGGAACACAAAATGCTGATCACAA  
GATCCTCTGTAATTATTCCTTAA

>759

TCTGTTGTGATGTTTCGGCAGCTTCAGACACTAAAAGACAACCTGCAGCTGCCTCTACA  
GTTTCTGTCCAGGTAGGTTCTGCTGGGGAAACAGAACAACCTGGGCTGTAGATACTTGT  
GAACTGGTAATGCTCAGCTTTCCA

>760

CCTGTTACAAACCAGACGAAAACAAATGTGAAAGAGTTACAATACTACGTCGGACAG  
AGTTTTGCCAATGGTAAGTAACTTTTAATTATTCCTCTTTTACAGCTGGCATCAGGACA  
GCAGAGCAAATTGTTTCCTTTTAG

>761

AACTGGATTGAATACATGTTCAATAAGGACAATGGACAGGCACCTTTTACCATCACTCC  
TGTGTTTTTCAGGTAGGTATAAAGATTCCAAGTTTGGTGTGTTTATGATATTGTTTTAAAG  
CCAAGGAACTGGCTGGGCACA

>762

TCATGTGGATCACCTACATGGCGTTTTTGCTTGTGTTTTTTGGAGCATTTTTTGCAGTGT  
GGTGCTACAGGTAAGCAGTTTTGTGTTGTCATCCAGGGCAAAAAGAGCAAAATTGCCCA  
CTGGCACTTTGAGCTTTCATTT

>763

CGGTATTTTGTCTCCGAGTACACTCCCATCGATAGCAATATAGCTTTTTCTGTTAATGCA  
AGTGACAAAGGTAGGCATATTTGTCCATGAATAAAAGGGTTCAGATGATGCTGTCTGTC  
ATGAGAGCATTCGTTTCCTCA

>764

TTACCAGCCATACCCCTTCGGGAGCTGATGTACCCTTTGGACCTCCGCTTGACATACAGA  
TACTGCACCAGGTAACCTGCTGTTTGAAGAAATAAGTCACTCTAGATGACCTTGTGGTT  
TGCTGGCTTTTACATGTTGACT

>765

TGGACCACAAGAAAGGGGACGACTTCTTTGTGTATGCCGATTACCACACGCACTTTCT  
GTACTGCGTACGGTAAGTGGCAAGAGACAATCATTGGTAGACACCATTCTTGGGTCTG  
ACTTAGGGTACATGGGCAAAAGCT

>766

CTCCATGACCCTTGTCTGGGTACGTTTGGTGGACCAGTGTTCCCGTGGCTTGTGTTGGG  
AGGCTATGATGGTAAGTAAGAGAAGCTTTGACTTTTCCTTTTAGATAAAGTCATCTCGG  
TTTTGTCATTAGCATCAAGTGG

>767

TTACCTTCCCTGTCAATAATTACTATAATGATACAGAGAAGCTCCAGAGGGCCCAGGCC  
TGGGAAAAAGAGTGAGTCACTCATGGGTGTGAGCAGACTGTCCTTGCATTGTGGGAA  
GCTAGACACTTGCAGCAAGCACTT

>768

TAGCTATGCCATCATGTTTCTATATATTTCCCTAGCCTTGGGGCACATCAAAAGCTGTG  
CAGGCTTCTGGTAAGCCGGGGGGGGGTGGTGTATGTTCTAGAGGTAAACAGCAGTGCA  
CAGTGTAACGTCATATTTTTGC

>769

TGAAGTCATCCCGTTCCTGGTGCTGGCTGTTGGAGTGGACAACATCTTCATTCTGGTG

AGGCCTACCAGGTATACTTCCATATTCTCACAGGGCTCAGCATCTGTTCAAGTTTCAGG  
GACTGTGAATGGCTCCTGGGCT

>770

AGGGTCCTAGGAGAAGTGGCTCCCAGTATGTTTCCTGTCATCCTTTTCTGAGACTGTAGC  
ATTTTCTTAGGTAATTATGCTTTCATCCTACCAGTCCTGTAGTCTGCTGAGCCTGGAG  
AAAGAAGGAGCTGGCTACCTG

>771

CTTCATTGACTTTCTTCTGCAGATTACCTGTTTCGTGAGTCTCTTGGGGTTAGACATTAA  
ACGTCAAGAGGTAAGTTGGTGCCAGGATTATAGTCTATTTAATTTGAGTCTAGAATCTA  
GAGGAAGCAGCTAGCGGGTAT

>772

CTGTTTGTTCGCTTCTTCAAAAACCTCCTATTCTCCACTTCTGCTAAAGGACTGGATGA  
GACCAATTGTGGTATGCGCTTATCTGTGGTTTTTCTCTTTCCTCTCACTGAAACAGATTA  
TCACATGCCTTCTAAGAAGCC

>773

TCTGTCATTGAGCATCGCAGTCCTGAACAAAGTAGATATTGGATTGGATCAGTCTCTTT  
CGATGCCAGATGTAAGATGACTTCCTTTTTTTTTTTTTTTAACTTCTTTAGCTGATGATGA  
ATACATTTTTCAAAACATGC

>774

GCGGCGGCATGGGCTGCAACAATGATTCCCTGGTGCAGCAGATATTTAACGCGGCGCA  
GCTGGACAACCTAGTCAGTACCACCTTGCTTGTACTTCAGAAGCAGCGGAGGAGGCTC  
TCAGCCAGGCAGTCAGCTCAGGCC

>775

AGGGGGGAGACTTCATGAGATTCCCTGCCCATGTTCCCTTTCGGATAACCCTAACCCCAAG  
TGTGGCAAAGGGTAAGTGCTGCCATTGCAGATAAGCATCCACTGCAACTTTAATTT  
GCAGTAGAAAACCTAGGAGAGGA

>776

GACTTATAGCCAGTAATGTCACCGAAACCATGGGCATTAACGGCAGTGCCTACCGAGTA  
TTTCCTTACAGGTAAAGCCTGCCCTTTTTCAATGGGGTTTACCCAGCAAAGGGCCTACA  
CTGGGTGGGAGTGGGGAGGGTT

>777

CAACATGTTTGGAGTTATGTGGCTCTGGGGCATCAGTCTGAACGCTGTATCCTTGGTCA  
ACCTGGTGATGGTGAGTCCTCATAAGTCTCAGTTTGTCCCTAGCTCCTGTTTCACTTG  
GGGAATTGGCTGTCTTAGATT

>778

GTTACGGTGAGCATGAAAGGCAGCCGCGTGGAGCGCGCGGAAGAGGCACTTGCCCA  
CATGGGCAGCTCCGTGAGTACCCTGAGCAGGGCCACGCCGGCAGAGTCGCACCACAA  
AGTAATCCTGGTCACTGGCTGAAGAG

>779

TATTTGGCCATGGTCTTACTGGGAGCCACTCACGGATTAATATTTCTCCCTGTCTTACTC  
AGTTACATAGGTAAGAGTTCTCATCTTAAAAGGGTGGCACAATGGAAGGACATTACTG  
AAAGGGAATTCTATCCTGAGGC

>780

AATTGGCGGGCAACGACCTTTCTTTTATCCACCCAAAGGCCTTGTCTGGGTTGAAAGA

ACTCAAAGTTCTGTAAGTAATGCAATTTTAGAGTTTCACAGCTGGCTGTGTATTTTCTTT  
CTGCGTAGTCAACATGCTTGGA

>781

CGCTCCAGAATAATCAGTTGAAAACAGTACCCAGTGAAGCCATTCGAGGGCTGAGTGC  
TTTGCACTCTTTGTAAGTAACTTCTTGGTTTCTTGACTCACCAAGAGACTACTCTGGCT  
GTAAAGATGTAAATAACTAGAA

>782

CCCTGGCTCTCAACAAGATCTCAAGCATCCCTGACTTTGCATTTACCAACCTTTCAAGC  
CTGGTAGTTCTGTAAGTATCTATCCCTTTTAATTCCATATATTTGTGTAAATTGGGGTACA  
AAACAGATTTCTTCTGACA

>783

ATCTTCATAACAATAAAATTAGAGGCCTGAGTCAACACTGTTTTGATGGACTAGATAAC  
CTGGAGACCTTGTAAGTATTCATATTTGGGCAACTGCATTGTGATATTGAAAGTATA  
ATTTTATACTTCACTGCAGAA

>784

GATTTCATAGTAATTCTATTTCTGTTATCCCTGATGGAGCATTTGATGGTAATCCACTCTT  
AAGAACTATGTAAGTATTTTTGAAAGTTTCTTTTAATGTATAATTATGTGAAGCTGTGTC  
CGTACAATGCCAAACACCC

>785

ATTTGTATGATAATCCTCTGTCTTTTGTGGGGAACTCAGCATTTCACAATTTATCTGATCT  
TCATTCCCTGTAAGTATGTGAATTTAAAAACAAACCTGGATATTTATACAGTTGTTTTAG  
TGAAAACAAGAATTTATT

>786

CTTTACAGCGTAATCAAATCTACCAAATAAAGGAAGGCACCTTTCAAGGCCTGATATCT  
CTAAGGATTCTGTAAGTTTGTCTATGATTATTAAAGACAATAAATTTTTTCCAAACTATGT  
TAATATGTTGTTATGATTTC

>787

ATCTGAGTAGAAACCTGATACATGAAATTCACAGTAGAGCTTTTGCCACACTTGGGCCA  
ATAACTAACCTGTAAGTGGATGATTATGCAGTAATGTCATGAAAGTAGTAACTAGTGCTA  
TAGAAACATCTGTTTTAACAT

>788

ATCAACTGAAACTTGTGGGCAACTTCAAGCTGAAAGAAGCCTTAGCAGCAAAAGACT  
TTGTTAACCTCAGGTGGTTTTGCTTTTTCTTTTTTGTGGAAGTTATGGTAGGCTCCAAA  
TTACAGAGTGTCTGGTTTTTTG

>789

GCAAATGTCACAAGCACTCTTGAAAATGAAGAACATAGTCAAATAATTATCCATTGTAC  
ACCTTCAACAGGTATGCCTGGCCTATTTTTTCACAGTTACCCATGTTAAACAAACATTAG  
GCAAATATATCTAAATGTCCT

>790

CCCTAAACCCAGTGCAAACAGTGTAACGTCACCCCACTCCAAAGAGAAAAGAATGCC  
CTTCTTTAAGAAGGTAACATTAACCTCCAAGCTCCCATGTCCACCTGCTCAACTGCAC  
TGCGTCACATTTCTAGTCCTGTTG

>791

TCCTCCGTATGATGTGGTACCTTCCATGCGACCAGTGGTCCTAGTGGGCCCTTCTCTGA



AGGGCTACGAGGTGGGTAGCAGCCTTCCACAGGAAGCTTAACTTGCATGCTGAACTTC  
TTTGTGATGCTGCCTCCTACTCC

>792

AAACGCTCGGTATTAAACAATCCCAGTAAGCACGCAATAAGAAAGATCCAACACAA  
GGTCAAGCTTAGGTAAGTCTGTGCAATGAGCTTAAGCTTTTTAAACTCTCCTCTCCCGA  
TGTTGATGATGAGAAGACCTAAC

>793

TCATCCAGCTCAACTCAGTAAAACCTCCTTGGCCCCATTATAGTATATGTAAAGATTTC  
TTCTCCTAAGGTAAGTAGGACTGCTACTGTTTGCTCTATAATCAAACCTTTCCTAAAATGT  
ATTTTATGTTCTGCTTTCTA

>794

AGGGAAATCTCAAGCTAAACACCTCAACGTCCAGATGGTAGCAGCTGATAAACTGGCT  
CAGTGTCCCTCCAGTAAGTTATCTCTATATACAGCATAATCCAGTTACAGAGATCAGACCT  
TTTTTTTTTTTTTTTTTTTTTTTT

>795

CCCTCTCCTTAGCCGTACATTAGCCACTTCAAGTCTGCCTCTTAGCCCCACCCTAGCCTC  
TAATTCACAGGTAAGGGGAGTTTTTATATATATCTATATATACAATCTTCATAGAAAAAAG  
GTTGCCTATGGTGACACCT

>796

GGGCCCCCTCCTCCTCCTCCTGCTGCTGCTGCTGCTGCCACGGGGGTTCCAGCCCC  
AGCCTGGCGGGGTGAGCACTGACCTTGTCGCAGTGCGCACAGAGGTTCCAGTGGCT  
ACTTGGGAGGAGGCCAGAGGGAGG

>797

GGACCCCAAAGTGGGGGGCTCCCGCCCCCGCCAGGGCAGTTCCCTCGAGCAGTAGC  
CCCCAGGCCCAAGGTGGGTCAGGTGGGCCTGGGAGGAGGTGTCGTGCTTCACCTTAG  
GGCTGGGTGGGAGGAGCATGGCTGCG

>798

GGTTCCCTTCCGCTACGGGGGCCGCATGCTGCATGCCTGCACTTCGGAGGGCAGTGC  
ACACAGGAAGTGGTGGGTCCGGGCAGCCGGGGCACCCGAGCTGGGGTCACCTGCCCC  
ACGCTGCCTGCTTTTCTGGGAGCCG

>799

ACTCACAACCTACGACCGGGACAGGGCCTGGGGCTACTGTGTGGAGGCCACCCCGCCT  
CCAGGGGGCCCAGGTGGGTGCTGGGTTGGGTAGCCTGGGGCGAGCAGGGGGCACTGG  
GCCAGGCCAGAAGGGCCAAGGGGAGG

>800

AATACCCAGGACCCCCAGTCCTATCACTGCAGCTGCCCCCGGGCCTTCACCGGCAAGG  
ACTGCGGCACAGGTGAGCTGGGCCCCGAGGTCCGCAGGGTCCAGGGGGCCGGAGCAA  
GTCCCGGAGGATGGGAGAACAGGTGG

>801

CGCCAGGGCCACGTGGAACAGTGCGAGTGCTTCGGGGGGCCGGACCTGGTGCGAAGGC  
ACCCGACATACAGGTGCGCCACGGGGTGTGAGCCGTGCCACTGACCCCTGACGGGTG  
TCCCTGTCCACACCCGAGTGGGAGGA

>802

CTGATCGTGGCCACCGGGACCACCGTGTGTGCCTGCCCACCAGGCTTCGCTGGACGGC

TCTGCAACATCGGTGAGTGGGTCAGCCCCCGGGGTGCCCTGGGGCAGTGCCGGGTG  
GACCCACCGTGGGCCGGCCTCACTG

>803

ACCAGGAGCTGCACGTGGACTCCGTGGGCGCCGCGGCCCTGCTGGGCCTGGGCCCC  
ATGCCTACTGCCGGTCAGCACCAACGCCGCTCCAGGCCGCCGCACGCGGGGCAGGCA  
GGATTTTTCCTGGTGAGAGGCCCCCC

>804

GAGAGGCCCTGGTGCTACGTGGTGAAGGACAGCGCGCTCTCCTGGGAGTACTGCCGC  
CTGGAGGCCTGCGGTGCGCGGCTGGCGGGGGGTGCTGCCTTGGGCCCCACCGAGGTC  
ACAGCAGTTTTCCCCGTGATCCTCCT

>805

ACAGCTTCTGCGCCGGGAGCCTGGTCCACACCTGCTGGGTGGTGTGCGCCGCCCACTG  
CTTCTCCACAGGTGCACCTCCTCTGGGCCCCAGTCACCTGCCCTGAGGCCCCACACA  
CCATCCAGCGTCACTATGCGCCTG

>806

ACCTTCGGCATCGAGAAGTACATCCCGTACACCCTGTACTCGGTGTTCAACCCCAGCG  
ACCACGACCTCGGTGAGCTCCGGCGTGTCTGTGGCTGCACTCTGGGCAGGTGGGCCCT  
GTGCTCCCCAGGCCAGGCCAGACA

>807

CCCGAGCCCGGCAGCACCTTCCCCGCAGGACACAAGTGCCAGATTGCGGGCTGGGGC  
CACTTGGATGAGAGTGAGTTGGGAGGGGGCGCCAGCGTCCGCCAGGTGGACAGGT  
GGCCAGCCACAGTGTGGTGTCACGCT

>808

CTACGGCGCCGACATCAGCCCCAACATGCTCTGTGCCGGCTACTTCGACTGCAAGTCC  
GACGCCTGCCAGGTGAGCTGGTGCCCGCCCCACCAGGACCCGACTGGTGGGGGCTCA  
GCTGGTCTTGAGTCTCCGAGATGCT

>809

ACCTCAGCCATGAGACTTCTCATCCTGGCCCTCCTTGGCATCTGCTCTCTCACTGCATA  
CATTTGTGGAAGGTAAGTGGAGAAGCTGTCTGTGAGATAAAGAATAGGGAGGCAAGGC  
AGGTGGGCACACATTTTGGGTTTG

>810

CTACCCAGCGACTGCCAGTTAGCAGAATCAAGACCTACACCATCACGGAAGGCTCCTT  
GAGAGCAGTAATGTGAGTCTGCCTCCTCAGAAGTTGGGCTGGGTGGGTACCTAGAGGT  
ATAGAAATACACTCTATAGAAATG

>811

ACCTCAGCCATGAGACTTCTCATCCTGGCCCTCCTTGGCATCTGCTCTCTCACTGCATA  
CATTTGTGGAAGGTAAGTGGAGAAGCTGTCTGTGAGATAAAGAACAGGGAGGCAAGGC  
AGGTGGGCACACATTTTGGGTTTG

>812

CTACCCAGCGACTGCCGGTTAGCAGAATCAAGACCTACACCATCACGGAAGGCTCCTT  
GAGAGCAGTAATGTGAGTCTGCCTCCTCAGAAGTTGTGCTGGGTGGGTATCTAGAAGT  
ATAGAAATACACTCTGTAGAAATG

>813

CCCCAAGCCAAGCCCTCCAACCCCAGTAACCCTCGAGTCTTCTTTGACGTGGACATCG

GAGGGGAGCGAGGTGAGCGGAGTCTGACGCTCGCGGAAAAGCCCCGAGGAGGCGGG  
GGTTCCCGGGATTGTTGGGGATTCCAA

>814

ACAGGAGAAAAAGGCATTGGACACACGACTGGGAAACCTCTCCATTTCAAAGGATGC  
CCTTTTCATCGAAGTATGTGTAAATTTTCTTAATCTTGTTATTCTTCATACAGACAAGTCC  
TGTTCTTTAGGATTTGGGGAAG

>815

AAATCAGAATGGGACAGGTGGAGAAAGTATTTATGGTGAAAAATTTGAAGATGAAAAT  
TTCCATTACAAGGTAAAGTAGAGAAAATGCATGTTATTGCTGATAAAAAGATTGTTATAT  
ATCTGGAATACTTGTTGGATTA

>816

AGTAATTAAAGGAATAGGAGTGGCAAGGATATTGGAAAATGTGGAAGTGAAAGGTGA  
AAAACCTGCTAAAGTAAGTAAAAAGTTACAGTGAAATACACTTATTATCTTAGTTGCTA  
TCTTTTTGAGACGGAGTCTCGATC

>817

ACATTGGAAATACTTTTTTCAAATCCCAGAACTGGGAGATGGCTATTAAAAAATATGCA  
GAAGTTTAAAGGTAATATTATTTCTAACAAATTATTTTTAAGAAATTATAAATTGAATTAT  
AAACTAAAATTAAGAATTGC

>818

TGTACTGAATATTGGTGCTTGTAAACTGAAGATGTCAAATTGGCAGGGAGCAATTGACA  
GTTGTTTAGAGGTAAGTCTGTTTGATTTGAACTTTTTGAATAAGTTGGATTAAGACTTA  
GTTTGAATAGTAGCAACTTTT

>819

ATCAAATACCAAAGCATTGTACCGCAGAGCTCAAGGATGGCAAGGATTAAAAGAATAT  
GATCAAGCATTGGTAAATTTTGTTCCAAATGTTTAATTTTTTAAAATAGACAACCTACCTT  
TATAAATCATACACCTAACTTA

>820

CAATCAAAACCTTCCTTGGGGATACAAACACACCTTGAACCAGATTGATGAAGTAAAG  
GTGTGGCCTCAGGTAAGTGGACCTGCTGTCTATGAGCTGAAATAATGTGTACATGGAGC  
TCAATCAGGTGCCTCAAAAATC

>821

GGAAACCACCTGCCATGTGCTGGACCCACCCCTGTGGCAAGATGCAGCGTGAGGCA  
GCTGAAGGAGCATGTGAGTACCCTTCTTAGGATGACTGTAGGTGGCCCTTCGGCCAGC  
TCCACCGATTACCCAGCGTCTCAG

>822

TGTGATTTCCAGCTGTTGAAACTAGATGGCAAGTTTTCCGTGGTATACGCAAAATGTGA  
TTCCAGTCCAGGTACAGATGACTATTCTTATTCTCATTTTTTCCTTGTAGAGAAAGTGGG  
GAAGGGATCTGAATAATTTTC

>823

GGCCGCCTTCAACGCTCAGAACAACGGCTCCAATTTTCAGCTGGAGGAAATTTCCCGG  
GCTCAGCTTGTGGTAAAGACTGAGATTCTTTTGACAGGTTGGGCAGTTCGGTGGCACT  
TCGGGAATGTACTGTACGTGGTGG

>824

AGTGTGTGGCACTGACTGTGTTGCTAAAGAGGCCACAGAGGCAGCCAAGTGTAACCT

GCTGGCAGAAAAGGTGAGTGGGCCGGGACCTTGGGGTGTTACCACTCGGACAGAGCT  
GTTTGTGGAACAGAACATCCTTGGTT

>825

TAAGGCAACACTCAGTGAGAAGCTTGGTGGGGCAGAGGTTGCAGTGACCTGCACGGT  
GTTCCAAACACAGGTAACAGCTCCGTGAATATTCTTGCCTACACCTTCAGAATACAATG  
ACCCCTTCACATTTATGCAGTGCA

>826

TGTCATCAAAGGATATTCCAGATTCTTGACAGCATTCTCGTCATCTCTGAGGACATCAC  
CATCATCTCAGGTGAGCACCAGGTGGAGTGCCTCTGGGTGACTGGCCGGTTTGGAGCA  
GGGAGGGAGGCTTAGAGTCTCAT

>827

AGCCTTCAACATCCAGACATTTGGGGAGACCAAGATGTCCAATGCCACCCTCGTCAGC  
TACATTGTGCAGGTGAGGCCAGGGCAGCCTCCCCCAAAGCAGAGGAGCTCTGGAG  
TCTAGGGCTGGTGGGCAGGGCCAGC

>828

TCGCCCTGGTCCAGGAGGTCAGAGACAGCCACCTGACTGCCGTGGGGAAGCTGCTGG  
ACAACCTCAATCAGTGGGTGACAGTGGCAGGGTCATAGGAAGGTGACATCTCGTCCAC  
GGCACAGCCTCACTTCACTTGGGCC

>829

CCTATCACTACGTGGTGAGTGAGCCACTGGGACGGAACAGCTATAAGGAGCGCTACCT  
GTTTCGTGTACAGGTGGGTGGTCTAGAAAGCCAGGAAGCCCCCTCCCTCACCTGGGAGG  
GCCCCAACAGAGCAGGGAAGTAGTT

>830

TGCGAGCCCTGCGGGAACGACACCTTCAACCGAGAGCCAGCCATTGTCAGGTTCTTCT  
CCCGGTTACAGGTGGGTGCTGCCTGGGCCAGGGTGGGGCTCGGCTTGGCGCTTATGG  
CCTCCACCCCCTCCTAGGGAACCT

>831

GGACGCAGTAGCCGAGATCGACGCTCTCTATGACGTCTACCTGGATGTCCAAGAGAAA  
TGGGGCTTGGAGGTGAGGCCCTCCAGGGGCAGTGGGCACCAGCGGCCTCCGCATGT  
CCCAGGGCCACAGGCAGCGTTTCCT

>832

CCACCTTCCAGTGGCTGATCCCCGACAGCGCTGACACCACAGCTACACCCACGCACTG  
TGCCTATGACAGGTGAGCAGGGCCTCGCGCTTAGGGCAGACTGAGGGCACCTCCAAG  
GGCAGCCGTGACTCATAGGTCCGGC

>833

AGGCGCCGTTGTTCCCGACTCGGCTCTTCCCTTTAACTTCCAGGCTGCCTATGGCCTGA  
GTGACCAACTGGTATGTGTCCTCCCTTGCACAGCCACATGAGGATGGGACACAGGAGC  
TCAGGTAGGCTCAGCCCAGACCC

>834

CACGAAGAAGAGAAAACCTGGGGAAGAACCCAGACGTTGACACAAGCTTCTTGCCTGA  
TCGAGACCGTGAGGTAAAGGCTGCCTGGCCCTGACCCCGGCCTCGACTCCAGCCCTG  
GTGGAGACCCTTGCTTAGGGAGCCAG

>835

AGGGCAACACCATGCAGCAGTTCCTGCAGAAGGCGCTCGAGATCCTTCGGAAAGACT

TCAGTGAGCTGAGGTGTGAGGTGTGCGTGTGTGCACGGTGGTGTGTGTGGCACCTGTG  
GCTCCAGCCCGGGTGCCAGACACCC

>836

ACCACTCTTCAACTTTGATGTTTCATGACGATGTGCGGTTGCTCAGTGACGCCACTGTGG  
AGAAGGATGAGGTACAGCGTAGGGGGCCGTGTGAGGGGGAACGGGTGTCCCTGGGCT  
ATGGAGGAGAAGCCAAGGGAAGGG

>837

GAACAAGCACATCTTTCCCGCCAGCCGCTGGGAACCCCTACGACCCTGAAAAGAAGTG  
GGACAAGTACACGGTGAGGAGGGGCTGGCAGGGACCCCTCCAAGTTGGGGACGGCA  
GCCAGCCCCTGCTCACCCCTCGCCTTC

>838

GCATTTTGACACCCTCTCTAAGGGTGAGCTGAAGCAGCTGCTTACAAAGGAGCTTGCA  
AACACCATCAAGGTAGGTGATGCCCCTCTCACTGCAAACCTTGCCCATGACCCTGCACT  
GAGGGGAGTGGCAAGGCCTGGCAG

>839

CTGGTCATGGCGCCCCGAACCGTCCTCCTGCTGCTCTCGGCGGCCCTGGCCCTGACCG  
AGACCTGGGCCCGGTGAGTGCGGGTCGGGAGGGAAATGGCCTCTGCCGGGAGGAGCG  
AGGGGACCGCAGGCGGGGGCGCAGGA

>840

AAGACCAACACACAGACTGACCGAGAGAGCCTGCGGAACCTGCGCGGCTACTACAAC  
CAGAGCGAGGCCCGGTGAGTGACCCCGGCCCGGGGCGCAGGTCACGACTCCCCATCCC  
CCACGGACGGCCCCGGGTCGCCCCGAG

>841

CTGGAGGGCACGTGCGTGAGGTGGCTCCGCAGATACCTGGAGAACGGGAAGGACACG  
CTGGAGCGCGCGGGTACCAGGGGCAGTGGGGAGCCTTCCCCATCTCCTATAGGTCGCC  
GGGGATGGCCTCCCACGAGAAGAGG

>842

CTGGCTGTCCTAGCAGTTGTGGTCATCGGAGCTGTGGTCGCTGCTGTGATGTGTAGGA  
GGAAGAGCTCAGGTAGGGAAGGGGTGAGGGGTGGGGTCTGGGTTTTCTTGTCCCACT  
GGGGGTTTCAAGCCCCAGGTAGAAG

>843

CGGGTCATGGCGCCCCGAGCCCTCCTCCTGCTGCTCTCGGGAGGCCTGGCCCTGACCG  
AGACCTGGGCCTGTGAGTGCGGGGTGGGAGGGAAGCGGCCTCTGCGGAGAGGAGC  
GAGGGGCCCCGCGCGAGGGCGCAG

>844

AAGCGCCAGGCACAGGCTGACCGAGTGAGCCTGCGGAACCTGCGCGGCTACTACAAC  
CAGAGCGAGGACGGTGAGTGACCCCGGCCCGGGGCGCAGGTCACGACCCCTCCCCAT  
CCCCACGGACGGCCCCGGGTCGCCCC

>845

CTGGAGGGCACGTGCGTGAGGTGGCTCCGCAGATACCTGGAGAACGGGAAGGAGACG  
CTGCAGCGCGCAGGTACCAGGGGCAGTGGGGAGCCTTCCCCATCTCCTATAGATCTCC  
CGGGATGGCCTCCCACGAGGAGGGG

>846

GGACAAGAGCAGAGATACACGTGCCATATGCAGCACGAGGGGCTGCAAGAGCCCCCTC

ACCCTGAGCTGGGGTAAGGAGGGGAATGGGGGGTCACATCTCTTATCAGAGAAAGCA  
GAAGTCCTTCTGGAGCCCTTCAGCCG

>847

GCTGTCCTGGTTGTCCTAGCTGTCCTTGGAGCTGTGGTCACCGCTATGATGTGTAGGAG  
GAAGAGCTCAGGTAGGGAAGGGGTGAAGAGCGGGGTCTGGGTTTTCTTGTCCCCTG  
GGAGTTTCAAGCCCCAGGTAGAAG

>848

GTGTGGCCCTGATGTGGGCCGCCAGACCGTGGGCGCTTGGGCTTCCAGGTCTGGCTG  
AAGAATGGCGTGGTGAGTGGCACCCCTGGGCTAGGGCGCTGGGGGGCTGGGGTGTGAC  
CCCCTGTGAGTCCTGGGCCAATCCC

>849

TTCCTGAAGGCGGCTGAGGACTATGGGGTCATCAAGACTGACATGTTCCAGACTGTTG  
ACCTCTTTGAAGGTAGAGAGGAGAATGCTGGGGGAGGAGGTGGGCAGGAGGACAGG  
GTGCTGGGACAGGGAGAGGGTATGAC

>850

TGGCTTTGGGCAGCTTGGCAGTGACCAAGAATGATGGGCACTACCGTGGAGATCCCAA  
CTGTTTTATGAAGTATGTGGCCCCCAGGGAGCTTGAGTCTCCGCATGGGGTGGGAGGT  
GGCTTGTCTAAGGAGCTTGCGGG

>851

ATCGCTGAGGCCTACGACGTGCTCAGCGACCCGCGCAAGCGCGAGATCTTCGACCGCT  
ACGGGGAGGAAGGTGTGTGCTCGCGGCCAGGGGCGCGGCCCCGCCTTTTGACAGACA  
GGGAAACTGAGGCACGCTGGCCCCCT

>852

CAAGCCCCACAATATCTTTAAGAGAGATGGCTCTGATGTCATTTATCCTGCCAGGATCA  
GCCTCCGGGAGGTAAGGTGCCAGGTGGGGCGGTGTCTGTAGAGGGCGATGGCTGCTT  
TTTGAAGCAGTTTAGTATTTGCTG

>853

ACTCCTCCCTGTGAACTCGGGCTCGAAAATGAGACGCTTTTCTGCTTGGATCAGCCCC  
GTCCTTCCAAAGGTAAGTGTGGAAGCTGTTATTTTAATTCAGGAACTATTGAGTTGT  
GGGAGAAATCAGCAAAGGCAAGG

>854

CTCATCCCCAATCTGCTCAAGGATTTTCATCTTCGGGAGCGCCGTTTGCAAGACCACCAC  
CTACTTCATGGGTAAGTTGCTGCTGGTGACTCTTTCTGGAGCTTGCCCCAGACCCCACT  
CAGCCCCAGACCTTCCCAAACC

>855

CCAAAAATAACAACCAGACCGCGAATATGTGCCGCTTTCTACTGCCAAATGATGTTATG  
CAGCAGTCCTGGTAAGGTTGCATTGTTTATTTTAAAAATACAGCTTGATGTAATTTTGC  
AATATCATGAAAACTGAGAT

>856

TATGGATTAATCTCTTTGGAACCTCTACCAGGGAATAAAATTTGAGGCTAGCCAGAAGAA  
GTCTGCTAAAGGTAAGTATCTTGTAGCTGTGTGTTTATGCCAAATGAGCACAAAAGCTT  
GTTTTCTATCATTTAAATAGAT

>857

GCGCAGGGTCGCGATGCTGCCCCGTTTGGCACTGCTCCTGCTGGCCGCCTGGACGGCT

CGGGCGCTGGAGGTGGGTGCCGCGCCTCGGAAGGCGGGGGGAGGCTGCACGGTGGG  
GACGCGATACCCCCCAAGACCTTAAC

>858

GGATTGAGATCCATCAGGGACCAAAACCTGCATTGATACCAAGGAAGGCATCCTGCAG  
TATTGCCAAGAAGTAAGTCCTGTCCGGTGGCTAGCAATTCACGTTGGATCACATGCATT  
TGTTTTCAAAAAATTAACTTCT

>859

AACTGGTGCAAGCGGGGCCGCAAGCAGTGCAAGACCCATCCCCACTTTGTGATTCCCT  
ACCGCTGCTTAGGTGAGCCGGCCGGCCGTGGGGCTGGTGTGATTGGGGGCCTGGTCT  
TGAGGGAAGAAAAAGAGGATGCTC

>860

CAAATTCTTACACCAGGAGAGGATGGATGTTTGCGAACTCATCTTCACTGGCACACC  
GTCGCCAAAGAGGTACCAGCCATAAATCTTTCTTATTGCAAAGTGAAGATTTCCTGG  
GGACGTGCTTAATGGCATTTTAG

>861

CTGCTGATGCGGAGGAGGATGACTCGGATGTCTGGTGGGGCGGAGCAGACACAGACT  
ATGCAGATGGGAGGTAAGGTGGCCTTTGTGTTTCAGCCTCAGAGATGCTGAAACATCTT  
GTATGGAGTATTTGTATCCTGTAAA

>862

ACAGAGAGAACCACCAGCATTGCCACCACCACCACCACCACCACAGAGTCTGTGGAA  
GAGGTGGTTCGAGGTAATCCACCATTGTGCTTGGATTCCCCCACCCEAAGGAAAAGA  
AAGCGTAATACCAGAGTTGGAAATA

>863

GGCGGATGTGGCGGCAACCGGAACAACCTTTGACACAGAAGAGTACTGCATGGCCGTG  
TGTGGCAGCGCCAGTAAGTGGACCCTTCTTCGAGCCTGGCCACCTTTCGTCTCTCTCG  
CCACTGACTCTGCTTTTTGTAAACAG

>864

GAATGAACATGCCCATTTCCAGAAAGCCAAAGAGAGGCTTGAGGCCAAGCACCGAGA  
GAGAATGTCCCAGGTAAGTCTGGCTCTTCCATCATTACGCCCTACGATATTGGGAAACC  
TGAGCTTGCCTCTGCCTCAGTCTC

>865

GAGAGAATGGGAAGAGGCAGAACGTCAAGCAAAGAACTTGCCTAAAGCTGATAAGA  
AGGCAGTTATCCAGGTAAACCTGAACCCATTCTCTACCAAACATCACATGCCAGCAG  
TCTTTTTAATGAGTGTCTGCAGGTTT

>866

CATGCTCAATGACCGCCGCCGCTGGCCCTGGAGAACTACATCACCGCTCTGCAGGCT  
GTTCTCTCTCGGGTAGGTCTCGCTGCAGCCGAGTTCACACTTCAGGTCACAGCACAGA  
CAGTAAGGGTGGGGCACTGGGAAC

>867

GCACACCCTAAAGCATTTTCGAGCATGTGCGCATGGTGGATCCCAAGAAAGCCGCTCAG  
ATCCGGTCCCAGGTAAGCGTGGGGTATAATCATCTTCTGCAGCTTTGACAATCCAGGAT  
TCTTGCTTCTTGGGTTGGTGACA

>868

CGCATGAATCAGTCTCTCTCCCTGCTCTACAACGTGCCTGCAGTGGCCGAGGAGATTC

AGGATGAAGTTGGTAAGTAAGCTGTTCTTTTGATGCTGCACATGGACATGTATTTTCCC  
CCAGAGGAAAATTGAGGAAGTGA

>869

AGCCTGGACGATCTCCAGCCGTGGCATTCTTTTGGGGCTGACTCTGTGCCAGCCAACA  
CAGAAAACGAAGGTAAGAGTCCCCTGAGCCAGCAAGGGCGTTCTGGGAGGTATATATA  
CACATACATAACGTGTGTGCAAGA

>870

GATCTCTGAAGTGAAGATGGATGCAGAAATCCGACATGACTCAGGATATGAAGTTCATC  
ATCAAAAATTGGTACGTAAAATAATTTACCTCTTTCCACTACTGTTTGTCTTGCCAAATG  
ACCTATTAACCTCTGGTTCATC

>871

AGTGATCGTCATCACCTTGGTGATGCTGAAGAAGAAACAGTACACATCCATTCATCATG  
GTGTGGTGGAGGTAGGTAAACTTGACTGCATGTTTCCAAGTGGAATTAAGACTATGA  
GAGAATTAGGCTTAGCTTTTTGC

>872

TTGACATCTGACGACGTGAAGGAGCAGATTTACAACTGGCCAAGAAGGGCCTTACTC  
CTTCACAGATCGGTGAGTGTTTGTGTCTAACATAGCCTATTTTCGCTGTCTCGTGTGA  
CTTGTAGGATCTAGTAGGTGGTA

>873

TCCTGAAGATCTCTACCATTTAATTAAGAAAGCAGTTGCTGTTTCGAAAGCATCTTGAGA  
GGAACAGAAAGGTAAGCTAATAAATAAAACCTGGTGCTAAGTAGGACTGCTTGACTA  
AATTTTTTCGGTAAAATGTAATG

>874

TAGAGAGCCGGATTACCGTTTGGCTCGATATTATAAGACCAAGCGAGTCCTCCCTCCC  
AATTGGAAATAGTAAGTATCAACTCTTTTGTGCTTGTTATCAAGAATAGGAGTCAGCCA  
GTAGTAAAAGTCCTAGTAGTAA

>875

CGCACCTTAGTGCTGCTGGACAACCTCAACGTGCGGGAGACTCATTTCGCTTTTCTTCC  
GGAGCCTGAAGGGTGAGAGCGGGGTCCGAGGGGGTAGCGTGTGGGGGCCTGGGGTT  
GGTACAGACATCGAGGGCATTGACCA

>876

AGCCTGTCTCTCATAAAGTATGGGGAATTCCTCTATGACAATCTCATCATTTTCTCCCCT  
TCGGTAGAAGGTAAGGGTTCCGCGTCGCCCCTAGCACTGGAATTCGAGACCCGGGACT  
TGATGGATTGCTTTCTTCTGGT

>877

AACGTGGAGACCATCAGTGCCTTTATTGACGGTGGAGGCAGTGTGCTGGTAGCTGCCA  
GCTCCGACATTGGTGAGTCCGACCTGGGAGGTTCTGGTGCTTTCCACTTCTCCAGGGA  
GTTGGAGAGCATTACAAACAGAAG

>878

GATTGAGTTTGACGAGGAGAAAACGGCTGTCATTGACCATCACAACTATGACATCTCA  
GACCTTGCCAGGTAATCAGGCCTGTACCTTCCAGGTTTCAGGGGCATATGGCAAAG  
CTCTGCTTAGCCAAAAGCCAAGAG

>879

AGAACCTGCTGAAGGCCCAACCATCGTTGGGAAATCATCTCTAAATCCCATCCTCTTT



CGAGGTGTTGGGTGAGTGAGTGAGCAGGGAGAGGACAGCAGAAACCTGGGGGAAGA  
AGGGGTCACTTAATTTTTGTGGGAA

>880

TTTGGTGCTGGACATCCTGACGGGCTCTTCCACCTCTTACTCCTTCTTCCCGGACAAGC  
CTATCACCCAGGTAAGGGCTTCACAACCTTGAGGCTTCGAAATAAAAATGAAGCAGAA  
CAGCACATTTGGCTGAGGCGAAG

>881

GCTCCCTCGACTTCTTCAGCGACTCCTTCTTCAACTCAGCAGTGCAGAAGGCGGCGCC  
CGGCTCCCAGAGGTAGCTGCCAGGAGGCTTAGGGGCCGGGGATCCGGGTGGTGCAGT  
GTGTGTATATGGGGAGGACTCAGAA

>882

GGGGCCTGTGTCCCATCATCGGGTGGGCGAGACAGCCCCACCCAATGCCTACACTGTC  
ACTGACCTAGTGGTAAGAGATGTTTGGGGTGGGAGGGCCCAAAGGGTTTGCCAAGCT  
GACTGAGCTCAGCTCAGAAGCACTT

>883

GATGGCGATGACATTCAGCTGGAGTTTGTCCGCATTGATCCTTTTGTGAGGACCTTCCT  
GAAGAAGAAAGGTGAGTGTAGTTCTGCACGAGGATGCTGCCAGAAAACGGCCCCAG  
GCCTCACTTGCTCTCGAGGCCCAA

>884

GTATGGTGTATTCCAGTTTAAAGTGGATTACAACCGGCTAGGCTACACACACCTGTACT  
CTTCCACTCAGGTAAGCACAGGTGACAGCTTCTGTTTTTCAGCTAGCATGTGCCCTGCCT  
GGTTTCTGCAGTGGGCAGGTCC

>885

TGTCTTTCAACTGGCAAGAGTCATTTTGACCAGCAGGTTAATCAACTCTAAGACAGATC  
CTCACGCAAAGGTATGTACCTGGAAATATTAAGTGAAGAAATTTTTTCTCAGACTTTTC  
ATGAGCTTTTTATAGGACATTC

>886

CCACCATCCACGCCAGCCGCACCATGCCGCTCCTAAGCCTGCACAGCCGCGGCGGCAG  
CAGCAGTGAGAGGTAAGTGCCCCGCCCCCGTCCGAAGCTTCCAGAAGCGCCGGCCGC  
GCAGGCCTGCGGGGGGCCGTCCTCC

>887

CCTGAAGATCCCAGGTGGGCGAGGGAATAGTCAGAGGGATCACAATCTTTCAGCTAAC  
TTATTCTACTCCGTGAGTATGGGGCCGGGCCTGCTGGGGCTGCTCTGGGGCCACAGGT  
ACTTCTTGTGCACCTTGCTGCCCCG

>888

CAGTGCTGAGTGGCGGCAGCCTCTACATCGAGATCCCGGGCGGCGCGCTGCCCCAGG  
GGAGCAAGGACAGGTGAGGGGCAAGGACAGGCAGGGAGTGCTCACCCAGGGGAGCA  
GGGACCAGGTGAGGGGCAAGGACAGGC

>889

GAGTTCGCTGAGGAGCAGCTGCGAGCCGACCATGTCTTCATTTGCTTCCACAAGAACC  
GCGAGGACAGAGGTAGGTGACCCGTATCGCCTGCAGTAGGGTGCGTGGGGGTGCCTG  
CGCCGCCCTTCATTCTCAGCCCCG

>890

CCCTCTTGAACACGACCCTCAGCAGCAGCAGCTTTGAGATTTACCAGTGCTGCCGTGA

GGCCTTCCAGAGGTGAGGGCCTGGGCTGTGGGACCTGCAGGGCACCCACAGTGATAG  
ACAGAATGCTTGAGCGCTGGGGGGG

>891

GTGGGTGATCATTTTAGCAGTTCTAGCAGGATTGTTGCTACTGGCTGTTTTGGTATTTGT  
AATGTACAGGGTAAGTAACGGACTTAGAAAAGAAGGAGAGAGGGAAAGCAGAAGAAA  
AGGGAAAGGGAAGAAGGAAAAGAA

>892

TGATAGAAAAACAAATCAGTCATGGCAACTTCAGCACCCAGGCCCGGGCCAAGACAG  
AGAACCCGGGCAGGTGAGTGAGCGTGTGTAGATAGAATGGGGCCAGGGAGGAGGGG  
AGAAGGAGGGACAGAGCTCTGTAGAAC

>893

CTGGGGAATTGTCATTATGGCAGCATTGGCAGCAGGACATCTTGTCAAAGTCACAT  
GATTCACAACAGGTAAGACTCAAAGATATATTTAACATGTTCCCCCTATACTTCAAAAA  
ATATGCAGTGTA AAAA ACTTACTA

>894

ATCACCTTTGGTGCCTTCCTCATCGGGGCCCTGCTCACTGCTGCACTCTGGTACATCTA  
CTCGCACACGCGTGAGTACCCAGGCCCCACAGTGAGCATGCCGGGCCCCCTCCATCC  
ACCCGGGGGAGCCCAGTGAAGCC

>895

GAGCAGGAGCACCAAGTCCAAGCCCCCTTGGAGGCCTGTCTGGAGGCTGAAGAGGCCGG  
CTTGCCTCTGCAGGTAAGGACTGGAATATAGAAATTCAGTAAGAGGAGGCAGTAAAGA  
GGAGGGATGTGTAATCCCCGGATGA

>896

GGGAAGTGGCTCCGGCCTCCAGGCTCCGGGGCCGGCGCTGACCCCATCCCTGCTTCCT  
ACGCATACATTGGTGAGTGCCTGCGGAGGGGTGGGGTGTGTGGGCGCCAGACCAATG  
GGATTGGCATGTGGCGGGTGACTGA

>897

TCCTAGCATTCACTTCTGGAGCACCTGAGTCCCATTGCGCCCCGTAGCCCGGCCAAG  
CTCTCCTTCCAGGTAGGATCCTCTTTCCCCGTTTTGGACAGGGTGAGAGACCCAAGAA  
TGGCCCCCATCTGTGACCTCTCCC

>898

CCTGGGGCCCTGCGTGTGATCTCACCTCTTCGACTTCAAACAAGGCATCTTGTGCTATC  
CAGCCCCCAAGGTACTTCACAACATGAGATACCTAGGTAGGGGTGGATGTGCCACCCA  
ACACCCAACCACTGACCCATATT

>899

GGAAGGAGGCCCCGAGGGATGAGACCAAGGCTGACACTGACACAGCCCCAGCTTCAT  
TCCCTGCTCCTGGGTGAGTGTTGGTCTAAGGTGAGCCAGATGGGTGAGGGTTGTGATT  
GGGGGTGCTCTTGGAGCCCCACACC

>900

TGTGGAATCAGCTTCTCAGGGGATGGCACCCAAAGGCAGCGGCTCAAAACGTTGTGC  
AAAGACTGTGAGGTGAGTGGCCTCCAGAGGATGGGGCATCGGGAGATAGGAGCTGG  
AGCAGGTCCAGTGTCATGCTACGCTG

>901

GCCCCATGATGTGGCATCGGGGCTGTTCTGCAAGTGTGAACGGAGACGCTGCCTCCGG

ATTGTGGAAAGGGTGAGTTGGGCAAGTGGAAGAGCCCAAGGCTCACCTCGGCCCT  
GGCCCCATGGGCTTGGCCCCATGC

>902

CATCTGCCTTCGCCCTCCCCGCCCTGGTCTCAGGCGCCAGTGGAATGTGTCCAGCGA  
CGTTGCCTACGGGTGAGTTGGGCTGGAGGGAGCAGAGCTCATTCTGCTGTAAAATCG  
TCGCTGCCTCTGCTTCCTTTCAAC

>903

CAGGCGGCGCCCCGGAGCCCAGCCACTGCCTCCACCACCCCCATCACAGTCCCCAGA  
GCCACAGAGCCGGTGAGGCCCCAGTGGGTGGAGGGAAGGCACAACCCTGACCTTAC  
CCAGTACCTGCCCTGACCCCAACCCA

>904

GCCCAAATTCGGGGGCAGCAACCAGAAGCGCCAGAAGTGTCGTTGGCGCCAATGCCT  
GCAGTTTGCCATGGTGGGTGGGGCAGGAAGGGTCAGGTGGACGGGATAGGTTGGGCC  
AGGCGCCCCAGTGCCTGGAAGTGGTG

>905

ACGGGAAGGCGCAAGCAGTCCTGTGCAGGTGCCGGGCCCTGTTGCAGCTTCCACAGA  
AGCCCTGTTGCAGGTGAGGGCCCCACCCTGTCTGCCTTCCCAGCCTCACCCAGCTGC  
ATGCCAGGGAGCTGAGACCAAGTCT

>906

CCAGGACGAGTGGACACCAGGCACAGCTGTCTGACTTCTCCCGTATTGGTGCCTGGC  
TGCCCTAGCAAGGTGGGGCAGTGATGGATGTTCTGTTGGTGCCGTAGCGGAGTGGTC  
TGTAAGCAGAGTGATGATGAGCCA

>907

GGAGAACAAAGGATGATTCTGCCTCCAAATTGGCCCCAGAGGAAGAGGCAGGAGGGGC  
TGGCACACCCGTGGTCAGTGCTGGGGATGCCCCACCCTGCCCTGACCCTGCTGTAGCC  
CCAACAACCACATTGACCTATGGTG

>908

CCGCGGAGAGAACCCGGGCACCCCTGCTCTCTCCATAGGCTTCTCCGTGGCCCTGGGC  
CACCTCCTTGGGGTAGGTCATGGCCATGGGTTCAGCCTCCCTGGAGAAACAGACACA  
CAGACCACTCCAGAGACAGACACA

>909

CGGCTGCTCTATGAATCCTGCCCCGCTCCCTGGCTCCAGCTGTCGTCACTGGCAAATTTG  
ATGACCACTGGGTAATGGCTGAAACCCCTGCCCTCCCCTTCTCTAGAAACCCATTTTA  
GAGGGAGAACAAGAGCTGGAAT

>910

AAATCATTCCATTCCGAGTGGCTGCCTACAACAAAGCCAAAAAAGCCATGGACTTCTA  
TGATCCAGCAAGGTAGGTTTTTCAGAGGAAAATTCTTTTATCAACATCTGTATAAAAGAA  
ATGATGAGGCAGAATTTGGGCCC

>911

ACCTGCAAAAGTCAGGGCAAGACGTGTCCCAGGCCCAACGCCAGATCAAGCGGGGG  
GCGCCGCCCCGCAGGTAAGCGGGGGTCCCCGGGGCTGGGCGGGGTCGAGCGGGGGC  
GCACCACGGGTTCGCTCTGTCTAGGCCA

>912

AGCGTCCGTTTTCTGCAGCAGCGACGCCGCCAGGCGCGGCCGGGACCGCAGAGCCCC

GGGAGCCCGCTCGGTGAGTGCAGCGGAGAGGGCAGGAAGGGCAAGCCGTAGAGGCG  
GAGTCAGCGGGAGAGGCGGGGCCAGAG

>913

ACCATCCCACGAACACAGATAGAAAGAAGGAAAACAAGCCTGTATTTTTCCAGCAAAT  
ATAACAAAGAAGGTATCCCTTTCCCAATCAGAACAGCAAATTCTAATTCCATTTTGGGT  
TTTCAATTCTGATGCACTATGTT

>914

GTTCAAGAAACACTTTTTTCATGATCCATGGAAGCTTCTCATCGCTACTATATTTCTCAAT  
CGGACCTCAGGTTTGGGGATTATTATCATCTTTGTCTTAGTAGAGACAGTGTGGTAGGG  
AGAAAGCACTGAATTGAGGCC

>915

GATGTGTCAGAACTTCTTAAACCTCTTGGTCTCTACGATCTTCGGGCAAAAACCATTGT  
CAAGTTCTCAGGTATTTTCTATATACCCAAAGGAAAAACATAATACATTGTGCTTATTT  
AAGAGAGCCACACCTTAAACT

>916

TGAGCTTCATGGGATTGGTAAATATGGCAACGACTCTTACCGAATTTTTTGTGTCAATG  
AGTGGAAGCAGGTGAGGCTCACTCCCATCCATAATTCAGCACATTGGTCTCTGAGGC  
AAAATAAGTCCACCATTATGGTT

>917

AGTTGGGGAAGCTCCAGATGGACCAGCCAGTGCCTACTTGGCCGACACCACCCATACC  
TCCTTGACATGGTGAGGCCCAAGGATGGGTGTAGACCAGCGCAGGGGGTAGAAAC  
GATTTTTAGAAACGAAAGCTTTTTTA

>918

TGTCTCCTCCAGGCCTGGAGGCCTTGGTGTCTGAACTCTGTGCTGTCCTGAAGCCTCG  
CCTCCAGCCAGGGTGAGTGAGGTCATCACCCAGGGTGTGAGAAAAGCCTGCTTAGA  
ACATCCCTGGAGGAGCAGCAGCCAG

>919

CCCCCAGGCTGTGGGAAGACCACAGTAGTTGCTGCTGCCTGTAGTCACCTTGGGCTC  
CACTTACTGAAGGTGAGGGTCTCTGGAGAGTAGAGCCCCAGCTACTTCCCCTCCCCAG  
CTCATGTTCTCCCTCTCTGCTGCT

>920

GGCTGGGTGAGGATGCCCCGTGTGATGGCTGTGCTGCGTCACCTCCTCCTCAATGAGGA  
CCCCCTCAACAGGTACTTATACAGAGCTGGGCCTCTCAAAGCTGGGGGGGCGGGCTGG  
GCGCGGTGGCTCACACTTATAATC

>921

GCGGGCCCTCACTGCCCACCTTCCCCTGGGCCAGGAGGTGAACTTGGCACAGCTAGC  
ACGGCGGTGTGCAGTGAGTATCAAGGGAGAGTACTGGCCCTCCCTAGGAGGTCCCTGG  
CTTTTGTTACAAGAACTCAGTCCTG

>922

TGGTAGGGGATCTCTATGCCCTTCTGACCCACAGCAGCCGGGCAGCCTGCACCAGGAT  
CAAGAACTCAGGGTAAGAGGACGTGGGCACCGGAAAGGCGGAAAGAGGAAATGGAT  
GTAGATGGGTGGGTGGTGAGGAAGGG

>923

GGCTGAGGACTTTGGGCAGGCACTGGAGCAACTGCAGACAGCTCACTCCCAGGCCGT

TGGAGCCCCCAAGGTGGAGACCAAGTCCTTGGAGGTGGGACAGGAGCCCCTCCAAGA  
GCATATCCCAACCACGCACTTTCCAT

>924

GGCCCCCTGGCACCGGCAAGACCCTTCTGGCCAAGGCAGTAGCCACTGAGTGCAGCC  
TTACCTTCCTCAGGTGGCCAGGGGGCCTGGAAGGGATGGTGGGTGGATCAGGGGGCTG  
CAGCAGGCTGGGGAGCAGGAGGGGGCT

>925

TCTTTGATGAACTGGACTCTTTGGCCCCAAGCCGGGGGCGAAGTGGAGATTCTGGAGG  
AGTGATGGACAGGTAGGGGTCTGAGTGGGAATGAAAGCTGAGGGGTCCAGGGTGGGA  
AGGATATGAGAAAGCTCACAGCAGT

>926

AGGATGTGTTTGTGATTGGAGCCACCAACAGACCAGATCTCCTGGACCCTGCCCTTCT  
GCGGCCTGGCAGGTGGGCCCCCTGTACTGCTCATCTCCACCCTCATTTTGTGCCTCCTT  
CACCCCTCATGGCTGGGCTCCCT

>927

AGCTGGTGTTTGTGGGGGCAAATGAGGACCGGGCCTCCCAGCTACGCGTTCTAAGTGC  
CATCACACGCAAGTATGCTCTGTTAGAGGAAGACTGCGAAGGGCTTGGGCCTTGGGAT  
GCTTAGGGGATGCATGCAACATGC

>928

GACCTCTACTCTCTCTGCTCTGATGCTATGACAGCTGCCCTCAAACGCAGGGTTCATGA  
CCTGGAGGAAGGTGAGCCACTTGCCGGTCTGAGAGGTCAACCAAAAAGCTAGTGGGG  
AGCTGGGTGCACCTGAGTCCCAGC

>929

TGGGCCGCGACACTAAGAAACATCTAGTGGTGCCGGGGGATACAATCACTACGGACAC  
AGGATTCATGCGGTACGTGGGGACTTGGGGGAGTCGAGGCTTCAGAGAGCGGCTTCA  
GGGCTCTCTGCACGTGGTCCAGGCC

>930

TCATTGCATCTGTTGCTGGCTCTGTGGAGAGAGTAAACAAGTTGATCTGTGTGAAAGC  
TTTGAAAACCAGGTGAGAACAAAAGGTGTGTATTCCCTTTCTTGCAGCATCAGGTTGT  
ACAACCAGGCTTTTCCTGCCCCCT

>931

CTTCATCTGGATTTACCCAACACCTGAGCACAAAGAAGAGGAAGCAGGGGGCTTCATT  
GCAAACCTGGAGGTGAGCAAACACTGTGGCCATTTTCAGTGGGATGGAGGGGGCTCA  
GTCTTTGCTGTGTTTTTGTGGCCAG

>932

GGTAACTCAGAGGATGATGCTGTATGATACCAGCATCCTGTACTGCTATGAAGCATCCC  
TTCCACATCAGGTACTCTCCCCAGGGCCTCTCCCTTCTTCACTGATCTGTGAGCTGCTC  
TGTTGTTTGTTCAGAGACAATA

>933

ATCTGCCTGAAGCTGGTGGGCTGCAAATCCAAGAAGGGGCTGTCTCGTCTCCAGCT  
GTTATCTGGAAGGTAAAGCCCGGGCCGCACGGGTGGGCTGAGTAGCCGCGCGCCCTCC  
CGCTGCTGCTGGGCCCTTCCTAGG

>934

GACCCCAACCTTTTCGTTGCACTGTATGATTTTGTGGCCAGTGGAGATAACACTCTAAG

CATAACTAAAGGTAAAAGGGTTGTGGGCAGCTAGTGGTGGTTGCAGGAGATAGAAATC  
TGGAATTGCGGTTTGACCTACC

>935

GAGGTCCATCTCGCTGAGATACGAAGGGAGGGTGTACCATTACAGGATCAACACTGCT  
TCTGATGGCAAGGTAGGGGACCCTTGGCAGGGGGCGCTGATGGGCCCAGGGCAGGGG  
AACCAGAGGTCCTGCTGTTCGGATTG

>936

CCAGTACGGGGAGGTGTACGAGGGCGTGTGGAAGAAATACAGCCTGACGGTGGCCGT  
GAAGACCTTGAAGGTAGGCTGGGACTGCCGGGGGTGCCAGGGTACGTGGGGCAAGG  
CGTCTGCTGGCATTAGGCGATGCATC

>937

GTGGAAGAGTTCTTGAAAGAAGCTGCAGTCATGAAAGAGATCAAACACCCTAACCTG  
GTGCAGCTCCTTGGTGAGTAAGCCCGGGGCTCTGAAGAGAGGGTCTCGCGCCGCACC  
CCCAGGGTGACACAGGCGCTGGGGAA

>938

TGCTGCTGTACATGGCCACTCAGATCTCGTCAGCCATGGAGTACCTGGAGAAGAAAAA  
CTTCATCCACAGGTAGGGGCCTGGCCAGGCAGCCTGCGCCATGGAGTCACAGGGCGT  
GGAGCCGGGCAGCCTTTTACAAAAA

>939

TTCCCCATCAAATGGACTGCACCCGAGAGCCTGGCCTACAACAAGTTCTCCATCAAGT  
CCGACGTCTGGGGTAAGGGCTGCTGCTGCACTGAAGTGGTCCTTCCTGACTACAGGAG  
GGTTTTTTTCTGCCTCTTTCTTGC

>940

CTAGAGAAGGACTACCGCATGGAGCGCCCAGAAGGCTGCCCAGAGAAGGTCTATGAA  
CTCATGCGAGCATGTAAGCCTTCCTCAGCCTGTTCTCACGAGTATATGTGGGCATTCCA  
GGAAATTCAACTGTGCAGGAGTGT

>941

GACCGGCCCTCCTTTGCTGAAATCCACCAAGCCTTTGAAACAATGTTCCAGGAATCCA  
GTATCTCAGACGGTAAAGTACCCATCCCGGGGTACCTGCAGTGGGGTGAAAGGGCAGC  
CATGTGGGACTGCAGCCTGGGTCA

>942

AGAGCTGCAGAGCACAGAGACACCACTGACGTGCCTGAGATGCCTCACTCCAAGGGC  
CAGGGAGAGAGCGGTAAGTCCCCCGCTTCCCCCAACCCCACTGCTCTTCCCTTCCCTG  
CCAGAGGCTACATTCAAGGCCATCAT

>943

CAAAGCTAAAATTGAACTACTTGGGAGCTATGATCCACAAAAACAATTATTATTGAAG  
ATCCCTATTATGTAAGTACAGTTCACGTTTTAGGGCTAATATGAAGACCCAACACATTTG  
TATCCTGCCATATTAAATAAC

>944

ACTATAAGCTCCAGGTTGACTTCTCCTCAGACCACCTGGGCTGTTTCACCAAGTGCCG  
GAAGCCATGCAGGTTAGTGTCCCCTTCCCCGGGTACAGGTTGGGTAGAATACAGGTTA  
CCGAGCCAAGCATTTGGGAGAGCT

>945

AGTGGCCAAAGTCAACATCTTCTTCAAGGAGCTGAACTACAAAACCAATTCTGAGTCT

CCCTCTGTCACGGTAGGTCGTGCCTGGATGGAGCCTGTGATGCTCTGGGGGTCTTACTT  
AGCAGGGCGGCTGTCGGGGAAAA

>946

GCGCCATCTACAACAACATGAAGCAGTTCATCCGCTACCTCATTTCTCCAACGTGGGC  
GAGGTGGTCTGGTGAGCAGCTGGGTGGGCGTCCAGGAGGAAGCCGGGGTTAGGGTGG  
GGTGGCTGCAGGTCTGGGAGGCAG

>947

CGCCCCCCCCGGAGCCCCAAGGAGCCCCCTCATCAGTGGCTGGCTCTTCTTCCGCTACA  
TGGCAATCGGGGGTGAGCTGGAGGGGTTCTCGATCCTCCCCACCCCTTGGGACTAAC  
CCCCTCTCTGGGACACCAGCTCCC

>948

CACCGTGGGAGCAGCTGCCTGGTGGTTCCTGTACGCTGAGGATGGGCCTCATGTCAAC  
TACAGCCAGCTGGTAGGGGGAGGCCACAAAGGAGGGGACCAGGAGGGGGGGGGGAT  
GCAGGAGGGTACCAGGAGGGTGGCAT

>949

AGGCCCCCGAGCCCATGACCATGGCCCTGTCCGTGCTGGTGACCATCGAGATGTGCAA  
TGCACTGAACAGGTGGGGGGCCCCCAGCTACACCCACCACCCTCCCCTGAGGCCACT  
GCCACATCCTCCACTGTGCCGCCC

>950

CTGGCTGCTGGGCTCCATCTGCCTCTCCATGTCCCTGCACTTCCTCATCCTCTATGTTGA  
CCCCCTGCCGGTGAGGTTTCTTCCGCCCAGGGCCGCCACCCCAGCACTGGGGAGCCC  
ACGGGCGCCCATGACCACTCCC

>951

CTCAAGATCTCACTGCCAGTCATTGGGCTCGACGAAATCCTCAAGTTCGTTGCTCGGA  
ACTACCTAGAGGGTAAGGAGTGCCCTCTCTGTCCCAAGCCCTGGCCCCACCACAGCCC  
CTTCCCCATGACGTCCGTCCCCCG

>952

ATGTGAACAGGAAGAAAAGTATGAAATTCCTGAAGGTCCACGCAGAAGCAGGCTCAA  
CAGAGAACAGCTGGTATTTTTCTTTAATAACAATTTTATTGTTCTTATTATGACATACTA  
TTATTATCACCATCAGGAAGAA

>953

TGTGCACCGGCTGGTCAACCTCTTCCAGCAGGGGGGCCGGGAGCTCGACATCTACAAC  
AACCTACGGCAGGTGAGGCTCGGTCTGAGGGAGGAGGGCTGGGGCCTGGACTCCTGG  
GTCTGACAGAGGAGGGGCTGGGGGC

>954

ACCTGCCTGCGAGCCCTGCTGGACAGCGCAGCTCCGGGCACGTTGGACCTGGAGGCC  
CGCAATTATGACGGTAAGCATTTACCGCGGGGCACCGCTGGGCTGTCCAGCGGACCTG  
GAGTCCATCAGCGGCCGCAAAGCCC

>955

GGCAGTGAACACCGAGTGCCAAGAAACCGTGCAGCTCTTGCTAGAGCGCGGTGCCGA  
CATCGACGCAGTGGTGAGCGTGCACTAGGAGCTGGGAGGGAGCGGGGCCTTAGCAGG  
GGCGGGGTCTTGCGGGGGCGGGGCC

>956

GAGCGGCCGCTCCCCGCTCATCCACGCCGTGGAAAACAACAGCCTTAGCATGGTGCAG

CTGCTGCTGCAGGTGCGTACAGCCCCCTGAGCCTCGCGCCCACCCTATCCTCTGACC  
CCAACCCGGCTCTGGCCTCAGCCC

>957

CAGCGGCGCTGACAGCAGCCTCAAGAACTGCCACAACGACACGCCGCTCATGGTGGC  
GCGCAGCCGCAGGGTGAGCCGGGGCAGCTGTGGACATGCCCCCTGCACACGTGTGTC  
CGCGGGCTGGTTGCAGGCGAGTGTGC

>958

CAGCCAGACCCCTCCCCTGACCGGAGCGCCAACACCTCCCCGAGAGCAGCAGCCGC  
CTCAGCTCCAATGGTGAGAAACCGTTCCCAACCTCCAGCCCTGGCGCCTCCTCCCTCA  
GACCCAGGAATCCCAACCCACAGCC

>959

AGCTGCTGAAGAACCACTGATTGAGCCCCTGATGGAGCCAGAAGGGGAGAGTTATGA  
GGACCCACCCCAGGTGAGGGGGCAGCAGGGCTGGGCGGGACTTTGGGAATCCAGGAT  
GATTGCTGCCGTCCCTAGCTGGGGTG

>960

CTTCATGCCGTCTCCCCAGGTGGTCAGGTGGAACCCATGCCTGGAGCCTCACCGCTTC  
AATGACACAGAGGTGATTCTGCCTTTTTCTCAGTAGGCTGAGGGTACACAGAGGTG  
ATCTAAGTCAGGGACCAGAAGCTG

>961

CAGTATCTCTGCTGCTCTCAGACAGCCAAAAATGCTATGGGCTGCCAAATTTTGGAGA  
ACAGGAATGGAAGTAAGCAATCTGATCGATATAATTTCTTTCTCCTTTGACTGTTTCCAT  
CACTCTCCAAGGGTCTGTCAAG

>962

GGAAGGGTGATGAATATTTTATCTTGGAGGAAAGCAACTTACCATGGTGGAGAGCACG  
AGATAAAAATGGGTGAGTCCACACCAGCCCTTCCTGAGCCTGGTGCCTGCCCACTCCC  
TACACGCAAAAAGTGCTGCGGCAT

>963

GAGGTTTCATTGTCAGAGACTCCAGCAAAGCTGGCAAATATACAGTGTCTGTGTTTGCT  
AAATCCACAGGGTGAGTGCTACTATTCCAAGGCCCTGAGGACAAAGAACAGGGGTAC  
CCTCCTAATAGCTCCTTGATGCTG

>964

TACCTGGCTGAGAAGCACCTTTTCAGCACCATCCCTGAGCTCATTAACCTACCATCAGCA  
CAACTCTGCAGGTGAGTACCAGGGGCAACTGAGAAGGGAGTTACAGACACCAGGATA  
AGCAATGCAGGACAAGGTGATAAG

>965

ATATCCAGGCTCAAATATCCAGTGTCTCAACAAAACAAGAATGCACCTTCCACTGCAG  
GCCTGGGATACGGTAACTCCTTATTTCTCTGGGGTAGGGTGGACTGGCCAGTTGCAAA  
AACTACCTTTGCTGGCCTTGCTTA

>966

TGGCCATCAAGATGATCAAAGAAGGCTCCATGTCTGAAGATGAATTCATTGAAGAAGC  
CAAAGTCATGATGTGAGTTATAGCCCAAACCTCAACTCTCAATCTATTTGCTGGAGTCTA  
GGAATTCACACAACAACCCACTG

>967

AGAGATGTGCAAGGATGTCTGTGAAGCCATGGAATACCTGGAGTCAAAGCAGTTCCTT



CACCGAGACCTGGTGGGACCTTAGAAGGATTGGCCTAGGACAAAGGGCTGATGGGGT  
GGAAGTAGCAGTGGAAGATATATCA

>968

GTCCGGTGGTCCCCACCGGAAGTCCTGATGTATAGCAAGTTCAGCAGCAAATCTGACA  
TTTGGGCTTTTGGTAAGTGGATAAGATTACACAGATTATACAGCTCAAAGGATAAGAAA  
TGCAATGGGGAAAATTCACACTT

>969

CCTACGTCTCTACAGGCCTCATCTGGCTTCAGAGAAGGTATATACCATCATGTACAGTTG  
CTGGCATGAGGTAAGTGCTTTATTAGGATCTCTTAAATTATTTCCCTTGAATCTACTTGCC  
CATTTAGCTGGCCATTCAGC

>970

ATGAGATCTCTTGGGCAGAATCCCACAGAAGCAGAGTTACAGGACATGATTAATGAAG  
TAGATGCTGATGGTAAGTCTTCAATTTTGTGGGGCTGGGAGGGGTTGAAGAAGTGATA  
CTTAGATGTTTCCACTAAACCTTT

>971

GATGGCAAGAAAAATGAAAGACACAGACAGTGAAGAAGAAATTAGAGAAGCATTCCG  
TGTGTTTGATAAGGTACGTCAAGGACTGGATATGTTAAATTTTGAGGATGAAATGAAGA  
TACCAGGACTCATTATGAAGACTT

>972

ACAGATGAAGAAGTTGATGAAATGATCAGGGAAGCAGATATTGATGGTGATGGTCAAG  
TAAACTATGAAGGTAAATGTTTCGGTCTCACGCCTCATTCTTCACTTTGATTTTAAAGAT  
AAGAGGCTCTTTGTTAGGGAAC

>973

ATGAGGTCACTGGGTCAGAACCCAACAGAAGCTGAATTGCAGGATATGATCAATGAAG  
TGGATGCTGATGGTAAGAGCTTTAAAACCATGAATGAGGGCCATTGTTGTGTAATTCAA  
G TTCAGACATGTTACAGGATTGT

>974

GATGGCTAGAAAAATGAAAGATACAGATAGTGAAGAAGAAATCCGTGAGGCATTCCGA  
GTCTTTGACAAGGTAATCCAGCATCTACATAGCAGATGGTACTTAAGTATGGCTTCTTCC  
GCTTTCATTCTAAAAGCTATA

>975

ACAGATGAAGAAGTAGATGAAATGATCAGAGAAGCAGATATTGATGGAGACGGACAA  
GTCAACTATGAAGGTAAACTAAATTCTCTGAGCTCAGTGTTTCATAGTCTTACCTTTA  
GATCTGTAAGCAAGCCAAGCTGCTT

>976

TCAAAGAACAGGACATAAAAACAAAGTCACAATGACATTCCATAGTAAATTTGGAATC  
AGAACTCCAAATGTGAGTATAATTTCTTCTAGGTTTAAATGCTCTGTAGGTTGGCACTGT  
TACACTGCATGTATGCAAAGAA

>977

GACACGGACGCCTTCCGCAGCTGCAAGTTCCCCACCAAGAGGTCCAAGAAAGCTGGC  
CGCCATTAAACAGGTGGGGGCCTAGGTAAACAGGTCCCCTATGTCCCTCTGGGTGATT  
CAGCAAGTGAGCTGGTATCTTCCA

>978

GCCCCCGGTCTCTGGGCCTGCAGGGCGTCCCGGGTGTTCTTGGCATCACGGGGAAG

CCGGGAGTTCCGGTACGTCGCTTTTCCGGCTTTTCCAGCTTTCACAGGGTTGAGATCGT  
GTTTTTCCGGAAGGAAGTTACT

>979

CACCCTGGCGCTCGAGGACCCCCGGATACCGCGGTCCCACTGGGGAGCTGGGAGAC  
CCCGGGCCCAGAGGTGAGTGTTTGACCCCATGACACGGTCACCCTGCTGTAAAAATCC  
CTGAGACTGACTTGTTAGTAGGCGC

>980

GGTGACAGAGGAGACAAAGGCGCGGCAGGAGCAGGGCTGGACGGGCCTGAAGGAG  
ACCAGGGGCCCCAAGGTACGAGTCCACGGCCAGCAAGGCTTCACTGGGTGACATCTC  
TTCCGCCATCTTGTAGCTTTATGTGGGG

>981

AGGACCGTGTACCACGCAGAAGAGGTGCAGTGTGATGGCAGGAGCTTCCACCGCTGC  
TGCTTTCTCTGCAGTAAGTAGCTCTCCATGCTCCACCTTTGACGGAATTTGTATGTACAG  
AGCTTCAATATGTCTATTTAAGG

>982

ACGGTTATGGCCAGGGCGCTGGCACGCTTAACATGGACCGTGGCGAGAGGCTGGGCAT  
CAAACCAGAGAGGTGAGTTGGGAGACCGTTGGTTACCTTCAGAAATGAGTTGCGACA  
GTTAGTGCCGCTTGCTGAACAGGAA

>983

AGGTGCTGAGAAGTGTTCCAGATGTGGGGATTCTGTATATGCTGCCGAGAAGATAATTG  
GAGCTGGAAAGGTAAAGTGCTATTTGGAATTAATAACAGCAAATGACTTCTCTCTGCTC  
CCTTTCTCCCCTAACCTTCCA

>984

TGTGCAAAGTGTTGGGAAGAGTCTTGAATCAACAACCTCTGACTGAAAAAGAAGGTGAA  
ATCTATTGTAAAGGTAAAATTCATTTCACTTACTGCTGTCCATATGAATATCCACACTGG  
TTCTTGTTTAATGAAATGTCACT

>985

AGTATCTCAGCGCCCTGGAGCCACAGTACCCACTGACTTTGCCACCTTCCCTTCATCAG  
CCTTCCTCAGGGTGAGGGGGAGCATGGGGTGGAGGAGGTGGGACACGTGTGGAGAG  
CTCAGGCGGCCCCCTCTCCTCCAG

>986

TGCAGAGCAGATGGTTATGGTGATCAAAGCCCCCTCCTGAGACCCAGCTCCAAGCCGTG  
GACTCTTCGAGAGTGAGATCTGGGAACTCCGGGGCCCAACCTGGGCTGGGCTGGGCTG  
GGCTGGTGGTCACCTGGGCCTCAGT

>987

CCACCACCATCATCTCCCCCTCATCCCTCACCACAGATCCCAGCCAGTCTCTACTCAG  
CCTGGAGCAAGGTGGGTGATGGGTAGGTGGGTGGGGTGGGGCAGGGCCCCCTCTTCTG  
GGGGTGGGCAGGCACGACAGCCC

>988

AGGTGGACGTGGGTTTGGCTGCCGATGTAGGAACACTGGAGCGCCTGCCCAAGGTCAT  
CGGGAACCAGAGGTGGCGTGACAGGGGGTGTGGGGGTGTAAACAGAGACCCAGAGC  
ATCTCCAGCCCCGGGGTGGCAGCCT

>989

TGGTCAACGAGCTGGCCTTCACCGCCCACAAGATGATGGCTGACGAGGCCCTGGACA

GTGGGCTGGTCAGGTAGGGCCATGGGCTGGTAGCTCAGTGCTGGGGGCAGCCAGGCC  
TGGAGGGAAGGAGGCCTCTCCGGGTC

>990

GGTGCAGAGACCAAGGTCAACCTGCTGTATTCCCGCGACCATTTCGGTGGCCGAGAGC  
CTCAACTACGTGGTAAGGTGCACGCTCCGACCAATCACAGCCCTCCTCTAACCCCAGG  
CGACCAACCAGGGTGCAGGGTGCT

>991

ACCGGGTGCGCATCAATGTACCTCCACACAGAGGGCTTCTCTGGGGCCCTCTCCAGGTG  
ACGGGGCCATGGGTAAGGCAGCCCCCTTCCCCTGCCAAGCCCTCCATGTTGGGGGAG  
GGAGCGCTGCCATGGGGGAGGGTC

>992

CCCAACAAATGCCCATTTTCATTGCCTGGACGGGCGGGGAATGGAGTTCAAGCTCATT  
GAGCCTGAGGAGGTGGGCCTCTCGGATGTTCCCAGCCCTCCTTTCCAAAGTTTACAGC  
CTGGAGGTGGGAGAACCTGGGAAA

>993

GCCAGCCATGAATTACGACAAGCTGAGCCGCTCGCTCCGATACTATTATGAGAAAGGCA  
TCATGCAGAAGGTGGGGGCTGTGGGTCTAGGGACAAGGTGGTGGGGGGCAGTGGCTG  
TGAGAAGCTGACTGGGGAGAGGGT

>994

ATAGCCAACGAGAGTGCCCCTCCCAACTTGTGTGGCACCTCCCACGCCATTGTGGGAC  
TCATGGCCAATGGTAAGTGTTAACTTCTAGAGTCTCTCCCTCACCCCCACCTGTGCTTT  
GCATATAGACCAGTGAGAAGCTG

>995

AGCATGAGATCACCATGCCCAACCAGATGGTCCGCATCTACAAGGATGGCAAGGTGTT  
GTACACAATTAGGTATGTCAAGCCTCTGGAGTCTCACTTCCTGGAATTCTCTCTCCCCTT  
CTGATAATTTTAGCTAAAGATC

>996

GCCGGATGCTCACTCCACATGCTCAGATTTCCAATGGATTCTCACTCTTGCCCTCTATCT  
TTCTCTAGCTGTGAGTACCTTCTTAAGTTTCTGGGGCCCCAGAAACATGCTGGGCTCCT  
TCTTTTCTCATCCTTGCCAT

>997

TCCTGGAAGCTCTTCCAGTTTGATTTTACAGGAGTGAGCAACAAAACCTGAAATAATCA  
CAACCCAGTTGGTAAGCGTGCCAGGGCTTGGCGGAAGTCCAGGAAGGTGGTAGGGA  
TGATTGGAGATGGCCATCCATACAA

>998

GTGACCACGATGCTCTCCTGGGTTTCCTTTTGGATCAAGACAGAGTCTGCTCCAGCCC  
GGACCTCTCTAGGTAAGAGGAGAAACAGGTATACGCATAGGCACATGGCTGGGAGTTG  
GCTGGGCCAGGGCAGAGTTGCCTT

>999

GGAGTTTGCTGTGCTCAACTTCCTGATCTACAACCAGACAAAAGCCCATGCTTCTCCTA  
AACTCCGCCATGTATGAGCTGGGTATGGGAGTGGTGGCAAGGCTTTGGAGTGTAGAGA  
CATGCTAGCAAGGGTACTGGGGT

>1000

CAAGACCAGCTGCTCACACCCGAGGAGGTCGTGGACAGGATCTTCCTCCTGGTGGATG

AGAATGGAGATGGTAAGAGGGGCAGAGATGGGGAGAGTGCTGTCCACTCTGCATCATC  
GCCACTTTCTGGCCGCACGTCCTT

>1001

GATGGCATTTCCTCATGCACCTAATGCTGTGAAAACCGCATTTTATTAGCAGAGTTTTTT  
GTTAATGAAGGTAATATGAGGGTACATAATTTTGTATTCTGGGGTAGTTTTGAAGAAAA  
TTGCCCTTATCTGAACTTTT

>1002

ATCATGTCTTTTCCCTCTACTTCATGATACCCTTTTTTTTACCACCTTTGGGATTGCTCTA  
CCACAACCTGGTAAGTAGGCCTGTGGATAAGGGGACAACCTACCTGAACACATGGCAAA  
GATGGCCCTTATCATAACCCAC

>1003

TGTTCAACTTCCTCTACTCACTGCCTCAGCTCCTGCATATCATCCCCTGCCCTCGCCACC  
GCATACCCAGGTAGCCGCTTTTTGGCTTGAAATGGACATCATAGCCTTTTCACTTGGGA  
TATCTAATGCCAGCCTATACA

>1004

CAAACCTGGAGATGAGCTATTCCAAGTTCAAGACCAAGAGCCTCTCTTTCTTGGGCACC  
TTTATTTTAAAGGTAACAGGGTAACAAGGAGGTAAGGCCCTAGGCTGCCATCCTGACC  
TTGAGGAATGGGGAACCTAGTCCT

>1005

CAACTTGCTACTTAAAGTCCTTGGGCCCATACATGAGAGAAACCTCACATTGCTCCTGC  
TGCTGCTGCAGGTGAGGATGGGAATCGAGTTTATACCTCCGTGTCTCCCTTTCTGCGTG  
ATTCTTACTCCAGTCCATTCT

>1006

TCCTACTGGGGAGCCCTGCCCAGAGCCCCTGCGTACCTATGGGCTTCCTTGCCACTGTC  
CCTTCAAAGAAGTAAGTACTTAGGGAGGAGAGAGCGTTACCCCTGTGGCTAAAGAGAT  
GGGGTTTGGAGAGAAGGGTCTTT

>1007

AATTCACCACCTCGGACTCCTGCGACCGCATCACAGACGAATTCAGCTACTGCAAGC  
TCAGTACCACAGGTGAGCTGGGGGACTGGGGGTCCCTGCGTCCCGAGAATGTGAGTC  
CCCCATTTCTTCCTGCGCAAGAGG

>1008

GCAGCAGGTCTTGGGAGCCATTGAGAGGGCCAAGCAGGTCACCGCTCCCGAGCTGAA  
CTCTATCATCCGAGTATGTATGGGGACCTGGGCGGGTGGGCGGGGGACAGGTGGGCCC  
CAGGCAGCTAATGTTCCCCTCCCCC

>1009

CCCCTGCCCGACGTCAGGCTGTTCAAGTACCTCCCCCATCATTCTGCACACTCCTCCCA  
ACTGGACGCTGGTAAGGACTTTGGAAGAAAAAGTTTACCTTCAGTATTTGAGCAGGTG  
AGCACTTTGTGCGAGAGGTGATA

>1010

GTTCAACAAGTACCTGTCGCGGCCCAAGCGCTTCGAGGTGGCCACCTCGCTCATGCTC  
ACCGAGACCCAGGTGCGCGCCCTCCCCGCCCCGACGCATCCCGGCCTCCCAGGGGA  
CACTGTTACCTTTGCACTTGTGACC

>1011

GAACCTACGTATCCAGGCCGCGGAGATGTGAGCTGGCGGCCGCCCTAAACCTGCCGGAA

ACCACCATCAAGGTATGCGGGGTCCAGGCTGGGGAGGCGGGTGTGCACCTATTTAGCG  
GGAAGTAAATGCCAACTGCCAACT

>1012

GAAGTGTTACTTTTCGGAAGGAGAACCTCCTGGAGCATGAAGCCCGGAATTGCATGAAC  
CGCTCGGAACAGGTACTTGGGAGCTGGCCCAGGTACTTGTGGGCAGGGCACAACCTGGC  
CTCTCTGTCTTCGTGCCATCCGGGA

>1013

GGAGACATTCCGCCGAAGGATGGAGCTGCGGGTGCACATGGTGTCTCACACAGGGGA  
GATGCCCTACAAGGTCAGGCTTGGCCTGTCTCCAGGGCCAGGGTTGGGTGGCCCCAGG  
ATCCTTCCTGCTGAGCCCTTTACGT

>1014

GCAGTTCATGCAGAAGAAGGACTTGCAGAGCCACATGATCAAACCTTCATGGAGCCCC  
AAGCCCCATGCAGTAAGTGACAGGGAGGGCTGGGCATGCTTTGATGCTGGCATGAGCA  
AGAGTGAGCTGTGCCAGAGTGGG

>1015

TGTGTGAGGAGTGTGGGCACCGGGCCTCGAGCCGGAATGGCCTGCAGATGCACATCA  
AGGCCAAGCACAGGTGCGTGTGCCCCGTTCTCTCTTGGGGCCCAGTCTGCTGCCAGC  
CCAGGCTTGACCGGCAGGGAAGAC

>1016

CACCTGCGCACACACACGGGTGAGAAGCCCTTCCAGTGCCACCTCTGTGGCAAGACC  
TTCCGAACCCAAGGTGAGGTACGCCCTGCCCTCCCCTCGTCTCCCCATCCTGAGGTC  
AAGGCCACAGGCTGAGCTCTTGCCT

>1017

AGGCACGTGGCCAGCCGCCATCAGGAGGGCCGGCCCCACTTCTGCCAGATATGCGGCA  
AGACCTTCAAAGGTACCTGGGCGGCCCTGGGAGAGCCATTCCTGCTCATCCGAGTTG  
GAGGGTCTCTGAGGAGGAAACGCT

>1018

GCACGTCAGACGGCACAAGGGGGTGAGGAAGTTTGAGTGCACCGAGTGTGGCTACAA  
GTTTACCCGACAGGTAGGCCAGGGCCTGGCCCCCTTCCCCTACCCTAGGATCCCCCA  
AGTTCTGAGCTCACCTCCCCGCCA

>1019

GTCAGGTTTAAGATTCGGGACATGGACTCAGGCACTGTCCTCTTTGAAATCAAGAAGC  
CCCCAGTCTCAGGTGAGTGGCTGGGTGGGCCATTGATGGGGAGGCAGATAGGAGCTG  
CGGAGTGGGCTGCCCAGGGAATCCT

>1020

CCAATGCTGGGCGCTTTGTCCGCTACCAGTTCACGCCTGCCTTCCTCCGCCTGAGGCA  
GGTGGGAGCCACGTGAGTCGCTGGGCGATGGGTGGTGGTGGGGGTGAGGGAGAGGG  
TGTGAGTGGGCCCTTCTCAGCCTCTC

>1021

TTCTGCATCCCCAGCAGCAAGAACACCTGCGAGCACATTTACGACTTCCCCCTCTCTC  
CGAGGAGCTGAGTGC GCGGGCAGGGTCTTCTGGGAGTGGGGAAGTGGGGGCGTCTAG  
AGACTGAGCTGCGGGAGGGAGAGG

>1022

TGGATCGCGTTGTCCCGCCTGGCGCGCCCGCAGCGCCTGCCGGTGGCCACTCGCGCGG

TGCTCATCACCGGTGAGTGCGCGGGTCGCGGAGCGCGGGGACTCCAGGCTCGAGGGC  
GGGACTGGACACTCAACAGGACTGA

>1023

ATGGACCTGACCAAACCAGGAGACATTAGCCGCTTTCTAGAGTTCACCAAGGCCACACA  
CCACCAGCACCGGTCACTGGCAAGTGTCCACCAGGCAAGGGCGTGGCAGGGGAGTG  
GGAAGGACACGGGGACTGGAAGTTTG

>1024

GCTGACCAAGGGCCTCCTGCCCCCTGCTGCGCAGCTCAAGGGGGCCGCATCGTGACTGTG  
GGGAGCCCAGCGGTGAGTGCCCCCCCCCACTGGAGCAAAAAGGAGCCCCCTGGGGTG  
GGGGAGGGCTTAGGGAGCCCCCTTGC

>1025

ACATTCACTGTGAACTCCTTCCCTGGGGGGTCAAGGTCAGCATCATCCAGCCTGGCT  
GCTTCAAGACAGGTGGGAATCAGGGCTGGGGGTGGGGTGGGGTGGGGAATGGGGCT  
GGGAATGGTCTTATGGGGGCAGGTC

>1026

CCAAGAGTGTGGCCCGCCGGGTCTCCAAGCCCTGGAGGGGCTGAAAATGGTGGAAA  
AGGACCAAGATGGGTAAAGCAGGGTAGGGGGGGCTGCATTGATGGAGTAGCCTTGAGG  
CCCGGTCATCAATTCCCCAACGAATG

>1027

GCCTATCGTATGGCCCAGTCTCCCCGATCATAAGAAGACTCTGGAACATCTTTGTAAGA  
AACCAAGAAAAGTGAGTGTTTTTGGTGCTTAAAAAGTGTGTGTGGCAACATCCCAG  
TGGCCAAGAATGATATCCAGGA

>1028

TGCTCCCCGCCGCTTCCGTTTCTCGAGGGAAAGGCTGCTGCCTCCTGCTCTGTCCTCAT  
CCCCGGCTTAGGTAACACGTTTTCTCCTTACGACACCCACCACAGGGTCCCCGCGCC  
GCTGCCCCCTCCTCCTTGATCTG

>1029

TGCAGTTGACTTCAAGACGCTGGCTGATGTACTGGTACAGGAAGTTATAAAACAGAAT  
ATGGAGAACAAGGTAAGAAAGGTCATAGCCAAGGTAAGTGCAAAATAGTTGCATCTGT  
GGCTTTCTCCATCATAGATAGCA

>1030

GACCCAACCTCTGGATTCCACAGAGATCAATGTTCCACAGGACATTTTGGGAATTTGGG  
TGGACCCCATAGGTAAGTATAGGAAAGTATGTTTGTCTTATTTGCAATCTTTTTTTTG  
TGGTGGGGTTGGGGATGGGTGT

>1031

TACAGACAGGGGTTCCCCTGATGGGAGTCATCAATCAACCTTTTGTGTCACGAGATCC  
AAACACCCTCAGGTAAAAGGCAAATATTTTGGTATATTATGGTTGTTAGAACTTACGA  
CCTCAGCTTTGCTTGTGTTAGG

>1032

ATCCATGCTCAGCCATCTGATAAAGAGAGGCTTACTTCTGATGCATAGTATTGATCTACT  
TCTGTAATTGGTAATTGATCAATGTTTTTTAATTGCTAGCTGTGGGACCCGCTATGGTTG  
TGGTGGCTAACTTTAAGAAC

>1033

CAGGGCCTGGGGATCTGGCCGAGGAGAGGACTGAGTTCCTGCACAGCCAGAACTCGC

TGTCACCACGCAGGTGCACACTCTTGGCCTTCCCTCTCCTCCAGGCCTCTGGGAAAGC  
GGCTTCCCTTTCTGAGCCACCCCTG

>1034

GGACCTCCTCCTGGCCACCACAGCCAAGCCATCAGTACCCAGTGCTGACAGTGAGAC  
ACCCCTGACCCAGGTGAGCAGAAACCAGGCTCTGGAGCCCAACAGCACAGTGGTGAC  
AGTGGGCATCACTGAATCTGTATCCA

>1035

AACCCGGCGCCGGAGCTCAGGGCCTCCTTTCTGCCACGTACCTTGTCTCTGCGGAACT  
CCATCAGCAGGAGTGAGTCTGGACCCAGGAGAGCAGGGGAGGGGTGGGGGGTGCT  
CCTGGGCTTCCCTAGCTCAGCCTGCT

>1036

GACGAGTGGCAGGCCATCTCGGAGATTGCCTCTACTTGCAACACCATTCTGGAGTCGC  
TGTCCCGAGAGGGTAGGCCACCAGGGTGCTGCGGTAAGCCTGGGCAGTGCTCTTGCC  
CCTTTCTGACCTGCCCACCTGATC

>1037

TGGGAACCTCTCAGAGAAGGTCTCTCACTTGGAGTCCATGCTCAGGAAGCTGCAGGA  
GGACCTGCAGAAGGTGAGGGGTGGGCTCAGCTTGGGGGGAGTCACAGGGCTGCCCC  
AGGAAAGGGGCTGGCGGCTCTGACTCC

>1038

TCAGTGGTCATCATCCCCCTTTGCTATCCTCCTCTTCTTTCTCCTTCATCGCTGGTGTGCC  
AACAAAAAGAGTAAGTCTCACGAAGCAGAAGCCAGAGAGCTCAGGGCCATGTGGGG  
AAGCAGGATGGGAGCACTCAGGTG

>1039

TCAGTGGCCATCATCCTCTTTACCATCCTTCCCTTCTTTCTCCTTCATCGCTGGTGTGCC  
AAAAAAAAAAGTAAGCCTCACGAAGCAGAGGCCAGAGAACTCAGGGCCCTGTGCGG  
AAGCAGGATGGGAGCACGCAGGTA

>1040

GGCAGCAGCGACCCCTTCCAGCAGGGCCTCACGCCGCCCAAATGCCAGGTGACCAC  
ATGAACCCCTATGGTAAGCCGCCCTACCCCCACCCGCCCGCCCCAGCACAGCCCTGC  
CCCCTGCCAGGCCAGGCAGGCCTGG

>1041

GTCAACCTGACAGGGGGCCTGAGCCACGCCTCTGACGTGGTCCTTTACCATCAGCACA  
AGCAGCCCCGAAGGTGGGGGCAGAGGGGAGCCTGGGCTGGGGAAGGGAGGCCTGTGG  
GCATTGAGTCTCCAAGCTGTGGCCCT

>1042

TGTCCCAATGGGAAGCGGCTGGACAACGGCACATGCGTGCCTGTGCCCTCTCCAACGC  
CCCCCCCAGATGGTATGCTTATGCCCTCCCAGTCCCAGCCATGCCTCAGGACCATCTCC  
TTCCTGTGGCTCCTGACTTCCCC

>1043

GACAAGTGTGAACTGGACCAGTGCTGGGAGCACTGTGCAATGGGGGCACCTGTGCT  
GCCTCCCCCTCTGGTATGCCCCCTCATCCCGCCACGCCTGCTCCTTGCCCCCTGGGCCCC  
AGCCCCGCCACCCACCACCCACC

>1044

ACTGTCAACCAGGGCAACCAGCCCCAGTGCCGATGCCTACCCGGCTTCTGGGCGACC

GCTGCCAGTACCGTGAGTGAGCCATCCCTGGGCCCCAGGGCATGCGGGAGGGTGACG  
GGGGACCCCAGAGCATGGGGTGATG

>1045

TGAACAAGTGCAGCCGCTGTCTCGAAGGGGCCTGTGTGGTCAACAAGCAGAGTGGGG  
ATGTCACCTGCAAGTGAGTGGGGCCCTCCTCCACAGTTCCACCCAGCCGGGCCCCCTGC  
CCTGTCTAGCCCTGCCCTGCCCCCT

>1046

TGACCTGCGTCCGGCCACTGCAGCAATGGCGGCTCCTGTACCATGAACAGCAAAATGAT  
GCCTGAGTGCCAGTGAGTTGGGCCCCGGGCTTCACCCAGGCATAGATCATCGCTCCCTT  
CCCCAGATTTGAGCAGGAGGACCG

>1047

CTCTGCTGTTGCTGCTGCTGCTGGTTCTGGTGGCCGGAGTGGTATTCTGGTATAAGCGG  
CGAGTCCAAGGGTGAGTCACAGGGATTCTGGAACATTCTGGTCATTATTTGCCATCCT  
AGCCTTCCCCCCCCAATAATCTC

>1048

GTACGAAGGCGGAGAGCCTGATGATGTGGGAGGCCTACTGGACGCTGACTTTGCCCTG  
GACCCTGACAAGGTGGGCTGGGAGGCGGGCAGGGTCAATTGCCAAAAGGCCGTGGGT  
GGCCTAACCAAAGGTGTTGGGTAG

>1049

CACTTTTATTCTCTTGGACTCTGTTTCTCAATGTTGGACCTAAGATATTGAAGACAGGCT  
GGAGTCCAGAGTGAGAGACTTCAACTATTCTTTGTGTGTGTCTGTCGTGTGAGCAAAA  
ATGATGTAGTTAAGAGGCTCCC

>1050

TGAATGAGGCCTTGGAAGTCAAGGATGCCCAGGCTGGGAAGGAGCCAGGGGGGAGC  
AGGGCTCACTCCAGGTGAGTGACCTCAGCCCCCTTCTGGCCCTTCTCCCCCTGCCTTCCT  
AGGTTGGAAAGCCATAGGATTCCAT

>1051

GCTCTTTCGGGACATTGCCCAAGAGTTCTCTGATGACCTGCACCATATCGCCAGCCTCA  
TTGGGAAAGTAGTGAGTAGAAGGAAAAAGGGAGTGCACCCAGGGAGGTCAGGGAGA  
GAGAATGCAGTGTGCAAGATGGGGA

>1052

GACTTTGAGGGCAGCCTTGCTGAAAATCGCTTCACAGTCCTCCCCAACATAGATCCTG  
AAATTGATGAGAGTGAGTGTTGGGTGTGGATGGGCCTGTGAGCCCTGCGCAGTGATGG  
AGTACCATCCTTGGCAGGTGGTCA

>1053

GGTTGCCCCGAAGGAGCTGGAGAATCTGGACTCCCGTATTCCTTCATGCAGTGTCATCT  
ACATCCCTCTGGTGAGGGCAGGAGAGTGGGTGTAGCCTTCAGATGTCTTTTGGGGGAG  
ATATTAGGCTTATGAAAGACATA

>1054

CCCGGGACTATGGCTACTCAAGGCCGCGTTACTCCCCACAAGTCCTTGGGGGTACGAAT  
CCAGAATGGCAGGTAAGAATAGAGGCGGGTGGAGGAATAGACATGAGGGGCCCAAAG  
GCTACATCTTCTGGGGGTTTCATCTA

>1055

CAGACTTGATCCGCAGTGGA AAAACCCATCAAGCCTGTCAAGGATTTGCTAAAGAAGAA



CCAAATGGAAAAGTGCGTATATGGCCCCAGTGTCTTTACCCTCTCTGCATCTTCTCCTG  
CAACTCTTCTCCCCTTTTCAGGG

>1056

TCTTTCTATTCCCCGCCTGCCTTCCATGGTAGAGGCCAGTGACTTTGAGATTAATGGACT  
GGACTTCATGGTAAGACCCTCAACCTCTGTAAGGTGAGTGATGAGGAAAATGAGTCAG  
CAGCTGAGGAAGAGCGTTACTC

>1057

CTGCACTATCGTAGTGCCCGAACCAAGGAGCTGGATGCATTGCTGGGGGACCTGCACT  
GCGAGATCCGGGGTGAGGAAAAGCCAGAGGTTATATGCATTGTAAGATGTTTAAAAAA  
AGCAGCAGCCAGGGGAAGGAGGGG

>1058

CCCGGGACTATGGCTACTCAAGGCCGCGTTACTCCCCACAAGTCCTTGGGGGTACGAAT  
CCAGAATGGCAGGTAAGAATAGAGGCCGGGTGGAGGAATACACATGAGGGGCCCAAAG  
GCTACATCTTCTGGGGGTTTCATCTA

>1059

TGGGGACAAAGGGAGGGTCAAAGTCATCACTGGACCCAACTCATCAGGGAAGAGCAT  
ATACCTCAAACAGGTGAGGAGAAGCCCTGCAGCCTGGGCCTCTGGCGTCTCCTGCATC  
TACTCCACCCCTACTTGCCAGCCAA

>1060

CTTCACACGAATTCATAGCTGCGAATCCATCTCCCTTGGCCTCTCCACCTTCATGATCGA  
CCTCAACCAGGTCAAAGGGAACAAAGGGAGGTGGGATTGAGGAAGGGGATAATGGG  
AAAGGAACCCCTGAAAATGCTCAT

>1061

GAAAGCAGTGAACAATGCCACTGCACAGTCGCTGGTCCTTATTGATGAATTTGGAAAG  
GGAACCAACACGGTGAGGGGAGAACTGATGAGGGGAGAACTAAGGAGGGGAAAA  
TGGAGGAGGATGAAGGAGCATGACAG

>1062

TGTGGCCACCAACTTTCTGAGCCTTGTTTCAGCTACAACCTGCTGCCACAAGGGCCCCTG  
GTGCAGTATTTGGTGAGGAGACCAATCTAGCTCCTCGGGGACCCCCAGGCTGGGCATT  
TCCCAGAGGTGGGGATTGGCTCCT

>1063

GGCCAGCCATGCCTCCCACACAGCTGCCCAGGCTGGGCTTCCTGACAAGCTTGTGGCT  
CGTGGAAGGAGGTGATGAGATCCAAATGTGCAACCACCTCCACATCAGAGCTCCCTT  
TCATTCTAGTCCTACTGGGCCTG

>1064

CAGATTTGATCCGCAGTGGA AAAACCCATCAAGCCTGTCAAGGATTTGCTAAAGAAGAA  
CCAAATGGAAAAGTGCGTATATGGCCCCAGTGTCTTTACCCTCTCTGCATCTTCTCCTG  
CAACTCTTCTCCCCTTTTCAGGG

>1065

CTGCCTCCCACATTCTTCCCTGTCTTTTTGGGTTTTGTTTTTTTGTTGTTGTGGTGGTTTTT  
TAACACAAAGTCTCACTCTGTTGCCAGGCTGGAGTGCAGTGGCATGATCTTGGCTCA  
CTGCAACCTCTGCCTTCCAGG

>1066

TCCACTAGGACCAGACTGCACCCGGCACACAACACTTGGTTTGCTCAACAAAGCCAA

AGCACACATCAAGGTGAGAATTTTTACTTTTCAGATTTGCACAATTCCTCAGTTCTGGT  
TTAATTATTGGCACTGATTCCTAT

>1067

GAGATGGAACGAATACGAATGGACAGCATTGGATCAACTATTTCTTCAGATCGTTCTGA  
TTCAGAGCGAGGTAGGCAGCTTGCCTCTTCTCTAATGAAATACTAAACATCTCTGTATC  
TGGATTTAGGGAAGGTATGTTG

>1068

CATCAAGATGAAGCAGGGGGAGACCCTGGCCCTGAACGAGCGCATCATGCTCTCGCTC  
GTCAGCACTGGGGTGAGCTGGGTGGGCCGGCGTGCCGCTGAGGCTCTGCAACCCCGG  
GCGCCCCCTGCTAACTGCCCCGCCCC

>1069

CTATGCGGCCGAGATCATCCTGGGCCTGGAGCACATGCACAACCGCTTCGTGGTCTAC  
CGGGACCTGAAGGTGAGCATGCCCCTGCTGTCCCCAGGCTGGACCTCCGTGGCTGTCC  
TCTCCTTCTCTCGACATCCCGGC

>1070

AGGGGAGGTGAACGCGGCCGACGCCTTCGACATTGGCTCCTTCGATGAGGAGGACAC  
AAAAGGAATCAAGGTACTGGCCTTGCCTGGCCTCTTGTACCTAGGCTGTGATCCTGGC  
CTGGGGAAGGATCCCTCTCCCTTCT

>1071

CCAGTGGCAGCGGCGGTACTTCTACCTGTTCCCCAACCGCCTCGAGTGGCGGGGCGAG  
GGCGAGGCCCCGGTAAGGAGCCCATGCGGGGGTCCGGGAGCCGGGCTTCCGGGTGGC  
TGGCCGGCCCGCTCTTCACCTGCAC

>1072

GCAGATCAAGGAGCGCAAGTGCCTGCTCCTCAAGATCCGCGGTGGGAAACAGTTCATT  
TTGCAGTGCGATGTGAGTGGGGGCTGAGCCAGGGATGGGAGGCCGAGGGGCCAGGCC  
AGGCAGGCTGGGGAGAGCCCCAGCT

>1073

CAGCCAGGAGACAGAGGCTCTAGGGCGGTCCCAGGGCCGCTTGGAGGCCAAGAAGA  
GAGAGCTGCTGCTGGTGACAGCGGGGGAAGCTGCTTCCATCCACTGAATCTCTGGCTG  
CCCGTGTCCGTGTCCCCATGGGTGTC

>1074

CAGCAGCAGCAAGGCCACAAGGCCCGGCTGCCCACCCTGAGGGGCAGCTCAAGTTC  
CACCCAGACACAGGTGCTGGCCCTAGTGCAGGGAGGAGGGGCTGCAGGGCTGGACCC  
CTGGGTCTGAGGTTGGAGGGGCTGGG

>1075

GGAAAAGAGCCAAGAGAAGTGCTTGTCTTTGGATGCCAAGTTGCTGAAAATTAATAGC  
ACAGCTGATCTGGTGAGTGTTTCATGGATATTTGTTGGGGTGGAGTATTGGTTGATAGGG  
AAATTAATCTGGTTTAAACTGTC

>1076

GGCTGGCAACGAGCAGCGCACGCTCATCAAGGCCTATGGCATCCGCTTCGACATCATT  
GTGTTTGGGAAGGTAGCTCGCCGCCACTGGCTCCCCTCCGTCACTCCCTGCAGGGACA  
AGGGGCCTCTCCCTGCCCCCTGCAG

>1077

CCTCTACTGCATGAAGAAAAGACTCTACTATCGGGAGAAGAAATATAAATATGTGGAAG

ATTACGAGCAGGTAGGCCCTCTGGCCCCCAGCAGGCACAGGCCTCTCATCTCTTGG  
GTGTGGGAGCCCTGGGCGTGGGC

>1078

CGAGCGTGAGTCGGGCCTGGACATCAGTCCCATGTGTGACAAGCATAACGGCCTCAGTG  
GAGAAGTCCCAGGTTGGCAGGGGACTGGGCTGAACCGGTAGACACTGGGAGGAAGT  
AAAAGGAGGGGCTGAGCCAACCCAC

>1079

GATGGTGGACCTTGCCCATCTGGCTCTTGGTCTCAGAAGAGAAGCTTTGTTTATGTCTG  
GAAGACCTGGGGTGAGGGACTCCCTTCTCAGCCTATCATCCACACTTGTGTTTACTTCT  
TTCTACCTGATCACCTTTCTTT

>1080

GTCTACCATCGCCGGGGATCCCGGAGCTATGTGCCTCTTGCTCATTCCAGCTCAGCCTT  
CACCATTACTGGTAAGGGTTCAGGAAGGGCAAGGCCAGTTGTAGGGCAAAGAGAAGG  
CAGGGAGGCTTGATGGACTGCAA

>1081

TACTGCCTCAATGTGTCTCTGGCTGATACCAACAGCCTGGCAGTGGTCAGCACCCAGC  
TTATCATGCCTGGTAGGTCCTTGACACAGAGACTAAGTGAGGAGGGAAGTGGATAGAGG  
GGACAGCTGGCAAGCAGCAGACAT

>1082

CCAGTTGCAGCCTGCGATGACACAGCGAATCTATGACAAGTTTATAGCTCAGTTGCAG  
ACATCTATCCGGGTGAGTGGCGGGAAGCCTGGCAGGTGCTGTTGACTTGGGTCTGTCT  
TCCAGATTGTCAGTCCCCTGAGGG

>1083

ACCTAGAAGCTGTCTTGAATGCCTTGATAAAATTGTGGAAGAAGGCAAAGTCCGCAA  
AGAGCCAGCCTGGTGAGAGTGGGGTGGGGAGGTGAGAAGGTACAGGAAAGAGGCAG  
CAATTAAGCTTTTTTTTTTTTTTTTTT

>1084

CGTCCTGGCAGGGCGGAGGCAGGTGGAGGAGCTGCAGCTACAGGTCCAGGCCCAGCA  
GCAGGCCTGGCAGGTCAGTGTCCCAGCCTGCCTCTTCCTCTTCTCTAATGGGCCC  
TCTGAGATCCGCAAATTGGTGGCT

>1085

GGTGAAGGAGACCAGCATGCCTGTGTACTGCACGTGCGCGGGAGACTTCGCCCTCAC  
CATCCACACCCAGGTGGGCTCTCCCTCATCTGCCTCGGCTCAGCCTGGCCTCCTTGGCC  
TCCTCTCTGAGTGGACTGGGGTCT

>1086

CCTGAACCAGAAGTATGGCCCTGACTTCAAGGACCGGTACCAGATTGAGCTGCTGCTG  
CGGGAGCTGGATGTGAGCGATGGCCCAGGACCCCTGCTGGCCCCGGGGGGCGGGGGAC  
CCCTCTACACCATGCCTGCCCTCAG

>1087

CAAGTACCGCCGGGAGACTCCGCTCAAGCCCATCCCCGTGGAGGCACTCTGTGACTTT  
GAGGGGGAGCAGGTGCGTGGGGCCAGCTCCTCTGTTACATCACTACAGAGTTTTTGG  
GGTAACATGGTTGGATCCCGGGCC

>1088

AGCTGATTGCTCCGGCCGTCTGTTTTGTGATCCCCCCCACAGACCCTGAGGCCCTGGCT

CTGGCTGACAGGTACAAGGGCAAAGGCGGGAGTCTGCATGGACCAGTCCCACCCCCA  
GGGCTTCTCAGGCCCCATTCATAG

>1089

CAGAAGGCAGCTGGGAGCAAACGCACGCTGCAGCAGCGGTATGAGGTGCTGAAGACC  
GAGAATCCCGGAGGTGGGTGCCAGGGCCACTCGCCTGAGGCTCTGGGGGTACCGGGG  
AGGAGGGGCTGGACCAGGGTCTGTGC

>1090

GATCCTGCGGCCACCACTGGAGCAAGGCCGGGCTGTGCAGGACAGTGCCGAGCGGGC  
CAAGGACCTCAAGGTACCTGCGGGTCAGGAGCACAGGTGGGGCCGGGGGAGCCCTGC  
ACTGGCCCCCTGGGGCCCCTATTTGA

>1091

GGACCCGGGTGGAGGACACCAACCGGAAATACGAGCACCTCCTGCAGCTGCTGGACT  
TGGCCCAGGAGAAGTGGGTGGCAGACAGGCAGCATGGAGGTTGGGGTGGGGTCAGG  
GGGCCAGGTGGGCATCCCCCGACGCCT

>1092

CCATCTGAATCAGGATGACACAGTGCCTGAGAGCAGCCGTGTCCTGGACAGCAAGGG  
GCAGGAGCTGGCGGTGAGTCTAGGGCCCAAGTCCTGGGAGTCCTTCTCTGAGCAGGT  
GAGAGCATCTGGCACATCCACCCGCC

>1093

AGCGCCAGGAGGCCGAGGTGCACAAGCTGGGCCAGCGTTTCAACAACCTGCGCCAGC  
AGGTGGAACGCAGGTGAGGGTGCAGGTGGGTGGTGGCCATTTTTGTTTTCTGAGAATGC  
GATCTAATTCCCTCTAAGCAATGCT

>1094

CATCCCCAGTTACGAGCCCCAGGAGACAGACAGCCTCAGCCAGATGGAGACCAAGCT  
GAAGAACCAGAAGGTGAGATGGCCGTTTCCGCAGCCCCAGGCACACACTGGCAAGGG  
AGGGTCAGAGGTCAACAAGCCCCTTT

>1095

GATAGCAAGTAGGGAGCAGGAAGTACAGAAGATCTGTGCCAATTCCCAGCAGTACCA  
GCAAGCTGTAAAGGTGAGCCGGGAACTTCCGCCCAAAGCACAAACAGCAGGGGTCT  
TATTCCACCGTGCCCTGGTCAGAGAA

>1096

GAATGGAAGGAGCAGCCACGTGAGCAAGAGAGCCAGGCTCCAATCTCCTGCCACCAA  
AGTGAAGGAAGAGGTGAGTTCCATGGGCCAGGCGGCCTCGGGACTGAGGTGGAGGC  
CAAGCTGCCCTGCTCCCCAGGGAGCAT

>1097

CACTGAAGTTTATGCCATCAACAGACAGAGGCTGCAGAATCTGGAGTTTGCTCTGAAT  
CTCCTCAGACAGGTAACTGATCTTAGTAAGAAATTCTACTTCAGGCTGTTCTAACAGGT  
GACAAATACAGACTCTGTCTTAG

>1098

ACCGGCACCTGGCCCAACAACCAGTTTGACACAGAGATGCTGCAAGCCATGATCTTGG  
CGTCCGCCAGTGGTAAGTGGTGTGAGTGTGTATGGAAGAGTGGGAGACCTGGGGTT  
CTGGGGTGCATCTCACAGCCACCA

>1099

CCACGTCCGTGAGCAGATTCTCATGAAGAGGTTTCGAGATCTCTTGCAACCTGTCTCTG

GACGCCATGGAGGTGAGCCGCCAGCGCGGGGCCGGATGGATGTTGCTTCCAATGCAG  
GTGGAATGCGTCGGGCTCCTGCGTT  
>1100  
CTGGCACTAATTGATCAGGATGCTGGGCAGGAGGATGGAGTCGCGATACTGCTGAG  
GCGTCAGGAAAGGTGAGCAGAGGTTCTCCCGCATCTGCCCACCACTCACCAGGTCCTG  
GGTGACCACGCATTCATGCCCCTG  
>1101  
CTCATGGCCCTCCGGCTCAACGAGAGCAAACCTGGTGCAGGAGGCCCTGGAGGCGGTG  
CCCAGGGGCGAGAGTGAGTTGGGGCTTCGGTGTGCGGCGCCGGGGTTCATCCTCTCTTC  
CCCTGGTTTGAGTTGGTGGCAGAAT  
>1102  
GCCACCTGGAATTCTACCTCCTCTGGAATCACAACCTGCTCATGTTGCACGGACAGAA  
GCTGAAGTCCAGGTAGAGGGTCTCCCCCGCAGTTCATCGGTGGCTCAGGTCACTGGAC  
CAGCTTGTCTGCTGGATAAAAGG  
>1103  
GGACGCTGCTGCCTGTCATTCAGTTCCTCCAGAAGAGCATCCAGCGGCACCTGGACGA  
CCTGTGCAAACTGTACGTGTGGGTGCAGGGCCTGGGGGTGGGTGGGGTGCACGGTCC  
CCTGCTGGTCCACACTGTGGAGTGC  
>1104  
GTGGCTTCTTCTCCCCCAAACAGCCCGACCTGTTCAAGGACATTGTCAATATGCTCATG  
CACCATGACCGGTGAGCTGGTTGGCCGGGAATCACTCAGGTGGGGCCGCAGGGCAG  
ATCGAGGCTCAGGTGTGTGGTGGG  
>1105  
AGGAGGCAGTGGAGGAAGTGGGGGTATGGTGGGAGGAGCCGATACTGAGCTTCTTC  
CTATTTGCCATGGGTAAGTAGCTTTTGTAGTTTTACAATTATTATTATCTTGGGGAGACATA  
GCTGCAGGAGTAAAAGCTTTTT  
>1106  
CCAGGCCCTACAGGAGCTCATCTCAGAGCTAGATCGAAGGTGCCACAGCTCAGCACTG  
GAACTGCTGCAGGTGAGACAGGGAGGGGTTCCCTTCTACAATTCAGGGAATAACTGA  
AAAAGACCAGAGCTATCTGGAACCTG  
>1107  
ATTACCTCTCCAGAACTCAGGAGTGTGTGCCATGTGCCAGGGCTGAAGAAGATGCTGA  
GGACATGTGCAGGTGAGGCAAGTTCTAGTTTTGCGGGGGATAATGGGGTGCAGAGTAG  
ATCCCAGGGTCAGGGAGCCTGGAT  
>1108  
CTACGCCATCGCCATGGAGGAGATCAGCCGTGGCTGCGCCTCCACCGGAGTCATCATG  
AGTGTCAACAACGTGAGCCCCCTCCCAGGCCCTGGGACACACGGGTGGAGGGAGGC  
TCCCGTGAGCGGGCAGGCTCTGGCC  
>1109  
CAGAAGCAGGCGTGGGTACGCCTTTCACCAGTGGTGACAAAATTGGCTGCTTTGCCC  
TCAGCGAACCAGGTACCTGCCCTGTCCCCTCACCTGTCCTTAGGGTGACAGGCCCAGA  
GGGGAGGAGAGGAAGGTGCTAGGC  
>1110  
GATCACCAATGCCTGGGAGGCTTCGGCTGCCGTGGTCTTTGCCAGCACGGACAGAGCC

CTGCAAAACAAGGTGGGCCCACCCAGAGAGGGGTTCAGCCGGATCCTGGGCTGCTGT  
CATTTCTGTTTCTAGGGCCTTCTCT

>1111

CTTTGAGGACTGTCGCATCCCCAAGGACAGCATCCTGGGGGAGCCAGGGATGGGCTTC  
AAGATAGCCATGGTGAGCCCGGCAGTGGGGGTGGCACCTTGAGGCCAGGCCCGCGCC  
CCGGCTGGCGGGGCCACTGACCAGGG

>1112

TTGTGCTGTGAACTACGCTGAGAATCGCATGGCCTTCGGGGCGCCCCTACCAAGCTC  
CAGGTCATCCAGGTAATGGTGGCAGCTTTAGGAGCTGGGCCTAGAGGCTGGACAGCGG  
GCGGAGAGTGTGGCCTCCTGACTG

>1113

CCTGGAGAGTGCCCGGCTGCTGACCTGGCGCGCTGCCATGCTGAAGGATAACAAGAA  
GCCTTTCATCAAGGTGCCCACAGGGGTCCCCGAGCCATGGCCCAGAATGTGGTGGGCC  
CAGGGACGGGGAGAGGTTGGGGCGG

>1114

CACAGTGAACCACAAACAGTTCTCCCTGAACTGGACTTACCAGGAGTGCAACAACCTG  
CTCTGAGGAGATGGTGAGTCCTGGGCTGAAGGCAGGGGCAGGGGAGGAGGTAGGAG  
CCCCATGGCATGAAGCCCCTGGTCCCA

>1115

TGCTACATCATGAACCCCCCTGACCGCCACCGTGGCCATGGCAAGATCCATCTGCAGGT  
CCTCATGGAAGGTGAAGGCTGGGGTGCCAGCTGCGGGGCCCTGACCTTTCCACCCA  
CCTACTCTCTGCGGCATTTGCTCA

>1116

GTATCTCAGAAAAGAAGACATGGAATATGCCCTGCGTAAACTGGATGACACCAAATTC  
CGCTCTCATGAGGTGGGTCCTTGCCTTCTGTTGAGGAGCTTGTACTIONAAATCACTCCAC  
TTGAACCTGACCTAGCAGAGGTA

>1117

GCACCAGGACATGCACAGCTACATCGCGGCCTTCGGGGCCGTCACGGGCCTCTGCACG  
CTCTTACCCCTGGTCAGCCGCGGGAGGGCAGGCCCCGGGGGCCCTCAGCCTGGAACG  
TGGGAAGAGAGCCAGAGGGAAGGGG

>1118

AGTTCATGGATGGTGCCCGCCGAGAGATCGTCTGCCGTGCAGATGGCACCATGAGGCT  
TGGGGAGCCACGTAGGTGTCTTGGGGACCCAGAGGTGAAGGTACAGGGAGGAAGG  
CTGAAGTGTGCGTTTACCCCAAAGGG

>1119

CTCCTACTTCCACCTGCTCACCTGGTCACTCCCCTTTGTCCTCACTGTGGCAATCCTTG  
CTGTGGCGCAGGTATAGTGACTGGTAGGAACGGGAGACCTGGATGGGGTGAGTTTGA  
GGGAGGGGGCCAGTAACCCACCTT

>1120

TACCGTGCGGGCTTCGTGCTGGCCCCAATCGGCCTGGTGCTCATCGTGGGAGGCTACT  
TCCTCATCCGAGGTGAGTGAAGACCAGGCCAGGACCAGTTGGGCAACAAAATGTACT  
GGGCACTTGCTGCCAGTACTGGGAG

>1121

AAGAGCAACCACCCCGGGCTGCTGAGTGAGAAGGCTGCCAGCAAGATCAACGAGAC

CATGCTGCGCCTGGGTGAGTGGCCCCGGGGGACTTCGGTCTGAGGTCCTGGCCAGCCC  
AACACTGCACCCTCCTGGGGCTATGC

>1122

CCTTCAGCTGCCACTTCTACGACTTCTTCAACCAGGCTGAGTGGGAGCGCAGCTTCCG  
GGACTATGTGCTGTGAGTGAGGGGCATGGAGGCGGCAGTGCTGGGAGCTGGAGCCAA  
GGCCATAAAGACACCCACCTCCACC

>1123

CTGGCATCGCCATGAGCACCTGGGTCTGGACCAAGGCCACGCTGCTCATCTGGAGGCG  
TACCTGGTGCAGGTGGGCATGGCAGCCAGCCCCTCCTGCCCTGCCCCGCTCACCTCA  
GCCTTGGGACCCCATCTTTAGGTT

>1124

GAGCTCCTGCAGAACCCAGGCCAGGAGCTGTCCTTCAGCATGCACACTGTGTCCACG  
ACGGGCCCCGTGGGTGAGCCTCACCCCTCCTCTACCGGAGCCGCCTGGCCCCGCGCTGC  
CCATGTGCTAGTCTCTCCCAGCCT

>1125

ACCAAGATGGTGGCTCGGAGAGGAGCCATACTGCCCCAGGATATTTCTGTCACCCCTG  
TGGCAACTCCAGGTATGAGAGTTCAAGCTTCTGGAGGAAGGTGGGGGGAGCACAGAG  
GCTGGGGGCTTCTGGGACTGGAGTA

>1126

CCACCGTACCCCTACTGCATGCAGCCATCCGGGAGGTGGATATCAAGGGCGTGTTTCGA  
TACTGCAACACGTGAGTATGCTGTGGGTGAAGCCGGGATGCCAGCCTCCAGCAAGAC  
CATGGCAGGCCCCACTCAGCCTC

>1127

CCTTTTGGCAGTGGTTTGATGGTGTCTGGACCTCACCAAACGCTGTCTCCGGAGCTA  
CTGGTCTGACCGGTGAGTCCCCACCCTGGGTAGTTTGAGCAGCCATACACCAGTCACC  
TCCATACTCACTGCCCATGCCCA

>1128

TTTCTCCTCCGCTTCAGCGACTCAGAGATTGGGGGCATCACCATTGCCCATGTCATCCG  
GGGCCAGGATGGTGAGGCCACCCCAGCCAGTCCTCTGTCTCTGTGCCTGTGCCCTCTG  
GGTTTCTTCTGGGAATGAAATG

>1129

GATCTTGCTCAGCTCAAAAATCTCTATCCCAAGAAGCCCAAGGATGAGGCTTCCGGA  
GCCACTACAAGCGTGAGCTGGAAGTGGCAGCTCTGATTCTTCTGTACCCACTTCC  
TGCCATGCTCCCCGCTGCCATCCT

>1130

TGGTGCCTTCTTATGACCTTGGAATGGCCCCTGATTCTCCATGAGCATGCAGCTTGGC  
CCAGATATGGTGTAAGGAGCTGGAAAGACAGGAATGGGAGTGGTCTGTGCAGATGGG  
CTAATCTTAGCATGGGCAGCTGGG

>1131

CTCACTCCATCCCCCGTATCAAGGCCTCTCCCCAGAAGAATCAGTCAACGTGTTGTCA  
GCCTTCCAGGAGTAAGTGAAAAACCTCATGGGGATACCATCCCACTCTAAGGGGGTGG  
GCATTTGAATTGTTAGAAGAGGC

>1132

GCTCAGATGTGACCATGGTGGAAGACAGCTGCCTGAGCCAGCCAGTGACAGCGTTTC

CTCAGGGCACTTGGTGAGTGGCAGCTTGGGAGTGGAGGCTGGGTGGCATCTAGGGGA  
GTGGGCGCCATGCCTACTCCACTGCT

>1133

TTACTGGTGTTCATCCCCGGAGCACCCAAAACGCTGGGGCCAAGTCAGCGAGGCCTAC  
GTGAGCCTCCTAGGTATGCCTTTGTCTGTCTCCGTCAGGAAAGGTGTGGGAGTGGATC  
TGGGACGGGGCCATGACCTGTCAGA

>1134

CGCCATCACCCGCAAGAGAGAAGCTGACCAGGCCGGCCGCGTCCCCTGCTGTGGGCG  
AGAAGCTGAAAAAGTGAGCGGGGCGGGTCTGGAGGAAGAGGGCTGCCAATCTCGGG  
TGGGGAGGGTGAACATCACTGTTTTCT

>1135

CGAGAGAAGGAGAGAGAAGAGTGGGAACGCCAGTACAGCCGGCAGAGCCGCTCACC  
CTCCCCCGATACAGTGAGTGTCCCCACCAGGCTGCAGGGCTCTGGGGCTTTAAAGAA  
AAGTGTCAAGCAGGGTTACCAAAAAA

>1136

TTTTTGTGTTGTTTGGAGCAGAAATACTAAAGAAGATTCCGGGGCCGAGTATCCACAGA  
AGTAGACGCAAGGTAAGGATGCTTGCTCCTGCACTGGATGGGCTGGTCAGGTGTCCAC  
AGTTGCACACGTGGATGCCAACAT

>1137

AAGCTGGGATCAGCAAGGACCGAATTCTTATAAAGCTGTCATCAACCTGGGAAGGAAT  
TCAGGCTGGAAAGTAAGTGTCCCCACAAGGAAGGAGCTCTCAGAGATTTTTCCTCTG  
TTGGAGCAGGGTCTACATGGCATC

>1138

TTGGGCGCATCCTTGATTGGCATGTGGCAAACACCGACAAGAAATCCTATGAGCCCCT  
GGAAGACCCTGGGTGAGGGTCCCTCTGTGGTAATGGGGTAAGGGGAGCAGCCTCAGC  
AGCACCTGAGGCAGGAAGAGCCCGA

>1139

TCACCCAAGCTCCTGGGAGAGCTGCTGCAGGACAACGCCAAGCTGGTGCCTGTGCTC  
TCAGCCAAGGCGGGTGAGGCCCCACTGCCAGCTGTGGCTCCTGCTCGGGCAAGGCC  
AGCACTGCCCTGCCACGCTGCCCTGT

>1140

TGTGGAGAAGCTCTCTGACGGGATCCGCAAGTTTGCCGCTGATGCAGTGAAGCTGGA  
GCGGATGCTGACAGTGAGTGTGTGTGTGGGTACCTACATATGCCAACCCCTATGAGAG  
CCCGGGCCTGGGCGTCGGGGTTCA

>1141

GAAGAAGAAAGCAAAAAAGGCCTCAACCAAAGATTCTGAGTCACCGTCCCAGAAGA  
AAAAGAAGAAAAAGGTAGAGAGTTCTGGGGTGTCTCAGGCCAGAAAACAGACCCA  
AACCCAAGCCCCCTCCTACACACCCAGA

>1142

GTACATGCGACAGTTCGTGGCTCACCTGCAGGAGACCAGCCCGCTGAGGGATGCCGTC  
GTCATCGAGCAGGTCTGGGCACTGCCCTGCAGGGTTGGGCACGGACTCCCAGCAGTG  
GGTCCTCCCCTGGGCAATCACTGGG

>1143

AGGCCAGCAGTGGCCTCTTCGACGTCTTCCTACGCTTCATGTGCCACCACGCCGTGCG



CATCAGGGGCAAGTGAGTCAGGTGGCCAGGTGCCATTGCCCTGCGGGTGGCTGGGCG  
GGCTGGCAGGGCTTCTGCTCACCTC

>1144

CCACGCTGCTCTGCAGCCTGTGCTACGGCGACATGGAGAACAAGCTGTTTGCGGGGAT  
TCGGCGGGACGGGTGAGGCCTCCTCTTCCCCAGGGGGGCTTGGGTGGGGGTTGATTG  
CTTTTGATGCATTCAGTGTTAATA

>1145

TGCTCCTGCGTTTGGTGGATGATTTCTTGTGGTGACACCTCACCTACCCACGCGAAA  
ACCTTCCTCAGGTGAGGCCCCGTGCCGTGTGTCTGTGGGGACCTCCACAGCCTGTGGGC  
TTTGCAGTTGAGCCCCCGTGTCTC

>1146

ACGGCCTATTCCCCTGGTGCGGCCTGCTGCTGGATACCCGGACCCTGGAGGTGCAGAG  
CGACTACTCCAGGTGAGCGCACCTGGCCGGAAGTGGAGCCTGTGCCCGGCTGGGGCA  
GGTGCTGCTGCAGGGCCGTTGCGTC

>1147

GAGGAACATGCGTCGAAACTCTTTGGGGTCTTGCGGCTGAAGTGTACAGCCTGTTT  
CTGGATTTGCAGGTGAGCAGGCTGATGGTCAGCACAGAGTTCAGAGTTCAGGAGGTG  
TGTGCGCAAGTATGTGTGTGTGTGT

>1148

ACATTTTTCCTGCGCGTCATCTCTGACACGGCCTCCCTCTGCTACTCCATCCTGAAAGC  
CAAGAACGCAGGTATGTGCAGGTGCCTGGCCTCAGTGGCAGCAGTGCCTGCCTGCTG  
GTGTTAGTGTGTCAGGAGACTGAG

>1149

GAAGCCATCCACTTCTGATGATTCTGACTCTAATTTTGAGAAAATTGTTTCGAAAGCAG  
TCACAAGCAAGGTGAGTGTGATCCTAGTCAGTCCTTTTGCTGTAGATGTTCTGAAACA  
CGTAACTAAGCCATTGTTCTTA

>1150

GTGGCCCTCACTTCCAGACCTGCACCGGGTCTTAGGCCAGTACCTTAGGGACACTGCA  
GCCCTGAGCCCGGTGAGTGTGCTTCCCTCCCCTGTGCCCAACCAACCCTGCCTGGT  
ACTGGATCCTTGCCCCAACAATAC

>1151

GCTGGACCTGGACTTTGACCCCCCTCCCGCCCGTGACGAGCCCTGTGAAGGCACCCAC  
GCCCTCTGGTCAGGTTGGTTGTGCCCAACCACTGCCCATGGGCCACCAAGCTTCCAGGT  
GCCCAACCCTGGGCTCATGTTGCCT

>1152

GCCCAGCGCTGCCGAGGGCACCTTTGCTGTGTCCTGGCCCAGCCAGACGGCCGAGCC  
GGGGCCTGCCCAAGTAAGTGCCACCTCCAGCCCCTGTCTGGCTTGTCCCCAGTCTCT  
AGGGGTGCAGCATGGAAGGAGAGCC

>1153

GGCGGGTGGGACCCAACCTGCGGCTGGAGCCCAGGAGCCAGGGGAGACGGCGGCAA  
GTGAAGCAGCCTCCGTAAGACAGCAGGGACAAAGCCCTGCCTTTTCCCTCCCTGCCGCC  
CGCCTGCCTGTCCGGGGCTCCCCTGT

>1154

TGTGAATGGCACCGTGAGGGCGGCTGTGGGGCCGGGCGCTTGGACCTGCCCCCAGG

TTTCATGTTCAAGGTGAGCCACAGCCTCTGACTGCTGCAGTCCCTCGGTGCCCTGGT  
GGGCAGATGACAACCCTGAGCCTCA

>1155

GGCGGACTCTGTGAGGAAACAAGAAGAGAGGCCCAAGATGGAGACGGCGGCGGCTG  
TAGCGGCGTGACAGGTGAGGGCGGGCCCGGGAGGGCTCGGTTTCTGGAGCGGCTGCC  
GGGCACGGGCAGGGAGCCCGGACCGAA

>1156

CAATGGGGCCGAGCCATCCCGGGCAGTGGGCACCGTCAAAGTATACCTGCCCAACAA  
GCAACGCACGGTGGTGAGTCATGGAAGCGAAATGGCAGGGGCTGTGGATGGACCCAG  
TTGTA ACTCTGGGATCAAAAGGGTGA

>1157

CTCTAGACAAGGCCCTGAAGGTGCGGGGTCTAAATCAGGACTGCTGTGTGGTCTACCG  
ACTCATCAAGGGGTGAGTGTGGCAGCCCCACGCCACCCACTGGGTGTCCCACCTCCC  
ATCCCCTCCTCAGTCATTTGATTC

>1158

TGCTCCCCTGGATGGCGAGGAGCTCATTGTTCGAGGTCTTGAAGATGTCCCGCTGACC  
ATGCACAATTTTGTGAGTGCAGGGTGGACGGTGGGGGTGGACCATGGTTGGGGGTGTC  
CTTGACCAGGTCTCAAAC TTCCCT

>1159

ACAAGTTCCACCAGCATTGTTCTCCAAGGTCCCCACAGTCTGTGTTGACATGAGTAC  
CAACCGCCAACAGTGAGCCAGCCTGGGGTGGGTGGGGGGATATGGGGAGCACAGAG  
GCCCAGCCACGAGGCCCTTACAGAC

>1160

GAGGCTCCAGACAGCATGAGGCTCCCTCGAACCGCCCCCTGAATGAGTTGCTAACCCC  
CCAGGGTCCCAGGTAGGGATGCCTTAGCTGAAGAGCTGCTGGGGGAGAAAAAGATCT  
TGGGGCTCTTGTAGACCACGAGCCA

>1161

CCGCTCCACGTCCACTCCCAACGTCCATATGGTCAGCACCACGGCCCCCATGGACTCC  
AACCTCATCCAGGTGTTGGTGCTGTGGGGGACAATGCCGGGGACCACAGGGCAGAGGGT  
AGAGCCATCCCTGTTGGCCTCCATG

>1162

GTCCCCACATTCCAAGTCACCAGCAGAGCAGCGCGAGCGGAAGTCCTTGGCCGATGA  
CAAGAAGAAAGTGATGCTCGAGGGGGATCCTTTTGGGGCCACCAAGGCTGAGTGA  
CGTGGGATGAGGGATGTGGGCAGGCC

>1163

AGGTGCTCAAGGTGTCCCAGCCCACAGCTGAGCAGGCCCAGGCTTTCAAGAATGAGA  
TGCAGGTGCTCAGGTGAGGTGGCATGTGTGCGTGGATGGGGGTGGCAGGCCCGGCCT  
TGGCATCTCTCTGGGAAAAGGCCATG

>1164

ATGTGGCCGACACACGCTTCGACATGGTCCAGCTCATCGACGTGGCCCCGGCAGACTGC  
CCAGGGCATGGAGTGAGCCTCCCAGCCTGGGGAGGGGTGGGGGAAGGGTGGGGGAA  
ATGAGGTAACCCCCAGCCAATCCGCC

>1165

GGCCACAGTGAAGACTCGATGGAGCGGGGCCAGCCCTTGGAGCAGCCCTCAGGATC

TGTGCTGTGGATGGTGAGTTGGGCCAGGCTGAATGGGGGGCACATGGGGACGTGGGC  
TCCGGGATTGGGGAGTGTGGGGCCAA

>1166

CTACGGGGTTGTGCTCTACGAGCTTATGACTGGCTCACTGCCTTACAGCCACATTGGCT  
GCCGTGACCAGGTGAGCCCCACACCTTACCCACAGTTCCTTGGCCTGAGGGATCCCCT  
CAGGCATCCATACCCACATCCC

>1167

CAAGGCCATGCGGCGCCTGCTGTCTGACTGCCTCAAGTTCCAGCGGGAGGAGCGGCC  
CCTCTTCCCCCAGGTGGGCTGGGTAGGGGGCTGGACACCTTGGGTGGGTGACTCTGGG  
TTAGAGGAAGACTGAGATGGAGGCA

>1168

TGAGCACCTGGTTACCACTGCCACCTTCTCCATCGGCTCCACTGGCCTCGTGGTGTATG  
ACTACCAGCAGGTGGGTATGCCAGACCTCCTGACCTGGACCAATGACAAGGCTCTGCT  
AGAGCCACCCAGCTGGGCCACTT

>1169

CATCATGAAGATAGCTCCAGAGAGCATCCCCAGTCTTGAGGCTCTCACTAGAAAAGTC  
CACAACCTCCAGGTGTGTGTGTGTGGGTGAAAAGAGTGGGCTGTCTCCCTCCCAGGG  
CTGCTGGGAGGAGTGTCCGAATGGT

>1170

TACGTGTGCCGGGTCCAGGAGGGCAACGAGTCATACCAGCAGTCCTGCGGCACCTACC  
TCCGCGTGCGCGGTGAGTGGCCCAGCCCTGGCCCCTACTCCCCTGTCCCGCTGGGCA  
CTCGGTTTATCTTTGAAGTGGGGA

>1171

AATCATCACAGCCGAGGGGATCATCCTCCTGTTCTGCGCGGTGGTGCCTGGGACGCTG  
CTGCTGTTTACGGGTGAGCCCCCTCGGACCTCTGAGTCAGCCGGGCGAGGGCTGGGCG  
AGGGACCCCCAATACCCAGGTAGCC

>1172

AGGAACCCTGCGGAGGGACTTCAATCACATCAATGTAGAACTCAGCCTTCTTGAAAG  
AAAAAAAAGAGGGTGAGGGTTTTTCTTCTGATAATTCAGTTGCTCGTTGGAAGGTGGT  
TTATAACAGCATCACATTTGGTTG

>1173

CAGAAAGGAACTGGCTACCGTTCGGACTATTTGTAGTCATGTACAGAACATGATCAAG  
GGTGTTACACTGGTAAGCAGATGTATCAGACTTCCTTGTTTTTGAAAGGGAGGTTTCTC  
AAACCTGTGCTTTATACAGCGTA

>1174

AATGGGTCTCTTGTTGAAATCCGAAATTTCTTGGGTGAAAAATACATCCGCAGGGTTCG  
GATGAGACCAGGTATGTGCATACCTCAGACAGAATTAAGAAATTTTCTTCATATTTT  
TTTCTCCTTTTCCACTCCCA

>1175

TCAGTATCTCAAGCCCAGAAAGATGAATTAATCCTTGAAGGAAATGACATTGAGCTTGT  
TTCAAATTCAGGTTTGTATGTTTACTATGTCTAACTATGCCTACAAGATTTTGTCTAAATC  
TTGTTTAAAATACAGTATTT

>1176

AAATTTTTGGATGGTATCTATGTCTCTGAAAAAGGAACTGTTTCAGCAGGCTGATGAATA

AGATCTAAGAGGTAAGTTCTTACAGTGTCTTAAGTTTTATTACTGCTCTAGTTGAATGAA  
GCTCTTAATTTACTAAAAGAC

>1177

TCAGGGGACAGGGAGAGCAAGAGGTCAAGAGCTGTGGGACACCACAGAGCAGCACT  
GAAGGAGAAGACCTGTAAGTTGGCCTTTGTTAGAACCTCCAGGGTGTGGTTCTCAGCT  
GTGGCCACTTACACCCTCCCTCTCTC

>1178

TTAGAGAACAGGCCAACCTGGAGGACAGGAGTCCCAGGAGAACCCAGAGGATCACTG  
GAGGAGAACAAAGTGTAAGTAGGCCTTTGTTAGATTCTCCATGGTTCATATCTCATCTGA  
GTCTGTTCTCACGCTCCCTCTCTC

>1179

AGCTTCTGCGTCTGACTCGCAGCTTGAGACTGGCGGAGGGAAGCCCGCCAGGCTCTA  
TAAGGAGACAAGGTGAGATGCTGAGGGAGGACTCAGGAGGACCCCCACCCACATAG  
ACGACCACAAAAAATCCAACACCAC

>1180

GAGCTGCTCTGTCTGACCAGCAGCTTGGGATTGGCGGAGGGAAGCGGGCCAGGCCCT  
GTGAGGAGTCAAGGTGAGACGCTGAGGGAGGACTCAGGAGGCCCCCCACCCAGATAG  
ATGACCCCAAATAATCCCGCACCCT

>1181

GAGCTGCTCTGTCTGACCAGCAGCTTGGGATTGGCGGAGGGAAGCGGGCCAGGCCCT  
GTGAGGAGTCAAGGTGAGACGCTGAGGGAGGACTCAGGAGGCCCCCCACCCAGATAG  
ACGACCCCAAATAATCCCGCACCCT

>1182

AAGCGAGCTGCTCTGACCAGCCGCTTGGGATTGGCGGAGGGAAGCGGGCCAGGCCCT  
GTGAGGAGTCAAGGTGAGATGCTGAGGGAGGACTCAGGAGGCCCCCCACCCAGATAG  
ACGACCCCAAATAATCCCGCACCCT

>1183

GCGAGCTGCTGTCTGACCAGCAGCTTGGGATTGGTGGAAGGAAGCAGGCCAGGCCCT  
GTGAGGAGTCAAGGTGAGACGCTGAGGAGGACTCAGGAGGCCACCACCCAGATAG  
AAGACCCCAAATAATCCCGCACCCTC

>1184

GAGCTGCTCTGTCTGACCAGCAGCTTGGGACTGGTGGAGGGAAGCGGGCCAGGCCCT  
GTGAGGAGTCAAGGTGAGACGCTGAGGGAGGACTCAGGAGGCCCCCCACCGCAGATA  
GACAATCCCAAATAATCCCGAACCCT

>1185

TCTGAGCAGACAGGCCAACCGGAGGACAGGATTCCCTGGAGGCCACAGAGGAGCAC  
CAAGGAGAAGATCTGTAAGTAAGCCTTTGTTAGAGCCTCTAAGATTTGGTTCTCAGCTG  
AGGTCTCTCACATGCTCCCTCTCTC

>1186

TGACCAGGATCACCAGGAAGCTCCAGAGGATCCCCAGGAGGCCCTAGAGGAGCACCA  
AAGGAGAAGATCTGTAAGTAAGCCTTTGTTAGAGCCTCCAAGGTTTCAGTTTTTAGCTG  
AGGCTTCTCACATGCTCCCTCTCTC

>1187

TCAGCGGACAGGCCGGCCAGGAGGTCAGAAGCCCCAGGAGGCCCCAGAGGAGCACC

GAAGGAGAAGATCTGTAAGTAGGCCTTTGTTAGGGCCTCCAGGGCGTGGTTCACAAAT  
GAGGCCCCTCACAAGCTCCTTCTCTC

>1188

CTGTGAGCGAGGACCCGGTTCCGCCCCGAAGGATGAAGACTTGTCTTTAAAGATGACAA  
CGTACAGGAAAGGTCCATCAGCCGATCTCCCCCTGCCTGGGCCCACAGCGCCCCC  
ACCCTCACCACCTCTCTCACTGC

>1189

TCTTCCTACCCATCTGCTCCCCAGAGGGCTGCCTGCTGTGCACTTGGGTCCTGGAGCCC  
TTCTCCACCCGGTGAGTGGCCAGCAGGGTGTGGGGTTATGTGAGGGTAGAAAGGACA  
GCAAAGAGAAATGGGCTCCCAGCT

>1190

GGCGGCACGGCTCGGAGGCAGCGGTTGGGCTCGCGGCGAGGACGGGGTCGAGTCAG  
TGC GTTCGCGCGAGGTGAGAGCGGGCAGGGCGCGTGTGCGGTACCTTGGCTTGGGCC  
CGGGAGAAGATGGA ACTGCGCGGGGGT

>1191

GCTCAAAGGCCGGCCATGTAAGATCGTCGAGATGTCTACTTCGAAGACTGGCAAGCAC  
GGCCACGCCAAGGTTAGAATTTACCTCCGCATCTTGCCTTCCCCATGCCTCCAGTATC  
TTTGGCCCCCTCCCAGCAGCAAGC

>1192

GAAATATGAAGATATCTGCCCCGTCAACTCATAATATGGATGTCCCCAACATCAAAGGA  
ATGACTTCCAGGTATGTAGATGGTCTGGATGAGGATGGGTTAGCGGTTTATGGTGGAGG  
GAGGGGTTGGGGGATAGGGACT

>1193

CCTTCGTCTCCCTGAGGGAGACCTTGGCAAGGAGATTGAGCAGAAGTACGACTGTGG  
AGAAGAGATCCTGGTATGGTGCCTCCCTCCCTGCTTTTGTGCTCAGCTTTGTTCTGTAC  
GTTTCTTCCTGAGCTCAGACATCT

>1194

CGGTGCTGTCTGCCATGACAGAGGAGGCAGCTGTTGCAATCAAGGCCATGGCAAATA  
ACTGGCTCCCAGGTGAGTGTGACAAATCCCTCACTGTCCCCTTCACATTTTGTGTCT  
CAGCAGAGCTGCTGTAGTCTTAA

>1195

TTTACTCGCACAGCCTCCTGCCTGTGGACATTCGACAGTACTTGGCTGTCTGGATTGAA  
GACCAGAACTGGTGAGGCCTTCAGGAAGTTGGGGGAATGAAAAAGGTGGCCTTCCAC  
TTCTGGGCCCCCGGGATCCTGGAA

>1196

CCGTTGCAGCCAGGACCCAGAGTCCTTGTTGCTGCAGCACAATTTGCGGAAATTCTGC  
CGGGACATTCAGGTACTTGGAACGGTTGGGAGTGATGGGGTAGCACTGGGAGCAGAG  
CATAGAGGAGTAAGGTTTGGAGAAT

>1197

GGCTGAGATGATCTTTAACCTCCTTCTGGAAGAAAAAGAATTTTGATCCAGGCTCAG  
AGGGCCCAATTGGTGAGGACAATTCAGTGGAATGTTGGAACTCCTGAAGTAGAGAG  
GAACCATGGAAAGGACTCAGGGAG

>1198

CGAAACACCTGTGGAGAGCCAGCAACATGAGATTGAATCCCGGATCCTGGATTTAAGG

GCTATGATGGAGGTTAGTAGATGTGGTAGGAGTTAGGGTTGACAGTGTTTCAGCCTAAC  
ACCTCCCTGAGAAGCAGCCTCATC

>1199

GTAAATCCATCAGCCAACTGAAAGACCAGCAGGATGTCTTCTGCTTCCGATATAAGAT  
CCAGGCCAAAGGTAGGAAGCACATTGAGGGGCTGGAGAAAGATAAGTGCCTGCTGAG  
AAGCCGGAGCTGGAAGTGAACAGG

>1200

GGACCCCATCAGACCAAAGAGCAGAAGATTCTGCAGGAACTCTCAATGAACTGGA  
CAAAAGGAGAAAGGTGGGAGGCAGCAGAACAGAACATGTGGGCAACAAGGACCTGA  
AAAAATGAGGGATGTTGGGAACCCTGG

>1201

GGAAGGCCCAGCAGCAAAAAGCCTGCATCAGAGCTCCCATTGACCACGGGTTGGAAC  
AGCTGGAGACATGGTGAGAGGTACCACCCCAACCCTCGTCCTCGCCATGCGCTGTGAT  
TTGTAAGTTGCAGTGCCCTGCATAT

>1202

ACCCTCTGACCAAAGGGGTGGACCTACGCAACGCCCAGGTCACAGAGTTGCTACAGC  
GTCTGCTCCACAGGTCTAGAGGCCAGGCAGGAACCCTGGGGGAAAGAAGGAACAAG  
GGAAGCCATTCTTACACATACTGAGCT

>1203

CCTGCATGCCCCAAACTCCCCATCGACCCCTCATCCTCAAGACTGGCAGCAAGTTCAC  
CGTCCGAACAAGGTTGGCATTCCAGAACTCATTCCCACTTCCTTTTTCCAACCCTGCCA  
CTGTGTATTTTCTGGCTTTACAG

>1204

TTCAAACCAGAAAACTTTGACCCCCGAGAAGGGGCAGAGTCAGGGTTTGATTTGGGA  
CTTTGGTTACCTGGTAAGAATAGTTTGTGACCTATGCTTTTATTACTATTTTATTTTTC  
GAGACGGAGTCTCACTCTGTCC

>1205

GACAGAGGAACTGCACATCATCAGCTTCACGGTCAAATATACCTACCAGGGTCTGAAG  
CAGGAGCTGAAAGTGAGTGAAAATGGAGGGCAAGGAGAGAGAAAGCAGCTTTGGAA  
GAAGGCATAAGAAGGGGATAAACAGA

>1206

CAACATGAACCAGCTCTCAATTGCCTGGGCTTCAGTTCTCTGGTTCAATTTGCTCAGCC  
CAAACCTTCAGGTAGGGGAGTGGGGCCGACAGGTCCCGGCGCGAGAGCAGGGGTGT  
GGAAGCTTGGTGTGATAGGTTGCTT

>1207

CAGTTCTCCTCCTATGTTGGCCGAGGCCTCAACTCAGACCAGCTGAGCATGCTGAGAA  
ACAAGCTGTTTCGGTACAGATTTCTTTCTCTCAGCCTTTCCCCAGCCTTAGTCTTTTCT  
GTCCCTCTGTCCTATCTATCCC

>1208

CATTCTGGACATGGCTGGACAAAATTCTGGAGTTGGTACATGACCACCTGAAGGATCT  
CTGGAATGATGGGTAAAGCCTTGGTCACCCTTCCCTCATGGGCTTGTGCTTCCGGGCTT  
GAGAGTGGAGTCTCTGCACCCTC

>1209

TTTCTACTGCGCTTCAGTGAATCGTCAGAAGGGGGCATTACCTGCTCCTGGGTGGAGC

ACCAGGATGATGGTAGCTGCTCTGCCCTGCCATTCCCACAGCCTCTCCTTTCTGCCTGG  
CTCTCCTCTGGCCCCCTCTGCCTG

>1210

AACCCACTGCGCTTCCTCTATCCCCGAATCCCCGGGATGAAGCTTTTGGGTGCTACTA  
CCAGGAGAAAGGTGGGAATCGTTGACATACTTCATTGCTAGATTGCAGAGATCTACCA  
GACATCCATAGATCCCACTCCTT

>1211

GTATCACAGCCAGTGCCAGAGCCAGATTTGCCCTGTGATCTGAGACATTTGAACACTG  
AGCCAATGGAAAGTAAGTGATGAGATGGAGTGGCACACATTCCCTTTCTACCTCTTCT  
CCCTCTCCCATACAGAAAAAGC

>1212

GGTCACCCGTGTATGGCACCCCTGCCATACCAGCTCACCCCTGCCCTGTGACTGCTTGTA  
AGCTAAGGTGGGTATTTCTGGCCACAGATGCAGCATTGACTGTAGTTCTGAGGCTACTA  
GTGAATCCAGAACTGTCTACAG

>1213

AGTGTGAATGTGGACGAAGAAAAGAGATGGTGATTTGCTCTGAAGCATCTAGTACTTA  
TCAAAGGTTAGTGTTACTTAAATGTTAACAACCTGATGGCCTAGGTGAAACAGATACATG  
TGTTTTGTTTTGTTTTTAAAGCT

>1214

CAGACATGCAGCTTGGAGGTTCACTGGAGATCAGCAAGTTAATTACCAAAAAGGAAG  
TTCATCAAGCCAGGTAATTTTAAATGCATATATGTGCCTTCTTTCTTCAATTAGACTTC  
AATTAGAGGGCAGAGATTATTC

>1215

ACCTTGCGAGCCGTCTTCCCCAGGCCTGCGTCCGAATCTCCGCCGCTGCGGGCCCCGCT  
CCGACGCGGAAGGTGAGGGCTGGGGGAGGGGACCGGCGCTGACGGAGCCGCAGTGC  
GGGTTCGGGTCTGTGGCGGACAGAGA

>1216

TGTCCTACTGGTGGAGGCCGTGGTCGTGGAATGAGAAGCCGTGGCAGAGGTGGTTTTTA  
CCTCGGATAGAGGTATTTTGTGCAATAGAAAAATTTGAAGTACTTCAGTATTTGTTAGTA  
TCAAGACTGGTCTGACTAGCCG

>1217

CTTCCAGATATTTGTTATCGCTGTGGTGAGTCTGGTCATCTTGCCAAGGATTGTGATCTT  
CAGGAGGATGGTAAGTATTTAACACTTCCTTTTCATACCCCTCTAGAGCTTGGAGAGGT  
GAGCACATGCAACTGTGTATA

>1218

AGCAGAAATGCTATTCTTGTGGAGAATTCGGACACATTCAAAAAGACTGCACCAAAGT  
GAAGTGCTATAGGTAAGGTGTCAGAATGTTGTTAGAAGAAACTCATTGCAGAGATTCT  
TTCCAGAGATGAATTAGCTATAAA

>1219

GACACCATGAGGAACAGCGCCTCTGGCCCCGGATGGTACGGCGCCAACCCAGACCCG  
CGTTCCCCGCCAGTAAGTGAGGCCGCCCACTGCGGGGCCGCGGGCTGAGCTCAGG  
AGGTGCGGCGAGAGGCTCCAGAAGGC

>1220

CGCCGAGCTCCAGCCCCGAGCCCTGGACATCTACTCTGCCGTGGATGATGCCTCCAC

GAGAAGGAGCTGGTCGGTATTCCCCTCGCTCTCGACCCCCTTGACGTGTCGCCTTGTCT  
CTTCTCTTGACGCCTCCCTCCT

>1221

AGAAGTCTTGAAGAAGCTCAAGAGTAAACGTGTTCCCATCTATGAGAAGAAGTATGGC  
CAAGTCCCCATGGTAAGGTTTGTGGTCACTCCCTTCCCGTGTTTTTCCAAGAGAAAGTA  
CACCGCCTTGAATCGTACACACA

>1222

GAATAAGGCAAGGGGGAGTGTAGAGCAGAGCAGAAGCCTGAGCCAGACGGAGAGCC  
ACCTCCTCTCCCAGGTATGTGACACTCCCCATCCCCCTTCAGAGGCCACACACCCTATG  
GCATTCCCACCATGTGTTAAGGATT

>1223

GCAGGAACTGAACCCAAAGGATCACCTGGTATTCCCTGAGAGTACAGATTTCTCCGGC  
GTGGCCCTCAAGGTTAGTGAGTGAGCAGGTCCACAGGGGCATGATTGGATCCTGGAAT  
GAATGAATCAACCATGAGAGAGTG

>1224

TCTCAATGTCTGCATGAACGCCAAGCACCACAAGGAAAAGCCAGGCCCCGAGGACAA  
GTTGCATGAGCAGGTGGGCCAGGGGGTGATCTGGGGTGGTGAGGGACTGGCTCAGGA  
AGAGGAAACGAGGACATGGAAATGCC

>1225

CAAACGGCATTTTCATCCAGGACACCTGCCTCTACGAGTGCTCCCCCAACTTGGGGCCC  
TGATCCAGCAGGTATGCATGGCTTCCTGCAGGTACAAGACCTAGCGGAGCAGCTGAG  
CTTCCAGGCATCTCTGCAGGCTG

>1226

TGGTGGGAAGATTGTTCGCACCTCCTACACCTGCAAGAGCAACTGGCACAAGGGCTGG  
AACTGGACTTCAGGTGAGGGCTGGGGTGGGCAGGAATGGAGGGATTTGGAAGTGGAG  
GTGTGTGGGTGTGGAACAGGTATGTG

>1227

TCTGCCTGGCAGAGGAGTTTCTTCAGGAAGAACCAGGGCAGCTTCTGCCCCCTAGAGG  
GCCAATGCCCTTGGTGAGTGCAGTCCCCTGGCCCCAGCCTGGTCCACCTCTGGGAAGA  
GGGTGCCCAGTTGTGCAATCCAGGC

>1228

TTGGGGAGACCTGATCTGGCTGTGCCAGATGGACACTGAGAAAGAAGTAGAAGACTC  
AGAATTAGAAGAGGTGAGTGGGCTTTGGTGGCGGGCTCCCTACCCCACTCCCTGCCCT  
GGGCTGCCTGTGACCACACTGCTTG

>1229

CTCCCTACACCACACCCATACTCAGCCCCTGCAGGCAAGGAGAGAACAGGTCAGGTTC  
CCGAGAGCTCAGGTGAGTGACACGTTGGAATGGCCCAGGGCACCTTCACCCTGCTCA  
GCTTGTGGCTCCAACATTCTAGAAG

>1230

GCACTGGGGCCCCTGCAGAGCTTCCAAGCCCCGACCTGATGACCTGCTCATCAACACCT  
ACCCCAAGTCTGGTAAGTGAGGAGGGCCACCCACCCTCTCCAGGCGGCAGTCCCCA  
CCTTGGTCAGCAAGGTCGTGCCCTC

>1231

AAGTGTAACCGGGCTCCCATCTACGTACGGGTGCCCTTCCTTGAGGTCAATGATCCAGG



GGAACCCTCAGGTGCATGGCTGGGTCCTGGGGGTAAGGGAAGTGGAGGAAGACAGG  
GCTGGGGCTTCAGCTCACCAGACCT

>1232

CCCACGGCTCATCAAGTCACACCTGCCCCCTGGCTCTGCTCCCTCAGACTCTGTTGGATC  
AGAAGGTCAAGGTGAGGCCGGCCTCAATGGTTCACACCTGTCATCCCAGTTTGAGACT  
GAGGAGGGAGGATCCCTTGAAGG

>1233

CGTATGGAAAAGGCGCACCCCTGAGCCTGGGACCTGGGACAGCTTCCTGGAAAAGTTC  
ATGGCTGGAGAAGGTGGGCTTGACTGGAGGAAGGAGGGTGTGAAGCCGAGGGGTGG  
TGGCTATAACGTACAGCAACCCTGTGT

>1234

CGTGCAGGAGTGGTGGGAGCTGAGCCGCACCCACCCTGTTCTCTACCTCTTCTATGAA  
GACATGAAGGAGGTGAGACCGACTGTGATGCTTCCCCCATGTGACACCTGGGGGCA  
GGCACCTCACAGGGACCCACCAAGG

>1235

CCTATGACCAACTACACCACCGTCCCCCAGGAGCTCATGGACCACAGCATCTCCCCCTT  
CATGAGGAAAGGTGGGTGCTGGCCAGCACGGGGGTTTGGGGCGGGTGGGAGCAGCA  
GCTGCAGCCTCCCCATAGGCACTTG

>1236

AGAGACAGCATCGTCGGGACCAGACTCGTCTCAGGCCAGTTGCAGCCTTCTCAGCCA  
AACGCCGACCAAGGTACAGCTTCAGTTTGCTACTGGGTGTGCATTCAGCTGAATTTCA  
TGGGGAAGTCCAAATTCTAAGGAA

>1237

ATACCCAGATGCTGTGGCCACATGGCTAAACCCTGACCCATCTCAGAAGCAGAATCTC  
CTAGCCCCACAGGTATTTTTAAACTTCTCATAATTAACTACAGTGATGAAAGATAGCC  
AACTCAGGCCATTTGGGCTGCT

>1238

TGGCCGAGGTGATAGTGTGGTTTATGGACTGAGGTCAAAATCTAAGAAGTTTCGCAGA  
CCTGACATCCAGGTAAATCCTTTAACAGACACACCTGATGGTTCTGACTAGCGCTCAAG  
TCTAGGAAACCACAGTTTGCATA

>1239

ATGCACGGGCAAGGCGTGTGCATGGAGCTGGCGGAGATCGAGGCCATCCAGGAAAGC  
CTGCAGCCCTCTGGTAAGGTACCCCTGCCTCCCAATTCCCTCCTGAGTAGCGCTCCCTT  
CCCAGCGGCTTCTTCCCCATTCCA

>1240

TCGAGACCGGAGCACCAAGTGGGGGCAAGATGAAGGTCAATGGGGCGCCCCGGGAGG  
ATGCCCGGCCTGTGGTAAGGACCTCCGATGCACAAATGTGCATGTGCATAGACACACA  
CACACACATGCCCCCTGCCCCCA

>1241

CACCCACGAGGACCTCTACTTCATCCCCATCCCCAACTGCGACCGCAACGGCAACTTC  
CACCCCAAGCAGGTGGGTCTCTGTCTCCCGCTGGCTTGGCCCTGGACTCAGCTCTGGG  
GCATGGTCTCTTTTCTGCGTCGG

>1242

CACCCCATTGCCCTTCATTGGAAACTACCTGCAGCTGAACACAGAGCAGATGTACAAC

TCCCTCATGAAGGTGTCCCAAGACAGGGAGATGGGTGTCTCGGGGTGGGGGCTGCCTA  
GTTGGCTGGGGCTTTGTGGCAGGG

>1243

GTGGACCAGGCTGAGGAGTTCAGCGGGCGAGGCGAGCAAGCCACCTTCGACTGGGTC  
TTCAAAGGCTATGGTGCCCAAGAGGGGGAAGGTGGGCAGGTGGACACGAAGGTCTCA  
GTGTTCCCAGCCTTCTCCCTGACTCT

>1244

AAGCGAGGCATCGAGGAGCGCATCCAGGAGGAGTCGGGCTTCCTCATCGAGGCCATC  
CGGAGCACGCACGGTGAGCAGGGGACCCCGAGTGCGGGGGCAGGAGAAGGAAAACA  
CCCAGGACGAGGAACCCGCGCGCGTTC

>1245

CAAAGAGTTCCTGTCACTGTTGCGCATGATGCTAGGAATCTTCCAGTTCACGTCAACCT  
CCACGGGGCAGGTAATGGTTGCAGCCCGGCCCGTGAAGGCCCTTACCAAACCGGCA  
AATTGTTCCCCTACCGGGGGAAGG

>1246

CAACCAGCGCACGCTGGATCCCAATTCCCCACGGGACTTCATTGACTCCTTTCTCATCC  
GCATGCAGGAGGTACACCCACAGCAGCCACTGCGGGGAGATGCAAAGCCAGGCAGAGG  
GAAATCAGTCTGGGAGTGGGGCAG

>1247

GGCACCGAGACGGTCAGCACCAACCCTGCACTATGGCTTCTTACTGCTCATGAAGCACC  
CAGAGGTGGAGGGTAAGGCTGGAGGGGGACGGAAGTGGAGGGCCCCAGACCCTCAA  
AATTCCCCTTCGACTGGTGCAATGTC

>1248

CGTGATCCCCATGAGTTTGGCCCCGAGAGTCAAAAAGGACACCAAGTTTCGGGATTTC  
TTCCTCCCTAAGGTGCTATCCGCCCCACCCCCAGACTACGGGGACTCCAGCCCCTCT  
CTGTGTCCCACAGCATCCCACCCA

>1249

AATCCCCAGCACTTCCTGGGTGAGAAGGGGCAGTTTAAGAAGCGTGATGCTTTTGTGC  
CCTTCTCCATCAGTAAGAGACCACTGTTTGGTGCCAGGCTTACTACTCACACCAGCAG  
GGGCCTCCCTTACCCAGTTCCCCT

>1250

CACCCCATTGCCCTTCATTGGAAACTACCTCCAGCTGAACACAGAGCAGATGTACAAC  
TCCCTCATGAAGGTGTCTTAAGGCAGGAGATGGGTGGCACGGGGTGGGGGCTGCCCC  
GTTGGCTGGGGCTTAGTGGCAGGGG

>1251

GTGGACCAGGCTGAGGAGTTCAGCGGGCGAGGCGAGCAGGCCACCTTCGACTGGCTC  
TTCAAAGGCTATGGTGAGGGGGTGCCAAGAGGGGGAAGGTGGTCAGGTGGATGCAAT  
GGTCTCCGTGTCCCCAGCCTTCTCCC

>1252

AAGCGCGGCATCGAGGAACGCATCCAGGAGGAGGCGGGCTTCCTCATCGACGCCCTC  
CGGGGCACGCACGGTGAGTAGGGGACCCCGAGTGCGAGGGCGGGAACCCGCGCTTTC  
TGCCTGGGGATGGGGACTAGGTGGGG

>1253

CAAAGAGTTCCTGTCACTGTTGCGCATGATGCTGGGAAGGTTCCAGTTCACGGGAACC

TCCACGGGGCAGGTAACCTGGATGCAGCCCCGCCAGTGACGCCCCTACCACAACCTGCC  
AACTGCTCCCCTACCTGGAGACAGG  
>1254  
CAACCAGCGCACGCTGGATCCCAATTCCCCACGGGACTTCATCGACTCCTTTCTCATCC  
GCATGCAGGAGGTACATCCCAGCAGCCAGTGCAAGCCAGGGAGAGG  
GAAATCAGGATGGGAGTGGGGTGG  
>1255  
GGCACTGAGACCGTGAGCACCACCCTGCGCTACGGTTTCCTGCTGCTCATGAAGCACC  
CAGAGGTGGAGGGTAAGACTGGAAAGGGAGGAAAGTGAAGGGCCCCAGACCCTCAA  
AACTCCCCTGAGCCTGGTGCAGTGTA  
>1256  
CATGCTCCCCATGGGTTTGGCCACAGGGTCAACAAGGACACCAAGTTTCGGGATTTC  
TTCTCCCTAAGGTGCTGTCTCCCCTCCACCACCACCTCAGACTACGGGGACTTCC  
AGCCTCTCTGTGTCCCCAGAAT  
>1257  
AGTCCCCAGCACTTCCTGGATGAGAAGGGGCAGTTTAAGAAGAGTGATGCTTTTGTGC  
CCTTTTCCATCGGTAAGAGACACTGTTTGCTGCCAGGCCACGGCTCACACCAGCAGGG  
GCCTCTCTCACCCACCTCCCCTCT  
>1258  
CACGCCGAACCTGCATGCCGAGCCCCGGGGTGATGACTGGAGGGTCAGCCTGGAAGAC  
CACAGCAGCCAAGGTGAGCATTAAAGCAGGGCAGCTTTGCCCTGGGTGGTTGAAGCG  
CCAGGCTGGAATGAGTAAGGTCTCCA  
>1259  
ACCCGCCACCGGTCCTTATGGAGCCCAGGAAGAACTCCGTGTAGACAAAGCCCCAC  
TGAATCCCACTGGGTAAAGTGGAGTCCCTCACTTGGCCCTCTCAGTGTTTTACTGCTTTTC  
GATTCCTTGATCCCTAGGCTGTG  
>1260  
GCTGCAGTTGGAGCCGCCACCGTGTTGGAGACCCTGCGGCGCGGGAGTAAGTTCAT  
CAAATGGGACGAGGTAAGCGCGCGGGCCCCTGCTCCGCCCAAATCCCGGGACTCTTTC  
AGTCAAGCTCGACCAGACGCTGGGG  
>1261  
CAGTCGGAACCTGGTGACCCTGCGTGTGGACCCCAATGGCTTCTTCTTGTACTGGACG  
GGCCCCAACATGGTGAGGGTGGGCGCTGGTGCAGCTCGCTCAGGCCAAGGACCCCTG  
TCCAGACCCCTGCCCTGCCCGTGG  
>1262  
GGTGTCTGGGCCAGACCCGGTGAACACAGTGTTCTTGAACTTCATGGCCGTGCAGGAT  
GACACAGCCAAGGTGGGCTGGCACCAAGGGGACGAAGGGGGAGTCACTGTCTTATTC  
TGTGAGTCGGCCGTCACTTACCGAA  
>1263  
AGGAGCTATTCAAGCTGGCTATGAACATCCTGGCTCAGAACGCCTCCCCGGAACACCTT  
CCTGCGCAAAGCGTGAGCCCCAGGCCACCCGAGGGGGAGCCGGGGGGTTTACGTGG  
CCGTTTTTCAGGGTGTGACCTCTTCAT  
>1264  
GAAGATGTTCTCAGCAGACAAGAAGCGGGTGGAGACTGCGCTGGAATCCTGTGGCCT

CAAATTCAACCGGGTGTGTGGGGTGGGGACAGGGGCGGGGTGTGGTGTGTACGGTG  
GACACCCACCCCTACGGGGGTGCCCCG

>1265

TGGAAATCTTTGAGCGGTTCTGAACAAGCTGTGTCTGCGGCCGGACATTGACAAGAT  
CCTGCTGGAGATGTGAGTGGGCCCCGGCCTGCCTCACAACCCCTGTGCTCTGTGTTAG  
CTTCTGCTTAGCGTGCCTCTAGCT

>1266

CCCCTGCGGCCCTCCCAGGCCCGGCTGCTCATCGAAAAGTATGAGCCCAACCAGCAGT  
TTCTGGAGCGAGGTGAGCTGGCTGGGGTGCAGGTGGGTGGGGGCAGGTGGGACACC  
AGCTGACCCTGCTGATCCTCTCCAC

>1267

CTGAGCACGGACATGACCCAGCCACTGAGTGCCTACTTCATCAACTCCTCGCATAACA  
CCTATCTCACTGGTGAGTGGGGAGCAAGGGTGGCACCCGTGACCTCTGCCCTGTGACC  
CTTGACAGCCCCACTCCTCCTGG

>1268

CCATTGCCGAGACTGCCTTCAAGACCTCGCCCTACCCCGTCATCCTCTCCTTCGAGAAC  
CATGTGGACTCGTGAGTGAGCCCCTGGCATGAAACCCCATGGACTGGGGGACAGTCTT  
CCAGCTTCAGTGCTGTTGGACTG

>1269

AAAGATGGCTGAGTACTGCCGCTCCATCTTTGGAGACGCGCTACTCATCGAGCCTCTG  
GACAAGTACCCGGTACGGGAGCTCGGAGCGAGGGGGGTGGCATGGGGGCCAGGGTG  
CTGCGGACCCGGTCCAGGGCCCTGAC

>1270

CCCCTGGAGCAGAGCAATTCTGCCCTGAGCGAGAGCTCCGCGGCCACCGAGCCCTCC  
TCCCCGCAGCTGGGTAGGCCCCAGCCCGGCCCGCCACCCTGATCGACCCTAGCCTCTG  
GCCTCATGTTCCAGGCGCCGTGACA

>1271

CCGTGAGGATGAGGAGGAAGATGAGGAAGAGGAGGAACAGACAGACCCCAAAAAGC  
CAACTACAGATGAGGTCAGGCCACAGGGTGGGCAGGTCGGGGAGGTAGCATCTATTT  
ACCTCCCAGGGGGCTGGGTCTAACCA

>1272

ACTGAGGAGATGTCCACGCTTGTCAACTACATCGAACCTGTCAAGTTCAAGTCCTTTG  
AGGCTGCTCGAAGTGAGTGGGGGTGGGTGGCAGGCATGGGAGCTTGCCCAGCTCAGC  
CCTGCCAGGTCTGACGCCCTTTCTT

>1273

TCGAGATGTCGTCCTTTGTGGAGACCAAGGCCATGGAGCAACTGACCAAGAGCCCCAT  
GGAGTTTGTGGAGTATCCTTTGAAGGTGCTGTGGGCGGACAGGCCAGGGTGGGGCGC  
TCGGAGGCCGGCTCCGGTGTTCTAT

>1274

TCCAACCTACATGCCCCAGCTCTTCTGGAACGTAGGGTGCCAGCTTGTTGCGCTCAACTT  
CCAGACCCTCGGTGAGCCCTGGCCCCCTCCATCTTGACCCCGACCCTCAGTCTTACTG  
ACTTCTGACCCACGATCCTGCTG

>1275

GGACAAGTCCTTCGACCCCTTCACTGAGGTCATCGTGGATGGCATCGTGGCCAATGCC

TTGCGGGTCAAGGTGGGGCTTGCGGGCGGCTCAGGCCAGGGGTGTCCTGGGGGCAGG  
ACTCTCAGCATCCGCCTCACCTCC

>1276

CCGCACCCGGACCTCTCAGGGGAACTCGTTCAACCCCGTGTGGGACGAAGAGCCCTT  
CGACTTCCCCAAGGTGAGCCTGGCCCCCTGCACCCGCCAGGCACAGGCAGATCCAGC  
CCAGACCGCCCCGACTCTCAGGTGGG

>1277

ATTGCAGCCTTTGAGGAGGGGGGTAAATTCGTAGGGCACCGGATCCTGCCTGTCTCTG  
CCATCCGCTCCGGTGAGGCCTTGGTGGGCTCTGGGCAGCACAGCGGGCAGTGGGTAG  
GGCCCCACCTGGCCCAGCAACCCA

>1278

CAACCGCTGTGCCTGCCGGCCCTGCTCATCTACACCGAAGCCTCGGACTACATTCCTG  
ACGACCACCAGGGTGAGCTGGGGGTGGGCGGGGCTGCCTGGCCAGGGAGTGTGAG  
GGACAAGGGCCACCCCCAGGGCCTGG

>1279

CCCCATTAAGCACGTCAGCCTGATGGACCAGAGGGCCCGGCAGCTGGCCGCCCTCATT  
GGGGAGAGTGAGGTGAGCCGGGGCAGGGCAGGGCTCAGGCTCACTGTGACCCAGGG  
GGCCGCTGGACATGACTGCTGTGGCC

>1280

CTGGATGCCTCCCCCGCCGGCCCCCTGGCCCCACCACCTCCCCTGCCAGCACCTCCC  
TCAGCAGCCAGGTAAGGAGTGGCCTGGGTCGGGGGTGGGTTGCAGGGAGGCACCCC  
CCACCCTGTCCTCCAGCTCCTCACA

>1281

CCCGCCGCCTGCTGGATGGCCTGGCTCAGGCACAGGCTGAGGGCAGGTGCCGGCTGC  
GGCCAGGTGCCCTGTGAGTGTCTGGGCCGCCTGTGTGCTATGTGTGCTGGGTGTGCTG  
ATGTGAACATGGGGGTCTGGTGGGCA

>1282

GAGCCTGCTGGAGCTGCGGGAGGCCCAGGTGGACGCAGAGGCCAGCGGAGGCTGG  
AACACCTGAGACAGGTAGGGGGCCTGCAGTGGCCAGGGAAAGCCTGCTGGATAGACC  
CGTCGTCAGCCGGCATCACCTGTCAG

>1283

AGCGGCTCAGGGAGGTCTCCTTGATGCAAACACAACCTCAGTTCAAGAGGCTGAAAG  
AGATGAACGAGAGGTGAAAGCCGAGGATTGTCTATGGGAAGGGCTGGGGACTTCTAG  
TACCAGAAGGAGGGCAGAGTCTGTGC

>1284

AGATCCTGGACAGAAAGCGCCATAACAGCATCTCGGAGGCCAAGATGAGGGACAAGC  
ATAAGAAGGAGGCGTAAGGGCACCGGGACCGGGGGCCATCTGGGTACTGGGGAGGCA  
GGGCAGGTGTCTGGGCCCCGAGCCAT

>1285

GCAGCGGCATGACCGTCTTGTGGCTGGGCAGCAGCAGGTCCTGCAACAGCTGGCAGA  
AGAGGAGCCCAAGGTGAGGCCATGGGCGAACAGGTGGGCAGACGGTGTGCAAGGCA  
GCCAGGCCTCGCCTGTGATGCCCATCC

>1286

AAGCCGCACGGCCCTGCCCCACAGGCCCTACAGCCTCCACAGCCACTAAGCCTGCA

CCCCAAGTGAAGGTGACTGAAGGTGGGGCAGGGGGAGGAGGGAGGCAGGCATGTC  
AGGGGTGGAGGGGAGCTCTTGGCCATG

>1287

TGGGAGCCCCAGAGAGGCTGGGGAGGCTGGGCCTCCAGGGCTATGTGCTGGAGCTC  
TGCAGAGAGGGAGGTGAGTCGTCTGGGGCTAAGTCTTGCATACATCCAGGGGAGGTTGT  
CATGGAGGGCTGCAGGGACAAGTGC

>1288

GCAGTTCGTCTCTGCAGGGGCTGGCCCCGCCGCCATGCTGGACCAGCCCATCCACATCC  
GAGAGAACATTGGTAAAGCCCATCCTGGCCTTCAGCTACCCAGCCCTTCCCAAACACC  
TTATCTAATGGAGAACTGAGGCC

>1289

CCCCCGCCACCTCCGTCAGACCTACATCCGCCAGGTGGGAGAGACGGTCAACCTGCA  
AATCCCCTTCCAGGTGGGTATTACCCCCACCAAGGGTAACAGCCTGGGTGGGAACCAG  
GGCCCCCATTTAAGGGGAGCCTGGG

>1290

GGCCGCTACGAGCTCACTGTGCGCGTGGAAGACCTGGAGGCCAAGGCAGTCATTGAC  
ATCCTGGTGATTGGTATGGAGCCAGGGGAACAGTGCTGTCTCATGGGGACCTGGAGC  
CCCCAACCTCCTATCCCAGAGCTGA

>1291

GCCACCCCAGGACACAGGCAACACAGAGCTCCTGGGCTACATGGTGCAGAAGGCAGA  
CAAAAAGACAGGGGTGAGGCTGGCTGAGGCAAAGTGGGGTCGGGGTACGAAGTGGT  
CAAGGTGGTGGGAAGGCCCATCCAC

>1292

TCAGAAAACCTGTGTGGACTCAGCACCTCGGCCACCGTCACCAAGGAGCTCGCCCAC  
ATCCAGAAGGCAGGTGGGTTTGGGGCCGGAGCTGGCTGTGCTAACTCTCTCCCTGTCT  
CTGCTTCTTCCTCCGCGTCTCTGCA

>1293

CCTGGCTGACCACACCTCCACCCCTGGCTACAGCACCCAGTTGTTCTGCAGTGTCCGA  
GCTTCACCCAAGGTGAGGGGCCAGGCCCTGTTGTGCCCTGGGCTGGTGGGGGCAGGT  
GGGGACAGCAGGGCTGAGGAATCCT

>1294

GGGGTCTACACCTGCAAGGCCATAAATGTGCTGGGGGAGGCATCTGTGGACTGCCGGC  
TGGAGGTCAAAGGTGAGAGTTTGAGGACGGGAGAACAGGAGTAAGCACCTCTCTGGA  
ACTGGACTAGAGGCAGCAGACAGCT

>1295

GGCCTTGGCAGGAGGATGTGGCAGATGCTGAAGAGTGTGCTGGTCGCTGTGGGCTCTT  
AATGGACTGCTGGTGAGTGGCCACTGGGCCTAGATAAGACTGGGGGCAGGGGAGCCT  
GGGCCGTGGCGTTACCCTGTGCCTT

>1296

ACACCATGGCCACGACCGTGGGTGGCCTGTCCTGCCAGGCTTGGAGCCACAAGTTCCC  
GAATGATCACCAGTGAGACAAACACCTTCCCTCCATCCCGGCCTGGGACCTTCCCCCA  
GCACACACTATAGTGATGCTCTGG

>1297

GGTCCTTGGTGCCACACAACAGACCCTGCCGTGCGCTTCCAGAGCTGCGGCATCAAAT

CCTGCCTGGTGGGTAAGCGGCGCCGGGTCAAGCTGGGAGAGTGGAGGGACAAGCCCA  
CGCCCATCCACGAACCCACTGGCTC

>1298

CCGAGTCAGGGCGCGAGTGCCAGCGCTGGGATCTTCAGCACCCGCACCAGCACCCCT  
TCGAGCCGGGCAAGTACGCGTAGGCGGTATCGGCGCCCTGGGGGCCGGGCTAGGGAA  
GGTCCAGGACTCCAGGGGCAGGGCTC

>1299

TCCCAGCGGCCATGGTGCTACACTACGGATCCGCAGATCGAGCGAGAGTTCTGTGACC  
TCCCCGCTGCGGTAGGCGGCGGGGACCAGGCCTGGGAGGGTACCTGGGAACCTTGG  
GGAGGGGCGTGGCTTGGCCGGGAGG

>1300

TACCTTGCCAGCGTTGGGACGCGCAAATCCCGCATCAGCACCGATTTACGCCAGAAAA  
ATACGCGTGCAAGTGAGGTGGGGGGGCGGGCGTTGGGACGTGCTGCTGCGGGTGAGA  
CGGGAGGAGGGTAGTCACAGGCTTA

>1301

CTGCGGCCCCGGCACGCGCGTGGGCTTTTGCTACCAGATCCGGCGTTGTACAGACGACG  
TGCGGCCCCAGGGTGAGGCCCAAGCTTGGGGGCTACAGAGCCGGGGCTGGAAGCCTG  
GAACCGAAGGGCCGGGGCGAGGTCT

>1302

GCACGGTCAGCAAGACCCGCAAGGGTGTCCAGTGCCAGCGCTGGTCCGCTGAGACGC  
CGCACAAGCCGCAGTGAGTCCCTGGTGCTCCCGGCCCCGCCAGGGCCCTAACCTGG  
GGCGGCATGCTTTGATGTCTGGGACC

>1303

AGCCATGGGCCCTGGTGCTACACGATGGACCCAAGGACCCCATTCGACTACTGTGCCC  
TGCGACGCTGCGGTGAGCACTAGTGACGCTTGCCCCATGACCCTGCCTCAGCCCCAC  
CACCAAAGGCTGGCTCCCTTAACC

>1304

GTCGTTCCAAGCTGCGCGTGGCTGGGGGCCATCCGGGCAACTCACCTGGACAGTCA  
GCTTGGGGAATCGGTGAGGCACAACCTGCCTGTCTCCACAGAGAGGAGCTGAGGTTG  
TGTCTCTGTGGTTATGCCACTGGGG

>1305

AGCATTTCTGCGGGGGGTCTCTAGTGAAGGAGCAGTGGATACTGACTGCCCCGGCAGTG  
CTTCTCCTCCTGGTGAGCCTCCCTTGTTGTTGGGACCCAGTCTCATCCACCTTCCCCCT  
TTCCCCAGGCAAGCTAACAAGTG

>1306

AGCGGGTCCCAGTAGCCAAGATGCTGTGTGGGCCCTCAGGCTCCCAGCTTGTCTTGCT  
CAAGCTGGAGAGGTATGTGGACAACCTGGGAGGGTGTGAGGTGGGGCTGAGCCTTGT  
GGCCTCAGACCCTGAGTGCCCCCAT

>1307

CTGCCGCTGAATGATATGTGGTGCCTCCAGGGACCAAGTGTGAGATTGCAGGCTGGG  
GTGAGACCAAAGGTAAGAGCATAGTGACAGGACTGCTGGCGGCCAGGAGCCCAGCC  
CTGGATCTTCCTCCAGGACCGTCTC

>1308

GCACCGAGGACATGTGCGGGAGAGCGAGATGTGCACTGAGGGACTGTTGGCCCCCTGT

GGGGGCCTGTGAGGTTGGTAGCAGGGCCCTGGGCCAGCCCTGGAAGGGTATGGGGGG  
CTAGAAATGAACTATTTTATCATGAA

>1309

GCCTGTCTCCGAGCCAGTCGCTGACAGCCGCGGCGCCGCGAGCTTCTCCTCTCCTCA  
CGACCGAGGCAGGTAAACGCCCCGGGGTGGGAGGAACGCGGGCGGGGGCAGGGGAGC  
CGCGGGGGCCGAGTGAGGACCCCGGG

>1310

ATTTCAGCCATGTCTGAGCTTTCCGTCTTCCTGGAGGCACAAATCTAGTTTAGCTGAAC  
CACAACAGATTGTACATATCCTGCAGAACCTCTGTGGTCTTAGGAAGGTTGAAAGTCA  
CCAAATGTACAGAAAATGAGGG

>1311

CTGCTGCCATCCTCCAGCAAGATGCTAGGGTCTTTGGGGCTTTGGGCATTACTTCCCAC  
AGCTGTGGAAGGTAAGTGTCTACAGGGAGGGGAAGGGTCTCTCCATCCATCCAGCAA  
GGGAAAGGGGCGCTTGAAGCAAGA

>1312

TGCCTCTACAGCCGCTGCTGCTTTGGGATCTGGAACCTGACCCAAGACCGGGCACAGG  
TGGAATGCAAGGTGAATGGCAAAGTATATGGCAGGTGATGGCTAGGGTGGGAGACA  
GACACATCCTGGGGTGTGGGTGGCA

>1313

AATTACAGCCATCTGCCTCCTCCAGGGAGCCCTGGGACTCCTGGCTCCCAGGGTCCCC  
AGGCTGCCCCAGGTAGCCACCCAAGGGTACTGAAGCCTGATGGGGGCTGGGGCCCAG  
GTTAGGATGAGAGGTGGAACCAGGG

>1314

ATCTGGATGGCACTGGTGCTGCTGGGGCTGTTCCCTCCTCCTGCTGCTGCTGGGCAG  
CATCATCTTGGGTACTAATCCACCCCATCCCTCCCTTGTGACCCAAGACATTGCCCCA  
AAAGCTCTGACCCCTCTCCAGG

>1315

GCCAAGGCCAGACTCAGGCAGGGACTGGAGTGTGGAGCTGCAGGAGCTGCCTGAGCT  
GTGTTTCTCCCAGGTGCCCCAGGGAGGGAGAGAAGGGCTCCTCTGGGCACTCCTGGA  
GGTTGTGCTGGGGAGGAATCCTGGCC

>1316

CACTGCCAGCCGGGGGGGTCTGGCCGCCTGCTCTCTGGGCCCCTGCTGGTACTGGAA  
CTGCATCCCAAGGTGAGCACCAAGGAGTGATATGTGTGTGTGTGCCTGTGTGTATG  
TATAGAGGTGGGGGCTACATGGC

>1317

AGTTCCTGCGGATGGCACTGTCCCTGGCCCAGGGCCTGGCATTCTCCATGAGGAGC  
GCTGGCAGAATGGTGGGTGAGCTGGGCATAGGAAGTCAAGGGAGCCACAGTGCTATG  
TTTGTGATTCTGCCTTAGTTTGGAG

>1318

GCTCCCTGGCCTCACTCAGCCCCCTGCCTGGACCCCTACTCAACCACAAGGCCCAGCT  
GCCATCATGGAAGTGAGTTCTCTGGATAACTGGTGAGGCCCAGGATGATGTTGGTGCT  
GCTGATGGCAATGCAGCCATTGTG

>1319

CGAGCTGATATTTACTCTTTGGCTCTGCTCCTGTGGGAGATACTGAGCCGCTGCCCAGA



TTTGAGGCCTGGTAAGGATGGGTGGTACAGTCCCCTCTCCTGGGCTCCCCCGCCCAT  
TCTAGGTTACCCCCAACCTGAC

>1320

GCTATGGGCCTTGGCAGTGCAGGAGAGGAGGCGTCCCTACATCCCATCCACCTGGCGC  
TGCTTTGCCACAGTAAGAGGCCTAGGCTGTTGGTCTGGGAACCTGGAGAGTGGGGGC  
TGGGCATGGGCTTCAAGGACGTCTC

>1321

ACCTCTAGCCTACAGGGGCCTGGAGACCGGTTCCCGGGAGGTGGTCAGCCATGTAATC  
AAACAAGGGAAGGTGAGTCACCACCCCCAGGACAGACCCCAACCCCTGCCTGGCCAA  
CATGGTGAAACCCCATCTCTATTAA

>1322

CAAAATCATGCGGGAGCCCTGGGTAGAGCAAGACAAGTTTGGGAAGGTGAAGTTTGC  
TGTGCTGCAGACGGTGAGTTCCCTTTGGTGCCCCCACCCTCCTGCTGTGCGCACCA  
TGAGATGTCAGGAGCCCCGCAGATG

>1323

TGAACTACATCGGCCAATTCTTGCTGGATATGAGCCCCAGCGTTCATGGACCCCCTA  
CTTCCTAAACTGTGAGTGTCCCTCAGGGCAGAGGTGGGTGGAAACCCCTGAGGGACT  
GTGAAAAGTAATGCCCTTCCTCC

>1324

GCAGTCTGGAGATGATCGACCACATTGTGGGAAACCAGCCTGATCAGGAGATGGTGTC  
CGCCTCCGAATGGTGAGACCTTGGCCCTCTCCCTCTGCGTGAAGATGACGGGTCTCA  
CGGTGGACTGGCCCACTCCCTGGT

>1325

CAACTATGAAGAGTCCATCAAGATGCCATCAATGAGCCAGCGCCTGGCAAGAAGAAG  
TCCCAGATCCAGGTGAGGCCGCCCTGGCTGGGGGAGAGGGGAGCAGGGAAGAGGT  
CTGGGGGCTCTTGTAGGGTCAGGGAT

>1326

ATATGTGGACTATAACGGGGGCGCTGGGGTCCAGCACATCGCTCTCAAGACCGAAGAC  
ATCATCACAGCGGTTAGAACCCCTTCCTGTCCGAATTCCTCTCTCATTGAGCCAG  
GGACGGTCTCTGCAAAATTGAGA

>1327

CTACAAACAACTGCGGGAGAAGCTGAAGACGGCCAAGATCAAGGTGAAGGAGAACA  
TTGATGCCCTGGAGGTGAGGCCAGGCAGGATCCGCAGCCTTGTGGGGGGAGTATGA  
GCTCTGCATTGCATCTTTTCAGAAATA

>1328

GATCTTCACCAAACCGGTGCAGGACCGGCCACGCTCTTCCTGGAAGTCATCCAGCGC  
CACAACCACCAGGTACTGCTTGTCCCCGGCAGGCCCGAGGGGACAGGCAGCTAGCAC  
ACTCGGTTTTCTGGGTCTTGGCTC

>1329

TGGCTGGAGCCCCCTCAGTGTGCAGGCTTAGAGGGACTAGGCTGGGTGTGGAGCTGC  
AGCGTATCCACAGGTAAAGCAGCTCCCTGGCTGCTCTGATGCCAGGGACGGCGGGAG  
AGGCTCCCCTGGGCTGGGGGGACAGG

>1330

GCTACTCCTCTGCATTGGAGCCCTCCTCGGGCACAGCAGCTGCCAGAACCCTGCCAGC

CCCCCGGAGGAGGTCAGTAGGCAGGCGGGGAGGGCGTGGTCAGCATTCCCCGCCCCT  
CCTTGGCAGGCAGCACGGGAAACAG

>1331

ATGAGCCCCACGACCAACGTGCTCCTGTCTCCTCTCAGTGTGGCCACGGCCCTCTCGG  
CCCTCTCGCTGGGTGAGTGCTCAGATGCAGGAAGCCCCAGGCAGACCTGGAGAGGCC  
CCCTGTGGCCTCTGCGTAAACGTGG

>1332

GAGCTCCTTGACACGGTCACTGCCCCCAGAAGAACCTCAAGAGTGCCTCCCGGATC  
GTCTTTGAGAAGAGTGAGTCGCCTTTGCAGCCCAAGTTGCCTGAGGCATGTGGGCTCC  
ATGCTGCAGGCTGGGGGGGTCTTTT

>1333

CTCGCCAGGTCCACAAAGGAAATTCCCGATGAGATCAGCATTCTCCTTCTCGGTGTGG  
CGCACTTCAAGGGTGAGCGGTCTCCAATTCTTTTTCATTTATTTTACTGTATTTTAACT  
AATTAATTAATTCGATGGAGTC

>1334

GAGGGTCCCCATGATGTTCGGACCCTAAGGCTGTTTTACGCTATGGCTTGGATTTCAGATC  
TCAGCTGCAAGGTCTGTGGGGATAGGGGCAGGGTGGGGGGTGGATGGAGGGAGAGGA  
TAGAGAAGCAAAACAGGGTAGTGG

>1335

GCGGTCTCACTGTCCCCAAGCTGAAGCTGAGTTACGAAGGCGAAGTCACCAAGTCC  
CTGCAGGAGATGAGTATGTCTGAAGACCCTTTCGCTCTTGGTGGGTGGATGGGGTGGG  
GCAGGGTCTTTGGGCCTTCCACTGT

>1336

CCCTGTGCCTCCCTCTACAGCCCTCAGGGAGCTCATTGAGGAGCTGGTCAACATCACC  
CAGAACCAGAAGGTGAGTGTCGGCTAGCCAGGGTCCTAGCTATGAGGGCTCCAGGGT  
GGGTGATTCCCAAGATGAGGTCATG

>1337

AGGCTGCAGTGCCATCGAGAAGACCCAGAGGATGCTGAGCGGATTCTGCCCCGCACAA  
GGTCTCAGCTGGGGTAAGGCATCCCCACCCTCTCACACCCACCCTGCACCCCCCTCCT  
GCCAACCCTGGGCTCGCTGAAGGGA

>1338

GTCCTGGTGGCCGTGGCTACAGCCCTGGTGTCTGCCTCCTCCCCCTGCCCCCAGGCCT  
GGGGCCCCCAGGTGAGAAGAACCCTGCTCTACAACCTCCCAACTCTGACTTGTGACT  
TGCCACCCTCACTGTGGCCCCCTT

>1339

GATGAGGGCACCTACATCTGCCAGACCCTGGATGGTGCATTGGGGGCACAGTGACCC  
TGCAGCTGGGCTGTGAGTTGGGGAGGGTGGCACTGATGACACATAGGGATCCTGAGG  
GAGTATGGGACCTAAGTAAGCCCTC

>1340

AGAACTTCTCTTGCACTTGGAGTCCCAGCCAGATCAGCGGTTTACCCACCCGCTACCT  
CACCTCCTACAGGTGTGTGTGTGATTGGGTGTGGATGCCTACACATTTGGGTATGCTGG  
TGCAATGTGGGTGTGGGAGGCAG

>1341

ATTAATGTGACTGAGGTGAACCCACTGGGTGCCAGCACACGCCTGCTGGATGTGAGCT

TGCAGAGCATCTGTGAGTACCCACCCCAGACCTCCCCCAGACCCCCATCACAGAGACC  
CCAAATGGACTCAGATCTCTCCAC

>1342

GTGCCAGCCCCACTTCCTGCTCAAGTTCCGTTTGCAGTACCGTCCGGCGCAGCATCCA  
GCCTGGTCCACGGTGAGGCCTGGAGTGCGTCCCAACCCACGGCTGTGGTCCTGTCTCT  
GATTTACGATCCTGGGTGTTCTG

>1343

GCCCCGGGACTTTTCTAGATGCTGGCACCTGGAGCACCTGGAGCCCGGAGGCCTGGGGA  
ACTCCGAGCACTGGTGAGAGACAAAGCCAAAGAAAAGGGCAGAGGCCCCATCCCAA  
AGCATCTATCAGCTGAACCAGTTCCAA

>1344

GAGGTGGAGCCTCAGGTGGACAGCCCTGCTCCTCCAAGGCCCTCCCTCCAACCACAC  
CCTCGGCTACTTGGTGAGCTTGGGCAGATGGGCAAGACTTGTAAGGACTGAAAACC  
CCAGAGAAAAGGGGACACCGAGCTTG

>1345

CGGGGTGGGAAGGATGGATCCCCAAAGCCTGGGTTCCTTGGCCTCAGTGATTCCAGTGG  
ACAGGCGTCCAGGTGAGTAGGACATCCAGAAGATTTGGACTTGGAGATGTTTGCCCCT  
ATTTTGAGTGTCCAGATTAAGAGC

>1346

GTCCTGGGGCCTGGGCAGCTGGGGGCTGTGGCCATTCTGCTCTATCTTGGATTACTCCG  
GTCGGGGACAGGTAAGTGAGGACGTGGGGGCAGGGTGGGGACAATGCACTGGAGGG  
AGCCGGCGTGATCATTTTCTGGGGT

>1347

GCGTCCATGTGTGTGGTGGCTCTCTCGTGTCTGAGCAGTGGGTGCTGTCAGCTGCTCA  
CTGCTTCCCCAGGTACCAAATGGTGAAAGTCAAAAGTGGGCTGGAGGTCAAAGTTAAT  
GGGTCAATCCAGGTCAGAGGTTGG

>1348

GCAGCCAACGCCTCCTTCCCCAACGGCCTCCACTGCACTGTCACTGGCTGGGGTCATG  
TGGCCCCCTCAGGTGAGGTGGGACGTGGGTGCCTAGAGGTGTGGAGGGGACCTGAC  
TTGGGGAGGGGCCCAGGGTAAGCCT

>1349

GGAGCCGCACTTTGTCCAAGAGGACATGGTGTGTGCTGGCTATGTGGAGGGGGGCAA  
GGACGCCTGCCAGGTAAGCACAGGCCCGGGGGCAGATGACCAGTGCAACTTCGAAA  
GGAGGCCTGGCCCGGTCCTGATGGCT

>1350

GCGCCAGCAAGTTCGCGCTCGAAGGCTTATGCGAGAGTCTGGCGGTTCTGCTGCTGCC  
CTTTGGGGTCCAGTGAGTCAACACCCCCGTTCCCCGAACCCTCTTAACCTGACCTAG  
AGACGCCGAGCACCTGTCCTGCG

>1351

CTACCAATACCTCGCCACAGCAAGCAAGTCTTTCGCGAGGCGGCGCAGAACCCCTGA  
GGAGGTGGCGGAGGTGAGCGCCGGGCTGGACTCCAGGAGTGGGGGCGGTGCGTCCT  
CCGGCGCGCAGCGGTGGCCACAGCTCT

>1352

CAGCCTCCAGCCAGAAGGATGGGGTGGCTCCCACTCCTGCTGCTTCTGACTCAATGCT

TAGGGGTCCCTGGTAAGTGCCCCAACCCCTGATCCCCATCTGCCTTCAGGAGGGGGTT  
GGCCCCATTCTCCTATTCTAGGAT

>1353

GGCCTTGGCAGGAGGATGTGGCAGATGCTGAAGAGTGTGCTGGTCGCTGTGGGGCCCTT  
AATGGACTGCCGGTGAGTGGCCACTGGGCTAGATAAGACTGGGGGCAGGGAAGCCTG  
GGCTGTGGCGTTACCCTGTGCCTTC

>1354

GCACCATGGCCACGACCGTGGGTGGCCTGCCCTGCCAGGCTTGGAGCCACAAGTTCC  
CGAATGATCACAAGTGAGACAAACACCTTCCCTCCGTCCCGGCCTGGGGCTTCCCCCA  
GCACACACTATAGTGATGCTCTGGG

>1355

GGTCCTTGGTGCTACACAACAGACCCTGCTGTGCGCTTCCAGAGCTGCGGCATCAAAT  
CCTGCCGGGAGGGTAAGCGGCGCCGGGTCAAGCTGGGAGAGTGGAGACAAGCCAC  
GTCCATCCACGAACCCACTGGCTCTT

>1356

CGGAGTCAGGGCGCGAGTGCCAGCGCTGGGATCTTCAGCACCCGCACCAGCACCCCT  
TCGAGCCGGGCAAGTACGCGTAGGCGGTATCGGCGTCTTGGGGGCCGGGCTAGGGAA  
GGTCCAGGACTCCAGGGGCAGGGCTC

>1357

TCCGAGCGGCCATGGTGCTACACTACGGATCCGCAGATCGAGCGAGAGTTCTGTGACC  
TCCCCCGTGCGGTAGGCGGCGGGGACCAGGCCTGGGAGGGTACCTGGGAACCTTGG  
GGAGGGGCGTGGCTTGGCCGGGGAG

>1358

TACCTTGCCAGCGTTGGGACGCGCAAATCCCTCATCAGCACCGATTACGCCAGAAAA  
ATACGCGTGCAAGTGAGGTGGGGGGGGGGGGCGGGCGTTGGGACGTGCTGCTGCGGG  
TGAGACGGGAGGAAGGTAGTCACGG

>1359

CTGCGGCCCCGGCATGCGCGCGGCCTTTTGCTACCAGATCCGGCGTTGTACAGACGACG  
TGCGGCCCCAGGGTGAGGCCCAAGCTTGGGGGCTACAGAGCCGGGCTGGAAGCTGGA  
ACCGGAGGCCGGGGCGAGGTCTCGG

>1360

GCACGGTCAGCAAGACCCGCAAGGGTGTCCAGTGCCAGCGCTGGTCCGCTGAGACGC  
CGCACAAGCCGCAGTGAGTCCCTGGTGCTCCCGGCCCCGCCAGGGCCCTAACCCCTGG  
GGCGGCATGCTTTGGTGTCTGGGACC

>1361

AGCCATGGGCCCTGGTGCTACACGATGGACCCAAGGACCCCATTCGACTACTGTGCCC  
TGCGACGCTGCGGTGAGCACTAGTGACGCTTCCCCCATGACCCTGCCTCAGCCCCAC  
CCAAAGGCTGGCTCCCTTAACCC

>1362

GGCGTTCCAAGCTGCGCGTGGTTGGGGGCCATCCGGGCAACTCACCCCTGGACAGTCA  
GCTTGCGGAATCGGTGAGGCACAACCTGCCTGTCTCCACAGAGAGGAGCTGAGGTTG  
TGTCTCTGTGGTTATCCACTGGGGC

>1363

AGCATTTCTGCGGGGGGTCTCTAGTGAAGGAGCAGTGGATACTGACTGCCCGGCAGTG

CTTCTCCTCCTGGTGAGCCTCCCTTGTGTTTGGGGACCCAGTCTCATCCCACCTTCCCC  
CTTCCCCAGGCAAGCTAACAAGT

>1364

AGCGGGTCCCAGTAGCCAAGATGGTGTGTGGGCCCTCAGGCTCCCAGCTTGTCTGCT  
CAAGCTGGAGAGGTATGTGGACAACCTGGGAGGGTGTGAGGTGGGGCTGGGCCTTGT  
GGCCTCAGACCCTGAGTGCCCCCAT

>1365

CTGCCCCCTGAATGGTATGTGGTGCCTCCAGGGACCAAGTGTGAGATTGCAGGCTGGG  
GTGAGACCAAAGGTAAGAGCACAGTGCACAGGACTGCTGGTGGCCAGGAGGCCAGC  
CCTGGATCTTCCTGCAGGACCCTCTC

>1366

GCACCGAGGACGTGTGCGGGAGAGTGAGATGTGCACTGAGGGACTGTTGGCCCCTGT  
GGGGGCCTGTGAGGTTGGTGGCAGGGCCTGGGCAGCCCTGGAAGTATGGGGGGCTAG  
AAATGAAC TATTTTATCATGAAGCAG

>1367

TGCCTGCGGACAGGCCCCCAGGGCTAGCGGCTTTGTGGAGGGAACACTGGGTATCCTC  
TCCACAGTCCAGGTAGGTGGGACCCCCACTCCTGGCTCTCAGCCTTTAGGAACAGGAG  
CTTCTCTACTTGGAGCTTCTAGAC

>1368

CTCCCTGCCAGTGAGTTTCGCTGCCTCACCCCGGAGGACGCTGTCAGCGCCTTTGAGA  
TCGAGCGTGAAGGTGAGTGGCCCCGCACAGGGTCAGAGGGATGCTCCACTCTGGTCC  
AGTTATCCTGTGGGGAGGAGACCCT

>1369

CTGGTTCGAGGAGGGCTGCCTTGTGGCCTTCATCATCGGCTCGCTCTGGGACAAGGAG  
AGACTCATGCAGGTGAGGACAGGCCTGCGACGCCAGCTCCAGGGAGGCCTCTGAAG  
ACAGAGGTCAGCCAGATGGCGGGGA

>1370

AAATTCGTCATTCGAAACATAGTGGAGGCCGAGCAGTCAGGGACATTTCTGAAGCGA  
GCGTCTTCGATGGTAAGTGGGTACCGGCGCGAACTGTGTGAGGATCCAGTATCTTAA  
AGCCTTCGCCCAACTTCGCCCTTT

>1371

CAAAGTAGTCAGGAATCGATCTCGTGAAGCCCGCAAGGACCGAACACCCCCACCCCG  
ATTTAGACCTGCGGTGAGTATTTTAAAAGGAGAATGGAAGCCAGAGGAGTGATGGTTA  
AAATTTATCCTGGAGGGTCAGGGT

>1372

AGGTTCACTGCAACCGTTCAGAGGTCCCCAGGAGCTGCTGCTGGCGAGCCCGCTACTG  
CAGGGACCTATGGTGAGCAAGGCTACCTGGTGAGGGGAGACAGGCAGAGGGGGTCTA  
GGAGCCTCCTTGGGGGGAAGAAGCT

>1373

TTCCAGCAAGTTTGTTC AAGATTGGCTGTCAAGAATCATGGACTGTTATTATATGCCTTG  
TTTTCTGTCAGTGAGTAGACACCTCTTCCTTCCCCCTCTCCGGAATTC ACTCTGCCCTC  
ACCACCCCTGCTCGCCGGCTG

>1374

AGCACTGGTCTTGAGTATCCTGAGCGCCCGGCCAGCCGGGCCAACACCGTGAGGAGC

TTCCACCACGAAGGTCAGTCTCTTCCCCAGTCTGCGTGGGGGAGGGCTGGTGGGACT  
GGCTAGAGGGGCAGTGAAAGCCCTG

>1375

GGAACCCACTTAGGTGGCACCAATCTTGACTTCCAGATGGAACAGTACATCTATAAAA  
GGAAAAGTGATGGTTAGTCATTGCTTTAATTTTTTGTACTCCAGCTGTAAGTACAAATT  
TTGAGCTTGCTATTCTCGTGGT

>1376

AGCTCGTGCAATTGTTGCCATTGAAAACCCCTGCTGATGTCAGTGTTATATCCTCCAGGA  
ATACTGGCCAGGTTTGTGGAACAGTGGTTAGTTTTTATATTATAGAAATAAAGCCTTACA  
GACATTGTGAGACATATAGAA

>1377

TACCATTGCGCTGTGTAACACAGATTCTCCTCTGCGCTATGTGGACATTGCCATCCCATG  
CAACAACAAGGTAATGATTTTAGGATCTAGAGTTTGTGAATGCGTGCTCTAGAAAAAA  
CATTCTGTGCACATTGTTAGA

>1378

TGGCACCATTTCCTGTGAACACCCATGGGAGGTCATGCCTGATCTGTACTTCTACAGAG  
ATCCTGAAGAGGTAAGCTTCTCAAAGGCTTGTGGTTACATAAGCAAATTGGACGACT  
TGGACTGCTGTCTAGGAAGCAAA

>1379

CAGCCTGAGGTTGCAGACTGGTCTGAAGGTGTACAGGTGCCCTCTGTGCCTATTCAGC  
AATTCCTACTGGTATGTATCAGGATAGAGGTGAATCAAGCTGATATTTGCAACTTCTC  
AGTTTTATTCTAACTTTAATGA

>1380

CATGGAGCTGTTCTGCTGGTCAGGGGGCTGGGGGCTGCCGTCAGTGGACCTGGACAG  
CCTGGCCGTGCTGGTGAGGGGTGGCGCCGGCGCCCTCTGCTGTGCCCTGATGACTGGG  
GAGGGGGCCGAAGTAGCCAAGCATC

>1381

ACCTATGCCAGATTTACTGGTGCTCCACTGAAGGTACACAAGATCAGCAACCCCTGGC  
AGAGCCCTTCAGGTACCCAGTATCCCTTGGGGGTAAGGAAGGGTGTGTACAAGGGGA  
GAAGCAAGAAATAGGCAGGAATGTG

>1382

TGCCCTTCGGACCAGTCATGGAGAGGTCATCTCAGTTCCACACAAGATCATCACCCAC  
CTTCGAAAAGAGGTAGGTGACTTGGATAGAGGGGGCTGCCAGTGAGAGAAGTTCAGT  
CAATTCTATACAATACACATTTATT

>1383

GTCAGCTCGGCAAGGGGCAGACACCCTGGCCTTCATGTCTCTCCTGGAGGAGAAGTT  
GCTCCCGGTGCTGGTGAGTGTGCCCAGACCTCCCAGCATCCATGGCCAGCCGGGGAG  
GGTTCGGGAACACACAGACCCACACA

>1384

GTACATGGAACGGCTACAGCTGCTGACTGGGGAGCACAGGCCTGAGGACGAGGAAGA  
GCTGGAGAAGGAGGTAGCTCTGAGACCGGGGGCTATTGTATGAGATGAGCCCCAAGGA  
TGCTGGCCAGGAATGGGAGTGCTTA

>1385

GAGAGGCTCGGGAGTGTCTGACCCTGCTCTCTCAGCGCCTGGGCTCTCAAAGTTCTT

CTTTGGAGATGCGTGAGTCTGACTCCAAGAGGGTAATGGGTGGCTTGGAAGAAGATAC  
AGGTTTCAGATGGAGCAGCTGGAGC

>1386

CTGCGTGGGCTGCACAACCTCTGTGCCTATTGTACCCACATTCTCAGTCTCTACTTCCC  
CTGGGATGGAGGTAAGGGGCAGATGGGAGGGGCAGCCCTGGGGAGAGTGGGCAGGG  
ATCCAAGAAGTAGTTCTCCTAACAC

>1387

GGACCATCCCAGACAGTGACATCTCTGCTTCCAGCTCCTGGTCAGATTCCACTGCCGC  
CCGCCACAGCAGGTACTTGGCACACCTGGCACACTTGTAGCTGCCCCGAGAGGAGCT  
CCTGGGACCTCTACTTCCCCCTCAA

>1388

TTCTACCCCCGGGCTGACCGGGTCATGAGTGTCTGTCTGCGGGTAGAGCTCTATGGCTG  
CCTCTGGAGGGGTGAGTGGCTCAGCTTCCTGGGAATCTGTTTCCTGAGCAGGGGACTG  
GAGGGTGGGGAGTGTGGCGAATG

>1389

CAGCTTCTCCAGTGGCTATGTGGAGATGGAGTTTGAGTTTGACCGGCTGAGGGCCTTC  
CAGGCTATGCAGGTGAGTGAGTCCGGCTCTCGAGGAGGGCTCTGAAGCCATGCAGGG  
TGCCGTTGGGGTGCCCCCACCCTC

>1390

CGCTTTCTGCAGTGCCGCTTCCTCTTTGCGGGGCCCTGGTTACTCTTCAGCGAAATCTC  
CTTCATCTCTGGTAAGCCCTGGAGTAGCCCAGTCTCCAGTCCCTGAAATTGACAACTG  
AGTTCATTCTAACCCTGCAGTG

>1391

CTGGGAGGCACCTTCCCGCCAGCCCCCTGGTGGCCGCCTGGCCACCTCCCACCAACT  
TCAGCAGCTTGGGTGAGCAATCTTGGGTGGGCGTGTGGACCCTCTGCACCCTTCTCCC  
TGGGCCTCCCCCTCGGCTAGGGTG

>1392

CATCCTGCTCCTGCTGCTCATCATTGCCCTCATGCTCTGGCGGCTGCACTGGCGCAGGC  
TCCTCAGCAAGGTGGGCACAGCCGTGGCATGTGGAGTGGCGGGGGGAGGCCAGGCCC  
CAGCACGAGCCAGCGTCCAGTGGG

>1393

CCCCCGTACCAGGAGCCCCGGCCTCGTGGGAATCCGCCCCACTCCGCTCCCTGTGTCC  
CCAATGGCTCTGGTAAGACCTGCCTTGTTCCAGTCGCACCTCTGTCTCTCTGCTGTTT  
TCTTATTGTATCCCTTTCCATT

>1394

ACTTACGCCCCTCCCCCTCGAGGCCCGGGCCCCCCCCACACCCGCCTGGGCCAAACCCA  
CCAACACCCAGGGTAAGCCCCCTCTGCCCCTGGGCTCCGCCAGGCTCCCCATACCTCTA  
CTGGGGCAGGGAAAAGCCCTCACA

>1395

CCCCAGAGTGGATTTCCTCGATCTCGACTCCGCTTCAAGGAGAAGCTTGGCGAGGGC  
CAGTTTGGGGAGGTAAGGAGGGTGCCTACCCAGTGTCTGGCCCTATTGTGTGCTCTGA  
TGCCATGCCTGCGCATCCCCCTAG

>1396

ATGTGCGTAAGGGACACCCTTTGCTGGTAGCTGTCAAGATCTTACGGCCAGATGCCAC

CAAGAATGCCAGGTGAGGACCAGGGATGGCATCTGGAAGAAGGGAGGGGAGGCCGC  
GAAGAGTGGCGAGCCATCTAGAGAGA

>1397

ACCAGCTGGAGGACAAGGCAGCCGAGGGGGCCCCTGGGGACGGGCAGGCTGCGCAG  
GGGCCCACCATCAGGTACCTGTTTACCCAGGCTGGGCCATGCTCAGAATTCCCCCAGG  
GGATCTCCTCCTCTCCCCTCGCTTCA

>1398

GGACTATTACCGTGTGCAGGGCCGGGCAGTGCTGCCCATCCGCTGGATGGCCTGGGAG  
TGCATCCTCATGGTGAGCAGCCCGAGGACAGCCAGGTTGGAGCAGGGCAGGTGGGAG  
AACACTGGCCGCCACTCACAGCCCT

>1399

TGGCATCAACCAGCGGTCCTCGGATGCTAACCTCTACCGCCTCCTGGACCTGGACCCC  
AGGCCCACGATGGTGAGCTTTGGGGGACATTCTGCTCTGCTCTGGCTGGGCTTGGCAC  
GTGTTGTTCTTCTGCTCCTGCTG

>1400

AGTGAAGGAGACAGTGTGCCCCAGGACGACACAGCAGTCACCAGAGGATTGTGACTT  
CAAGAAGGACGGGGTGAGGCTGGGGGCTGGGGGTGTTGGTGGGTGCCTCCCAAGGA  
GCTGAACAGGGGGCACCTGGGGAATAT

>1401

GGTGAAGCGGTGTATGGGGACAGTGACCCTCAACCAGGCCAGGGGCTCCTTTGACATC  
AGTTGTGATAAGGTGAGTGGGCTGTTCTGGGATGCAGGGGCTGATGGGGGCATAGAGT  
GTGGACCATCCAATGGGTCAATTA

>1402

TCTCTGCATGGATACTTCGTCTTCGGGCCCACAGGATGCAATTTGGAGGGCTTCTTTGC  
CACCCTGGGCGGTATGAGCCGGGTGTGGGTGGGGTGTGCAGGAGCCCGGGAGCATGG  
AGGGGTCTGGGAGAGTCCCGGGCT

>1403

TCATGGGCGTTGCCTTCACCTGGGTCATGGCGCTGGCCTGCGCCGCACCCCCACTCGC  
CGGCTGGTCCAGGTAATGGCACTGAGCAGAAGGGAAGAAGCTCCGGGGGCTCTTTGT  
AGGGTCCTCCAGTCAGGACTCAAAC

>1404

GGTCCACTTCACCATCCCCATGATTATCATCTTTTTCTGCTATGGGCAGCTCGTCTTCAC  
CGTCAAGGAGGTACGGGCCGGGGGTGGGCGGCCTCACGGCTCTGAGGGTCCAGCCC  
CCAGCATGCATCTGCGGCTCCTG

>1405

CATCCCAGCGTTCTTTGCCAAGAGCGCCGCCATCTACAACCCTGTCATCTATATCATGAT  
GAACAAGCAGGTGCCTACTGCGGGTGGGAGGGGCCCCAGTGCCCCAGGCCACAGGCGC  
TGCCTGCCAAGGACAAGCTACTC

>1406

ACAGGTTTTATTTTTTCTTGTTTTTTTGAATCCCTAACCTGCCCACACAACCT  
CGGGATATAGGTAAGAAATTTACTTGTATATCAGCTAAAGCATGACCAGTTAGGATAATT  
TCTATTTTTAAAATTTTGTT

>1407

GAAAGACATGGTAGAATACAAAGACAGATGTATGGCTGACAAGACGCTCCCAGAGTGT



TCAAAATTACCTGTAAGTAAATTGCTTGTGTTTCTTTTCCTTTTATCTTATGTCTTTCTTT  
CTCTTTCTTTCTTTCTTTCTT

>1408

CTTTCCTACCCTGGATCCCGAAGAGAAATGCCAGGCTTATGAAAGTAACAGAGAATC  
CCTTTTAAATCAGTAAGTTTAATCTTAGTAAAAAATGATCCAGTTGAAGAATTAGTCTTA  
GGCTGAATCTAATATCTATCTC

>1409

TGTTCATTTTGAGGAGGTGGCCAAATCATGTTGTGAAGAACAAAACAAAGTCAACTGC  
CTTCAAACAAGGGTGGGTATAGCATTTGTTCCATGAAGAGGATAAGAAATCACTCAATA  
CCACAGATCCAGACCCTGACTTA

>1410

CATTTTCTTCTTATCAAAAACATGTCTGTGGGGCACTTTTGAAATTTGGAACCAAAGTT  
GTACACTTTATGTGAGTTTATACTATATGTCTTGTCTCTGCTTGCATTTCTTGTCTGTG  
TCCCATTTTTGTAAATGGT

>1411

TGTAGAAGATGTTTCTTCCAACATGATGGATGCTGTGAAGGGGATGTTGTGCAGTGCA  
TCCGTGACACGGTGAATATTCTCTAAAACCAAGTTAAAATAGTGATTTTTGGCAATTATC  
ATTTTTTTATTCTCAAGTTGC

>1412

AAGGAAAATTTACTGACAGTGAAAATGTGTGTCAAGAACGAGATGCTGACCCAGACA  
CCTTCTTTGCGAAGTAATATACTCTTTATTGAATTTATAAGGGAAACAGAAAGAACT  
TGTAAGATTTGACTTTTGTGCTA

>1413

TCAAATATACAAAGATCTCCTGAGAAATTGCTGCAACACAGAAAACCTCCAGGTTGT  
TACCGTTACGCGGTAGGTTCCATTGTTGTAGGTTGAGAAAATCAAAAAGAACAATA  
GAAAACACTTAAAAATTGATATCA

>1414

AAAGCCTCAAGATGGTACAACAAGAATGTAAACATTTCCAGAATTTGGGGAAGGATGG  
TTTGAAATACCAGTATGTTGTTTGCACAAGTGGGCTAACACTTGCCACTAGAATTGAAT  
ACATAATCCCTCGAAGCGTAAAA

>1415

CGAGAAAATGGTGACAGCTTTCCTACTTGCTGTACGCTAAGTGAAGAGTTTGCCTGT  
GTTGATAATTTGGTGAGCATGGCCTGTGTACCAGACTACTCTTTTTTTTTTTTTTAAAA  
AAAAGAATATTTGCACTCATTG

>1416

AAGATTTATTTACCTTTCACGCAGACATGTGTCAATCTCAGAATGAGGAGCTTCAGAGG  
AAGACAGACAGGTACAAATAATCTCTTCCATTCTTCTTTTCTTTGGTTTGAAGACACA  
CCATGTATTAGTGAGAAGGTTT

>1417

TACAAATTTTCGCAAATGTAGTGGATAAGTGCTGCAAAGCAGAGAGTCCTGAAGTCTGC  
TTTAATGAAGAGGTAGTTTATTTCTTTTCTACTGAAATTCAACTGGTTTTCTGGTCAA  
ATAAAATAAAACAGAACCCTGC

>1418

ACAACCACAGTTGCAGTTACTCCACCTACGGCATAAAAACACCAAGGAAATATCAAAG

AACACAACGCAGGTAAATTAACAGTATATAAAATGAGTAATTCCGACAAGAAGCATGG  
ATTTATGAATACAACCATAAATTC

>1419

GTGGATTCCCAGGGACTGTCGGAGGTGTGGACTCTGCCTGCCTACCTGGTCTGGGAAG  
ATGTTCTACCATGTGAGCAGGGCTCAGGGTGGCGGCAAGGGCTGGGTGGAAAGGAAG  
AGCAAGGCCAGGCGCCGGCGCGAGA

>1420

TCGGCCCCAACTTGCTCAACACGGTGAAGCAGAAGCTCTTCACCGAGGTGGAGGGGA  
CCTGCACAGGGAAGTGAGTGTGAGCTCACCGCACCGCCAGATCGTTCGATGCGCAC  
ACGGGGCGCTATACCTGCAACCCCTC

>1421

GTACAAGGCCATTGTTTTCCGGCCATTTAAAGGGGAGGTCGTGGATGCTGTTGTCACTC  
AGGTCAACAAGGTGAGACCATACATAGGGGAGGCAGTGGGGTAGTCTCTCGGAAGAT  
CTGGGTTGGGTTCTGGCTCCACTT

>1422

TATTGTGATTCAGCAGGACGATGAGATCCGCTTAAAGATTGTGGGGACCCGTGTGGAC  
AAGAATGACATTGTGATCTTTTCCCCACCTCTCTACCTATACCAGGTTGAGCTGAGAAC  
TGTCGATTTCTTTTTTCTTTTTT

>1423

GCACTGGGGCCCCTGCAGAGCTTCCAGGCCCCGGCCTGATGACCTGCTCATCAGCACCT  
ACCCCAAGTCCGGTAAGTGAGGAGGGCCACCCACCCTCTCCCAGGTGGCAGTCCCCA  
CCTTGGCCAGCGAGGTCGTGCCCTC

>1424

AAGTGTACCGAGCTCCCATCTTCATGCGGGTGCCCTTCCTTGAGTTCAAAGCCCCAG  
GGATTCCCTCAGGTGTGTGAGTGTGTCTGGGTGCAAGGGGAGTGGAGGAAGACAGG  
GCTGGGGCTTCAGCTCACCAGACCT

>1425

CCCACGACTCCTGAAGACACACCTGCCCCTGGCTCTGCTCCCCCAGACTCTGTTGGAT  
CAGAAGGTCAAGGTGAGGCAGGGCACAGTGTTCACATCCATAATCCCAGCACTTTGG  
GAGGCTGAGGCAGGCAGATCACCT

>1426

CACATGGCCAAGGTGCACCCTGAGCCTGGGACCTGGGACAGCTTCCTGGAGAAGTTC  
ATGGTCGGAGAAGGTGGGTTTGATGGGAGGAAGGAAAGTGTGGAGCCGAGGGGTGGT  
GGCTACAACGCACAGCAACCCTGTGT

>1427

CGTGCAGGAGTGGTGGGAGCTGAGCCGCACCCACCCTGTTCTCTACCTCTTCTATGAA  
GACATGAAGGAGGTGAGACCACCTGTGAAGCTTCCCTCCATGTGACACCTGGGGGCC  
GGCACCTCACAGGGACCCACCAGGG

>1428

CCTATGACCAACTACACCACCGTCCCCCAGGAGTTCATGGACCACAGCATCTCCCCCTT  
CATGAGGAAAGGTGGGTGCTGGCCAGTACGGGGGTTTGGGGCGGGTGGGAGCAGCAG  
CTGCAGCCTCCCCATAGGCACTCG

>1429

AGCTGTAACGGATACTTCGTCTTCGGTCGCCATGTTTGTGCTTTGGAGGGCTTCCTGGG

CACTGTAGCAGGTACTGCAGGGGAAAAAGGGGTAGGGGAAGGCAAAGGTTGCTACT  
CCGCTGGAGGGGGTTCCTAAAGAG

>1430

TGACGGTGGTCCTGGCTACCTGGACCATTGGTATTGGCGTCTCCATCCCACCCTTCTTT  
GGCTGGAGCCGGTGAGAGTGCAGGGCAGTGGTGCTGAGTTAACTAGGAGCTCAGGTT  
GATGTGGGTGGAAAGAGAGCTTGG

>1431

CTTCTGCTTCATTGTGCCTCTCTCCCTCATCTGCTTCTCCTACACTCAGCTGCTGAGGGC  
CCTGAAAGCTGTGAGTGGCATTGATAGTCAGGGAAGAAGGGGTTCGGGGCTCCACAT  
GAGAAGGAAGAGTGCTCTGAAA

>1432

CATTCCTTCATTCTTCTCCAAGAGTGCTTGCATCTACAATCCCATCATCTACTGCTTCAT  
GAATAAGCAGGTAAAGCTCTTTATTCACATTCTATGGTCCAGAAGACCCTGGTTCTTT  
TCTCACCATTGACTTTTAACT

>1433

GTGGACGCTTTCCTGGGCACCTGGAAGCTAGTGGACAGCAAGAATTCGATGACTACA  
TGAAGTCACTCGGTGAGCAAGCCGCGGGGCTCAGGATGTTGGCTTGGGGACTGGCTG  
GTGGCGTGCCTAGCCCCACGCAGCA

>1434

GAACACAGAGATCAGCTTTAAGTTGGGGGTGGAGTTCGATGAGACAACAGCAGATGA  
CAGGAAGGTCAAGGTAAAGTCAGGGAAACAGGGGTGGGGAATGGAGAGTGCTGAGAC  
TCTAAAAGAGAATAGGCTGGTAGTCTT

>1435

TCACCTGCAGAAATGGGACGGGCAAGAGACCACACTTGTGCGGGAGCTAATTGATGG  
AAAACTCATCCTGGTAAGATGGGCAACTTTGGAGCTATATCTGATTGGTTATTACTACTG  
CTCTTTCAGCCAAGCCTGTTCTA

>1436

GGGCCGAGGGCTGCCGGTCCGGGCTCCGCTCAGCACCTCAACGGCGAGATCAGCGC  
CCTGACGGCCGAGGTGAGATCCAGATCCGACCACTAGATCATCCTTATACCGACGGGG  
AAACGGAGGCCAGAGAGGGCGTG

>1437

ACCGACGGTACCATGAAGGACGAGGTAGCTCTACTGGCTGCTGTCACCCTCCTGGGAG  
TCTTGCTGCAAGGTGGGCTGGTTCCTATCTAGGAAGAGGGTGGGCCTTAGATCCCTAC  
AGCTTGCCCTCTGCCCCCTAGGCC

>1438

GCAGGGCCTTCCGCGTGTGCGCCGCGCTCACCACGGCCACCCGAGTTCGAGCGCG  
TCTACCGAGCCAGTGAGGCGCGGGGAGGGCGCGGGGCGGGGAGCGAGCCCCAG  
GCGGGTCCGGGTGCGAGGACCATCCCCG

>1439

GTGAACTGCAGCGAGTACTTCCCGCTGTTCTCGCCACGCTCTGGGTGCGCGGCATCT  
TCTTTCATGAAGGTGCGGGTGTGGGGCAGGGGCGCACGCGCTGGACCCCCGGGACCC  
GCGCAGGGCGCTCACCAGGCCCGTG

>1440

TGTGCGGCCTGGTCTACCTGTTGCGCGCCTCCGCTACTTCCAGGGCTACGCGCGCTCC

GCGCAGCTCAGGTGAGGGCCGGGCGGGGAGCGGGGCGGGGCCGGGGAAAGATCGCG  
GGCGGGCGGGGCTCCTGGGGAGCGG

>1441

ATGGGGCTGGGCCGGGTCTGCTGTTTCTGGCCGTCGCCTTCCCTTTTGCACCCCCGGC  
AGCCGCCGCTGGTGAGTGGGGTTCCTGGCGGTCCCCGGCGGAGCGGGAGCGGCGGGG  
CGTTTCCGGGGGTCCGGGTGGGTT

>1442

ACCGAGGACTTGACAGAGAATGGGCAAGACCTCAGGAGGACCCTGACTCATATCAAG  
GACCAGAAAGGAGGTGAGAGTCGGCAGGGGCAAGAGTAATGGGAGGCCTTCTCCAG  
GAAAGTTGGAGACAGAGAGCAGGGACC

>1443

GCTATGCAGGCAGACTGCCTGCAGAACTACAGCGATATCTGAAATCCGGGGTGGCCA  
TCAGGAGAACAGGTACCGACCCTGGCCAGGGGCTCTACTGTTCCCGCAATTCTGCTAG  
AGTTGCCTCGCCTCCCAGCTCTGT

>1444

GGAGAGGAGCAGAGGTTACCTGCTACATGGAACACAGCGGGAATCACGGCACTCAC  
CCTGTGCCCTCTGGTGAGCCTGGGGTGACCCTGGAGAGGGTCAGGCCAGGGTAGGAA  
CAGCAGGGACGGCTGTGGCTCTCTGC

>1445

TGTTTTGTTATTATTATTATTCTCTGTGTCCCTTGTTGCAAGAAGAAAACATCAGCGGCA  
GAGGGTCCAGGTGAGAAAAGGGGACAGTTTCTGGAGATGGGAAAGCTCCTTTCTAGG  
CAGTAGGGTCTCCTCATTGCTCC

>1446

CAGCCGCGGTCCAGAGCGCGCGAGGTTGCGGGAGCTCCGCCAGGCTGCTGGTACCTG  
CGTCCGCCCCGGCGGTGAGTCCGCGCGGCCCGGCGGGACGCCCCGCCACCTGCGCG  
CACCGTCAGACCCGGCGGCCTCGGCT

>1447

ACGGCCATCCTCTCCAGAATGAAGATCTTCTTGCCAGTGCTGCTGGCTGCCCTTCTGGG  
TGTGGAGCGAGGTGAGGTGCCCTTGGGGACCCAGACCTTTGTCCAGCTGTGCCCTGC  
TCCACTCCCTCTCCACCCCTCTC

>1448

TGCCTGAAGCCGACCATCTGCTCCGACCAGGACAACACTACTGCGTGACTGTGTCTGCTA  
GTGCCGGCATTGGTGAGTGCCAGGCTCAGACCGTGCTTCCTCCCCTGGCCATCTCCCT  
AGCCCGGGCCGGGGCTCAGCAGA

>1449

GCTTTGCCTCTGAGGCCCTGACCCGGGGCTTGGCCAGCGCTGCCAAAGGAGGCCAC  
GGAGGAGCAGGAGGTGAGTGGGGAACGGGCGGATCCGGGGGCTCCCCTACCCTGCCC  
ACCTGTTACAGGCCCGCCGCCCCAG

>1450

CTATCTCCACTCGGGCCACCGCCCGCGCCCCGAGTTCCGTCCCTACCAACACCTCCGCA  
TCCGCACCAAGGTACGCGGGACGGGCGCGGGGCGGCACGGGGGTGCTGCGGGGGC  
GGGGGGGGGTGCTGCGGGGGCGGGG

>1451

CTGAAGGGGCTGAACCATACACTCCTTTTTTCTACAACCAGCTTGCATTTTTTCTGCCCA

CAATGAGCGGGGTAAGATTTTTATTTTGGCAAGGGGTATAATTTGGGTTCACCTGTGGC  
TACTTGAACACTACACTGCAGC

>1452

CAGCGACTATCTTTCTCCTCTGGGGACCACTTGGCTGAGGACCTGTGCGTGCAGGCTG  
CCAAGGCCAGCGGTGAGTGCATCCCTAGTGGATCGGGCCAGAGGGAAGGATGGGGCT  
GTGTGGGGCCAAGATTGGAAGCTGG

>1453

GCTGGTTCCCCCGAGCCACATCTTCTCCGTGGAGGATGCCAGCACCCAAGTCCTGCT  
GTACAGGATTTCGGTCAGCCCCCGCACAAGGCGGATAGGACAGTTAGTATCAGGGTCCT  
CTGCATCTCTGCTGGGACCCACAC

>1454

CTTCGGGCTACGCAAGGATTTGGCCAGTGCTATCCTTGACCTGCCAGTCCTGGAGCAC  
CTCTTTGCCCAGGTGGGGTTCTGCCTGGGGTTTGACCAGGGGGTTGGGGGTCCAATGG  
GCAACATGAGGACTGGCATGCAAT

>1455

CCGTGTTGGACCTGGCCCCGGATGGCGCGAGAGCAGGCCAGCGGCCGGGAGAGCTGC  
TGAAGACTGTCAGGTGAGAGCCACCAGGCTGTGGGGACGGGCTCTGTTTGGGAGTGA  
GCAACGTGGGCTCCATCGGGGGTTTG

>1456

GGCCACGACGGGCTGGGGCTGTTCCGCGTGGCTGGTGACGGCGGCATCGCCTGGACC  
CAGGGAGAACAGGGTGAGGACGGCTTCCCCCTGGCGGGGCCAAATGGGGGGGGGT  
TTGGGGAGGGGCCGGAGATTGTAGGG

>1457

GCCCCGCGCGTTGGCCCCGGCCGGAGAGCACCGCCTGGTCACTGTTACCAGGACAGAC  
AACCAGATTTTAGGTGGTGCAGGATTCCCCCTCCCCCTTCAGCCTTACCCCGAAGGGCG  
GGACCGGCACCCTCGGGTTTCACTG

>1458

TCCTGGCTCCTATGTTCTCCGCCGCAGCCCCAGGACTTTGACAGCTTCCTCCTCACTG  
TCTGTGTCCAGGTCGGTCTACTGCTAGGGTGGGTAGTGGAGGGCTGCCTGGACAAGAG  
GTTACCTCTGAATTGAGATTAC

>1459

TGGGATGGGGGGCTGCACGTAGATGGGGTGGCAGTGACCCTCACTTCCTGCTGTATCC  
CCAGACCCAAAGGTGAGGCCCTTGGTCCCCTGGAATGAGTGGCTGATCTGGGACCCT  
GGTTTCCTATGTCTGATAACAGCT

>1460

TCAGCCCCAATCCCAATACCAGCTGAGTCAGATGACATTTACAAGATCCCTGCTGACA  
GCCTGGAGTGGGTAAGAGGCCCTGGGAAATGAGGCGATACCTCAGTCTGGGGTCCAG  
AGACTCAGATGCGTGGCCTCAGGC

>1461

GGATGGGGAGGCCCCGAAAGACAGAAGTGCTGCTGAAGGTCATGGATGCCAAGCACAA  
GAACTGCATGGAGGTGAGAGGCAATGTGGACCAGACTTTTGGAGTCGGGGGCTGGCT  
TGAGCGGGGCTCGTGGATGCAGAGAC

>1462

CGAGCTTGATGAGCCAAGTGTCGTACCGGCATCTCGTGCTGCTCCACGGCGTGTGCAT

GGCTGGAGACAGGTGAGTGCTCCTAGGGGGTGTAAAGGGGAGAGGGAGGAAAAGA  
GGGCGAGGGGGGAAAGAGAGCTAGGG

>1463

TGGCCACCTGGTGCCAGCCAGCTGGAAGCTGCAGGTGGTCAAACAGCTGGCCTACGC  
CCTCAACTATCTGGTGAGTGCTCCTCCCCCAGGGGATTTGGTTTGGGGGGAGGGGGG  
GGGTTTAAAAAAACCCAACCCCCTA

>1464

GGCTGATGGGAGCCCGCCCTTCATCAAGCTGAGTGACCCTGGGGTCAGCCCCGCTGTG  
TTAAGCCTGGAGGTAAGTTCCTGGAGGTGGAGGAGGGAGGGGCTGAACAGGGCAAG  
GAAGTGGATCCCTGATCCCACTTTCA

>1465

CTTCGGCGCCACGGTCTGGGAAGTGTTTAGTGCGTCACCATGCCCATCAGTGCCCTG  
GATCCTGCTAAGGTCAGAGCCCCCTACCCGGCATCGGTCTCCGAACCCCCACTTTGAC  
AGCCGGGCAGACTGACATCCAGTC

>1466

GCCTATGAGCCGGTCCAGAGGCCCTCCTTCCGAGCCGTCATTCGTGACCTCAATAGCCT  
CATCTCTTCAGGTGCCCCGCTGGGACGGGTGGGTGGGGAGGGGCTGTGATGTCATATTG  
GGCCAGTGGAAGGAGCGTG GTT

>1467

GCTCTATGCCTGCCAAGACCCACGATCTTCGAGGAGAGACACCTCAAGTACATCTCA  
CAGCTGGGCAAGGTAAGGTGGGCAGGGCCAGGGTGGGTGGAGAGGCAGGGCAGCA  
TCCAGGTACCTGGACATCAGTGCCGC

>1468

CTTCCTGCAGCGGCACCGCGCGCGCCTCGATGCCAGCCGCCTCCTTCTCTATTCTCGC  
AGATCTGCAAGGTGAGAGGGGGGCGCCCCGGGACTTGTGGGGATTCAGCTGGCACGGC  
CTGGGCAGGGGTCTGCTTGAGGT

>1469

CTGTGGGCAGACAGCCATGCACCTGCCCCAACTCTGGCAGCACCCGGCCAGCCTCTG  
CGCGTTCTCAAGGTAAGAGCAGGCCAGCCCTCCTCCCTCCTGCCCCGGGGCTGGAGAG  
GCTGGTGTGGACAGGACCCTGTGCC

>1470

CCGCTCCTTCAGCTCCACCGCCCGGAACCGCTTTCAGAACCGAGTGCGCGAGAAACA  
GAAGCTCTTCCAGGTGGGGGGTCGGGGGGGGTGGGGATCCGACGCGCCAGCCGGGA  
GCGCGCCGAGCCGGGGCAGGCGGGGCG

>1471

CCGTTGTACCTGAAGGGCGGCATCGTTGACAACATCCTGTACCGAGTGACAATGACGC  
TGTGTCTGGGCGGTGAGCGCAGGGCCCGTCTGGGCTGCGGGGGAGGCGGGGCTGGAC  
CCAGAGTAAGAGGTGGCTGGTTTCT

>1472

TCCTGCCTTGGCCATGAGGGAAATCGTGCTCACGCAGACCGGGCAGTGCGGGGAACCA  
GATCGGGGCCAAGGTTGGCAGCCGGGGCTCTGAGGGCCCAGCCCGGCCTGCCGGGTG  
GCCGGGGAAGATGTTGGCAGCGGCGG

>1473

GCTGGCACCTACCACGGGGACAGCCACCTGCAGCTGGAGCGCATCAACGTGCACCAC

CACGAGGCCAGCGGTGCGACCCCCGTCCTTCCCCACCGCCCTCCTGGGAACGCGGC  
CCTCCCCTCGCTCATGCCCTCCCGCC

>1474

CCGGGCACCATGGACTCTGTGCGCTCGGGGCCCTTCGCGGAGGTCTTCAGGCCAGAC  
AACTTCATTTCCTGAGCTGCGGGCGAGGACTGGGGTGCGGCTCCTTAGCCAGGGCA  
GCTCGAAATCCAGGAACGCTCCAAG

>1475

CGCTGCAAGCCCTTCTACTGCGACAGGCCATGGCAGCGGGCCACTGCCCCGGAATCCC  
ACGCCTGCCTCGGTGAGGCCTTGAGGGGTGGCCTGGGGACCTTGACACAACCAGCC  
TGCCCCTGACCCATCCCTCCCTGCA

>1476

TGCCACTACTGCCGGGAGGGCTTCTATCGAGACCCTGGCCGTGCCCTGAGTGACCGTC  
GGGCTTGACAGGGGTGAGCCACCACCGGCCACCTGCAGGCCCTCACCTCTGACTTCCC  
AGATCCCAGACAGGCTTCTGACC

>1477

ACTGGCCTCACCTGCAACCGCTGCGCGCCTGGCTTCCAGCAAAGCCGCTCCCCAGTGG  
CGCCCTGTGTTAGTGAGTGACCCTGCCCCGCCTCAGCCACCAAGCCAAGGCCACCCCA  
GCTCCCTGCTGTTGTCCCGTCTAT

>1478

GACTCGCACTGCAAACCTGCCCCTGGCAGCTACCGCATCAGCCTAAAGAAGTTCTGCA  
AGAAGGACTATGGTAGGTGCCCTCAGGCCTCCCGCGGACCTTCCCACCTTCCTCCTCT  
CCCTACCTTCCCTCCTCCGCCAGC

>1479

GCGGCGGGTGGCAGCGATCCGCGGGCTGGCGACGTAGAGGAGGACGCCTCACAGCTC  
ATCTTTCCTAAAGGTTGGGCTCGGGGCTGCCAACTCCCCCGCGCCACTTCGCGTGGT  
CGCCGCAGGCCTGGCGTTATGCGCG

>1480

TGAAAACATTAAACTACACAGCCCGTTTCAGTCGTTTCAAAAACAGAGAGACCATTGC  
CAGTGTTTCGTAGGTGAGTGCTAAAAGAAAGTTTTTATTAATCCAAACCATTGGACAAC  
GCATGTAGAATGCTGTCCCCCTCC

>1481

AGTTTGAGTTGGCCTGTTTGGCCAACCTTTGCCAGAGACTGCTGAGGAGTCCAAGGC  
TCTAATCCAAGGTTAGTACCAGTTGTGATAAGTTCTCTGTATACTGGATAAATTCCTAC  
AAATAGAATTGGTGTGTCTAAA

>1482

GCTCCGGGGACACTTTGCGTTCGGGCTGGGAGCGTGCTTTCCACGACGGTGACACGCT  
TCCCTGGATTGGGTAAAGCTCCTGACTGAACTTGATGAGTCCTCTCTGAGTCACGGGCTC  
TCGGCTCCGTGTATTTTCAGCTC

>1483

AGGAGCCGCAGTCAGATCCTAGCGTCGAGCCCCCTCTGAGTCAGGAAACATTTTCAGA  
CCTATGGAACTGTGAGTGATCCATTGGAAGGGCAGGCCACCACCCCGACCCCAACC  
CCAGCCCCCTAGCAGAGACCTGTG

>1484

CTACCAGGGCAGCTACGGTTTCCGTCTGGGCTTCTTGCAATTCTGGGACAGCCAAGTCT

GTGACTTGACGGTCAGTTGCCCTGAGGGGCTGGCTTCCATGAGACTTCAATGCCTGG  
CCGTATCCCCCTGCATTTCTTTTG

>1485

AAGCAGTCACAGCACATGACGGAGGTTGTGAGGCGCTGCCCCACCATGAGCGCTGC  
TCAGATAGCGATGGTGAGCAGCTGGGGCTGGAGAGACGACAGGGCTGGTTGCCCAGG  
GTCCCCAGGCCTCTGATTCTCACTG

>1486

GCGTGTGGAGTATTTGGATGACAGAAACACTTTTCGACATAGTGTGGTGGTGCCCTATG  
AGCCGCCTGAGGTCTGGTTTGCAACTGGGGTCTCTGGGAGGAGGGGTAAAGGGTGGT  
TGTCAGTGGCCCTCCGGGTGAGCA

>1487

GTAACAGTTCCTGCATGGGCGGCATGAACCGGAGGCCCATCCTCACCATCATCACACT  
GGAAGACTCCAGGTCAGGAGCCACTTGCCACCCTGCACACTGGCCTGCTGTGCCCCA  
GCCTCTGCTTGCCGCTGACCCCTGG

>1488

ACAGAGGAAGAGAATCTCCGCAAGAAAGGGGAGCCTCACCACGAGCTGCCCCCAGG  
GAGACTAAGCGAGGTAAGCAAGCAGGACAAGAAGCGGTGGAGGAGACCAAGGGTG  
CAGTTATGCCTCAGATTCACCTTTTATCA

>1489

GCCCAACAACACCAGCTCCTCTCCCCAGCCAAAGAAGAAACCACTGGATGGAGAATA  
TTTACCCCTTCAGGTACTAAGTCTTGGGACCTCTTATCAAGTGGAAGTTTCCAGTCTA  
ACACTCAAAATGCCGTTTTCTTCT

>1490

TGAATGAGGCCTTGGAAGTCAAGGATGCCCAGGCTGGGAAGGAGCCAGGGGGGAGC  
AGGGCTCACTCCAGGTGAGTGACCTCAGCCCCCTTCTGGCCCTACTCCCCTGCCTTCCT  
AGGTTGGAAAGCCATAGGATTCCAT

>1491

TGCGCCTGCTGCTGCTGCTGCGGCCCCCGCGCGGCCCTGCGGGCCCCCAGAGGCG  
GCCGCCGGGCTGGGTGAGTGGGCGCGGAGCGGGGCGCGGGGCCCGGCGGAGCCCGG  
GGCGCGGCGCAGTGGGTGCCGAGCTTG

>1492

CCAGTATCCTGACGTGAGTACGCGCGAGCGCCTGGCCGGCCGCATCCGCCTTCGCGAG  
GAGCGCGTGAGGTGAGTGCCCCGCCAGCCTTTCCCCGGAGCGCGCGGGCCCGCGGC  
TACACTGGAAGTGGGGTCTGGCGGG

>1493

CCCGAGGAGGTGATCGCCACCATCTTTTCTCCGCCTGGTGGGTCCCTCCCTGCTGCG  
GGACAGCAGCTGGTGAGTACCCCTCCTGGTTCTTCTGGAAGTAAAAAGGGTGTCTTTT  
CGGTTGAAAGTACTTTTCAGCCTA

>1494

ATTAAAGAGAGAATGGGCCAGTGTCATGCGCTGCATAGCAGGTTTTGGTGGCATTAAAC  
ACGCCAGTGCTGTATCCTTAATTTTCTGTGCTACGTCCAGAGTATCTTCTTAGGTTATATA  
TTGAAGCATTTTGTTTTGTT

>1495

GGCTGGGGATCACCATAGCTTTTCTAGCTACGCTGATCACGCAGTTTCTCGTGTATAATG



GTGTCTATCAGTATACAGTAAGTGTGTGTTTTCAAATATTGGCTTTGGAAAGCTTAGATA  
TTTTCATATTTTATTTGTTT

>1496

TTCTTGGCTCCCTTGATATTTTTCTCAGGAGGCGTCACGGTGGGGAACATAGGACGAC  
AGTTAGCTATGGTAAGTGAAATGATCATATTATCTTCTAAAACTTGCTTCTCTTTACCTTG  
ATAGAATGACTTTACATGAT

>1497

GGCCGGAAGATGAAACTGAGCTTCACCCTACTCTGAATGCAGATGACCAAGAATGCAA  
ACGAAATCTCAGGTGAGCAGTATTTTAAGAAGGTCCTGTTGTCAGTTTTTCAGATTTTC  
TTATTCCCAAGGCCTTTAAACTG

>1498

ACAGAGCACCTGTGGGAGGACTAGGAAAATTAAAGATGATTATAGCCAAAAATGGCCC  
AGACACAGAAAGGTAGGTAATTATTAACCTGTGACTGTATACCTACCGAAAACCTTGCA  
TTCCTCGTCACATACATATGAAC

>1499

AGGTCAGGAGGAGACTGTGAGAATTGTTGCTCTGGATCGAAGTTTTACATTGGCTGT  
TACAAGTGCGAGGTCAGGGGCCCCCAGCACGTGCAAGGGGCTGGCAGTGTCTAGGGT  
GCTGGGTAGAGCATGAGGGGGAACA

>1500

CTGCCCTTCTTCCCCGAGAGCCCCAGGTACCTGCTGATTCAGAAGAAAGACGAAGCGG  
CCGCCAAGAAAGGTAACGAGGGCTCTGGCGGGGGCGGCCTCCAGGTTCTGCTCCCCA  
GCCCTGGTCCGACGGTGCCGCTTCT

>1501

CTCGCTGCGCTGGCAGCTGCTGTCCATCATCGTCCTCATGGGCGGCCAGCAGCTGTCTG  
GGCGTCAACGCTGTATGGGCCGGGCTGCGGCTCGGGAGCTGGGGAGGGCTCGGGGGG  
CGCGGGGCGCAGGTCCTGGGGCGCC

>1502

GCCGGAGGAGCACGTGCAGTACGTGACGGCCGGCACCGGGGCCGTGAACGTGGTCAT  
GACCTTCTGCGCCGTGAGTGTCTGGGAGCTGCCCACAGCCTCCACCCAAGGCCCTC  
GGGCCCCACGCCCCAGCCTCGGCGC

>1503

GCTGCTGCTGCTGGGCTTCTCCATCTGCCTCATAGCCTGCTGCGTGCTCACTGCAGCTC  
TGGCACTGCAGGTGAGGACAGGCCAGGGTCCCAGGAGCCCGGAGCTGCACCAGGAA  
GACCAGTTGCCCCCTCCATCCTGCG

>1504

GTGTCCTGGATGCCATACATCAGCATCGTCTGTGTCATCTCCTACGTCATAGGACATGCC  
CTCGGGCCCAGTACGTACCCAAAGCTGGCCTCAGGGTGTACAACCCCCCTGGTCCC  
AGAAGCTCCGGGCTGGAGCTCC

>1505

CTTCATGGTGGGGGGCAGTGTGCACTGGCTCTCCAACCTCACCGTGGGCTTGATCTTC  
CCGTTTCATCCAGGTGAGTGGGGCCCCGGGGCCCACGCTCACCACCAGATCCCCATGCAG  
TACAGTGCGAGCCCCTGGGCAAAC

>1506

GGCTGTTCTCAGGTATTGGCCTGCACTTGGCAATACATCTGGCTTTGGACCCATCCCA

GAGCTTCAAAGGTATAGATAGGTAGGGACAGGGAGGGAGAGAAGGGAAAAGCCCTTG  
GAGGCCAGAAGAGAAGTCAGATCT

>1507

GATGTAAGGAACTCAAGCTCCCTGGCCGCTGCCCCGGAACGCGTGACCGAGGGCCGT  
GTGGATGTGCTGGGTGAGCCTCCTGGAAGCATATGGGCTCCTAGGAGCCTTCTCCGCC  
CTGCGTTGAAACCAACATGTCCCCA

>1508

TTCCTGCCAGACATGAAGCGGCCGGGTTCGGGACGCGTGTTGGTGACTGGGAGCATG  
GGAGGATTGATGGGTGAGTGGCAGGGACCGGGCCCCGAGCTCCAGATTCTTTGTGTGC  
AGAGCTGAGCCTTGAAGGCAGGCTC

>1509

GCGCCAGCAAGTTCGCGCTCGAAGGCTTATGCGAGAGTCTGGCGGTTCTGCTGCTGCC  
CTTTGGGGTCCAGTGAGTCAACACCCCCGTCTCCTCAACCCTCTTAAGTCTGACCTAG  
AGATGCCGAGCACCTGTCCTGCG

>1510

TTATGACCTCACCCGGGAGCGCAAAGCACGCGACATGGTGGGGCAGGTGGCCATCAC  
AAGGATTGAGCAGGTGAGGGCAGGTGGTGCCATCAGGGTGTCCCCCAGCGGGGTTC  
AGGGCTCTGGTTCCTTCACAGAACAG

>1511

AGAACCAAGGCTACTATGACTACGTGAAGCCAAGACTTCGGACCACCATCAGCCGCGC  
CAAGCCCGTCTGGTAAGGCTTCAGTCCCTGCCAGGAAGGCTGTGGGACCCTCCCCTCA  
GGCCAGTAGGCAGTTAGCCAGGCA

>1512

ATTGTGGATTGTTGGTCAAGGAGCTTGACAGAGACACAGTTTTTTGCTCTGGTGAATTACAT  
CTTCTTTAAAGGTAAGGTTGCTCAACCAGCCTGAGCTGTTTCCCATAGAAACAAGCAA  
AAATATTTCTCAAACCATCAGTT

>1513

AACTACAGCACCTGGTAAATGAACTCACCCACGATATCATCACCAAGTTCCTGGAAAAT  
GAAGACAGAAGGTGATTCCCCAACCTGAGGGTGACCAAGAAGCTGCCCACACCTCTT  
AGCCATGTTGGGACTGAGGCCCAT

>1514

CACTAAGGTCTTCAGCAATGGGGCTGACCTCTCCGGGGTCACAGAGGAGGCACCCCT  
GAAGCTCTCCAAGGTGAGATCACCTGACGACCTTGTTGCACCATGGTATCTGTAGGG  
AAGAATGTGTGGGGGCTGCAGCACT

>1515

GGCCGGCTTCGCGGGCGACGATGCCCCCGGGCCGTCTTCCCCTCCATCGTGGGGCGC  
CCCAGGCACCAGGTAGGGGAGCTGGCTGGGTGGGGCAGCCCCGGGAGCGGGCGGGA  
GGCAAGGGCGCTTTCTCTGCACAGGA

>1516

CGAGGAGCACCCCGTGCTGCTGACCGAGGCCCCCTGAACCCCAAGGCCAACCGCGA  
GAAGATGACCCAGGTGAGTGGCCCGCTACCTCTTCTGGTGGCCGCCTCCCTCCTTCCT  
GGCCTCCCGGAGCTGCGCCCTTCT

>1517

GGCCAGGTCATCACCATTTGGCAATGAGCGGTTCCGCTGCCCTGAGGCACTCTTCCAGC

CTTCCTTCCTGGGTGAGTGGAGACTGTCTCCCGGCTCTGCCTGACATGAGGGTTACCC  
CTCGGGGCTGTGCTGTGGAAGCTA

>1518

GTACCCTGGCATTGCCGACAGGATGCAGAAGGAGATCACTGCCCTGGCACCCAGCAC  
ATGAAGATCAAGGTGGGTGTCTTTCCTGCCTGAGCTGACCTGGGCAGGTCAGCTGTGG  
GGTCCTGTGGTGTGTGGGGAGCTG

>1519

AGCTGGTTTTGCTGGGGACGACGCTCCCCGAGCCGTGTTTCCTTCCATCGTCGGGGCGC  
CCCAGACACCAGGTGAGTGGATGGCGCCGCGGGGCTCCTGGGTTCCTGCGTTGCGGGG  
TGGGTTCGGTGTGCGCCGCGAGGCT

>1520

GGAGGAGCACCCAGTGCTGCTGACCGAGGCCCCCTGAACCCCAAGGCCAACAGAG  
AGAAGATGACTCAGGTGAGGCTCGGCCGACGCCCGTGCTCCTCCCGTCCTTTCCCCAG  
TCATTTTCTCGCCCGGCTTGATTCT

>1521

GGCCAGGTCATCACCATTGGCAATGAGCGGTTCCGGTGTCCGGAGGCGCTGTTCCAGC  
CTTCCTTCCTGGGTAGGTGTTGTGAGCTAAAGGTTTCTACTCTTTCATCCTCGGTGACA  
CAGCATCACTAAGGGAGGGCTCT

>1522

GTACCCGGGCATTGCCGACAGGATGCAGAAGGAGATCACCGCCCTGGCGCCCAGCAC  
CATGAAGATCAAGGTGAGTCGAGGGGTTGGTGGCCCTCTGCCTGGCTCGGGAGAGCT  
GACTGGGGGGCGCTCTGCGAGCTGAA

>1523

TTGGCATGGACAAGCCGCTCACCCCTTCCAGACTTCCTGGCCAAGTTTGACTACTACATG  
CCTGCTATCGCGTGAGTTGCCCCCAACCCACAGGTCCTAGGGCAGCATTGATCCCTATG  
ACTAGGACCAGGCCTGTCCCTC

>1524

TGGAGGTGCGGTACAGTCCGCACCTGCTGGCCAACTCCAAAGTGGAGCCAATCCCCTG  
GAACCAGGCTGAGTGAGTGATGGGCCTGGAAGGGGCCATGCTGAGGGTGTGGCTGGG  
AGGCTCAGCTCTGAGACTGGAAGGG

>1525

CTGCAGGAGGGGGAGCGAGACTTCGGGGTCAAGGCCCGGTCCATCCTGTGCTGCATG  
CGCCACCAGCCCAGTGAGTAGGATCACCGCCCTGCCCAGGGCCGCCCGTCTCACCCCTG  
GCCCTGACCTCCTGGCCTAGCAGTG

>1526

CATTGACCTGGCTGGAGATGAGACCATCCCAGGAAGCAGCCTCTTGCCTGGACATGTC  
CAGGCCTACCAGGTGGGTCCTGTGAGAAGGAATGGAGAGGCTGGCCCTGGGTGAGCT  
TGTCTCCCACCCATAGTTGGGAGAA

>1527

GGCTGTGAAGAGCGGCATTACCGTACTGTCCACGCCGGGGAGGTGGGCTCGGCCGA  
AGTAGTAAAAGAGGTGAGGGCCTGGGCTGGCCATGGGGTCCCTCCTCACTGCCTCCTC  
CCATACTTGGCTCTATTCTGCTTCT

>1528

ACACGGCTACCACACCCTGGAAGACCAGGCCCTTTATAACAGGCTGCGGCAGGAAAA

CATGCACTTCGAGGTAAGCGGGCCAGGGAGTGGGGAGGAACCATCCCCGGCTGTCCC  
AACTTCCTGTATAGAGAGGCAGAAAG  
>1529  
CACCTGGACACTGATTACCAGATGACCAAACGGGACATGGGCTTTACTGAAGAGGAG  
TTTAAAAGGCTGGTGAGTGGGTGTGAGCCATACTGGCCTTGACTCGGGTTTGGGAGTA  
TGGTATCTACAGGTCCAGTCCGGG  
>1530  
GAAGATGAAAAGAGGGAGCTTCTCGACCTGCTCTATAAAGCCTATGGGATGCCACCTT  
CAGCCTCTGCAGGTAGGTTCTGTCTGGGCTTCTGGGCAGTTGCCTGTCTTGCCCCA  
GTGTGGCTTTCTGTGGGACTTCTA  
>1531  
AATTTGTGACTCACAATCTGTCTTTTGATGAAATCAACAAAGCCTTTGAACTGATGCAT  
TCTGGAAAGAGGTAGGCTTTCTCTTTATATATCATAGAATGTAATAATGATGTTGAGTTT  
GAGGGGATGGAGAGTCGAAAA  
>1532  
TCAATTTTTTTAATTTTCCTACTAAATTTTACTGAATCCAGAACACTGCATAGAAATGAA  
TATGGAATAGGTGAGATATTTTGTGTTTTTCTTGTCTTTTCTCTATATCAAAATTTTTTAA  
ATTATAAAATTTGCATTAA  
>1533  
GAAAGATGCATTGACTGCAATTGAGAAACCCACTGGAGATGAACAGTCTTCAGGGTGT  
TTAGAAAACCAGGTGAGTGAATAATTTTAAAAAAGCATTGTGATATTTGACAAAAATTT  
AGCATGCTGAAGAGAAGATACAA  
>1534  
TTTTCCAAGTTCCAGAACCTGTCACAAGCTGTGAAGCATATGAAGAAGACAGGGAGA  
CATTCATGAACAAGTAAGGATCCAGTTTAAAGGTAGATGCAAACCTCAGAAACACAGC  
AATGGCAAGCCTAATTTAGTATTTT  
>1535  
TGCTCGCTATGACAAAATAATTCCATCTTGCTGCAAAGCTGAAAATGCAGTTGAATGCT  
TCCAAACAAAGGTATCATATTTGCGTGGATATCTGAACCAGTACTGTAGTCTATGACTCA  
TAAAACAAAACAAAGTTAAA  
>1536  
AAAGCAGCTTGTTAAATCAACATGCATGTGCAGTAATGAAAAATTTTGGGACCCGAAC  
TTTCCAAGCCATGTAAGTTCAAGTTCTATCTAGGGAAGAGGGTGAGAGCTACAGAACT  
ACCATTTTGCAATTTGGGTTCGTT  
>1537  
AGTCCTGGATGTGGCCCATGTACATGAGCACTGTTGCAGAGGAGATGTGCTGGATTGT  
CTGCAGGATGGGGTGAGGAGTCTTGCTTCTTAAAATAGAAGATTTTCACTCCCTTTTCT  
TTCTTTTTGTCTCATTCTAAAAG  
>1538  
TAAACAGGTTTTTTAGGAGATAGAGATTTTAACCAATTTTCTTCAGGGGAAAAAATATC  
TTCTTGGAAGGTAACACACTCTGTAAATGCATGTTTCATGCAAGTAAAAATGATTATGT  
GGCTGACAGATTTGCGTTGTTG  
>1539  
TAAAGGATACCAGGAGTTATTGGAGAAGTGTTTCCAGACTGAAAACCCCTCTTGAATGC

CAAGATAAAGGAGTAAGTTGCTCTAGAATTTTAGGGGAGTATGAAAACTGGATTGATA  
TCATCTGTATAAAAATGCTGTTTG

>1540

AGAGCCAAGCATTGGCAAAGCGAAGCTGCGGCCTCTTCCAGAACTAGGAGAATATTA  
CTTACAAAATGCGTATGTTTTTGTAACAGTATTTTGTAGTGAATTAAAATTATTAAAGAG  
AATGTAGCCTTCCCAATTCTC

>1541

AATGGCAGCCACAGCAGCCACTTGTTGCCAACTCAGTGAGGACAACTATTGGCCTGT  
GGCGAGGGAGCGGTGAGTGTCTGCTTGGTTTGGTCCCATCTCATTTCTGCCCTGTTTGA  
CTTGAAATAGCCTCATAATTCCC

>1542

ATGACAAGTTCATTTCCATAAGGATCTGTGCCAAGCTCAGGGTGTAGCGCTGCAAAC  
GATGAAGCAAGAGTAAGAACTGTTACTTGCTAGCATGGAAAAGAATGACAACCCCA  
AAGAGTAACTGAGACTTCTACCTCG

>1543

TGCAGATTTCTCAGGCCTGTTGGAGAAATGCTGCCAAGGCCAGGAACAGGAAGTCTG  
CTTTGCTGAAGAGGTACATGCAGCTCATTTTCACTCAAAATACTTGCTATGGAATTTTC  
TGTAGTGGATAATGAAAGGAAGA

>1544

GCTGATACACGCAGACCAGATCTGGTCAGGTCCTCGGAAGCTGAGTCCAGAGCGATGC  
TGCTGAAGACAGGTACCTACACCGGCTGGGGTGGCTTGGAAGGGTAGGGGTGAGTGC  
TACAAGGAGTGCTTTGGCCCTTCTT

>1545

TGGGCTGGCTGGCCTGGGAACGCTTCCGCTGCAACATTAAGTGTGATGAGGACCCAAA  
GAACTGCATAAGGTGAGTAAGGTCCACACTCACCTGATGAGCCTTGCCCAGGGCCCTG  
CAGATTCGGGGGCAGGAAGTGGAG

>1546

CGATGCCAGTGGCCGCCTGATGCCAGATCCCAAGCGCTTCCCTCATGGCATTCTTTCC  
TGGCTGACTACGTGAGCCGCACCCAGCCCTGCCCTTGCGCTCAGGGCTAGACCACTCC  
TTTACCCCTACCTCGCTTAGGGC

>1547

TTCGCCGAGTGGAAGGTAGACATGCTCAAGCTGGATGGCTGCTTCTCACCCCCGAGG  
AGCGGGCCCAGGGTGAGTTACGCAGCTGGCTGGGGCACGTAGGCAAACGGGGAGGG  
TGGCCATGGAGACCCACCCAGCGCCC

>1548

GAATGCCACAGGCCGCCCATCGCCTTCTCCTGCAGCTGGCCAGCCTATGAAGGCGGC  
CTCCCCCAAGGGTAAGCCATTCTCCCCCTGCCTGATGGCGCTTCCCACACCCAGGC  
CTCCTTACCTCCTGAGTGCCAGGC

>1549

TTGGTTCTGTGGAGCACCAGGACATACTGCAGCCAGTGGCCGGGCCCTGGGCACTGGAAT  
GACCCTGACATGGTACCAGGATGGAGGGGGATGTCTAGGCCACCATCTGTGACGAC  
CCTGCTCCCCACTGCCCTGTGCTT

>1550

TCTGCAGAATCCACTCATGATCAAAATCAACCAGGATCCCTTAGGCATCCAGGGACGC

AGGATTCACAAGGTACTAGGGTGTGGAGGGAAGGAAGGGGAGGGCTGAGGAACTGG  
GTTCTCCTGAGAGAAAGGCTGCCAGC

>1551

GACCGATATGCCTTATCGCTACCACTCCTCCCTTGGCCAGCTGAACTTCACCGGGTCTG  
TGATATATGAGGTGAGCACCCGGCTGCCTGCCAGCCCGCTGGGCTTCAGATTCTGTGG  
GAGGGTATTATGGGGGGTGGTT

>1552

GGTCAGCTCAGGCTCGGCCAGGGGCAAGAAGCTGTGCGAAATCATGGAGAAGGGGCA  
GCTGGTTCCACTGGTGAGTGGGCCCTGGTGGGGTGAGAGGCAGGGGATGACAGTAGC  
CCTGAGTGGGTGTCCCACCAGCAGCA

>1553

TACTTCCAAAGGCTTCCTGATTGATGGCTACCCGCGGGAGGTGCAGCAAGGAGAAGA  
GTTTGAGCGACGGGTAAGGCACTGACCCAAGTGGGGATCCTGGTGGGCTGGGGCAGG  
ATAAGACTCCCATCCCCATGGGCGGG

>1554

GCTGGAGACCTATTACAAGGCCACAGAACCCGTCATCGCCTTCTATGAGAAACGTGGC  
ATTGTGCGCAAGGTGGGCCCCGCGGGACGGGGCAGCTCCGGGAAGAACGGGTTCCTA  
TGTGGCTCCGCCTCAGCTCACTGTG

>1555

TTGTGCTGCTATCTACGGCAATGAGCCTGAGATTGGGGAGGCCCTGAAGGAGGACGTG  
GGACCAGGCAAGGTAAGGACTGGGGTTGTAAATAGAGGTGGATAAGAGAACTTAGAA  
GCTGAAGCTAGGCTGGGGCCCAGCT

>1556

GGAAGACTCTGGCTGACCTCCAGCTGGAGTATCTGGACCTGTACCTGATGCACTGGCC  
TTATGCCTTTGAGTGAGCCTTGCCAGAGCCTCATCTGGGGAATCAGGGGGTTGAGCAG  
GATGGTGTAGTAACTTATTGTAA

>1557

GTCCAAC TTCAACAGTCGGCAGATTGATGACATACTCAGTGTGGCCTCCGTGCGTCCA  
GCTGTCTTGCAAGTAAGACAGCAAGCAGATGAGTGGTTTAGGGGTTGTCTGCTCAAGA  
GCATGAGGGAGCAGACGATGGATC

>1558

TGCTGGAGGAACCAGTAGTCCTGGCATTGGCTGAAAAGTATGGCCGATCTCCAGCTCA  
GATCTTGCTCAGGTATGGGGCAGTCTTAGGGAGAGGGCCCTGGGTTGGGAGGCAAGG  
GTTAAGGGATTTCTTATTTCAAGTGT

>1559

GCAGGTCCAGCGGAAAGTGATCTGCATCCCCAAAAGTATCACTCCTTCTCGAATCCTTC  
AGAACATCAAGGTACTTGGTAATGGGTTCTATCTTACTTTAGCTCTTTGGGACATTTTCT  
TGGCCCTGACTCTACCTGGCT

>1560

TAGCCCAGAAGAGATGAAGCAGCTAAATGCCCTGAACAAAAATTGGAGATATATTGTG  
CCTATGCTTACGGTGAGGATGTATCAGCCTCCTAGACTTGGGGAATGTGAGATTTGGGG  
TGGGATTCTGGCCCAGGTGTGAC

>1561

AACTGCCGGCATCTGAGGTTTCCTCCAAGGCCCTCTGAAGTGCAGCCCATAATGAAGG

TCTTGGCGGCAGGTAAATACACCCGCCCCGCGCCGGCTTCGCGTCCCCGCTGCGGGGC  
GCGGCGGCAACTTGGGGCGCTTGG

>1562

CCTCATGAACCAGATCAGGAGCCAACTGGCACAGCTCAATGGCAGTGCCAATGCCCTC  
TTTATTCTCTATGTAAGTTACCCCTGGGATACTGACAGGAGATGGCAGGGAGGGGGCTT  
GTAAATATCATTAGGGGCTGTCC

>1563

GACATGCAGGGGCCCTGGGTGCTGCTCCTGCTGGGCCTGAGGCTACAGCTCTCCCTGG  
GCATCATCCCAGGTAATGAGGCTCCCCAGCCTGCCCTACACACACACACACACACA  
CCACCCCCCAGCCCAGGCTGACCT

>1564

CTGGGTGCCGCCAAGAAGCTGCAGCCTGCACAGACAGCCGCCAAGAACCTCATCATG  
TTCTTGGGTGACGGTGAGTGAGCCAGCCTTCAGCCCCGAGCCCTCACAGCCCCGG  
CGCCCCGACCCTCAGTGGTTCCAGGA

>1565

GAAGAAGGACAACTGGGGCCTGAGACCTTCCTGGCCATGGACCGCTTCCCGTACGT  
GGCTCTGTCCAAGGTAAGTGCTGGGCTACCTTAGAGTCCTCCAAGCAGAGAAGGGGA  
ATCCTGGCTATGGAGTGTGGTAGGAG

>1566

CGCTTTAACCAGTGCAACACGACACGCGGCAACGAGGTCATCTCCGTGGTGAATCGGG  
CCAAGAAAGCAGGTGGAGCTGGGGCCCCGGCTGTGGGGTCAGGGCCAGTGACAGACC  
TCTATCGCATATCCTGACCTCTATCA

>1567

GCCTGCCTCGGCCCCGCCAGGAGGGGTGCCAGGACATCGCCACGCAGCTCATCTCCAA  
CATGGACATTGATGTGCGACCCCCGGGCCAAGGGTGGGGCTGGGCAGAGAGTAGCAG  
GGAGGGGGCACCAGCTCAGACCAGGC

>1568

TGACTACAGCCAAGGTGGGACCAGGCTGGACGGGAAGAATCTGGTGCAGGAATGGCT  
GGCGAAGCACCAGGTGATGGGGGCTGGTGGGTGTGCTGGGCACAGCAGGGGGAGGG  
CAGAGGTGTGGGGCTCGGGGCTGTGGG

>1569

GCCCCGTACGTGTGGAACCGCACTGAGCTCCTGCAGGCTTCCCTGGACCCGTCTGTGA  
CCCATCTCATGGGTAATGACCCCCTTCCTGCCCTGGCATCCTCAGATGGCCTCAGATGG  
CACTTCTGAGCCTGTGTGCACAT

>1570

ATGGAGATGACAGAGGCTGCCCTGCTCCTGCTGAGCAGGAACCCCCGCGGCTTCTTCC  
TCTTCGTGGAGGGTGCGTGGTGGCCCTGGGAGTGGGGGGTTGGGGGTTGGAGCAGGG  
CAGGCTCAGCATCTCCCCCTCTGG

>1571

CTCGTCACTGCCGACCACTCCACGTCTTCTCCTTCGGAGGCTACCCCCTGCGAGGGA  
GCTCCATCTTCGGTAGGCCTGGGGATGAGTGGCAGGTGCTGCTGCAGCAATTAAGTGG  
GTGAAATCTGAGCCTCAGTCTCCT

>1572

CTATACGGAAACGGTCCAGGCTATGTGCTCAAGGACGGCGCCCCGGCCGGATGTTACGG

AGAGCGAGAGCGGTGAGTGCCGTGGGGTGGCCTGAGGGGGACCAGGGTGCCAAGGA  
TGGGGGGCTGGCGGGAAGGGGTCACC

>1573

GACATGCAGGGGCCCTGGGTGCTGCTGCTGCTGGGCCTGAGGCTACAGCTCTCCCTGG  
GCGTCATCCCAGGTAATGAGGCTCCCCAAGCTGTTCCACACACAGGGCACCCCCCTCAG  
CCAGGCTGACCTGATCTCTACTCT

>1574

CTGGATGCTGCCAAGAAGCTGCAGCCCATCCAGAAGGTGCGCAAGAACCTCATCCTCT  
TCCTGGGCGATGGTGAGTGAGCAAGGCCTGTCCAGCCCCGTAGTCCTCACAGCCCCGG  
CACCCGGGACCTTCAGTGGTTCCA

>1575

GAAGAATGGCAAACCTGGGGCCTGAGACGCCCCCTGGCCATGGACCGCTTCCCATACCTG  
GCTCTGTCCAAGGTAAGGGCTGGGGCCACCTCAGAGTCCTCCAAGCAGAGGAGAGGGA  
TCAAGGATATGGAGTGTGGCAGGAG

>1576

CGCTTTAACCAGTGCAACACGACACGCGGCAATGAGGTCATCTCCGTGATGAACCGGG  
CCAAGCAAGCAGGTGAGCTGGGGCCCCGCTGTGGGGTCAGGACCAGGCCCAAGATCTC  
GGTCACCGATCCTGACCTCTGTAC

>1577

GCCTGCCTCAGCCCCGCCAGGAGGGGTGCCAGGACATCGCCACTCAGCTCATCTCCAAC  
ATGGACATTGACGTGCGACCCCCGGGCCAAGGGCTGGGGCTGGGCAGAGGGGAAGGT  
GGCACAGGCTCAGATCCAGGCAACC

>1578

TGATGCCAGCCAGAATGGAATCAGGCTGGACGGGAAGAACCTGGTGCAGGAATGGCT  
GGCAAAGCACCAGGTGATGGGGGCTGGTGGGTGTGGGAGGCACGGCAGGGGGAGGC  
CAAGTGTGTGGGTCTCAGGGCTGTGGG

>1579

GCCTGGTATGTGTGGAACCGCACTGAGCTCATGCAGGCGTCCCTGGACCAGTCTGTGA  
CCCATCTCATGGGTAATGACCCCCTTCCTGCCCTGGCATTCCTCAGACAACCTCAGAGG  
GTGCCATCCGAGCCTGTGTGCCC

>1580

ATGGAGATGACAGAGGCTGCCCTGCGCCTGCTGAGCAGGAACCCCCGCGGCTTCTACC  
TCTTTGTGGAGGGTGCGTGGTGGCCCCCTGGGGAGTGAGGAAGGCGGGGGCGCGGCAG  
GGCAGGTTCAAGCATCACCCCCCTC

>1581

CTCGTCACCGCTGACCACTCCCATGTCTTCTCCTTTGGTGGCTACACCTTGCGAGGGAG  
CTCCATCTTCGGTAGGCCTGGGGAGAGTGGCAGGTGCTGCTGCATCAATTATGAGGGT  
GAAGTTTGAGCCTCAGTTTCCTC

>1582

CTGTACGGCAATGGCCCCGGGCTACGTGTTCAACTCAGGCGTGCGACCAGACGTGAATG  
AGAGCGAGAGCGGTGAGTGAGGCTGAATGGCCCGTGCAGGGGGACCAGGGTGCCAG  
GGATGGGGGCATTCGCGGGAGGGGGA

>1583

GGGCCCTGCATGCTGCTGCTGCTGCTGCTGCTGGGCCTGAGGCTACAGCTCTCCCTGG



GCATCATCCCAGGTAATGAGGCTCCCCGAGCTGCCCCTACACAACACACACACAGGGC  
ACCCCCAGCCCAGGCTGACCTGA

>1584

CTGGGTGCCGCAAGAAGCTGCAGCCTGCACAGACAGCCGCAAGAACCTCATCATC  
TTCCTGGGCGATGGTGAGTGAGCCAGGCCTTCCAGCCCTGCAGCCCTCACAGCCCCGG  
CGCCCGGACCCTCAGTGGTTCCAGG

>1585

GAAGAAGGACAACTGGGGCCTGAGATACCCCTGGCCATGGACCGCTTCCCATATGTG  
GCTCTGTCCAAGGTAAGTGCTGGGCTACCTTAGAGTCCTCCAAGCACAGAAGGGGAAT  
CCTGGCTATGGAGTGTGGTAGGAG

>1586

CGCTTTAACCAGTGCAACACGACACGCGGCAACGAGGTCATCTCCGTGATGAATCGGG  
CCAAGAAAGCAGGTGAGCTGGGGCCCCGCTGCTGGGTACGCGCCAGGTCACAGACGTT  
GGTCACATATACTGACCTCTGACAC

>1587

GCCTGCCTCGGCCCCGCCAGGAGGGGTGCCAGGACATCGCTACGCAGCTCATCTCCAAC  
ATGGACATTGACGTGCGACCCCCAGGACCAAGGGCTGGGGCTGGGCAGAGAGTAGCA  
GGGAGGGGGCACTAGCTCAGACCCA

>1588

TGACTACAGCCAAGGTGGGACCAGGCTGGACGGGAAGAATCTGGTGCAGGAATGGCT  
GGCGAAGCGCCAGGTGATGGGGGCTGGCGGGTGCAGGGGGCACAGCAGGGGGAGGG  
CAGAGGTGTGGGGCTCAGGGCTGTGGG

>1589

GCCCGGTACGTGTGGAACCGCACTGAGCTCATGCAGGCTTCCCTGGACCCGTCTGTGA  
CCCATCTCATGGGTAATGACCCCCCTTCCCTGCCCTGGCATCCCTCAGATGGCCTCAGATG  
GCACCTTCTGAGCCTGTGTGCAC

>1590

ATGGAGATGACAGAGGCTGCCCTGCGCCTGCTGAGCAGGAACCCCCGCGGCTTCTTCC  
TCTTCGTGGAGGGTGCGTGGTGGCCCCCTGGGGAGTGGGGGTGGGGGTGGAGCAGG  
GCAGGCTCAGCATCTCCCCCTCTG

>1591

CTCGTCACTGCCGACCACTCCACGTCTTCTCCTTCGGAGGCTACCCCCTGCGAGGGA  
GCTCCATCTTCGGTAGGCCTGGGGAGAGTGGCAGGTGCTGCTGCAGCAATTAAGTGGG  
TGAAATCTGAGCCTCAGTCTCCTC

>1592

CTATACGGAAACGGTCCAGGCTATGTGCTCAAGGACGGCGCCCGGCCGATGTTACCG  
AGAGCGAGAGCGGTGAGTGCCGCGGGGTGGCCCCCTGAGGGGGGACCAGGGTGCCA  
AGGATGGGGGGCTGGCGGGAAGGGGT

>1593

GGATTTCCCTTCAGAAAGGGCTAATGATCTCACTGTCTACAGATGACCCAATGCAATTCC  
ACTTTACCAAGGTATAGTATGGACTTGGGCAATACAAGCATATTTTGCTGGACTGTTGTT  
TCCCGTCCAGAATTTGAAAGT

>1594

CAAGCTGAGCACCTGTGATATGTGCGAAGTGGCAAGGAACAGTGTCTTGCAGTGTGG

AATTTCTCATGAGGTAGACCTGTCTTCAAATGGCTTCCCTTCTGAGTATAGGGTCTGCTA  
ACTTGAATACCGAAAAAGTAGTT

>1595

GCTCCTAGGTCAGACCAGAGCTAATCCCATGTACAATGCCGTGTCCAACGCAGACCTG  
ATGGATTTCAAGGTAGGGCCAGGAAAGCGGGTGCAGTCTGGGGCCAGGGGGCTTTCT  
GATGCTGTGCTCACTCCTCTTGATT

>1596

AGGTGGAGTGGCCGCAGCCATCTCCAAGACGGCGGTAGCGCCCATCGAGCGGGTCAA  
GCTGCTGCTGCAGGTACGTCTGGGATCCAGAGCCCAACCAGGAAGTGGGGGAAGGGT  
CGCACAGAAGGCGGGCGCCGAGGGGT

>1597

TTTAACGTGTCTGTGCAGGGTATTATCATCTACCGAGCCGCCTACTTCGGTATCTATGAC  
ACTGCAAAGGGTAAGTTTGCTGTGGGCTTTAACGTTGTGTTCTTAGGAGACAGTTTAA  
AAGAGCATTGTACCAACCTAAC

>1598

GCCGGGTTGACTTCCTATCCATTTGACACCGTTTCGCCGCCGCATGATGATGCAGTCAGG  
GCGCAAAGGAAGTAAGTTCCACTTGAGACAGAAGACAAAGTTGTAGTCGTGGGGCAA  
TCTGCTGCCACAACTGGTGATAC

>1599

GCCAGCTGAGCAACAATGCCAAGGAGGCCGTGGAACATCTCCAGAAATCTGAACTCA  
CCCAGCAACTCAAGTAAGAGGGACTACAGTGTGTGGTGGTGACGGGGAATTCTTAA  
GGCCATGCAATGTACTGGCAAGGGTT

>1600

ACACACTGGAGGACAAGGCTCGGGAACTCATCAGCCGCATCAAACAGAGTGAACTTT  
CTGCCAAGATGCGGTTAGAACCCTTCCCAGGGCACGGGAGAGCTGGGGTGTGTTTTTG  
GGTGGAGCCCTGGCAGATGGTCCAA

>1601

AGACCCTGGAGGACTACACTCGGGAATTCATCAACCGCATCACACAGAGTGAACCTCC  
TGCCAAGATGTGGTTAGAACCCTTCCCAGGGCACGGGAGGGCTGGGGTGTGTTTGTGT  
GGAGCCCTGGAGGATGTCCAAGAT

>1602

GCTGGGTGCAGACACTGTCTGAGCAGGTGCAGGAGGAGCTGCTCAGCTCCCAGGTCA  
CCCAGGAACTGAGGTGAGTGTCCCCATCCTGGCCCTTGACCCTCCTGGTGGGCGGCTA  
TACCTCCCCAGGTCCAGGTTTCATT

>1603

CCGAGCTGCAGCTGGTTGAGCAGCGGATCCGCAGCTTCCCCGACTTCCCCACCCCAGG  
CGTGGTATTCAGGTGCACGCACAGGCCGCCCTCGTGGCCCCGACCTGCGGGCCTACGG  
ATGGGAGCGCGTGCCCGCGACCTC

>1604

GCTCATCCGAAAGCGGGGGAAGCTGCCAGGCCCCACTCTGTGGGCCTCCTATTCCCTG  
GAGTACGGGAAGGTAAGAGGGCTGGGGTGGCCGGAGGAAGGGCAGGGTCGGGTCAC  
CGTGACCACTCTCCCCAGTTCTAAA

>1605

GAGATTCAGAAAGACGCCCTGGAGCCAGGACAGAGGGTGGTCGTCGTGGATGATCTG

CTGGCCACTGGTGGTAAGGGTCTCCCCGCAGCCAACTCTGTGCTCCAAGGGCCTGGTG  
GGAGTGGGACAGGACCTCGCTGTGT

>1606

GCTTGGGATCCTCCTGGTGACCTCTCCCGCTAAGGTCCCTCAGCCACTCTGCCCCAAGA  
TGGGCCGTGGGGTGAGTATCCCTAAAGAGCAGGGGTTCGCAGTCTAGAGGGTGAGGGA  
GGCTGCTGAGGAAGGATGAAGTGG

>1607

AGAGAATGGGGGCGGCAAGAAGAAACAGAAGGAGAAGGAACTGGATGAGCTGAAGA  
AGGAGGTGGCAATGGTGAGGGAACTGCTGGGCCATGGAGGAGGGGGCCCCATGCTGGG  
AGAGCTGTCCCTGCAGCCCATTGCACT

>1608

TGGGGCTATCCTCTGCTTCCTGGCCTACGGCATCCAGGCTGCCATGGAGGATGAACCAT  
CCAACGACAATGTGAGCCCACACGCCTGACCCGGGAACAGCCCGTGACTGTCCTCCA  
ACCCTGAACCCCCAACACAGTGGG

>1609

CTGCTTCTCCTACTACCAGGAGGCCAAGAGCTCCAAGATCATGGATTCTTCAAGAAC  
ATGGTACCTCAGGTAAGATGGCAGGGCTGGGCTCTGGGCTAGGCTGTAAGGTTTTGGC  
AAGAGTCCAGCTCATCTTCTGTCA

>1610

CCTGGTGGAGGTGAAGGGTGGAGACCGCGTCCCTGCTGACCTCCGGATCATCTCTTCT  
CATGGCTGTAAGGTGAGGAGGTCATACCAGAGCAAGCAGTTGAGTCTAAGGAGAAGG  
CTGTGTGCAGAGCTGAGAGGGGGCCC

>1611

CCCGAGTTCACCCATGAGAACCCCCTGGAGACCCGCAATATCTGTTTCTTCTCCACCAA  
CTGTGTTGAAGGTGAGAAGCCAGGCTGCCCCCTGTAGGAAAGAGTCTGAATCCTGAAT  
CCATAGTCAGGATGAAGGGCTCT

>1612

GGAGGCAGTCATCTTCCTCATCGGCATCATAGTGGCCAACGTGCCTGAGGGGCTTCTG  
GCCACTGTCACTGTGAGTGGGTGAGGCTGAGGTGCCACCAGGGGAGGGTCTCACTAC  
TCTTTCCTCAGAGTGATAGAGGCAC

>1613

CGCATGACCGTCGCCCACATGTGGTTCGACAACCAAATCCATGAGGCTGACACCACCG  
AAGATCAGTCTGGTGATTGGGTGCTCCAGAGGGGGTGGATAGGATTAGAGGAGGCTGA  
GGGCAGTGGCGTGGTGGGGTGAGT

>1614

GTCTCGAATTGCTGGTCTCTGCAACCGCGCCGTCTTCAAGGCAGGACAGGAGAACATC  
TCCGTGTCTAAGGTAGGGGGTCAGGACACACACCAGGTATGTTTTGGGGGTGTCTCCA  
AAGCCTCTTGCTGGCCCCAGCTTT

>1615

AGTGAGGAAAATGAGAGACAGAAACCCCAAGGTGGCAGAGATTCTTTCAACTCTAC  
CAACAAGTACCAGGTCTGCTTGGGTGCGCAGGACAGAGGAAGAGAGAGGGATATAAA  
TGGGTGAGGGTGGACAAAGCCAAGGG

>1616

GACAAGGAGATGCAAGATGCCTTTCAAATGCCTACATGGAGCTGGGGGGACTTGGG

GAGCGTGTGCTGGGTGAGAGGCCAGAAACAGGAGGCTCAGAAGGGGATTCCCAAGC  
CTCTGCGGCATCCCTGGGGTGGGGGAC

>1617

GTCTATGATTGACCCTCCCCGGGCTGCTGTGCCAGATGCTGTGGGCAAGTGCCGAAGC  
GCAGGCATCAAGGTACTGGCCTCCCATCCTCCCCTCCATTCTAGCCTCCCCCATGCCAG  
AGTTCAAGGAGCTGCAGTGGCTG

>1618

CAGAGGGTAACGAGACTGTGGAGGACATTGCAGCCCCGGCTCAACATTCCCATGAGTCA  
AGTCAACCCCAGGTGAGGCCTCTGCAGGAAGCCCCCTGTGCCCTAATCAACACGTCTC  
TTGCACAGAAGGCTTGGGTGTCCC

>1619

CACAGAGATCGTCTTTGCTCGAACGTCTCCCCAGCAGAAGCTCATCATTGTGGAGGGA  
TGTCAGAGGCAGGTGAGCACAGCCACGGGAGGCAGATGACAGGCAGGGACCGGGGA  
GGCAGGGACAGGGCCAAGACAAGCAT

>1620

TCTAAGCAGGCAGCCGACATGATCCTGCTGGATGACAACTTTGCCTCCATCGTCACGG  
GGGTGGAGGAGGGTGAGGAGGCTGCATGGGTGTTGGGATGGTTTGCAGGATACTGAAGC  
CGGCACCTCTGTTCCCTGTCCCTT

>1621

CATCATTGCCAACATCCCCCTACCTCTGGGCACTGTGACCATCCTTTGCATTGACCTGG  
GCACAGATATGGTGAGCGCAGGAGGTGGAGGAGGGGACAGGCAAGGCAATCGTGATG  
GCACAGTGGCAGGGAGGAGAGGTG

>1622

CAGCCACGAAACTCCCAGACGGACAAGCTGGTGAATGAGAGGCTCATCAGCATGGCC  
TACGGACAGATCGGTGCGCCAAGCCCCGGGCCTCGGGAGGGAACCCCAACAGGGTTC  
TTTTCCCAGCTTTCAGAGGAATGAGC

>1623

ACTGGGAATCCGCCTCGACTGGGATGACCGGACCATGAATGATCTGGAGGACAGCTAT  
GGACAGGAGTGGGTGAGTGGTGCTGTGTAAACACAGCGCACATGTGTGAAGGTACGG  
GAAGCTGAATGCCTGGCAGGAGTGG

>1624

TGGTGGTGCAAGTGGGCTGACCTCATCATCTGCAAGACCCGCCGCAACTCAGTCTTCCA  
GCAGGGCATGAAGTGAGTGCCACCCCATGGCACCTACCCACCCAGGCTCTGGGCAC  
ACTACCAACCCACACAGGCCAAG

>1625

AGACGGCGTTGGCTGCCTTTCTCTTACTGCCCAGGCATGGGTGTAGCCCTCCGCATG  
TACCCGCTCAAGTGAGTGTCTCTTTTCGGGCGGCCTGAGTAGTCATACGGGGGGCCTTC  
AGCCCCCTCCAGGATCCAAGTTC

>1626

TTCCCCTACAGCCTCCTCATCTTCATCTATGATGAGGTCCGAAAGCTCATCCTGCGGCG  
GTATCCTGGTGGTAAGCCCCCTCCACATCCCCCAGCAAAGTGCAAGCCCCACCACCA  
GCTCCTCCCTCCAGGACCACACG

>1627

GTGCCGCACGCCATCCTGATCTGGGTGTATGATGAGGTGCGGAAGCTCTTCATCAGGCT

CTACCCTGGAAGTGAGTAGCCTATGATTTTAGAGGCTCTGTTTACCCACTTCAACAGAC  
TCTCCATTTCTGATGTACTTTT

>1628

CGCATGACTGTGTCCCATCTTTGGTTTGACAACCACATCCACACAGCTGACACCACGG  
AAGACCAGTCAGGTGTGGGGGAGGGAGGGCACAGGCGCCAGGGCAGGATCTGGTGG  
ATGGTGGAGACCTGAAGAGGGATAGG

>1629

CATCACCGTCAGCGTGCCCCTGCCCCTCGGGTGCATCACCATCCTCTTCATCGAACTCT  
GCACTGACATTGTAAGTCCACAGCCCAGGGTACCCATCCACAGGGTGCCCAGAGACAC  
TTGCTTGCAGATGGACAGGAGGG

>1630

AACTGCAAAGATGCTGTCCGTGCGCGTTGCTGCGGCCGTGGTCCGCGCCCTTCCTCGG  
CGGGCCGGACTIONGGTGAGCACCGAAGGCCGGCATGATGCAGGCGGCCGGGTGGGGCTG  
CAGGGTGGTGGTGCGCCGGCTCGGG

>1631

AATGCTTTGGGTTCATCTTTTCATTGCTGCAAGGAACTTCCATGCCTCTAACACTCATCTT  
CAAAAGACTGGTAAGTTATTATTTCTCAGTCTACGCCGCACTTACTAGATGAAGATATAA  
ATTACATACATCGTATAACT

>1632

TATTGCCCGCGTACATGGGCTGAGGAATGTTCAAGCAGAAGAAATGGTAGAGTTTTCTT  
CAGGCTTAAAGGTAAATTATAAAATAAGATTTTGGTGTTTTAGGATCTAAGTCTTCTCAG  
TTATTCATTTAGCGATTCAAA

>1633

GGACGTTCCAGTTGGTGAGGAGCTGTTGGGTCGTGTAGTTGATGCCCTTGGTAATGCTA  
TTGATGGAAAGGTAGGTTTAATGTTTCGTTAGATATAGTTGCAGCTTCTAACAAACATCA  
AAACTGATTATGCTTAGGGTTT

>1634

AGGCTGTGGATAGCTTGGTGCCAATTGGTCGTGGTCAGCGTGAACTGATTATTGGTGAC  
CGACAGACTGGGTAAAGACTCAAAAGCATATTAAAAGTTCTAACTAAAATTTGCTCAAT  
GGAAGGATTATATTTTAGTCTT

>1635

TGTATTTATGTTGCTATTGGTCAAAAGAGATCCACTGTTGCCCAGTTGGTGAAGAGACT  
TACAGATGCAGGTATTAAAAGAAATTTAGTCCCATTGCTATTATCTTAAGTCCCATTGCT  
GCTGATTGTAGAATAGCTTCT

>1636

TTCCATGGGAGAGTATTTTAGAGACAATGGCAAACATGCTTTGATCATCTATGACGACT  
TATCCAAACAGGTCAAAGGAAATAAATTTTAGAATCCATTTATTTGTACTGAAGTAA  
AGTTCACATATGCAACTTCTAT

>1637

CATAGAAACACAGGCTGGTGATGTGTCTGCTTACATTCCAACAAATGTCATTTCCATCA  
CTGACGGACAGGTATTATTTAATGATTAAAAGAAATGTAAAAAAGATTTGGATAATTC  
TAAGGCATTGGTTGAGACTAA

>1638

CCCTGCAATTAACGTTGGTCTGTCTGTATCTCGTGTCTGGATCCGCTGCCCAAACCAGGG

CTATGAAGCAGGTAATTTTGCATCACTTTGGCAGTAAGGGGGCTATCATTAGATTAGCAT  
CTTAAGGTATTAATATATTAA

>1639

GATGCTGCCACTCAACAACCTTTTGAGTCGTGGCGTGCGTCTAACTGAGTTGCTGAAGC  
AAGGACAGTATTGTAAGTTGTTCTTTTCTTCATTTGGTCAGGTTCCCTATTGTGTATCAGG  
GTCTTCCCAGGCCTACAGAGCT

>1640

TTACAAAGTTTGAGAATGCTTTCTTGTCTCATGTCGTCAGCCAGCACCAAGCCTTGTTG  
GGCACTATCAGGTATGAATGCAATTGTTGGCATCTTTTTTTAAAGTTATGTTTAAGATAT  
GAAGTTAAAATTATTTTCAA

>1641

CTCACCCCTTCAGCGTCGCTGCCCCAGCTCAGCTCTTACTGCGGGCCGCTCCGACGG  
CGGTCCATCCTGGTAAGTGCTTTTCTCTAGGAGCTAACGTTCCATTTTGCCGCCCCATG  
ACCTTGAGCCGGGGAACGATGGT

>1642

CCAATTCTAAATGCCCTGGAAGTGCAAGGCAGGGAGACCAGACTGGTTTTGGAGGTG  
GCCAGCATTTGGGTAAGTAGAGTTTGTTAGGAATAGTAAAGACCTTGTGTAGCCCAA  
TATCCCCAAAACCAAGCTGTCTGC

>1643

AGACTTTGGGCAGAATCATGAATGTCATTGGAGAACCTATTGATGAAAGAGGTCCCATC  
AAAACCAAACAGTAAGTTGCTCTTATTGCATCTATGCACAAAGGAACCTTCTGTTATTTG  
CAGTTTTACACATTAAGGTGAC

>1644

CAGGAAATTCTGGTGACTGGTATCAAGGTTGTGATCTGCTAGCTCCCTATGCCAAGGG  
TGGCAAAATTGGTATGTTATTAAGGGGTACATATTTCCAAACCTAATATGGGAGGAAA  
AACTCATACAATGTTATGAGTG

>1645

TGAAGGCAATGATTTATACCATGAAATGATTGAATCTGGTGTTATCAACTTAAAAGATGC  
CACCTCTAAGGTAAGCATTGAGCTAATTGATGTCCACGTGGTAGTTACGCCAGGAACT  
ATTGCCAACTGAAGCCATGTT

>1646

AGACCAAGAAGGTCAAGATGTACTGCTATTTATTGATAACATCTTTCGCTTCACCCAGG  
CTGGTTCAGAGGTAAGAGGGAAGGCTTGAGAGGACCTGGTTCATCTGGCCTTTCTTCG  
GATGAGGCTAAGGATGTAGACAC

>1647

GGCCACTGACATGGGTACTATGCAGGAAAGAATTACCACTACCAAGAAGGGATCTATC  
ACCTCTGTACAGGTAAGAAAAATTACATAGATGAAGATCTGATTTGTATAAAGGCAGGG  
TGCAGTGGTGCATCTCAGCTACT

>1648

TATCATGGATCCCAACATTGTTGGCAGTGAGCATTACGATGTTGCCCCTGGGGTGCAAA  
AGATCCTGCAGGTGAGTATATTACTATGTGGGATCAGTGTCCGGAAGTCAAAAAGAG  
GGCCTGTGGGGACTATATGAGGA

>1649

TTCACAGGTCATATGGGGAAGCTGGTACCCCTGAAGGAGACCATCAAAGGATTCCAGC

AGATTTTGGCAGGTGAGATTTTGAGTACAAATCTTGAATGTTTACTGTGCTGTGGTCCC  
ATTCCAACAACCGTCAAGCAATA

>1650

GGCACTTCTGCGGGGGTGCCCTGATCCATGCCCCGCTTCGTGATGACCGCGGCCAGCTG  
CTTCCAAAGCCAGTGAGGGGTCCTGGGGAGGGGGCCTAGGGGGCATTGGGGCTCAGA  
GAAGGGGCTTGGGGGGCTTAGGCAT

>1651

TTCCATCAGCAGCATGAGCGAGAATGGCTACGACCCCCAGCAGAACCTGAACGACCTG  
ATGCTGCTTCAGGTGAGAGGATGGTGCCACCTGTGATCCCAGCACCTCGGGAGGCCGA  
CGTTAGCCAGGGAAACAAGTCCAA

>1652

CCCCGAGGACCAGTGTCGCCCCAACAACGTGTGCACCGGTGTGCTCACCCGCCGCGG  
TGGCATCTGCAATGTGAGTGCTCCCTGTGGCGGGAGGAGGGGTCCTGAGAGGTACTGA  
GCTCTCCGTGGCAGGAGAAAGCAAG

>1653

CAAGGGCACCTTTGCCCACTGAGTGAGCTGCACTGTGACAAGCTGCACGTGGATCCT  
GAGAACTTCAGGGTGAGTCTATGGGACGCTTGATGTTTTCTTTCCCTTCTTTTCTATGG  
TTAAGTTCATGTCATAGGAAGG

>1654

GAAAGTGGAAGACAAGAAGAGCAAACCACGTGTACAACAGAAGGCTGGTCTCCAGA  
GCCAAGGTGCTTCAGTAAGTCAGCTGGATATGTCACTCAATGTTTCAATACTCAAAGAA  
ATTTGTATATAAAAATAGGGGTCCA

>1655

AAGGATGAAGAAGTGGTTCAATGTCTCTCTGATGGATGGTCTTCTCAACCAACCTGTA  
GGAAAGAACATGGTATAAGAATCATTTCTTAACTGAAGATAAGTGCTTATCAAGCTTA  
TATTGAATATATTGAAGCTTATA

>1656

GCTGGAGGAAAGAAGACAGAGGAGGTAGAATGTCTCACATACGGATGGTCTCTCACA  
CCAAAATGTACCAGTAGGTTCTCATTTGGAATAAAATCTACTCTCACTCTGAAAGCTTT  
TTCTCATAGAGAAGTGTATATAAG

>1657

TATCTAAGTGGATCTGATTTAATTCAATGCTATAACTTTGGTTGGTACCCAGAATCTCCT  
GTATGCGAAGGTAAATTTTAAATTTAATACTCGCAAATGCCATGTCTTTATCAGCTTT  
AATCTCTATTAGCTCTGACA

>1658

TTTGAGATCCATGGGTCAGCAGAAATACGTTGTGAAGATGGAAAATCGACAGAACCTC  
CAAAATGCATTGGTTAGTAACACCTTGAAGAAGCTTTGCTAAAATGAAATCTGCATGTG  
TAGCTAAATGGTCAGTTCTCTTT

>1659

TACCTTCTCCATGGATCGAATGAGATAACTTGTAATCGTGGAATGGACACTTCCTCC  
TGAGTGTGTTGGTATGTATGCTACATTTACCATCAGTAGCTAAACTTATGGTGTAATTT  
TTCCATTCTGTTACTTTAATC

>1660

TACTTACTGAGGGGATCAAAAATATCTCGTTGCGAACAAGGAAAATGGTCATCCCCAC

CTGTTTGCTTGGGTAAGAAAGAGAACACATGGAATGTCTACGTTTGTACTTTTATGTGA  
TTTTCTTACAGTGTTTTATATCA

>1661

ACCCCATTTGTCTGAATTATCTGTGCAGTGCAACAGAGGAGAAGTGAAATATCCTTTATG  
TACTAGAAAAGGTAAAATAATAATGTTCTCTGCAAGTATCTTTACTTGACCAATATCTGC  
TACCTCGGTTGAAAATTTATT

>1662

CATTTCTAGAAAGGATCTAGGGAGGCCTATTGTTTAGATGGAATGTGGACTACACCACC  
ATTGTGTTTAGGTATGTACTACTAAATATGCCTCTAACAAAGTAAACTATATATTTTTAA  
TTTGCTGTCATTTTGAGTT

>1663

CTGGATCTATACTTAGAATGCAATGTGACAGAGGGCAGTTAAAATATCCAAGATGTATT  
CCAAGACAAAGGTAAAGAAGTTTTTTTTTTTGGTCAGATTATTTTTTTGGTCAGATTGT  
TATTCAACATTCAGAAATGT

>1664

GAGAAGGAGCTGAAGGAGATCAGGGTCTTGGACAAGGCCTTCGGACCAGAATTGAGA  
GAGGAATTTTCTAGTAAGTAACTTGGGTCATGGGTGTGTGGTTCCATCTTAAACACTG  
CATGTATGTGGGGGGAGATGGACC

>1665

CACACCGCCTGTATCATTGATGTCTTCGGTGTCACTCACAGAGAGTCTATCATGAATGT  
CAATGTGAAAGGTATGGTAGGCTGGGGAGGAGATGCAGCAAGGTGGGGAATTAAGGA  
TCACAAAGAAGGGCCAGGAAGGGA

>1666

GGAGTTTGTCAAGGCCAAGATCGTGTCTCGAGAGGGTGGCAAAGTCACTGCCGAGAC  
TGAGTATGGCAAGGTGGGTGTCAGGCTGATGTGAGAGTCCACCCTGGCCACCTGTACA  
CCTGGGTGGACAGAGAGGGGTACAC

>1667

GCTGACCTTCCTGCATGAGCCCGCGGTGCTCTACAACCTCAAGGATCGCTACGGCTCC  
TGGATGATCTACGTGAGTGCTGCACCTGGCCCTACGTTGGGATCTCTGTTCTTGCTCCA  
TCCATGTCCACCCAGGAGCCAA

>1668

AAGAAGAGGAGCGAGGCCCGCCCCACATCTTCTCCATCTCCGACAACGCCTATCAGT  
ACATGCTGACAGGTGAGAGGCCCTGGAAGGTCTTCTGAAGGGAAGTGGGATAGGCC  
GGGAGGGAGAGGGAGAAGGAAGGGA

>1669

GGTCATCCAGTACTTTGCTGTTATTGCAGCCATTGGGGACCGCAGCAAGAAGGACCAG  
AGCCCGGGCAAGGTAGGCCTGCTGCCCTCCAAGGTCCTGTACCGCAGAAGGGAGGGA  
GAAGAGCTCTCACCTGCCTCCTTCT

>1670

CCAGGCCAACCCCTGCTCTGGAGGCCTTTGGCAATGCCAAGACCGTCCGGAACGACAA  
CTCCTCCCGCTTCGTGAGTGGTCCCTGACCTTGGCCTTGGGACTTGGAAGTGGAGG  
AATGGTCTCAGATATGAGCCTTCCC

>1671

CAGCTGAAAGCAGAGAGAGATTATCACATTTTCTACCAAATCCTGTCTAACAAAAAGC



CTGAGCTGCTGGGTGAGTCAGAGCCACCGACTGAGACCAACTATCTCCATGGCAACCT  
GGTCCCCCTCTGCTTGTGGCTGGAC

>1672

TGCATTCTATCTCCCAAGGAGAGACCACCGTGGCCTCCATTGATGACGCTGAGGAGCTC  
ATGGCCACTGATGTGAGTGTGTGAGGACCCAGCCAGGGGGTGGGAGGATTGGCAGTG  
AGGGGCAAACAGGGGTCCAAAAGCA

>1673

ATGCACTTTTGAAACATGAAGTTCAAGCTGAAGCAGCGGGAGGAGCAGGCGGAGCCA  
GACGGCACTGAAGGTGGGAGGCAGGATTCTTGGGGCAGCTGTAAGTCATGAGGCAGT  
CTGCTCAGCAGTATCTCTCTTCTCTT

>1674

CAAGGGGCTGTGCCACCCTCGGGTGAAAGTGGGCAATGAGTACGTCACCAAGGGGCA  
GAATGTCCAGCAGGTGGGTCCATCTTCAGATGATAATGGGTGGGCAGGGTAGGGAGAC  
TGGCATGGTGGGATGAGAGTTTTCA

>1675

CCTGGAGACCAAGCAGCCACGCCAGTACTTCATAGGAGTCCTGGACATCGCTGGCTTC  
GAGATCTTCGATGTGAGTTGGGACCCCTGGGAGTGGGAGAACAATCACTCACTCGCTC  
CCACATTCAACAGCTATTTGCTTA

>1676

GGAGGGCATCGAGTGGACATTCATTGACTTTGGCATGGACCTGCAGGCCTGCATTGAC  
CTCATCGAGAAGGTGCCTCTTTGGCCTTACCACCTGAATTCTCCCTGCACACCCAACAA  
GAACACCATAGACAAAATAGCAG

>1677

GGCTTGATCAGAAGTCTTCCCTCAAGCTGCTCAGCACCCCTGTTTGCCAACTATGCTGG  
GGCTGATGCGCGTAAGTAGGGACTGAGGCTCCCGGTACAGAGGAGCAGGGATTCTGC  
CAAGGTTCTGAGCCAGGTCAATTG

>1678

ATGACCAACTTGCGCTCCACCCATCCCCACTTTGTACGTTGTATCATCCCTAATGAGAC  
AAAGTCTCCAGGTGAGGCCACAACTAGGGCCAACCCACTGCTGGGCATACACCGCC  
CTGGGAACAGGACCTCCTAGGACA

>1679

TGCTGGAGGGCATCCGCATCTGCAGGAAAGGCTTCCCCAACCGCATCCTCTACGGGGA  
CTTCCGGCAGAGGTGGGTATGAGGGTGCACCAGAGCTCATAGAACAGGGGGAGCCAG  
GCTGCCCTGATGGGAATGGGATCTG

>1680

GAAGGGGGCAGAGAAGCTGCTCAGCTCCCTGGACATTGATCACAACCAGTACAAGTT  
TGGCCACACCAAGGTGAGGAAAGGAGACTAATTAATTAAGGAAGACATCTCTTTTCC  
ATTGACTCCTCTGATGCTTTTCCTG

>1681

TCACGCGTATCCAGGCCCAGTCCCGAGGTGTGCTCGCCAGAATGGAGTACAAAAAGCT  
GCTGGAACGTAGGTGAGAGATCTCAAGAGGAGGTTTCCCGCTTCTCTGAGGCCCAGG  
CTGGTTCAGGGGCAGTGTGAGGAAA

>1682

CAAGGAGCTGGAGGAGAAGATGGTGTCCCTGCTGCAGGAGAAGAATGACCTGCAGCT

CCAAGTGCAGGCGGTGAGGCTCCTGGGCTACTGTTGGCTCTTCCACCCTGCTCTGCCT  
TCACTTCCCACAACCCTGCACCTCC

>1683

AAGGGACATCGATGATCTGGAGCTGACACTGGCCAAAGTGGAGAAGGAGAAACACGC  
AACAGAGAACAAGGTAAGGGCAGCTCCCTTTGGCTCCAGCCCGGGTCTCATCAGGAC  
TCTCAGACCATACTGACCTTGACCCA

>1684

TCAGGCCGAGGAGGACAAGGTCAACACCCTGACTAAGGCCAAAGTCAAGCTGGAGC  
AGCAAGTGGATGATGTGAGTAGATTGAGAGTTGTGGGGCCTAGATATGCCATGTCTATC  
TGTGCCCAGAGCTCTGTGTGTGTGT

>1685

TGAAGCTGACCCAGGAGAGCATCATGGACCTGGAGAATGACAAGCAGCAGCTGGATG  
AGCGGCTGAAAAAGTACTGTGTCCCTCCCTGCTGCCCTTCCTCCTCCCCAGCCCATAA  
CAGTACAAGCAGACCCAAGACAGC

>1686

TCTCAACGCAAGGATTGAGGATGAACAGGCCCTCGGCAGCCAGCTGCAGAAGAAGCT  
CAAGGAGCTTCAGGTGAGGTCTGGACACCCACGCGGGATGCTGAGTCCCTGGGCTGG  
TTCTGTTTCCCTGCCCCCTCCTCTA

>1687

AAGGCGGAGGAGACCCAGCGTTCTGTCAACGACCTCACCAGCCAGCGGGCCAAGTTG  
CAAACCGAGAATGGTGAGCCTAGAGCAGGGGCTCCATGGTCCCACCACAGTCTCCCC  
AACCTCCTGAGCCACTCCAGCCTCG

>1688

GACCCGAGGCAAGCTCACCTACACCCAGCAGCTGGAGGACCTCAAGAGGCAGCTGGA  
GGAGGAGGTAAAGGTAAGGGCTAGACTCGGGCCACCTGGCCCAAGCAAGGAGCACAC  
TGACTAGCCTTGCATCAAATCACTTC

>1689

AGGTGGCCCAGTGAGGAGACCAAGTATGAGACGGACGCCATTAGCGGACTGAGGAGC  
TCGAGGAGGCCAAGTGAGTTCTGAGCAGCCTGACTTCTGGCTGAGGCCCCCTTTCAG  
GCAGGACTCAGCCCAGCCCCAGCCTC

>1690

GATGGTGGACGTAGAGCGCTCCAATGCTGCTGCTGCAGCCCTGGACAAGAAGCAGAG  
GAACTTCGACAAGGTGGGCCCCGGGTGGGGGCCGACGCCAGCATGCAGGGCAAGGG  
GGCATGAGGGGTTCAAGTGAGAGGCCAG

>1691

CTCAAGAACGCCTATGAGGAGTCCCTGGAACATCTGGAGACCTTCAAGCGGGAGAAC  
AAAAACCTGCAGGGTGTGCTGGGGGCCCAAGAGGCTGGGGAGGGGCTGCACTGGCA  
GTGTTCCCATATGGTGCCACCCAAGGG

>1692

GCTGGAGAAGGTCCGAAAGCAGCTGGAGGCCGAGAAGATGGAGCTGCAGTCAGCCC  
TGGAGGAGGCCGAGGTGTGTGTGTGTGCAGGGCACGGGGTGCAGGGAGCTGAGCTCC  
AGGATTTTGGCTCCCTGTTCTCATCCC

>1693

GCTCAGCCACGCCAACCGCATGGCCGCCGAGGCCCAGAAGCAAGTCAAGAGCCTCCA

GAGCTTGTGAAGGTACTCACCCAGAGGGGACTGGCCTCCACGTGGCCTGGCGAAGC  
AGTAGTGTCTTGATACAGGCACCAGA

>1694

GCGGTCCCGGAAGCTGGCGGAGCAGGAGCTGATTGAGACTAGTGAGCGGGTGCAGCT  
GCTGCATTCCCAGGTGAGCAGCTCCCCTGCTCATTCTGAAGGGAGCACAGGCTGGGG  
CTCAGCAAGCAAGGCTTGAGAGCTA

>1695

GACTGAAGTGGAGGAGGCAGTGCAGGAGTGCAGGAATGCTGAGGAGAAGGCCAAGA  
AGGCCATCACGGATGTAAGTCCCCACTCCACCGACCCGATCCAGACCAGTGTCTCTC  
CGTGGGCTGGGCAGCAAGTGTGTGAG

>1696

GAAGCGCAACGCAGAGTCGGTGAAGGGCATGAGGAAGAGCGAGCGGCGCATCAAGG  
AGCTCACCTACCAGGTGCGACGGGCGGTGACTCCAGGCAGAGCCCTGGCACCATAGC  
CACAGTGACAACCAGCTGAGGAGAATG

>1697

GCGGCTGCAGGACCTGGTAGACAAGCTGCAGCTAAAGGTCAAGGCCTACAAGCGCCA  
GGCCGAGGAGGCGGTGAGTGACCTGCTGGGGACTAGGCCAGGGGAGGCATAGGA  
GAGCTCGTCCCCCAAGCCAGGAGTCTG

>1698

GGAGCGGGCGGACATCGCCGAGTCCCAGGTCAACAAGCTGCGGGCCAAGAGCCGTG  
ACATTGGCACGAAGGTGGGTCCCTCTTTTGGGCTTTGCTAGTCACCCCCACAGCAGGC  
ATACCCAGACAGAGCACCCCTCAAACC

>1699

CCTGGGAGGTCGTTCCACCCGCTGGGCAGCCCCGGTTCAGCCTCGGACTTGGAAC  
GTCCGGGTACAGGTGAGAGCGGAGGGCAGCTCAGGGGGATTGGACAGCAGCAATGA  
AAGGGTCCTCACCTGCTGTCCAAGA

>1700

GTGCAAGGGTCTGGCTGCTTTGGGAGGAAGATGGACCGGATCAGCTCCTCCAGTGGC  
CTGGGCTGCAAAGGTAAGCACCCCCTGCCACCCCGCCGCCTTCCCCATTCCAGTGT  
GTGACACTGTTAGAGTCACTTTGGG

>1701

ATCTTAAACCAGCTTGGTGCGGATAGTCTGACTAGTTTAAGGAGACTGGCCGAAGCTC  
TGCCCAAACAATGTGAGTTTCCTAGTAATGGTTTTACCAGGGAATTACTCATTTAGCAG  
CTGATTTCTGATCTCAGGGCTCA

>1702

GATGGTGAGAGGCATGCCTTCATTCTGCAGGACACAAAGGCTCTGCACCAGGTCTTTG  
AACATATGCTGGGTGAGTGAGCTTTGCCCTCCTTGGTGTGGGGAGGATGGTGAGGAGC  
CCGCCAAAGGCCCGTTTTGGGAAC

>1703

CTGCGGGGTGGGGAACATGTCAGCAAACGCCTCTGACCAGGAGAGGACACCCTGGCA  
TGTCATAATTAAGGTACCAGGAAGGAGGGGCAGGGCTTGGATTCCAGAGGTAAAAGC  
GGCCATGGGCCAGACATACTGCAATC

>1704

CAATGGGTCCTGACAGCAGCTCATTGCTTCCGCGATGGCAACGACCACTCCCTGTGGA

GGGTCAATGTGGGTAAGGCAGGGGATGCACCAGCCTCCTGATCCGTGAAGCCACAGAT  
CCTACCACCTCACCCAGCCTCTGG

>1705

TGGAGTTCTATGGTGATGACATAGCTCTGCTGAAGCTGGCCCAGAAAGTAAAGATGTC  
CACCCATGCCAGGTGCCTGGAGTCTTGGATGGGAGGGTGGCCCTGCAGGGAAGAGTGC  
TCTGGAGATCCCTGGAAGAGACTAC

>1706

TGCCTTCCCTGCACGATGGAGGCCAATCTGGCTCTGCGGAGACCTCAAGGCAGCACCT  
GTAGGGACCATGGTGAGTGCTGGGACTTATGGTGCTTGAGAGCTGGGGCCGGGGTTTG  
GGGGTGATAACAAGGACTAGGCTG

>1707

GAGTGTTCCCTGCTCATTTTGTGCGCTTGAATGGGAGCAAACCTGAACATTAACCTTAAGA  
TGGGAGTGGAGGTGAGGGTCTCAGGTTGGGGATGCTGGGATCCCCCTGTGACAGCTC  
CCAGAATGTCTCTCTTCCTTCTCC

>1708

GATGTCAGGGAGGTGGTGACAGACCAGTTCCTATGCAGTGGGACCCAGGAGGATGAG  
AGTCCCTGCAAGGGTGAGTCCCTCACCATGCCTGGATTCCCAAGGGGAAGGCCACCTG  
TGTCTCTGTGGCCAGCATGCATGCC

>1709

GGGTGACAAGCACACCCTGAGCAAGAAGGAGCTGAAGGAGCTGATCCAGAAGGAGC  
TCACCATTGGCTCGGTGAGTGGCCTCCTCCCCAGGACCCCTTTTCCCACCCTTGTCTT  
TGGAAGCAAGGATTAGGGGAGAGAG

>1710

AGGGCAGAAAGTGAAGGGCACCGTCCGCCGTGTGGTCCTGCGAGGGGAGGTTGCCTA  
TATCGATGGGCAGGTACGCAAGTAGCCCCTGCCTGATCTCAGTAGTGCCCTCTTCTGCA  
CCACGTTCATTTCTTCCCTACCCA

>1711

ACGGAAGTGGCCACAGGGGGCTGTTCCCTCAGCTCCCACCCTCAGCCCCTGCCACTAGT  
GAGATGACCACGGTATCCACACTACTGGGCTAGGGGGCTGGGAGGTGTTAGTCTCAGG  
GCAGGATGAACAGCTTGAACATT

>1712

CCAGGGCTTCCTGATGGCCGCTTCCATCTGCCGCCCCGAATCCATCGAGCCTCCGACCC  
AGGTTTGCCAGGTAAGAGTGGGGTTCTGTGACTCAGAGACTGTGTAGGGACAGGAT  
CCACTTCTTCCCAGTGCCTCGCCT

>1713

GACCTCACCCCTGCTGCACTCATTAGTGGGCCAACATATCCTGTCCGTCCAGCAGTTCA  
CCAAGGATCAGGTGCCTGGGGCAGGGAGGATGGGACCACCCAGAGCTTTGAGGATTT  
GGAAAGCTGGGGCTAGGACCTTTC

>1714

TCACCTGTTCAATGTGGCACACACACTGCGTATGATGGTGCAGAAGGAGCGGAGCCTC  
GACATCCTGAAGGTCAGGATCAGGGCCGGGGGTAGGGTCCAGGCCATCGCCTGCCCTT  
GGGCCGCATCAGCCAGGGCCGCGC

>1715

CTCCGTGCAGACCATGAGCTGCTATGCCGACGTCGTGCTCCGGCACCCCCAGCCT

GGAGCAGTGGAGGTGAGGCCAGCCTGGGTACTGAGATGGGGTTAAGAAGGCTGGACC  
CAGGGGCATGAGAACCCTTCTGCCC

>1716

GCACCCACCCAGGCCCTGCTGGACATCTTCACCATCCGTGAGGAGCTGGGAACTGTC  
AATGGCATGACGGTGAGGGTGGTGGCAGGGTTTGGATCCCTGCCAGGGGACGATCTAG  
AGAGGGAGGCAGGAAGTGGTTACC

>1717

CGTGGCACCTCCCAGCCTGCGCATGCCACCCACTGTGCGGGCCTTCGTGGCCTCCCGC  
GGCACCAAGCAGGTGAGACCCTCACAGCCCTGCCTGGAAGCCATGGAGATGTGGGT  
GGGCAGTCAGAGCCCAGCGCTGCAT

>1718

TGACACTGATGTGCTCTACATGACTCGAATCCAGAAGGAACGATTTGGCTCTACCCAG  
GAGTACGAAGCTGTGAGTGCTGGGCTTGAGGAAGAAGCCAGGGGCTGCTGCCGTAGGG  
CATCAGATATGAGGACAGAAAGGCT

>1719

CCCACATCATGACCCGGGCCAAGAAGAAGATGGTGGTGATGCACCCGATGCCCCGTGT  
CAACGAGATAAGGTGGTGCAGCATCAGAGTCAGAGACTGCCTCGGGGCTGGTGGACG  
GGAGGAGACTTAGTCCTGGACAAGC

>1720

GTCAGAGCAGATGTGGAGGGTTCCTGGTGCGAGAAGACTTTGTGCTGACAGCAGCTC  
ATTGCTGGGGAAGGTGAGGAGCTAAGGAACTTCCTGGCCAGCCAGGAACACAGCCCT  
GCGGAGCTCTTCGGTGGAAGAGCCAT

>1721

TGCGCGCAGAGCCATCCGCCACCCTCAATATAATCAGCGGACCATCCAGAATGACATCA  
TGTTATTGCAGGTACCACCTACCTGGCCCTCTGGCTCCTTCCTAGTGTGTCCGGGGACA  
ATGGAGGAGGAAGTGAGGGCAA

>1722

CTTCGGTTCCTACGACCCCCGAAGGCAGATTTGTGTGGGGGACCGGCGGGAACGGAA  
GGCTGCCTTCAAGGTAAGGCATGGGCATTGGCCAACACACCCCGGGAGAGAGGGGCC  
CGTGCAAGCCAGGCAGTGCGAACAG

>1723

GAAGTACAGCACTTTTGGGGAGGCGGCCTCAGCACCTGATGGCCTGGCTGTGGTTGGT  
GTTTTTTTGGAGGTGAGTGGTGGTTTGCTGGGGCCTGGAGGGGCATGGGAGGCCTGCA  
CTGCCCCTAGTTCTAGAACACAGT

>1724

GACTCCCCACTCAGTGAGAGTGTCACCTGGATTGTGCTCCGGGAGCCCATCTGCATC  
TCTGAAAGGCAGGTGAGTCCTCTCAGAGGACCAGATGGAGGGACATGGCACTCAGGG  
CTCACCCAGGCAGTGTGACTCTCC

>1725

CGCGACTTCCTGCGCAAGGAGTACGGGGGCCTGGACGTGCTGGTCAACAACGCGGGC  
ATCGCCTTCAAGGGTATGGGGAGGGGACGTGGCCTCCCCGAAGAAGAACCATGCAC  
TGGGGCTCCTGGCGTCTGCGGGGTCC

>1726

ACGATGAAAACAAATTTCTTTGGTACCCGAGATGTGTGCACAGAATTACTCCCTCTAAT

AAAACCCCAAGGTGAGTCTGATGGGAAACAGCGCACCTTCTCTTTGGGGCTTGATTG  
GCCCCTGCTTGCCTGGGATTCT

>1727

CTCTTCTTCCTCCTCTTCCTCACCCCCATGGAAGTCAGGCCCCGAGGAACCTCTAGTGGT  
GAAGGTGGAAGGTATGTCCAAAGGGCAGAAAGGGAAGGGATTGAGGCTGGAAACTT  
GAGTTGTGGCTGGGTGTCCTTGGCT

>1728

CTGTGCCAGCCGGGGCCCCCTCTGAGAAGGCCTGGCAGCCTGGCTGGACAGTCAAT  
GTGGAGGGCAGCGGTGAGGGCCGGGCTGGGGCAGGGGCAGGAGGAGAGAAGGGAG  
GCCACCATGGACAGAAGAGGTCCGCGGC

>1729

CCTGAGATCTGGGAGGGAGAGCCTCCGTGTGTCCCACCGAGGGACAGCCTGAACCAG  
AGCCTCAGCCAGGGTATGGTGATGACTGGGGAGATGCCGGGAAGCGGGGGTCCAGAG  
ACAGAGGGGAGGGGAAACTGAAGAGG

>1730

GCTGGAAAGTATTATTGTCACCGTGGCAACCTGACCATGTCATTCCACCTGGAGATCAC  
TGCTCGGCCAGGTAGAGTTTCTCTCAACTGGGAGGCATCTGTGTGGGGGTACTGGGAA  
GAAGTGGAAGCCAGTCAATCTTA

>1731

TCAGCTGTGACTTTGGCTTATCTGATCTTCTGCCTGTGTTCCCTTGTGGGCATTCTTCAT  
CTTCAAAGAGGTGAGTCATGTCCCCAGTGGGTCTGTCCAAACCCTACTCCATCTTCCCC  
AGGATAAGCCGGCTCTGGCCA

>1732

CCCCAGGAAGCGGGCCCCAGAACCAGTACGGGAACGTGCTGTCTCTCCCCACACCC  
ACCTCAGGCCTCGGTAAGAGGCAACGCCCCCTCCAGCCTATAGCTCCGCCCCAGATCCG  
GGGCTCCACCCCCACTCTCCTCATC

>1733

TCTTATGGAAACCCGAGCAGCGACGTCCAGGCGGATGGAGCCTTGGGGTCCCGGAGC  
CCGCCGGGAGTGGGTGAATGACTGGGAGAGGGAAGGGTCGTTCCCCACATGGAGGGG  
GTTGGAGCGGTCTGTGGCCCGAATAG

>1734

CCTGACAGTGAGGAGGACTCCGAGTTCTATGAGAACGACTCCAACCTTGGGCAGGAC  
CAGCTCTCCAGGGTAAGGCTGCCCTCCCCCGTGGCCCCCACCTCTGCGGTGGCCTG  
TGGACTCCCATGGACACCCCTCCTT

>1735

AGAGGAATCCTGTATGCAGCCCCCAGCTCCGCTCCATTGCGGGCCAGCCTGGACCCA  
ATCATGAGGAAGGTGGGTGCTTCTGCCGCTGTCCCCTGCTGTCCCCTGGGCTGACTTT  
GCCTTCCAGCCTACTTCCAGTGCC

>1736

GCCAGACCCAGCCTGGGGAGGAGGGGGCCGCATGGGCACCTGGAGCACCAGGTGATC  
CTCAGGTGGCCAGGTGAGCTGGGACTGCCCTAGGGAAAGCGGGGAGGGAGGGAGAT  
AGGCACGGATGGCAGTGGCTGCTGGC

>1737

AGTCTTGCCCCAGCCTCGGGAGGTGGTGGAGTGACCTGGCCCCAGTGCTGCGTCCTTA

TCAGCCGAGCCGGTAAGAGGGTGAGACTTGGTGGGGTAGGGGCCTCAGTGGGCCTGG  
GAATGTGCCTGTGGCTTGAAAAGAC

>1738

GGTCCAGGAGTCCTCCAAGCTCTGCCTGCCACCATCTTCCTCCTCTTCCTGCTGTCTGC  
TGTCTACCTGGGTATGTGGCCAAAGGGCAGGAACTGGCGGGAGGTGGGGGAAGCTGT  
GGAGGCTGCAGAGAGGGGCACAGGC

>1739

TACGTGTGCCGGGTCCAGGAGGGCAACGAGTCATACCAGCAGTCCTGCGGCACCTACC  
TCCGCGTGCGCCGTGAGTGGCCCAGCCCTGGCCCCTACTCCCCTGTCCCGCTGGGGA  
CACTCGGTTTATCTTTGAAGTGGG

>1740

AATCATCACAGCCGAGGGGATCATCCTCCTGTTCTGCGCGGTGGTGCCTGGGACGCTG  
CTGCTGTTCAAGGTGAGCCCCCTCGGACCTCTGAGTCAGCCGGGCGAGGGCCTGGGC  
CCGAGGGACCCCCAATACCCAGGTA

>1741

AAACGATGGCAGAACGAGAAGCTCGGGTTGGATGCCGGGGATGAATATGAAGATGAA  
AACCTTTATGAAGGTGAGTGAAGGGTGGGGATGGGGTAGGGGCAGTTTTGTAGGGGT  
GGGGGTGTTCCCTCTGGGGGTGGCT

>1742

GAGACCATGGAGTCTCCCTCGGCCCCCTCCCCACAGATGGTGCATCCCCTGGCAGAGGC  
TCCTGCTCACAGGTGAAGGGAGGACAACCCCTGGGAGAGGGTGGGAGGAGGGAGCA  
CAGAGACTGGCTGGGGTCTCCTGGGT

>1743

CACCATGGGGCGCCTGCAACTGGTTGTGTTGGGCCTCACCTGCTGCTGGGCAGTGGCG  
AGTGCCGCGAAGGTAAGAGCCCAGCAGAGGGGCAGGTCCTGCTGCTCTCTCGCTCAA  
TCAGATCTGGAAC TTCGGGCCAGGC

>1744

TTCAAGGGCATCCCCTTCGCAGCTCCCACCAAGGCCCTGGAAAATCCTCAGCCACATC  
CTGGCTGGCAAGGTGGGAGTGGGTGGTGCCGGACTGGCCCTGCGGCGGGGCGGGTGA  
GGGCGGCTGCCTTCCTCATGCCAAC

>1745

CAGGACAGCACCTACGGGGATGAAGACTGCCTGTACCTCAACATTTGGGTGCCCCAGG  
GCAGGAAGCAAGGTCTGCCTCCCCTCTACTCCCCAAGGGACCCTCCCATGCAGCCACT  
GCCCCGGGTCTACTCCTGGCTTGA

>1746

ATCGTGGTCACCTTCAACTACCGTGTCGGCCCCCTTGGGTTTCCTCAGCACTGGGGACG  
CCAATCTGCCAGGTGCGTGGTGTCGGCCCTGAGGTGGGCGGACCAGCATGCTGAGCC  
CAGCAGGGAGATTTTCCTCAGCACC

>1747

CTTCGGGGGGGACCCCAACAACATCACGCTCTTCGGGGAGTCTGCTGGAGGTGCCAG  
CGTCTCTCTGCAGGTCTCGGGATCCCTGTGGGGAGGGCCTGCCCCACAGGTTGAGAGG  
AAGCTCAAACGGGAAGGGGAGGGTG

>1748

CATCAGCCAGAGCGGCGTGGCCCTGAGTCCCTGGGTCATCCAGAAAAACCCACTCTTC

TGGGCCAAAAAGGTAAACGGAGGAGGGCAGGGCTGGGCGGGGTGGGGGCTGTCCAC  
ATTTCGTTCTTTATCCTGGACCCCA

>1749

CAGTGTCTGAAGGTTACTGATCCCCGAGCCCTGACGCTGGCCTATAAGGTGCCGCTGG  
CAGGCCTGGAGTGTGAGTAGCCTGCTGGGTTGGCCCATGGGGTCTCGAGGTGGGGGT  
GAGGGGGGTACTGCCAGGGAGTAC

>1750

ACATGGACGGCCACATCTTCGCCAGCATCGACATGCCTGCCATCAACAAGGGCAACAA  
GAAAGTCACGGAGTAAGCAGGGGGCACAGGACTCAGGGGCGACCCGTGCGGGAGGG  
CCGCCGGGAAAGGCACTGGCGAGGGG

>1751

ACTTTGAGACCGATGTCTCTTCCTGGTGCCACCGAGATTGCCCTAGCCCAGCACAG  
AGCCAATGCCAAGTGAGGATCTGGGCAGCGGGTGGCTCCTGGGGGCCTTCCTGGGGT  
GCTGCACCTTCCAGCCGAGGCCTCG

>1752

GCTACCGGCCCCAAGACAGGACAGTCTCTAAGGCCATGATCGCCTACTGGACCAACTT  
TGCCAAAACAGGGTAAGACGTGGGTTGAGTGCAGGGCGGAGGGCCACAGCCGAGAA  
GGCCTCCCACCACGAGGCCTTGTTT

>1753

GATGCGTGACCAGGACAAGAACTGGTGGAGAAGAGCTGCAAGGATGCCCAGGGCT  
GGTTCTTCAGCGTGGTGGGTGGCCGTGTGTAAGCAGGTGTGCACACGTGTGGGCCACA  
TACGCCGTGTGCTGGTGCAGTTGGAA

>1754

CAGAGCGGCAGGATGGAGATGTGGAGCTCTACATCTCTGTGCAGAACCTGAGCCGTCC  
CAGCTCAGCAAGGTAGGGCCCCTGTCCCCTCCCCACCCTGTACCTGTCACCCCAGGGT  
GAGCGCACGCTTATAGACCCCTGC

>1755

TGGACGTGAAGACGCGGCTGGAGCAGGAGATCGCCACCTACAGCCGCTTGCTAGAGG  
TTGAGGACGCCCCGGTGAGTGTGCACCCAGGTACCTGCTGGGGCGGGCTGGGGGCCAC  
TTCACCCAGGGAGAAGTTGGTGTCTG

>1756

AGGAAGGATTAAGGGTGGAGGGAAGGGACAGCCCCTTGTATTGGGAAAAGTTTCAAG  
AATCAGCCCCTGAGTCCCTGTACCTGGTGGCTGGTCCCTGGGAGGGGCCACACATACT  
TTCCAAGGACCACACCTGTTGGGGA

>1757

AGAGGCAGGCCCCGGGGCCGCCCGTGACTACAGCCAGTACTACAGGATAATCGAGGA  
GCTGCAGAACAAGGTAGGGCCTGCTGGTGGGAGGGGTCTCCGGGGGGGCATGACTTTT  
TCCCCCAACTCCTGCCCTGGCCAAA

>1758

CCGTGGACAATGCCAACATCCTGCTACAGAATGACAATGCCCATCTGGCTGCTGCTGA  
CTTCCGCACCAAGTGAGTCCTAGCTGTGGGCTTGGGCAGCCTGGGTCAGCTGGGGGA  
GGATCTCAGGTACCCCTCCTGACCC

>1759

GCGACCCGGAGATGCACATTGAGAACCTCAAGGAGGAGCTGGCCTACCTGAAGAAGA



ACCACGAGGTGAGGTGGCTGGGGCAGAAGGTCAAAGATGCTGAGGAGTGGGTGCAG  
AGCCCTGGGGTTGGGCCATGGCTGAGG  
>1760  
GATGCGTGAGCAGTATGAGAAGATGGCAGAGAAGAACCGCAAGGATGCCGAGGATTG  
GTTCTTCAGCAAGGTGGGAGCTGCTGCAGGCCAGAGGTCTCTCTTCGGGGCTGGGCTC  
AGGGGCCTTAGCACTGACAGTAGGC  
>1761  
TGGACATGAAGATGCGGCTGGAGCTGGAGATCACCACCTACCACCGCCTGCTGGAGG  
GCGAGGATGCCCAGTGAGTGGGGGAGCCTGGGGTCAGGGCTGGGGGCCTCTTGGCAG  
GGGTGGGGCTCTCAGACTCACATCTA  
>1762  
CCTCAAAATTTTGTGGTGGTTTCCTTATAAGACGGAACCTTTGTGCTGACGGCTGCTCAT  
TGTGCAGGAAGGTGAGACAACAGGGTCTATTTATCTCCAAATGGGAGATGAACAACCA  
GAGTAGCATCCAGGAATACACCT  
>1763  
CCTCAAAATTTTGTGGTGGTTTCCTTATAAGACGGAACCTTTGTGCTGACGGCTGCTCAT  
TGTGCAGGAAGGTGAGACAACAGGGTCTATTTATCTCCAAATGGGAGATGAACAACCA  
GGTAGCATCCAGGATACACCTGC  
>1764  
GGTTATAAAGCAATTCCGTCATCCAAAATATAACACTTCTACTCTTCACCACGATATCAT  
GTTACTAAAGGTGACAACACCTCTCTTCTCCCTTTCCACTTCCCATTCTCCTAAGCTTCT  
CCTTCAGGTCCTCATTGCCC  
>1765  
AGCGTAGCCGCCACGCTACGCCCTGGACTGAGGAACCGCGACACCTCACCACGGAG  
GCCCAGGCTGCGGGTGAGCTTGCTCCCGCCCCCTACCTCCTGGCTTTGCTGTCCTGGAG  
GCCTGTGGTAGAACCTGTGGCCTGG  
>1766  
TCTTGGTCAGCGTCCCCATCACTCTGGCCCTGGCTGCCGCTGCCGCCACTGCCAGCAG  
TCTCTTGATCTGGTAGGTTGAGTGAGGCTGGGTGGCAGAGGGAGCCTGAGGGAACCC  
CCACTCCAGCCCCCTCCCTGACAGG  
>1767  
GCTCCCCAGTCGCTGGTGCTGCTGACGCTGCTCGTCGCCGCTGTCCTTCGGTGTCAGG  
GCCAGGATGTCCGTAAGTCTTCCCCCGCCGCTGCCTGCCTGCCTGCTTTCCATGCGTCC  
CTCAGCATCCTTCTCCCCGGCCC  
>1768  
TGCCTCAGCCCTGAGATCCCCTTCGGAGAGTGCTGCCCCATCTGCCCAACTGACCTCG  
CCACTGCCAGTG GTTGTAAATTTATTTATTTCTGTTCAACATAAATAAATTACTTGCAAG  
CACTGCAAACACGCTCCCATAG  
>1769  
ACCTGGGACCCCTGGAAATCCTGGCCCCCCTGGTCCTCCCGGCCCCCCTGGTCCCCCT  
GGTCTTGGTGGAGTAAGTATCCTTACTTCCCATTCCTTCAGGCTGTCCCTCCAGAAATG  
TGGCTTTTAAATTGCTGCTTGCA  
>1770  
TGCCCAGATGGCTGGAGGATTTGATGAAAAGGCTGGTGGCGCCCAGTTGGGAGTAATG

CAAGGACCAATGGTAAGAAAAGACACTAGTTCTTTGCAGCCAAAATGGCAGGAGGTG  
GCCCTTAGCAGAGCCAGAGAGTCTG

>1771

TCCTGAAGGTGCTCAAGGTCTCGCGGTGAACCTGGTACTCCTGGGTCCCCTGGGCCT  
GCTGGTGCCTCCGTAAGTGCAGCTTCTCTTTGGCCTGGGGGGGTCTGGGGTCTGTGGC  
TTTGGAACCTTGACTCTGTACTT

>1772

CTTCCCTGGGCCACGGGGTCTCCTGGCCCTCAAGGTGCAACTGGTCTCTGGGCCCCG  
AAAGGTCAGACGGTAAGAGCCCCAAAGTGACCCCCAAGTTCCACTGACATCTCTGGAG  
TCAAACCCCATCACCCCTCTTTCCC

>1773

TGAAGAAGGCAAGAGAGGTGCCCCGTGGAGAGCCTGGTGGCGTTGGGCCCATCGGTCC  
CCCTGGAGAAAGAGTTAAGTGAATGTGGAGGCTCCATCCCATGGGGCCTGTGACCTCG  
AGAGGGAAGTGGAGTCCTTGTGGTC

>1774

TCTTGCTGGCCCCAAGGGAGCCAACGGTGACCCTGGCCGTCCTGGAGAACCTGGCCT  
TCCTGGAGCCCCGGGTAAGTAGCAGAGCTGCTGTTGCCCTTGCTTCAGACCCTCAGGC  
CCTTCCTGGCTGGCTCCTTCCAGCC

>1775

ACCTCCAGGTCTCAGGGGGCTCGTGGGCAGCCTGGTGTATGGGTTTCCCTGGCCCC  
AAAGGTGCCAACGTAAGTAATAATTTGCTCTTCTATTTCCCTCCATGTGGTGCTACCTAC  
CTCCCTGCCCTCTTGGGGAAAG

>1776

CTCTCCCGGTGCCCAGGGCCTCCAGGGTCCCCGTGGCCTCCCCGGCACTCCTGGCACT  
GATGGTCCCAAAGTAAGTGAGGCTGCATCCAGTAGGGGTCTTCGTGGTAGCCTGGAGT  
CCCACTGAGCAGGAGAGAGGAGCG

>1777

CCCTCCAGGTCTTCAGGGAATGCCTGGCGAGAGGGGAGCAGCTGGTATCGCTGGGCCC  
AAAGGCGACAGGGTAAGTACTGAGGTTACAGCCTCCTCACCAAAGCTGTGGCTTTGCC  
AATGTCCTGCCCCTTGTGATCGCT

>1778

AGAGGCCGGCCAGAAAGGCGATGCTGGTGCCCCTGGTCCTCAGGGCCCCCTCTGGAGC  
ACCTGGGCCTCAGGTGGGTAACGCTGCACTCCAAGAATTGTTCCCTCAAGGAAGGGCT  
CCTGGCGTGACAGATGGGAAGGCCCC

>1779

TGAACCCGGCCTCCAAGGTCTTGCTGGACCCCCTGGCGAGAAGGGAGAGCCTGGAGA  
TGACGGTCCCTCTGTAAGTCCCTCACCAGGCCCATGCCAAGGTCCCTGGGAGCAGGGT  
CGTGAGTGGCTTCTGAGCTCACAGA

>1780

TCAGAGAGGCATCGTCGGTCTGCCTGGGCAACGTGGTGAGAGAGGATTCCCTGGCTTG  
CCTGGCCCATCGGTGAGTGTGGGGTATCCCTCCCTCCATCCAAGCTGGCCCTGCCTGCC  
AAGGCTTCTACCTCCCTCAGCAC

>1781

AGACAGAGGTCCTCCTGGCCCCGTGGGTCTCCTGGCCTGACGGGTCTGCAGGTGA

ACCCGGACGAGAGGTGAGCAGTGAGACCCCTGGGGTGGCCCTGATTGGGGAGAGG  
GGCCCTGTGAGTCTCTGTGCTGGGTCA

>1782

AGCCCTGGGCCCCCTGGCTCCCCTGGCCCCGCTGGTCCAACCTGGCAAGCAAGGAGA  
CAGAGGAGAAGCTGTAAGTATCCTGGAATTCAGTAAAAGCCGCCTTCCCCTGCGCGGT  
GGGGCTGAGGCAGTCCCTGGGTTC

>1783

AGAGCCTGGCGAGAGAGGCCTGAAGGGACACCGTGGCTTCACTGGTCTGCAGGGTCT  
GCCCCGCCCTCCTGTGAGTGTCACTGCCTGCGTGGGACTTCCCGAGGCCTCCTGCCAC  
ACAGAGCCCACTTGAGCTCCCTGTG

>1784

TGCTAATGGAATCCCTGGCCCCATTGGGCCTCCTGGTCCCCGTGGACGATCAGGCGAA  
ACCGGTCCTGCTGTAAGTGTCTGACTCCTTCCCTGCTGTCGAGGTGTCCCTACCATCC  
GGGAGGCTTGAGCTCTTTTTTGC

>1785

GAGGGCTCCCGCAAGAACCCTGCTCGCACCTGCAGAGACCTGAAACTCTGCCACCCT  
GAGTGGAAGAGTGGTAAGCTTGAGAAACAGGATCCCCTGCCCCGGGAAGCAGGGAGT  
CATCCCTTAGGCCTAGCAGCAAGGGA

>1786

CTGGTGGAGCAGCAAGAGCAAGGAGAAGAAACACATCTGGTTTGGAGAAACCATCAA  
TGGTGGCTTCCATGTGAGTACCTGGGTGCCCTAGATGATGAGCAGAGATGGCTCCTCA  
AACTCTTTCTTTTCTTTCTCCCTGG

>1787

CAATGACGTGGAGATCCGGGCAGAGGGCAATAGCAGGTTACGTACACTGCCCTGAA  
GGATGGCTGCACGGTGAGTGGGGCTGCCAGAGAGAAGAGCTGCCTGTGCCCAAACCTG  
CCTGGAGCAGGGCTGAGGGTTGGCCC

>1788

CTGGTGGCCGCGCTCTGCGCCGGGATCCTGGCAGAGGCGCCCCGAGTGCGAGCCCAG  
CACAGGGAGAGAGGTGGGCACCGCAAGGGAGGACCCGGCCCGGGGCACTGCACCGT  
GCCACCCTCCGCTCCACTCGGCCTTCA

>1789

TGCCTTTCTCTGGAGCAGCCAGTGCACAGGGTGTGCGCTTTGCCACAGTGCAGTACAG  
CGATGACCCACGGTGAGTAGGGGGCCCTGGGGGCTGGGGACCACGAGATCCCCACCAA  
GACTCCTTCCCCAGAGAGGGAGGAG

>1790

AGGGGCTGCAATTCTCCATGTGGCTGACCATGTCTTCCTGCCCCAGCTGGCCCGACCT  
GGTGTCCCCAAGGTGATCCCTACCCCTACCATGCCTCCCAAGATGACCCCAAATGAAG  
TGTCCAGGGGAACCGTGATTTGAC

>1791

AAGTCCCAGGACCTGGTGGACACAGCTGCCCAAAGGCTGAAGGGGCAGGGGGTCAA  
GCTATTTGCTGTGGGTAAAGACCGAGCAGGAGTGACAGGTCAGCTGGGGGGTGGGGG  
CAGTCAGAGAGCATGTGGGTGACTGAG

>1792

AGGACACTACTGCCCCCTCGTTTCCCGGAGAGTGTCACGACTGCTGGTGGCGTGCCCTG

TGACCCGACCTCGTGAGTTCCTGCCCACACGGTGTACCCTGACCTAGACCCCGGACCC  
CAATCCCCACTTGGCAGTGCTGAT

>1793

GACTGGCTACAAGGTCCAGTACACTCCTCTGACGGGGCTGGGACAGCCACTGCCGAG  
TGAGCGGCAGGAGGTAGGATGTCAGGAGTATAGGTGGTGGCTGGGGACTTGGCTGGG  
CAAGATAAAGTGACCTCTTGCCCTGG

>1794

TACCAAGTGACTGTGATTGCCCTCTACGCCAACAGCATCGGGGAGGCTGTGAGCGGGA  
CAGCTCGGACCAGTGAGCAATTCTGCCAGCCTCTGACCCCATTCACCTAACCCCCGAC  
CCCAGTACCCCTCCCACTTCTGA

>1795

AGCCTCCTGGTGGCCTGGCGGAGTGTGCCAGGTGCCACTGGCTACCGTGTGACATGGC  
GGGTCTCAGTGGTGAGTGTGAGAGATGTGGCTGAGGGAGTCCCCGCGCCTCAGACAAG  
GCTGTAGAGTCCTGAGTCTGCAAGC

>1796

TATGAGGTGACCGTGAGCACCCCTATTTGGCCGCAGTGTGGGGCCCGCCACTTCCCTGA  
TGGCTCGCACTGGTGAGAAGGCTGGGCACCTTCTTCAGGCTGGGACGGGCAGGCAGG  
GCAAGGCCCGGAGGCCACTGACATC

>1797

TCCATCCTCCTTTCCTGGAAGTGGTGCCTGAGGCCCCGTGGCTACCGGTTGGAATGGCG  
GCGTGAGACTGGTCAAGTGCAGGGGGAAGGGATGGACAGGCAAGGGTCAGGGCATGGC  
CTCTGCTGGTCTGACCCTGTTATCT

>1798

TACCGCCTCACACTCTACACTCTGCTGGAGGGCCACGAGGTGGCCACCCCTGCAACCG  
TGGTTCCCACTGGTGAGGGCTCTGTGGGCTGGGCCAGTGAGTGGGGGAGGTGTCGGA  
GCCCCAGGCTGCCTCTATGCTGTGC

>1799

CGGGTGCGAGTGTCTGGAGCCCAGTCCCTGGTGCCACCCAGTACCGCATCATTGTGC  
GCAGCACCCAGGGTGAGGTGGACGCAGCCAGCACCCCCACCACACAACTGAAGTTC  
CAGCCTGAGGGGTCTGAGTGTACCT

>1800

TACACTGTGCGGGTGTCTGCTCGAGTGGGTCCCCGTGAGGGCAGTGCCAGTGTCTCTCA  
CTGTCCGCCGGGGTGAGTACTGCAGGAGGCTTGTGGAGGACAGCCTGCCTGCCTCACT  
CTGGTCCTGGTTCTGACTTCTGAC

>1801

CGAGTGAGGGTGGCCTGGGGACCCGTCCCTGGAGCCAGTGGATTTCGGATTAGCTGGA  
GCACAGGCAGTGGTCAGTGTGGGGTGTGTGGGGGGACTGCCAAAGGGACCAATGAG  
GGTATGGGTGCCAGAGGGGACAGGCA

>1802

TACCAGGTGGCTGTGTCCGTACTGCGAGGCAGAGAGGAGGGCCCTGCTGCAGTCATC  
GTGGCTCGAACGGGTGAGGCCCTGCCCCCGTCCCTTGGCTCTCTGCCTCCATTGCTCTT  
TCAGACCCCATGCCTTCCCTTGC

>1803

TCTGTACCATACCTGGACCAGGGTTCCTGGCGCCACAGGATACAGGGTTTCCTGGC

ACTCAGCCACGGTGGGGACTGGGGTTTGGGAGGGGGCAGGTCAGGGTGGAATGGG  
GGCTGGGGGTTTATTGGGGGTTTCAGG  
>1804  
TATACGGTGCATGTGAGGGCCCATGTGGCTGGCGTGGATGGGCCCCCTGCCTCTGTGGT  
TGTGAGGACTGGTGAGTGGACCCTGGCCAGCTACTAGCCACACCGCATTAGCTACCCT  
GCCCTGCTGTGTGTTTCCTGATTG  
>1805  
GTTCTACGGATCACCTGGGTAGGGGTCACTGGAGCCACAGCTTACAGACTGGCCTGGG  
GCCGGAGTGAAGGTATGGCTCCCTGACGCCACCCCTGTCCTTCCTGGCTGGGACTGCT  
CACCCCTAACCATTGCTGTATGCC  
>1806  
TACTCAGTGCAGTGACTGCACTTGTCTGGGGACCGCGAGGGCACACCTGTCTCCATTG  
TTGTCACTACGCGTAGGCAGAGCATGCGCTGGAGAGCTTCGGATGGGTGGTGTGGATG  
GTTTGGGGATCCGGGCTTGTGCTC  
>1807  
CACTCGCTGAGGCTGCGCTGGGAGCCGGTGCCCAGAGAGCAGGGCTTCCTTCTGCAC  
TGGCAACCTGAGGGTGAGAGTGTCCCCAGAGAAGTTAGGACCATTGGGGCAGGCTGT  
GGCAGACTCCGCAAGGTAGGCGAGAC  
>1808  
TACCGCGTGAGGCTGAGTGTCTAGGGCCAGCTGGAGAAGGGCCCTCTGCAGAGGTG  
ACTGCGCGCACTGGTAAGCCTCACCTTGGCGTGCTCCTCCCCTGCTGATGACCCACCC  
TGACTTCCTGCACCCCGACTCTGAG  
>1809  
GCCTGGACTCCAGTGTCCAGGGCATCCAGCTACATCCTATCCTGGCGGGCCACTCAGAG  
GCCCTGGCCAGGGTGAGGGGGAGGCCAGGATTTGGGTGGGCTGGCAGTTGGGGCTCT  
GTGGAGACAGCTTTTAAATCAAGTT  
>1810  
TACATCTTCTCCCTGACGCCTGTCCTGGATGGTGTGCGGGGTCCTGAGGCATCTGTCAC  
ACAGACGCCAGGTATAGTGGGCATAGTGGGAAGGGCAGAAAGGTGTGTCTGGGTGGG  
CTGCCCCGCTTCAGTAACTTGTTC  
>1811  
GGAGGCTACGAGGAGGGTCCTGGAGCGTCTGGTGTGTCGCACTTGGGCCTCTTGGGCC  
ACAGGCAGTTCAGGTTTGGCCCTGGGGCAGCCAGATTCTACCTCTCCCTGAGGGCCCC  
CACCCAGGCTCCATACCAGTTACCA  
>1812  
CATGACCTTGGCATTATCTTGCAAAGGATCCGTGACATGCCCTACATGGACCCAAGTGG  
GAACAACCTGGGTGAGGACTGCAGCAGGCATGGACTCCTGGGGCTATCCACTGGGAG  
CTTGGTGCCCCAGGGTTCTGACAT  
>1813  
ATGTTTCTGCTAGTGGATGAACCCTTGAGAGGTGACATATTCAGCCCCATCCGTGAGGC  
CCAGGCTTCTGGTAAGGAGTAGGCTGATGGGGAAGGGTCTGGGAATAGGGGTGGCC  
CTGAAAAGGCTATCATGCAGCCAC  
>1814  
TGGGCCAAGCCTGGACCAGGCAGTCAGTGGTCTGGCCACAGCCCTGTGTCAGGCATC

CTTCACTACTCAGGTTTGGGAAGAGGCCTCTGGGGGACTGGGTGGTAGAATATAAGGGG  
TCTGGGGGTTCTTGGTAGAAATGTT

>1815

AGCAGATGGGCGTCCAGGCAGCCCTGGCCGCGCCGGGAATCCTGGGACCCCTGGAGC  
CCCTGGCCTAAAGGTGAGCAAGCCTTGTCTCCTGCAGGTCAGGGTGGGCGCTGCTGAGT  
GGGTGGGGTGGCTCCGACTGTTCTGC

>1816

GGCTCCCGGACAAGTCATCGGAGGTGAAGGACCTGGGCTTCCTGGGCGGAAAGGGGA  
CCCTGGACCATCGGTAAGTGCAGGGTATGTGGAGGCAAGTGATGTGTAGTGGGGGGAC  
CAACACCAGGGGGGCGAGAGTGAGG

>1817

TGGACCTCGTGGACCACTGGGGGACCCAGGACCCCGTGGCCCCCAGGGCTTCCTGG  
AACAGCCATGAAGGTGACAGCCTCATGAGTGCCATGTGATGCGGAGACCTGGTGACCC  
CATTTGAACCCACATAACCCCTGCC

>1818

GCCTCCTGGAGAGAAGGGAGACCCTGGGCGGCCTGGCCCCCAGGACCTGTTGGCCC  
CCGAGGACGAGATGTAAGAGGCTGGAGTCGGGGGAGTCATGGCGGGTAAGGGAGTAG  
GGCTGTTGCCAGCATCATGGGGGTTC

>1819

GGCACCTGGAGTTCGGGGGCCTGTGGGTGAAAAGGGAGACCAGGGAGATCCTGGAG  
AGGATGGACGAAATGTGAGTCCCAGCCTATGACTCCTCACCCCAACCTTAACCCTCCA  
ACCAGCCAATTCCCAATACCTGATCC

>1820

GGACCGCGGACAAGAGGGTCCTCGAGGGCCCAAGGGTGATCCTGGCCTCCCTGGAGC  
CCCTGGGGAAAGGGTGAGTGTGATTGGTCCTCGGGGGTGCAGGCATGGGAGGGCCTG  
CTCTGATTTCTTCCTCCCTATCCTC

>1821

TCCCCCTGGGCTGGATGGCCGGAGCGGACTGGATGGGAAACCAGGAGCCGCTGGGCC  
CTCTGGGCCGAATGTGAGTCTTGGTAGTCCTGCCTGGTTGTCCCCTTCCCCTACCCCTT  
CACATGAGGACCCTAGACCCCAGC

>1822

TGGAGCTCCTGGTATCCTTGGACCCAGGGGCCTCCAGGCCTCCCAGGGCCAGTGGGC  
CCTCCTGGCCAGGTGAGTGTCTTGGGTCACTTCTGGGACTTCAGAGCATTAGAAGCCAT  
GATGTTTCAATGGGCAACCTCCT

>1823

CCTGCCTGTGCCCCGAACGGCGTCGAGGCCCAAGGGGGACTCAGGCGAACAGGGCCC  
CCCAGGCAAGGAGGTGAGCAGAAGTGGCTCAGTGGGTGTGCCCCGTGGAGTGGGGT  
GTAGCTGTACAGCCACCAGCATTCTC

>1824

AAAGCCTGGTATTCCCGGGCTCCCAGGCAGGGCTGGGGGTGTGGGAGAGGCAGGAAG  
GCCAGGAGAGAGGGTGAGGCTGGGGGCTGGCCAGGAGAGTGAGGGAAGAGGGGTTG  
GGAGGGGTGGGACCCCCCATGGGCTTG

>1825

GAAGCCGGGAGCCCCAGGTCGAGATGGTGCCAGTGGAAGATGGAGACAGAGGGA

GCCCTGGTGTGCCAGTATGTGTTCTGGGGGCAGCTCGCTAGGGTGTGGTGCCCAGCTG  
TGGGCCTGAAATATGAGGAGTGGGGC  
>1826  
TGTTGTTGGGTTCCCGGGTCAGACAGGCCCTCGAGGAGAGATGGGTGAGCCAGGCCCT  
AGTGGAGAGCGGGTGAGGGGCTGGGAACAGCATGTAGGGGCATGGTGAATCCATGGT  
GGGTGAGGAGGGGGCCCTGCCTTG  
>1827  
TCTGGCAGGCCCCCAGGGAGAGAAGGAATCCCAGGACCCCTGGGGCCACCTGGACC  
ACCGGGGTGAGTGGTGAGTAGAGGTCCCTAAACCCACGTATTTGATTTCTGTCTCG  
TGAGGACTTAGGATGGGGCGGGCC  
>1828  
TGAACGAGGGCCTCGGGGCTTGGATGGTGACAAAGGACCTCGGGGAGACAATGGGGA  
CCCTGGTGACAAGGTACAGGGAAGAGGGTGGTGTACTCTCTGTGGGGTCTGTGGCT  
GTGGTGGTTCCACAGCTACTGTGAGG  
>1829  
AAAGGATGGAGTGCCTGGTATCCGAGGAGAAAAAGGAGATGTTGGCTTCATGGGTCCC  
CGGGGCCTCAAGGTAGGAAAGAAACAAGATTGGTTTTTTCTGGTCAGGAAGGCCTAA  
TGTTGAAGGGCGAGGGACCTGGGG  
>1830  
CTCTGCTGGTCCCCCAGGGCCACCTGGCAGTGTGGTCCCAGAGGCCCCGAAGGACTT  
CAGGGCCAGAAGGTAAGGGGCCCCAGCTCTGACTCCTGATCCCTGAACCTTCCCTACC  
CTTCCAACCTCATAACCATCTTCC  
>1831  
AGGTCCCCCGGAGAGAGAGTGGTGGGGGCTCCTGGGGTCCCTGGAGCTCCTGGCGA  
GAGAGGGGAGCAGGTGAGTAGGGATTCCAAGGCTTGGGTGAGAGATCGGGGTGACTT  
CTGTTGTCCCTGAGGTCAGAGGTCAC  
>1832  
GCTGCAGACACTGCCGGCTCCCAGCTCCATGCTGTGCCTGTGCTCCGCGTCTCTCATGC  
AGAGGAGGAAGGTGAGGACAGCTGAACCCGTGGGGCAGCTATGGGTGGGGCCGAGA  
CACGCACATGGGTGTCCATGAATGC  
>1833  
GAGTACTCTGAATACTCCGAGTATTCTGTGGAGGAGTACCAGGACCCTGAAGCTCCTT  
GGGATAGTGATGGTGAGAATGGGGGGCTGCGCAGCGGGGTCTGGGGAGGGGCAGGCA  
GGGCTGAGCCCTGCTGACCTCCCC  
>1834  
AACCGTTTTGGGACCCGTGAGGCCTGCGAGCGCCGCTGCCCACCCCGGGTGGTCCAG  
AGCCAGGGGACAGGTATGGGCTGAGCCCCACCGTGGGGAAGTGGGCACTGAGCCTG  
CCTGGATCGGGTTCTGGGGGAGGAGT  
>1835  
GATCCTCCTGCTTGTCGCCCTCTCTGTGGCCTATGCAGCTCCTGGCCCCCGGGGGATCA  
TTATCAACCTGGTAAGAGGGTCTTCAGGGGAGGCGCCTCCTGAGTCCCCAGATGAAGA  
CTTCCTAAGCTTGGACCTTGACC  
>1836  
GCATTCAAGTGCGCTGGGCCTGGCCCGCTGCACATCCATGGCCAGCGAGAACAGCGA

GTGCTCTGTCAAGGTGGGTGCCTGAGGACTTGGCGTGGGTGGGGGAGAATGGGGAGT  
AGGGCCCTGAACACTTGTGAGTGGGA

>1837

CTGGCCGCGCAGGCCCTGAGGGCTCGCGGCCCCAGTGGCGCGGCCGCGATGCGCTCC  
ATGGCATCTGGAGGTACTCGGGTCTCCGGGCGTGCCAGGGACCAGAGTGTTGCCCTCC  
CAGGGTGGTCCCAGGGCGGCAAAGC

>1838

TGTTCCCACTGATGAAGAGCAGGCGACTGGGTTGGAGAGGGAGATCATGCTGGCTGC  
AAAGAAGGGACTGGTAAGAGAAACTCCCTTCTGTCTTCTGTGTAACCTATGGCCTTG  
ATGTGTTTCATAGTGGTCTCCTCTCT

>1839

GCTTCAGGCACCAGGGAAGACCCTAATTTAGTCCCCTCCATCTCCAACAAGAGAATAG  
TAGGCTGCATCTGTAAGTACCTCACCTCTATTTTTATCCACTTGCTTAATATATCCTACA  
ATAGTGTGTAAGCTGCCTCAA

>1840

CTCCCAATCTATCTGCTTGGCCTGACTCAGAAATTCGGGCCCATCTACAGGCTCCACCT  
TGGGCTGCAAGGTGAGAGGCTGATCTCGCTCTGGCCCTCACCATAGGAGGGGGCGGA  
GGTGACGGAGAGGGTCCTCTCTCC

>1841

AAGAGGACCATTGAGGAAGCCATGGTCAAAAAGTGGGCAGACTTTGCTGGCAGACCT  
GAGCCACTTACCTGTAAGGGCTGGGGGCATTTTTCTTTCTTAAAAAATTTTTTTTAA  
GAGATGGGTTCTTGCTATGCTGC

>1842

AGCCCTGCTGCTGGGCATCCGTGACTCCATGGAGCCAGTGGTGGAGCAGCTGACCCA  
GGAGTTCTGTGAGGTAAGGCTGGGCTCCTGAGGCCACCTCGGGTCAGCCTTGCCCTCTC  
ACAGTAGCCCCCGCCCTGCCCGCTG

>1843

TCTCCGGAGGCTGAAGCAGGCCATAGAGAAGAGGGATCACATCGTGGAGATGCAGCT  
GAGGCAGCACAAGGTGGGGACTGTACGTGGACGGCCTCCCCTCGGCCACAGCCAGT  
GATGCTACCGGCCTCAGCATTGCTAT

>1844

AAGAGGACCATTGAGGAAGCCATGGTCAAAAAGTGGGCAGACTTTGCTGGCAGACCT  
GAGCCACTTACCTGTAAGGGCCGGGGGCATTTTTCTTTCTTAAACAAATTTTTTTTTTG  
TTAGAGATGGGGTCTTGCTATGT

>1845

AGCCCTGCTGCTGGGCATCCGTGACTCCATGGAGCCAGTGGTGGAGCAGCTGACCCA  
GGAGTTCTGTGAGGTAAGGCTGGGCTCCTGAGGCCACCTCGGGTCAGCCTCACCTCTC  
ACAGTAGCCCCCGCCCTGCCCGCTG

>1846

CCATTGAGGAGGAATTCTCTCTCCTCACCTGCAGCATCAATGTTACCTCACCTTCGGAG  
ACAAGATCAAGGTGCCTCACAGCCCCCTCAGGCCCACCCCCAGCCCCCTCCTGAGCCTC  
TCCTTGTCTGAACTGAAAGTAC

>1847

GTATCCAGGAGGTGTTAAAAACCTGGAGCCACTGGTCCATCCAAATTGTGGACAGATT



CCCTTTCTCAGGGTGAGGACCTGGAGCCTAGACACCCCTGGGTGTGGGGGAGAGGC  
TGGGGTGGAGGGAGAGGCTCCTTCC

>1848

AGGTCTCCGGAGGCTGAAGCAGGCCATAGAGAAGAGGGACCACAAGAGAGAACAGC  
TGAGGCAGCACAAGGTGGGGACTGTGTGTGGACGGCCTCCCCTCGGCCCACAGCCAG  
TGATGCTACCGGCCTCAGCATTGCTAT

>1849

GATCGGTGGCACTGAGACCACAGCAAACACCCTCTCCTGGGCCGTGGTTTTTTTTGCTT  
CACCACCCTGAGGTGCGTCCTGCGGACAAGCAAAAGGCTCCTTCCCAGCAACCTGGC  
CAGGGCGGTGGCCACCCTCACTCAG

>1850

CACCACAGAGATTAACCTCAAGGTTGGGGAGGAGTTTGAGGAGCAGACTGTGGATGG  
GAGGCCCTGTAAGGTGAGTGCCAGAAGGGGCTCCAGGGTCATGGCGTCATTGCCCTGC  
CTCTCAACCTGCCATTTTCCAGGCT

>1851

GCTCCTGAAGGGAGAGGGCCCCAAGACCTCGTGGACCAGAGAACTGACCAACGATGG  
GGAAGTATCCTGGTAAGTCCTGCCTCCTCCCCACTAATAGCAAACCCAGTGCTACCTT  
CCAAGATTCTCTGGGAGACCCAG

>1852

GACGTGACCATGGAGAAGCTGTTGTGTTTCTTGGTCTTGACCAGCCTCTCTCATGCTTT  
TGGCCAGACAGGTAAGGGCCACCCAGGCTATGGGAGAGTTTTGATCTGAGGTATGGG  
GGTGGGGTCTAAGACTGCATGAA

>1853

GCTTTTTGACCACGCTATGCTCCAAGCCCATCGCGCGCACCAGCTGGCCATTGACACCT  
ACCAGGAGTTTGTAAGTTCTTGGGGAATGGGTGCGGGTCAGGGGTGGCAAGAAGGGG  
TGACTTTCCCCCACTGGGGAAGTA

>1854

CCAGACCTCCTTCTGCTTCTCAGACTCTATTCCGACACCCTCCAACATGGAGGAAACG  
CAACAGAAATCCGTGAGTGGATGCCGTCTCCCCTAGGCGGGGATGGGGAGACCTGTG  
GTCAGGGGCTCCCGGGCAGCACAGCC

>1855

TGACACCTCGGACAGCGATGACTATCACCTCCTAAAGGACCTAGAGGAAGGCATCCAA  
ACGCTGATGGGGGTGAGGGTGGCGCCAGGGGTCACCAATCTTGGAACCCCACTGGCT  
TCGAGGGGCTGGGGGAGAGAAATACT

>1856

GGAGCATGTGAATGCCATCCAGGAGGCCCGGCGTCTCCTGAACCTGAGTAGAGACACT  
GCTGCTGAGATGGTAAGTGAGAGAATGTGGGCCTGTGCCTAGGCCACCCAGCTGGCCC  
CTGACTGGCCACGCCTGTCAGCTT

>1857

CCTCACCAAGCTCAAGGGCCCCCTTGACCATGATGGCCAGCCACTACAAGCAGCACTGC  
CCTCCAACCCCGGTGAGTGCTACGGCAGGGCCTCCAGCAGGAATGTCTTAATCTAGG  
GGGTGGGGTCGACATGGGGAGAGA

>1858

AGCCTTCCTGAGAAGATGCAACCAATCCTGCTTCTGCTGGCCTTCCTCCTGCTGCCCAG

GGCAGATGCAGGTGAGTGACCGTCTCCACCCTCGGGGGCCCAACCCGATCCCACAGG  
TCTCCTGCCCTTTCTCCACATTCC

>1859

ACGCCATTATTACGACAGTACCATTGAGTTGTGCGTGGGGGACCCAGAGATTAAAAAG  
ACTTCCTTTAAGGTAAGACTATGCACCTGCCTGGATTGGCTCTTGGGAGAAAGATCTTT  
GGGGAATATCTGAGACCTGGAGA

>1860

AGCCTTCCTGAGAAGATGCAACCAATCCTGCTTCTGCTGGCCTTCCTCCTGCTGCCCAG  
GGCAGATGCAGGTGAGTGACCGTCTCCACCCTCGGGGGCCCAACCCCATCCCACAGG  
TCTCCTGCCCTTTCTCCACATTCC

>1861

TGTGAAAAGACCCATCCCCCATCCAGCCTATAATCCTAAGAACTTCTCCAACGACATCA  
TGCTACTGCAGGTGAGGCACACTCCTGCCACTCTTGCTCTTCTTGGTCCAGTTGGTTCC  
ACTCCCCCTGGAATGCCGGCCC

>1862

CTCTGAAGAGGTGCGGTGGCTTCCTGATACAAGACGACTTCGTGCTGACAGCTGCTCA  
CTGTTGGGGAAGGTGAGGAGCAGAAAACAGCCACACCCTCCTGGAAACACTCCACA  
GAGACCCCTGCCTTCTTCCCAAGGA

>1863

TGTGAAAAGAGCCATCCCCCATCCAGCCTATAATCCTAAGAACTTCTCCAATGACATCA  
TGCTACTGCAGGTGAGGCACACTCCTGCCACTCTTGCTCTTCTTGGTCCAGTTGGTTCC  
ACTCCCCCTGGAATGCCGGCCC

>1864

ACGCCATTATTACGACAGTACCATTGAGTTGTGCGTGGGGGACCCAGAGATTAAAAAG  
ACTTCCTTTAAGGTAAGACTATGCACCTGCCTGGATTGGCTCTTGGGAGAAAGATGTTT  
GGGGAATATCTGAGACCTGGAGA

>1865

CATGGTCTCTTTGGGCGGAAGACAGGTCAGGCCCTGGATACTCTTACACAGCCGCCA  
ATAAGAACAAAGGTAAGAGTCACTTGTTAAATAAAACAACACAAAATGCAGGAATATA  
ACATGTGGCAAACATCAGGAGTG

>1866

CATCGTCCCCCTGGGTGTGACCCATATGACATCCCGTGACATCGAAGTACAGGGCTTCC  
GCATCCCTAAGGTAGGCCTGGCGCCCTCCTCACCCAGCTCAGCACCAGCACCTGGTG  
ATAGCCCCAGCATGGCTACTGCC

>1867

CCTGCCACTGCCCCGGGCTGGGCAACCTGCTGCATGTGGACTTCCAGAACACACCATAC  
TGCTTCGACCAGGTGAGGGAGGAGGTCCTGGAGGGCGGCAGAGGTGCTGAGGCTCCC  
CTACCAGAAGCAAACATGGATGGTG

>1868

CGGCCGACCGCCCGCCTGTGCCCATCACCCAGATCCTGGGTTTCGGGGCCGCGTTCCCA  
AGGCAAGCAGCGGTGGGGACAGAGACAGATTTCCTGTTGGGACCCGGGTGGGTGATGAC  
CGTAGTCCGAGCTGGGCAGAGAGGG

>1869

AAGAAGTCGCTGGAGCAGTGGGTGACCGAGGAGGCCGCCTGCCTTTGTGCCGCCTTC

GCCAACCACTCCGGTGGGTGATGGGCAGAAAGGGCACAAAGCGGGAAGTGGGAAGGC  
GGGGGACGGGGAAGGCGACCCCTTACC

>1870

CCCTCGCTTCCTCAGGCTGCTGGACCTAGCTCAGGAGGGACTGAAGGAGGAGTCGGG  
CTTTCTGCGCGAGGTGCGGAGCGAGAGACCGAGGAGTCTCTGCAGGGCGAGCTCCCG  
AGAGGTGCCGGGGCTGGACTGGGGCC

>1871

CAGGATGACCTGGGACCCAGCCCAGCCCCCGAGACCTGACTGAGGCCTTCCTGGC  
AGAGATGGAGAAGGTGAGAGTGGCTGCCACGGTGGGGGGCAAGGGTGGTGGGTGA  
GCGTCCCAGGAGGAATGAGGGGAGGCT

>1872

GGGATGGTGACCACCTCGACCACGCTGGCCTGGGGCCTCCTGCTCATGATCCTACATCC  
GGATGTGCAGCGTGAGCCCATCTGGGAAACAGTGCAGGGGCCGAGGGAGGAAGGGTA  
CAGGCGGGGGCCCATGAACTTTGC

>1873

CATCGTCCCCCTGGGTGTGACCCATATGACATCCCGTGACATCGAAGTACAGGGCTTCC  
GCATCCCTAAGGTAGGCCTGGCGCCCTCCTCACCCAGCTCAGCACCAGCCCCTGGTG  
ATAGCCCCAGCATGGCTACTGCC

>1874

CACCCCGAACACTTCCTGGATGCCAGGGCCACTTTGTGAAGCCGGAGGCCTTCCTGC  
CTTTCTCAGCAGGTGCCTGTGGGGAGCCCGGCTCCCTGTCCCCTTCCGTGGAGTCTTG  
CAGGGGTATCACCCAGGAGCCAGG

>1875

GGGAGCAGGGTTATGAGCACCTGCACCTGGAGATGCACCAGACCTTCCAGGAGCTGG  
GGCCCATTTTCAGGTAAAGCCCTCCCTGGCCCTCGCTGGGAACACCCAGATCCCTGCC  
CCTGCTGCCCAGGACCCTGCCAGGC

>1876

GCAGGATGATCCTGGAGCCCTGGGTGGCCTACAGACAACATCGTGGGCACAAATGTGG  
CGTGTTCTTGTTGTAAGCGGCGAGTTGGGAGCTGAGAGCTGGGAGCAGGGTGGGCAG  
CCTGGGTGTAGGGGGGAGGCGAGAG

>1877

GTGCTGCAGAACGCCCCGGGGGAGCCTGACCCTGGACGTCCAGCCCAGCATCTTCCACT  
ACACCATAGAAGGTGTGGGCCATGCGGGAAGGTCCAGCCCCAGAGACCTGGAGTGG  
CCAGGGATGGGGATGGAGGACTGAA

>1878

CTGTCTCGCTGGATCAGCCCCAAGGTGTGGAAGGAGCACTTTGAGGCCTGGGACTGCA  
TCTTCCAGTACGGTGAGGCCAGGGACCCGGGCAGTGCTATGGGGAAGGGACACCATG  
GGGGCCCAATTTCTCCTTCTCCACC

>1879

GAAGGCGGAAGTGTCACTAGAAAGCCATCAAGGCCAACTCTATGGAAGTCACTGCAGG  
GAGCGTGACACGGTCAGGCCAGCAACCAGCCCCACCCAGAGAGGGTGATGCCAAG  
CCTGCCTCCCAGGCACTGCCTGCCAAT

>1880

TCAGTGAACATCCCCAGAAGGCAACCACCGAGCTGCCCTTGCTGCGGGCGGCCCTCA

AGGAGACCTTGAGGTGGGTGCTGGCTGAGGCCTCCCTGTGGCCCTGGCCCCCTGCTG  
GAGAGCAGCCCCACTGGGTGGTGGC

>1881

TGTGGGTCTGTTTTTGGAGCGAGTGGTGAGCTCAGACTTGGTGCTTCAGAACTACCAC  
ATCCCAGCTGGGGTGAGTGAGCCCCACACCCCTCGAGCTGAGAACCTCCCTCCCCAGT  
CATTCCTGATCCCTGCTCTGCAC

>1882

TGGCTTTGGCATGCGCCAGTGCCTCGGGCGGCGCCTGGCAGAGGCAGAGATGCTGCT  
GCTGCTGCACCACGTAAGCAGGCCTGGGGGCGGGGGCGGGACCTGGGCAGCAGAGG  
CGGGACCTGCACACTGGGGGCGGGGCT

>1883

TTTCCCGCTTCCCATCATCGGGAACCTCTTCCAGTTGGAATTGAAGAATATTCCCAAGT  
CCTTCACCCGGGTAAGAGAAATAGTGTTGATTTTAGGGAGAATAACTCAGCAATTGGAT  
CTGGTATGTGTATTCAACTC

>1884

CTGCTGGACTACAAGGACGAGTTCTCGGGCAGAGGCGACCTCCCCGCGTTCCATGCGC  
ACAGGGACAGGGGTGAGTCCGCGTCCCTGGCACGGAGCGGGGGGTGCATAACACGCC  
CCGGGACAGTTACGGGCGCTAGCCA

>1885

AAACAGGGCAATGAGAGCCGGATCCAGAGGGAGGCCCACTTCCTGCTGGAAGCACTC  
AGGAAGACCCAAGGTGCGTATCTGCTGCCTAGCAGGGCCCAGTCCTCTTGCAGACCAG  
CGGTGTGGGGAGCCCTGGCTGGGAC

>1886

TGAGAAGTTTCTAAGGCTGATGTATTTGTTTAATGAGAACTTCCACCTACTCAGCACTC  
CCTGGCTCCAGGTGAAGCCACTTTCCTCTTTCATCAGTCATCAACTGTAGAGTTTACGT  
TAGAAAAAGAAGGAAAATTTGG

>1887

GCACCATCAATCTCTGGACCCCAACTGTCCCCGGGACCTCACCGACTGCCTGCTCGTG  
GAAATGGAGAAGGTAGGCTCGGCCTCCCATGATGTGGGCTCTCCGGGGTGGGCAGAG  
AATGCACAATTCAGATTTACAGAG

>1888

GGGACAGAGACCACCAGCACAACTCTGAGATATGGGCTCCTGATTCTCATGAAATACC  
CTGAGATCGAAGGTAGGCAAGTGAAGGGACACCGTGCGTGCGGCTGCATCTCC  
CTGGATGGCCAGCCTTGCACATTTT

>1889

CCTCGTGCCCTCCAACCTGCCCCATGAAGCAACCCGAGACACCATTTTCAGAGGATAC  
CTCATCCCCAAGGTAAAGCAATGAGCCTGCAGCACACAGCATGAACACCATCCTATCA  
CTAATCGCCTTCCTGCCAGGGAGC

>1890

AAGCCAGAACACTTCCTGAATGAAAATGGAAAGTTCAAGTACAGTGACTATTTCAAGC  
CATTTTCCACAGGTGAGAAAGATCAGAGGCAGTACCTTCCCTTGAGGAGCAGCCCACA  
CTCCTCATCTCCCCTCCACATGTG

>1891

TCTGGGGAAGACAACCAGGACCTTGCTATCTCCTTTGCAGGAAATGGACTCTCTGCTC

TTAGAACCTCAGGTAGGAGACATCAATCTTGCACATCTGCAAAATCTAGAAAAAAGG  
ATTGGAGAAAGGATCTGGAGTCAA

>1892

CTAACGAGCGCGCGCGCTCGACGTCGAGCGCGACAACCTGCTCGACGACCTGCAGC  
GGCTCAAGGCCAAGTGAGGGCCCGGCACCCAGACTCCTCTTTCTGCGGGCAGGGCA  
CAGGAGGCTAGGCCTGGGGGCTGGGG

>1893

CATTGACCTGGAGCGCAGAATTGAATCTCTCAACGAGGAGATCGCGTTCCTTAAGAAA  
GTGCATGAAGAGGTATACTTGGCCCCCTCTTCCTGGGGTCACTGGGCCATTGGGGAAAG  
CAGCCGGAAGTGGGGTTTGGGGT

>1894

TATCCGGGCTCAGTATGAGACCATCGCGGCTAAGAACATTTCTGAAGCTGAGGAGTGG  
TACAAGTCGAAGGTGGGTGGCCTCGCCCGGGGACTGGGATCTCCGTCCCCCTGGAATC  
CCAAGGCCTTTGGATTGTTGCTTG

>1895

GCAGGAGATGATGGAATACCGACACCAGATCCAGTCCTACACCTGCGAGATTGACGCC  
CTCAAGGGCACTGTGAGTCCCTGCCACCTGGGGCCAGGCCCTGCCCTTCTCTGTCTG  
CAGTTCACACCCTCACTTTGTGAC

>1896

TCAACGTGAAGATGGCCCTGGATGTGGAGATTGCCACCTACCGGAAGCTGCTGGAGGG  
AGAGGAGAGCCGGTGAGGGGCCAGGCAGGAGCCGAGTGGGAGGTGCGGGGTGCTGG  
GTGGTCCATTTCTGTCCCCAGGAGGC

>1897

GCAAAGGGGTTCTGAGGTCCATACCAAGAAGACGGTGATGATCAAGACCATCGAGAC  
ACGGGATGGGGAGGTAAGTGGTCTGTCTGGGCTCCTTACCCTTGGTTGGGGCTATGGA  
TGTGTCTGGGGGGACTGTCTTCCAC

>1898

CCAGTGTGTGAAGCTGAATGATGGTCACTTCATGCCTGTCCTGGGATTTGGCACCTATG  
CGCCTGCAGAGGTAACAATTAATTTTAGTGTTGAGAGTTCAAAGGAGCTAGAGTAA  
GTGGAAGCTGACCAGGTTGTCAG

>1899

AAGGTCACTGAAAAATCTTCAATTGGACTATGCTGACCTCTATCTTATTCATTTCCAGT  
GTCTGTAAAGGTAGGCAGCTTGTGTGATCAAATTAATTTCACTTTTGTCTCAGCATAAA  
TATTGTTTTTCATGGAGATT

>1900

GGAAGTGATCCCAAAGATGAAAATGGAAAAATACTATTTGACACAGTGGATCTCTGT  
GCCACATGGGAGGTGAGTGTTTGGAGGTGAGAGAACGGATAAGAAAGATGAGGTAGG  
ATACATCTGTTTCCTATCTTCTTAG

>1901

CTTCAACCACAGGCTGCTGGAGATGATCCTCAACGAGCCAGGGCTCAAGTACGAGCCT  
GTCTGCAACCAGGTGAGGCGCCCTCAGCCTCCTCTGCCTTTCTGTTCTTCATGCCCTG  
CTTCTGTCTTATTGGCCAAGTA

>1902

ATTTCTGCAAGTCAAAAGACATTGTTCTGGTTGCCTATAGTGCTCTGGGATCCCATCGA

GAAGAACCATGGTAATAAGAGATACAGGAAGTTTGCCGAAAACACTGGTATGATAAAA  
AAGCTGGGAGAAAAAGGGATCAT

>1903

CCAGCTGCAGCGTGGGGTTGTGGTCCTGGCCAAGAGCTACAATGAGCAGCGCATCAG  
ACAGAACGTGCAGGTGAGGAGCGGGGCTGTGGGCCTCAGGTCTCCTGCACAGTGTCC  
TTCACACGTGTGCTTCTTGTAAGGCT

>1904

AGTTGACTTCAGAGGAGATGAAAGCCATAGATGGCCTAAACAGAAATGTGCGATATTT  
GACCCTTGATATGTAAGTGATTTTGGAGATGGTTGTTCTAATTTATTTTCAGAGGAGGAA  
CGTAGGATGGGTGTTGAGAGTGT

>1905

GGCCGTGCGCACCCAGGAGAAGGAGCAGATCAAGACCCTCAACAACAAGTTTGCCTC  
CTTCATAGACAAGGTGAGGGTCCCCTGCGTGGCTGACTGTGCCCCGCAGCCCCTTTCT  
CCTGGTAGTCCCGGTCCCTATGCAC

>1906

GCCAGGAGAAGCTGAAGCTGGAGGCGGAGCTTGCCAACATGCAGGGGCTGGTGGAG  
GACTTCAAGAACAAGTGAGCAACTCCACCCTCCACCCAAGTGAAGTCACCTGCTCTCC  
TCCACCCCTTGACCTTGGGACTAAGT

>1907

GGTAGAGCTGGAGTCTCGCCTGGAAGGGCTGACCGACGAGATCAACTTCCTCAGGCA  
GCTATATGAAGAGGTATGTTCTTGGTCGCAGGAGAGTGAGGGTCCCCAGCCTTGTCAG  
CGCCTCCACCCTGAGACTCAACCAG

>1908

GACTGAGATCTCTGAGATGAACCGGAACATCAGCCGGCTCCAGGCTGAGATTGAGGG  
CCTCAAAGGCCAGGTATGGGCCGGGTGGGGGTGGGAGGGTTCTTGACACAATCCT  
GGTGAGAGGAGATAATGTAGGAAGA

>1909

TGAACGTCAAGCTGGCCCTGGACATCGAGATCGCCACCTACAGGAAGCTGCTGGAGG  
GCGAGGAGAGCCGGTGGGTGTGGGTACCTCTGACCGGACCTGCTTCCCTATCCCTGGG  
ACCTGGGGTGGGGACGGTGGGAGCC

>1910

CCACTCACTGGTCCAGAAGCAGCTGTAGGTGCCACCAAGCCCATGACGACGCTGCTG  
GCCAGGGTCCAGGTGAGCGGCGGCACCGCGGGGAACGGCCACTTTCACGTGCAGAG  
GCCACCCACCCGACCGCCGGCCGGG

>1911

AGCTGCTCTTCTGGGGTATCGCGATCCACTTAAGGATGAGGCAGACTTGGTGACAAGC  
TGGTCTGAGCAGGTATGGGAGCCCCCTGGGGAGACGGAAGAAGGGAGGAAGTTGCCT  
TCTGCCTGGGGAGGGTTTGAGAGGG

>1912

CGCCTTCAATGCCCAGCGGCTGACACTGGCCAAGGTGGCCAGGGAGCAGGTGATGGA  
CACCTTAGTTCGGGTAAGTTCATCACTTCAGGGAAGCCGTGCCCTAACCACCATGAG  
CCAAAGCCCCCATCCCTGCCTGACC

>1913

TCATGGTGCTGCAGGAGGTGGTGGACTCTTCCGGCAGCGCCATCCCGCTCCTGCTTCG

AGAACTCAATCGGTGAGGAAGATTCTGTGGGTCTAATCAGGGGCACACCCAGAGGCTT  
GAGGCCCTGACCCCGCCTCCCCCTT

>1914

CCTACAGCACCTGAGCAGCCCCAGCTGGGGCGCAGCACCTACATGGAGACGTATGT  
GTACTTCTATCGGTGAGCACGGAGCTGGCAGCGCAGCAGGGTGGGGGGCGGTCCCTG  
GCCCTAATGTGAGGTAGGCTCATTA

>1915

GTGTACAACGATGAGGATGACGTCTTTGCCCGGAGCCATTTGTGGCCAGTTCTCTTT  
GCCCAGCAATGGTAGGAAGGGAAGGGTGGGCTTGGTATGTGGGAGCAGAAGGGGAGT  
TCTGGCTGGCTCCACTGGGGGCTT

>1916

GGCCGTAGAGAAGGAGCTGAACGCCCTCTACGATGTGTTTCTGGAGGTCTCCCAGCAC  
TGGCAGAGCAAGGTAGGCCTGGGCAGTTTGTACAGGAGGGACAAGGATAGGGTGGCC  
CAGCGGCCAGCCTGATGGCTGCTGT

>1917

CTGCCGGAGTCTGCTGCACACTGCGGCTGCCTTTGACTTCCCCACGAGCTTCCAGCTC  
ACCGAGGAGGAGGTGAAGGGATGGGGCTGGCATGAGGAGGGAGGGCAGCAGCAGGG  
TCACAGGGAAGCCCCTCGGCCCGGG

>1918

GGAATGGCCAGAGTATTTTATGGCTGTGGCCTTCTTATCAGCACAGAGAAGCAAAGATC  
CAAATTCCCAGGTAAATGAATTTACGGGAGAATGCTTAGATACTCACAGGCAAAGAG  
ATTACTGCACATGAGCAGAAAGG

>1919

GGGTGCAGTGATGACGTGTTGCCTTGGAGAAGGACAGCAGAGAATAAGCTGGACACC  
AAATACCCGTACGGTAGGGCAAGTTTTATGTCCCATTTCTGCTTAGTGACATAGCCTGGT  
GAGTGCCTAATTAAGAAAGTTGGT

>1920

GTGAAAGGCTGTAGTATGTATGTTGCCTTGTTCCCTTGTAATGAATGCGCTAAGCTCATC  
ATCCAGGCAGGTAGGAACCGGGTCTTTCCATTTGTCACATTTGCATTGCTGCCTGCTCG  
TCAGTAGCTCATTGCTGATGT

>1921

ATAAATACCATGATAGTGACGAGGCAACTGCTGCGAGGCTCCTGTTTAATATGGCCGGG  
GTGACATTCCGGTAAGTGGGGAGAATGCGGGCGGGGGACGGGGTAGGGTGAAGGCT  
GATGAAGAGATGTATTTGACCTTG

>1922

CGCCGTGATGCTGTCCCGATCCCGCTGTGTGTCTCGGGCGTTCAGCGCTCCGCTCTCCG  
CCTTCCAGAAGGTACGGTCTGGCCGAGCCGGGGCCCCGACGGGTGAGGAGTCTGTTG  
GCGGGCAGAGAGGCGGCCTGGAAG

>1923

GACTTGGTTACAGTCAAAACCCCAGCGTTTGCAGAATCTGTCACAGAGGGAGATGTCA  
GGTGGGAGAAAGGTAAGATTTAGTTTCTATTTTTTTTTTTTTTTTTTTTGGAGACAGAGT  
CTTGCTCTGTTCCAGCCTGGA

>1924

GCTCTTTTGGTACCTGATGGGGGAAAAGTCGAAGGAGGCACTCCACTTTTCACACTCA

GGAAAACTGGTGGTAAAGAAGTTCTCCTGGTGGTCAAGGTCTCCAGTGTTCCCTCTTG  
GGATTGGGACTGAGCATAATGTGC

>1925

CCTGCAGCACCCATACCCACTCAGATGCCACCGGTGCCCTCGCCCTCACAGCCTCCTTC  
TGGCAAACCTGGTAGGCTTCCAACCTCCCACATGTCATGTGGGAGAACATCTCGTCTAAT  
ATGTTCCCTTCAAAGGGTAAACT

>1926

AGTAAAACCCACTGTTGCCCCACCACTAGCTGACGCAGGAGCTGGCAAAGGTCTGCG  
TTCAGAACATCGGGTAAGCCTCTGAGGACCACTTTCAGGAAAGAGGCAGGGGGCAGT  
GTTGAGATTAGTGGAGTATGGGTGTG

>1927

TTGCTCAGCGTCTGAAGGAGGCCAGAATACATGTGCAATGCTGACAACTTTTAATGA  
GATTGACATGAGGTAGTGTCTCTAGTCCCTCTTATCCCCTAGGCCCTTTTTCTTAGAGA  
ACACGAACTTGCCCCACTCCTT

>1928

CTAGGCTTCATGTCGGCATTGTGTAAGGCCTCAGCCTTTGCCTTGCAGGAACAGCCTGT  
TGTAATGCAGGTGAGTTGCTTGTGGCTGGAATTGGAGAGGTCCTGGGAGGTAGGTGT  
ATGAGCACAGACCTGCTCCCACA

>1929

TGACGACACAACCAAAGAGGTGGTGTATACGGATTATATTGACATCAGTGTTGCAGTG  
GCCACCCACGGGTATGTTGGGGCAGGAGGTGGGGAATGTTGGTCTTAGACCTCACC  
TTATCTGTGTGAAGGAGATCACAC

>1930

AGTCATCAGGAATGTGGAAGCTATGAATTTTGCAGATATTGAACGGACCATCACTGAAC  
TGGGAGAGAAGGTAAAGTAGAAAGATGTATACAAGCTGCTAAGCAGGCGAGGGAAGA  
GAGCCTTCAGAAGGCTGGGCTCAC

>1931

CAACCCCCCTCAGTCTGCCATCCTGGGGATGCATGGCATCTTTGACAGGCCAGTGGCTA  
TAGGAGGCAAGGTAGGAACCGTCACTTCTAAGGTCCCTAGTGGCTAGGTCTCGATGAAA  
GGGAAATCCAATAATGCTAAT

>1932

AGAATGGTGCCTGTCCTGCTGTCTCTGCTGCTGCTTCTGGGTCCTGCTGTCCCCAGGA  
GAACCAAGATGGTGAGTGGGGAAAGCAAGGGATGGGTGCTGGAGAGGACTGGAAGG  
AGGTGAGGAACAGGACATGTGGCTG

>1933

CAGAAGGCCAGGGAGGACATCTTTATGGAGACCCTGAAAGACATCGTGGAGTATTACA  
ACGACAGTAACGGTCAGTGAATAACAGACCACAGGGGTGGAAGGTCTAACCCAAGAG  
GCAGCCCCCCCAGTGTGAGTGGCAA

>1934

CTGGAGGAGGAGTGCCCTGCGACTCTGCGGAAATACCTGAAATACAGCAAAAATATCC  
TGGACCGGCAAGGTACTCACTGCTTCTGCTCCCCAGTACTGAGCCCAGAATAAAAGA  
CGATCTCAGGCTAGGAGCTCAGGC

>1935

GGCTGTTCCCTCGGGCATCGGCCTGCACTTGGCCGTACGTCTGGCTTCAGATCCATCCCA



GAGCTTCAAAGGTATAGATAGGCAGGGACAGGGAGGGAGAGAAGGGAGGAGCCCTTG  
GAGGCTAGAAGGGAAGTCAGATCT

>1936

GACGTAAGGGACTCAAAATCCGTGGCCGCTGCCCCGGAACGCGTGAAGGAGGAGCCCTTG  
GTGGACGTGCTGGGTGAGCCTCCTGGAAGCATATGGGCTCCTAGGAGCCTTCTCCGCC  
CTGCGTTGAAACCAACATGTTCCCA

>1937

TTCCTGCCAGACATGAAGAGGCGCGGTTTCGGGACGCGTGTTGGTGACCGGGAGCGTG  
GGAGGATTGATGGGTGAGTGGTAGGGAGTGGCCTCGGCAGCTCCAGATTCTTTGTGTG  
CGGAGCTGAGCCTTGAAGGCAGGTT

>1938

GCGCCAGCAAGTTCGCGCTCGAAGGCTTATGCGAGAGTCTGGCGGTTCTGCTGCTGCC  
CTTTGGGGTCCAGTGAGTCAACACCCCCGTTCCCCGAACCCTCTTAACTCTGACCTAG  
AGATGCCGAGCACCTGTCCTGCG

>1939

CTACCAATACCTCGCCACAGCAAGCAAGTCTTTCGCGAGGCGGCGCAGAACCCTGA  
GGAGGTGGCGGAGGTGAGCGCCGGGCTGGACTCCAGGAGTGGGGGCGGTGCGTCTCT  
CCGGCCGGCAGCGGTGGCCACAGCTCT

>1940

TTCAGAATGGATTATTTGCTCATGATTTTCTCTCTGCTGTTTGTGGCTTGCCAAGGAGCT  
CCAGAAACAGGTAGGCACGCTCGTTGACTTGTAAGTCTCGGAATTACAAGTTAGTGTG  
TTCTTATCCACCTTCATGCTTT

>1941

GCTCGTCCCTGATGGATAAAGAGTGTGTCTACTTCTGCCACCTGGACATCATTTGGGTC  
AACACTCCCGAGTAAGTCTCTAGAGGGCATTGTAACCCTATTCATTCATTAGCGCTGGC  
TCCACTGGAGCCCAGTTTTAGA

>1942

GTATTTATCAGCAGTTAGTGAGAGGAAGAAAAATCAGAAGAAGTTCAGAGGAACACCT  
AAGACAAACCAGGTAAGAGGGAAGGAAGAAAAATTAGGTAAGAGGTTACAAAGAAC  
AACTAGCCCCAGTCAGTGATGCCAGC

>1943

CCATCTGATCTATAAATGCGGTGGCATCGACAAAAGAACCATTGAAAAATTTGAGAAG  
GAGGCTGCTGAGGTATGTTTAATACCAGAAAGGGAAAGATCAACTAAAATGAGTTTTA  
CCAGCAGAATCATTAGGTGATTTC

>1944

CTATGTGACTATCATTGATGCCCCAGGACACAGAGACTTTATCAAAAACATGATTACAG  
GGACATCTCAGGTTGGGATTAATAATTCTAGGTTTCTTTATCCCAAAGGCTTGCTTTGT  
ACACTGGTTTTGTCATTTGGA

>1945

CCCCGACACAGTAGCATTTGTGCCAATTTCTGGTTGGAATGGTGACAACATGCTGGAG  
CCAAGTGCTAACGTAAGTGGCTTTCAAGACCATTGTTAAAAAGCTCTGGGAATGGCGA  
TTTCATGCTTACACAAATTGGCAT

>1946

ATCCTACCACCAACTCGTCCAAGTACAAAGCCCTTGCGCCTGCCTCTCCAGGATGTCTA

CAAAATTGGTGGTAAGTTGGCTGTAAACAAAGTTGAATTTGAGTTGATAGAGTACTGT  
CTGCCTTCATAGGTATTTAGTAT

>1947

TCGTCGTGGCAACGTTGCTGGTGACAGCAAAAATGACCCACCAATGGAAGCAGCTGG  
CTTCACTGCTCAGGTAACAATTTAAAGTAACATTAACCTTATTGCAGAGGCTAAAGTCAT  
TTGAGACTTTGGATTGCACTGAA

>1948

GCTGCCATTGTTGATATGGTTCCTGGCAAGCCCATGTGTGTTGAGAGCTTCTCAGACTA  
TCCACCTTTGGGTAAGGATGACTACTTAAATGTAAAAAAGTTGTGTTAAAGATGAAAAA  
TACAACTGAACAGTACTTTGGG

>1949

AGCAGCTTCTTGATCGTGGTGGTGTTCCTCATCGCTGGGACGCTGGTTCTAGAGGCAG  
CTGTACGGGAGGTGAGTGAACAGGTGACCTGCTGGGCTGGGTTGGACTAAGGGGAG  
ACCCTCTGGGACACCCTGGGCCAGG

>1950

GGGCATCCCTGGGTGCCAGACCTGCCGCTACCTCCTGGTGAGAAGTCTTCAGACGTTT  
AGTCAAGCTTGGGTGAGTGGCCTATGGCTGAGGCTGAGGTGGGAGCATGGAACGGGT  
GTGGGATATGCCCCAGCATTGCTA

>1951

TCGAATCCAGTGTTCTGTGACGCGCTCAACCAGGGTCAAGTCTGGATTGGAGGCAGG  
ATCACAGGCTCGGTAAGAGAAGTGTGAACACTAAATGGGGTGACCTGCTGATCTCAG  
CCAGCACTCAGCTTGCATCAGATT

>1952

AACTTTGCGTACTGGGCTGCTCACCAGCCCTGGTCCCGCGGTGGTCACTGCGTGCCCC  
TGTGTACCCGAGGTGAGGTGGGGCTGGGGATGAACGATGGAAAGGTCTGGGAGATGG  
GAAGTGCCCCAAGGAGGAGATGCTA

>1953

CCTTCGAGCTCCTTGTGCGCGCTGTTGGTGCTGCTGCTGCTGCTGACGCAGCCAGGGC  
CCATCGCCAGCGGTGAGAGCGCATGGCGCGCGGGACGCACTCGCACTCGGGCACAGA  
GGTGCATCCCAGCCTCTGCGGGGTC

>1954

TTCATCCCAAAATGATCAGTAATCTGCAAGTGTTGCCCATAGGCCACAGTGCTCCAAG  
GTGGAAGTGGTGTAAGTTCTGTGCTGCTGTGTCCGCTGTGACCTTGGAAGAGAGAAA  
TCCCGCAGCCTGGGTCTTCAACC

>1955

ACGGGAAGGAAATTTGTCTTGATCCAGAAGCCCCCTTTTCTAAAGAAAGTCATCCAGAA  
AATTTTGGACGGGTACTTGTCACTTTGATCTTTGTGGTTTCTAAATCTGATCTAGGGAGA  
CCATAGACTTCACAAGGTCTTT

>1956

ACGCCTCATCTGTGACAGCCGAGTCCTGGAGAGGTACCTCTTGGAGGCCAAGGAGGC  
CGAGAATATCACGGTGAGACCCCTTCCCCAGCACATTCCACAGAACTCACGCTCAGGG  
CTTCAGGGAACCTCCCAGATCCA

>1957

CTGCAGCTTGAATGAGAATATCACTGTCCCAGACACCAAAGTTAATTTCTATGCCTGGA

AGAGGATGGAGGTGAGTTCCTTTTTTTTTTTTTTTCCTTTCTTTTGGAGAATCTCATTTG  
CGAGCCTGATTTTGGATGAAA

>1958

GCTGCATGTGGATAAAGCCGTCAGTGGCCTTCGCAGCCTCACCCTCTGCTTCGGGCT  
CTGGGAGCCCAGGTGAGTAGGAGCGGACACTTCTGCTTGCCCTTTCTGTAAGAAGGG  
GAGAAGGGTCTTGCTAAGGAGTACA

>1959

ATAGATGCCAATGTGCTAGCCAAAAAGACAAGAAGTGCTGGAATTTTTGCCAAGCAGG  
AAAAGAACTCAGGTGAGCAGAAACACCTTTGCTTTTCAATCAGTTTAACAGCCTCCTG  
AACTCCTTCCTATCATGGTACTGC

>1960

AAACATTGAAGTTGTTTTTGAACCTGGTGTCACCTTTAATTACAACCTAGCAGACGGAA  
CTGAACTCAGGGTAAGAATTTTTTTTTTTATGAGCAATGCATTCTTGATTTTTCTACCCA  
ATATTAAAATGATTTCTGCTC

>1961

ATTCAAACGGACAGACAATGGAAACGAACTGAATACTGTCCGAGAAATTATAGGTGAT  
GAACTAGTCCAGGTGAGTTGTCAAATTTATAGCTATTTTCAAAGGCCAAAATTACTAC  
AAAACAATAATTTTTGTCACTGC

>1962

CTGCTATATCCTGGATGCCATCCTGTTTCTGTATGGAATTGTCCTCACCTCCTCTACTGT  
CGACTGAAGGTAGCGCTGGGCAGGGTGGGGTAAGGGCTGGAAGGGGAAGTGGGAGG  
AGGGCAGCAGCAAGGATTCTGAAG

>1963

ATCATGGCAGAATCACCAGGCCTCATCACCCTCTGCCTTTTAGGATATCTACTCAGTGCT  
GAATGTACAGGTTTGTTTCCTTTTTTAAAATACATTGAGTATGCTTGCCTTTTAGATATAG  
AAATATCTGATGCTGTCTT

>1964

GAGAGAATGTATGGAAGAAAAGTGTAAGTTTGAAGAAGCACGAGAAGTTTTTGAAAA  
CACTGAAAGAACAGTGAGTATTTCCACATAATACCCTTCAGATGCAGAGCATAGAATAG  
AAAATCTTTAAAAAGACACTTCTC

>1965

TGCAAGGATGACATTAATTCCTATGAATGTTGGTGTCCCTTTGGATTTGAAGGAAAGAA  
CTGTGAATTAGGTAAGTAACTATTTTTTGAATACTCATGGTTCAAAGTTTCCCTCTGAAA  
CAAGTTGAAACTGGAAAATGC

>1966

AACAAGGTGGTTTGCTCCTGTACTGAGGGATATCGACTTGCAGAAAACCAGAAGTCCT  
GTGAACCAGCAGGTCATAATCTGAATAAGATTTTTTAAAGAAAATCTGTATCTGAAACT  
TCAGCATTTTAACAAACCTACAT

>1967

CCAATCATTTAATGACTTCACTCGGGTTGTTGGTGGAGAAGATGCCAAACCAGGTCAAT  
TCCCTTGGCAGGTACTTTATACTGATGGTGTGTCAAACTGGAGCTCAGCTGGCAAGA  
CACAGGCCAGGTGGGAGACTGAG

>1968

GTTAATGAAAAATGGATTGTAAGTCTGCTGCCCACTGTGTTGAAACTGGTGTTAAAATTAC

AGTTGTCGCAGGTAAATACACAGAAAGAATAATAATCTGCAGCACCCTAGCTCTTTAA  
TATGATTGGTACACCATATTTT

>1969

GGATAGCCTCTCTTACTACCACTCACCCGCAGACTCCTTCTCCAGCATGGGCTCGCCTG  
TCAACGCGCAGGTAAAGGCTGGCTTCCCGTCGCCGCGGGGCCGGGGGCTTGGGGTCGC  
GGAGGAGGAGACACCGGGCGGGAC

>1970

GGCTGGCGTTGTGAAGACCATGACAGGAGGCCGAGCGCAGAGCATTGGCAGGAGGG  
GCAAGGTGGAACAGGTGAGGAACTCTAGCGTACTCTTCCTGGGAATGTGGGGGCTGG  
GTGGGAAGCAGCCCCGGAGATGCAGGA

>1971

GGAAAGGAATAAGATGGCTGCAGCCAAATGCCGCAACCGGAGGAGGGAGCTGACTGA  
TACACTCCAAGCGGTAGGTACTCTGTGGGTTGCTCCTTTTTAAAACTTAAGGGAAAGTT  
GGAGATTGAGCATAAGGGCCCTTG

>1972

GAGTCACTCTCCCCAGGAGACCCAGACCTAGAACTACCCAGAGCAAGACCACAGCTG  
GTGAACAGTCCAGGTAAGAAACATATTCTGGGGGACTGGGTAGCTTGACATAGACACA  
CTTAATACACTGGTGAACACAATAG

>1973

CATTTTTCTGCACTGGCCAGAAAATGGAGTCTTAAACCTTGAATCCCCCATAACTACCT  
CAACTACAAAGGTAAAGAGGCTTAGTCAGTCTTAAGATGTAACCTTCTGTAAAGGAAT  
TGGCAGATCCTTCCTTTCTTCCT

>1974

GTCTCCACTGCTGCCCTTGCCGTCTCCTCTGCACCATGGCTCTCTGCAACCAGGTCCT  
CTCTGCACCACGTGAGTCCATGTTGTTGTTGTGGGTATCACCACTCTCTGGCCATGGTT  
AGACCACATCAGTCTTTTTTTTG

>1975

GACAGATTCCACAGAATTTTCATAGCTGACTACTTTGAGACGAGCAGCCAGTGCTCCAA  
GCCCAGTGTCATGTAAGTGCCAGTCTTCCTGCTCACCTCTAGGGAGGTAGGGAGTGTC  
AGGGTGGGGGCAGAAACAGGCCAG

>1976

GCGCTCCCACTCTCGGCCGACACCCCTCATGGCCAACCGTTACACCATGGATCTGACT  
GCCATCTACGAGGTGAGTCCCCGCCGCACGGCATCCCCGGTACCTGCATGCCTGAGTC  
CGAGTCCCCACCTCTCTAGCGCCG

>1977

GACCCATGGACAAGAGCGCAGGCAGTGGCCACAAGAGCGAGGAGAAGCGAGAAAAG  
ATGAAACGGACCCTGTGAGTATGGCTTTCTTCCCTCTCCCGCCACCCCCTGCCCCACAC  
TGCAAGCTGCAAACGCGGTACTTTC

>1978

TCTTACAAAATTCTCTACTCCTGGGAAGCCCCAAAACCGGCAAAAAAAGCAAACAGC  
AAGCTTTCATCAAGTAAGTTGAGAATCCTGTGCTTGCAAATATCAATAGTTAGCTGCTG  
AACTGAAAAGGGGAACTCTGATGT

>1979

ACCCCAAAAGCTGTCTCTCAAAGCAAGGAAAATATATACTGACTTCATAGAAAAGGAA

GCTCCAAAAGAGGTAAGGAAACAAGTTCCTAATTTTCAGCACAAATCTGGACATCTTTAG  
CACAAAAGTGAAACAGTAATCAAG

>1980

GTCAGCGCCGGGCGCGTCAACCTCATCGGGGAACACACGGACTACAACCAGGGCCT  
GGTGCTGCCTATGGTGAGGGGCTGCACGGGGAGCCCCCTAGCCCCGCCGCCCTGTCCC  
GGTCGCCGAGGAGGGCGGGCCTCGG

>1981

CAGCGCTCGCTGGAGCCTGGGACTCCTCGGTGGGCCAACTATGTCAAGGGAGTGATTC  
AGTACTACCCAGGTATGGGGCCCAGGCCTGAGCCAAGTCCTCACTGATACTAGGAGTG  
CCACCTCACAGCCACAGAGCCCAT

>1982

GGGGGTGGCCTGTCCAGCTCAGCATCCTTGGAAGTGGCCACGTACACCTTCCTCCAGC  
AGCTCTGTCCAGGTACCAGCTAGGCCCCAGCCCTGACCCAGCCCTCCTTCCCTGAGGT  
CTCCAGGTGGTCCCAGCTTCTACT

>1983

CCTGTGGCATCATGGACCAGTTCATCTCACTTATGGGACAGAAAGGCCACGCGCTGCT  
CATTGACTGCAGGTTGGGCTCGCTCCCCTCGTCCCCTCCCGCCCTGCACTCAGCAGCT  
CCTGGGTGGAGTGTGCCCACTGCC

>1984

CAATGTGAAGAAGTGGCCCCGGGCGCTGGGCAAGGAAAGCCTCCGGGAGGTACAAC TG  
GAAGAGCTAGAGGGTGAGAACTGCCAGGGTGCTCTATCCTGGAGGCGGCTGTGCTCC  
CTGCTGGCGCCTCAGTGTGGCCTTGA

>1985

CGGCCGCCCTGAGACGTGGCGACTACAGAGCCTTTGGCCGCCTCATGGTGGAGAGCC  
ACCGCTCACTCAGGTGAGGCCCTCTGGGCGCCCCGCTCCTGCCGGGCACAGGCCGGC  
CCAGGCCACCCCTTCAATATCCTCT

>1986

TGGCTTCGGTGGCTGCACGGTGACACTGCTGGAGGCCTCCGCTGCTCCCCACGCCATG  
CGGCACATCCAGGTGGGCGGGCACCAGGGCCTGGGCGGGCAGGAGCGGCAGCTTCCC  
GGGGCCCTGCCACTCACCCCCAGCC

>1987

GGAACCGATCCTCAGCAACGCCAGCAGGCGTCAGAGGCGGACGCCGCAGCAGCAAC  
CTTCCGGGCAAACGGTAACCTGCACCGCGGCAGGGACTCGCTGGGGCGCGGAGCCGAG  
CCCTCCCCTTCCTTAGGAAGCTTTCGT

>1988

TCTGAAGACAGTGCCCCGCCATGACCCTCTCAACCCTCTGTGTCCTGGGGCCATCCGA  
GCCAACGGAGAGGTAAGCCTGTAGAGCCCTGCATCTGCAGGCTGGGCCACGGGGAGT  
AGTTCCTCTTAGAACTGTCCTCCA

>1989

CCCCAGTACGATAGCACCTTCCTGTTTGACAACGACTTCCCAGCTCTGCAGCCTGATGC  
CCCCAGTCCAGGTAACCTGGCTCCAACCTGCTGCTGGGGAGGAGGGTGGCTAGACCTCT  
TGAGGGACTTCTGCTGCAGAGAT

>1990

GATCCGGGCTGTTGTTGATGCATGGGCCTCAGTCACAGAGGAGCTGGGTGCCCAGTAC

CCTTGGGTGCAGGTTTGTGAGGTCGCCCCCTCCCCTGGATGGGCAGGGAGGGGGTGAT  
GAAGCTTTGGTTCTGGGGAGTAAC

>1991

GCAGGCCTATAAGAGTCAGCATGGAGAGCCCCCTGCTAATGGAGTACAGCCGCCAGGAG  
CTACTCAGGAAGGTGGGAGAGAGCCAAGCCCTGTGTCCCCAAGGAGTCCCTAACTTT  
CTTATCCCATGAGAGAGGTGTGTAA

>1992

TACCAGACACTGCTGCTGCCCCGTCGGCATGTGCGGCGGCTACCTGAGCTGACCCCTG  
CTGAGCGTGATGGTCAGTCTCCCAAGTAGGATCCTGGGGCTAGGCACTGGATGGAGGT  
TGCTCCCAGTAGGGTCAGCATCTG

>1993

ATGAAGAAGCTCTTGACCAAGTATGACAACCTCTTTGAGACGTCCTTTCCCTACTCCAT  
GGGCTGGCATGGTGAGGCTTTTCAAGTACCTATATTTAGCCCCAACACCATTTCTGGGC  
TCCTGGGCTCAGCCTAGTGAAC

>1994

CACTGTCCGAAATTCATGGTTGGCTACGAAATGCTTGCTCAGGCTCAGAGGGACCTC  
ACCCCTGAGCAGGTCAGGACTCAGAACAGTCTGGCGTCTCCAGACTCTCACATGCAGT  
ATGTGCAGGCACCTGATACTTCTG

>1995

ACAAGGCTACTATCACAAGCCTGTGGGGCAAGGTGAATGTGGAAGATGCTGGAGGAG  
AAACCCCTGGGAAGGTAGGCTCTGGTGACCAGGACAAGGGAGGGAAGGAAGGACCCT  
GTGCCTGGCAAAAAGTCCAGGTCGCTTC

>1996

ACAAGGCTACTATCACAAGCCTGTGGGGCAAGGTGAATGTGGAAGATGCTGGAGGAG  
AAACCCCTGGGAAGGTAGGCTCTGGTGACCAGGACAAGGGAGGGAAGGAAGGACCCT  
GTGCCTGGCAAAAAGTCCAGGTCGCTTC

>1997

CAAGGGCACCTTTGCCAGCTGAGTGAAGTGCCTGTGACAAGCTGCATGTGGATCCT  
GAGAACTTCAAGGTGAGTCCAGGAGATGTTTCAGCACTGTTGCCTTTAGTCTCGAGGC  
AACTTAGACAAGTGAATGATC

>1998

GGCTGCTTTTAACTCTGGTAAAGTGGATATTGTTGCCATCAATGACCCCTTCATTGACCT  
CAACTACATGGTGAGTGCTACATGGTGAGCCCCAAAGCTGGTGTGGGAGGAGCCACCT  
GGCTGATGGGCAGCCCCCTTCAT

>1999

TCCATGGCACCGTCAAGGCTGAGAACGGGAAGCTTGTCATCAATGGAAATCCCATCAC  
CATCTTCCAGGAGTGAGTGGAAGACAGAATGGAAGAAATGTGCTTTGGGGAGGCAAC  
TAGGATGGTGTGGCTCCCTTGGGTA

>2000

GTGGGGCGATGCTGGCGCTGAGTACGTCGTGGAGTCCACTGGCGTCTTCACCACCATG  
GAGAAGGCTGGGGTGAGTGCAGGAGGGCCCGGGAGGGGAAGCTGACTCAGCCCT  
GCAAAGGCAGGACCCGGGTTCATAAC

>2001

CTGCTGATGCCCCCATGTTTCGTCATGGGTGTGAACCATGAGAAGTATGACAACAGCCTC

AAGATCATCAGGTGAGGAAGGCAGGGCCCGTGGAGAAGCGGCCAGCCTGGCACCCCTA  
TGGACACGCTCCCCTGACTTGCGC

>2002

CACCACCAACTGCTTAGCACCCCTGGCCAAGGTCATCCATGACAACTTTGGTATCGTG  
GAAGGACTCATGGTATGAGAGCTGGGGAATGGGACTGAGGCTCCACCTTTCTCATCC  
AAGACTGGCTCCTCCCTGCTGGGG

>2003

CCCACTCCTCCACCTTTGACGCTGGGGCTGGCATTGCCCTCAACGACCACTTTGTCAA  
GCTCATTTCTGGTATGTGGCTGGGGCCAGAGACTGGCTCTTAAAAAGTGCAGGGTCT  
GGCGCCCTCTGGTGGCTGGCTCAG

>2004

CTCCTCAACAGCAGCAGTGTGGGCAACCTCAGCTGCGAGCCCCCTCGCATTGCGGGA  
GCCGGGACACGAGGTGGGTGCCTCCCTCAGCCCCCCCCACAAGCTATTTCTCACTGTA  
CCCCAGAACACTAATAGAGTCCCCC

>2005

CTCCTGCCCAATCTCATGGGCACATTCATCTTTGGCACCGTCATCTGCAAGGCGGTTTC  
CTACCTCATGGGTGGGTGAGACAACCACCCACCCCCACTTGCCACTCTCCCCGCCTAA  
AGCTCTTGTGGATGTAGGGGTCT

>2006

TGCAACCAGTGGGGCCTCGTGTGCTGCAGTGCCTGCATCGCTGGCCCAGTGCGCGGGT  
CCGCCAGACCTGGTGAGCTTGCCATAAACTATCCTAGGAATTCCTTTCTACCCCTATT  
AGATGCTTACGACCATTGCCCA

>2007

GGGCTTCGCTTTGACGGCGACAGTGACAGCGACAGCCAAAGCAGGGTCCGAAACCAA  
GGCGGGCTGCCAGGTGGGGCTGGACCACGTGAGCAAAATCTGGGCGAGGCGGACGTT  
TGGAGGGCGACGGGGCCTGCTGGAGT

>2008

GAGCAGCAGGGCCCAGCCTCTCATCATCGAAGGCAGCTGGGACCCCAGGGTCCCCCA  
CACCTCGTGGCAGGTAGGAGCTGCTGACTGCCCTGCTTGCCTCACTTGGCCATGTTTG  
GCCAAGGTCTCCCCAGACTGGCTCT

>2009

CCTCAAGAACCTGAGCCCGTCGGCCAGCCAGTACGTGGAACAGATGTTTGAGACTTTT  
GACTTCAACAAGGTGAGCAGGGGGCCAGTGGCAGGGAGGGGAAGTGCTGGAGGGAC  
CCCTCTGGAAGCCTGACCAGCTGGGG

>2010

GTA CTTCAAGCTCTATGATGTAGATGGCAACGGCTGCATTGACCGCGATGAGCTGCTCA  
CCATCATCCAGGTGCAGAGGGGCCCGGCACTGGGGGGCAGCGGTCTGGGGTGGGACCC  
GGA ACTGAGAGCCCAGGGTTAGAA

>2011

AGCGATACCACCATGACTGCAGAGGAGTTCACCGATACAGTGTTCTCCAAGATTGACG  
TCAACGGGGATGGTGAGGGGGCCGAGGAGGGGCTCCCCAGCGGAGGGGTCACCATG  
GATGTGGGGTCACCAGGGGTGGAAGG

>2012

TGGAACCCCTGTGGTCTTCTCTTCATCTAATGACCCTGAGGGGATGGAGTTTTCAAGTC

CTTCCAGAGAGGTAAGAGAGAGAGCTCCCAATCAGCATTGTCACAGTGCTTCTGGAAT  
CCTGGCACTGGAATTTAATGAAT

>2013

AGTAGGGTAAGCATCATGGCTGGCAGCCTCACAGGATTGCTTCTACTTCAGGCAGTGT  
CGTGGGCATCAGGTGAGTGAGTCAAGGCAGTGGGGAGGTAGCACAGAGCCTCCCTTC  
TGCCTCATAGTCCTTTGGTAGCCTT

>2014

GAGAGTACACGCAGTGGGCGACGGATGGAGCTGAGTATGGGGCCCATCCAGGCTAATC  
ACACGGGCACAGGTAACCATTACACCCCTCACCCCTGGGCCAGGCTGGGTCTCCTA  
GAGGTAAATGGTGTCAGTGATCAC

>2015

GCTCTCAACATCCTTGCCCTGTCACCCCTGCCCAAATTTGCTACTTAAATCGTACTTC  
TCTGAAGAAGGTGAGGAGGAAGGGGACAAGATGACATAGAGCCATTGAAACTTTTCG  
TTTTTCTTTTCTTTTTTTTAAAAT

>2016

ATGGGAAGGGGTCACTCAAGGGACAGCCCGGAGACATCTACCACCAGACCTGGGCCA  
GATACTTTGTGAAGTAAGGGATCAGCAAGGATGTGGGATCAGGACTGGCCTCCCATTT  
AGCCATGCTGATCTGTGTCCCAACC

>2017

TACTACCACAATGTCCGCCTACTCATGCTGGATGACCAACGCTTGCTGCTGCCCCACT  
GGGCAAAGGTGGTAAGGCCTGGACCTCCATGGTGCTCCAGTGACCTTCAAATCCAGCA  
TCAAATGACTGGCTCCCAAAC

>2018

GTTCTGGGAGCAGAGTGTGCGGCTAGGCTCCTGGGATCGAGGGATGCAGTACAGCCA  
CAGCATCATCACGGTAAGCCACCCAGTCTCCCTTCCTGCAAAGCAGACCTCAGACCT  
CTTACTAGTTTCACCAAAGACTGAC

>2019

CCATCATTGTAGACATCACCAAGGACACGTTTTACAAACAGCCCATGTTCTACCACCTT  
GGCCACTTCAGGTGAGTGGAGGGCGGGCACCCCATTCATACCAGGCCTATCATCTC  
CTACATCGGATGGCTTACATCAC

>2020

AGAAGAACGACCTGGACGCAGTGGCACTGATGCATCCCGATGGCTCTGCTGTTGTGGT  
CGTGCTAAACCGGTGAGGGCAATGGTGAGGTCTGGGAAGTGGGCTGAAGACAGCGTT  
GGGGGCCTTGGCAGGATCACACTCT

>2021

TGGAACCCCTGTGCTCTTCTCCTCATCTAGTGACCCTGAGGTGATGGAGTTTTCAAGTC  
CTTCCAGAGAGGTAAGAGAGAGAGCTCCCAATCAGCATTGTCACAGTGCTTCTGGAAT  
CCTGGCACTGGAATTTAATGAAT

>2022

CAAGAGCAGAAGCAGTGGGCATTGGATGGAGCTGAGTACAGGACCATACAGGCTAATT  
GCACCGGCACAGGTAACCATTACACCTTCACCCCCGGGCCAGGCTGGGTCTCCTA  
GAGGTAAACGGTGTCAGTGATCAC

>2023

CTATGCAGACACCCCTGATGATTTCCAGTTGCACAACTTCAGCCTCCAGAGGAAGAT



ACCAAGCTCAAGGTAGGCATTCTAGCTTTTTTCAGGCCCTGAGGGCCCTGATGTCTGGG  
GGTTGAGAAACTGTAGGGTAGGTC

>2024

ATGGGAAGGGGCCACTCAAGGGACAGCCCAGAGACATCTACCACCAGACCTGGGCCA  
GATACATTGTGAAGTAAGGGATCAACAAGGATGTGGGATCAGGACTGGCCTCCCCTTT  
GGCCATGCTGATCTGTGTCCCAACC

>2025

TACTCACCACAATGTCCGCCTACTCATGCTGGATGACCAACGCTTGCTGCTGCCCCACT  
GGGCAAAGGTGGTAAGGCCTGGACCTCCATGGTGCTCCAGTGACCTTCAAATCCAGCA  
TCCAAATGATTGGCTCCCAAAC

>2026

GTTCTGGGAGCAGAGTGTGCGGCTAGGCTCCTGGGATCGAGGGATGCAGTACAGCCA  
CAGCATCATCAGTAAGCCACCCAGTCTCCCTTCCTGCAAAGGAGACCTCAGACCC  
ATTAGTAGTCTCACCAAAGACTGAT

>2027

CCATCATTGTAGACATCACCAAGCACACGTTTTACAAACAGCCCATGTTCTACCACCTT  
GGCCACTTCAGGTGAGTGGAGGGCGGGCACCCCATTCATACCAGGCCTATCATCTC  
CTACATCGGATGGCTTACATCAC

>2028

AGAAGAACGACCCGGACGCAGTGGCACTGATGCATCCCGATGGCTCTCCTGTTGTGGT  
CGTCCTAAACCGGTGAGGGCAATGGTGAGGTCTGGGAAGTGGGCTGAAGACAGCGTT  
GGGGGCCTTGGCAGGATCACACTCT

>2029

AGCCTTCCTGAGAAAATGCAGCCATTCTCCTCCTGTTGGCCTTTCTTCTGACCCCTGG  
GGCTGGGACAGGTAAGTGACTATCCCTATTCCAGAGGCCTGAACCCATCTTATAAGATA  
CCCTGTACCCATGAGCACTGGT

>2030

GATCCCAAGGCCCAACTCCCCGAACCACTCAGGGTCCTGTGGACAGCTCACCTAGCTG  
CAATGGCTACAGGTAAGCGCCCCATAAATCCCTTTGGCACAATGTGTCCTGAGGGGAG  
AGGCAGCGACCTGTAGATGGGACG

>2031

GCTTTTTGACAACGCTATGCTCCGCGCCCATCGTCTGCACCAGCTGGCCTTTGACACCT  
ACCAGGAGTTTGTAAGCTCTTGGGGAATGGGTGCGCATCAGGGGTGGCAGGAAGGGG  
TGACTTTCCCCCGCTGGAAATAAG

>2032

CCAGACCTCCCTCTGTTTCTCAGAGTCTATTCCGACACCCTCCAACAGGGAGGAAACA  
CAACAGAAATCCGTGAGTGGATGCCTTCTCCCCAGGCGGGGATGGGGGAGACCTGTA  
GTCAGAGCCCCCGGGCAGCACAGCC

>2033

CGGCGCCTCTGACAGCAACGTCTATGACCTCCTAAAGGACCTAGAGGAAGGCATCCAA  
ACGCTGATGGGGGTGAGGGTGGCGCCAGGGGTCCCCAATCCTGGAGCCCCACTGACT  
TTGAGAGACTGTGTTAGAGAAACAC

>2034

GGATCCCAAGGCCCAACTCCCCGAACCACTCAGGGTCCTGTGGACAGCTCACTAGCG

GCAATGGCTGCAGGTAAGCGCCCCTAAAATCCCTTTGGCACAATGTGTCCTGAGGGGA  
GAGGCGGCGTCCTGTAGATGGGACG

>2035

GCTTTTTGACAACGCTATGCTCCGCGCCCGTCGCCTGTACCAGCTGGCATATGACACCT  
ATCAGGAGTTTGTAAAGCTCTTGGGTAATGGGTGCGCTTCAGAGGTGGCAGGAAGGGGT  
GAATTTCCCCCGCTGGGAAGTAA

>2036

CCAGACCTCCCTCTGCTTCTCAGAGTCTATTCCAACACCTTCCAACAGGGTGAAAACG  
CAGCAGAAATCTGTGAGTGGATGCCTTCTCCCCAGGTGGGATGGGGTAGACCTGTGGT  
CAGAGCCCCCGGGCAGCACAGCCA

>2037

TGGCGCCTCGGACAGCAACGTCTATCGCCACCTGAAGGACCTAGAGGAAGGCATCCA  
AACGCTGATGTGGGTGAGGGTGGCACCAGGATCCAATCCTGGGGCCCCACTGGCTTCC  
AGGGACTGGGGAGAGAAACACTGCT

>2038

GCTGCAGCGGCGCCTCGGACCCCGGGGCCTGGTGGTGCTCGGCTTCCCGTGCAACCA  
GTTTGGGCATCAGGTGCGCCGGGCGGAGCGGGGCGGGGCGGGGCGGACGTGCAGTA  
GTGGCTGGGGGCGCCGGCGGTGTGCT

>2039

TTCGCCGCCCCTGCGCGTCCAGCTCTTCTAAGACGAGATGCCGTCGGGCTTCCAACAG  
ATAGGCTCCGAAGTAGGATTCATCATGAGGGGGCGGGGCGGGGGGCGACGGGTCCCC  
CTTTTCTTGGGCTGGGGTCGCGGTT

>2040

TGTGTTCTCTGCGGTGCTTGGCTCCCTGCAGTTTGGGTACAACATTGGGGTCATCAATG  
CCCCTCAGAAGGTGAGGGCCTGCAGCTGGCAGGGTGGGGGTACCCAAACGAGGAGG  
ACAGGTGTCTCGGGGGTGGTGAAA

>2041

TGGCCATCTTTTCCGTGGGCGGCATGATTTCCCTCCTTCCTCATTGGTATCATCTCTCAGT  
GGCTTGGAAGGTTTCGAGCTGGAGGGCAGGGGTGGGGGAAACAGGAAGGGAGCCAC  
TGCTGGGTGCCCTCACCTCACAG

>2042

GGCCTGGCCAACGCTGCTGCCTCCTATGAAATGCTCATCCTTGGACGATTCTCATTGG  
CGCCTACTCAGGTACTCACGGGCACACAGCCCTGCCTAGCGCCCTGTTCTCTTTACC  
ATGCCTGGGCTTTCAGATGGGA

>2043

CACTCACCTGCGGGGCGCCCTGGGGACGCTCAACCAACTGGCCATTGTTATCGGCATT  
CTGATCGCCCAGGTGACCGGAGCAAGCCTCATGGGTGCCTGGGCAGTGGTTAGAGTG  
GGGCTCTGGAGAATATGGTGGGCTT

>2044

CTGCCCTTCTGTCCCGAGAGCCCCCGCTACCTCTACATCATCCAGAATCTCGAGGGGCC  
TGCCAGAAAGAGTAAGCTCTCCCGCTGCAGCCTGGCCCAGGCCCATGCCTCCGCCTCA  
TCTTGCTAGCACCTGGCTTCCTC

>2045

TACCCACCGGCAGCCCCTGATCATTGCGGTCGTGCTGCAGCTGAGCCAGCAGCTCTCT

GGCATCAATGCTGTATGTGTGGAGCAGCCTCCAGGCAGGGCACAGCCCCGGGAGGGT  
AGACGAGAGTGGGGAGCAAACCCCC

>2046

AGGGGTAGGCCAGCCTGCCTATGCCACCATAGGAGCTGGTGTGGTCAACACAGTCTTC  
ACCTTGGTCTCGGTAAGTCTCACCTCTGGAATGGCCCGAGCCACTGGCTTCACCTCC  
CTGGGTGTCCCGGAGGTCCTGCTC

>2047

GCTCCATCTCCTGGGCCTGGCGGGCATGTGTGGCTGTGCCATCCTGATGACTGTGGCTC  
TGCTCCTGCTGGTAAGGCCTGGAGGCTAGGAGGGGCTAGCAGCCCACCCCATGGGAAT  
GGTCCTGTGAGTCTCTGTGACCA

>2048

CATGGCTGTGGCTGGTTTCTCCAAGTGGACGAGCAACTTCATCATTGGCATGGGTTTCC  
AGTATGTTGCGGTAGGTCCCCCGCCCCAGCCTCCCACACCGTAGGCCAGAGGTGGGC  
ATCACACAGCTAGCCACCTGCT

>2049

GCCCAGCCACCCCGGCCCTGAGCCCAGCCGGGCCCCAGCATCCCTACTCCCACCAGC  
GCCAGAACACAGGTAAGGGCCAGGCAGCTAGGAGCAGGTGGGCAACAAGGGTGGTG  
TCAAGGCCTGAAGCCTGGGGCTGGGA

>2050

GTTCCCTCGTGTGAAGAACTGGGAGGTGGGGAGCATCACCTATGACACCCTCAGCGCC  
CAGGCGCAGCAGGTAAGGCCGGCATGCCCTGTCCCATCGTCTCCAGGGAAAGGGTG  
GGTAAGGCCTGGCCTCAGATGGGGC

>2051

CCCCGGCCCCTGAGCAGCTGCTGAGTCAGGCCCCGGGACTTCATCAACCAGTACTACAG  
CTCCATTAAGAGGTGACAGCTTCCCGGACGCCACAGCCTCCCTTGTCCCCTGAGGCC  
CCAGAAACCCCGTGACGACCTTCC

>2052

GTTGCGGGCTAAGCAGGCCTGGCGCAACGCTCCCCGCTGCGTGGGCCGGATCCAGTG  
GGGGAAGCTGCAGGTGCGGCTGGCCAGCGACTGAGAGACCCGGGCGCTACCAAAAG  
GGGAGCGGGGTGGCGGGGCAGTTCCTA

>2053

GGTCTGCACAGGAAATGTTACCTACATCTGCAACCACATCAAGTATGCCACCAACCG  
GGGCAACCTTCGGTGAGTGCCCCCACCATGCCAGGCCCCAGCCTTCTTCCCCAAGGC  
AGGGAAGGCGGGGCTCTGACCAGC

>2054

GCGCTACGCGGGCTACCGGCAGCAGGACGGCTCTGTGCGGGGGGACCCAGCCAACGT  
GGAGATCACCGAGGTGGGCACCGAGGGCCACCCATGAGGGTGTCCCCAAGGTGGAGA  
ATGAGGAAACCAGTGGGAGAAGGCTC

>2055

CAGATGAGCCCCAGAACTCTTCCTTCTGCCCCCGAGCTGGTCCTTGAGGTGCCCCCT  
GGAGCACCCACGTGAGCACCAAAGGGATTGACTGGGTGGGATGGAGGGGGCCATCC  
CTGAGCCTCTCAAGAAGGGCCTGCA

>2056

TGGCTGGTACATGAGCACTGAGATCGGCACGAGGAACCTGTGTGACCCTCACCGCTAC

AACATCCTGGAGGTGAGGTGCGGGATGGGGCTCGGGCACCGAATGCACCTGTCCAAG  
GCAGGAGTCTGGCTCTCACTCCATC

>2057

GACCACCTCGTCCCTGTGGAAAGACAAGGCAGCAGTGGAATCAACGTGGCCGTGCT  
GCACAGTTACCAGGTGCAGAGGCCAGACTGGCCAGGAAGGCAAAGGGTTTGCATAC  
GGGGCAGCAGGGGCGGGGGATGGAG

>2058

GGGCAGCCTCACTCCTGTTTTCCATCAGGAGATGGTCAACTATTTCTGTCCCCGGCCT  
TCCGCTACCAGGTGCCCACCCTAATGGCTCTGCCAGCCTGGGCCAGCTCTAATTCTAA  
GCAGCCCCTGGGGACCTCTAAC

>2059

ACCCCTGGAAGGGGAGTGCCGCCAAGGGCACCGGCATCACCAGGAAGAAGACCTTTA  
AAGAAGTGGCCAAGTGGGTCCCCTGGGAGCCCCGCTCTCCCACACACACCCTGGGGG  
CCCCACTCTCCCCACACACCCTGGG

>2060

CGAGACCGGCCGGGCCAGAGCTACGCACAGCAGCTGGGGAGACTCTTCCGGAAGGC  
TTTTGATCCCCGGGTAGGGCTGAGCCCAGGGGAGCAGGGAGCTAGAAAGAGGGGGCT  
CTATCAGCATCTTCAGGGGTGCCCTG

>2061

CGAACACGAGACGCTGGTGCTGGTGGTAAACCAGCACATTTGGGAATGGGGATCCCCCG  
GAGAATGGAGAGGTGAGAACTTCCAGGAAAGGGGCTGCTGGGAATGAGGAGAGACT  
CAGAATTGGAGTGA CTGGGCAGGAAC

>2062

TGTCCTCTTGGCGGCGGAAGAGGAAGGAGTCCAGTAACACAGACAGTGCAGGGGCCC  
TGGGCACCCTCAGGTCAGGGCCTCACCAAGAGGGGTGCAACGGGTGGGCAAGCTGCC  
TGGGCAAACGTGGCCTGCAAAGGGAG

>2063

GCTGGGCCAGGGCGACGAGCTGTGCGGCCAGGAGGAGGCCTTCCGAGGCTGGGCCC  
AGGCTGCCTTCCAGGTGAGCCCAGCCCAGCCCCTGCTCTGACTCCTGCCCCCTGGGAT  
GCCTCCTCCTGCCTCACTCTGCCCTG

>2064

CCCAAACGGAGCTGGAAGCGCCAGAGGTACCGGCTGAGCGCCCAGGCCGAGGGCCT  
GCAGTTGCTGCCAGGTGGGCCCTGCCTCACCTAACCCGGCTGGTTCTCTGAGGCCCC  
CACACCCCGGACTAAAGCACTCTGG

>2065

ACGTGCACAGGCGGAAGATGTTCCAGGCTACAATCCGCTCAGTGGAACCTGCAAA  
GCAGCAAGTCCACGTGAGGACGACGGCTTTACCGCCCCCAACCCCTGTCTGAACA  
CCCTGACCCTGGACCCTCCTCCTCCC

>2066

AGCCGCGTGAGGACCCGCCGGCGCCCACTGAGCCCGTGGCAGTAGAGCAGCTGGAG  
AAGGGCAGCCCTGGTGAGGGGCAGCCTGGGAAGCAACAGGGCACACCAGCCCCATG  
CCCAGCCCCACCCCCGGCCCCAGGCCT

>2067

GCTCTTGCGGCTGCTCAGCACCTTGGCAGAAGAGCCCAGGGAACAGCAGGAGCTGGA

GGCCCTCAGCCAGGTTGGGGGCCACCCAATGAGGCACAGGGGCTAGAGAGACGGGA  
TGAGCTGGGGGGACCCAGTGGCAGG

>2068

AGCTCGGCACCCAGCACCCACCCAGGAGAGATCCACCTCACTGTAGCTGTGCTGGCAT  
ACAGGACTCAGGGTGAGGCAACAAGCAGGAGCAGGCCTGGCCACAGCAGGGTTGGG  
ACCGGCCCTCTCTGGCCCCTCACCG

>2069

ACTATGGAGTCTGCTCCACGTGGCTAAGCCAGCTCAAGCCCGGAGACCCTGTGCCCTG  
CTTCATCCGGGGGTAAAGTGAGATGGAGGACTTGGTGGGGAGCTGCCCAGGGTCAGGG  
TGGCAGCTTTGGTGAGGAGTGTAC

>2070

GGTCCAGGCACTGGCATTGCCCCCTTCCGGGGATTCTGGCAGGAGCGGCTGCATGACA  
TTGAGAGCAAAGGTGAGGCTGGTGACTAAAGGACTGCCTGAAGGGAGTCACACAATC  
TAGGGACAGAGGGGTGGGGCTGGAA

>2071

GAACGCCCAGCAGCGCGGGGTGTTTGGCCGAGTCCTCACCGCCTTCTCCCGGGAACC  
TGACAACCCCAAGGTGTGAGACCCTGAGGGCGCAATGGTAACCTGAAGATAGGGAGA  
GAGGGGAGGACTCGCGCTCTCCAGCG

>2072

AGAGTTGCCACCCAGGCCTCAGCCAGGACCTTTCAGGCCAGACAGGAGCACCTGACC  
AAAGGCTTCACAGGTAAGTGCCCTCCGTATTACCCAGCATGGCCTCCACAGGGAGA  
GAGGAGGTCAGTTCCTGTCCCTTTA

>2073

TGGGCACACTCCACCTTCCCTAGTCACCAGCTGGTTTCCCAGAGGAGAAGGCTGAGAC  
CCGAGAAGGGAGGTGAGTGCACCCCGTCCCATGTCAGGCTCCGCTACATCCCCAGTGC  
TTGCCGTCCCTGAGGATCGGTCCA

>2074

CCGAGGAGGAGGACAAGAAGGAGGACGTGGGCACGGTGGTTCGGCATCGACTTGGGG  
ACCACCTACTCCTGGTAAGTGGGGTTCGGGATGAGGGGGACGGGGCGTGGCGCTGGC  
TGGCGTGAGAAAGTGCGGTGCTGATGTC

>2075

CAAGCGGCTCATCGGCCGCACGTGGAATGACCCGTCTGTGCAGCAGGACATCAAGTTC  
TTGCCGTTCAAGGTTTCGACCGGTTTTCTCATCCAGTTAGAGAACGGGTGGGTGGTGG  
GAGTATTTAGAGTTATAAGTCTCT

>2076

TCCTGAAGAAATTTCTGCCATGGTTCTCACTAAAATGAAAGAAACCGCTGAGGCTTATT  
TGGGAAAGAAGGTAAATATTTCTAGAACAAATGTTAAGTATTTTTTGATCATTAGTATTCT  
CGGTTGGCTGTTATGTATAGA

>2077

CCCAACGCCAAGCAACCAAAGACGCTGGAACCTATTGCTGGCCTAAATGTTATGAGGAT  
CATCAACGAGCCGTAAGTATGAAATTCAGGGATACGGCATATTTGCCAAATAGTGGA  
TGTGAAGTACTGACAAAACCTTTT

>2078

TGAGTCCTTCTATGAAGGAGAAGACTTTTCTGAGACCCTGACTCGGGCCAAATTTGAA

GAGCTCAACATGGTATGTTTCCTTGTTTTCTGCTTTGCTAATGAGATCTCCTTAGACTCTG  
AATTCAGGACATTGCATCTAGA

>2079

AACCCAGATGAAGCTGTAGCGTATGGTGCTGCTGTCCAGGCTGGTGTGCTCTCTGGTG  
ATCAAGATACAGGTAGGTCATCATCGCAGCATCTTTCTTAGTGATTGATTAGCTTGATGG  
AAGAGCTCGGTACCCCTATTGC

>2080

ACCAAGAACTCTCAGATCTTTTCTACAGCTTCTGATAATCAACCAACTGTTACAATCAA  
GGTCTATGAAGGTAATTACCTTAAGTTTGGTTAATATCATGGCTTTTTTTTTTGAGATGAA  
GTCTTGCTCTGTTGCCCAGGC

>2081

AGGCCTGTCTGCAGAATCGACACCAACCAGCATCATGTCCATGACACTGGGGTACTGG  
GACATCCGCGGGGTGAGTGAGGGTCCGCTGCACTGTGGGACCGGGCGCGTGGGCGGG  
AAGTGCCGAGCGGCTGGGGACCGGC

>2082

CACGCCATGCGCCTGCTCCTGGAATACACAGACTCAAGCTACGAGGAAAAGAAGTATA  
CGATGGGGGACGGTAATGACACCCTTGTTGTCCGGGCTCTGCCCACTCACGCTGAGTTG  
GCACCAAGCAACCCATGGTGGCCA

>2083

ATTGATGGGGCTCACAAGATCACCCAGAGCAACGCCATCCTGTGCTACATTGCCCGCA  
AGCACAACCTGTGTGAGTGTGGTTGGCTGCAGTGTGTGGGGGAAGGTGGCATCCTC  
CTTGGCTGGATTGGGGTGCTATGCT

>2084

GGACATTTTGAGAAACCAGGCTATGGACGTCTCCAATCAGCTGGCCAGAGTCTGCTAC  
AGCCCTGACTTTGTGAGTCCCTCCCTGGTCTGGACCAGAAGCCAGGCTTGTATTCCCAT  
CTACTCTGGTCCTATTCACAATT

>2085

GGAACCTCCTACAATGATGCAGCACTTCTCACAGTTCCTGGGGAAGAGGCCATGGTTT  
GTTGGAGACAAGGTAATGGGGGCATGTGATGAGGACACTAGAGATTGCCATACATCC  
TATGTTACAGAGATTCCAGCCCAC

>2086

CCACCGTATATTTGAGCCCAACTGCTTGGACGCCTTCCCAAATCTGAAGGACTTCATCT  
CCCGCTTTGAGGTGATGCCCCCATCCTCCTTTCTCTTTGATGCCCTTGTTCCGTTACCT  
CCTTTCAGATGCTTTCCAGT

>2087

GGGCCAGAGCTGGAAGGAGGAGGTGGTGACCGTGGAGACGTGGCAGGAGGGCTCAC  
TCAAAGCCTCCTGCGTAAGTGACCATGCCCCGGGCAAGGGGAGGGGGTGCTGGGCCTT  
AGGGGGCTGTGACTAGGATCGGGGGAC

>2088

AAGTTCAGGACGGAGACCTCACCCCTGTACCAGTCCAATACCATCCTGCGTCACCTGG  
GCCGACCCCTTGGTGAGTCTTGAACCTCCAAGTCCAGGGCAGGCATGGGCAAGCCTCT  
GCCCCCGGAGCCCTTTTGTTTAAA

>2089

GGTGGACATGGTGAATGACGGCGTGGAGGACCTCCGCTGCAAATACATCTCCCTCATC

TACACCAACTATGTGAGCATCTGCACCAGGGTTGGGCACTGGGGGCTGAACAAAGAA  
AGGGGCTTCTTGTGCCCTCACCCCC

>2090

GCAACTGAAGCCTTTTGAGACCCTGCTGTCCCAGAACCAGGGAGGCAAGACCTTCATT  
GTGGGAGACCAGGTGAGCATCTGGCCCCATGCTGTTCCCTCGCCACCCTCTGCTTC  
CAGATGGACACAGGTGTGAGCCA

>2091

GGATCTCACCGTGGGTCCGATTAGCCTTTTCTCTGCCTTGCTTGCTTGAGCTTCAGCGG  
AATTCGAAATGGTAAACTTCGCAGAGACGCTCGATGACTCCGCGGGTTTTTGCCGGCG  
AGAGAAAAACCCGTTACACAGAG

>2092

TAAGGCTGGAAAGGACTCCGGAAAGGCCAAGACAAAGGCGGTTTCCCGCTCGCAGAG  
AGCCGGCTTGCAGGTCAGTAGTTGTTCTGTGCAGTCTGGGAGTCATGATGTTTTTCTTTG  
CATTTCTTTTTTTGTTATTCATCG

>2093

CAGTCATGGACGTGTGGGCGCGACTGCCGCTGTGTACAGCGCAGCCATCCTGGAGTAC  
CTCACCGCAGAGGTAAATGGGTGAACGCCTATAATCCGGAGAAGGTTTGGGGGGCGG  
GGAGGCGGCAAGAGGGAAGGAGGAA

>2094

CACTTGCAACTTGCTATTCGTGGAGATGAAGAATTGGATTCTCTCATCAAGGCTACAAT  
TGCTGGTGGTGGTATGTAACTTCTAACATTTTAAAAAATTTCTTCAGAGGAAGGAATT  
TTTTGCTGCTTTTAATTAGTTT

>2095

AACGGCAAGCTTGAGTCAGGACCCTTAATTAAGATCCTCAATTGGCTGGAGGGCAGAT  
CTCGCGAGTAGGGTACAAGGCACTATGAAATGATCTAGTTTCGTGGGTGAGGGGCTGA  
AGGGCCTATGATGCACGGAGGCGG

>2096

TTCGTAACGGGAATGCCGAAGCGTGGGAAAAAGGGAGCGGTGGCGGAAGACGGGGA  
TGAGCTCAGGACAGGTAAGGGAATGAAATCAGCCCTTCTTCCTAGAAGCTGCGGCGG  
GGGTGTTTGTTCATTCCCTTGATGTACG

>2097

TGCCACACTCAAGATCTGCTCTTGGAATGTGGATGGGCTTCGAGCCTGGATTAAGAAG  
AAAGGATTAGATGTGAGTGGAATTTGAGGGAAAGAGACATTTTTTAGTATTGAATGGTC  
TTAGGGTTTAGTCACCCCTTTTC

>2098

GACAAGGAAGGGTACAGTGGCGTGGGCCTGCTTTCCCGCCAGTGCCCACTCAAAGTT  
TCTTACGGCATAGGTGAGACCCTATTGATGCCTAATGCCTGAACTCTTCAAAACCAATT  
GCTAATTCTCTATCTCTGCCCCAC

>2099

GCCCAACGCGCTGTCCGCCCTGAGCGACCTGCACGCGCACAAGCTTCGGGTGGACCC  
GGTCAACTTCAAGGTGAGCGGCGGGCCGGGAGCGATCTGGGTGAGGGGCGAGATGG  
CGCCTTCCTCTCAGGGCAGAGGATCA

>2100

AGAAGTCTGCCGTTACTGCCCTGTGGGGCAAGGTGAACGTGGATGAAGTTGGTGGTG

AGGCCCTGGGCAGGTTGGTATCAAGGTTACAAGACAGGTTTAAGGAGACCAATAGAA  
ACTGGGCATGTGGAGACAGAGAAGAC

>2101

CAAGGGCACCTTTGCCACACTGAGTGAGCTGCACTGTGACAAGCTGCACGTGGATCCT  
GAGAACTTCAGGGTGAGTCTATGGGACCCTTGATGTTTTCTTCCCCTTCTTTTCTATGG  
TTAAGTTCATGTCATAGGAAGG

>2102

CAAGGGCACCTTTGCCCAGCTGAGTGAAGTGCCTGTGACAAGCTGCATGTGGATCCT  
GAGAACTTCAAGGTGAGTCCAGGAGATGTTTCAGCCCTGTTGCCTTTAGTCTCGAGGC  
AACTTAGACAAGTGAAGTATTGATC

>2103

ACAAGGCTACTATCACAAGCCTGTGGGGCAAGGTGAATGTGGAAGATGCTGGAGGAG  
AAACCTGGGAAGGTAGGCTCTGGTGACCAGGACAAGGGAGGGAAGGAAGGACCCT  
GTGCCTGGCAAAAAGTCCAGGTTGCTTC

>2104

CGCTGGTGCGCGCCCTGTGGAAGAAGCTGGGCAGCAACGTCGGCGTCTACACGACAG  
AGGCCCTGGAAAGGTGCGGCAGGCTGGGCGCCCCCGCCCCAGGGGCCCTCCCTCCC  
CAAGCCCCCGGACGCGCCTCACCCA

>2105

ACCCACGCGCTGTCCGCGCTGAGCCACCTGCACGCGTGCCAGCTGCGAGTGGACCC  
GGCCAGCTTCCAGGTGAGCGGCTGCCGTGCTGGGCCCTGTCCCCGGGAGGGCCCCG  
GCGGGGTGGGTGCGGGGGGCGTGCGG

>2106

TGAAGCTGCAAGTATTTCTCATTGTGCTCTCTGTTGCATTGAACCATCTGAAAGCTACA  
CCCATTGAAAGGTTGGTAACGTTTAAATCCTGTTTCTTTGTAAGTCTTTGTAAAGTGTG  
AGAAAATTAGCATTAATACTG

>2107

GAAGAAGGCGGGTGGCGGGGGTGGCAAGAGGAAGGAGAAGCTGGAGAACATGAAG  
AAGGAGATGGAGATTGTGAGCTCTGACTGGGGAGGGGCGGGAGCTGGAGGGTAGGCT  
GGGAACCAGGCAGTGGGCGGGGAGGGGG

>2108

TGCCGCCGCCATCTGCCTCATCGCCTTTGCCATCCAGGCTAGTGAGGGGGACCTCACC  
ACCGACGACAATGTGAGCCATGTTGTGGGGACAGGCTCAGGACATGGGGACCTGGGG  
ATGGAAGACACTGAGCCTGGGACTT

>2109

CTGCTTTGGCTACTACCAGGAATTCAAGAGCACCAACATCATCGCCAGCTTTAAGAAC  
CTTGTCACAGGTGGGTTCCCCAGCACCCAGCCACTCCAGATCCCAGAGACTCCAAA  
CTGCTCCTGTAGCCTCCTTCCATC

>2110

CCCGAGTGACGCACGAGAGCCCTCTGGAGACCCGCAACATCGCCTTCTTCTCCACCA  
TGTGCCTTGAGGGTCTGTGAAGCCCCCGCCTGCCTGCCAGTAACTGCTGCCTCCACT  
GCCTCTCTCCTGCTATCTTCTAG

>2111

GCGGGCCATGGTCTTCTTCATGGCCATCGTGCTGGCCTATGTGCCTGAGGGGCTGCTGG



CCACTGTCACAGTGAGTGGGGGCAGGCGGGGATGCAGGGAGCTGAGGGGCCTGCTCA  
ACCATCTGTTCTTTCTCCACATT

>2112

CGCATGACTGTGTCCCATCTGTGGTTTGACAACCACATCCACACAGCTGACACCACGG  
AAGACCAGTCAGGTGTGGGGGAGGGAGGGCACAGGCGCCAGGGCAGGATCTGGTGG  
ATGGTGGAGACCTGAAGAGGGATAGG

>2113

GTGCCGGGTGCTCACCTGTGCAACCGCGCCGCTTCAAGTCCGGCCAGGATGCAGTG  
CCTGTGCCCAAGGTGAGAGCCAGGGGGCCTCCAGGGAATCCCGGGAGGCTGGTGTAG  
CCGGCTTCGCCCCTGACACCGGTCC

>2114

CGCCATGGGCTACCGGGACCGCTTCCCAAAAGTCTGCGAGATACCCTTCAACTCCACC  
AACAAGTTCCAGGTGCGCAGCCGGCCCCGCCACGGCCTGGGCCCGCCCACCTCGGG  
CCCCGCCCCAGGCCACACCCACATC

>2115

GACGAGCAGTGGCGCGAGGCCTTCCAGACCGCCTACCTCAGCCTGGGAGGCCTGGGC  
GAACGCGTGCTCGGTGAGACCCCTGGGCAGGGGAGGAGACTCCAGGTGCGAGGAGG  
AGCTAGCACAGACCCTGCCCACCACTC

>2116

ATCCATGATTGACCCACCCCGGGCCACCGTCCCTGATGCTGTGCTCAAGTGTGCGACC  
GCAGGCATCCGGGTATGCCACTGTGGGGAGGAACAAGTGGAGTGAGGACAGAGGATG  
GCAGCAGGATTTGGGTTGAAGAACC

>2117

CGGAAGGCAGCGAGACAGTGGAGGACATCGCTGCCCCGCTCCGTGTGCCCGTAGACC  
AGGTTAATCGCAAGTAAGCCCCCCCAGACCTCCCCGGGGTTCTCCCCACATCTGGCAC  
AGACCGAGGTCCCAGCGAGGTCCTC

>2118

CCCCGAGATGGTGTTTTCGCGCACCCAGCCCCCAGCAGAAGCTGGTGATCGTGAGAG  
CTGCCAGCGGCTGGTGAGCCCTGCTGATGAGGGTGGGCAGGCGGGCAGACAGGCGGG  
GCTGGTCTTGGAACCGGCCTCTCACTG

>2119

GCCAAAATGCAGCTGACATGATCCTGCTGGATGACAACTTTGCCTCCATTGTGACAG  
GCGTGGAGCAGGGTCCGAGCCACGCCAGGGGGAGGGCAGGCAGTGTGGGCACAGGA  
GGGAGAGGGCTGTGAGGAGGCTGAGG

>2120

CATCACCGTCAGCGTGCCCCTGCCCCTCGGGTGCATCACCATCCTCTTCATCGAACTCT  
GCACTGACATTGTAAGTCCACAGCCCAGGGTACCCATCCACAGGGTGCCCAGAGACAC  
TTGCCTGCAGATGGACAGGAGGG

>2121

CGTCCACGCAACCCAAAGCGTGACAGATTGGTCAACGAGCCCCTGGCTGCCTACTCCT  
ACTTCCAGATTGGTGGGTGCCCGTGGGCCGGGGAGCCTGGAGGTGGGGGGCTCTGCG  
CTGGGCTGCTCGCCTGCCCCAGGCC

>2122

CGTGGGGCTGCGGGCGCAGTGGGAGGACCACCACCTACAAGATCTGCAGGACAGCTA

CGGCCAGGAGTGGGTGAGCCCTGCCCCGCCCCATCCCATCCCTGGGCTCCCTCCTTCC  
CAGGGCAACTTGCCTTGTGTGCGGC

>2123

TGTGCCAGATCGCCGATGTCCTCATCCGCAAGACGCGCCGTCTCTCTGCCTTCCAGCA  
AGGCTTCTTCAGGTGTCCCTGGCTGGCCCTCTTCCTGCCCTCCAACCCCTGGTCCCAAC  
TCCCATCAGATCCTGACTGTGGT

>2124

AGGTCTGCATCGGCTGCTTCCTGTGCTACTGCCCCGGCATGCCCAACATCTTCAACTTC  
ATGCCCATTCGGTGAGAGGCTGTGAGGGGCAAGGACAGGGAGGGGGCTGTAGGGCAC  
AGGCCTGGGATGGCCTTCACCTTG

>2125

CTGCCCTACGGCATCCTCATCTTCGTCTATGATGAGATCCGGAAGCTTGGAGTTCGCTG  
TTGCCCAGGGAGTGAGTGTGGAGACTGGGAGCCTGGGGGCAGGGGACTGAAACGTTT  
GAGCAGCTGCACCCACCTTTGATC

>2126

CTCGGGTGGAGTCTTCTGACAGCTGGTGCGCCTGCCCGGGAACATCCTCCTGGACTCA  
ATCATGGCTTGTGTGAGTGTGGGGACCCCCCCCCAAGGTCCAGGGGATAGGGCAGGA  
ACTGATGGCCAGAGGAGAGCTGGGC

>2127

CCAGCAACCTGAATCTCAAACCTGGAGAGTGCCTTCGAGTGCGAGGCGAGGTGGCTC  
CTGACGCTAAGAGGTGAGAAGTGAAGTCGGGGTGGTGGGCGGCAGGGACGGGCTTG  
GTCCAGCAGGGAGGGCGTGGCCGGCCA

>2128

GGACGGCGGGGCCTGGGGGACCGAGCAGCGGGAGGCTGTCTTTCCCTTCCAGCCTGG  
AAGTGTTGCAGAGGTGGGCTGCAGACCGGAACCGGGGACCAGGGACAGGGGCTGGG  
TGGGCTGGGGCGGGGCTGGGTTAGTGA

>2129

GGCCGAAGTGGCTAACCAAGAACTAAAGAAGACTTACCTGCGGAAAACGGGGAAA  
CGAAGACTGAGGAGGTCAGAAGTGTGTGTGTGTGTGTGTGTGTGTGTGTGTGTGTG  
TGATTGCTTTGACTCTGAACAGTAGT

>2130

CAAGAAGAAACACCCGGACTCTTCCGTCAATTCGCGGAATTCTCCAAGAAGTGTTTCG  
GAGAGATGGAAGGTGAGGCAGGAGAGGGACGGAGCTCAGGGGGTGCAGGTGTGGTT  
TTCGGCTAGGAGGGCCTTAGGCAGGT

>2131

AAAATTACGTTCTCCCAAAGGTGATAAGAAGGGGAAGAAAAAGGACCCCAATGCTC  
CTAAAAGGCCACCGTAAGTTTAAATAACCCAAATTGCTCCTTGGAATTTTCCTTCAGT  
TTATTAACTCTGTTGCTTCCTTT

>2132

TGAGCAGTCAGCCAAAGATAAACAACCATATGAACAGAAAGCAGCTAAGCTAAAGGA  
GAAATATGAAAAGGTACAGTGTCTCTTTTTTAAAGCCGTGGATAAGACTAGGTATAGG  
TAATAACTGTAGAAAACCTGGGAA

>2133

AGCCCAGGGACAACCTGCCGCCCCAGCGCCTCAGAAGAGAGGACGCGGCCGCCCA

GGAAGCAGCAGCAAGTCAGTACGAGGGCGCGGTGGGGGCACCAGCCCACCCCGTCCC  
CACTGCCGGGGCCCAGACACGCGCGGG

>2134

CTCTCCTAAGAGACCCAGGGGAAGACCCAAAGGCAGCAAAAACAAGAGTCCCTCTAA  
AGCAGCTCAAAAGGTGAGATTTCTCAAGTCAAGCTCTCCTAACTTCATCAATGACTGA  
CTACAGGAGCCTGCCTGTAAC TTTC

>2135

GCCGGTGCTGCGCTCCTCTAATTGGGACTCCGAGCCGGGGCTATTTCTGGCGCTGGCG  
CTCCAAGAAGGCGTGAGTTCGCGGCCGCTCCGGTGGCTTCTTTTTTTTATATCTATAATT  
TAATTAAATTATTTATTTATTG

>2136

TCCTCAGCGCCCAGCACCGCCGCTCCCGGCAACCCGGAGCGCGCACCGCAGGCCGGC  
GGCCGAGCTCGCGGTGAGTCGTCCCCGGGGCCCCGCGGCGGCGGCGGCGGAGGGGGG  
CGCCCGCGCCCCGCCCCACGTCGCCCC

>2137

GGCGGGGAGAGACACGGGCTGCGGCGCGGCAGGAGAGTGGGGGGTTCGGGCGCCCCC  
CGCAGCTCAGGGAAGTTCTGGAAGTGAGGGAGATGGGGAGGAACCCCCAAATTCGGC  
CCTACGCCCTCTCGGCCTTTCTCTCGC

>2138

GGTCTCGAACTCCTGACCTCAAGCAGTCCTCCTGCTTTGGCATCCCAAAGTGCTGGGA  
TTACAGGCATGAGTCACCTCACCTGGCCATAAATCATTTTCAAATGGTCTAGTTCTTAT  
TTTGGT TAGAGTGAAGATTCT

>2139

GAAGCGGGGCCGGGGCAGGCCGCGCAAGCAGCCTCCGGTGAGTCCCGGGACAGCGC  
TGGTAGGGAGTCAGGTGGGTGTCCAAACCTTTGCTTCACTTGGT TTACCTTTGGGGCT  
AGGGAGGTGCCTGGAGTTTCATTCA

>2140

AGTGCCAACACCTAAGAGACCTCGGGGCCGACCAAAGGGAAGCAAAAACAAGGGTG  
CTGCCAAGACCCGGGTGAGACTTGAGATGGGACTACCCCTGGGTGGATGACTAGCAG  
AGGATCCTCTTGTTGGCACCATGGCCA

>2141

GAGCCGAGCCCGGCGCCGCCCGCCCAACCCAGATCTACCCCTGGATGCGCAAGCTGC  
ACATAAGTCATGGTAAAGCCAGCCTTTTTCTAAATCCACGCGACCGCGGGGACGCGGC  
TCTCGGTCCCCCTCTCTTCTCTG

>2142

AAGCAGATCTTCCCCTGGATGAAAGAGTCTCGACAGAACTCCAAGCAGAAGAACAGC  
TGTGCCACTGCAGGTAGCTCCCTGAGGTGGCCTACTGCCAGACCAAGCCCCCTCCAGA  
TTGACCCAAGGAAGCCTAGTCAGGG

>2143

AAGACATCGGGGACATTCTGCAGCAGATAATGACCATCACCGACCAGAGCCTGGACGA  
GGCCAGGCCAAGTGAGTGCCCCCACTCCGGGACCCACACAGACCCAGCAAACCC  
GTTACATGTTCTGAATCTTCTGGG

>2144

CACGCCCTAAACTGCCACCGAATGAAGCCTGCTCTCTTTAGCGTCCTGTGTGAAATCA

AGGAGAAAACCTGGTATGTGGGCGCCCCCGGATTGCTCAACTCTGGGAACAGAACCC  
TGTTCATTATAGGGCTAGAGTGTGA

>2145

CTCGGACTATCGCAGCAAACCTTGCCCAGATCCGTCACATATAACCACTCGGAGCTGGAG  
AAGTATGAGCAGGTAAGGAGAGGAGGCTTGGGTGGGTGGAGGGAAGGGCTCTTGCAG  
GGGAATCCCATGGTCAAAGGGCTCC

>2146

TCCAGATGCAGCTGAAGCAGAGCACCTGCGAGGCTGTGATGATCCTGCGCTCCCGTTT  
CCTGGATGCCAGGTGGGCCCAGGGACCCCAGGCTGGCCCCCAGCACTGGGCTCCTTC  
CCATTCTCTCCAAGACCCTGAGCT

>2147

GAGTAACCCATATCCTAGTGAGGAGGCCAAGGAGGAGCTTGCCAAGAAGTGTGGCATC  
ACCGTGTCTCAGGTATTATGGAGGTTGCGGGAGGAGTTGTCAGGCAAAGTGCACGCAT  
CTCAGCTAGGTGCAGTGGTGTGTT

>2148

AAGACCGCCGTGTGTCAGTCACCCAGGGGGGCCACAGCCGCACCAGCTCCCCGACACCC  
CCTTCCTCTGCAGGTGGATCCCACTGTACCCCGGCTGTTTTGCACACTTCCTGCTTTT  
GTTCCCACTTCCTATCTAGGCAGG

>2149

TCTCTCAGGATCTGGAGACATGTTTCTGGGGATGCCTGGGCTCAACGGAGATTCTTATT  
CTGCTTCCCAGGTCAGATGCCCATCTCCTCTCGAATAGGGCTTCCCCAACTCCATTTC  
CTCTACTTTAGGATAACAAGACC

>2150

CTCGATGGGGCCAGGGGGCTATGGGGATAACCTCGGGGGAGGCCAGATGTACAGCCCA  
CGGGAAATGAGGGTGAGTGGATCCTGAAGCTCCTCTCTGTCCAGTTCTCACAGGACAG  
AGGGGCATTTTCCCTAGTAATGTT

>2151

TGGCGAGCCACTGGTGCTGAAGTGTAAGGGGGGCCCCCAAGAAACCACCCAGCGGCT  
GGAATGGAACTGGTAAGCGGGGCTCCTGTTGCAGCCTCCCAACTTCCAGGGAGACC  
AGCAATGATTTGGATCCCCGTCACCTC

>2152

ATTTTCCGGTGCCAGGCAATGAACAGGAATGGAAAGGAGACCAAGTCCAACCTACCGA  
GTCCGTGTCTACCGTAAGAATTCCAGGGTCTTCTCCAAGGCCTCCCTCTTACCTAAGAA  
AAAGCCTTCAACCCCAGCCTTGGC

>2153

GAGGGAAGCTACCCTGCAGGGACTCTTAGCTGGCACTTGGATGGGAAGCCCCTGGTG  
CCTAATGAGAAGGGTGAGTCCTAAGGTGCCCCCAAGCTGCCTTCTCCCTGATCTCAC  
TCCCACACCCACCCTGGGATAATTT

>2154

TGTAGCTTCAGCCCAGGCCTTCCCCGACACCGGGCCTTGCGCACAGCCCCCATCCAGC  
CCCGTGTCTGGGGTGAGCATAGGTGGGGAGGGCCCCAAGCTCACGTGAGCACGTTCT  
GGAAGTCTGACCCTTAGGGAAAGAG

>2155

TGGTGGAACCGTAACCCTGACCTGTGAAGTCCCTGCCCAGCCCTCTCCTCAAATCCAC

TGGATGAAGGATGTGAGTGACCTGGAGAGAGGGGCTGGGAGGTAGGGTGAACCATAA  
CTAGCAACAGGGAGGGCAGAGGGCT

>2156

TACAGCTGTGTGGCCACCCATTCCAGCCACGGGCCCCAGGAAAGCCGTGCTGTCAGCA  
TCAGCATCATCGGTGAGACCTCTCCCAAGCCCTACAGACCCTGGGACTAGGGTGCAG  
GACAGCACAGGCTCTAATTTCTG

>2157

GCCTGGGGACAGCCGCCCTGCTCATTGGGGTCATCTTGTGGCAAAGGCGGCAACGCC  
GAGGAGAGGAGAGGTGAGTGGAGAAAGCCAGACCCCTCAGACCTAGGGCTTCCAGG  
CAGCAAGCGAAGAGGGGTCGGGGGGTG

>2158

GTCATTGCCCTCCTGCTCTGGGGACAGCTTTTTGCAGTGGACTCAGGCAATGATGTCAC  
GGATATCGCAGGTCAGTCTTTGGTTGGGTAGGAGTGTGCATCCCACTCTGACCCTCTCG  
GGTCTGCACTCTCTCTGAGAAC

>2159

CATGGCTATGTGGAGCACTCGGTTTCGCTACCAGTGTAAGAACTACTACAACTGCGCA  
CAGAAGGAGATGGTAAGATGTGGACAACGTCTCCATGCCCTACATACAACCCCTTCT  
CTGACATTTCCATGATGGGTGGT

>2160

TACACCTTAAATGATAAGAAGCAGTGGATAAATAAGGCTGTTGGAGATAAACTTCCTGA  
ATGTGAAGCAGGTGGGTGCTGAGCACTGAGCACTTAAGAGAGCAGGCAGGCGTCCAG  
CGGGGAACGTCCTAGAGGCACAGC

>2161

CATGGCTATGTGGAGCACTCGGTTTCGCTACCAGTGTAAGAACTACTACAACTGCGCA  
CAGAAGGAGATGGTAAGATGTGGACAACGTCTCCATGCCCTACATACAACCCCTTCT  
CTGACATTTCCATGATGGGTGGT

>2162

TACACCTTAAACAATGAGAAGCAGTGGATAAATAAGGCTGTTGGAGATAAACTTCCTG  
AATGTGAAGCAGGTGGGTGCTGAGCACTTAAGAGAGCAGGCAGGCGTCCAGCGGGGA  
ACGTCCTAGAGGCACAGCCTTCCAG

>2163

TTTGCATACCTAATCATTATGCTGAGGATTTGGAAAGGGTGTTTATTCCTCATGGACTAA  
TTATGGACAGGTAAGTAAGATCTTAAAATGAGGTTTTTACTTTTTCTTGTGTTAATTT  
AACATCAGCAGCTGTTCTG

>2164

AGCACTGAATAGAAATAGTGATAGATCCATTCCTATGACTGTAGATTTTATCAGACTGAA  
GAGCTATTGTGTGAGTATATTTAATATATGATTCTTTTATAGTGGCAACAGTAGGTTTTCTT  
ATATTTTCTTTGAATCTCT

>2165

CTGGCAAAACAATGCAGACTTTGCTTTCCTTGGTCAGGCAGTATAATCCAAAGATGGTC  
AAGGTCGCAAGGTATGTATGACATTTTGACACAGAATATTTTCTCATTTGAAGGGGA  
TTAAGTGATTGCTTCTTTTAA

>2166

ATTTGAAATTCCAGACAAGTTTGTTGTAGGATATGCCCTTGACTATAATGAATACTTCAG

GGATTTGAATGTAAGTAATTGCTTCTTTTTCTCACTCATTTTTTCAAAACACGCATAAAAA  
TTTAGGAAAGAGAATTGTTT

>2167

GAGAAGGAACTGAAGGAGATCAGGGCCTTGGACAAGGCCTTCAGACCAGAATTGAGA  
GAGGAATTTTCTAGTAAGTAACTTGAGTCATGGGTCTGTGGCTCCATCTTAAACTCTG  
CATGGGTGTGGGGAGGTTGACCTT

>2168

CACACCGCCTGTATCATTGATGTCTTTGGTGTCACTCACAGAGAGTCCATCATGAATGT  
CAATGTGAAAGGTACAGTAGCCTGGGGAGGAGATAAAACAAGTTGGTTAAATGAGGAT  
CAGAAAGAAGGACAAGAAAGGGA

>2169

GCAAAAGTGGATGAGTTTCCGCTTTGTGGCCACATGGTGTGATGAATATGAGCAGC  
TGTCCTCTGAAGGTAAAGGCAGGATTCTTTGTTTCGTCACCCCCCAGTCCTTCTCCGTGC  
TCCCTCAACCCCAACCCACATACA

>2170

TCCGGGTGCGGCTCCACCCCTTCCACGTCATCCGCATCAACAAGATGTTGTCCTGTGCT  
GGGGCTGACAGGTGAGCTTGGTCTGGGCCTTTTAAGGCAGTTGGAGTCTCTACATTATT  
AGGCTTGCAATTATTTATCAGA

>2171

GCTGCAGAACAAGGAGCATGTGATTGAGGCCCTGCGCAGGGCCAAGTTCAAGTTTCC  
TGGCCGCCAGAAGGTATGTAGTGCTGCAGCCCCCTTCTCCACCTTTGCCCCAGCCTCC  
TGAATCAGTTCTTTCCATTGCTCC

>2172

ATTGATCATCAATACTTTCTACTCGAACAAAGAGATCTTTCTGAGAGAGCTCATTTCAA  
ATTCATCAGATGTAAGTCACTTATTAACCCAGAATCGGATTTTGGTTTCAGTGTGAACTT  
CTTGGGGGTGCTGTATGCTTA

>2173

CATAACGATGATGAGCAGTACGCTTGGGAGTCCTCAGCAGGGGGATCATTACAGTGA  
GGACAGACACAGGTAGGCACCTGAACATTCATCTGGTTAAGTGAGCGGTGGAAGGGTG  
GGGTGCTGCAACCCTTGGATCCCTG

>2174

GGAGGAACGAAGAATAAAGGAGATTGTGAAGAAACATTCTCAGTTTATTGGATATCCC  
ATTACTCTTTTTGTAAGTTTTATGTAATTGCAGAGTGAATTTCTGTCTGTAGGTGATTG  
GGGTGACTGTACTACATCCTTA

>2175

TACTAATGAGGAGTACGGAGAATTCTATAAGAGCTTGACCAATGACTGGGAAGATCAC  
TTGGCAGTGAAGGTGAGTGACTGATGGGTGCTTCAAGCTTGTCTTAGATTATCATCTT  
TCTCCACCACCCCAAATATCTTC

>2176

AACATCAAATTGTATGTACGCAGAGTTTTTCATCATGGATAACTGTGAGGAGCTAATCCC  
TGAATATCTGAGTAAGTATAGATAGGAAAAATAATCACTGTCACTGATTAAAGAAGTAC  
TTTCTGGGTGGGCATGGTGGCT

>2177

CTTTACTGAACTGGCGGAAGATAAAGAGAACTACAAGAAATTCTATGAGCAGTTCTCT

AAAAACATAAAGGTTGGTGTAATAACCATTAGTTTTCCAATTGGCCTCTTTAGTTTTTT  
TTTTTTTTTTTAAATCAGAAA

>2178

GAGATGGTTTCTCTCAAGGACTACTGCACCAGAATGAAGGAGAACCAGAAACATATCT  
ATTATATCACAGGTAAGAGAACACTATGTTACAGTCATACACGTCGTTCTTACAACCTTG  
TAGGCTCTGTGGGTGTGTTTTTC

>2179

AGAGAAAAAAACAAAGTTTGAGAACCTCTGCAAAATCATGAAAGACATATTGGAGAA  
AAAAGTTGAAAAGGTATGTGAATACAGCATTTCCCTGATCATTGATACTTCTAAGGTGCT  
TTCAAGCTTAGTCATACATAGCCC

>2180

TCTGGCTTCAGTCTGGAAGATCCCCAGACACATGCTAACAGGATCTACAGGATGATCA  
AACTTGGTCTGGGTAAAGCCTTATACTATGTAATGTTAAAAAGAAAATAAACACACGTGA  
CATTGAAGAAAATGGGTAAACTT

>2181

CCTCATCATCAATACCTTCTATTCCAACAAGGAGATTTTCCTTCGGGAGTTGATCTCTAA  
TGCTTCTGATGTAGGTGCTCTGGTTTCCACATTTGGCATGGTTTTTTTTTTTGATACTCTA  
GAAGGAGGGGAAAGGAGTG

>2182

AGCTGATCTCATAAATAATTTGGGAACCATTGCCAAGTCTGGTACTAAAGCATTTCATGG  
AGGCTCTTCAGGTATTGCAGTTCTGTAGGCATTCATACTTATCTGTGTTCTTTGGTTTTTT  
GCTTCTTTAAAACTTGTGAT

>2183

CACAACGATGATGAACAGTATGCTTGGGAGTCTTCTGCTGGAGGTTCCCTTCACTGTGC  
GTGCTGACCATGGTAAGTTAGCTTTTCTGTTACAAGGTAGTTGGGTAGGATTTTCTGG  
GCTCACACCAGTAGCAGAAATTT

>2184

AGAAGAGAGGCGGGTCAAAGAAGTAGTGAAGAAGCATTCTCAGTTCATAGGCTATCCC  
ATCACCTTTATGTGAGTATGGACTTTTAAATCTTTTACACTTAACGTGCAGGATGTTTC  
CTGTTCTGGAGAATCTCATTGT

>2185

CACCCAAGAGGAGTATGGAGAATTCTACAAGAGCCTCACTAATGACTGGGAAGACCAC  
TTGGCAGTCAAGGTGTGAGAAGCCTTTGCATGTTGGCTCAACATGCACATATGGAGAG  
GAATGAGTTAGGTGGAAGAGTGTT

>2186

AACATCAAACCTCTATGTCCGCCGTGTGTTTCATCATGGACAGCTGTGATGAGTTGATACC  
AGAGTATCTCAGTGAGTATCTCCTTGGCCTAATTTAGTTGGGTGAAGTCTTGGGAGGTT  
TTAGGCATTCTGCTAGGATATT

>2187

CTTCTCTGAGCTGGCAGAAGACAAGGAGAATTACAAGAAATTCTATGAGGCATTCTCT  
AAAAATCTCAAGGTAAAAAGGCAAATAATGCTTATTCCTTTACCACTTTCTTAGTAATA  
ACAATAAATTATTCCATTCACA

>2188

GAGATGACATCTCTGTCAGAGTATGTTTCTCGCATGAAGGAGACACAGAAGTCCATCTA

TTACATCACTGGTGC GTT GACTCTGATTGAAGCCTTTTTGGAGGAGTGGGGAGCACAA  
TTAGGGCTTCCTGGGA ACTGGCA

>2189

AGAGAGCAAGGCAAAGTTTGAGAACCTCTGCAAGCTCATGAAAGAAATCTTAGATAA  
GAAGGTTGAGAAGGTAAGCCATTCTGGGGCTAGGATATATTTTGTAACATCTTCGAGGT  
GGGCTCCCTCACAAGCATGTTTCT

>2190

TCTGGCTTTTCCCTTGAGGATCCCCAGACCCACTCCAACCGCATCTATCGCATGATCAA  
GCTAGGTCTAGGTAAGTAGCTTTGGTACTTGGTGTGGCAAGGAGTTTGTGCAACTCGT  
CTCCTCTATGGATTTGACTTAAT

>2191

GGCATCGGCTTCCACCTCCAGGCGCTCCCCGACGGCCGCATCGGCGGCGCGCACGCG  
GACACCCGCGACAGTGAGTGGCGCGGCCAGGCGCGAAGGGGCGGGGGCGGGGGGCA  
ACGGCCGCGGGCCAACCCGCTCAGTC

>2192

GGTGAGCATCTTCGGCGTGGCCAGCCGTTCTTCGTGGCCATGAGCAGCAAGGGCAA  
GCTCTATGGCTCGGTGAGTACCGCAGGGGTCTGGCTAGGCACCTAGTTGGGAACAGCG  
GACATGGCTAGCAGGCTCGTGGCTT

>2193

ATCATCACCACAGCCCTGGTGTGCTTGCTGCTAGCTGGGATGTGGCCGGAAGATGTGG  
ACAGCAAGAGCAGTGAGTGTGGCAGGCATCATTTTGCTTCTCTCTGGGGAGGGCAGA  
AACGTGGTCAGCCACTCTGGGGTTG

>2194

AAGAGATTCCCCTGAGGGCAATCCTGTGTTACAGAAATACCAGCTCCATCTGCTCCAAT  
GAGGGCTTAATGTAAGTGATCACCTGCTCAATCTCTCCCTAGAGAACAGAACCCCGCC  
AGCCTGGAATTACAAGAGTAGAC

>2195

GGGCTCTGCGTCAACGCTAGTGCCGTCAGCCGCCTGCGCGCCTACCTGCTGCCAGCGC  
CGCCAGCTCCAGGTGAGCCGCCCCGCCAGGTGCGCTGCGTGCAGCACCGCCACTGGCG  
CCGAAGGGCCTGGGGGTTGCTGGGT

>2196

AGTTGACTACGAGTCTCAGAGCACAGATACCCAGAACTTCTCCTCCGAGTCCAAGCGG  
GAGACAGAATATGTGAGAGCTTTTCCTCTTGTTAAAGGAGGAGGGCAAGACCTGCCAA  
GCCTGGGTACTCAGAGCCTCTTGA

>2197

CAATGTGCTGAGTCCCAGGGGTGTACACATTCCCAACTGTGACAAGAAGGGATTTTAT  
AAGAAAAAGCAGGTGAGTGAGGTCCTCAGTGTGTTTTCTTCCTCTTCTGTTGACACAG  
AGGAGAAACCCATGTCACCAGCGC

>2198

GCGCATGAGACCCTGGCTAGAGATGCAGATTAATTCCAACCAAATCCCGGGGCTCATCT  
GGATTAATAAAGTGAGTGTA ACTCTTTGGGTTTTCTG CCACTGTTTTAACCCATGTACT  
TCTGGAGGGACCAAAGCTTCA

>2199

CATGCTGCCAAGCATGGCTGGGACATCAACAAGGATGCCTGTTTGTTCCGGAGCTGGG



CCATTCACACAGGTGTGTGCCTGGGACTCAGGCCTAGGAAGCCCAGGGTAGAGACAA  
GAGGAGGCACTCACGTTAACACAGA

>2200

AGGAACAAGGGCAGCTCAGCTGTGCGAGTGTACCGGATGCTTCCACCTCTCACCAAG  
AACCAGAGAAAAGGTATCCAAGGACTCTGGGTCTTGGGAAGCCCTCAGGGAGGGAG  
GGTAGAAGGAGGTCAGCTGGGGCTGG

>2201

GATGACCACAGCAGCTACACAGTTCCAGGCTACATGCAGGACTTGGAGGTGGAGCAG  
GCCCTGACTCCAGGTGAGCTGGTCCAGGTCTGGCAGGAGACCCACAGGTCAGTGGG  
ATGACTCTTTCTCTTGGAGGCATGGT

>2202

GAAGTTGTGCCGGACAGCACCAGTGATCTGTACAACCTCCAGGTGTCACCCATGCCCT  
CCACCTCTGAAGGTTGGTGCTCCTGGGGCCTGGCCTGCTGCTTGACTGTCTGGGTCTG  
TGAAGGGCTTCTGAGAGAGAAAA

>2203

GGAGTCCAGCCCACCTCTGTCTATGGAGACTTTAGCTGTAAGGAGGAGCCAGAAATTG  
ACAGCCCAGGGGGTAAGAAGGCCCTGGATCCTTATGGCTTCTTAGATGAGGGAGAACC  
ACGTAGGGATGGAGAAAGCTTGGG

>2204

GAGTCCATGAAGAAGATGGCTCCTGCCATGGAATCCCCTACTCTACTGTGTGTAGCCTT  
ACTGTTCTTCGGTAAGTAGAGATTCAATTACCCCTCCCAGGGAGGCCCAAATGAATTTG  
GGGAGCAGCTGGGGTAGGAACC

>2205

AGTGGAGAATACAAATGTCAGCACCAACAAGTTAATGAGAGTGAACCTGTGTACCTGG  
AAGTCTTCAGTGGTAAGTTCCAGGGATATGGAAATACAGATCTCTCATGTGAGGGATGG  
CTCATCTGAAGATGGGAAAAAAC

>2206

TACTACTGTACGGGCAAAGTGTGGCAGCTGGACTATGAGTCTGAGCCCCTCAACATTA  
CTGTAATAAAAGGTGAGTTGGTAAAGGAAAGGAAAAGCATCCATAGCAGGGGAAGGA  
AGAGAGAACTTCTGAGCCTGAGCAG

>2207

CTGCACGCCCTCACCCGCGGCCAAGGCGCCTGCGTGCAGGAGTCTGACGCCTCCGCT  
CCCCATGCTGCAGGTACCACAGTCCCGCCCCTGCTCCAGCACCTCCTGCCGCCCGCCC  
CCGCCCGGCACCTCCCGCCCCCACT

>2208

CCTTTGGGACGCCATCAGTACCTATGATGGCTCGAAGGCTCTCCATGTCACCAACATCA  
AAAAATGGAAGGTGAGGCCACGAGGTGGGTGGTGGGAACTCTCCTGTCAGAGGATG  
TAGCTTGAGTCGGCTGTGACAAGC

>2209

ATCAGGAGAAGAAATTTCCAAATTTTACCTGCCAACTGCAACAAGAATGGATTTTATC  
ACAGCAGACAGGTAGGTGGCCTTGCCAGTGTGCGTCGTCAGGGTGAAAGGGACTACT  
GCCCTACATTCCTGCCAAGCCACG

>2210

CTGGTTCCCTGCCCACAGACCTTCCAGGAGAATGACCTGAGCACCTTCTTTCCCTTCAT

CTTTGAAGAAGGTAGTTAGCCAAGAGCAGGCAGTAGATCTCCACTTGTGTCCTCTTGG  
AAGTCATCAAGCCCCAGCCAACT

>2211

AGCTTGGTGATGTCTGGTCCATATGAACTGAAAGCTCTCCACCTCCAGGGACAGGATAT  
GGAGCAACAAGGTAAATGGAAACATCCTGGTTTCCCTGCCTGGCCTCCTGGCAGCTTG  
CTAATTCTCCATGTTTTAAACAA

>2212

GGGCCTCAAGGAAAAGAATCTGTACCTGTCTGCGTGTTGAAAGATGATAAGCCCACT  
CTACAGCTGGAGGTAAGTGAATGCTATGGAATGAAGCCCTTCTCAGCCTCCTGCTACCA  
CTTATTCCCAGACAACCCACCTTC

>2213

AAGCAAAAACCTTTCACCTTAAGACCCAGGGACTTAATCAGCAATATCAACGTAATAGTTC  
TGGAATAAAGGTAAGGCATTACTTTATTTGCTCTCCTGGAAATAAAAAAAAAAAAAAGT  
CAGGGGGAAAAGTACCACATTTT

>2214

TACAAAGAAAACACAGCTACAACCTGGAGCATTTACTGCTGGATTTACAGATGATTTTGA  
ATGGAATTAATGTAAGTATATTTCTTTCTTACTAAAATTATTACATTTAGTAATCTAGCTG  
GAGATCATTTCTTAATAAC

>2215

AAGCAAAAACCTTTCACCTTAAGACCCAGGGACTTAATCAGCAATATCAACGTAATAGTTC  
TGGAATAAAGGTAAGGCATTACTTTATTTGCTCTCCTGGAAATAAAAAAAAAAAAAAGT  
AGGGGGAAAAGTACCACATTTTA

>2216

CTGCCCCTGCTGGGAGTGGGGCTGAACACGACAATTCTGACGCCCAATGGGAATGAA  
GACACCACAGCTGGTGGGAAATCTGGGACTGGAGGGGGCTGGTGAGAAGGGTGGCT  
GTGGGAAGGGGCCGTACAGAGATCTGG

>2217

TCGAGTACATGAATTGCACTTGGAACAGCAGCTCTGAGCCCCAGCCTACCAACCTCAC  
TCTGCATTATTGGTATGAGAAGGGACGAGGGGGAGGGGATGAAGAAGAGGTGGGTTG  
GATCAGAGACCAAGAGAGAGGGTAG

>2218

GTTGTTTCAGCTCCAGGACCCACGGGAACCCAGGAGACAGGCCACACAGATGCTAAAA  
CTGCAGAACTCTGGGTAATTTGGAAAGAAAGGGTCAAGAGACCAGGGATACTGTGGGA  
CATTGGAGTCTACAGAGTAGTGTTCT

>2219

CAACAGATTCTTGAACCACTGTTTGGAGCACTTGGTGCAGTACCGGACTGACTGGGAC  
CACAGCTGGACTGTGAGTGACTAGGGACGTGAATGTAGCAGCTAAGGCCAAGAAAGT  
AGGGCTAAAGGATTCAACCAGACAG

>2220

CTCTGTGGAAGTGCTCAGCATTGGAGTGAATGGAGCCACCCAATCCACTGGGGGAGC  
AATACTTCAAAAGGTAAAATGGGCCCACATGACCCAATCCATGAGCCCAACACCCCAG  
CCTTTCTAACACCACTGTCTTTTGC

>2221

CCGTGGTTATCTCTGTTGGCTCCATGGGATTGATTATCAGCCTTCTCTGTGTGTATTTCTG

GCTGGAACGGTGAGATTTGGAGAAGCCCAGAAAAATGAGGGGAACGGTAGCTGACAA  
TAGCAGAGGAGGGTTTTGCAGG

>2222

GACGATGCCCCGAATTCCCACCCTGAAGAACCTAGAGGATCTTGTTACTGAATACCAC  
GGGAACTTTTCGGTGAGAACGCTGTCATAAGCATGCTGCAGTCTATCAACTGCCAACT  
GCCTGCCAGCAAGACAGACAGAGT

>2223

CCACGGACACAAGTGCGATATCACCTTACAGGAGATCATCAAACTTTGAACAGCCTC  
ACAGAGCAGAAGGTGAGTACCTATCTGGCACCATCTCTCCAGATGTTCTGGTGATGCTC  
TCAGTATTTCTAGGCATGAAAAC

>2224

CCACAGGCACAAGCAGCTGATCCGATTCCTGAAACGGCTCGACAGGAACCTCTGGGG  
CCTGGCGGGCTTGGTAAGCTGCACTGTATTCCTGGCAAGCCGGCCGCGTGGCTCCTGG  
TGGACAGCAGCCTCACTTCTAAACA

>2225

GCAAGGGGGTACTGTGGAAAGACTATTCAAAAACCTTGTCTTAATAAAGAAATACATT  
GACGGCCAAAAAGTAAGTTACACACATTCAATGGAAGCTATATTTGTCTGGCTGTGCC  
TATTTCTATGGAATTGACAGTTT

>2226

CACAAGTGCATTGGTGAAAGAGACCTTGGCACTGCTTTCTACTCATCGAACTCTGCTG  
ATAGCCAATGAGGTAATTTTCTTTATGATTCCTACAGTCTGTAAAGTGCATAGGTAATCA  
TTTGTGATGGTTCCTTTACTAT

>2227

GCAAGGGGGTACTGTGGAAAGACTATTCAAAAACCTTGTCTTAATAAAGAAATACATT  
GACGGCCAAAAAGTAAGTTACACACATTCAATGGAAGCTATATTTGTCTGGCTGTGCCT  
ATTTCTATGGAATTGACAGTTTC

>2228

CGTGGCAGGCCAGGGGTGTCCAACCTTGGCGGGGATCCTGGACATCAACTTCCTCATC  
AACAAGATGCAGGTAGGCTGCAGGGGGAGCCCATGGGAAAGACAGCTACTGACAAAG  
TGAAATATGTATGAGGATGAAAAAA

>2229

AACAAGATACCCACTGATTTTCAGTCGGGTGAAAAAATCAGTTGAAGTACTAAAGAAC  
AACAAGTGTCCAGTAAGTTTGTTCATATGTGATATGTTCTGTTGGTGATTCTATGT  
GAATGGTGATGCCAACCCTGTT

>2230

GGTGACAAATCACCTCCAGGTTGGGGATGCCTCAGACTTGTGATGGGACTGGGCAGAT  
GCATCTGGGAAGGTGAGTCTGTGCTTTGGGCTTCCCAACCTCTCAAGTCAGCATGAAA  
TTCAGAAGGCAGAGAGGGACATGT

>2231

GCATCCCAGAGCCCCGCTCCTGGGTACCCACAACATGAACACCGTCCAGAAGCAAGG  
GCAGCCTCTGCAGGTGGGGCGGGGGTTGGAAAACATTTATCAAACGGTTGAGTTGGGT  
GCAGGGGATGCAACATGATCAAACA

>2232

CAGAGAACTTGCCACGGTGTTTCATGCTGTGGCTGGTGGTTCCAGGCTGCACGCTCCA

TTCTAGGAAAGGGTGAGGCTTCCTGATCATCAGTCTTAACAGGGGACTGTCCTATGGGT  
ACCTGTATACGCTGCCGGGAGTG

>2233

TGGCTCCTGGCCTGCATCTGCATCTGCACCTGTGTCTGCTTGGGAGTCTCTGTCACAGG  
GGAAGGACAAGGTGAGGGCTGGGCACTAATGTCTGTATGAGGTGGGTGGAGAACTAG  
GGCATGTTTGGGGGACTGGGTTGT

>2234

TCAGGATCGATTGCCACTGGTCTGCCCCAGAGCTGGGACAGGGCTCCAGCCCCCTGGCT  
CCTCTTCACCAGGTGAGCATGGAGGGCCATGCCACCTGGACAGGGATGAGGGTGAG  
TTCCCCAGGATTGAAGCAGCTATGC

>2235

TTCCACCACTGCATGTCTGGGAGGGAGCAGGTCAGCCTGGTGGACCCGGAGTACCTGC  
CCCGGAGACACGGTGAGCAGCAGCTATAGGTCTGGGGCGGGGCCGCTTGGCAAGAAC  
ATCCTGGCTGCTTGGGGGTTTGGAG

>2236

TGCCTTGGAGCCAATGACCACACTTCTCAGCTATGAGCTGGCCTTCAAGAAGCAGGAA  
GAGGCCTGGGAGGTAACACTTTGGCTGGCTTTCCTGGGGGCCTCTCTCCTGGGAACA  
GCAGTCCAGGGTAGACTCCCCACT

>2237

GAGGAGCGTTATACAGGCCAGTGGAGTGAGTGGAGCCAGCCTGTGTGCTTCCAGGCT  
CCCCAGAGACAAGGTGGGCACTGCTGTGGCTGCTGCACTTCCAGCGGAGTCTGGGCT  
GGGCGTCTTCTCCCCTGTTACCTCA

>2238

CCTTGTTGCTGTGTCCATCTTTCTCCTGCTGACTGGCCCGACCTACCTCCTGTTCAAG  
CTGTCGCCCAGGTAGGTGGCTGATGTGTGCGTGTGTGTACATGTGTGAGCGGGCAAGA  
GTGTGCATGTTAGTGTATGTGTG

>2239

CTACCAGAACGTGCCCTCTCCAGCGATGTTCTTCCAGCCCCCTCTACAGTGTACACAATG  
GGA ACTTCCAGGTGTGTGCAGAGACCACAGAAGGACATGGGGGGCAGGGGTTGCCCA  
GAGCTCTGGCCTGCCCAAGATGTT

>2240

CGTCCTACGTGCCAGACGACGGA CTACAGCACAGCAGCTCTTCAACTGCGGAGACG  
GCCTCACCTACAAGTGCGGGCCTATGGGGCTCACCTGGGCGAAGAGAGGGGGCGGCAC  
CTGGGGAAAAGGCCAGATGGGGGCTT

>2241

TCTTAAGACCCCACTGGTTTCCTCTCCCATGGACACAGTCACAGAGGCTGGGATGGCC  
ATAGCAATGGCGGTGAGCCCCATGGGGTGTGGGGGAAGGAGCAAGGACTCCATCGCC  
TTTCCCCAAAGGCATTCAGTCCTGC

>2242

AGGCGGTATTGGCTTCATCCACCACA ACTGTACACCTGAATTCCAGGCCAATGAAGTTC  
GGAAAGTGAAGGTCAGAAGGGCAACGATCATTAGCAAGCGCTCCTGGGAATTGCACT  
GAGGTGGGGTGGGGTGGGAGTAGG

>2243

GGTGGGCATCATCTCCTCCAGGGACATTGATTTTCTCAAAGAGGAGGAACATGACTGT

TTCTTGGAAGAGGTGGGTGCCACTGGCAGAGTAGATCCAAGCTCTAGCAGCCCAGGTT  
GAAGACAAGGGGCTTCTGTTGTCT

>2244

GACTTGGTGGTAGCCCCTGCAGGCATCACACTGAAGGAGGCCAAATGAAATTCTGCAGC  
GCAGCAAGAAGGGTAAGTCCTAGAGCTGGGAAAGGGCCTGGAATAATGCCTAGGGT  
CCTGATTCATGTCCTGCCCTGACCA

>2245

GGCACTCATGAGGATGACAAGTATAGGCTGGACTTGCTCGCCCAGGCTGGTGTGGATG  
TAGTGGTTTTGGGTGAGCCTGCTACACAGGTGGGTGGGGCAATAGGGGCAGCTGCCA  
CATGACAGTCTGAGACTTACTTCT

>2246

ATCTTCCAGATCAATATGATCAAGTACATCAAAGACAAATACCCTAATCTCCAAGTCATT  
GGAGGCAATGGTAAGGCAAGATTGTGCCCTGAAGGATGTGTGGTGGGAGTGGGTAAG  
CTGGGCTCCACCTTAACCTTCA

>2247

CTCATTGATGCAGGTGTGGATGCCCTGCGGGTGGGCATGGGAAGTGGCTCCATCTGCA  
TTACGCAGGAAGGTAAGAATATACTTTGATAGGGCCCACAGAGACCCCAGTTTCAGGC  
CCCACATACCTTGGAACCAAGCAC

>2248

AGAAATATCGCGGTATGGGTCTCTCGATGCCATGGACAAGCACCTCAGCAGCCAGAA  
CAGATATTTACAGGTGGGACAGGCAAGCCAGTTACCCACCCTAATCCTGCACTGACAG  
TCTCATCTCTGCTGTGACCTTGCC

>2249

TCCCTTACCTGATTGCTGGCATCCAACACTCATGCCAGGACATTGGTGCCAAGAGCTTG  
ACCCAAGTCCGGTGAGCTTGGGGAGCTGGGACATGGGTAGAGGGGCTGGTCCAGGGC  
CAGCTACCCACATTTGACCTCTGC

>2250

CTGGGGAGCTTAAGTTTGAGAAGAGAACGTCCTCAGCCCAGGTGGAAGGTGGCGTCC  
ATAGCCTCCATTTCGTAAGTCACCCTGTCCTTGGTGGGGCCTCTGCCATACCTCATGCCTC  
CTTCTCCTGCCCTCACCTCACA

>2251

CGAGTATAACAAGGCCACCAAAGATGACTACTACAGACGTCCGCTGCGGGTACTAAGA  
GCCAGGCAACAGGTAGGTGCTCCCTCCACCCAGGGGTCTGGGTCCCAGCCTGGTTT  
GTTCCCAACCCCAAGAGCATTC

>2252

AACCATATGTACCAAGTCCCAGCCCAACTTGGACACCTGTGCCTTCCATGAACAGCCA  
GAACTGCAGAAGGTACGTTCTTGATGCAGGTCCCGGGCCAGTCATGCACTGCAGAGG  
GGTGCATATGTGTCAGCCTCTGCCC

>2253

CCCACACCTGAAGGCAGCCCATATCCCTGAGAATGCCAAGGACCGCATTCCTGGAATT  
GTGCCCATGCAGGTGAGACCAAGAGAGACCTGGCTGAACCCAGTCCCGGGAGTGAG  
TTGACCCATTGTCCGCACATGCAGG

>2254

TCTCCAGGCTGCTGGTGGAGCACATCTGGAAGAAGATCATGCACACGGATGCCATGAT

CATCGACATGAGGTCAGTGGCCAGGGGTCAGTGCTTCCTAGCCAGGACGCAGGGCTG  
CCAGGGGACAGTCAAAGCTATGGGC

>2255

CTGCTGGACAAGATCTACAGCCGGCCTGATGACTCTGTGTCAGTGAAGTCTGGACACACG  
CCCAGGTTGTAGGTACGTGGAGAAGCTTTCTCCTTTCTGCTGTCATTCTAGAAGCTTCT  
GGGAAACCAGGGAAAGACAGCTT

>2256

GCACTTTCCAGTGTGGGGGCATCCTGGTGCACCGCCAGTGGGTGCTCACAGCTGCTCA  
TTGCATCAGCGAGTGAGTAGGGGCCTGGGGTCTGGGAGGAGGGCATCTATGCTGCCAC  
AGGATTGACAGGCCAGTGGCATT

>2257

CCCACCCAGGAACCCGAAGTGGGGAGCACCTGTTTGGCTTCCGGCTGGGGCAGCATC  
GAACCAGAGAATTGTATGTGGGGGCAGACTGTGTAGCCCAAGGCGGGGATGGGGACT  
CCTGCGTCCAAGGGAGAAAGGGCCAG

>2258

CCACGTCCAGAAGGTGACAGACTTCATGCTGTGTGTGTCGGACACCTGGAAGGTGGCAA  
AGACACCTGTGTGGTGAGGCAGCCCTGCCCCAGGGTCTGGAAGGGCTGAGGGAGGG  
GACTCAGCCTCTGAACTGGCTTCTGA

>2259

GATGGGACACTGTGGGGGTGTCCTGGTGCACCCCCAGTGGGTGCTCACAGCTGCCCA  
TTGCCTAAAGAAGTAAGTAGGACCCTGGGATCTGGGGAGGGAATGGCTGTGTCCCACA  
GGAATAACAGCGGGATGCTTCCCC

>2260

CCCACCCAGGAGCCAGCACTGGGGACCACCTGCTACGCCTCAGGCTGGGGCAGCATC  
GAACCAGAGGAGTGACGCCTGGGCCAGATGGTGTAGCTGGGAGCCCAGATGCCTGG  
GTCTGAGGGAAGTGGGGCCAAAGAAC

>2261

TTACTCTGAGAAGGTGACAGAGTTCATGTTGTGTGCTGGGCTCTGGACAGGTGGTAAA  
GACACTTGTGGGGTGAGTCATCCCTACTCCCAACATCTGGAGGGGAAAGGTGAGTGA  
AGACCTAATTCTGGGCTGCAATCT

>2262

ATTGTGGATTGGTTCAGTGAGCTCAAGAAGGACGTCTTGATGGTGCTGGTGAATTACAT  
TTACTTCAAAGGTGAGAGTCAGATCATTGGTATATGCTAAATCCACACCACCGCCTCCA  
ACCCACTAATTTGTTGACTGGT

>2263

AAATGAGGGAGATTGAAGAGGTTCTGACTCCAGAGATGCTAATGAGGTGGAACAACCTT  
GTTGCGGAAGAGGTAATCAGTGTGCTATGGGGGCTGAATCTACAGTACTATCCATCAAA  
TGTAACCTTTCTAATGAAAGACAG

>2264

CACGGATCTGTTCTCCAAGTGGGCTGACTTATCCGGCATCACCAAACAGCAAAAACCTG  
GAGGCATCCAAAGTAAGTCGTCAACAGTCAGCAATCCCTAGAGAACTCGGTAGGGCA  
GTGCCCATGGGAGCTGCCAGGCGAT

>2265

GAGGCAGCGGCCTGCTGAGATCAAAGACTACAGTCCCTACTTCAAGACCATTGAGGAC

CTGAGGAACAAGGTGGGTGAATGGGCAGCAGAAGGCACCATTCAGCTAGCTCCTTC  
TGGGAACAATTCATGCCCCAGGCCG

>2266

CAGTGGACAATGCCAATGTCCTTCTGCAGATTGACAATGCCCGTCTGGCCGCGGATGA  
CTTCCGCACCAAGTGAGTTTGAAATGGTGGGCCAGAACATCCAGTGTCCCCAGAGTAG  
GGCATTTTTGGAGCAGTGTTTCCC

>2267

AGCTGACCTGGAGATGCAGATTGAGAGCCTGAAGGAGGAGCTGGCCTACCTGAAGAA  
GAACCACGAGGAGGTGAGAACTATATGGAAAAGTCAGCTTAAAAGAAATGCAGGGAG  
GCTGGGTACAGTGGTGCGTGCCCATA

>2268

GATGCGTGACCAGTATGAGAAGATGGCAGAGAAGAACCGCAAGGATGCCGAGGAATG  
GTTCTTCACCAAGGTGGGTGTCATTTGAGGTGGAAGGAACCCAGACCACCTGCCTTCT  
GGGGCCTTCTGGTGTGAATGGCATT

>2269

GAGCGAGATCTCGGAGCTCCGGCGCACCATGCAGAACCTGGAGATTGAGCTGCAGTC  
CCAGCTCAGCATGGTAGGAATAGTGCCAGGAAGGGTGGTGCACCCAGGACTGGCAGG  
GAGAGAACGGCCACACTCACTAATCG

>2270

TGGACGTGAAGACGCGGCTGGAGCAGGAGATCGCCACCTACCGCCGCCTGCTGGAGG  
GCGAGGACGCCCAGTGAGTCTTGGCCCTCCCCTTAGTCCGCCCCCCCCATGGCACTCT  
CACGGCCCCACCATGTATCTAATGA

>2271

AAAGGTGAAGTCTCGAGAAAGGGAGCAAATCAAGTCACTCAACAACCAATTTGCCTC  
CTTCATTGACAAGGTGAGTTTCTCTCTCATTGCACTGGTAGCTGCGCCGGTCCACTCGG  
GATCGGTGCAGTCAAAACACACGC

>2272

AGAGTGATCAATCTCGGTTGGATTTCGGAACCTGAAGAACATGCAGGACATGGTGGAGGA  
TTACCGGAACAAGTAAGGGACCCTGTCTGGGCAGTTCTTAACTTTTGCTGTAAAAAAG  
AGTTCCAAGAAAAGTAATAAGCTA

>2273

GGTGGACCTTCAGGCCAAACTTGACAACCTTGCAAGCAGGAAATTGATTCCTTACAGCA  
CTCTACCAAGCAGTAAGTCTTCCAGTTTCAACCAAGTTTATCTAAATGGAGAGTTTTTA  
AGCCGGAACCCACAACGATCTAG

>2274

GGTCAAGGCCCAGAACGAGGATATAGCCCAGAAGAGCAAAGCTGAGGCCGAGTCCTT  
GTACCAGAGCAAGGTGAGTGGCTGAAAGCCTAGCCAGTTTCCCTGAAATGGCTTGTCT  
TGCTATCCTGTGTTATCTCATGTAT

>2275

GATAGAAATTTCTGAGCTGAATCGTGTGATCCAGAGACTTAGATCTGAAATCGACAATG  
TCAAGAAGCAGGTATGTGCTTTCTCCTTCTACCACTCAGCTGTATGGAATGGGGGTAAC  
CCTACAGGTAAAGGGCGAGTGC

>2276

TGAACACCAAGCTGGCCCTGGATCTGGAGATTGCCACCTACAGGACCCTCCTGGAGGG

AGAAGAAAGCAGGTGAGGAAGGGACGCTGGGAGTACTCGCCCCCTTCCCCTGGTCCT  
TCCTTCCTTGCCACCGAATGATGAT

>2277

GTAATCTTCCGAGGTGCAAATTCTCAGAAAAATGCATTCCGGAAAAATCCCAGTGATCC  
AAAGCTTGACGTAAGTATTGATTTATGTTTATATTATATATTACATGAAGGTTTTATTT  
TTCTTTTTGTCTCGACATC

>2278

TGGGGCTTTGTTTCGCCACCCCAATTACTTGGGTGATCTCATCATGGCCTTGGCGTGGTC  
CCTCCCATGTGGTAAGCATTTCAGAAGAGTGCTAGTTTGACCCTTTTAGCCGCCAGAAA  
GATGTGTGTGTGTGTCCTTTGT

>2279

TACTCGTTCCCAGAAAGGAAGTTCTGGAGACCAGGAAATGACAGCTACACTTCTCACA  
GCAGGGTTCCAGGTGAGTTGTGCTCCTTCTCACTGAAACGCCATAGCTGTGCTTGTC  
GTGTTTGTGGCATCTGCCCTATAT

>2280

CTTGATCCATCACAGAAGGATCTGTGTAGAGATAACAGGCCAGAAAATTCAGAAACA  
TGTTCTCCCTGGGTAAGGAGAGGTGTGGTTATTATTGTCATTTTAGATTTTTTGTGTT  
TGTTGTTTATGTGTATAGTAGC

>2281

CAGGTCTCCACTGCTGCCCTTGCTGTCCTCCTCTGCACCATGGCTCTCTGCAACCAGTT  
CTCTGCATCACGTGAGTCTGAGTTTCGTTGTGGGTATCACCACTCTCTGGCCATGGTTA  
GACCACATCAATCTTTTCTTGT

>2282

GGCAGATTCCACAGAATTCATAGCTGACTACTTTGAGACGAGCAGCCAGTGCTCCAA  
GCCCCGTGTCATGTAAGTGCCAGTCTTCCTGCTCACCTCTATGGAGGTAGGGAGGGTC  
AGGGTTGGGGCAGAGACAGGCCAG

>2283

GCGTGTCCATCTGTGAGAAGGAGCCAGAGCCCAAGGGAGATGATGGAGCCTGAGGAG  
TACAGAGAGAGAGGTGAGCAACGGGCATCCCTGGCCCTCTTCCCTGCTGCTACTCCTG  
CAGGAACGGCTGCTGGTGGGTGGCC

>2284

GAGTGCTCCTGAGGACCCCGACAGCTGGGACAGCATCTTTGGGGACATTGAACGAATC  
ATCATGCCTGGGGTGAGACACAGTGACCACAAGGGCAGTTCTGGATTCAGGGCACA  
GAAGGGTGGGTGGTGGCCTGGAGAA

>2285

CCTCACCTCTTGGCCCTCCCTGCTAGGAGACATGCTGGCTGATGCCATCAACTGCTTGG  
GATTCACCTGGGTGAGTAGCAACGGCTGTAACCTACTCGCAATGGGGAACGTAGCAGGG  
AGTGGTATCCTAGGGCAGACATA

>2286

AAAAATGCTGGGACTTCCAGAGCACTTCTTGCACCACCACCCCAGCAGCCAGGGCGG  
AGGCGTCCTGCAGGTACCTCCCTTGGCAAAGCTTCACCTAGCTTGGGGGCTAAGTAGC  
GAAAGACAAGCCAAACCCTAACCTG

>2287

GAAAACGTCTGAGCCCGATGCTGATGAGTCCTGCCTAAATGCCCGACTCGTGGCCTAT



GCCTCTGACCAGGTGAGTTGCCCCGACGCAGGACAGCCCTTCGGGTTGGTGCTTGGCTT  
CTGGAATCTTGGTCCTTGAGCAAT

>2288

CTCACTCCGAGGGGAAGCTCTTCAGAAGGCCATCGAGGAAGACAAGCAGCGGGGCTT  
GGTGCCCGTCTTTGTAAGTCAGGATATATGCCTAAGCTTAGAATGATAGAACTTGGATG  
TGAGGAAGGAATTTTGGCAGAATT

>2289

AGTATGCCGACTCCTTCACCTTTAATCCTTCCAAGTGGATGATGGTGCATTTTGACTGTA  
CTGGGTTCTGGTGAGTGTAGCAGCCCAGCTCCGAGCACGCAGGAACGCCTTGCCTCCT  
CTGGAGAGACCTCAGCCACTAA

>2290

GCAGCAGACCTTCAGTGTGAATCCCATCTACCTCAGGCATGCCAACTCAGGCGTGGCC  
ACCGACTTCATGGTGAGTGGCCAGGGACGGGCAGCCTGGTGGGCTCGGGTGGCCAGT  
GGGAACTGTAGGCGTCTGACCCCCC

>2291

TCGCTCTGTAAACTCTGGTTCGTGATTCGGTCCTTCGGGGTGAAGAATCTTCAAGCAC  
ATGTCAGACATGTATGTAGCATGCTGCTGTGGGGGCTGAGCCTGTGTTCTCTGTTTTC  
TCATGGCGAGGAAGGCTGGTTT

>2292

GGTCAGAAACGACCCTTCCTTTGAAATTCCTGCCAAGAGGCACCTTGGCCTGGTGGTT  
TTTCGTCTAAAGGTAATACCATCTTCCAAGCCCCCTCTGTGAATGATGTCTTGTGGTGCTC  
CAGAGCCTCTCGGAAACACAAA

>2293

GTAAACATGACTTCCAAGCTGGCCGTGGCTCTCTTGGCAGCCTTCCTGATTTCTGCAGC  
TCTGTGTGAAGGTAAGCACATCTTTCTGACCTACAGCGTTTTCTATGTCTAAATGTGAT  
CCTTAGATAGCAAAGCTATTC

>2294

TCCACCCCAAATTTATCAAAGAACTGAGAGTGATTGAGAGTGGACCACACTGCGCCAA  
CACAGAAATTATGTAAGTACTTTAAAAAAGATTAGATATTTTGTTTTAGCAAACCTTAAAA  
TTAAGGAAGGTGGAAATATTTA

>2295

ATGGAAGAGAGCTCTGTCTGGACCCCAAGGAAAACCTGGGTGCAGAGGGTTGTGGAGA  
AGTTTTTTGAAGAGGTAAGTTATATATTTTTTAATTTAAATTTTTCATTTATCTGAGACAT  
ATAATCCAAAGTCAGCCTATAA

>2296

AACCACACCCTGGCCCAGACTGCCAGCCCTGACGGGACAGAGCCAGGGCACTCACCA  
GGCTGCAAGAACAGTGCTGGGGTAAGAGGGGAGCGGGGGATCCCGGGCCTGGGACC  
CAGCCTGCATTCTTTGTTTCATTCCTT

>2297

AACTCTCCACCCTGGGAACTGCCCCGCCCACTTTGGCCCTGCACTACCACCCTCACCC  
CTTCCTCAACAGGTAGTGGGGATCTGGGGTGGGGGGCAGTGGGGATTGGGGGCCAGG  
GTCCTTGCCCAACAAGGACTTAGTGA

>2298

CCTTTTAGCATCTTCCCTAGCAGCCGGTTGAAGCGGAGACCAAGCCACTGTGAGCTGG

ACCTGGCTGAGGGTGAGTGTGGGTTTGTGTGCCTTGTGGGTTTGTATGCCTGTATGTGC  
ACTTGTGGGTGCACAGAAGGCCT

>2299

CTTGTTGCTGGCGGTGCCTATCACTGTCCTGGCTGTGCTGGCCTTAGTGCCCCAGGATC  
AGGGAGGACTGGTGAGTGGCTGCAACAGGCCCTGGTGGAGAGTTGTATCTTGCGGAT  
GCTTGGCTCCCTCTGGTTGTGCCT

>2300

TTTCAGAAAGCTGCCAGAGGAGGAGCCAGAAACAGATCTCAGCCCCGGGCTCCCAGCT  
GCCCACCTCATAGGTAAGGACCTCCAAGACCTGAATAAGAGTGTAATAATCCGAAGG  
TTCCAGTTCTGCTCGCCCAGAGTCC

>2301

TTCAGGGGACAGGCCAACCCAGAGGACAGGATTCCCTGGAGGCCACAGAGGAGCAC  
CAAGGAGAAGATCTGTAAGTAGGCCTTTGTTAGAGTCTCCAAGGTTCAAGTTCTCAGCT  
GAGGCCTCTCACACACTCCCTCTCTC

>2302

AGATTCTCGCCCTGAGCAACGGCCTGACGTCGGCGGAGGGAAGCAGGCGCAGGCTCC  
GTGAGGAGGCAAGGTAAGATGCCGAGGGAGGACTGAGGCGGGCCTCACCCCAGACA  
GAGGGCCCCCAATAATCCAGCGCTGCC

>2303

ACTTCTCAGGCTCAGTCGCCACCACCTCACCCCGCCACCCCCCGCCGCTTTAACCGCA  
GGGAAGTCTGGCGTAAGAGCTTTGTGTGACCAGGGCAGGGCTGGTTAGAAGTGCTCA  
GGGCCCAGACTCAGCCAGGAATCAA

>2304

CAGGGGCCCCATCTGGTCGACAGATGCAGTGGTTCTAGGATCTGCCAAGCATCCAGGT  
GGAGAGCCTGAGGTAGGATTGAGGGTACCCCTGGGCCAGAATGCAGCAAGGGGGCCC  
CATAGAAATCTGCCCTGCCCCTGCG

>2305

GACGAAACCATGAAGAGCCTGATCCTTCTTGCCATCCTGGCCGCCTTAGCGGTAGTAA  
CTTTGTGTTATGGTGAGAACTTTTCTCCATTTCTCTGTGTTTACTTTTCTGCCTCTGA  
CTTTGGCTTACTTCTATTTTC

>2306

TCATTAACAGGAGAAATGCAAATACCTTCATATCCCCTCAGCAGAGATGGAGAGCTAA  
AGTCCAAGAGAGGTCAGTAACAAAACCTTCATGAGGAGTGGTCATTTTCCCAGTGTAG  
ATCACAGATCTGAATTGGAGTGGG

>2307

GTGGTCATGGCGCCCCGAACCCTCTTCCTGCTGCTCTCGGGGGCCCTGACCCTGACCG  
AGACCTGGGCGGGTGAGTGCGGGGTCAGGAGGGAAACGGCCCCCTGCGCGGAGGAGG  
GAGGGGCCCCGCCTGGCGGGGGCGCAG

>2308

AAGGCCCACGCACAGACTGACAGAATGAACCTGCAGACCCTGCGCGGCTACTACAAC  
CAGAGCGAGGCCAGTGAGTAACTCCGGCCCAGGGAGCAGATCACGACCCCCACCTCC  
ATGCCCCACGGACGGCCCCGGGTACTC

>2309

CTGGAGGGCACGTGCGTGAGTGGCTCCACAGATACCTGGAGAACGGGAAGGAGATG

CTGCAGCGCGCGGGTACCAGGGGCAGTGGGGCGCCTCCCTGATCTCCTGTAGACCTCT  
CAGCCTGGCCTAGCACAAGGAGAGG

>2310

GGAGAGGAGCAGAGATACACGTGCCATGTGCAGCATGAGGGGCTGCCGGAGCCCCTC  
ATGCTGAGATGGAGTAAGGAGGGAGATGGAGGCATCATGTCTGTTAGGGAAAGCAGG  
AGCCTCTCTGAAGACCTTTAACAGGG

>2311

CTGGTTGTCCTTGCAGCTGTAGTCACTGGAGCTGCGGTCGCTGCTGTGCTGTGGAGAA  
AGAAGAGCTCAGGTAAGGAAGGGGTGACAAGTGGGGTCTGAGTTTTCTTGTCCCCT  
GGGGGTTTCAAGCCCCAGGTAGAAG

>2312

GCCGTCATGGCGCCCCGAACCCTCGTCCTGCTACTCTCGGGGGCTCTGGCCCTGACCC  
AGACCTGGGCGGGTGAGTGCGGGGTCGGGAGGGAAACGGCCTCTGTGGGGAGAAGC  
AACGGGCCCGCTGGCGGGGGCGCAGG

>2313

AAGGCCCACTCACAGACTCACCGAGTGGACCTGGGGACCCTGCGCGGCTACTACAAC  
CAGAGCGAGGCCGGTGAGTGACCCCGGCCCGGGGCGCAGGTCACGACCTCTCATCCC  
CCACGGACGGGCCAGGTGCCCCACAG

>2314

CTGGAGGGCACGTGCGTGAGTGGCTCCGCAGATACCTGGAGAACGGGAAGGAGACG  
CTGCAGCGCACGGGTACCAGGGGCCACGGGGCGCCTCCCTGATCGCCTGTAGATCTCC  
CGGGCTGGCCTCCCACAAGGAGGGG

>2315

GGACAGGAGCAGAGATACACCTGCCATGTGCAGCATGAGGGTTTGCCCAAGCCCCCTCA  
CCCTGAGATGGGGTAAGGAGGGAGACGGGGGTGTCATGTCTTTTAGGGAAAGCAGGA  
GCCTCTCTGACCTTTAGCAGGGTCA

>2316

CTGGTTCTCTTTGGAGCTGTGATCACTGGAGCTGTGGTCGCTGCTGTGATGTGGAGGA  
GGAAGAGCTCAGGTGGGGAAGGGGTGAAGGGTGGGTCTGAGATTTCTTGTCTCACTG  
AGGGTTCCAAGACCCAGGTAGAAGT

>2317

GTGCTCATGGCGCCCCGAACCCTCCTCCTGCTGCTCTCAGGGGCCCTGGCCCTGACCC  
AGACCTGGGCGCGTGAGTGACGGGTCTGCAGGGAAATGGTCGGGAGGAGCGAGGGG  
CCCGCCCGCGGGGGCGCAGGACCCA

>2318

AAGGCCCAGGCACAGACTGAACGAGAGAACCTGCGGATCGCGCTCCGCTACTACAAC  
CAGAGCGAGGGCGGTGAGTGACCCCGGCCCGGACGCAGGTCACGACCCCTCCCCAT  
CCCCACGGAGGGCCGGGTGCGCTCG

>2319

CTGGAGGGCGAGTTCGTGGAGTGGCTCCGCAGATACCTGGAGAACGGGAAGGAGACG  
CTGCAGCGCGCGGTACCAGGGGCCACAGGGCGCCTCCCGGATGGCCTGTAGATCTCC  
GGGGCTGGCCTCCCACAAGAAAGGG

>2320

GGAGAGGAGCAGAGATACACCTGCCATGTGCAGCATGAGGGTCTGCCAGAGCCCCCTC

ACCCTGAGATGGGGTAAGGAGGGAGATGGGGGTGTCATGTCCCTTAGGAAAAGCCGG  
AGCCTCTCTGGAGAGCTTTAGCAGGG

>2321

CTGGTTCTACTTGTAGCTGTGGTCACTGGAGCTGTGGTCGCTGCTGTAATGTGGAGGA  
AGAAGAGCTCAGGTAAGGAAGGGGTGAGGAGTGTGGTCTGAGATTTCTTGTCTCACT  
GAGAGTTCCAAGCCCCAGGTAGAAG

>2322

CGGGTCACGGCGCCCCGAACCCTCCTCCTGCTGCTCTGGGGGGCAGTGGCCCTGACC  
GAGACCTGGGCTGGTGAGTGCGGGGTGAGGCAGGGAAATGGCCTCTGTGGGGAGGA  
GCGAGGGGACGCAGGCGGGGGCGCAGG

>2323

AAGGCCAAGGCACAGACTGACCGAGAGGACCTGCGGACCCTGCTCCGCTACTACAAC  
CAGAGCGAGGCCGGTGAGTGACCCCGGCCCGGGCGCAGGTCACGACTCCCCATCCCC  
CACGTACGGCCCGGGTCGCCCCGAGT

>2324

GGAGAAGAGCAGAGATACACATGCCATGTACAGCATGAGGGGCTGCCGAAGCCCCTC  
ACCCTGAGATGGGGTAAGGAGGGGGATGAGGGGTCATATCTTCTCAGGGAAAGCA  
GGAGCCCTTCAGCAGGTCAGGGCCCC

>2325

CGGGTCACGGCGCCCCGAACCCTCCTCCTGCTGCTCTGGGGGGCAGTGGCCCTGACC  
GAGACCTGGGCTGGTGAGTGCGGGGTGCGCAGGGAAATGGCCTCTGTGGGGAGGAGC  
GAGGGGACCGCAGCGGGGCGCAGGAC

>2326

AAGGCCAAGGCACAGACTGACCGAGAGGACCTGCGGACCCTGCTCCGCTACTACAAC  
CAGAGCGAGGCCGGTGAGTGACCCCGGCCCGGGGCGCAGGTCACGACTCCCCATCCC  
CCACGTACGGCCCGGGTCGCCCCGAG

>2327

CTGGAGGGCGAGTGCGTGAGTGGCTCCGCAGATACCTGGAGAACGGAAGGAGAC  
GCTGCAGCGCGCGGGTACCAGGGGCAGTGGGGAGCCTTCCCCATCTCCTATAGGTGCG  
CGGGGATGGCCTCCACGAGAAGAGG

>2328

GGAGAAGAGCAGAGATACACATGCCATGTACAGCATGAGGGGCTGCCGAAGCCCCTC  
ACCCTGAGATGGGGTAAGGAGGGGGATGAGGGGTCATATCTTCTCAGGGAAAGCA  
GGAGCCCTTCAGCAGGTCAGGGCCC

>2329

CTGGCTGTCCTAGCAGTTGTGGTCATCGGAGCTGTGGTCGCTGCTGTGATGTGTAGGA  
GGAAGAGCTCAGGTAGGGAAGGGGTGAGGGGTGGGGTCTGAGTTTTCTTGTCCCACT  
GGGGGTTTCAAGCCCCAGGTAGAAG

>2330

AAGGCCTCCGCGCAGACTTACCGAGAGAACCTGCGGATCGCGCTCCGCTACTACAACC  
AGAGCGAGGCCGGTGAGTGACCCCGGCCCGGGGCGCAGGTCACGACTCCCCATCCCC  
CACGTACGGCCCGGGGTCGCCCCGA

>2331

GCGCCCACCATCGCGTCGCAGCCCCTGTCCCTGCGCCCAGAGGCGTGCCGGCCAGCG

GCGGGGGGCGCAGGTGAGGCGTGCGGGGGCCCGGGGCGGGGGCGGCACGCACCGCG  
GGGAGAGCCCATGCCAGGGACAGCCCT

>2332

TGGGCGCCCCTGGCCGGGACTTGTGGGGTCCTTCTCCTGTCACTGGTTATCACCCTTTA  
CTGCAACCACAGTAAGTCCCGAGGAATCGCGGCGGGAAGGAGTCGGCCCCGCTCCTG  
CCCTTGGCTCTGCTAGCTCCAGGC

>2333

CGGGTCACGGCGCCCCGAACCGTCCTCCTGCTGCTCTGGGGGGCAGTGGCCCTGACC  
GAGACCTGGGCCGGTGAGTGCGGGGTCGGGAGGGAAATGGCCTCTGTGGGGAGGAG  
CGAGGGGACCGCAGGCGGGGGCGCAGG

>2334

AAGACCAACACACAGACTTACCGAGAGAGCCTGCGGAACCTGCGCGGCTACTACAAC  
CAGAGCGAGGCCGGTGAGTGACCCCGGCCCGGGGCGCAGGTCACGACTCCCCATCCC  
CCACGTACGGCCCCGGGGTCGCCCCGA

>2335

CTGGAGGGCCTGTGCGTGAGTGGCTCCGCAGATACCTGGAGAACGGGAAGGAGACG  
CTGCAGCGCGCGGGTACCAGGGGCAGTGGGGAGCCTTCCCCATCTCCTATAGGTCGCC  
GGGGATGGCCTCCACGAGAAGAGG

>2336

GGAGAAGAGCAGAGATACACATGCCATGTACAGCATGAGGGGCTGCCGAAGCCCCCTC  
ACCCTGAGATGGGGTAAGGAGGGGGATGAGGGGTCATATCTTCTCTCAGGGAAAGCA  
GGAGCCCTTCTGGAGCCCTTCAGCAG

>2337

CTGGCTGTCCTAGCAGTTGTGGTCATCGGAGCTGTGGTCGCTACTGTGATGTGTAGGAG  
GAAGAGCTCAGGTAGGGAAGGGGTGAGGGGTGGGGTCTGGGTTTTCTTGTCCCACTG  
GGGGTTTCAAGCCCCAGGTAGAAG

>2338

CTCCCCATCTATCTGCTTGGCCTGACTCAGAAATTCGGGCCCATCTACAGGCTCCACCT  
TGGGCTGCAAGGTGAGAGGCTGATCTCGCTCTGGCCCTCACCATAGGAGGGGGCGGA  
GGTGACGGAGAGGGTCCTCTCTCC

>2339

AAGAGGACCATTGAGGAAGCCATGGTCAAAAAGTGGGCAGACTTTGCTGGCAGACCT  
GAGCCACTTACCTGTAAGGGCTGGGGGCATTTTTTCTTTCTTAAACAAATTTTTTTTAA  
GAGATGGGTTCTTGCTATGCTGC

>2340

AGCCCTGCTGCTGGGCATCCGTGACTCCATGGAGCCAGTGGTGGAGCAGCTGACCCA  
GGAGTTCTGTGAGGTAAGGCTGGGCTCCTGAGGCCACCTCGGGTCAGCCTCGCCTCTC  
ACAGTAGCCCCCGCCCTGCCCGCTG

>2341

CATTGAGGAGGAATTCTCTCTCCTCACCTGCAGCATCATCTGTTACCTCACCTTCGGAG  
ACAAGATCAAGGTGCCTCACAGCCCCCTCAGGCCACCCCCAGCCCCCTCCTGAGCCTC  
TCCTTGTCTGAACTGAAAGTAC

>2342

TATCCAGGAGGTGTTAAAAACCTGGAGCCACTGGTCCATCCAAATTGTGGACGTGATT

CCCTTTCTCAGGGTGAGGACCTGGAGCCTAGACACCCCTGGGTTGTAGGGGAGAGGC  
TGGGGTGGAGGGAGAGGCTCCTTCC

>2343

TCTCCGGAGGCTGAAGCAGGCCATAGAGAAGAGGGATCACATCGTGGAGATGCAGCT  
GAGGCAGCACAAAGGTGGGGACTCTACGTGGACGGCCTCCCCTCGGCCCACAGCCAGT  
GATGCTACCGGCCTCAGCATTGCTAT

>2344

GATCGGTGGCACTGAGACCACAGCAAACACCCTCTCCTGGGCCGTGGTTTTTTTTGCTT  
CACCACCCTGAGGTGCGTCCTGGGGACAAGCAAAAGGCTCCTTCCCAGCAACCTGGC  
CAGGGCGGTGGGCACCCTCACTCAG

>2345

TCGCCGAGGTGCTGCGCCTGCGGCCCCGTTGTGCCCTTAGCCTTGCCCCACCGCACCAC  
ACGGCCCAGCAGGTGACTCCCGAGGGTTGGGGATGAGTGAGGAAAGCCCCGAGCCCA  
GGGAGGTCCTGGCCAGCCTCTAACTC

>2346

ATCATTCGGAACCTCCAAGGCGCCACCTGGATGAGACGGTCTGGGAGAGGCCACATG  
AGTTCTGGCCTGGTATGTGGGGGGCCGGGGGCCTGCCGTGAAAATGTGGTGGAGGCT  
GGTCCCCGCTGCCGCTGAACGCCTC

>2347

CGGGTCATGGCGCCCCGAACCCTCATCCTGCTGCTCTCGGGAGCCCTGGCCCTGACCG  
AGACCTGGGCCTGTGAGTGCGGGGTGGGAGGGAAACGGCCTCTGCGGAGAGGAAC  
GAGGTGCCCCGCCCGGCAGGCGCAGGA

>2348

AAGCGCCAGGCACAGACTGACCGAGTGAGCCTGCGGAACCTGCGCGGCTACTACAAC  
CAGAGCGAGGCCGGTGAGTGACCCCGGCCCGGGGCGCAGGTCACGACCCCTCCTCAT  
CCCCACGGACGGCCCCGGGTCGCCCC

>2349

CTGGAGGGCACGTGCGTGAGTGGCTCCGCAGATACCTGGAGAACGGGAAGGAGAGC  
CTGCAGCGCGCGGGTACCAGGGGCAGTGGGGAGCCTTCCCCATCTCCCGTAGATCTCC  
CGGCATGGCCTCCCACGAGGAGGGG

>2350

GGAGAAGAGCAGAGATACACGTGCCATGTGCAGCACGAGGGGCTGCCGGAGCCCCTC  
ACCCTGAGATGGGGTAAGGAGGGGGATGAGGGGTGATGTGTCTTCTCAGGGAAAGCA  
GAAGTCCTGGAGCCCTTCACGCGGGT

>2351

GCTGTCTGGCTGTCCTAGCTGTCTAGGAGCTGTGGTGGCTGTTGTGATGTGTAGGAG  
GAAGAGCTCAGGTAGGGAAGGGGTGAGGAGTGGGGTCTGGGTTTTCTTGTTCCTG  
GGAGTTTCAAGCCCCAGGTAGAAG

>2352

CGGGTCATGGCGCCCCGAACCCTCATCCTGCTGCTCTCGGGAGCCCTGGCCCTGACCG  
AGACCTGGGCCTGTGAGTGCGGGGTGGGAGGGAAACGGCCTCTGCGGAGAGGAGC  
GAGGGGCCCCGCCCGGCGAGGGCCAGG

>2353

AAGCGCCAGGCACAGACTGACCGAGTGAACCTGCGGAAACTGCGCGGCTACTACAAC

CAGAGCGAGGCCGGTGAGTGACCCCGGCCCGGGCGCAGGTCACGACCCCTCCCCATC  
CCCCACGGACGGCCCCGGGTCGCCCCG

>2354

CTGGAGGGCGAGTGCGTGGAGTGGCTCCGCAGATACCTGGAGAACGGGAAGGAGAA  
GCTGCAGCGCGCGGGTACCAGGGGCAGTGGGGAGCCTTCCCCATCTCCTGTAGATCTC  
CCGGGATGGCCTCCACGAGGAGGGG

>2355

GGAGAAGAGCAGAGATACACGTGCCATGTGCAGCACGAGGGGCTGCCGGAGCCCCTC  
ACCCTGAGATGGGGTAAGGAGGGGGATGAGGGGTACTGTGTCTTCTCAGGGAAAGCA  
GAAGTCCTGGAGCCCTTCACGTGGGT

>2356

GCTGTCCTGGCTGTCCTAGCTGTCTAGGAGCTGTGGTGGCTGTTGTGATGTGTAGGAG  
GAAGAGCTCAGGTAGGGAAGGGGTGAGGAGTGGGGTCTGGGTTTTCTTGTCCCACTG  
GGAGTTTCAAGCCCCAGGTAGAAG

>2357

CGGGTAGCAACTGTGACCTTGATGCTGGCGATGCTGAGCACCCCGGTGGCTGAGGGCA  
GAGACTCTCCCGGTAAGTGCAGGGCCACTGCTCTCCAGAGCCGCCACTCTGGGAACA  
GGCTCTCCTTGGGCTGGGGTAGGGG

>2358

CGGGCGGAGTTGGACACGGTGTGCAGACACAACCTACCAGTTGGAGCTCCGCACGACC  
TTGCAGCGGCGAGGTGAGCGTCGTCGCCCGTCTGCGAGGCCCATCCTTGGCAGGGGC  
CCAGAGTCTCTGCCGCAGGAGGGGCG

>2359

CAGCGTGGAGACGTCTACACCTGCCACGTGGAGCACCCCAGCCTCCAGAACCCCATCA  
TCGTGGAGTGCGGTAAGGGGATATTGAGTTTCTGTTACTATGGGCCCCACAAGACAAA  
GGGCAGAGCTCCTTCTGACCCATT

>2360

ATTGGAGGCTTCGTGCTGGGGCTGATCTTCCTCGGGCTGGGCCTTATTATCCATCACAG  
GAGTCAGAAAGGTGAGGAACCCCAAGGGAAGGGGAAGATGGGCTGTGACCCAGA  
CCCTCTGTTTCAGGGAGGTCCTGTCT

>2361

AGGGACACCGCACAGATTTTCCGAGTGAACCTGCGGACGCTGCGGCGCTACTACAATC  
AGAGCGAGGCCGGTGAGTGACCCCGGCCAGGAGCAGGTACGACCCCTCCCCATCCC  
CCACGGACGGCGCGGGTCCCCTCGA

>2362

CTGGAAGACACATGCGTGGAGTGGCTCCACAAATACCTGGAGAAGGGGAAGGAGACG  
CTGCTTCACCTGGGTAAGAGGGTCCACAGGGCTACTCTCCCATCTCCTTCTTGGGCTAG  
GACTGTGCCCCACAGCTGACAGACC

>2363

GGAGAGGAGCAGAGATACACGTGCCATGTGCAGCATGAGGGGCTACCCGAGCCCGTC  
ACCCTGAGATGGAGTAAGGAGGGGGATGGGAGGTCATGTCTTCTCAGGGAAAGCG  
GGAGCCCTTCTGGAGCCCTTCCGCAG

>2364

CTGGTTCTCCTTGGATCTGTGGTCTCTGGAGCTGTGGTTGCTGCTGTGATATGGAGGAA

GAAGAGCTCAGGTGGGGAAGGGAGAAGGGTGGGGTCTGAGTTTTCTTGTCCCACTGG  
GTGTTTCAAGCCCTAGGTAAAAGT

>2365

TGGGATCATGGTAGTAGGAACCTCCTTTTACTCCTCTCGGAGGCCCGGCCCTTACCCA  
GACCTGGGCGGGTGATGCGGGGTCGGGATGGAAACGGCTTTACCGGGAGTTACACAG  
GGGCCGGCCGGCGGGGGCGAAGGA

>2366

AGGGAAACCGCAAAGATTTTCCGAGTGAATCTGCGGACCGTGCGGGCTTACTACAATC  
AGAGCGAGGCCGGTGAGTGACCCCGGCCAAGGGAGCAGGTCACGACCCCTCCCCATC  
CCCCACGGACGGCGCGGGTCCCCTC

>2367

CTGGAAGACACATGCGTGGAGTGGCTCCACAAATACCTGGAGAAGGGGAAGGAGACG  
CTGCTTACCTGGGTAAGAGGGTCCACAGGGCTACTCTCCATCTCCTTCTTGGGCTAGG  
ACTGTGCCACAGCTGACACACCT

>2368

GGAGAGGAGCAGAGATACACGTGCCATGTGCAGCATGAGGGGCTACCCGAGCCCGTC  
ACCCTGAGATGGAGTAAGGAGGGGGATGGGAGGTCATGTCTCTTCTCAGGGAAAGCG  
GGAACCCTTCTGGAGCCCTTCCGCAG

>2369

CTGGTTCTCCTTGGATCTGTGGTCTCTGGAGCTGTGGTTGCTGCTGTGATATGGAGGAA  
GAAGAGCTCAGGTGGGGAAGGGAGAAGGGTGGGGTCTGAGTTTTCTTGTCCCACTGG  
TGTTTCAAGCCCTAGGTAAAAGTG

>2370

GGGGTCATGGCGCCCCGAACCCTCCTCCTGCTGCTCTCGGGGACCCTGGCCCTGGCCG  
AGACCTGGGCGGGTGAGTGCGGGGTCAGGAGGGAAACGGCCTCTGCCGTGAGGAGC  
GAAAGGTCCGCCTGGCTGGGGCGCAG

>2371

GGAGAGGAACAGAGATACACATGCCATGTGCAGCACAAGGGGCTGCCCAAGCCCCTC  
ATCCTGAGATGGGGTAAGGAGAGAGATGGGGGCGGTCATGTCTCTTAGGGAAAGCAG  
GAGCCCCTCTGGAGACCTTTAGCAGG

>2372

GGTATCATTGCTGGCCTGGTTCTCCTTGGAGCTGTGGTCACTGCTGTGATGTGGAGGAA  
GAAGAGCTCAGGTGGGGAAGGGTGAGGAGTGGGGTTTGAGTTTTCTTGTCCCACTG  
GGGGTTTCAAGCTCCAGGTAGAAA

>2373

GGGGTCATGGCGCCCCGAACCCTCCTCCTGCTGCTCTCGGGGACCCTGGCCCTGGCCG  
AGACCTGGGCGGGTGAGTGCGGGGTCAGGAGGGAAACGGCCTCTGCCGTGAGGAGC  
GAAAGGTCCACCTGGCTGGGGCGCAG

>2374

AAGGCCCAGGCACAGACTGACCGAGTGAACCTGCGGACCCTGCTCCGCTACTACAAC  
CAGAGCGAGGCGGGTGAGTGACCCCGGCCCGGGGCGCAGATCACTTACTCCCCGCTC  
CATGCCCTACGGACGGCCCTGGTCCC

>2375

CTGGAGGGCACCTGCATGGAGTGGCTCCGCAGACACCTGGAGAACGGGAAGGAGAC



GCTGCAGCGCGCGGGTACCAGGGGCCATGGGGAGCCTGCTCGATCTCCTGTAGATCTC  
CCGGGCTGGCCTCGCACAAGGAGGGG

>2376

GGAGAGGAACAGAGATACACATGCCATGTGCAGCACAAAGGGGCTGCCCAAGCCCCTC  
ATCCTGAGATGGGGTAAGGAGAGAGATGGGGGCGGCCATGTCTCTTAGGGAAAGCAG  
GAGCCCCTCTGGAGACCTTTAGCAGG

>2377

CTGGTTCTCCTTGGAGCTGTGGTCACTGGAGCTGTGGTCACTGCTGTGATGTGGAGGA  
AGAAGAGCTCAGGTGGGGAAGGGGTGAGGAGTCGGGTTTGAGTTTTCTTGTCCCACT  
GGGGGTTTCAAGCTCCAGGTAGAAA

>2378

GCCAGGGGCTTCATGCTGGGGCTCATCATCTGTGGAGTGGACATCTTCACGCACAGAA  
GGAGCAAGAAAGGTGAGAAATCCTGTGAGGTGACCGATACCCACCTTTCTCCTGACTT  
GCTCACCTTCTTCCATGATGAGG

>2379

CTCCGTGCCGGACGGGTTCTCTCCGAGCTCACCCAGCAGCTGGCGCAGGCCACCGG  
CAAGCCCCCCCAGGTTTGCCGGGAGGGGACAGGAAGAGGGGGGTGCCACCGGACG  
AGGGGTTCCGCGCTGGGAGCTGGGGAG

>2380

CGCAGAACCGCTCCTACAGCAAGCTGCTGTGCGGCCTGCTGGCCGAGCGCCTGCGCAT  
CAGCCCGGACAGGTACGCGGAGTCGCGGAGGGGCGGGGAGGGGCGGCGGCGCGCG  
GCCAGGCCCGGGACTGAGCCACCCGC

>2381

CTACGGCGGCTGGGGGCCTGGCTGCGGGACCCTGGGGGGCAGCGCCTGGTGGTCCTA  
CACCTGGAGGAAGGTATGTGGGGCCCAGCCCCAAGCTTGGCACCGCCGTCTTCCTTCA  
GGTGGGCCGGGTCTCCTAGGGAAG

>2382

GCTGCTGGTGCTGTACCCTGGGCCTGGCCCTGAGGTCACTGTGACGAGGGCTGGGCTG  
CCGGGTGCCCAGGTACCAGGGAGTTGCATGGGGCAGTGCCCGGGCCGTGGCGGGGGG  
CATGAATTTGTTGCAGGGTCTGCAG

>2383

GCGGTGGACCGCCCTGCGGGGGCCTGGCGCGGCTCCGGGCTGGCCTTGACCCTGCAG  
CCCCGCGGAGAGGGTAGGTCCGCGTGAGAGGGACGGGGAGCCGGGTGCACTGCC  
CCGGGCCCCCAGCCCCCTGAGCCAGCCG

>2384

TGCCGCGGTCCGAGCCCGCGCCGCTGCCTGCGCACGGCCAGCTGGACACCGTGCCCT  
TCCCGCCGCCAGGTGCGCGCAGGCACCGGGACACGGGGCAGGAGCGGGCGGGGGC  
GGCGTGGCCTCGTGGCCGCTCTCAACT

>2385

CACCGAGGCTTCCTCCTCCTCACCTCCTCGCCCTGCTGGCGCTCACCTCCGCGGTGCG  
CCAAAAAGAAAGGTTATGGGGGATGATCGAAGGAGGGCTGGGGACGGGCAGGCGAG  
GCCCCTCCACTTCTGGGCTGGGCCGC

>2386

GGCACCTGCGGGGCCCAGACCCAGCGCATCCGGTGCAGGGTGCCCTGCAACTGGAAG

AAGGAGTTTGGAGGTGAGGCGGGGGGCAGTCAGAGGGCAGGAGACGGGGGCACAGC  
CTCGCCGAAGCCTGGGGGGACCCTTGG

>2387

AATGCTCAGTGCCAGGAGACCATCCGCGTCACCAAGCCCTGCACCCCCAAGACCAAA  
GCAAAGGCCAAAGGTCAGCGAAAGGAGAAGGGGGTGGGGCTGTCGCGGGGGGCTGC  
CCCCCCCCCCCCGCCTGTGAGGGGAC

>2388

CACCGAGGCTTCCTCCTCCTCACCTCCTCGCCCTACTGGCGCTCACCTCCGCGGTTCGC  
CAAAAAGAAAGGTGATGGGGGATGATCGAAGGAGGGCTGGGGACGGGCAGGCAGGC  
CCCTCCACTTCTGGCTGGCCGCCTG

>2389

GGCACCTGCGGGGCCCAGACCCAGCGCATCCGGTGCAGGGTGCCCTGCAACTGGAAG  
AAGGAGTTTGGAGGTAGGCGGGCGCAGTCAGAGGGCAGAGACGGGGGCACAGCCTC  
GCCGAAGCCTGGGCGGACCCTTGGCGG

>2390

AATGCTCAGTGCCAGGAGACCATCCGCGTCACCAAGCCCTGCACCCCCAAGACCAAA  
GCAAAGGCCAAAGGTCAGCGAAAGGAGAAGGGGGTGGGGCTGTCGCGGGGGGCTGC  
CCCCCCCCCCCCGCCTGTGAGGGGACA

>2391

GCACCCAGACACCCTGAACCAGGGGGAATTCAAAGAGCTGGTGCGAAAAGATCTGCA  
AAATTTTCTCAAGGTAGGGCTGGACTCTGGCAGGTCTGACCCAGCCTCACCGCAGTTT  
GGGTTGACAAGGGAGGATGGGAGTA

>2392

GAATTTCCATGCCGTCTACAGGGATGACCTGAAGAAATTGCTAGAGACCGAGTGTCTT  
CAGTATATCAGGGTGAGGAGGGGCTGGGTGTGGCGGGGGCTCTCTGCCTGGTCCTGGG  
GCTGCCCTGGGCCAGCGGTCCTCC

>2393

GAATTAAGTGAAACTGCCAGCATACTCATGCATGCAACAGCACATTCTCTGGTGCTTGT  
GGATGAATTAGGTAAGACATTAACTTCTCATTTGAAGACTATCTTAAAAACATTTGTAC  
AAATAACTATTTTATAGAAG

>2394

ATTTTCAACTCACTACCATTTCATTAGTAGAAGATTATTCTCAAAATGTTGCTGTGCGCCT  
AGGACATATGGTATGTGCAAATTGTTTTTTTCCACAAATTCGGTTTTTTGAGAGGGCAC  
TTCTGTTGCTAGCACATGTAT

>2395

AAGTTATTCAAAGGGACATAGAAAAGCAAGAGAATTTGAGAAGATGAATCAGTCACT  
ACGATTATTTCCGGTAACTAACTATAATGGAATTATACTAACTGACCTTAAGTTTC  
AAAGAAACAGTAAAAGGGGAAG

>2396

TTCCCTTCTCGCTTGGGAACTCTAGTCTCGCCTCGGGTTGCAATGGACCCCAACTGCTC  
CTGTGCCGCTGGTAAGGGACGCCCGGGTTCTGTGCCTTGGAATGCCAAATCCCAGAC  
ACCATAGAGAGTGTCCCTGGGTT

>2397

CCCGCTTCTCTGAAAGGCTCTCCTTGCAGCTGCTTAGATACTGAATTTTTTTTCGGGAAG

TGAAAAACCAGGTAAGCATCGAAGTCCACTTGTCTTTTAATTTACTTTTTTATCAGTTTA  
ATTCTGAGATGAGTCGAATGC

>2398

GCAGCGCATCCTGGCGACGGAGGGCGACATGGAGCTGGACGAGGCCGGCGACGTCAT  
CGGCGTGCTGCGGGTGCGGAGGGGCGGGCCGGGCCTGAGCGTGCGGGGTTCTTGCTA  
AGGTCTCCGAGTCGGGTTCTGATCCA

>2399

CTCAGCGGCTGCCCCACCATGGCTACCTGGGCCCCTCCTGCTCCTTGCAGCCATGCTCCT  
GGGCAACCCAGGTAAGGCCTTCCCCTCGGGATCGATCCTGATGGCCCACCCAGCCTCG  
CACTCTCAGGCTGGCTGAACCTG

>2400

CGACCTGGCAAGAGCCCACCTGCGTGATGAGGAGAAATCCTGCCCCGTGCCTGGCCCA  
GGAGGGCCCCCAGGTACGTGTTGGCTCTCTGCTCACCTGCCACAGTCCCTCTCCTTTCC  
CTCCTCCCTGGTGGCTCCTGGGGT

>2401

GGGCCGTGACTACAGGACCTGTCTGACGATAGTCCAAAACTGAAGAAGATGGTGGAT  
AAGCCCACCCAGGTGAGGCCAAGGGGCTACAGAGCCTCCTGTCTGCTGCTCAATGGA  
GGGGCCAGCCTGTGACCAGGTCGGG

>2402

CAGGGCCTCGTGCCCGGAGAACTGCCCAGCAGATCTGTGAGGACCTCAGGTTGTGTA  
TACCTTCTACAGGTGAGTGCAGAGGTGACAGCAGGGATACCTCCTGAGGGTTGGAGAC  
AGCTTCCCCCAGGATATATCAAAG

>2403

ATTGCAGCGGACATCCCAGAAGTGGTTGTTTCCCTTGCATGGGACGAAAGCTTGGCTC  
CAAAGCATCCAGGTGAGAGAGGCAGGCATGCAGAGCTGCTAAGTCTAGAGGGAAGGA  
CGGGAGAGAGGTTCCAGAGTTGGGT

>2404

CTTCTTCTGGACTCATCTGCGCCACTTGTCCGCTTCACACTCCGCCGCCATCATGGTGA  
AGCTCGCGAAGGTAAACGGCCTTGAGCGCGACGCAGACGTGTAGGCCTGCTTCCGAG  
GGGCGAGCGCGGCGCCGCGGGGAG

>2405

GGAGGTAGAAGAAGATAGTGAAGATGAGGAAATGTCAGAAGATGAAGAAGATGATAG  
CAGTGGAGAAGAGGTAATTTTATCCAACCTTAATGCAGAATTATGTTAAAACTACAAAT  
GGAGAGTTAAGACATGAAATTGGA

>2406

CCTGCCTCAGAGGATGAGGACGATGAGGATGACGAAGATGATGAGGATGACGATGAC  
GATGAGGAAGATGGTAAGGAGTTGTCTTGGTAGTTACTGGGCTTCTGATTACAAGGTAT  
CTTGAGATTCTGGGATCACATATT

>2407

GACGACGACGAAGATGATGAAGATGATGATGATGAAGATGATGAGGAGGAGGAAGAA  
GAGGAGGAGGAAGGTACTTAAATTAGATTCTGACATACGACATGAGTTATGTTTAAAGG  
AGGCACTTAAGTGTTTGTGGCTAC

>2408

CCTGGAAAACGAAAGAAGGAAATGGCCAAACAGAAAGCAGCTCCTGAAGCCAAGAA

ACAGAAAGTGGAAGGTAAC TTGCAGAATTAGGGGATATGGGGGAGATAAACAGCACA  
AATGATGAATAACAAAGGGACTTAATA

>2409

AAACTGGTATCAGCGATGTTTTTGCTAAAAATGATCTTGCTGTTGTGGATGTCAGAATT  
GGTATGACTAGGTAGCTGCTTCACTGCACGTTACATAACCGTGGGTCTGTAAATTTTTCCT  
TCCCCTGTTAGCACAGTTACT

>2410

CTCACTGGTTTGAAAGTCTTTGGCAATGAAATTAACTAGAGAAACCAAAAGGAAAA  
GACAGTAAGAAAGGTATGTAAGGCTTTATGAGTTATGCAATGAACTCAGGAGCTAGAC  
TGCTAGGGAAAATGCTTTGTAACCC

>2411

ATGAATTGAAAGAAGTGTTTGAAGATGCTGCGGAGATCAGATTAGTCAGCAAGGATGG  
GAAAAGTAAAGGGTATGTTCTTCTATTGAAATGTAAGGGTTTTATTAACATTAATGCACT  
TCCTGCTTTATAAAAGAAATAT

>2412

TCCCTGTACTATACTGGAGAGAAAGGTCAAAATCAAGACTATAGAGGTGGAAAGAATA  
GCACTTGAGGTGGTAAGAAATTAGGCTTGTTCCAAGGTTTTTCAGAATTGGTTGAGGGA  
ACTCTTCTAGTCTTTGTATTTTCAT

>2413

CTCTTCAGGAAGTATTTGAGAAAGCAACTTTTATCAAAGTACCCCAGAACCAAAATGG  
CAAATCTAAAGGGTAAGATAATACCTTTGTATCATCAGTTATAGGCCTATATATGTCTTAG  
AGGTCTAAGGACGTAAGGTCA

>2414

AGGGAAATTGAGGGCAGAGCAATCAGGCTGGAGTTGCAAGGACCCAGGGGATCACCT  
AATGCCAGAAGCCGTAAGTTCACCTGGTTAGGGTGCTGTGGTTGGGGGTAGCACTCTC  
GGTGCTTTGTTTATTTTTGCACAAA

>2415

TAAAGGAGTCATTTGACGGCTCCGTTCCGGGCAAGGATAGTTACTGACCGGGAACTGG  
GTCCTCCAAAGGGTAAGGGAAGGAAGCGTGAGTGCTGCTTCCACTTGAAGGGGTTTT  
TGTTCTGTGCAGACCTTGAGTCTAA

>2416

TTTGGAGGACGAGGTGGTGGTAGAGGAGGCCGAGGAGGATTTGGTGGCAGAGGCCGG  
GGAGGCTTTGGAGGTAAGGCACGCAGAGATAATGACACCACATAGCATGTGCTCTTCA  
GACCCTGTGCCCTGTCACGGTTCCT

>2417

CGGCTGCGACTCAGGCTCCGGCGTCTGCGCTTCCCCATGGGGCTGGCCTGCGGCGCCT  
GGGCGCTCTGAGGTGAGGGACTCCCCGGCCGCGGAGGAAGGGAGGGAGCGAGGGCG  
GGAGCGGGGCGGGCTGCGGGCCCCGG

>2418

GAATTCCTGGAGAGTTGCCTTTGTGAGAAGCTGGAAATATTTCTTTCAATTCCATCTCTT  
AGTTTTCCATGTAAGTATTCAGTTTACATTTATGTTGCAGGTAAATCTTAAGAATTGTATT  
GCTAAGGCTTCTAAGTGAA

>2419

TCCTTATCCCAGTTGATTGTGCAGAATACACTGCCTGTGCTTGTCTTCTATTACCATG

GCTTCTTCTGGTAGGTAATCTATTTGGAAAATCTGAAATTGTAATGGGCTTATGATTTTA  
GATTGAGATGGCTCAGGTCT

>2420

TCCAAAGAAGAAGGATCTTTCCCTGGAGGAAATTCAGAAGAAATTAGAAGCTGCAGA  
AGAAAGACGCAAGGTAAACGAAGCAATTCACAGAAAGCAGGATATTAATTTATGTAAT  
GGGCAGATCAATTTTATTTCTATAA

>2421

CAAAATGGAAGCTAATAAAGAGAACCGAGAGGCACAAATGGCTGCCAAACTGGAACG  
TTTGCGAGAGAAGGTTGGTTTCTTACTTTGTAAAAGGGTTGAGCTTGGAGTTTGATGC  
ACCAATGAGTTGGCTTGAACCTAAGT

>2422

GAGCACAGCATCGTCGGGACCAGACTCGTCTCAGGCCAGTTGCAGCCTTCTCAGCCA  
AACGCCGACCAAGGTACAGCTTCAGTTTGCTACTGGGTTGTGCATTCAGCTGAATTTCA  
TGGGGAAGTCCAAATTCTAAGGAA

>2423

CTCCGCCTGCTACATCCAGAACTGCCCCCTGGGAGGCAAGAGGGCCGCGCCGGACCT  
CGACGTGCGCAAGGTGAGTCCCCAGCCCTGGTCCCGCGGCGCTCCGGGGAGGGAGGG  
ACCCGCAGCCACAGGGGCGCGCCCCG

>2424

CCCTGCCAGTCCGGCCAGAAGGCGTGCGGGAGCGGGGGCCGCTGCGCCTTGGGCCTC  
TGCTGCAGCCCGGGTGAGCGGGGCAAGGCGCTCCGGGGCCAGGGGGAGGCGGGCGG  
GGGTGCGGCCGGGATTCCCCTGACTCC

>2425

CACACCAGTTGAAGCAGCATGTCATCGATGGAGAAAAAACCATTATCCAGAATCCCAC  
AGACCAGCAGAAGTAGGTGCCAACCCTACTTATTACCTTCTACCACACAAGACTAGTC  
ATCAGGTTTTTTTCTATACTCCCA

>2426

TGAAAAAGCTGAATTTGAGGTACATGAAGTATATGCTGTGGATGTTCTCGTCAGCTCAG  
GAGAGGGCAAGGTGAGGAGAGTACCAGAGTTGGCAAAGAGGGGTGACTGAGAGTGT  
TCACCAGACCAAATGTTACTTAAAT

>2427

AAATGAAAACCTTCACGTGCCTTCTTCAGTGAGGTGGAAAGGCGTTTTGATGCCATGCC  
GTTTACTTTAAGGTAACCTAAGCAAATGATAGTACTTGGAACCAGTCTGGACTCACAGAC  
CATACACCCAGGAACACTTTTTTC

>2428

CGGATGGGTGTGGTGGAGTGCGCCAAACATGAACTGCTGCAACCATTTAATGTTCTCTA  
TGAGAAGGAGGGTGAGTTCCAAAAAGAGCTTCACCTTTGGATTCCCTGATTATAAGATAT  
CCTTCCTGTAAGTTCAGAAGAG

>2429

GATAACCAGTGGTCCCTTCGAGCCTGACCTCTACAAGTCTGAGATGGAGGTCCAGGAT  
GCAGAGCTAAAGGTTAGTATGGAATAGAAGGTGGTGAGTATGTACATGGTATCCTGCTT  
GGGAGTGAGGGCTAAATGCCAGC

>2430

CGGCCACCACCAGCTGGCCAAGGAGGTGCTTATTAAGAAGGGCAAGGACTTCTCTGG

GCGGCCTCAAATGGTAAGTGGTGCCCATCTCCTCCCTGCCCCCTTACCACCCCCTGGG  
ATTGGTTCAGGTCTTCAGACCATG

>2431

CTGCATCGAAGGCTGGCGATGGCCACCTTTGCCCTGTTCAAGGATGGCGATCAGAAGC  
TGGAGAAGATCAGTGAGTGCCAGGCTGGCCCCTGGGGCTGGGGCTGGATCCCACAGG  
AGCTGCTGGAGGGAGAGGAGGGTTG

>2432

GAATTACAATGAAGGCATCATAGACAACCTGAGCAAAGACAGCCTGGTGGACCTAGTC  
CCCTGGTTGAAGGTGAGATGCTGCCAGCCCTGCCTTCAGGTTCTAGTAGACCCTGACA  
TTGTCCCCAATCTTCCTTCCTTTT

>2433

CCTGGAAAAATTAAAGAGCCATGTTAAAATACGAAATGATCTGCTGAATAAAATACTTG  
AAAATTACAAGGTAGGTGATAGAGCAGAAGAGAATATGAGTTAGGCTAAAAGGAATCA  
CAAGAGCAGGGTGGAGTCCATTC

>2434

TGGGGCTGGCGTGGAGACCACCACCTCTGTGGTTAAATGGACCCTGGCCTTCCTGCTG  
CACAATCCTCAGGTGTGCTTCCCCCTCATTGATCCTAGACCCCAGCCAGCCCAATCTCT  
GGGCTCCAGAGAAAGGGAGAGCC

>2435

TCCGAGAGGTGCTTCGCCTCAGGCCCCGTGGCCCCCTATGCTCATCCCCACAAGGCCAA  
CGTTGACTCCAGGTGTGCCTGCCCTCCCAGTGACATCTAGCCCCATGATGCATTCCTG  
CTTGCCAGCCCACCTGGCTCCCC

>2436

GTTATCATCAATCTGTGGGCGCTGCATCACAATGAGAAGGAGTGGCACCAGCCGGATC  
AGTTCATGCCTGGTGAGTCTGTCTGTCTGCGCCCTGGGCCACACAGCGAGCCTGGA  
CTCTGCTCCAACCACCCCAGTACC

>2437

GATGGCTTCTCATCGTCTGCTCCTCCTCTGCCTTGCTGGACTGGTATTTGTGTCTGAGGC  
TGGCCCTACGGTGAGTGTCTGTGACATCCCATTCTACATTTAAGATTACGCTAAAT  
GAAGTAGAAGTGAATCCTTC

>2438

CTGCCATCAATGTGGCCGTGCATGTGTTTCAAGGCTGCTGATGACACCTGGGAGCC  
ATTTGCCTCTGGGTAAAGTTGCCAAAGAACCCTCCCACAGGACTTGGTTTTATCTTCCCG  
TTTGCCCTCACTTGGTAGAGAG

>2439

CAAAGTGGAATAGACACCAAATCTTACTGGAAGGCACTTGGCATCTCCCCATTCCAT  
GAGCATGCAGAGGTGAGTATACAGACCTTCGAGGGTTGTTTTGGTTTTTGGTTTTTGCTT  
TTGGCATTCCAGGAAATGCACAG

>2440

CCTCCCATGGCCCTGCCAGTGTATCTTGGATGCTGCTTTCCTGCCTCATGCTGCTGTCT  
CAGGTTCAAGGTGAGATTGCTTTGCCTCTAGCACTGGGTTCCTATGAATCCTCAGAGC  
TAACAAGAGGAGGAAGGCTCC

>2441

AGGCTCCAAGGCCTATGGCTCCCCTGCTATGCCTTGTTTTTGTACCAAAATCCTGGA

CAGATGCAGATGTGAGTGGTTAGATGTGGTGGTGGAGGTGACCGGTCTCAGGGGGAG  
GAGGGTCTCCATTCAGGAGAGTTC

>2442

GTCCTCCCTGGTGAAGAGCATTGGTAACAGCTACTCATACGTCTGGATTGGGCTCCATG  
ACCCACACAGGTGCCAGTATATCCTCCCTCTCTGTTACCTCTCAAGGTGCTATTGTTGC  
CCAGGCCCACTCCCTGTCCCC

>2443

TTTGCATGGGAGAGAAATCCCTCCACCATCTCAAGCCCCGGCCACTGTGCGAGCCTGT  
CGAGAAGCACAGGTAAGAAACAGAGGAGCTGCCTCTTCCCAGTGTTTTCCATCTCATC  
CCCCATTCTGGGTCTGACCTTCA

>2444

TGTGGGGTGGAATGAGCTGGAAGGCCGTGATGCCATCTTCAAGCAGTTTCATTTCAA  
GACTTCAACAGGGTATGGCACCAGGGTGGGACAGAGTTTTCTGAGACGGGCTGATGG  
GGTCACCTTACAAAGCATGTTCTCT

>2445

CATGACAAGAGTGGCCCTGCAGGCTGAGAACTGGACCACCATCCTGAATGGTTTAAC  
GTGTACAACAAGGTGAGTGATGCTGTGTGCCTCTGTTGTGCTCTGCCCCCATCCAAATA  
CTGCGAACTCTGACACATTCTGA

>2446

GAGTGGGTCCCCGAGCTCTGTGACCTTATGCTCCACACTAACTCTGGCAGAGCCTCC  
GTTTCCTCATAGGTAAGATGGAAATAATTACACCCTCTGGATGGTGTGACTGAAGATTA  
AATACAGCGGGTGCTCTCACTCA

>2447

ATTGTGGACTTGCTTAAGAACCTCGATAGCAATGCGGTCGTGATCATGGTGAATTACAT  
CTTCTTTAAAGGTAAGGCCCTTGGGCCCCAAACCTGCACTTTCTTTGGCTTTTCTGCTGC  
TTTTATCTAAAGAATACCCAAT

>2448

AGATGCAGCAGGTGGAGAATGGACTGAGTGAGAAAACGCTGAGGAAGTGGCTTAAGA  
TGTTCAAAAAGAGGTACTTTTCACTACCCCAGGGCCAGCCTAAACCCACACAGCCCC  
AGGGAGACACACACGCCCTACCAGG

>2449

CAGTAACGTCTTCACCTCCCATGCTGATCTGTCCGGCATCAGCAACCACTCAAATATCC  
AGGTGTCTGAGGTGGGTTTCAAGCTCCTATGCATCTGCTTCCCAAGATCTATTCTGTT  
CTATTCTTTCTATTCTACTCTA

>2450

CCCTGCGGTCTGAGGGCTTCGACACCTACCGCTGCGACCGCAACCTGGCCATGGGCGT  
GAACCTCACCAGGTGAGCCTCGCGCCCCGGGAAGCCGCCCCGGCCCCGCCTGCACCTC  
CGGCTGTGGCGAGCGCTTCGAGCCT

>2451

AATGAAGATATCATTACACTAAGGGCCGAAGATAACGCGGATACCTTGGCGCTAGTATT  
TGAAGCACCAAGTAAGTCGTACCTTTTTACCAGGTCACGAAGCTACAGGAAAATCAA  
ACTCTGTGTGAGTAGAACTCAA

>2452

AAGTGGAGAACTTGGAATGGAAACATTAAATTGTACACAGACAAGTAATGTGATAAA

GAGGAGGAAGCTGTAAGTAGTTTTTAAGTAAAAAGAAAATAGTTTGAAGAGAATTATA  
ATACTGCTTATTAGGTAAATTGCT

>2453

AACTTCTTTACAAAAGCCACTCCACTCTCTTCAACGGTGACACTCAGTATGTCTGCAGA  
TGTACCCCTTGGTAAGATAATAAATTTGAACCTTGTTTTGATGGTAGTCATATGTGATAC  
ATACTCCTCAGTAATTAACCA

>2454

TGTCCATGTGCAAGTCTGTGGTGGCCCCTGCCACGGATGGTGGCCTCAACCTGACCTC  
CACCTTCCTCAGGTGGGACAGCGGGCAGGTGGGTTTCTGGGACGGAGAGGTCCAGGG  
ACACCCTCGGGCCTAACCCCTGACC

>2455

CAGTGTGAGACCCGAACCATGCTGCTGCAGCCCGCGGGGTCCCTCGGCTCCTACAGCT  
ACCGGAGTCCCCGTGAGTGGGGCCTCCACCGGCCCTGGGAGCCTGGGGGACACTTGC  
CGGGACGACTCTGGGCCAGCCCCCT

>2456

CAGTACGCGCTGCTGTACAGCCAGGGCAGCAAGGGCCCTGGCGAGGACTTCCGCATG  
GCCACCCTCTACAGTACGTGCCCCGTGGACGCCGCCACACGCAGGCCTGACCAGAG  
GGGGGCTCCCCAAGACCCAGGGCAGG

>2457

GAGAAATTCACCGCCTTCTGCAAGGCCCAGGGCTTCACAGAGGATACCATTGTCTTCC  
TGCCCCAAACCGGTGAGGGGTCTTAAGTATGGGGAGAGGATCAAGGTCAGATTAGA  
GGCAGGCAGGCAGTCTCCTGACTGG

>2458

TTCACCACCACCATGACACCGGGCACCCAGTCTCCTTTCTTCCTGCTGCTGCTCCTCAC  
AGTGCTTACAGGTGAGGGGCACGAGGTGGGGAGTGGGCTGCCCTGCTTAGGTGGTCT  
TCGTGGTCTTTCTGTGGGTTTTGC

>2459

GTTTAATTCTCTCTGGAAGATCCCAGCACCGACTACTACCAAGAGCTGCAGAGAGAC  
ATTTCTGAAATGGTGAGTATCGGCCTTTCCTTCCCCATGCTCCCCTGAAGCAGCCATCA  
GAACTGTCCACACCCTTTGCATC

>2460

GAGACACAGTTCAATCAGTATAAAACGGAAGCAGCCTCTCGATATAACCTGACGATCT  
CAGACGTACGCGGTGAGGCTACTTCCCTGGCTGCAGCCAGCACCATGCCGGGGCCCCCT  
CTCCTTCCAGTGTCTGGGTCCCCG

>2461

CTGGGGCATCGCGCTGCTGGTGCTGGTCTGTGTTCTGGTTGCGCTGGCCATTGTCTATC  
TCATTGCCTTGGTGAGTGCAGTCCCTGGCCCTGATCAGAGCCCCCGGTAGAAGGCAC  
TCCATGGCCTGCCATAACCTCCT

>2462

GTACCCACCTACCACACCCATGGGCGCTATGTGCCCCCTAGCAGTACCGATCGTAGCC  
CCTATGAGAAGGTGAGATTGGCCCCACAGGCCAGGGGAAGCAGAGGGTTTGGCTGGG  
CAAGGATTCTGAAGGGGGTACTTG

>2463

TGCGGCAGTGCAGCCCTTGGGACTTCCCTCGCCTTCCACCTCCTGCTCGTCTGCTTCAC



AAGCTATCGCTGTGAGTGGCTGGGGGCTCAAGCCTGGGGAAACCCAGGCTGTTTTGTG  
GGGAAACTGAGGCTGGGATGGTG

>2464

CCTCGCCGGAGGAGCTGAACCGCTACTACGCCTCCCTGCGCCACTACCTCAACCTGGT  
CACCCGGCAGCGGTGAGCGCAGGCGCTGAGCGGGACCCCTGGTGCTCTCACCTGCG  
GCCCCGCTCCACCTGGGGGCGTGGC

>2465

GAGACGGCCCGGACACGCTTCTTTCCAAAACGTTCTTCCCCGACGGCGAGGACCGCC  
CCGTCAGGTCGCGGTAAAAGCGCCCGTTACCACACATCCTGCATCCGAGAGAGCGGCC  
TGGCCCTACCCTGGCAACATCATTT

>2466

CGCGCCACCCGCCAGGAGATGCTGTTCTTGGCGTTGCTGCTCCTGCCAGTTGTGGTCG  
CCTTCGCCAGAGGTGAGAGCAGAAACCAGGCTGGGAGGGCCAGCAGCGGCGAGGGG  
GAGTCCGGGAAGCCCTGGGGCTGGGA

>2467

TCCGTCCCAGGCACATCACCAGCCTGGAGGTGATCAAGGCCGGACCCCACTGCCCCAC  
TGCCCAACTCATGTGAGTCCTCGCACTGCATCAGTTAGTGCTCCCGCTCCGTGCCTCCT  
CTGCCCATCCCTCCCCCTTCTAA

>2468

GAGGCGCTCCTTCGACATCCCGCCGCCCCCGATGGACGAGAAGCACCCCTACTACAAC  
TCCATTAGCAAGGTGGGCTGCCTTTGCTGGGAAGGCCTCTGGGAAGCTGCAGAGTGG  
GGAGTCGGGTGGGGGCCCACTGGCT

>2469

AAGGCCGGAAGCGAGTGCTCATTGCAGCCCACGGGAACAGCCTGCGGGGCATTGTC  
AAGCACCTGGAAGGTAGGCCACCTTCAGGAGCCTGGGCAGGGTGGGTGGGCAGCAGC  
CAGCTGGCTTCTCATCTCAGCAAAGT

>2470

AGAATGGGCGGCTTCTGGGCCAGATGGAGGAAGAGGGCATCCTCAGGCGGCTGAAGA  
AGTATGACAACTGGTAAGCTCGGCCCCCGCTGCCTGTCCCAGCACCTGCAGGCAGGG  
CTCCCCTGCGTCTCCTGGGAGTTGG

>2471

CTCGGTGCTGGATGTCAGAGGAGGATTTTGAGAAAGCGTTCAATGCCAGGTTCCCAG  
GGTGATGAAAGGTGAGCGGAACATTGATTTGATTGGGTAAAACAGCAGAGAGCCTTT  
TCTTATTTACATCTATCCTAATGG

>2472

CTGGAAGCACTGGGCGATGGGGAGTTTGTCAAATGCCTCCATTCTGTGGGGTGCCCTC  
TGCCTTTACAAAGTAAGTGTTATTATTTAGAATCAAAAGTCAAAATAAAAAAGAAAGC  
TGAACGCAAACCCCAGTGAGTGCC

>2473

GAAGTGCTTTGCTCTCAGGAATGCCAGCCGGCTGGCCAAGGAGGAAGGGTGGCTGGC  
AGAGCACATGCTGGTGAGCTGCAGGAAGCCCTGATGTGCAGATGAGAGGCCTGGGGG  
GTGGCAGAAACAAACAGCATTACAGT

>2474

CCCAGCCTCCCCGGGTGGAAGGTTGAGTGCGTCGGGGATGACATTGCCTGGATGAAGT

TTGACGCACAAGGTGACTCTTTTAGACCCAACCTCTTGGTAACGATTGGACTCAAGCGA  
ATCGTTGGCCTTCGAAACATGTCA

>2475

ATTGATGAGCCGCTAGCTTCAGGCGTCACCATCACGTCCTGGAAGAATAAGGAGTGGA  
GCTCAGAGGATGGTGTGTCCCTGCCAGAGGCCTGTGTGTGCCGGGCTGCAGGGACTG  
CCTGTTTTGAGCCAGGCACTCACGA

>2476

GATGCTGCCTGGGAGTCTCCGGAAGGTGTTCCCATGAAGGCATTATCTTTGGAGGCC  
GTAGACCTGCTGGTGAGGCTCTCCTTCATTTAGGCTGGGAACATGGGTGTGCTGGGTA  
CCGAAGGCATCTGTGAAATCTCTC

>2477

AGCTGGCAACATGGAGTCTTTGTGGGGGCGGCCATGAGATCAGAGGCCACAGCGGCT  
GCAGAACATAAAGGTAAATCAAAGTCCTGATCTGAAACCACAGAGAAGTGGGATTAG  
AGCACTCTTCGTCACTCTTATGTCTC

>2478

AAAATCAACTCGCTTGCCACCTGCGCGCCGCGCCCTGCAACGACCTGCACGCCACCA  
AGCTGGCGCCCGGTGAGAGCACCCCCCGCTCCGGCCGGGGATGCGGGGCGGCGGCGG  
GATCTCCTGGGTGGGGAGCTGGCGG

>2479

GGGCCCCGCTACTGGGCAGCGGCGGCTTCGGCTCGGTCTACTCAGGCATCCGCGTCTCC  
GACAACTTGCCGGTGAGTGGGCGCCCCGCGGTGGGGAGGGCGCGCCGGGCGGGGGG  
CGCACGGGCGTGCTTTAGCCCGGACG

>2480

GGCGAGCTCAAGCTCATCGACTTCGGGTCGGGGGCGCTGCTCAAGGACACCGTCTAC  
ACGGACTTCGATGGTGAGCCAGGCCCGGGAGGGAGCTGCCAGGTGACTCGGCCCCGG  
CCCGGCCAGTCCGGAGGCCTCGGCC

>2481

GATATTCCTTTTCGAGCATGACGAAGAGATCATCAGGGGCCAGGTTTTCTTCAGGCAGA  
GGGTCTCTTCAGGTAAGTATGAAACCCCTGGCCATGGGGTTATTGGTCTTAATGGGG  
CTATTAGTCTTCATGGGACAGTC

>2482

TCAACTGCTCGGGCCGCGGGCTGCGGACGCTCGGTCCCGCGCTGCGCATCCCCGCGG  
ACGCCACAGCGCTGTGAGTAGCGGGCCAGCGGCACCCGGGAGAGGCCGCGGGGACG  
GGCGGGCGTGGGCGGGTTCCCTGGCCC

>2483

ACGTCTCCCAACCTGCTCCGGGCGCTGGACGTTGGGCTCCTGGCGAACCTCTCGGC  
GCTGGCAGAGCTGTGAGTGTCCCCAGTCGTGCCAGCATGCGGGGCTCACTCCGGGT  
GGGCTGGCGGCACCGCCTCTTGCTG

>2484

ATATAAGCAACAACAAGATTTCTACGTTAGAAGAAGGAATATTTGCTAATTTATTTAATT  
TAAGTGAAATGTAAGTTGTGGTTCTTTGGGTGGGGTCCTGGCTGGACCCCAGGCCCCC  
AATATCCCTTCTGCCCTCCCAG

>2485

ACGTGTGCTGGGCCTGGCTCCCTGGCTGGCCAGCCTCTGCTTGGCATCCCCCTTGCTGG

ACAGTGGCTGTGGTGAGTGCCGGTGGGTGGGGCCAGCTCTGTCCTTCCCAGCCAGGT  
GGGACCTGGGGCCCTGCAGACACTGG

>2486

CAGAACCGCGGTGGTTCAGGCCTGGAGGCCGCCTACAGCATCGTGGCCCTGGGCGAG  
GAGCCGGCCCGAGGTGAGTGTCTGCTGCCCACTCCCCCTCCTCCCCAGGGCCATCCAG  
ATGGGGCAGAGCCTGGTACCCCCGT

>2487

GGGCCGGGGCCGCCCTGGCAATGGTGGACAGTCCCGCCGTGCAGCGCTTCCTGGTCTC  
CCGGGTCACCAGGTGCCTGCCCCACCCCCCGAGGGGCCATAGGTTGGGAGATCTCTG  
AAGCACTGGGGCAGAGACTGCGGC

>2488

CCCACCGGGTGGTGTAACACCGACCTGTGCTCAGCGCCGCACAGCTACGTCTGCGAGC  
TGCAGCCCGGAGGTGTGCGGGGGGCCAGGCAGGGGCCTGAGACGCTGGCTGTGGTTA  
GGGGCCTGCCGAGCGCCCGCGGTGG

>2489

GGACCTGCAGGGACCCCTGACGCCTCTGGCACAGCAGGACGGCCTCTCAGCCCCGCA  
CGAGCCCGTGAGGTAGTCGGCCCCCACGTTCTACAACCTGCCCTCCTGCCTGCCCC  
TGGAGGCCTTGCCTGCCCTGCCAC

>2490

TTTGGGACCCAGGAGCTCCGGCGGGCCCGCCAGCTGCGGCTGCAGGTGTACCGGCTC  
CTCAGCACAGCAGGTGGGACTCTGGGTGGTGGGTGGTGGGTGGTGGGCGCCGCAGGA  
CTCGGGGTGGCCTCTCTGAGCTTTCA

>2491

GCCCTGGAGCCAACATCTGCTTGCCGCTGGACGCCTCCTGCCACCCCCAGGCCTGCGC  
CAATGGCTGCACGTACAGGGCCAGGGCTACCCGGGGCCCCCTATGCGCTATGGAGAGAG  
TTCCTCTTCTCCGTTCCCGCGGGG

>2492

GGAGGAGCCCATCTGTGGCCTCCGCGCCACGCCCAGCCCCGAGGCCCGTGTACTGCA  
GGGAGTCCTAGTGGTGAGTATGGCCGAGGCTCCACCACCAGCCCCAGGCAGGTGCC  
TGCAGACAGGGTGCTCACACAGGGCG

>2493

GCAGTCCCTGACCTTCCAGAACGTGGTCTTCAATGTCATTTATCAGAGCGCGGCGGTCT  
TCAAGCTCTCAGTAGGTGGGCGGGGGTGGGGAGGGGAGGGGATGGGGCGGGGCAGG  
GCGGGGGCGGGCTCCACCTTACCT

>2494

TGTCCCCCAATGCCACGCTAGCACTGACGGCGGGCGTGCTGGTGGACTCGGCCGTGGA  
GGTGGCCTTCCTGTGAGTGA CTGCGGGGGCCGGTTTGGGGTGGGCACCAGGCTCTTGTC  
CCAGCCCCAGCCTCAGCCGAGGGA

>2495

CCGGTTCCAGACCCCTCGGTGGCCCAGGTGCTGGTGGAGCACAATGTCATGCACACCT  
ACGCTGCCCCAGGTGAGGGATGAGGGGGTGAAGGGGGCCACTGCCTTTAGGCTCTGA  
GCACGGGTCCCCCAGCTCCCCAGT

>2496

GCAGCAGGTGCCTGTGAGCGTGCGCGCCTCCCTGCCCTCCGTGGCTGTGGGTGTGAGT

GACGGCGTCCTGGTGGCCGGCCGGCCCGTCACCTTCTACCCGCACCCGCTGCCCTCGC  
CTGGGGGTGTTCTTTACACGTGGG

>2497

TCTGGGGGACGGTGGGTGGCTCGAGGGTCCGGAGGTACCCACGCTTACAACAGCAC  
AGGTGACTTCACCGTTAGGTGGCCGGCTGGAATGAGGTGAGCCGCAGCGAGGCCTGG  
CTCAATGTGACGGTGAAGCGGCGCGT

>2498

GGCGCCCGGGCAGCTGGTCCATTTTCAGATCCTGCTGGCTGCCGGCTCAGCTGTCACC  
TTCCGCCTGCAGGTCGGCGGGGCCAACCCCGAGGTGCTCCCCGGGCCCCGTTTCTCCC  
ACAGCTTCCCCCGCGTCGGAGACC

>2499

CGACCCCAACCTGGAGGACGGCGACCAGACGCCGCTCAGTTTCCACTGGGCCTGTGT  
GGCTTCGACACAGGTGAGTGCCTGGCAGGGCCGTCCTCCATGCCCTCACCCGTCCAC  
ACCCATGAGCCAGAGAACACCCAG

>2500

TGGCGTGGAGTACACCTTCAGCCTGACCGTGTGGAAGGCCGGCCGCAAGGAGGAGGC  
CACCAACCAGACGGTGGGTGCCGCCCGCCCCCTCGGCCACTTGCCTTGGACAGCCAG  
CCTCCCTGGTCATCTACTGTTTTCCG

>2501

AGTGAGCCGCAGCTCCTACGTGTACTTGGAGGGCCGCTGCCTCAATTGCAGCAGCGGC  
TCCAAGCGAGGGGTGAGTGTGAGCGGGGTGTGGGCGGGCTGGGGATGGGTCCCATG  
GCCGAGGGGACGGGGCCTGCAGGCA

>2502

GGCTCTTGCCGCCTCTTCCCCTGAGGGCGCTGTGCACGCCCTCACCACCAAGGTGCACT  
TCGAATGCACGGGTGAGTGCAGGCCTGCGTGGGGGGAGCAGCGGGATCCCCCGACTC  
TGTGACGTCACGGAGCCCTCCCGTG

>2503

GCTGCTGCGGCAGGCCGATCCCCAGCACGTCATCGAGTACTCGTTGGCCCTGGTCACC  
GTGCTGAACGAGGTGAGTGCAGCCTGGGAGGGGACGTCACATCTGCTGCATGCGTGC  
TTGGGACCAAGACCTGTACCCCTGC

>2504

TCTGGTGTCCCTGAGGGTCCACACTGTGGATGACATCCAGCAGATCGCTGCTGCGCTG  
GCCAGTGCATGGTAGGATGGCCCCACCTGCTCACCTGCCCCGCATGCCTGCCAGGG  
CACTGGGTTCAGCCCCCAGGGCA

>2505

CTGCAGGCAGAGACCACCGCGGGCACCGTGACGCCACCGCCATCGGAGACAGCATC  
CTAACATCACAGGTGCCGCGGCCCCGTGCCCCATGCCACCCGCCCGCCCCGTGCGGCC  
CTTTCCTCTGCCTCCCTCCTCCCC

>2506

GTGGTCACCCTGGACAGCAGCAACCCTGCGGCCGGGCTGCATCTGCAGCTCAACTATA  
CGCTGCTGGACGGTGCCTGCAGCGGGTGGGGCACACGCGGCCCCCTGGCCTTGTTCTT  
GGGGGAAGGCGTTTCTCGTAGGG

>2507

GCAGGAGGATCCGCCCAGAGTCACTCCAGGGTGCTGACCACCGGCCCTACACCTTCTT

CATTTCCCCGGGGTGAGCTCTGCGGGCCAGCCTGGCAGGGCAGGGCAGGGCATCATG  
GGTCAGCATTGCCTGGGTTACTGGC

>2508

CACCCGCCACCTCACCGCCTTCGGCGCCAGCCTCTTCGTGCCCCCAAGCCATGTCCGC  
TTTGTGTTTCCTGTGAGTGACCCTGTGCTCCTGGGAGCCTCTGCAGAGTCGAGGAGGG  
CCTGGGTGGGCTCGGCTCTATCCT

>2509

CCTTTCTGTGGGCAGCGGGGCGCTTCAAGTACGAGATCCTCGTCAAGACAGGCTGGG  
GCCGGGGCTCAGGTGAGGGGCGCAGCGGGGTGGCAGGGCCTCCCCTGCTCTCACTGG  
CTGTGCTGGTTGCACCCTCTGGGAG

>2510

ATCTTCCGGATCGCCACCCCGCACAGCCTGGGTAGCGTGTGGAAGATCCGAGTGTGGC  
ACGACAACAAAGGTTTGTGCGGACCCTGCCAAGCTCTGCCCCCTTGCCCCCGCATTGG  
GGCGCCCTGCGAGCCTGACCTCCC

>2511

GTCAATGACTGGCTTTCGGTGGAGACGGAGGCCAACGGGGGCCTGGTGGAGAAGGAG  
GTGCTGGCCGCGAGTAAGGCCCTCGTTCCATGGTCCCCTCCGTGGGAGGTTGGGCAGG  
GTGGTCCTGCCCCGTGGCCTCCTGC

>2512

TTCTCCTCATCTGCCTCTTCCTGGGCGCCAACGCCGTGTGGTACGGGGCTGTTGGCGAC  
TCTGCCTACAGGTGGGTGCCGTAGGGGTCGGGGCAGCCTCTTCCTGCCAGCCCTTCC  
TGCCCCCTCAGCCTCACCTGTGTG

>2513

GGTGTCCAGCGTGGTTGTCTATCCCGTCTACCTGGCCATCCTTTTTCTCTTCCGGATGTC  
CCGGAGCAAGGTGGGCTGGGGCTGGGGACCCGGGAGTACTGGGAATGGAGCCTGGGC  
CTCGGCACCATGCCTAGGGCCGC

>2514

CATCGACAGCTGCCTGGACTCGTCCGTGCTGGACAGCTCCTTCCTCACGTTCTCAGGC  
CTCCACGCTGAGGTGAGGACTCTACTGGGGGTCCTGGGCTGGGCTGGGGGTCCTGCC  
GCCTTGGCGCAGCTTGGACTCAAGA

>2515

CTGGGCCCAGAGGAGGACGGCTTCTCCCTGGCCAGCCCCTACTCGCCTGCCAAATCCT  
TCTCAGCATCAGGTGAGCTGGGGTGAGAGGAGGGGGCTCTGAAGCTCACCTTGCAG  
CTGGGCCCACCCTATGCCTCCTGTA

>2516

TTGCCGAGGGGGTCAGCAGCCCAGCCCCTACCCAAGACACCCACATGGAAACGGACC  
TGCTCAGCAGCCTGTGAGTGTCCGGCTCTCGGGGGAGGGGGGATTGCCAGAGGAGGG  
GCCGGGACTCAGGCCAGGCAGCCGTG

>2517

GGGGAGCTGGGGCCACCCAGCCCAGGCCTGAACTGGGAACAGCCCCAGGCAGCGAG  
GCTGTCCAGGACAGGTGTGCTTGCGTAGCCCCGGGATGCCCTAGCCCCCTCCCTGTGA  
GCTGCCTCTCACAGGTCTGTCTCTGC

>2518

GAGTGTGCGTGGCTCCTGTCCAGCAGCGCCAGCTTCCTGGCCTCATTCTCGGCTGG

GAGCCACTGAAGGTGAGGGGGCTGCCAGGGGTAGGCTACAGGCCTCCATCACGGGGG  
ACCCCTCTGAAGCCACCCCTCCCC

>2519

CCACGGCTTTGCACTCTTCCTGGCCAAGGAAGAAGCCCGCAAGGTCAAGAGGCTACA  
TGGCATGCTGCGGGTGAGCCTGGGTGCGGCCTGTGCCCCTGCCACCTCCGTCTCTTGT  
CTCCACCTCCACCCATGCACGCA

>2520

GGCACGCCTACCGTCTGCAAAGCGCCATCAAGCAGGAGCTGCACAGCCGGGCCTTCC  
TGGCCATCACGCGGTACGGGCATCCGGTGCACTGGTCTGTCTTCTGGGCTTTAGTTTTG  
CCTTTAGTCCAGCCAGACCCTAGG

>2521

TACGTCCACGGGAACCAGTCCAGCCCAGAGCTGGGGCCCCCACGGCTGCGGCAGGTG  
CGGCTGCAGGAAGGTGAGCTGGCAGGGCGTGCCCCAAGACTTAAATCGTTCCTCTTGT  
TGAGAGAGCAGCCTTTAGCGGAGCT

>2522

ACGACGTTGGCTGGGAGAGTCCTCACAATGGCTCGGGGACGTGGGCCTATTCAGCGCC  
GGATCTGCTGGGGTGAGCAGAGCGAGGGCCCCGGGCGTCTACGCCAAGGACAAGGGA  
GTAGTTCTCCAGGAGTGCCGCGGCC

>2523

TGGGCCTGAGCCTGGAGGAGAGCCGCGACCGGCTGCGCTTCCTGCAGCTGCACAACT  
GGCTGGACAACAGGTGGGAGCTCCCTCCCCTGCCCTCTCCGGGGTGGCCGCAGTCAC  
CAGCCAGGAGCCACCCCTCACTCCTC

>2524

CGCCCTCAGCGTCCGCCCCCTTTGCGCTGCGCCGCCTCAGCGCGGGCCTCTCGCTGCCT  
CTGCTCACCTCGGTACGCCCCTCCCCGGCCAGACCCCGCGCCTCCCACCGGCAGCGTC  
CCGCCCCCTCGCGGGGCCCCGCC

>2525

CCAGGTGGCGCAGCTGAGCTCCGCAGCCCGTGGCCTGGCGGCCTCGCTGCTCTTCCTG  
CTTTTGGTCAAGGTGAGGGCTGGGCCGGTGGGCGCGGGGCTGGGCGCACACCCAGG  
GCTGCAAGCAGACAGATTTCTCGTC

>2526

GCCAGAGCTCCTGGGGGTACCTTGGGCCTGGTGGTGCTCGGGGTAGCCTACGCCAG  
CTGGCCATCCTGGTAGGTGACTGCGCGGCCGGGGAGGGCGTCTTAGCTCAGCTCAGCT  
CAGCTGTACGCCCTCACTGGTGTC

>2527

GGACTACGAGATGGTGGAGTTGTTCTGCGCAGGCTGCGCCTCTGGATGGGCCTCAGC  
AAGGTCAAGGAGGTGGGTACGGCCAGTGGGGGGGAGAGGGACACGCCCTGGGCTC  
TGCCAGGGTGCAGCCGGA CTGACTG

>2528

GATCCCAAGGCCCAACTCCCCGAACCACTCAGGGTCCTGTGGACAGCTCACCTAGTGG  
CAATGGCTGCAGGTAAGCGCCCCTAAAATCCCTTTGGCACAACGTGTCCTGAGGGGAG  
AGGCAGCGCCCTGTAGATGGGACG

>2529

GCTTTTTGACCACGCTATGCTCCAAGCCCATCGCGCGCACCAGCTGGCCATTGACACCT

ACCAGGAGTTTGTAAAGTTCTTGGGGAATGGGTGCGGGTCAGGGGTGGCAAGAAGGGG  
TGACTTTCCCCCACTGGAAGTAAT

>2530

CCAGACCTCCTTCTGCTTCTCAGACTCTATTCCGACACCCTCCAACATGGAGGAAACG  
CAACAGAAATCCGTGAGTGGATTCCGTCTCCCTAGGCGGGGATGGGGGAGACCTGTGG  
TCAGGGCTCCCGGGCAGCACAGCC

>2531

TGACACCTCGGACAGCGATGACTATCACCTCCTAAAGGACCTAGAGGAAGGCATCCAA  
ACGCTGATGGGGGTGAGGGTGGCGCCAGGGGTCCGCAATCCTGGAACCCCACTGGCT  
TAGAGGGCTGGGGGAGAGAAACACT

>2532

GGGGACCTGTGCAACCCGAACGGCGTCGGGCCGTGGAAGCTGCGCTGCTTGGCGCAG  
ACCTTCGCCACCGGTGAGCGGGGGAACTGAGGCACGAGGGACAAGAGGTCGTCGG  
GGAGTGAAAGCAGGCGCAGGGAAATAA

>2533

TGCAGGAGGAGCCGGGGGCCTTCAACTGGAGCATGTACAGCCAACATGCCTGCCTCAT  
TGAGGGCAAGGGGTAAGGACTGGGGGGTGAGGGTTGGGAGGAGGCTTCCCATAGAGT  
GGCTGGTTGGGGCAACAGAGGCCTG

>2534

CGTGCCCTGGTCTGTGGTGTCCCGGCCATGGACATCCCCCAGACCAAGCAGGACCTG  
GAGCTCCCAAAGGTTTGAGGCTGGGGGAGCGGGCACTTTACTGTGGGAGGCCTGGGG  
CGGGTGGGAGCTGCGGGCAGGCGGG

>2535

CTCTGAGGGTCCACATCACCTCACTGTTGCCACCCCCGAGGACAACCTGGAGATCGT  
TCTGCACAGATGGTGGGTTTCTCATCATTGAGACGGGCTGGGCGGGGGCTCAGTCTCC  
CCCCTCAGGGGTCCAGGACTGGGT

>2536

AACAACAGCTGTGTTGAGAAGAAGGTCCTTGGAGAGAAGACTGAGAATCCAAAGAA  
GTTCAAGATCAACTGTGAGTGTCCCCAGGCCCAAGGGCTGGCTCAGTGCTGGCATGC  
TAGCCACGCTCTCCCAGAGGCGGCTC

>2537

GACAATTCCTGTTTCTCTGCCTACAGGACACCACCACCCCATCCAGAGCATGATGTG  
CCAGTACCTGGGTGGGTCTCACAGCATGAGCTCAACGTGGGTGAGAGGCAGCAGC  
TACGTCCATGGCTGGGAACCCTGG

>2538

GGATTCATCAGGGCTTTCAGGCCCCTGCCCAGGCACCTATGGTACTTGCTGGACTTGAA  
ACAGATGGAAGGTGAGCTCTGCCTAGGACACGCCAGCCTCAGCTGGAGGAGAAGCT  
GCCTCTTTCTTAGCCCGAGCCCC

>2539

CCACACCAGAGCAGATGGCCCAGTATGCAGCTGATCTCCGTAGATACATCAACATGCTG  
ACCAGGCCTAGGTGTGTGCCACAGTTGGGGAGAGAGATCCCAGCCCCTGGGACCCTG  
GGCCCACTCCACATTCCTGGCCAC

>2540

ATGGGAAAAGACACAAAGAGGACACGCTGGCCTTCTCGGAGTGGGGGTCCCCGCATG

CTGCTGTCCCCAGGTGAGTTTGA CTCCCTGCCCTGTCTGTCCAGGCTCCCTGGGGCTG  
AAATGGGGGTGGTGGGACTGAATCA

>2541

ATGTGGCAGCTCACAAGCCTCCTGCTGTTCGTGGCCACCTGGGGAATTTCCGGCACAC  
CAGCTCCTCTTGTAAGGCCACCCACCCCTACCCCGGGACCCTTGTGGCCTCTACAA  
GGCCCTGGTGGCATCTGCCCAGGC

>2542

GCGGGAGTGCATAGAGGAGATCTGTGACTTCGAGGAGGCCAAGGAAATTTTCCAAAAT  
GTGGATGACACAGTAAGGCCACCATGGGTCCAGAGGATGAGGCTCAGGGGCGAGCTG  
GTAACCAGCAGGGGCCCTCGAGGAGC

>2543

TGCATCGACGGCATCGGCAGCTTCAGCTGCGACTGCCGCAGCGGCTGGGAGGGCCGC  
TTCTGCCAGCGCGGTGAGGGGGAGAGGTGGATGCTGGCGGGCGGCGGGGCGGGGCT  
GGGGCCGGGTGGGGGGCGCGGCACCAAG

>2544

GGCTGGCGGCGCTGTAGCTGTGCGCCTGGCTACAAGCTGGGGGACGACCTCCTGCAG  
TGTCACCCCGCAGGTGAGAAGCCCCCAATACATCGCCCAGGAATCACGCTGGGTGCGG  
GGTGGGCAGGCCCTGACGGGCGCG

>2545

CCAAGAAGACCAAGTAGATCCGCGGCTCATTGATGGGAAGATGACCAGGCGGGGAGA  
CAGCCCCTGGCAGGTGGGAGGCGAGGCAGCACCGGCTCGTCACGTGCTGGGTCCGGG  
ATCACTGAGTCCATCCTGGCAGCTAT

>2546

ATCCACCCCTCCTGGGTGCTGACAGCGGCCCACTGCATGGATGAGTCCAAGAAGCTCC  
TTGTCAGGCTTGGTATGGGCTGGAGCCAGGCAGAAAGGGGGCTGCCAGAGGCCTGGGT  
AGGGGGACCAGGCAGGCTGTTCAGG

>2547

AGCAGCTTCTTGATCGTGGTGGTGTTCCTCATCGCTGGGACGCTGGTTCTAGAGGCAG  
CTGTCACGGGAGGTGAGTGAACAGGTGACCTGCTGGGCTGGGTGGACTAAGGGGAG  
ACCCTCTGGACACCCTGGGCCAGGA

>2548

ACTGACTGCCCAGGAATCAAGAAGTGCTGTGAAGGCTCTTGCGGGATGGCCTGTTTCG  
TTCCCCAGTGAGGTGAGCACTAGCTGGAGAACGAGGAGACCCCTGAAGACACAAAAG  
AAGGCTGAGCGGTGGGGAAGCATCC

>2549

GTTTTGCCATTGCCAGTGGGACGTCTGAGACTTTCTCCTTCAAGTACTTGGCAGATCAC  
TCTCTTAGCAGGTAGGTGCCGCAGACCCTGCGGGTTAAGAGGTGGGGTGGGGGGCAG  
TGCTTGCCAAGGCCCTAAACTGGG

>2550

ACCTGGGTTCGCTCGCCTTCCTAGGCGCTGACACCGCTCGGTTGGATGTCGCGTCGGA  
GTTTCGAAAGAAGTGAGTCCGGGCAGCGCCTTCCCCCTTGCTGGTACCTGGCAGGCAA  
GGGGAAGTACCGTTGGTCCCGAA

>2551

AGGCCGGGCCTGCCAGACCCTTATTCGGCCCCAGGACATGAAGGGTGCCTCTCGAAG



CCCCGAAGACAGGTAACCTACGCCCTGTGCTGTCCAGGGACGGGAGGGAAGGAAGGTG  
TGCGGGAGGAGTTCTCTGTCTCCAC

>2552

TTGCAGCCCAGAAGACCCACCAGGACCAGTACAGCTTCAGCACTGACACGGTGGAGT  
GCCGCTTCTACAGGTGAGAGCTGGGGCTAGGGGTGGGGGGCTGGAAAAGGCGCGGG  
AAACTCTGGGTGGTCTAAGAGCCCTGG

>2553

TGCAAGATGCTTCTGATTCTGCTGTCAGTGGCCCTGCTGGCCTTCAGCTCAGCTCAGGA  
TTTAAATGAAGGTAAGATGAATTGGGGGAAGATATTGTGACTCTGATTGGGGTTTACAG  
GCAAATGCTATAGAGGAGGAAA

>2554

TCCCCAAGGGGGCCGCCACAAGGACCTCCACAGGGGCAGTCTCCTCAGTAATCTAG  
GATTCAATGACAGGTACGATTCCAGTTTATTATCCATCAAAGGCTCCAAGTCTACAGT  
TCTCCAACCTCATTGTGCCAATGA

>2555

TGCAAGATGCTTCTGATTCTGCTGTCAGTGGCCCTGCTGGCCTTCAGCTCAGCTCAGG  
ACTTAGATGAAGGTAAGCCGAATTGGGGGAAGATATTGTGACTCTGATTGGGGTTTACG  
GGCGAATGCTATAGAGGGGGAAA

>2556

TCCCCAAGGGGGCCGCCACAAGGACCTCCACAGGGGCAGTCTCCTCAGTAATCTAG  
GATTCAATGACAGGTATGATTCCAGTTTATTATCCATCAAAGGCTCCAAGTCTACAGTT  
CTCCAACCTCATTGTGCCAGTGA

>2557

GCCGCGAGCGTGACCGGGTGCAGGTGGAGCGCGACGGGCTGGCGGAGGACCTGGCG  
GCGCTCAAGCAGAGGTCAGGGGGCAGGGCTGGGCCGCTGCCGTCGAGGCGAGGTCG  
AAGCGGCGTCGAGGCGGCTGCTCTTGCC

>2558

CCTGGAAGTAGAGCGCAAGATTGAGTCTCTGATGGATGAGATTGAGTTCCTCAAGAAG  
CTGCACGAGGAGGTAAGTGGGCCCCGGTATCAGGGGCGGTTTCTGAGGTTGTGGGGTG  
GTCTCGCTGGAGCTGGCGGGTGGAG

>2559

CATCCGCGCGCAGTACGAGAGCATCGCCGCGAAGAACCTGCAGGAGGCGGAGGAGTG  
GTACAAGTCCAAGGTGCAAGAGCCGGGAGGGCCTGCGAGGCGGGACGCTGGGGTGG  
TGTCGCGCGTCCCAGCCGACTAAAGCC

>2560

GCAGGAGATGAACGAGTCCCGACGCCAGATCCAGAGTCTAACGTGCGAGGTGGACGG  
GCTGCGCGGCACGGTGAGTACGAAGCTGCGCGCTCGGGCCCCGGGAGCGGACGATGA  
AATGTTCTGCAACTGGCCCCCTCCAC

>2561

TCAACGTCAAGATGGCCCTGGACATCGAGATCGCCACCTACCGCAAGCTGCTGGAGGG  
CGAGGAGAGCCGGTGAGGGTGGAGCTGCTGGGGCGGGGCAGGGCGGGGTCGGGACT  
GGGCCGGGCAGGGCGGGGCCTGGGCA

>2562

GGAGCCTCCCCAGGACAGCCACAGCCGGAAGACGGTTCTGATCAAGACCATTGAGAC

CCGGAATGGGGAGGTGAGGCAGGTCCCCTAATGCCAGGACCCCACCATTTCCCATATTA  
TTTCTGAGCCCCAGCCTGGCTGTC

>2563

TATTACCGCCAGAGACAAAGAAGTCGCAGACGAAGGAGGCGGAGCTGCCAGACACG  
GAGGAGAGCCATGAGTAAGTGGGCCCAGCTGAGGGTGGGCTGGGGCTGAGGCTGGG  
AGCTCTCAGGGCCCAGCCTTCCTCTCAC

>2564

GCAGGGCAGTCTGCGGCGGTGTTCTGGTGCACCCCCAGTGGGTCTCACAGCTGCCC  
ACTGCATCAGGAAGTGAGTAGGGGCCTGGGGTCTGGGGAGCAGGTGTCTGTGTCCCA  
GAGGAATAACAGCTGGGCATTTTCCC

>2565

CCCACCCAGGAGCCAGCACTGGGGACCACCTGCTACGCCTCAGGCTGGGGCAGCATT  
GAACCAGAGGAGTGTACGCCTGGGCCAGATGGTGCAGCCGGGAGCCCAGATGCCTGG  
GTCTGAGGGAGGAGGGGACAGGACTC

>2566

TCACCCTCAGAAGGTGACCAAGTTCATGCTGTGTGCTGGACGCTGGACAGGGGGCAA  
AAGCACCTGCTCGGTGAGTCATCCCTACTCCCAAGATCTTGAGGGGAAAGGTGAGTGG  
GGACCTTAATTCTGGGCTGGGGTCT

>2567

ACTCCTGGATCCCACGGCCTGCCAGGCAGGCACGGGAGAGATGGTCTCAAAGGAGAC  
CTGGGCCCTCCAGGTACTGTGCTGCAGACCCCCACCCTCAGCTGAGGACACAGACCCCT  
TTTCAGGAGGCCCATCTGTCCAGGC

>2568

CTGCCTGGAGCCCCTGGTATCCCTGGAGAGTGTGGAGAGAAGGGGGAGCCTGGCGAG  
AGGGGCCCTCCAGGTGAGCAGGGTGGGGCAGGTGGGCAGTGGAACATGGGCACAG  
CGACCCTGAAGTCAGTTACACGGGGAT

>2569

GCTCATCTAGATGAGGAGCTCCAAGCCACACTCCACGACTTTAGACATCAAATCCTGC  
AGACAAGGGGAGGTAAGGGGACCCCCTGGGCTCACGGGGTAGGAGTTTCCCACAAAT  
TCCCCTCATTCTCAGCACCAGCTTC

>2570

GCCCTGCCCCGCCGCTGCGATGCTCGCCCGCGCCCTGCTGCTGTGCGCGGTCTGGCGC  
TCAGCCATACAGGTGAGTACCTGGCGCCGCGCACCGGGGACTCCGGTTCCACGCACCC  
GGGCAGAGTTTCCGCTCTGACCTC

>2571

AGTGTGGGATTTGACCAGTATAAGTGCGATTGTACCCGGACAGGATTCTATGGAGAAA  
ACTGCTCAACACGTAAGTTTGTCTTTGGTTGCCTCATTAGGAGTGGGGCTGGATACAG  
TTATCATTGTATAGATTTGTGTC

>2572

AAGGGATTTTGGAACGTTGTGAATAACATTCCCTTCCTTCGAAATGCAATTATGAGTTAT  
GTGTTGACATGTAAGTACAAGTGTCTTTCTAAGGTTTTTAGCCTTCTCAAAGAAAAATA  
TGCTTTATAATACTGTAAGCC

>2573

AACCTCTCCTATTATACTAGAGCCCTTCCTCCTGTGCCTGATGATTGCCCCACTCCCTTG

GGTGTCAAAGGTGAGTAAGAAGAATCCATTAGAGATGTATTAAGACGGGCTG  
CATTGCTGCCAAAAAAAAAAAT

>2574

CTTCACGCATCAGTTTTTTCAAGACAGATCATAAGCGAGGGCCAGCTTTCACCAACGGG  
CTGGGCCATGGGGTAAGATAGAGTTAATATCTTAGAGTTAGTAAAATTATACCAAATCAT  
AGTCAAGGGCTAACATTAAAGG

>2575

TATTTACGGTGAAACTCTGGCTAGACAGCGTAAACTGCGCCTTTTCAAGGATGGAAAA  
ATGAAATATCAGGTATGCTTCCTTTGACTATTAAGACTTAGTTATTACCGCTTATACCCAT  
ATTTTAAAATCCCTAAAAATG

>2576

GTGCTTAAACAGGAGCATCCTGAATGGGGTGATGAGCAGTTGTTCCAGACAAGCAGGC  
TAATACTGATAGGTAAACAAGAAAATGATTTATATAAAACCCTCTTCCCCAGGGAAAAT  
TAGTGTGCTATCTTTGTTATGTT

>2577

CAACTCTATATTGCTGGAACATGGAATTACCCAGTTTGTGTAATCATTCACCAGGCAAA  
TTGCTGGCAGGGTAAGCATTATTATTGAAAACCAAAACAAAAGACTAGTCAGTAACTTT  
AGAATTTCTGCCACGGAAATTA

>2578

TACCAGTCTTTTAATGAGTACCGCAAACGCTTTATGCTGAAGCCCTATGAATCATTTGAA  
GAACTTACAGGTAAAGAAACAGTTTCTAAACTTCTTCGTTTTTTGTTTGTTTGTTTGTTT  
TGTTGTTTTTGGTTTTCTTT

>2579

AGGCGATTATGCAGCCCCCTTGATCATAAGAATCTGGATATGGATGTGCCATACTTTGCAG  
ATGTGGTGAGGTGGGTGGCACTGTATCTTGCCTTATGTGGATTGTAAAACAAGAATTGA  
TTTGAATACTTTGATTGTTGT

>2580

AGACGATCTGCACTTCGCATTTTGGCATTGACATTTAATTTTAGGGTCCTTTATATAGAA  
GGGAGAGTAGGTAAACTGATTTTTTTTTTTAACAGGGAGGGTTTGACAATCTTTGGCAG  
ACTTGGAGCAAAAGATTGAGG

>2581

GTTGGAGAAATTCACAGTACATCATCCAAAAGAGGAGTCCATGATGGAGGCAGAGGT  
AAACTTGAGAGGTAAGAAACCCTGAAGACAGGGGAGTGCTTTGTGGCAGGCTCTGC  
ATATAAGAATTCAGCCTGGCCAACA

>2582

GCGCATGCTCTGGGGCAGTTCGCGGCCCGGCGGGGAGCGCCGGAGTTCCTTGTGGCC  
GACGTGCACCAAGGTAGGTCTCGCCTGGGACGCGCGGAGGGTCCGGGCAGAGGGCG  
GTAACGAGCGGGCCACAGCGGAGCACG

>2583

TCACCCAAGCGCATAGCTAAAAGAAGGTCCCCCCCAGCAGATGCCATCCCCAAAAGCA  
AGAAGGTGAAGGGTAAGTTGGCCTTGGCCTCTTTGTGGGTACAGGTGGCCCCCTTGAAA  
CCCTAAGAACCCGGACTGGGCTCC

>2584

CATTCGGAGGATGTTGTGTCAGGCTGAGGCTGGGGGCATGCACACCGTGTGTCTAAGC

AAAAGTGGCCAGGTAGGTGTTGGGGACTGGCACAGGGTTGGACAAGGCCTGGGGTTG  
GGTGGCTTGGGGCAGGGCTTTTGAA

>2585

GTCAGCAGGAGACAGTCACACAGCAGCCCTCACCGATGATGGCCGTGTCTTCCTCTGG  
GGCTCCTTCCGGGTAAAGGCTGGGTCTGAAAGTCTGCATGGTCCCGTGAAAGACAGAAT  
TAATTGCGGGGCCCCAAAGATAAT

>2586

GAGCCCATGAAGAAGAGCATGGTGCCTGTGCAGGTGCAGCTGGATGTGCCTGTGGTAA  
AGGTGGCCTCAGGTGGGTCTGGGGGCACTTGCTCAGGGCAGGAGTTGGAGGACCTTG  
TTCTGGGGCTGGCCTAGCCTTGGGC

>2587

TGCGGGGAACAGGGCCAGCTAGGCCGTGTGCCTGAGTTATTTGCCAACCGTGGTGGCC  
GGCAAGGCCTCGGTAAGTGGCCTTGGTACCTCCAGCAGGGCAAATTGGCAGGCCACC  
CCCACAGTGAAGGCCAAACGGAGGA

>2588

TATTTACCTTTGCCATCTCCCATGAGGGCCACGTGTACGGCTTCGGCCTCTCCAACTA  
CCATCAGCTTGGTGAGCCCCGAGCCCAGCTTCAGGCATGACCCAGTGGCCTGCGTTCC  
TGTCCTGGCTCTGCACTCATTCA

>2589

AAGAATTCCACCAAGTCCTGGGTGGGCTTCTCTGGTGGCCAGCACCATACAGTCTGCA  
TGGAATCGGAAGGTAGGGCCTTTACGTCCTTCTCTAGTTTGGGGGTGGAGTGTTCCCTG  
GCCTAGGCCTAGCCAGATTCCTG

>2590

ATCTCCAGGCTGCCTGCTGTCTCCTCGGTGGCTTGTGGGGCCTCTGTGGGGTATGCTGT  
GACCAAGGATGGTGAGTGGGGCTGCCTACACTCTGTCTAGTTGGGACCTGGGGGTCAT  
GGTTCTTACCCAATTCCCAATA

>2591

CCGCGGTGCCATGGCCCCCGCCCGTCTGTTTCGCGCTGCTGCTGTTCTTCGTAGGCGGA  
GTCGCCGAGTCGGTGGGTGCTTGGAGGTTCCCGGGCTGGGGGCGAAGCGGGGGCGCA  
GGCCGGTGCCCTCCTTTGTTTCGTGG

>2592

GACGATGAGGATGTAGTGGGGCCCCGGGCAGGAATCTGATGACTTTGAGCTGTCTGGCT  
CTGGAGATCTGGGTACGGAAGGTGTGCTGGGCAGGCGTAGGCACAAAGCTGGAGGGA  
GTGGTGGCTTACCAGCCAGGAGGG

>2593

TCCAACAAGGTGTCAATGTCCAGCACTGTGCAGGGCAGCAACATCTTTGAGAGAACG  
GAGGTCCTGGCAGGTAAGTCCCATGCTGCTTATAAGATGCCTTGAAGGTGGAATGGGG  
CTCAGCGGGGGAGAGCACCTGCAGG

>2594

AGGCACCAATGCCTATCGCTCCTACTGCTACTACTTTAATGAAGACCGCGAGACCTGGG  
TTGATGCAGATGTGAGTGAGGAGAGCAGTGTGGGAAGGGAGACTCATGAAGGGAGGG  
GAAGCTGCCACTCTCCAGTGTGTT

>2595

GGCCTCACTGATTAAGGAGAGTGCGCACTGATGACTTCAATGTCTGGATTGCCCTCCATG

ACCCCAAAAAGGTAGGCTGCAGCCTTCTTTATCTCCTAATGATCAGGTTTGAGAAGTAA  
GAAGGAGGTTCAAGTTCTGGTC

>2596

AAGTCCTGGGGCATTGGAGCCCCAAGCAGTGTTAATCCTGGCTACTGTGTGAGCCTGA  
CCTCAAGCACAGGTGAGAGGCAGAGAATCCATCCACCTGTTTCTGTTCTCTCCTGCTTA  
GCTCCAGGGATGGAAGTGGGACT

>2597

CTAAGCATGGCTCAGACCAACTCGTTCTTCATGCTGATCTCCTCCCTGATGTTCTGTCT  
CTGAGCCAAGGTGAGATTTTCCCCCACACTTCCCACAACCCCAACTCTGAATTCTTCCC  
TCCATCCTCATGTATAAGGTT

>2598

AGGCACCAATGCCTATCGCTCCTACTGCTACTACTTTAATGAAGACCCTGAGACCTGGG  
TTGATGCAGATGTGAGTGAGGAGAGCAGCAGGGGAAGGGAGGCTTATGAAGGTAGAG  
GCAGCTGCTAATTTGCAGTGTT

>2599

GGCCTCACTGATTAAGGAGAGTAGCACTGATGACAGCAATGTCTGGATTGGCCTCCAT  
GACCCAAAAAAGGTCAGTCTGCAGCCACCTCTATCTCCTTATAAACATTTTTGAGAGGT  
AAGAGGGACGTTTAAGGTCTGGC

>2600

AAGTCCTGGGACACTGGATCCCCGAGCAGTGCTAATGCTGGCTACTGTGCAAGCCTGA  
CTTCATGCTCAGGTGAGAGGCAGACAATCTATCCACCTGTTGCCATTTCTTCCCCTT  
ATCTCTGGGGATGAACATGGGGA

>2601

CGCCGCCGCCGCCCTCCTGAGGAGGACCCAGAGCAGGACAGCGGCCCGGAGGAC  
CTGCCTCTCGTCAGGTGAGCGAGCAGAGCCGCCGTCGCCTCACGCGGGAAGGGCGCC  
CCGGGTGTGCGTAGGGCGGGCGCAAGG

>2602

GATACCAGATCATGTCAGAGAGAGAGCTTGGTTAACTTGGGAGAAAGTTTCATCTGTG  
GATGGAGTATTGGTAAGGATTTTCTTAAAACGTTTTGAAATTTTTTTTCTCATTTTAAA  
AACAACTTCAAATCACTATACA

>2603

TTATTGCAGCAGTTGACCTAGATGAGATGTCGTTCACTTTTACTGAGCTACAGAAAAAC  
ATAGAAATCAGGTAAAGTTTCTTGATAAATATAAGCCTCTGCCATAAAAGGAAATGAA  
TTCTGGATTTTCTCTCAATAG

>2604

TTGATAATGCTATGTCAAGACTGTTGAAGAAGTATGATGTATTGTTTGCACTCTTCAGCA  
AATTGGAAAGGTAAAGTAAACATTTTATTAGGGTTACACTCTGATTTTTTATGTCATTGT  
TCACAATTAGATTCTGGGAA

>2605

CAGTTAATGCTATGTGTCCTTGACTATTTTATTAAACTCTCACCTCCCATGTTGCTCAAA  
GAACCATATAGTAAGTATTTAATTTATGCCCTTTTACTTTCTCATTCAGCAGTTGCTTAT  
TGAATGTCTAGTGGGTACC

>2606

AAAACAAC TAGAAAATGATACAAGAATTATTGAAGTTCTCTGTAAAGAACATGAATGTA

ATATAGATGAGGTAATTTAACTTCATGATTTCTTTAAAACAGTTAAAGTAGATTTAGATGT  
AAGTTCTCCCTAACAAATATT

>2607

TGTTTATTTCAAAAATTTTATACCTTTTATGAATTCTCTTGGACTTGTAACATCTAATGGA  
CTTCCAGAGGTAATCTGAAAGGAAATTTAATAAAATATTAATGTTTTGAGACTGTGGAG  
GGAGGATAATTGTCTAACTT

>2608

AAAATAAAGATCTAGATGCAAGATTATTTTTGGATCATGATAAACTCTTCAGACTGATT  
CTATAGACAGGTATTGCACATGGTATATTTGATTGATTTGCTTTAGATATAGGTTGATACT  
GATATAGGTAGATTATATA

>2609

CACAGAGAACACCACGAAAAAGTAACCTTGATGAAGAGGTGAATGTAATTCCTCCAC  
ACACTCCAGTTAGGTATGAATTTTCCTACTTTTAATTATATTATAATTTTGTTATTCATGGC  
TTTATAGTGTTTCAGATTTGT

>2610

CCAACAATTAATGATGATTTTAAATTCAGCAAGTGATCAACCTTCAGAAAATCTGATTT  
CCTATTTTAAACGTAAGCCATATATGAAACATTATTTATTGTAATATCTTGGCAAAGAACT  
TGAAATTAAAAGTTAAAGTA

>2611

TATAGGATACATCTTTAAAGAGAAATTTGCTAAAGCTGTGGGACAGGGTTGTGTGCGAAA  
TTGGATCACAGGTAACCTGAATTCATTGTAATTCGTGGTACTATAGAGTAATAATATTAA  
AAGCAGCATCTTCCAGTTCG

>2612

CTGAATGACAACATTTTTTCATATGTCTTTATTGGCGTGCGCTCTTGAGGTTGTAATGGCC  
ACATATAGCAGTAAGTTAAATTTTCATAAATAAACACTTTTGTTCAATTTAAAGTTAAAA  
TGTGGTGTGTTTCTTTGGTC

>2613

GACAAGAGAAATGATAAAACATTTAGAACGATGTGAACATCGAATCATGGAATCCCTT  
GCATGGCTCTCAGTAAGTAGCTAAATAATTGAAGAAATTCATTCATGTGCATATGGCTAA  
CAAATTATTGTTAGTGAGAGGT

>2614

CAACTGATCACCTTGAATCTGCTTGTCTCTTAATCTTCCTCTCCAGAATAATCACACTG  
CAGCAGATATGTAAGCAAAATATATGTTATGTTGACCATTCAAACTGCAAATAGATTTTA  
AGCATAAGTGCAATGTAACA

>2615

CAAGCAACCTCAGCCTTCCAGACCCAGAAGCCATTGAAATCTACCTCTCTTTCACTGTT  
TTATAAAAAAGGTTAGTAGATGATTATTTTCAAGAGCATGGACTCTGAAACTAGGCTGA  
CTGGGTTCAAATCATGTTTCTT

>2616

CATCTGGACCCTTTTCCAGCACACCCTGCAGAATGAGTATGAACTCATGAGAGACAGG  
CATTTGGACCAAGTAAGAAAATCAAGCACTTCACCTTCTCTCCTCCCTACTTACTTGTT  
AACTGATTCTTTCTTTCTTTCT

>2617

GAAGAATATAGACCTTAAATTCAAAATCATTGTAACAGCATACAAGGATCTTCCTCATG

CTGTTTCAGGAGGTAGGTAATTTTCCATAGTAAGTTTTTTTGATAAATCCATATCCATAACA  
TAACATAGGTAATTCATTTG

>2618

TATAGTATTCTATAACTCGGTCTTCATGCAGAGACTGAAAACAAATATTTTGCAGTATGC  
TTCCACCAGGGTAGGTCAAAAGTATCCTTTGATTGGAAAAATCTAATGTAATGGGTCCA  
CCAAAACATTAAATAAATAAT

>2619

CACCCCTGAAGAGTCCATATAAAATTTTCAGAAGGTCTGCCAACACCAACAAAAATGAC  
TCCAAGATCAAGGTGTGTGTTTTCTCTTTAGGGAAGTAGTAAAGAATGAGAGGGGGAT  
TATTTTGATCCAAGAATAAAAAAT

>2620

GAAGCAACCCTCCTAAACCACTGAAAAAACTACGCTTTGATATTGAAGGATCAGATGA  
AGCAGATGGAAGGTAGGAACCAGTTTTGAATGTTTTCCAGTAGCTGAGATGGTCATCT  
GGGGAATCCAGAGTCTCAGCACTG

>2621

CGGTTAATGAAAAAATGGACACAGAAAGTAATAGGAGAGCAAATCTTGCTCTCCCACA  
GGAGCCTTCCAGGTAGGTACAAGGTATTATTTTTTTCTACCCTCAGTCACTTGTGGCAG  
GGGAAGTCATAGTCACGGTGCTT

>2622

GAAGTCGGCCTCATCCCCACCACTGCATACATGGCTGACAGTTTTGAAAAAAGAGCAG  
GAGTTCCTGGGGGTGAGTGAGCCTCCTCCAACCTTTGACTAGAGTAAGGGTTGGGTCTA  
GAAAAGAATATTGAGTTGCATCAA

>2623

TATTTACACATTGAGGGAGACATTTTTTTCATCATTTAAAGCAGGTTATCCATTCTGGGG  
AGCCATATTTGTGAGTATATATCTATAATTGTTTCTGAAATAACACTGAACATAGGTTTTT  
CTCTTTCTCAGATCTAACC

>2624

GGCCTATATCCACATCCACAGTTGCCAGAAATTTTTTGAGACCAAGTGCTTTATGGCTT  
CCTTTTCCACTGTATGTATTTTTTTTTGTGTGGGAAGACTAAGATTCTGGGTCCTAATGT  
AAGTAAGAAGCCCTCTTCTCC

>2625

CATTCTGGGACTTGGTAGTGCTGTGTCACTCACAATCTGTGGAGCTGGGGAAGAAGCTC  
AAAGGAAACAAGGTAGATAGAAGCCCGATATAAAATCTTGAATGACAGGTTAACGAAT  
TGGAGCTTTATTCCTTAAAATATG

>2626

ACAAGGATTGGTTTGGGGTCCAGTGGGTCAGCAGCCGTTACCTGGATCCCGGTGACCG  
GGATGTGGCTGAGTGAGTGATTTGCGTCTCCCTTCCTCCTCCTCCTCCTCCCTGGACAG  
GCTCCCTCCTGCTGCCTTGAATC

>2627

GCTGCTGGAGCACTTGCAGGACTTGGCAGGCACACTGGGTAGCATGCTGGCTGTCACC  
TTCTACTGCAGGTGAGTCAGCAAAGCATCTGACACCTCCTCCCACCCGGGACTCCTC  
CCTGCCTCCAACCCTGGGCCTCTT

>2628

ACACGAACAAGCGCGTGTGCGAGGAGATCGCCATTATCCCCAGCAAAAAGCTCCGCA

ACAAGATAGCAGGGTGAGTCGGGCCTTCCTCGGCCTCCGGGCGTCCGCGATCTGTTTG  
TGTGCTCTGCCGCCCTCCGACTCGG

>2629

CCCAGTAAGAGGTATCTCCATCAAGCTGCAGGAGGAGGAGAGAGAAAGGAGAGACAA  
TTATGTTCTGAGGTAACTTTCTGGATATTGGGCTTCTGGCTAATCCTCAAATGATAA  
AGCTATGGGTTCTTGGCTTCCAA

>2630

ACTTCGTACTTTCTATGAGAAGCGTATGGCCACAGAAGTTGCTGCTGACGCTCTGGGTG  
AAGAATGGAAGGTAAAAGTTGACAAATTGTTGCAGGTATTTAAGTCAGAGACGGTAAA  
CGCCATTGGTAACTGGTATTTGG

>2631

AGAAAATCAGTTCGTGGTTGCATTGTGGATGCAAATCTGAGCGTTCTCAACTTGGTTAT  
TGTAAGGAGGTGAGGGTACTTGTGTTCAATTTTCGTTGAAATTGATTTAAAGCCAG  
TTGTCCAAATGCTTATTCATT

>2632

AAACTTTTCAATCTCTCTAAAGAAGATGATGTCCGCCAGTATGTTGTAAGAAAGCCCTT  
AAATAAAGAAGGTAGGAGGGATTATGCAATTAGGGCTTGCTTAATTTTGGTAATTTGTCT  
ATCATTTTGTGTGCATATCAG

>2633

GAAGCAGCGTACCAAGAAAAATAAAGAAGAGGCTGCAGAATATGCTAAACTTTTGGC  
CAAGAGAATGAAGGTTAGTCTAAGATGATTTGAGGGGTGGGAGGAGTTCGACCTGG  
CTTTGGATTTGCGTCTTTAACCCAGA

>2634

ACTACTTTGATACGACACCGCATGGCTTCGAGACTCACACGCTGGAGGAGCACAACCT  
GGCCAATTACATGTGAGCAGACACACTGGCCAGTCAGGAGGGTGGGGGGCATGGCTG  
CCAATAGCCAGCAGTGGGGTACTTA

>2635

GTTTTCTGCTCCTTGGTCCTGGGTGTCAGCAGCCGAAGCTTCTTTTCGTTCCCTTGGCGA  
GGCTTTTGATGGTAAGGCTTCAGAAGGTTTGCAGGATTTCTAAGAGAAACATCGCCCT  
GGACCTATAAACTGGGGAAAATG

>2636

TCCATGCTCGGGGGAAGTATGATGCTGCCAAAAGGGGACCTGGGGGTGCCTGGGCTGC  
AGAAGTGATCAGGTAAGTGAAGCTCCTGGGACGTTAGGGCTGGGTGAGCAGAGCTTGC  
CTGCCTTGGACAGTCAGGAGGGAGA

>2637

AGCCGGCTTCGCCGGGGATGACGCCCCCTAGGGCCGTGTTCCCGTCCATCGTGGGCCGC  
CCCCGACACCAGGTCAGGCTGCCCCCTCCGCAGAGGGAGCCGGCTCGGGGTCCCCGCG  
TAAGCCAGCCTGGTGCCACCCGGAG

>2638

TTCAACGTGCCCCGCCATGTACGTGGCCATCCAGGCCGTGCTGTCCCTCTACGCCTCCGG  
AAGGACCACCGGTGAGTGCCCGCTGGCCCCCAGTCCCCTCGTCCCGCCCCCGCCCCG  
CCCCCGCCCCCGGCCGCTAGCGC

>2639

GCGGGCCGCGATCTCACCGACTACCTGATGAAGATCCTCACTGAGCGTGGCTACTCCT



TCGTGACCACAGGTGCGCGGCGCCCTGCACCCGGGCGGAGGGCCGCGGCGGCCTGA  
GTGAGGGCTCCTCTCCTGCTTCTGC

>2640

GGGCAGGTCATCACCATCGGCAACGAGCGCTTCCGCTGCCCCGAGACGCTCTTCCAGC  
CCTCCTTCATCGGTGAGCCCCGCTCGCCCTCGCCCCGGCCCCCAGGCCCGCGCCCCC  
GGCCCGAGCTTCTGCTCACGCTCC

>2641

GTACCCTGGGATCGCTGACCGCATGCAGAAAGAGATACCGCGCTGGCACCCAGCACC  
ATGAAGATCAAGGTGGGTGGTGGCCTGCGCGGGCTGTCGGCGGGGTGGGCTCCAGGG  
TGAGGTCTCCCCACCTCACGCGCTG

>2642

AGGAATATGAACAAGCCGCTGCTTTGGATCTCTGTCCTCACCAGCCTCCTGGAAGCCTT  
TGCTCACACAGGTAAGGAGGTGAAGGAATGGTCAAGAATCATAAAGTGAGAAAATAG  
GTTGAAGCTGAGATATCTTTTCCC

>2643

CCCAACATCATCTTTGTACTTTCCCTGCTCCTCATCTTGGAGAAGCAAGCAGCTGTGAT  
GGGACAAAAAGGTGAGTGGAGAGGGTAAGCCTTGGGGAAAGCTGCTCAGACAGCTA  
ATAATCTAAGATTATTTGGGGTGCA

>2644

ACGACCGAAACCCATTATTTACATAAACCTACCATTTCGGTAACCATGTGAAAGGATGGA  
CCAATATCAAGGTAATTTTTTTTTTAGCAAATAGGGGAGATATCTCTCTATTGTTTAGAA  
TTGTTGGGGACTCTCCAGGAC

>2645

TCCATCATCCTCTTTGTCCTTTCCCTGCTCCTTATCTTGGAGAAGCAAGCAGCTGTGATG  
GGACAAAAAGGTGAGTGGAGAGGGTAAGCCTTGGGGAAAGCTACTTTAAAAAATGG  
CCTCTAAGGATATTCAGGGTGCA

>2646

AAGACAGAAATCCAATATCTACATAGCCCTGTTGCTTAGCAACCACTTGAAAAGCTGG  
ACCAATAGCAAGGTAAGTTTGCTTTTCTTACCAAATAGGAGAGGTGCCTGTCCCAAAG  
TTGGGGACTCTCCAGGAACATGGT

>2647

ACTCCTGGATCCCACGGCCTGCCAGGCAGGGACGGGAGAGATGGTGTCAAAGGAGAC  
CCTGGCCCTCCAGGTACTGTGCTGCAGACCCACCCCTCAGCTGAGGGACACAGACCCC  
TTTTCAGGAGGCCCATCTGTCCAGG

>2648

CTGCCTGGAGCCCCTGGTGTCCCTGGAGAGCGTGGAGAGAAGGGGGAGGCTGGCGA  
GAGAGGCCCTCCAGGTGAGCAGGGCGGGCAGGTGGGCAGTGGAACATGGGCACAG  
CGACCTGAAGTCAGTTACACAGGGGTGA

>2649

GCTCATCTAGATGAGGAGCTCCAAGCCACACTCCACGACTTCAGACATCAAATCCTGC  
AGACAAGGGGAGGTAAGGGGACCCCTGGGCCTCACGGGGTAGGAGTTTCCCACAAA  
TTCCCCTCATTCTCAGCACACCTT

>2650

GTGTGGCCCTGATGTGGGCCGCCAGACCGTGGGCGCTTGGGCTTCCAGGTCTGGCTG

AAGAATGGCGTGGTGAGTGGCACCCCTGGGCTAGGGCGCTGGGGGGCTGGGTGTGCCA  
CCCTGTGAGTCCTGGGCCAATCCCT

>2651

TTCTGAAGGCGGCTGAGGACTATGGGGTCATCAAGACTGACATGTTCCAGACTGTTG  
ACCTCTTTGAAGGTAGAGAGGAAGAGGCTGGGGGAGGAGGTGGGCAGGAGGACAGG  
GTGCTGGGACAGGGAGAGGGAATGAC

>2652

TGGCTTTGGGCAGCTTGGCAGTGACCAAGAATGATGGGCACTACCGTGAGATCCCAA  
CTGGTTTATGAAGTATGTGGCCCCCAGGGAGCTTGGGTCTCCGCATGGGGTGGGAGGT  
GGCTTGTTCTAAGGAGCTTGCGGG

>2653

CTTTGGGTGGGGGAACCTCACCTGCCCAATCTGCAAAGGTCTATTCACCGCCATCAAC  
CTCGGGCTGAAGGTGAGCACTGAAGGGGCTGCAGTGGAGGAGGCCGAAAGGAGTGC  
TGGGGCTGGGGGCTGGGGCTGATGCT

>2654

GCTGGCTCTATGAAGCGATGGCCAAGGCTTGGGAGCCCTGGCTGCCTGCCGAAGCCCT  
GCGCACCCCTCAGGTACTTATCGTCCGTGGAAACCCAGGAAGGGAAAAGAAAGGTGAA  
TGAAAGTGAAGGGAGAAGGGAACCT

>2655

CACGGATCCCGCAGGACAGCTCCAGTGGCTGGTGGGGGAGCTTCAGGCTGCTGAGGA  
TCGAGGAGACAAAGTGAGGGCCAGTAGTGGGAACACGGTGGTGCTGGGGGACAAGC  
AGGCTCCTGTTGAGCTGGAGCACCTCT

>2656

TAATTGGCCACATTCCCCCAGGGCACTGTCTGAAGAGCTGGAGCTGGAATTATTACCGA  
ATTGTAGCCAGGTAGGACGGAGATGAGGGTGGGAATAGGGACAGGGTGAGTGTCTGA  
AGGCTGAAAATTCCCTTGAGCATC

>2657

ACTCTGAGCCGGCCGCTGGCTGTAGCCTTCCTGGCACCCAGTGCAACTACCTACATCG  
GCCTTAATCCTGGTGAGTGAGGCAGAAGGGAGCCTCCCTTATCCTGGAGTTGGTGGGA  
TAGGGGAAGGAGGTTGGAGCCAGA

>2658

CCACTTCCTCGATGAAGGTTTTACTGCCAAGGACATTCTGGACCAGAAAATTAATGAA  
GTTTCTTCTTCTGTAAGTATATGAGGCCCATGCTGGCAGTGCAGCTGAGAGTGCCAGGC  
AAGTGGAACCTTTGGCAAGGTC

>2659

ATGTAATGATAGCAAAGCCATCGTGAAGACCCTTGCTGCTACCGGGACAGGATTTGACT  
GTGCTAGCAAGGTAAGCGATAGCAGCAGGCCTCAAAGCGTTGTATAAAATGGGCCTG  
GTATTCCCCACGAGGCAGATACA

>2660

GAGTCCAGATGATGACTTTTGATAGTGAAGTTGAGTTGATGAAAGTTGCCAGAGCACA  
TCCCAAAGCAAAGTGAGTTATTCCCCCATCTGAGGGCAAGATCGGGAGCATAAGATAT  
GTGGATTCTTATCAAACAACTTA

>2661

CCACGCTCAGAACCAGCAGGCTCCTTTTGGAACGGGCGAAAGAGCTAAATATCGATGT

TGTTGGTGTCAAGTGAGATTTTGGTGGGATAGCTAGAGGTCAAGACATTGAACAGTTT  
GAGTTTTACAGGCTTTCTCCTAGT

>2662

AAGCGGCTGTACCGATCCTGAGACCTTCGTGCAGGCAATCTCTGATGCCCCGCTGTGTTT  
TTGACATGGGGGTGAGTATACGTGACCCTGTTAGGGAAGGGCGGGACACAACCTGACAA  
TAACTAGTCTTAATTCTAGAGTT

>2663

CAGCATGTATCTGCTTGATATTGGCGGTGGCTTTCCCTGGATCTGAGGATGTGAAACTTA  
AATTTGAAGAGGTAATTTAGAACAAAACCTGTAATACTCAGTAGCCGTTCTAATAAATTC  
CTTTTTGGAATATTTCAAAATT

>2664

TCAGCTTTCACGCTTGCAGTTAATATCATTGCCAAGAAAATTGTATTAAAGGAACAGAC  
GGGCTCTGATGGTATGTATAAAGGACGAATCACTTCATGTATAACTGAAAGCTGATGCA  
AAAAGTCATTAAGATTGTTGAT

>2665

TGATGGCGTCTATGGATCATTTAATTGCATACTCTATGACCACGCACATGTAAAGCCCCT  
TCTGCAAAAGGTAATTTCTGAGCATACTGTATAAAACAATTAAGAGGACTGGTCACAAC  
ACGTGTAATTAAGTAGTACTT

>2666

TTGCTGCTGCCTCTACGTTCAATGGCTTCCAGAGGCCGACGATCTACTATGTGATGTCA  
GGGCTGCGTGGTAAGTAAGCCATGCATGTTGATGGTGCTGCCAAGAATAGGCACCTT  
CTTGGATGTGTGCTTCTTGTCTA

>2667

GCCATGGCTGAGTCACACCTGCTGCAGTGGCTGCTGCTGCTGCTGCCCACGCTCTGTG  
GCCCAGGCACTGGTGAGTCTCCCCAGCCTCCCCTCTCCTAGGCAGCTCCACCACTCA  
CTGAGCACTGCTTTGTGCTAGGCA

>2668

CCTGGAGCAAGCATTGCAGTGCAGAGCCCTAGGGCATTGCCTACAGGAAGTCTGGGG  
ACATGTGGGAGCCGTGAGTACCACCAAGGATGCATGGCAACTGGGGGTCTGAAATGA  
AGGGTGCTGGGTGGGCTCTGGATGGG

>2669

TGACCTATGCCAAGAGTGTGAGGACATCGTCCACATCCTTAACAAGATGGCCAAGGAG  
GCCATTTTCCAGGTAATGATGCCCAGATCCTGGATGAAGGTTGGGGCCCAAGAGATGA  
GGGACAGAGCAGGGAAGAGCTGAG

>2670

CATGCCCCAGTGCAACCAAGTGCTTGACGACTACTTCCCCCTGGTCATCGACTACTTCC  
AGAACCAGATTGTGAGGGCTGCAAGCTCACCTCCTGCCTGCCTCCCCACGCAGGCCCC  
TGTGCCCACCCATGGGGGAGCCA

>2671

TCTGCTGGACAAGCTCGTCCTCCCTGTGCTGCCCCGGGGCCCTCCAGGCGAGGCCTGGG  
CCTCACACACAGGTGAGGGAGGCCCCACAGCCAGTAAAGTGGAGATCCAGAGGGCT  
AGAGCCACCTCCGAAGCCCATGGGC

>2672

CCCCATTCTCTCCCCTATTGCTGGCTCTGCAGGGCTCTGATCAAGCGGATCCAAGCCA

TGATTCCCAAGGTGAGGCATCCAGGGCCTCAAGAGCCCAGGAGCACACGCATACCTGT  
AGCTCCCTGCAGCTCCCACCTCT

>2673

GGCCGCATGCTGCCCCAGCTGGTCTGCCGCCTCGTCCTCCGGTGCTCCATGGATGACA  
GCGCTGGCCCAAGTGAGCCCCTGCCCCCTCCTTAGCCCAATGCCCGCTCTCCTCCTCC  
CCCTACCCTGCCACTGCATGACC

>2674

CAGCAGCGAGCAGGCCATACCACAGGCAATGCTCCAGGCCTGTGTTGGCTCCTGGCTG  
GACAGGGAAAAGGTATGGGCTGGGCACATGGGGACTCATGGTCAGGGCCCGTTCAAG  
GCAGAAGGCTGAGCCCAGGAAAGGC

>2675

TGTGGAGCAGCACACGCCCCAGCTGCTGACCCTGGTGCCCAGGGGCTGGGATGCCCA  
CACCACCTGCCAGGTACACCCAACCCCTCCCAAGTTGGTCCTAGGACTTCCCTTGGCT  
CCCAGAGCCCCCACCCTTTGGGCCC

>2676

TGTCGCTGCAGGTGGAGCAGCTGCTCCACCACCGGCGCTCGCGCTACCAGGACATCCT  
CGTCTTCCGCAGGTACCGCCGCTGCCCCGAGGCGCCTGCCCCCTAGGCTCAGCCCGGG  
CCGCCTGCTGCCCCGCTCACGGGC

>2677

GAGAGACGAGTTCTCCTACCAGGAGATGATCGCCAACCTGCCTCTCTGCAGCCACCCC  
AACCCGCGAAAGGTACCCCAAGTGTCCCCTGGAACAGTGCCGGACGAGGGGCGGCCCC  
AGGTGTGCTCCGGGCTCTTCCCAGA

>2678

TGGAGGTGTCTCTGCGGGAGGTGGTGAAGCACCCCTCCGTGGAGTCCGTGGTCCAGTG  
TGAGATCGACGAGGTGAGTGCCGGCGTAGAGCCAGGTTTGAGTCCTGGTTCTCCCAGC  
GGCCAGCTGTGCCCTGAAATGGCTG

>2679

GGTTTTGAGTTCATGAAACAGAATCAGGATGCCTTCGACGTGATCATCACTGACTCCTC  
AGACCCCATGGGTAAGCAGTGGATGGGCCCCAGGGTTTTCTGGCAGCTGCAGGTCTGG  
AGGTCAGCCTCCCCCAGGCCTTC

>2680

CTCTTCAAGGAGTCCTATTACCAGCTCATGAAGACAGCCCTCAAGGAAGATGGTGTCC  
TCTGCTGCCAGGGTGAGCCACAGGCCTGGAGCACTGGGGCGGGGCGGGGTGGGGCA  
GGGCAGGCCCTGCCGGATGCTGATGC

>2681

CTATGCCTACTGCACCATCCCCACCTACCCCAGCGGCCAGATCGGCTTCATGCTGTGCA  
GCAAGAACCCGGTGAGATGGGGGTGTCTGGGGGTGGGGGTTGGGGGAAGGTGGGC  
ATAAATAGAGATCCCTGCCCCTGCC

>2682

GATGCAGCTGAAGTACTACAACTCCGACGTGCACCGCGCCGCCTTTGTGCTGCCCCGAG  
TTTGCCCGCAAGGTGGGTGGCCTGCGGGGCTGGGTGGTGGGACCCAGGGACCCAGAG  
CGCCCTCCTGACTGGCCTCATGTCC

>2683

GTCGGAAGAGGTGTGGCGGCATCCTAGTGAGAAAGGACTTTGTGCTGACAGCTGCTC

ACTGCCAGGGAAGGTAAGGAGCAGCACCAGCTCACCTCCTGAGTTCCCCCTACAGGG  
ACCCTTGTTTTCTCCTGGGGACTGCA

>2684

TGTGAAAAGACCCATCCCCATCCAGCCTATAATCCTAAGAACTTCTCCAACGACATCA  
TGCTACTGCAGGTGAGGCACACTCCTGCCACTCTTGCTCTTCTTGGTCCAGTTGGTTCC  
ACTCCCACTGGGATGCCGGCCC

>2685

CCATGGCAATTACAGCAGAGCCACTGAGATTTGTGTGGGGGATCCAAAGAAGACACA  
GACCGGTTTCAAGGTTGGGTTTCCAGCCTCTACCCAGAAAGACCACAGGGAGAGAGG  
AACTTGAGGGAGTTCTGGGGTATGAC

>2686

GCAGATCTTTCGGATACCGAGCTGACCACCTTGCTGCGCCGGTACAACATCCCGCACG  
GGCCTGTAGTAGGTACGCGGCGGCGGGCGGGACCCCTTCCGGGGCCCCCTTCCTTCGTG  
CTCCGCCTTCGCGACCTCCCCGCT

>2687

GAGTACGAGACCCAGAGGCGGCGGCTCTCGCCCCCAGCTCGTCCGCGCCTCCTCTT  
ATAGCTTCTCTGGTGAGAGCCTCGCCTGTGGGGTCAGCCTGGGACGCGGGGAGGATGG  
GGTCGCGAGGGTGTGGCAGGGGGG

>2688

TCGACTAGAGGGGATGCAGATATGTATGATCTTCCCAAGAAAGAGGACGCTTTACTCTA  
CCAGAGCAAGGGTAAGGCAGGGGTTGGGTGGGCACGCTGGCACCTTCACCCGACTTC  
GTCAGGGACCCCGCTCACAGGGAG

>2689

TGCCGGCCCGTCCAGGGCTGTCCGCCAGTCAGTGACTTCATTCCCAGATGCTGACGCT  
TTCCATCACCAGGTGAGCTGGCTGGCAGGCGTCCTGTACTTGGGTACAACCTAGGGGA  
TCGCGGCTGTGTTTGGATAAATCC

>2690

GTTGTGGGTCTAATTCAAGACCTCAAGCCAAACACCATCATGGTCTTAGTGAACTATAT  
TCACTTTAAAGGTAAGACTTTCAGATGTCAATTTTCAGTCTAGGGCTCAGATACTTGGG  
TGGAGTGCTGAGGGGAGCTCAT

>2691

AGATGGAGTCAGTGGAAGCTGCCATGTCATCTAAAACACTGAAGAAGTGGAACCGCTT  
ACTACAGAAGGGGTAAATGCCTTAGAGGATGTGTGGGTGGAAGGTGGGCATAAAAGT  
GCAGGTGAGACAGAGTTCAGCAGAA

>2692

TCAGCATGCCTATTCTGAAAATGCTGATTTTTCTGGACTCACAGAGGACAATGGTCTGA  
AACTTTCCAATGTAAGTTGATAAACTAGAGTTCTTAAATGTATGAACTGGAAGAGCAAT  
TAGGAGTCAATTGATTCAACTT

>2693

GCTAACGCCTCTTTTCCCCCTAATTGTTAAAAGCTATGGACTGCAGGAAGATGGCCCGC  
TTCTCTTACAGGTATGAGCTAATCTTAGAATAGTGAACCTTTTTTTGATTGCTAGAGATTG  
CCAGCTTAGGAAGTAATGTTT

>2694

TGGCCCCAGGAGGAGCCTGCAATTCGGCCTCGGTCTTCCCAGCGTGTGCCGCCCATGG

GGATACAGCACAGTAAGAACTGCCTGACTTCGATGCTTCTGCCCTGGCCCTTCATGTGT  
CTCCTGACTATCTTTCCAACACT

>2695

TGCTGGGGTCCTTTTGTGCCTGCCCTCCCTCCTTCTACGGACGGAACGTGTGAGCACGAT  
GTGCGCAAAGAGTAAGCAATTCAGAGGGGCGGGGAGCCGTGGAGAGGAGAGAGAAA  
GGGAAGTGGAATTTTCAGACCCAAG

>2696

AAGTGTTCCTGTGTAAATGCTGGCACGGTCAGCTCCGCTGCTTTCCTCAGGCATTTCT  
ACCCGGCTGTGGTAAGCGGAGGTTCTCCTCTTTCTTTTGCCCTTTGAAGTTACGTAGTT  
GCCTTGGGGGGTGCTTAGTTAG

>2697

CGCCCCGAGACCGCCGTCGCTCGGACGCTCCTGCTCGGCTGGGTCTTCGCCCAGGTGG  
CCGGCGCTTCAGGTGAGTGGCACCAGCCCCTGGAAGCCCGGGGCGGCCACACGCAG  
GAGGGAGGCGACAGTCCTGGCTGGC

>2698

CAACTAATTTCAAGACAATTTTGGAGTGGGAACCCAAACCCGTCAATCAAGTCTACAC  
TGTTCAAATAAGGTAAAGCTGGGTACAGAAAAAGAAAATTAAGGTCTTTGATGTTTCTAC  
TGTCCTATGCTGAACAAGAATGT

>2699

GTGGAGAGCACCGGTTCTGCTGGGGAGCCTCTGTATGAGAACTCCCCAGAGTTCACAC  
CTTACCTGGAGAGTAAGTGGCTTGGGCTGTAATACCGTTCATTCTTGTTAGAAACGTCT  
GAACATTCTCGTGATCTTGTGCC

>2700

CCTCCGGGATGTTTTTGGCAAGGACTTAATTTATACACTTTATTATTGGAAATCTTCAAG  
TTCAGGAAAGGTGAGCATTTTTTAATTTGTTTTTATGACCTGTTTTAAATTGTGAATACT  
TGGTTTTACAACCCATTTCT

>2701

CGAACAGTTAACCGGAAGAGTACAGACAGCCCGGTAGAGTGTATGGGCCAGGAGAAA  
GGGGAATTCAGAGGTGAGTGGCTCTGCCAGCCATTTGCCTGGGGGTATGGGTGCTGTG  
GGTGAATTCTGGAGGAGTAGCTCCA

>2702

GTCCGAGGCTTGCAGCTGCCTGGCTGCCTGGCCCTGGCTGCCCTGTGTAGCCTTGTGC  
ACAGCCAGCATGGTAAGGGAGTGCTTGCAGGCTGGAACAGGCTGGAGGACTGGGGTG  
TGGGCCCATGGGCTGGGGTCTCCTG

>2703

GCGAGAGTGCGTGGAGGAGACGTGCAGCTACGAGGAGGCCTTCGAGGCTCTGGAGTC  
CTCCACGGCTACGGTGAGCCTGGGCTGCTCGGACGGTGCCGGGGCCTCAGACCGGGC  
CCAACTCTAGACACTTCCACAGAGAA

>2704

GGCATGTGAACATCACCCGGTCAGGCATTGAGTGCCAGCTATGGAGGAGTCGCTACCC  
ACATAAGCCTGAGTGAGTGAGGGGTCGGCCTTCCCACCATGGGCTGAGAACAGGGAG  
CAAGCGTACCTCAAGTTCAACAGCC

>2705

ACCACGGGACCCTGGTGCTACACTACAGACCCCAACCGTGAGGAGGCAGGAATGCAGC

ATCCCTGTCTGTGGTAGGCTGGGGGCAGTGGGGCGACCCATGACCAAGCCCGGGGGC  
TTCATGGGGCCTGGCAGCCTGGGATG

>2706

GAGGAGGGCGTGTGGTGCTATGTGGCCGGGAAGCCTGGCGACTTTGGGTACTGCGAC  
CTCAACTATTGTGGTGAGCTGCCTGGGTAGGGGGCCTGAGTTGCAGGGACAAATCCTA  
GTGGGAATAACAACAGCCGCTTCTG

>2707

GAAGGGCGTACCGCCACCAGTGAGTACCAGACTTTCTTCAATCCGAGGACCTTTGGCT  
CGGGAGAGGCAGGTGAGGTAGTGGGCATCCGAGGGGATGCGGGGCTGCGGGGCTGGT  
GGCCAGGACTTGCCCTCACTGCTT

>2708

AGCTCCTGGAATCCTACATCGACGGGCGCATTGTGGAGGGCTCGGATGCAGAGATCGG  
CATGTCACCTTGGTGTGTCTGGAGCCCTGCGCTACCATTCACTCCTGGGGGCAGGTGT  
GCTGCTGGACCCCCACCCTCAGG

>2709

ACCCGCCCTGGGACAAGAACTTCACCGAGAATGACCTTCTGGTGCGCATTGGCAAGC  
ACTCCCGCACAAGGTACAGAACTGGTGGCCCGTGGGTGTCTGGCAGGGGTCTGAGTC  
CTCCAAAGCGATCATGAGGGGCCTTG

>2710

TGAAGAAGCCTGTTGCCTTCAGTGACTACATTCACCCTGTGTGTCTGCCCGACAGGGA  
GACGGCAGCCAGGTGGGCCACCAGATGCTTGTTAGCTGAGGGGCAGAAGCCAAGTTC  
TGGGCCTGGCTCTGATACCAAGTAG

>2711

TTACAAGCCTGATGAAGGGAAACGAGGGGATGCCTGTGAAGGTGACAGTGGGGGACC  
CTTTGTCATGAAGGTAAGCTTCTCTAAAGCCCAGGGCCTGGTGAACACATCTTCTGGG  
GGTGGGGAGAACTCTAGTATCTAG

>2712

TCTTCCTACCAATCTGCTCCCCAGAGGGCTGCCTGCTGTGCACTTGGGTCCTGGAGCCC  
TTCTCCACCCGGTGAGTGGCCAGCAGGGTGTGGGGTTATGTGAGGGTAGAAAGGACA  
GCAAAGAGAAATGGCCTCCAGCT

>2713

GGATTGAGGGGAGAGGCCCAAACAGGGAGCCACGCCAGCCAGACACCCCGGCCAG  
AATGGAGCTGACTGGTGAGAACACACCTGAGGGGCTAGGGCCATATGGAAACATGAC  
AGAAGGGGAGAGAGAAAGGAGACACGC

>2714

TCCTCCTGCTTGTGACCTCCGAGTCCTCAGTAACTGCTTCGTGACTCCCATGTCCTTC  
ACAGCAGACTGGTGAGAACTCCCAACATTATCCCCTTTATCCGCGTAACTGGTAAGAC  
ACCCATACTCCCAGGAAGACACC

>2715

TCACCCTTTGCCTACACCTGTCCTGCTGCCTGCTGTGGACTTTAGCTTGGGAGAATGGA  
AAACCCAGATGGTAAGAAAGCCATCCCTAACCTTGGCTTCCCTAAGTCCTGTCTTCAGT  
TTCCCACTGCTTCCCATGGATT

>2716

CCTCCTGGGGCAGCTTTCTGGACAGGTCCGTCTCCTCCTTGGGGCCCTGCAGAGCCTC

CTTGGAACCCAGGTAAGTCCCCAGTCAAGGGATCTGTAGAAACTGTTCTTTTCTGACT  
CAGTCCCCCTAGAAGACCTGAGGG

>2717

TACACGTGTGCACTCCACCACTCTGGCCATTCCCCACCCATCTCCTCCCAGAACGTAC  
AGTGCTCAGAGGTGAGACAAGCCCCCTAACAAGGTCAAGTGAGCTGGGAGAGCCAGG  
CTCGGGGACAGCAGGCAGTTCCCTT

>2718

AGTACAAGTGCCTGGTGATCAAGTATGCCAAAGACACTCGCTACAGCAGCAGCTTCTG  
CACACATGACCGGTCAGTCCCTGCCCCCTGCAGTCCTGTCCAGTGAAAAATCACAAGG  
CACAGGACACACTGTTAGGACTCT

>2719

CTGCCTGCTCCGAGACGTGGCCCAGGAGGCCCTGGGCGTGGCTGTCATAGGCATCGAC  
GAGGGGCAGTTTGTAAGTTGGCTTGTCTTGGCATCACTCTTCCTGCCTTCCGCTGTGTC  
CTCCCGTTTTCCCTCGCTGACTT

>2720

CTGCGAGGCCATGGCCAACGCCGGAAGACCGTAATTGTGGCTGCACTGGATGGGAC  
CTTCCAGAGGAAGGTAAGGCGTCTGATCCAGGTCTGGAGCTGGGATTGAGGAGGGCA  
AGAGGCTTCTGGATGGGCACAGAGAC

>2721

GCTGACGGCGGTGTGCATGGAGTGCTTCCGGGAAGCCGCCTATACCAAGAGGCTCGGC  
ACAGAGAAGGAGGTAGCTCCACCTGCCTTCCCTGCAGGCCGGCGGGGTGGGGGTATG  
GCTCTGCCTCCTTCCTGTCTGGCC

>2722

ATGAGGATGCTGGGCCAGACACCCACCAAGGAGGAGCTGGACGCCATCATCGAGGAG  
GTGGATGAGGACGGTGAGCGGGTGTCCCTCGGAGGCAGGGGATGGTGGGGAGAGGC  
GGCAGCGGCTGGGCTCAGGCTCAGTCT

>2723

GCCAGATGAAAGAGGACGCGAAAGGGAAGAGCGAGGAGGAGCTGGCCGAGTGCTTC  
CGCATCTTCGACAGGTGCGCTGGGGGCCCGGAGCCGAGGGAGGGGCTTAGCAGTCA  
GAACCCGGCCGGCAGCGCTGGAAGCTT

>2724

ACGGACGAGGAGATCGAATCTCTGATGAAAGACGGCGACAAGAACAACGACGGCCGC  
ATTGACTTCGACGGTGAGGGCCAACGGGAGCTTGGAAGAGCGGGTGGGAGCCCCAG  
AGGACGGCGGGCACTGGTGCCTGGCT

>2725

CCTCTGCCTGGGCCTCGGTCCCTCCTGCACCTGCTGCCTGGATCCCCGGCCTGCCTGG  
GCCTGGGCCTTGGTGGGTTTGGTTTTCCTTCTCTGTCTCTGACTCTCCATCTGTC  
AGTCTCATTGTCTCTGTACAC

>2726

AAGGGTGTGTGGCACCACCCTACACCTCCTCCTTCTGGGGCTGCTGCTGGTTCTGCTG  
CCTGGGGCCCAGGTGAGGCAGCAGGAGAATGGGGGCTGCTGGGGTGGCTCAGCCAA  
ACCTTGAGCCCTAGAGCCCCCCTCAA

>2727

CAGACTGCCCCGTCAGCACCCCAAGATGCATCTTGCCACAGCACCCCTCAAACCTGCTG



CTCACCTCATTGGTAAACATCCACCTGACCTCCCAGACATGTCCCCACCAGCTCTCCTC  
CTACCCCTGCCTCAGGAACCCAA

>2728

GATCGTGGCAGGCGCCACCACGCTCTTCTGCCTGCTGCACTTTGGAGTGATCGGCCCC  
CAGAGGGAAGAGGTGAGTGCCTGGCCAGCCTTCATCCACTCTCCACCCAAGGGGAA  
ATGGAGACGCAAGAGAGGGAGAGAG

>2729

GGCAAGCTGAAAAAGAAAAAATGGCCAAGAGGATCCAGCAGGTGTACAAAACCAA  
GACGCGGAGCTCAGGTACCCTTTAAGGAGGTGGGGAAGGGCCACCGAGCCCACAGAT  
GATGGAGAGCAGACCTTGGGGGCAGTG

>2730

AGCTGAGATCCTACAGGAGTCCAGGGCTGGAGAGAAAACCTCTGCGAGGAAAGGGA  
AGGAGCAAGCCGTGGTAGGTCGGGTTTCTGTACCTTGGGGTCTGTCTCCTCTTCTTTCT  
CTTAAAAGTCTTTCCAGCAAGCTGA

>2731

GGATGCAATGAAGAGAGGGCTCTGCTGTGTGCTGCTGCTGTGTGGAGCAGTCTTCGTT  
TCGCCCAGCCAGGTTGGTGTGCAGGATCCCTGTGTCCCGCCCCTCAAGGCTGTGATGC  
TTCCGGAGGCTCCAGGGGTCTGTG

>2732

AGAAGCAACCGGGTGGAATATTGCTGGTGCAACAGTGGCAGGGCACAGTGCCACTCA  
GTGCCTGTCAAAAGTATGTGCTGAGGCTGGAAGGTGGTGCATGCCTGTGATCCCAGCA  
CTTTAGGAGGCCAAGGTGGGAGGGT

>2733

CAGGCCCTGTACTTCTCAGATTTTCGTGTGCCAGTGCCCCGAAGGATTTGCTGGGAAGT  
GCTGTGAAATAGGTGAGTAGGTGAGAGCACGTGAAACGAGCTGAAATCCCACCTCTC  
CAGTCTCCCCCGCCCCGGAAGGAA

>2734

CCCAGAAGCCCTACAGCGGGCGGAGGCCAGATGCCATCAGGCTGGGCCTGGGGAACC  
ACAATACTGCAGGTGAGGGCACATCCCCAAGGAGGGATTCCCCCTGTGAGAAGCTG  
CTACAGCTGGGGAAAGATTCTGTCAG

>2735

CCCTGGTGCTACGTCTTTAAGGCGGGGAAGTACAGCTCAGAGTTCTGCAGCACCCCTG  
CCTGCTCTGAGGGTAAGTGGCAGCCACCCCGCCTTTCCTGAATGTCCCTGGGGGAGG  
AAAGTCCAGGAGGACAGGCCGATA

>2736

TAGGCAAGGTTTACACAGCACAGAACCCAGTGCCCAGGCACTGGGCCTGGGCAAAC  
ATAATACTGCCGGTAGGTAGCACAGGGGTGGGGGGTTCAGGTCTTGGCAGAACGTGG  
GATTAGGGTGTGAGACGGGGGAAGA

>2737

GCCAAGCCCTGGTGCCACGTGCTGAAGAACCGCAGGCTGACGTGGGAGTACTGTGAT  
GTGCCCTCCTGCTGTAAGGGCTGGGCCCCGGCTGCCTCCCTGCACCTGTCTCCCTTCTT  
CACCATCTCCTCGCCACTTTCTAG

>2738

GGTTCCTGTGCGGGGGCATACTCATCAGCTCCTGCTGGATTCTCTCTGCCGCCCCACTGC

TTCCAGGAGAGGTAGGGGCTCGGAAACCCAGTTGGTTTTTCCACCCTCTAACGCCTAG  
AAACCAAGCCCTTTAGGGGAAAT

>2739

CAGAAATTTGAAGTCGAAAAATACATTGTCCATAAGGAATTCGATGATGACACTTACGA  
CAATGACATTGGTAAGAGCTCGTCATTCCCGGCTCCAGTTCATACAGATCACACAACAC  
ACCCACATGCACTCACCTATGT

>2740

CCCCCGGCGGACCTGCAGCTGCCGGACTGGACGGAGTGTGAGCTCTCCGGCTACGGC  
AAGCATGAGGCCTGTAAGTGGAAGGAAGCCTCGGCCCCATCCTGTCTGCGGGACAGC  
AGGGGAGGCTGCGGTCCACCAGAGGA

>2741

CGACAACATGCTGTGTGCTGGAGACACTCGGAGCGGCGGGCCCCAGGCAAACCTTGCA  
CGACGCCTGCCAGGTAACCAGGAGTGGCGGCCCATGCTGGGCACAACCCAGGGGAGA  
ATGCCCTGGGACAACAGGTTCTTCA

>2742

CGTCAGCCTTGGCCTCATTGCTGCCCTGCAGGCCACCACCTCCTGGCCTCAGACGAG  
GAGATTCAGGATGTGAGGCCCGGATGGAAGGCTGGGCTGGAGGGGGCAAGGGGCGA  
GGCTGAGACTGGATGGAGACCCCATG

>2743

TGGAATCGGTGACACCCATGACCCTCACGACCCTGGAAGGGGGCAACCTGGAAGCCA  
AGGTCACCATGCTGTGAGTGTCTGCCAGCCGGCCGGGCAGCCTGCAACCTGGTCTAGG  
GCCTTCCCTTTCCCCACCCAGGAGA

>2744

ATAAGTGGCCGGTGCCAGGAGGTGAAGGCCGTCTTGAGAAAACTGACGAGCCGGGA  
AAATACACGGCCGGTGAGTCCCGGGGCCTGAGCCAGAGCCTGAGCTTGAACACACGC  
TGGATGTGGGGGGGCAGCCAGTGCCT

>2745

AAGGACCACTACATCTTTTACTGTGAGGGCGAGCTGCACGGGAAGCCGGTCCGAGGG  
GTGAAGCTCGTGGGTGGGTCCCGCACCCCTCACCTGCAACCCATGCCTCCACCTGCCC  
TCCCTCCTCCCTCGCCCTCCTGCAC

>2746

GAGGACTTTGAGAAAGCCGCAGGAGCCCGCGGACTCAGCACGGAGAGCATCCTCATC  
CCCAGGCAGAGCGGTAGGAGGCATGGCCCTGCAGAGCCCCCATGTCCCCGCGTGGG  
GACATCAGCAGAGCTGCATTGCACGG

>2747

TGATGGAGCAGCATTAACTAAGAAAGACCTGAAGAACCTCCTTGAAAGGGAATTTGG  
AGCTGTGCTTCGGGTAAGAACTAACAAGAAAATGAGATCTATTGACTTGAGGCTATGA  
GATTTATTCTCAGAGGAGACCAGAG

>2748

ATGAGGATGCTGGGCCAGAACCCACCCCTGAGGAGCTGCAGGAGATGATCGATGAG  
GTGGACGAGGACGGTGAGCCCCCTCCTCCCCAGGCTCCAGAAGAACCCAGCTGGC  
TGGGGGCTGGAATGCTGGCTCTGTTT

>2749

GGTGCATGAAGGACGACAGCAAAGGGAAATCTGAGGAGGAGCTGTCTGACCTCTTCC

GCATGTTTGACAAGTGAGCACGTGACCCTTGACCTCTGACCCTGACCCACACTCAAGC  
CGAGCTGTACAGGAGGGCAGTCTCA

>2750

ACGGAGGACGACATCGAGGAGCTCATGAAGGACGGAGACAAGAACAACGACGGCCG  
CATCGACTATGATGGTAAGCGGGTGGGTGGGCTGATCTCCTGCCTCCATGCCCTGCCCA  
GCCCCTACCCTCAACCCACACCTGC

>2751

GTTTAACTGGGTGTCCCGGCTGGCAAACCTCACGCAAGGCGAAGACCAGTACTATCTG  
CGGGTCACCACGGTGAGCTGTGTCCCGGCCACATGCTGTCGGTCGGAGCCCGACGTGT  
GATCGAGCAGGGGCATGTGTGCTT

>2752

CCAGGAAGAACCCTAAATTTATGGAGACCGTGGCGGAGAAAGCGCTGCAGGAATACC  
GCAAAAAGCACCGGTAAGCAGGCGGGCCTTTCTGCGCGTGCAGGGCCCAGTGAGTC  
TCTGGGAGCCACAAAAAACAACAA

>2753

AGGAAGGACGACCGCACGGGCACCGGCACCCTGTTCGGTATTCGGCATGCAGGCGCGC  
TACAGCCTGAGAGGTGACGCCGCGGGCCCCCTGCGGGACGGGTGGCGGGAAGGAGGG  
AGGCGCGGCTGGGGAGAGCGCTCGGGA

>2754

ATTCCTCTGCTGACAACCAAACGTGTGTTCTGGAAGGGTGTTTTGGAGGAGTTGCTG  
TGTTTTATCAAGGTAAAGAAGTCGCTGCTATTAGAAGTCAGTAGTCTGTTCTCAACACA  
GCAGCCAGTGAGATCCTTTCAAA

>2755

GGGGACTTGGGCCCAGTTTATGGCTTCCAGTGGAGGCATTTTGGGGCAGAATACAGAG  
ATATGGAATCAGGTGAGGAGATAGAACAATGCCTTCCATTTCCGGGTGCCCTTCCTAGC  
ACGTGTTTGCTCCGTTGTTTTAG

>2756

AGAGTGATTGACACCATCAAAACCAACCCTGACGACAGAAGAATCATCATGTGCGCTT  
GGAATCCAAGAGGTTGAAAGAACCCCGTCGTCTTCATTTATACTAACCATACTCTTAGA  
GGGAAGCAATCTGGTTTTGTGCA

>2757

CGGTGTGCCTTTCAACATCGCCAGCTACGCCCTGCTCACGTACATGATTGCGCACATCA  
CGGGCCTGAAGGTGGGCTGTCTCGGGAAGGGTGACTTGCCAGCCTACCACATGAGCT  
CTTCAGTTCTTTAATATGGGAAAA

>2758

AGGTGACTTTATACACACTTTGGGAGATGCACATATTTACCTGAATCACATCGAGCCAC  
TGAAAATTCAGGTAAGAATTAGATGTTATACTTTTGGGTTTGGTACCTTCTCTTGATAAA  
AGGTTGACTGTGGAACAGGTA

>2759

CTGGTCTCCGAGAAGCTGAACGTCCCAGTGCGCCAGCAGCGGCTGCTGTTCAAGGGC  
AAGGCCCTGGCAGGTACCCAGGGAGAGGAGACGCCCGGGGAGCCCCGCAGGAAGCG  
GGACCGGGGTGCGCGGGCCGAGGCCAG

>2760

GATCTCCAAAGTCTTGGCCCGCCACTTCAGTGCGGCAGATGCCAGCAGGGTCCTGGAA

CAGCTACAGAGGGTGAGAAGGGTAACCCTGGGCATCCTCTTCAGGCCCAGTTGCTCCC  
AGCCCCCTACCTCTGTTGCAGTGTA

>2761

CGCACATCACCTCCAGGCCCTCAGAACACCTGCCCCAGCCCCACCATGCTCATGGCGT  
CCACCACTTCCGGTAAGGCTTGCCCCCTCCATGAGTCCGGTGGGCAGAGTGGGTTTGAC  
GATTCAGGGAAGCCCCCTCTTTCTA

>2762

GTGCTGTGCTGGGCACCCTTCTTCCTGGTGCAGCTGTGGGCCGCGTGGGACCCGGAGG  
CACCTCTGGAAGGTGGGTGTAGCCGTGGCTAGGGCTGACGGGGCCACTTGGGCTTGG  
CCGCATGCCCCCTGTGCCCCACCAGC

>2763

TCTGGTAGAAAAATGAAGAGGGTCCTGGTACTACTGCTTGCTGTGGCATTGACATG  
CTTTAGAGAGAGGTAAGATTCTTTTGTGTGACCATTACAGGAATTCTTACTAGTTA  
ATTTTATATTATCACTTAAAAA

>2764

GCCGGGATTATGAAAAGAATAAAGTCTGCAAGGAATTCTCCCATCTGGGAAAGGAGGA  
CTTCACATCTCTGTAAGTGTGCAGCAGCCACTCACTCTGTTGGTGATTGATCTTGAAC  
AAAAGTGAAGTGTGAGGTAACTTT

>2765

GAAGGAAGTTGTCTCCTTGACCGAAGCCTGCTGTGCGGAAGGGGCTGACCCTGACTG  
CTATGACACCAGGGTAGGTTTCTGTGGCTGGCCGTCTCTGTGGCAGCCCAGAGAAGGA  
AGCCAAAATAGGCCTTTATACCACG

>2766

CCTACGTGGAACCCACAAATGATGAAATCTGTGAGGCGTTCAGGAAAGATCCAAAGG  
AATATGCTAATCAGTGAGTGCCTTCATCATAAATAGAACTTTAGGACCTAAAGTATCAGA  
AATGACTCTAATCTAACCCCTA

>2767

CAAGAGTTATCTTTCTATGGTAGGGTCCTGCTGTACCTCTGCAAGCCCAACTGTATGCTT  
TTTGAAAGAGGTATGTCCATTTTACTTATTATATGTTTACGTTTTTTTCTTCTAATAGCAT  
TCCTTTTAGATAATGGTA

>2768

TTCTCACCCTCTGTCAAATAGAGTCTGCTCACAATATGCTGCTTATGGGGAGAAGAAA  
TCAAGGCTCAGGTAAAGATTAAAGTGCTATTGTCATATTTAGATGTTTGGTTCTGCACTGT  
CTATCCATAATATTAGGGTTT

>2769

AGCTGAAGATATTACTAACATCCTCTCCAAATGCTGTGAGTCTGCCTCTGAAGATTGCA  
TGGCCAAAGAGGTAAGACAAGCTTTATTATCATTATCACCATGTGCCAGGTATTGAGTG  
CCAAGTACTGAGTGGCAGGTAC

>2770

AGCTTCCAGATGTAGAGTTGCCACAAACAAAGATGTGTGTGATCCAGGAAACACCAA  
AGTCATGGATAAGTAAGTAGAGGTGATGTGAAAACGTGTTCCCATTTTAAGTTCATCTG  
GACAAAAAGTGGGGGCCAGCCAG

>2771

TGAGCCAACCCTAAAAAGCCTTGGTGAATGCTGTGATGTTGAAGACTCAACTACCTGT

TTTAATGCTAAGGTATATTTGTTGGATTTTCTTTATCAAGCACATAGATCAAGGGTTGGA  
AAATTATAGTTCATGGGCCAAA

>2772

CTTTCATTGACAAGGGACAAGAAGTATGTGCAGATTATTCAGAAAATACATTTACTGAG  
TACAAGAAAAAGTAAGAACTTGTTCCTGGCTGTATCCTCCAAATTTATCAATAATATTTT  
CATAGTACTATGAATTGAAAG

>2773

TAACAAGCGCTCAGACTTTGCCTCCAAGTGTGTTCCATAAACTCACCTCCTCTTTACT  
GTGATTCAGAGGTAGGAAAATGTAACCTCCACTTAACATGGCAGAATCTTTTAAGAA  
CGTATGCACTCCAATCTACTCAT

>2774

CTCCGCGTGCTACTTCCAGAACTGCCCCGAGGGGCGGCAAGAGGGCCATGTCCGACCT  
GGAGCTGAGACAGGTACTTCCCCTGTGGGCCATCTCAGGGCAGCCATAGCGGGCAGT  
GCTGACACCCTGGGTCAGGGGCTAG

>2775

TGCCAGTCCGGCCAGAAGGCGTGCGGGAGCGGGGGCCGCTGCGCCGCCTTCGGCGTT  
TGCTGCAACGACGGTGCGCGGCGGGGGCGGGCCTGGGGGGGGGCGCAGACGCTTGG  
GTGGGGGGGACGCGGGCCTGCGGCGGG

>2776

CGTGGGCCAGAAGACCAGGACATATCTATTTCCCTTTGCATGGGATAAAAGCTCTGCTCT  
TCAGGTTTCAGGTGAGAGAGGCCAGCATAAAAAAGCTACCGAGTCTAGAGAGACGGA  
TGGGAGATGGGCTCTGGAATCACA

>2777

TGGGTGGTGGCTCTGCTAGTGAATCTGACCCAACTGGATTCCCTCCATGACTCAAGGCA  
CAGACTCTCCAGGTAAGAACAGAGCAATTGTTTTTTTCCAGTGTGTATGCAAGAATTG  
GCATGGGGGAGTGATGCCTTTCTT

>2778

AGACAGGCCGTGGATGGGGTCTGTAGACACAAGTACAGGCTGGGCGCACCCCTTCACT  
GTGGGGAGAAAAGGTGAGCTGGAAGCTGAGGTCTGGCGGGGCTCAGGAATGTCCCC  
ATGTGAACCATGGCTCTTCTTTCTTA

>2779

GAACTTGGACATGTCTACACCTGCCTTGTCGATCACTCCAGCCTGCTGAGCCCTGTTTC  
TGTGGAGTGGAGTGAGAATTAGTTTTCTAGTACTCTCTGGGCCTGACTCAGGACTATACT  
GACTCAATACAGAGCCTGTGTC

>2780

ATTGCAGCCTTCCTACTTGGGCTAATCTTCCTTCTGGTGGGAATCGTCATCCAGCTAAG  
GGCTCAGAAAGGTAATGAGCCTGTGAGGAGTGCCCTGCCACCTGTCCCAGACCTTCCC  
CACTCCACCTTCCCTAACGTCA

>2781

GCCGTCATGGCGCCCCGAACCTCGTCCTGCTACTCTCGGGGGCCCTGGCCCTGACCC  
AGACCTGGGCAGGTGAGTGCGGGGTCGGGAGGGAAACGGCCTCTGCGGGGAGAAGC  
AAGGGGCCCCGCCTGGCGGGGGCGCAA

>2782

AAGGCCCACTCACAGACTGACCGAGAGAACCTGCGGATCGCGCTCCGCTACTACAAC

CAGAGCGAGGCCGGTGAGTGACCCCGGCCCGGGGCGCAGGTCACGACCCCTCATCCC  
CCACGGACGGGCCGGGTGCGCCACAG

>2783

CTGGAGGGCACGTGCGTGGACGGGCTCCGCAGATACCTGGAGAACGGGAAGGAGAC  
GCTGCAGCGCACGGGTACCAGGGGCCACGGGGCGCCTACCTGATCGCCTGTAGGTCTC  
CCGGGCTGGCCTCCCACAAGGAGGGG

>2784

GGAGAGGAGCAGAGATACACCTGCCATGTGCAGCATGAGGGTCTGCCCAAGCCCCCTC  
ACCCTGAGATGGGGTAAGGAGGGAGATGGGGGTGTCATGTCTCTTAGGGAAAGCAGG  
AGCCTCTCTGGAGACCTTTAGCAGGG

>2785

CTGGTTCTCCTTGGAGCTGTGATCACTGGAGCTGTGGTCGCTGCTGTGATGTGGAGGA  
GGAACAGCTCAGGTGGAGAAGGGGTGAAGGGTGGGGTCTGAGATTTCTTGTCTCACT  
GAGGGTTCCAAGCCCCAGCTAGAAA

>2786

GGATGCACTTCTGCGGGGGCTCCCTCATCCACCCCCAGTGGGTGCTGACCGCAGCGCA  
CTGCGTGGGACCGTGAGTCTCCCGGGGCCTGGAGGGGTGGGGAAGGGCTGGATGTGA  
GCCCTGGCTCCCGGGTGCTCCTGGG

>2787

CCTGCCTCAGAGACCTTCCCCCGGGGATGCCGTGCTGGGTCACTGGCTGGGGCGATG  
TGGACAATGATGGTGGGTCTGGGGACAGTGGAGGTGGGGCCAGGGTCTTAGCCACAG  
CCCAGCCCCTGGGTCCCTCTGGGCT

>2788

GGGAGACGACGTCCGCATCGTCCGTGACGACATGCTGTGTGCCGGGAACACCCGGAG  
GGACTCATGCCAGGTGGGCCCCGCCTGTCCCCCGCCCCCGCCCCCAACCCCCACTC  
CCAGGCCTGTTCGGCGAGCGCTGAC

>2789

CTGAAGATCTCTGAGGAGGATGAGCTGGACACCAAGCTAACCCGTATCCCCAGTGCCA  
AGAAGTACAAAGGTAAGCGGCCACTCCTTTAACTAGCTGCACCTCTGCCTCGTCCCGT  
TGA CTATCCTTGGAGTACTTGAGT

>2790

AGACCAGTGGCACTGTTGTTTCACAAGATGATGTTTGAAACTATTCCAATGTTCA GTGG  
CGGAAC TTGCAGTAAGTGCTTGAAATTCTCATCCTTCCATGTATTGGAACAGTTTCTTA  
ACCATATCTAGAAGTTTACAT

>2791

TCAGCCGTTACCTGTGTGTGGTGATATCAAAGTAGAGTTCTTCCACAAACAGAACAAG  
ATGCTAAAAAAGGTTTGTACTTTACTTTTCATTGGGAGAAATATCCAAAATAAGGACAGA  
TTAAAAGCTATATTTTATTTTAT

>2792

TTTAACAAAAAATGATCTTGACAAAGCAAATAAAGACAAAGCCAACCGATACTTTTCT  
CCAAATTTTAAGGTCAGTTAAATTAAACATTTTGTGGGGGTGGTGACTTGTATGTATGT  
GATGTGTGTTTAATTCTAGGAG

>2793

AGCAAGGACTAGAGTTCCTGACCTCCAGGCCAGTCCCTGATCCCTGACCTAATGTTATC

GCGGAATGATGGTAAGTAAAGTGTCTCTTGCATCTGCATAGAGAGAGTCCTGGGAGCT  
 TAGGAAGTGATGGGGAACAGTGA  
 >2794  
 AAGAAAAGCCTGGAGTGCACGAAGTTGTGCCTACCCCAGATTGAGAATGTTAAGGGC  
 ACTGAGGACTCAGGTGAGGAGAGGTGACCTGGTGCCCATGCTCACCTGCCCTCTCCCT  
 CTTCTTGCCCCACCCGTCCATCCA  
 >2795  
 CTTTTATCCCTCCTCTTCATTGGTTTAATGTATCGCTACCAACGGTGGAAGTCCAAGCTC  
 TACTCCATTGGTGAGTGGGGGCTTTGGGAGGGAGAGGGAGCTGGTGGGGGTGAGGGA  
 GGACATGGGTGGGTGCGATGGAC  
 >2796  
 GCCTCCGACCCCATCCCCAACCCCTTCAGAAGTGGGAGGACAGCGCCCACAAGCCA  
 CAGAGCCTAGACAGTGCGTTTCTCCCGCGGCTGGAGACGAGGAGGCTGGGGGAGGGC  
 CGGGGGAGCGCGGGAGGCGTCAGAGG

$S_1^-$  : 2,800 false splice donor site containing sequences

>1  
 ACTGTGTCCTCATTCATGTCATTCGTCCTCAGCTGAAGGATGAAAGAGATTGGCAAGG  
 AAGCAGGAATGAGTCAGCTTTGGGGGAATATTACCTGGTGGCTCCCATCATTTATTGCT  
 TTAGGACATACCCTTTTACCTAC  
 >2  
 TCCTCAGCTGAAGGATGAAAGAGATTGGCAAGGAAGCAGGAATGAGTCAGCTTTGGG  
 GGAATATTACCTGGTGGCTCCCATCATTTATTGCTTTAGGACATACCCTTTTACCTACTTG  
 CTATCATGCTGGACCTCAGCAT  
 >3  
 ACCTCAGCATTTTCAGGGACCAGAAAAGATGGGGACACCAATGCAAGCCCAAGACTAC  
 CATCCAGAGGACCGTTCTTGCCCATGCTGCTTTCTCTAGTTTTGCTTTTCAGAGTGGTGT  
 CACCCCACTTGCTAACTCAAGAGT  
 >4  
 AGATGGGGACACCAATGCAAGCCCAAGACTACCATCCAGAGGACCGTTCTTGCCCATG  
 CTGCTTTCTCTAGTTTTGCTTTTCAGAGTGGTGTACCCCACTTGCTAACTCAAGAGTGC  
 ATCACTAGGCTTCCTGAGCAGGT  
 >5  
 CAAGCCCAAGACTACCATCCAGAGGACCGTTCTTGCCCATGCTGCTTTCTCTAGTTTTG  
 CTTTCAGAGTGGTGTACCCCACTTGCTAACTCAAGAGTGCATCACTAGGCTTCCTGA  
 GCAGGTTTGATCAGGATTTGGCC  
 >6  
 AGCCCAAGACTACCATCCAGAGGACCGTTCTTGCCCATGCTGCTTTCTCTAGTTTTGCT  
 TTCAGAGTGGTGTACCCCACTTGCTAACTCAAGAGTGCATCACTAGGCTTCCTGAGC  
 AGGTTTGATCAGGATTTGGCCTG  
 >7  
 CCGTTCCTGCCCATGCTGCTTTCTCTAGTTTTGCTTTTCAGAGTGGTGTACCCCACTTG  
 CTA ACTCAAGAGTGCATCACTAGGCTTCCTGAGCAGGTTTGATCAGGATTTGGCCTG

GTCTGTTGGTCAGGGAGGCAGAG

>8

TAGTTTTGCTTTCAGAGTGGTGTACCCCCACTTGCTAACTCAAGAGTGCATCACTAGGC  
TTCCTGAGCAGGTTTGATCAGGATTTGGCCTGGGTCTGTTGGTCAGGGAGGCAGAGGT  
GTGGGGAGAAGGGTGAAAGGTGA

>9

TCACCCCACTTGCTAACTCAAGAGTGCATCACTAGGCTTCCTGAGCAGGTTTGATCAG  
GATTTGGCCTGGGTCTGTTGGTCAGGGAGGCAGAGGTGTGGGGAGAAGGGTGAAAGG  
TGACTGAGCCAGGGTTCACAGGCTC

>10

CCCCTTGCTAACTCAAGAGTGCATCACTAGGCTTCCTGAGCAGGTTTGATCAGGATTT  
GGCCTGGGTCTGTTGGTCAGGGAGGCAGAGGTGTGGGGAGAAGGGTGAAAGGTGAC  
TGAGCCAGGGTTCACAGGCTCCTCA

>11

GTGCATCACTAGGCTTCCTGAGCAGGTTTGATCAGGATTTGGCCTGGGTCTGTTGGTCA  
GGGAGGCAGAGGTGTGGGGAGAAGGGTGAAAGGTGACTGAGCCAGGGTTCACAGGC  
TCCTCACTCACGGGGCTGAAGCTGG

>12

GATTTGGCCTGGGTCTGTTGGTCAGGGAGGCAGAGGTGTGGGGAGAAGGGTGAAAGG  
TGACTGAGCCAGGGTTCACAGGCTCCTCACTCACGGGGCTGAAGCTGGGCATCGTCA  
GGCTCAGAGCCCCTAGACGTGCGGCA

>13

GGGAGAAGGGTGAAAGGTGACTGAGCCAGGGTTCACAGGCTCCTCACTCACGGGGCT  
GAAGCTGGGCATCGTCAGGCTCAGAGCCCCTAGACGTGCGGCAGCGGTAGCCCTTCTT  
CTTGAGCACGTGGCAGATCATGAAG

>14

GAGCCAGGGTTCACAGGCTCCTCACTCACGGGGCTGAAGCTGGGCATCGTCAGGCTC  
AGAGCCCCTAGACGTGCGGCAGCGGTAGCCCTTCTTCTTGAGCACGTGGCAGATCATG  
AAGCCTACAGGCCCATGAGGAAGAA

>15

CACAGGCTCCTCACTCACGGGGCTGAAGCTGGGCATCGTCAGGCTCAGAGCCCCTAG  
ACGTGCGGCAGCGGTAGCCCTTCTTCTTGAGCACGTGGCAGATCATGAAGCCTACAGG  
CCCATGAGGAAGAAGACCAGCACAA

>16

GCTGAAGCTGGGCATCGTCAGGCTCAGAGCCCCTAGACGTGCGGCAGCGGTAGCCCTT  
CTTCTTGAGCACGTGGCAGATCATGAAGCCTACAGGCCCATGAGGAAGAAGACCAGC  
ACAAGCAGGAAGAGCATATATAGCC

>17

GAAGCCTACAGGCCCATGAGGAAGAAGACCAGCACAAAGCAGGAAGAGCATATATAGC  
CCATGTTGGGGCGGTTCCAGGTCAGGCTGTGGTTCGACATGAGGCCCTGGGGGGCG  
AGCGCGGGCCAGGGCGCCTCCTGGGT

>18

ACAGGCCCATGAGGAAGAAGACCAGCACAAAGCAGGAAGAGCATATATAGCCCATGTT  
GGGGCGGTTCCAGGTCAGGCTGTGGTTCGACATGAGGCCCTGGGGGGCGAGCGCGG



GCCAGGGCGCCTCCTGGGTTTAGGGG

>19

AGGAAGAAGACCAGCACAAAGCAGGAAGAGCATATATAGCCCATGTTGGGGCGGTTCC  
AGGTCAGGCTGTGGTTCCGACATGAGGCCCTGGGGGGCGAGCGCGGGCCAGGGCGCC  
TCCTGGGTTTAGGGGGCTGCAGCTGG

>20

CGGTTCCAGGTCAGGCTGTGGTTCCGACATGAGGCCCTGGGGGGCGAGCGCGGGCCA  
GGGCGCCTCCTGGGTTTAGGGGGCTGCAGCTGGGAATGGGGGAGGGGTAAAGAATGCC  
GTCCTCAGGATCTGAAACAAGCACGT

>21

GCCCTGGGGGGCGAGCGCGGGCCAGGGCGCCTCCTGGGTTTAGGGGGCTGCAGCTGG  
GAATGGGGGAGGGGTAAAGAATGCCGTCCTCAGGATCTGAAACAAGCACGTCTAAGAC  
GTCCGGCTGAGGTCCGGCCCCACCCC

>22

CGAGCGCGGGCCAGGGCGCCTCCTGGGTTTAGGGGGCTGCAGCTGGGAATGGGGGAG  
GGGTAAAGAATGCCGTCCTCAGGATCTGAAACAAGCACGTCTAAGACGTCCGGCTGAG  
GTCCGGCCCCACCCCCTACCCAACCA

>23

GGGTTTAGGGGGCTGCAGCTGGGAATGGGGGAGGGGTAAAGAATGCCGTCCTCAGGAT  
CTGAAACAAGCACGTCTAAGACGTCCGGCTGAGGTCCGGCCCCACCCCCTACCCAAC  
CATGGGAGCTGTCCGGGCCAACAGTG

>24

GGGCTGCAGCTGGGAATGGGGGAGGGGTAAAGAATGCCGTCCTCAGGATCTGAAACAA  
GCACGTCTAAGACGTCCGGCTGAGGTCCGGCCCCACCCCCTACCCAACCATGGGAGCT  
GTCCGGGCCAACAGTGCTGTTTCGC

>25

GATCTGAAACAAGCACGTCTAAGACGTCCGGCTGAGGTCCGGCCCCACCCCCTACCCA  
ACCATGGGAGCTGTCCGGGCCAACAGTGCTGTTTCGCCTTTCGGCAAGAGGTCAGCG  
ACAACGCAAGCTCTCTACCACGACC

>26

CACGTCTAAGACGTCCGGCTGAGGTCCGGCCCCACCCCCTACCCAACCATGGGAGCTG  
TCCGGGCCAACAGTGCTGTTTCGCCTTTCGGCAAGAGGTCAGCGACAACGCAAGCTC  
TCTACCACGACCATGGTCCGCTTCC

>27

CCGGCCCCACCCCCTACCCAACCATGGGAGCTGTCCGGGCCAACAGTGCTGTTTCGCC  
TTTCGGCAAGAGGTCAGCGACAACGCAAGCTCTCTACCACGACCATGGTCCGCTTCCC  
CGACGCCCCGAGCGTTCCCCTTTC

>28

CGGGCCAACAGTGCTGTTTCGCCTTTCGGCAAGAGGTCAGCGACAACGCAAGCTCTCT  
ACCACGACCATGGTCCGCTTCCCCGACGCCCCGAGCGTTCCCCCTTCCAGCTTGTTTCG  
CGTTCTGTCCCTCCCAAGGACAC

>29

TTCGGCAAGAGGTCAGCGACAACGCAAGCTCTCTACCACGACCATGGTCCGCTTCCCC  
GACGCCCCGAGCGTTCCCCTTTCAGCTTGTTTCGCGCTTCTGTCCCTCCCAAGGACAC

TGCAGCACGAGATGGGACGGCATT

>30

GACAACGCAAGCTCTCTACCACGACCATGGTCCGCTTCCCCGACGCCCCGAGCGTTCC  
CCTTTCCAGCTTGTTTCGCGCTTCTGTCCCTCCCAAGGACACTGCAGCACGAGATGGGA  
CGGCATTCTTAGGCGGCGGGAGCA

>31

TCTCTACCACGACCATGGTCCGCTTCCCCGACGCCCCGAGCGTTCCCCTTTCCAGCTTG  
TTCGCGCTTCTGTCCCTCCCAAGGACACTGCAGCACGAGATGGGACGGCATTCTTAGG  
CGGCGGGAGCAGAAATCCTGCCT

>32

CCCTCCCAAGGACACTGCAGCACGAGATGGGACGGCATTCTTAGGCGGCGGGAGCAG  
AAATCCTGCCTGAGTCAGCGCCCGCACCTCCTCCACGCCGGCCTGAGCCAGGCCTCTG  
CAGCCCCCTTCCTCTCAGTACTCCCG

>33

CCTGCCTGAGTCAGCGCCCGCACCTCCTCCACGCCGGCCTGAGCCAGGCCTCTGCAGC  
CCCTTCCTCTCAGTACTCCCGCACCCCTCTCCCTTTTTGGTTTCTCCCACCCTGACCACC  
TGGCCGACCCGGTACCGGTGAT

>34

TCCACGCCGGCCTGAGCCAGGCCTCTGCAGCCCCTTCCTCTCAGTACTCCCGCACCCC  
TCTCCCTTTTTGGTTTCTCCCACCCTGACCACCTGGCCGACCCGGTACCGGTGATTGG  
TTCTGGTTCCGGCTTCTGCTGGG

>35

CCTTCCTCTCAGTACTCCCGCACCCCTCTCCCTTTTTGGTTTCTCCCACCCTGACCACCT  
GGCCGACCCGGTACCGGTGATTGTTCTGGTTCCGGCTTCTGCTGGGGTTCCGGCTCC  
AGGGGCGTCCTAGTGCGGCTC

>36

TCTCAGTACTCCCGCACCCCTCTCCCTTTTTGGTTTCTCCCACCCTGACCACCTGGCCG  
ACCCGGTACCGGTGATTGTTCTGGTTCCGGCTTCTGCTGGGGTTCCGGCTCCAGGG  
GCGTCCTAGTGCGGCTCAGGGCC

>37

GTTTCTCCCACCCTGACCACCTGGCCGACCCGGTACCGGTGATTGTTCTGGTTCCGG  
CTTCTGCTGGGGTTCCGGCTCCAGGGGCGTCCTAGTGCGGCTCAGGGCCCCCGACGCC  
CTTCCGGCGCTCATCCCTTGATT

>38

CACCTGGCCGACCCGGTACCGGTGATTGTTCTGGTTCCGGCTTCTGCTGGGGTTCCG  
GCTCCAGGGGCGTCCTAGTGCGGCTCAGGGCCCCCGACGCCCTTCCGGCGCTCATCCC  
TTGATTCATCCCCTCCCCCTTCG

>39

CCCGACGCCCTTCCGGCGCTCATCCCTTGATTCATCCCCTCCCCCTTCGCCGCTCACC  
GGCCCCGGGCTGTGGCTGCGGATACCCGCGCCGTGGCAGGCGGGGGGAGGGAAGAAC  
AGAGAAGGATGCGGGCTGGCTGAG

>40

ATCCCTTGATTCATCCCCTCCCCCTTCGCCGCCTCACCGGCCCCGGGCTGTGGCTGCGG  
ATACCCGCGCCGTGGCAGGCGGGGGGAGGGAAGAACAGAGAAGGATGCGGGCTGGC

TGAGAGCGGTGGCAGGCTCCGGGCA

>41

CTGCGGATACCCGCGCCGTGGCAGGCGGGGGGAGGGAAGAACAGAGAAGGATGCGG  
GCTGGCTGAGAGCGGTGGCAGGCTCCGGGCAACTCCGGCCCTGGGTTCAGGGAGATTG  
CCTCCGCAGCCGCCCTGGCTTCCCAA

>42

GGAGGGAAGAACAGAGAAGGATGCGGGCTGGCTGAGAGCGGTGGCAGGCTCCGGGC  
AACTCCGGCCCTGGGTTCAGGGAGATTGCCTCCGCAGCCGCCCTGGCTTCCCAAATGCC  
TTCACCCGTCGCGGGCCCAGGACCAG

>43

CGGGCAACTCCGGCCCTGGGTTCAGGGAGATTGCCTCCGCAGCCGCCCTGGCTTCCCAA  
ATGCCTTACCCGTCGCGGGCCCAGGACCAGGGGGCGGAGCGCAGGTGTGCGGGGCG  
GAGAGCGTGAGCTCTGCGCGCGCGT

>44

CTCCGCAGCCGCCCTGGCTTCCCAAATGCCTTACCCGTCGCGGGCCCAGGACCAGGG  
GGCGGAGCGCAGGTGTGCGGGGCGGAGAGCGTGAGCTCTGCGCGCGCGTGACTGCG  
CCGGGCCCCCGGGGCAATGTGCGG

>45

CCGCAGCCGCCCTGGCTTCCCAAATGCCTTACCCGTCGCGGGCCCAGGACCAGGGG  
GCGGAGCGCAGGTGTGCGGGGCGGAGAGCGTGAGCTCTGCGCGCGCGTGACTGCGCC  
GGGCCCCCGGGGCAATGTGCGGCG

>46

TTCCCAAATGCCTTACCCGTCGCGGGCCCAGGACCAGGGGGCGGAGCGCAGGTGTG  
CGGGGCGGAGAGCGTGAGCTCTGCGCGCGCGTGACTGCGCCGGGCCCCCGGGGCA  
ATGTGCGGCGCCGAGTTTGGGTCCGG

>47

GCGCAGGTGTGCGGGGCGGAGAGCGTGAGCTCTGCGCGCGCGTGACTGCGCCGGGCC  
CCCCCGGGGCAATGTGCGGGCGCCGAGTTTGGGTCCGGGTAGGGGACAGGCGGTCCGG  
CGTGGGTGTTGTCCACTGGTCTATCC

>48

GGGGCGGAGAGCGTGAGCTCTGCGCGCGCGTGACTGCGCCGGGCCCCCGGGGCAA  
TGTGCGGCGCCGAGTTTGGGTCCGGGTAGGGGACAGGCGGTCCGGCGTGGGTGTGT  
CCTACTGGTCTATCCGGTACGCCTGGC

>49

CGCGTGACTGCGCCGGGCCCCCGGGGCAATGTGCGGCGCCGAGTTTGGGTCCGGG  
TAGGGGACAGGCGGTCCGGCGTGGGTGTGTCCACTGGTCTATCCGGTACGCCTGGCG  
CAGCTCCTGCCCTCAGATGCCCCGA

>50

GCCGGGCCCCCGGGGCAATGTGCGGCGCCGAGTTTGGGTCCGGGTAGGGGACAGG  
CGGTCCGGCGTGGGTGTGTCCACTGGTCTATCCGGTACGCCTGGCGCAGCTCCTGCC  
CTCAGATGCCCCGACCGAGCGGAGA

>51

CGGGCCCCCGGGGCAATGTGCGGCGCCGAGTTTGGGTCCGGGTAGGGGACAGGCG  
GTCCGGCGTGGGTGTGTCCACTGGTCTATCCGGTACGCCTGGCGCAGCTCCTGCCCTC

AGATGCCCCGACCGAGCGGAGAGT

>52

GGGGCAATGTGCGGCGCCGAGTTTGGGTCCGGGTAGGGGACAGGCGGTCCGGCGTGG  
GTGTTGTCCACTGGTCTATCCGGTACGCCTGGCGCAGCTCCTGCCCTCAGATGCCCCGA  
CCGAGCGGAGAGTCAGGAATCTTC

>53

GTGTTGTCCACTGGTCTATCCGGTACGCCTGGCGCAGCTCCTGCCCTCAGATGCCCCGA  
CCGAGCGGAGAGTCAGGAATCTTCTCCGAGGGCTGGGGGAAGCCGGCTTTCCGCACC  
TTTGAGGGACGGAGTGGCGGGATC

>54

CCGAGCGGAGAGTCAGGAATCTTCTCCGAGGGCTGGGGGAAGCCGGCTTTCCGCACC  
TTTGAGGGACGGAGTGGCGGGATCTTCGGAGCTTCCTAGAGAAGTGACCACGGCCTG  
CGCCCGGTTTGGGGCAAGCGGCTGGA

>55

GGCTGGGGGAAGCCGGCTTTCCGCACCTTTGAGGGACGGAGTGGCGGGATCTTCGGA  
GCTTCCTAGAGAAGTGACCACGGCCTGCGCCCGGTTTGGGGCAAGCGGCTGGATGGG  
ATGGCTCGGCTTCCCGAGGATCTGAC

>56

CCGCACCTTTGAGGGACGGAGTGGCGGGATCTTCGGAGCTTCCTAGAGAAGTGACCA  
CGGCCTGCGCCCGGTTTGGGGCAAGCGGCTGGATGGGATGGCTCGGCTTCCCGAGGAT  
CTGACCCCCGGCCGGAGACAAATGG

>57

CTCGGCTTCCCGAGGATCTGACCCCCGGCCGGAGACAAATGGCCCTCGCATCCTAGGA  
GCTATGCTGCCAGTTCCCTGCCCAACCCGGGACGCTCAAAGCCCCAGATACCGGGAGA  
GCTGAGCCGGGCGAGGGGCGGAGC

>58

ACCCGGGACGCTCAAAGCCCCAGATACCGGGAGAGCTGAGCCGGGCGAGGGGCGGA  
GCTCCCCTGGGGGCGTGGCCTGGGTGTGGATGGAGGCGGGGCCGCAACGCCCAGTTC  
CGCAGAGGCCGGCTACTTGCTTGCGCA

>59

GCTCAAAGCCCCAGATACCGGGAGAGCTGAGCCGGGCGAGGGGCGGAGCTCCCCTGG  
GGGCGTGGCCTGGGTGTGGATGGAGGCGGGGCCGCAACGCCCAGTTCCGCAGAGGCC  
GGCTACTTGCTTGCGCAGCACGCACG

>60

GCCGGGCGAGGGGCGGAGCTCCCCTGGGGGCGTGGCCTGGGTGTGGATGGAGGCGG  
GGCCGCAACGCCCAGTTCCGCAGAGGCCGGCTACTTGCTTGCGCAGCACGCACGGCC  
GGGGAGGGGCTGGCGGCGGCCGCGGGC

>61

CGGCTACTTGCTTGCGCAGCACGCACGGCCGGGGAGGGGCTGGCGGCGGCCGCGGGC  
GGCGGGCGGCGGAGTCGCGGGGCCTGCTCCCGCCGGCACCATGGCCAAGACCGTGGC  
CTATTTCTACGACCCCGACGTGGGCA

>62

CTGGCGGCGGCCGCGGGCGGCGGGCGGCGGAGTCGCGGGGCCTGCTCCCGCCGGCAC  
CATGGCCAAGACCGTGGCCTATTTCTACGACCCCGACGTGGGCAACTTCCACTACGGT

GAGGAAACAGGGCTATGCATGAGGG

>63

CGGCGGAGTCGCGGGGCCTGCTCCCGCCGGCACCATGGCCAAGACCGTGGCCTATTTTC  
TACGACCCCGACGTGGGCAACTTCCACTACGGTGAGGAAACAGGGCTATGCATGAGG  
GGTTGGGACACGGAGGTTTTGAGGC

>64

GTGGCCTATTTCTACGACCCCGACGTGGGCAACTTCCACTACGGTGAGGAAACAGGGC  
TATGCATGAGGGGTTGGGACACGGAGGTTTTGAGGCGGGGTTGCAACTCCAGGGGTG  
AGAGCTGACGAACTCTCTTCTCCCC

>65

CGACCCCGACGTGGGCAACTTCCACTACGGTGAGGAAACAGGGCTATGCATGAGGGG  
TTGGGACACGGAGGTTTTGAGGCGGGGTTGCAACTCCAGGGGTGAGAGCTGACGAAC  
TCTCTTCTCCCCACCCCCAGGAGCTG

>66

GGCAACTTCCACTACGGTGAGGAAACAGGGCTATGCATGAGGGGTTGGGACACGGAG  
GTTTTGAGGCGGGGTTGCAACTCCAGGGGTGAGAGCTGACGAACTCTCTTCTCCCCAC  
CCCCAGGAGCTGGACACCCTATGAA

>67

GGTGAGGAAACAGGGCTATGCATGAGGGGTTGGGACACGGAGGTTTTGAGGCGGGGT  
TGCAACTCCAGGGGTGAGAGCTGACGAACTCTCTTCTCCCCACCCCCAGGAGCTGGA  
CACCTATGAAGCCTCATCGCCTGGC

>68

TCTCTTCTCCCCACCCCCAGGAGCTGGACACCCTATGAAGCCTCATCGCCTGGCATTGA  
CCCATAGCCTGGTCTTGCATTACGGTCTCTATAAGAAGATGATCGTGAGTTCCGCCGCC  
TCGGCCGGGGGTTGGGGGGTGG

>69

CCCCAGGAGCTGGACACCCTATGAAGCCTCATCGCCTGGCATTGACCCATAGCCTGG  
TCTTGCATTACGGTCTCTATAAGAAGATGATCGTGAGTTCCGCCGCCTCGGCCGGGGGT  
TGGGGGGTGGGGCGAGCTGTGGC

>70

CCTGGTCTTGCATTACGGTCTCTATAAGAAGATGATCGTGAGTTCCGCCGCCTCGGCCG  
GGGGTTGGGGGGTGGGGCGAGCTGTGGCCGTAGGGATAGGTGGGCTGGACTGAGTGC  
ATGAAGTGCGACCCGCCCTAGAG

>71

TTACGGTCTCTATAAGAAGATGATCGTGAGTTCCGCCGCCTCGGCCGGGGGTTGGGGG  
GTGGGGCGAGCTGTGGCCGTAGGGATAGGTGGGCTGGACTGAGTGCATGAAGTGCGA  
CCCGCCCCTAGAGTATCGGGGAGCT

>72

AAGATGATCGTGAGTTCCGCCGCCTCGGCCGGGGGTTGGGGGGTGGGGCGAGCTGTG  
GCCGTAGGGATAGGTGGGCTGGACTGAGTGCATGAAGTGCGACCCGCCCTAGAGTAT  
CGGGGAGCTGGATAGAAGTCACCAG

>73

GGTGGGGCGAGCTGTGGCCGTAGGGATAGGTGGGCTGGACTGAGTGCATGAAGTGCG  
ACCCGCCCTAGAGTATCGGGGAGCTGGATAGAAGTCACCAGGAGTACCTTGAAAGTG

CAGGGTGTGGGGGTGGCGTCCTCT

>74

AGGGATAGGTGGGCTGGACTGAGTGCATGAAGTGCACCCGCCCCTAGAGTATCGGGG  
AGCTGGATAGAAGTCACCAGGAGTACCTTGAAAGTGCAGGGTGTGGGGGTGGCGTC  
CTCTGCTTAATGGAAAGTACTTTCT

>75

AGTGCATGAAGTGCACCCGCCCCTAGAGTATCGGGGAGCTGGATAGAAGTCACCAGG  
AGTACCTTGAAAGTGCAGGGTGTGGGGGTGGCGTCCTCTGCTTAATGGAAAGTACTT  
TCTCACCTCAGGTCGGCCACCCTC

>76

GAAGTGCACCCGCCCCTAGAGTATCGGGGAGCTGGATAGAAGTCACCAGGAGTACCT  
TGAAAGTGCAGGGTGTGGGGGTGGCGTCCTCTGCTTAATGGAAAGTACTTTCTCACC  
TCAGGTCGGCCACCCTCTGACTGT

>77

AGTGCACCCGCCCCTAGAGTATCGGGGAGCTGGATAGAAGTCACCAGGAGTACCTTG  
AAAGTGCAGGGTGTGGGGGTGGCGTCCTCTGCTTAATGGAAAGTACTTTCTCACCTC  
AGGTCGGCCACCCTCTGACTGTAG

>78

CCCGCCCCTAGAGTATCGGGGAGCTGGATAGAAGTCACCAGGAGTACCTTGAAAGTGC  
AGGGTGTGGGGGTGGCGTCCTCTGCTTAATGGAAAGTACTTTCTCACCTCAGGTCGG  
CCACCCTCTGACTGTAGGCACACT

>79

TGGATAGAAGTCACCAGGAGTACCTTGAAAGTGCAGGGTGTGGGGGTGGCGTCCTCT  
GCTTAATGGAAAGTACTTTCTCACCTCAGGTCGGCCACCCTCTGACTGTAGGCACACTA  
GCCCTTGGCCTAGGGTTAGCGTG

>80

GGGTGTGGGGGTGGCGTCCTCTGCTTAATGGAAAGTACTTTCTCACCTCAGGTCGGC  
CACCTCTGACTGTAGGCACACTAGCCCTTGGCCTAGGGTTAGCGTGATGTGGGGCTG  
GTTTGAAGACAGAAGGTGTGTTCC

>81

TAATGGAAAGTACTTTCTCACCTCAGGTCGGCCACCCTCTGACTGTAGGCACACTAGC  
CCTTGGCCTAGGGTTAGCGTGATGTGGGGCTGGTTTGAAGACAGAAGGTGTGTTCCCTC  
CTCTGCATTTTAGAGTGTGGATAG

>82

CCTCTGACTGTAGGCACACTAGCCCTTGGCCTAGGGTTAGCGTGATGTGGGGCTGGTTT  
GAAGACAGAAGGTGTGTTCCCTCCTCTGCATTTTAGAGTGTGGATAGGGCCTTGGCCTC  
AGGAATTAGGGTTAGGGGAGCGG

>83

TCTGACTGTAGGCACACTAGCCCTTGGCCTAGGGTTAGCGTGATGTGGGGCTGGTTTG  
AAGACAGAAGGTGTGTTCCCTCCTCTGCATTTTAGAGTGTGGATAGGGCCTTGGCCTCA  
GGAATTAGGGTTAGGGGAGCGGAT

>84

TTGGCCTAGGGTTAGCGTGATGTGGGGCTGGTTTGAAGACAGAAGGTGTGTTCCCTCCT  
CTGCATTTTAGAGTGTGGATAGGGCCTTGGCCTCAGGAATTAGGGTTAGGGGAGCGGAT

ATCACTGTATCAGGGTGTGAGGT

>85

TTGAAGACAGAAGGTGTGTTCCCTCCTCTGCATTTTAGAGTGTGGATAGGGCCTTGGCCT  
CAGGAATTAGGGTTAGGGGAGCGGATATCACTGTATCAGGGTGTGAGGTTTACCCTCA  
GTTCCCACTCCTCTTTTACCACC

>86

CTCCTCTGCATTTTAGAGTGTGGATAGGGCCTTGGCCTCAGGAATTAGGGTTAGGGGAG  
CGGATATCACTGTATCAGGGTGTGAGGTTTACCCTCAGTTCCCACTCCTCTTTTACCACC  
TTTCTTTACCTCCAAGGAGCT

>87

GAGTGTGGATAGGGCCTTGGCCTCAGGAATTAGGGTTAGGGGAGCGGATATCACTGTAT  
CAGGGTGTGAGGTTTACCCTCAGTTCCCACTCCTCTTTTACCACCTTTCTTTACCTCCA  
AGGAGCTAGGGCTCCAGGGTGG

>88

TGAGGTTTACCCTCAGTTCCCACTCCTCTTTTACCACCTTTCTTTACCTCCAAGGAGCTA  
GGGCTCCAGGGTGGAACGATGCTGCCGTCTTTGTAAATGTGTATGTGCGTGTGGAACA  
GAGGCGATATTTTAGATATTCC

>89

TTCCCACTCCTCTTTTACCACCTTTCTTTACCTCCAAGGAGCTAGGGCTCCAGGGTGGA  
ACGATGCTGCCGTCTTTGTAAATGTGTATGTGCGTGTGGAACAGAGGCGATATTTAGA  
TATTCCTTTTTTCAGCCTGGAAT

>90

CTCCTCTTTTACCACCTTTCTTTACCTCCAAGGAGCTAGGGCTCCAGGGTGGAACGATG  
CTGCCGTCTTTGTAAATGTGTATGTGCGTGTGGAACAGAGGCGATATTTTAGATATTCCT  
TTTTCAGCCTGGAATACCTCT

>91

CACCTTTCTTTACCTCCAAGGAGCTAGGGCTCCAGGGTGGAACGATGCTGCCGTCTTT  
GTAAATGTGTATGTGCGTGTGGAACAGAGGCGATATTTTAGATATTCCTTTTTTCAGCCTG  
GAATACCTCTACATGGTTCTGC

>92

TGTGTATGTGCGTGTGGAACAGAGGCGATATTTTAGATATTCCTTTTTTCAGCCTGGAATA  
CCTCTACATGGTTCTGCTTAATCGCTATCCAGTTTTTTCATCTACCAGACATACACATGCT  
GTCTTCCCAGCTTGGAATTT

>93

GAGGCGATATTTTAGATATTCCTTTTTTCAGCCTGGAATACCTCTACATGGTTCTGCTTAAT  
CGCTATCCAGTTTTTCATCTACCAGACATACACATGCTGTCTTCCCAGCTTGGAATTTAT  
GGCTGTGATATGGGATAGT

>94

GCCTGGAATACCTCTACATGGTTCTGCTTAATCGCTATCCAGTTTTTTCATCTACCAGACA  
TACACATGCTGTCTTCCCAGCTTGGAATTTATGGCTGTGATATGGGATAGTAACAGTTAA  
GCCACGCCAGGCGTGGTGGC

>95

CTTAATCGCTATCCAGTTTTTTCATCTACCAGACATACACATGCTGTCTTCCCAGCTTGGA  
ATTTATGGCTGTGATATGGGATAGTAACAGTTAAGCCACGCCAGGCGTGGTGGCCCATG

CCTGTAATCCCAGCACTTTGG

>96

TTCATCTACCAGACATACACATGCTGTCTTCCCAGCTTGGAATTTATGGCTGTGATATGG  
GATAGTAACAGTTAAGCCACGCCAGGCGTGGTGGCCCATGCCTGTAATCCCAGCACTT  
TGGGAGGTTGAAATGGGGGGGA

>97

CACATGCTGTCTTCCCAGCTTGGAATTTATGGCTGTGATATGGGATAGTAACAGTTAAGC  
CACGCCAGGCGTGGTGGCCCATGCCTGTAATCCCAGCACTTTGGGAGGTTGAAATGGG  
GGGATCGCTTGAGGCCAGGAG

>98

AGCTTGGAATTTATGGCTGTGATATGGGATAGTAACAGTTAAGCCACGCCAGGCGTGGT  
GGCCCATGCCTGTAATCCCAGCACTTTGGGAGGTTGAAATGGGGGGGATCGCTTGAGG  
CCAGGAGTTGGAGACCAGCTTGG

>99

CGTGGTGGCCCATGCCTGTAATCCCAGCACTTTGGGAGGTTGAAATGGGGGGGATCGC  
TTGAGGCCAGGAGTTGGAGACCAGCTTGGGCCACAGTGGGACCCACATCTACAAAAA  
ATAAAAATAAAAAAAGTAGCCATGT

>100

CCAGCACTTTGGGAGGTTGAAATGGGGGGGATCGCTTGAGGCCAGGAGTTGGAGACC  
AGCTTGGGCCACAGTGGGACCCACATCTACAAAAAATAAAAAAAGTAGCCAT  
GTGCGGTGGGTGTGCCTGTAGTCCC

>101

GAGGCCAGGAGTTGGAGACCAGCTTGGGCCACAGTGGGACCCACATCTACAAAAAAT  
AAAAATAAAAAAAGTAGCCATGTGCGGTGGGTGTGCCTGTAGTCCCACTACTTGGGA  
GGCCGAGGCGAGAGGATGGCTTGGG

>102

GAGTTGGAGACCAGCTTGGGCCACAGTGGGACCCACATCTACAAAAAATAAAAAATA  
AAAAAGTAGCCATGTGCGGTGGGTGTGCCTGTAGTCCCACTACTTGGGAGGCCGAGG  
CGAGAGGATGGCTTGGGCCAGGAG

>103

TGTGCGGTGGGTGTGCCTGTAGTCCCACTACTTGGGAGGCCGAGGCGAGAGGATGG  
CTTGGGCCAGGAGTTTAAAGTTACAGTGATCTATGATCAGCAGCCTGAGTTGACAGG  
GAGGACCTTGTCTCAAAGAAAAA

>104

TGGGTGTGCCTGTAGTCCCACTACTTGGGAGGCCGAGGCGAGAGGATGGCTTGGGC  
CCAGGAGTTTAAAGTTACAGTGATCTATGATCAGCAGCCTGAGTTGACAGGGAGGACC  
TTGTCTCAAAGAAAAAATAAGACA

>105

TGCCTGTAGTCCCACTACTTGGGAGGCCGAGGCGAGAGGATGGCTTGGGCCAGGA  
GTTTAAAGTTACAGTGATCTATGATCAGCAGCCTGAGTTGACAGGGAGGACCTTGTCTC  
AAAAGAAAAAATAAGACAAAACAG

>106

GAGGCCGAGGCGAGAGGATGGCTTGGGCCAGGAGTTTAAAGTTACAGTGATCTATGA  
TCAGCAGCCTGAGTTGACAGGGAGGACCTTGTCTCAAAGAAAAAATAAGACAAAAC



AGCTAAACCCAGGCTTTATGTGTTG

>107

TGGCTTGGGCCCAGGAGTTTAAAGTTACAGTGATCTATGATCAGCAGCCTGAGTTGAC  
AGGGAGGACCTTGTCTCAAAAGAAAAAATAAGACAAAACAGCTAAACCCAGGCTTTA  
TGTGTTGCTAGGGAAACTAGTGAAC

>108

GCCTGAGTTGACAGGGAGGACCTTGTCTCAAAAGAAAAAATAAGACAAAACAGCTAA  
ACCCAGGCTTTATGTGTTGCTAGGGAAACTAGTGAACAATATGAATGAATGTTTCATTGC  
TTGTGCCAAGGCACAGACAAATGG

>109

CTGAGTTGACAGGGAGGACCTTGTCTCAAAAGAAAAAATAAGACAAAACAGCTAAAC  
CCAGGCTTTATGTGTTGCTAGGGAAACTAGTGAACAATATGAATGAATGTTTCATTGCTT  
GTGCCAAGGCACAGACAAATGGAC

>110

AAATAAGACAAAACAGCTAAACCCAGGCTTTATGTGTTGCTAGGGAAACTAGTGAACA  
ATATGAATGAATGTTTCATTGCTTGTGCCAAGGCACAGACAAATGGACTGGTCATAGAAA  
AGACTGAGGTGATGTTAGTGCAG

>111

AACAGCTAAACCCAGGCTTTATGTGTTGCTAGGGAAACTAGTGAACAATATGAATGAAT  
GTTTCATTGCTTGTGCCAAGGCACAGACAAATGGACTGGTCATAGAAAAGACTGAGGTG  
ATGTTAGTGCAGGAATCTATATC

>112

TGCTAGGGAAACTAGTGAACAATATGAATGAATGTTTCATTGCTTGTGCCAAGGCACAG  
ACAAATGGACTGGTCATAGAAAAGACTGAGGTGATGTTAGTGCAGGAATCTATATCCCT  
TGAGATTGTTTGCCTGTATGTAC

>113

ACAATATGAATGAATGTTTCATTGCTTGTGCCAAGGCACAGACAAATGGACTGGTCATAG  
AAAAGACTGAGGTGATGTTAGTGCAGGAATCTATATCCCTTGAGATTGTTTGCCTGTAT  
GTACCTGTGTGCATTTTCTGGG

>114

ATGAATGAATGTTTCATTGCTTGTGCCAAGGCACAGACAAATGGACTGGTCATAGAAAA  
GACTGAGGTGATGTTAGTGCAGGAATCTATATCCCTTGAGATTGTTTGCCTGTATGTACC  
TGTGTGCATTTTCTGGGAGAAG

>115

ATGAATGTTTCATTGCTTGTGCCAAGGCACAGACAAATGGACTGGTCATAGAAAAGACT  
GAGGTGATGTTAGTGCAGGAATCTATATCCCTTGAGATTGTTTGCCTGTATGTACCTGTG  
TGCATTTTCTGGGAGAAGAAAA

>116

ACAGACAAATGGACTGGTCATAGAAAAGACTGAGGTGATGTTAGTGCAGGAATCTATA  
TCCCTTGAGATTGTTTGCCTGTATGTACCTGTGTGCATTTTCTGGGAGAAGAAAAGCTC  
TTTCTTGTGCAGTTTTCAAAGAG

>117

CATAGAAAAGACTGAGGTGATGTTAGTGCAGGAATCTATATCCCTTGAGATTGTTTGCC  
TGTATGTACCTGTGTGCATTTTCTGGGAGAAGAAAAGCTCTTCTTGTGCAGTTTTCAA

AGAGGTGTGACACATCCCCCTG

>118

CTATATCCCTTGAGATTGTTTGCCTGTATGTACCTGTGTGCATTTTCTGGGAGAAGAAAA  
GCTCTTTCTTGTGCAGTTTTTCAAAGAGGTGTGACACATCCCCCTGACCTTCCAAAGATA  
ATAAATCTTTGATTTTAATTA

>119

TCCCTTGAGATTGTTTGCCTGTATGTACCTGTGTGCATTTTCTGGGAGAAGAAAAGCTC  
TTTCTTGTGCAGTTTTTCAAAGAGGTGTGACACATCCCCCTGACCTTCCAAAGATAATAA  
ATCTTTGATTTTAATTAGAAAG

>120

AGTTTTCAAAGAGGTGTGACACATCCCCCTGACCTTCCAAAGATAATAAATCTTTGATT  
TTAATTAGAAAGTTGACATATATCCCATATATTTGATCCAGAAAGAAGATCCAGAGGAA  
AGAGGACAGAATCAGAGCTTGG

>121

AGAATCAGAGCTTGGGGAGGAGATGAGCATGGAGAGAACTGGGAATAGGAGATTCCA  
AGGAACAGGGCAGGTGGATCAGGGCTCAAAGTTGAGAAGGTACGATAGGCTGAGCTG  
GAGGTGGAAAGGAAAAGAAGTGGTCT

>122

AGGAGATGAGCATGGAGAGAACTGGGAATAGGAGATTCCAAGGAACAGGGCAGGTGG  
ATCAGGGCTCAAAGTTGAGAAGGTACGATAGGCTGAGCTGGAGGTGGAAAGGAAAAG  
AAGTGGTCTTCAGGGGGCTCATTTGT

>123

GCATGGAGAGAACTGGGAATAGGAGATTCCAAGGAACAGGGCAGGTGGATCAGGGCT  
CAAAGTTGAGAAGGTACGATAGGCTGAGCTGGAGGTGGAAAGGAAAAGAAGTGGTCT  
TCAGGGGGCTCATTTGTAATAACTTA

>124

GGAGATTCCAAGGAACAGGGCAGGTGGATCAGGGCTCAAAGTTGAGAAGGTACGATA  
GGCTGAGCTGGAGGTGGAAAGGAAAAGAAGTGGTCTTCAGGGGGCTCATTTGTAATA  
ACTTACCTGGTTAATCGGAGTCTCTC

>125

AAGTTGAGAAGGTACGATAGGCTGAGCTGGAGGTGGAAAGGAAAAGAAGTGGTCTTC  
AGGGGGCTCATTTGTAATAACTTACCTGGTTAATCGGAGTCTCTCTACTGACTTAAGGA  
TTGTGGGATGAGGGGAATGCTATG

>126

GATAGGCTGAGCTGGAGGTGGAAAGGAAAAGAAGTGGTCTTCAGGGGGCTCATTTGT  
AATAACTTACCTGGTTAATCGGAGTCTCTCTACTGACTTAAGGATTGTGGGATGAGGGG  
AATGCTATGTTTGGCTTCATATAG

>127

GTGGTCTTCAGGGGGCTCATTTGTAATAACTTACCTGGTTAATCGGAGTCTCTCTACTG  
ACTTAAGGATTGTGGGATGAGGGGAATGCTATGTTTGGCTTCATATAGTCTCCAGGACT  
GGTTCAGTATGGGTGGTCTGAG

>128

TGTAATAACTTACCTGGTTAATCGGAGTCTCTCTACTGACTTAAGGATTGTGGGATGAG  
GGGAATGCTATGTTTGGCTTCATATAGTCTCCAGGACTGGTTCAGTATGGGTGGTCTGA

GCCTGTGGAGTGGGGCTGACCC

>129

GGTTAATCGGAGTCTCTCTACTGACTTAAGGATTGTGGGATGAGGGGAATGCTATGTTT  
GGCTTCATATAGTCTCCAGGACTGGTTCAGTATGGGTGGTCTGAGCCTGTGGAGTGGG  
GCTGACCCTGCCTGGGTTCATCT

>130

CTTAAGGATTGTGGGATGAGGGGAATGCTATGTTTGGCTTCATATAGTCTCCAGGACTG  
GTTTCAGTATGGGTGGTCTGAGCCTGTGGAGTGGGGCTGACCCTGCCTGGGTTCATCTT  
GTGTATCCATCCCGAGGTCTTCA

>131

AAGGATTGTGGGATGAGGGGAATGCTATGTTTGGCTTCATATAGTCTCCAGGACTGGTT  
CAGTATGGGTGGTCTGAGCCTGTGGAGTGGGGCTGACCCTGCCTGGGTTCATCTTGTG  
TATCCATCCCGAGGTCTTCAAGC

>132

GGATGAGGGGAATGCTATGTTTGGCTTCATATAGTCTCCAGGACTGGTTCAGTATGGGT  
GGTCTGAGCCTGTGGAGTGGGGCTGACCCTGCCTGGGTTCATCTTGTGTATCCATCCCG  
AGGTCTTCAAGCCATAACCAGGC

>133

TTCATATAGTCTCCAGGACTGGTTCAGTATGGGTGGTCTGAGCCTGTGGAGTGGGGCTG  
ACCCTGCCTGGGTTCATCTTGTGTATCCATCCCGAGGTCTTCAAGCCATAACCAGGCCTC  
CCAGCATGACATGTGCCGCTTC

>134

AGTATGGGTGGTCTGAGCCTGTGGAGTGGGGCTGACCCTGCCTGGGTTCATCTTGTGTA  
TCCATCCCGAGGTCTTCAAGCCATAACCAGGCCTCCAGCATGACATGTGCCGCTTCCAC  
TCCGAGGACTACATTGACTTCC

>135

CCCTGCCTGGGTTCATCTTGTGTATCCATCCCGAGGTCTTCAAGCCATAACCAGGCCTCC  
CAGCATGACATGTGCCGCTTCCACTCCGAGGACTACATTGACTTCCTGCAGAGAGTCA  
GCCCCACCAATATGCAAGGCTTC

>136

GCCATAACCAGGCCTCCAGCATGACATGTGCCGCTTCCACTCCGAGGACTACATTGACT  
TCCTGCAGAGAGTCAGCCCCACCAATATGCAAGGCTTCACCAAGAGTCTTAATGCCTT  
CAACGTAGGCGATGACTGGTGAG

>137

TTCCACTCCGAGGACTACATTGACTTCCTGCAGAGAGTCAGCCCCACCAATATGCAAG  
GCTTCACCAAGAGTCTTAATGCCTTCAACGTAGGCGATGACTGGTGAGGGAGGACTGG  
GAGTTTTGATGTCTAACAGTTTAA

>138

CATTGACTTCCTGCAGAGAGTCAGCCCCACCAATATGCAAGGCTTCACCAAGAGTCTT  
AATGCCTTCAACGTAGGCGATGACTGGTGAGGGAGGACTGGGAGTTTTGATGTCTAAC  
AGTTTAATGCCAAGCCCTTCAGTG

>139

AATATGCAAGGCTTCACCAAGAGTCTTAATGCCTTCAACGTAGGCGATGACTGGTGAG  
GGAGGACTGGGAGTTTTGATGTCTAACAGTTTAATGCCAAGCCCTTCAGTGAGGTCTT

TTGGCAGCAGTGGGAAGATCTCAA

>140

CCAAGAGTCTTAATGCCTTCAACGTAGGCGATGACTGGTGAGGGAGGACTGGGAGTTT  
TGATGTCTAACAGTTTAATGCCAAGCCCTTCAGTGAGGTCTTTTGGCAGCAGTGGGA  
GATCTCAAGGGGGGCCTACTTGTC

>141

AACGTAGGCGATGACTGGTGAGGGAGGACTGGGAGTTTTGATGTCTAACAGTTTAATG  
CCAAGCCCTTCAGTGAGGTCTTTTGGCAGCAGTGGGAAGATCTCAAGGGGGGCCTACT  
TGTCATGCATCATAATTCATTTT

>142

AGGCGATGACTGGTGAGGGAGGACTGGGAGTTTTGATGTCTAACAGTTTAATGCCAAG  
CCCTTCAGTGAGGTCTTTTGGCAGCAGTGGGAAGATCTCAAGGGGGGCCTACTTGTC  
ATGCATCATAATTCATTTTATTTG

>143

ACAGTTTAATGCCAAGCCCTTCAGTGAGGTCTTTTGGCAGCAGTGGGAAGATCTCAAG  
GGGGGCCTACTTGTCATGCATCATAATTCATTTTATTTGTTTATTCAATAAATATTTATTG  
GTCACTTGTTCTAGGCAGGC

>144

GGTCTTTTGGCAGCAGTGGGAAGATCTCAAGGGGGGCCTACTTGTCATGCATCATAAT  
TCATTTTATTTGTTTATTCAATAAATATTTATTGGTCACTTGTTCTAGGCAGGCCCTGTGC  
TAAGTGCTGGGAATGCAGTG

>145

ATCTCAAGGGGGGCCTACTTGTCATGCATCATAATTCATTTTATTTGTTTATTCAATAAA  
TATTTATTGGTCACTTGTTCTAGGCAGGCCCTGTGCTAAGTGCTGGGAATGCAGTGATG  
AACAAAAACAAAATTTTAAT

>146

GGGGGGCCTACTTGTCATGCATCATAATTCATTTTATTTGTTTATTCAATAAATATTTATT  
GGTCACTTGTTCTAGGCAGGCCCTGTGCTAAGTGCTGGGAATGCAGTGATGAACAAAA  
ACAAAATTTTAATATCGTAT

>147

AATGCATCATAATTCATTTTATTTGTTTATTCAATAAATATTTATTGGTCACTTGTTCTAGG  
CAGGCCCTGTGCTAAGTGCTGGGAATGCAGTGATGAACAAAAACAAAATTTTAATATC  
GTATTTTGTCTAAGTCTTAT

>148

CATAATTCATTTTATTTGTTTATTCAATAAATATTTATTGGTCACTTGTTCTAGGCAGGCCC  
TGTGCTAAGTGCTGGGAATGCAGTGATGAACAAAAACAAAATTTTAATATCGTATTTTT  
GCTAAGTCTTATAAAGAGG

>149

ACTTGTTCTAGGCAGGCCCTGTGCTAAGTGCTGGGAATGCAGTGATGAACAAAAACAA  
AATTTTAATATCGTATTTTTGCTAAGTCTTATAAAGAGGAGGTGTATGACAGATTATGAG  
AGTGTATACGTGGAGGATTGTT

>150

AGGCCCTGTGCTAAGTGCTGGGAATGCAGTGATGAACAAAAACAAAATTTTAATATCG  
TATTTTTGCTAAGTCTTATAAAGAGGAGGTGTATGACAGATTATGAGAGTGTATACGTGG

AGGATTGTTTAGCTTGGTGGAG

>151

GCTGGGAATGCAGTGATGAACAAAAACAAAATTTTAATATCGTATTTTTGCTAAGTCTTA  
TAAAGAGGAGGTGTATGACAGATTATGAGAGTGTATACGTGGAGGATTGTTTAGCTTGG  
TGGAGTGGCTGGTCGGTGGGG

>152

AAAACAAAATTTTAATATCGTATTTTTGCTAAGTCTTATAAAGAGGAGGTGTATGACAGA  
TTATGAGAGTGTATACGTGGAGGATTGTTTAGCTTGGTGGAGTGGCTGGTCGGTGGGG  
CCTTCCTAGAGGAAGTAAAGAT

>153

AAATTTTAATATCGTATTTTTGCTAAGTCTTATAAAGAGGAGGTGTATGACAGATTATGA  
GAGTGTATACGTGGAGGATTGTTTAGCTTGGTGGAGTGGCTGGTCGGTGGGGCCTTCCT  
AGAGGAAGTAAAGATTGAGCT

>154

ATCGTATTTTTGCTAAGTCTTATAAAGAGGAGGTGTATGACAGATTATGAGAGTGTATAC  
GTGGAGGATTGTTTAGCTTGGTGGAGTGGCTGGTCGGTGGGGCCTTCCTAGAGGAAGT  
AAAGATTGAGCTGAGATCTGAA

>155

AGTCTTATAAAGAGGAGGTGTATGACAGATTATGAGAGTGTATACGTGGAGGATTGTTT  
AGCTTGGTGGAGTGGCTGGTCGGTGGGGCCTTCCTAGAGGAAGTAAAGATTGAGCTG  
AGATCTGAAAAAAGAGTAGAAGTA

>156

ATGAGAGTGTATACGTGGAGGATTGTTTAGCTTGGTGGAGTGGCTGGTCGGTGGGGCC  
TTCCTAGAGGAAGTAAAGATTGAGCTGAGATCTGAAAAAAGAGTAGAAGTAATCAGAT  
GAAAGATGGTTGGAGGGTGAGGGG

>157

CTTGGTGGAGTGGCTGGTCGGTGGGGCCTTCCTAGAGGAAGTAAAGATTGAGCTGAGA  
TCTGAAAAAAGAGTAGAAGTAATCAGATGAAAGATGGTTGGAGGGTGAGGGGAGAAG  
TATAGCAGGCAGTAGGGACAAGTGC

>158

GGAGTGGCTGGTCGGTGGGGCCTTCCTAGAGGAAGTAAAGATTGAGCTGAGATCTGA  
AAAAAGAGTAGAAGTAATCAGATGAAAGATGGTTGGAGGGTGAGGGGAGAAGTATAG  
CAGGCAGTAGGGACAAGTGCTAAGGG

>159

TAGAGGAAGTAAAGATTGAGCTGAGATCTGAAAAAAGAGTAGAAGTAATCAGATGAA  
AGATGGTTGGAGGGTGAGGGGAGAAGTATAGCAGGCAGTAGGGACAAGTGCTAAGGG  
TCTGTGGTAGGACTGAGTATGACTCA

>160

AGATTGAGCTGAGATCTGAAAAAAGAGTAGAAGTAATCAGATGAAAGATGGTTGGAG  
GGTGAGGGGAGAAGTATAGCAGGCAGTAGGGACAAGTGCTAAGGGTCTGTGGTAGGA  
CTGAGTATGACTCATTTGAGGAACAG

>161

GATCTGAAAAAAGAGTAGAAGTAATCAGATGAAAGATGGTTGGAGGGTGAGGGGAGA  
AGTATAGCAGGCAGTAGGGACAAGTGCTAAGGGTCTGTGGTAGGACTGAGTATGACTC

ATTTGAGGAACAGAAAAAAGGCCAA

>162

AGATGAAAGATGGTTGGAGGGTGAGGGGAGAAGTATAGCAGGCAGTAGGGACAAGTG  
CTAAGGGTCTGTGGTAGGACTGAGTATGACTCATTGAGGAACAGAAAAAAGGCCAA  
GTGCAGAGTATGAAGAGGAGGTGAAC

>163

TGGTTGGAGGGTGAGGGGAGAAGTATAGCAGGCAGTAGGGACAAGTGCTAAGGGTCT  
GTGGTAGGACTGAGTATGACTCATTGAGGAACAGAAAAAAGGCCAAGTGCAGAGTA  
TGAAGAGGAGGTGAACTGAATTGAGG

>164

GTAGGGACAAGTGCTAAGGGTCTGTGGTAGGACTGAGTATGACTCATTGAGGAACAG  
AAAAAAGGCCAAGTGCAGAGTATGAAGAGGAGGTGAACTGAATTGAGGCTAAAGAAA  
TAGGACCTTTTAAAAGCAAACAGCT

>165

CAAGTGCTAAGGGTCTGTGGTAGGACTGAGTATGACTCATTGAGGAACAGAAAAAA  
GGCCAAGTGCAGAGTATGAAGAGGAGGTGAACTGAATTGAGGCTAAAGAAATAGGAC  
CTTTTAAAAGCAAACAGCTCTATTAT

>166

AGGAGGTGAACTGAATTGAGGCTAAAGAAATAGGACCTTTTAAAAGCAAACAGCTCTA  
TTATGAATTGGGGTTTTTACCCGTAGAGTATAGGGAAGCTATCAAAGTGTTTTAAAAAG  
CAAGGGATCTTAAGAGGGCTATG

>167

CTGAATTGAGGCTAAAGAAATAGGACCTTTTAAAAGCAAACAGCTCTATTATGAATTGG  
GGTTTTTACCCGTAGAGTATAGGGAAGCTATCAAAGTGTTTTAAAAAGCAAGGGATCTT  
AAGAGGGCTATGGGCAAGTTAA

>168

ACCTTTTAAAAGCAAACAGCTCTATTATGAATTGGGGTTTTTACCCGTAGAGTATAGGG  
AAGCTATCAAAGTGTTTTTAAAAAGCAAGGGATCTTAAGAGGGCTATGGGCAAGTTAAA  
AAAACAAAAAAAACAACGAAGGA

>169

TACCCGTAGAGTATAGGGAAGCTATCAAAGTGTTTTTAAAAAGCAAGGGATCTTAAGAG  
GGCTATGGGCAAGTTAAAAAAACAAAAAAAACAACGAAGGAGTGGTTTGATATCATT  
GGTTTACATTGAGCTTGTATCATC

>170

GTGTTTTTAAAAGCAAGGGATCTTAAGAGGGCTATGGGCAAGTTAAAAAAACAAAAA  
AAACAACGAAGGAGTGGTTTGATATCATTAGGTTTACATTGAGCTTGTATCATCCATAG  
AAGAGTCAGGGTTAGACCCTCTGG

>171

GATCTTAAGAGGGCTATGGGCAAGTTAAAAAAACAAAAAAAACAACGAAGGAGTGGT  
TTGATATCATTAGGTTTACATTGAGCTTGTATCATCCATAGAAGAGTCAGGGTTAGACCC  
TCTGGGGAAGAGAGTGGACAACA

>172

ATGGGCAAGTTAAAAAAACAAAAAAAACAACGAAGGAGTGGTTTGATATCATTAGGTT  
TACATTGAGCTTGTATCATCCATAGAAGAGTCAGGGTTAGACCCTCTGGGGAAGAGAG

TGGACAACAAAGATAAGCCACACT

>173

ACAAAAAAAAACAACGAAGGAGTGGTTTGATATCATTAGGTTTACATTGAGCTTGTATCA  
TCCATAGAAGAGTCAGGGTTAGACCCTCTGGGGAAGAGAGTGGACAACAAAGATAAG  
CCACACTCTACTCTATATCCATGA

>174

ATATCATTAGGTTTACATTGAGCTTGTATCATCCATAGAAGAGTCAGGGTTAGACCCTCT  
GGGGAAGAGAGTGGACAACAAAGATAAGCCACACTCTACTCTATATCCATGAAAAAAT  
AGTAACCATCACAGCTACCAGT

>175

TTAGACCCTCTGGGGAAGAGAGTGGACAACAAAGATAAGCCACACTCTACTCTATATC  
CATGAAAAAATAGTAACCATCACAGCTACCAGTTGCTCAATTCTACTTACTTTTGTTTTT  
AAACTTTTTATTAGGGAAAAAT

>176

GAGTGGACAACAAAGATAAGCCACACTCTACTCTATATCCATGAAAAAATAGTAACCAT  
CACAGCTACCAGTTGCTCAATTCTACTTACTTTTGTTTTTTAAACTTTTTATTAGGGAAAA  
TTTCAAAAATTTCTGAAAGTG

>177

CACTCTACTCTATATCCATGAAAAAATAGTAACCATCACAGCTACCAGTTGCTCAATTCT  
ACTTACTTTTGTTTTTTAAACTTTTTATTAGGGAAAAATTTCAAAAATTTCTGAAAGTGAAG  
TAGTGCAGTGACCTCCATA

>178

CCAGTTGCTCAATTCTACTTACTTTTGTTTTTTAAACTTTTTATTAGGGAAAAATTTCAAAA  
ATTTCTGAAAGTGAAGTAGTGCAGTGACCTCCCATACGTCCATCACCTAGCTTCAACGC  
TTATGAGCAAATGGCCACTCT

>179

TGCTCAATTCTACTTACTTTTGTTTTTTAAACTTTTTATTAGGGAAAAATTTCAAAAATTTCT  
GAAAGTGAAGTAGTGCAGTGACCTCCCATACGTCCATCACCTAGCTTCAACGCTTATGA  
GCAAATGGCCACTCTTTTTT

>180

CCATCACCTAGCTTCAACGCTTATGAGCAAATGGCCACTCTTTTTTTTTTTTTTTTTTTTTT  
TGAGACAGAGTCTCACTCTGTAGCCCAGGCTGGAGTGCAGTGGTGCAGTCTTGGCTCA  
CTGCAACCTCTGCCTCCTGGG

>181

GCTTCAACGCTTATGAGCAAATGGCCACTCTTTTTTTTTTTTTTTTTTTTTTTTGAGACAGA  
GTCTCACTCTGTAGCCCAGGCTGGAGTGCAGTGGTGCAGTCTTGGCTCACTGCAACCT  
CTGCCTCCTGGGTTCAAGCGAT

>182

AGCAAATGGCCACTCTTTTTTTTTTTTTTTTTTTTTTTTGAGACAGAGTCTCACTCTGTAGC  
CCAGGCTGGAGTGCAGTGGTGCAGTCTTGGCTCACTGCAACCTCTGCCTCCTGGGTTT  
AAGCGATTCTCATGCCTCAGAC

>183

TCTTTTTTTTTTTTTTTTTTTTTTTTGAGACAGAGTCTCACTCTGTAGCCCAGGCTGGAGTG  
CAGTGGTGCAGTCTTGGCTCACTGCAACCTCTGCCTCCTGGGTTCAAGCGATTCTCATG

CCTCAGACTCCCGAGTAGCTG

>184

AGTCTCACTCTGTAGCCCAGGCTGGAGTGCAGTGGTGCAGTCTTGGCTCACTGCAACC  
TCTGCCTCCTGGGTTCAAGCGATTCTCATGCCTCAGACTCCCGAGTAGCTGGGATTACA  
GGCGCCTGCCACCATGCCTGGCT

>185

TGGTGCAGTCTTGGCTCACTGCAACCTCTGCCTCCTGGGTTCAAGCGATTCTCATGCCT  
CAGACTCCCGAGTAGCTGGGATTACAGGCGCCTGCCACCATGCCTGGCTAATTTTTGTA  
TGTTTAGTAGAGATGGGGTTTC

>186

CGATTCTCATGCCTCAGACTCCCGAGTAGCTGGGATTACAGGCGCCTGCCACCATGCCT  
GGCTAATTTTTGTATGTTTAGTAGAGATGGGGTTTCACTATGTTGGTCAAGCTGGTTTTG  
AACTCCCGACCTCAGGTGATT

>187

TCTCATGCCTCAGACTCCCGAGTAGCTGGGATTACAGGCGCCTGCCACCATGCCTGGCT  
AATTTTTGTATGTTTAGTAGAGATGGGGTTTCACTATGTTGGTCAAGCTGGTTTTGAACT  
CCCGACCTCAGGTGATTACAC

>188

ATTACAGGCGCCTGCCACCATGCCTGGCTAATTTTTGTATGTTTAGTAGAGATGGGGTTT  
CACTATGTTGGTCAAGCTGGTTTTGAACTCCCGACCTCAGGTGATTACACAGCCTCAGC  
CTCCAAAAGTGCTGGGATTAC

>189

GCCTGCCACCATGCCTGGCTAATTTTTGTATGTTTAGTAGAGATGGGGTTTCACTATGTT  
GGTCAAGCTGGTTTTGAACTCCCGACCTCAGGTGATTACACAGCCTCAGCCTCCAAAA  
GTGCTGGGATTACAGACGTGAG

>190

ATTTTTGTATGTTTAGTAGAGATGGGGTTTCACTATGTTGGTCAAGCTGGTTTTGAACTC  
CCGACCTCAGGTGATTACACAGCCTCAGCCTCCAAAAGTGCTGGGATTACAGACGTGA  
GCCATCGCACTCAGCTGAGCAA

>191

TTTCACTATGTTGGTCAAGCTGGTTTTGAACTCCCGACCTCAGGTGATTACACAGCCTC  
AGCCTCCAAAAGTGCTGGGATTACAGACGTGAGCCATCGCACTCAGCTGAGCAAGTG  
GCCACTCTTACTTCATCTATACTC

>192

AGCTGGTTTTGAACTCCCGACCTCAGGTGATTACACAGCCTCAGCCTCCAAAAGTGCT  
GGGATTACAGACGTGAGCCATCGCACTCAGCTGAGCAAGTGGCCACTCTTACTTCATCT  
ATACTCCCTCATGTTAGATTGTT

>193

GTGATTACACAGCCTCAGCCTCCAAAAGTGCTGGGATTACAGACGTGAGCCATCGCAC  
TCAGCTGAGCAAGTGGCCACTCTTACTTCATCTATACTCCCTCATGTTAGATTGTTTTAA  
AGCAGATCCTAGATGTTATATC

>194

GGATTACAGACGTGAGCCATCGCACTCAGCTGAGCAAGTGGCCACTCTTACTTCATCTA  
TACTCCCTCATGTTAGATTGTTTTAAAGCAGATCCTAGATGTTATATCCTTTTATCCATAA



ATATTTTATTATGTATCTCT

>195

GACGTGAGCCATCGCACTCAGCTGAGCAAGTGGCCACTCTTACTTCATCTATACTCCCT  
CATGTTAGATTGTTTTAAAGCAGATCCTAGATGTTATATCCTTTTATCCATAAATATTTTAT  
TATGTATCTCTAAATGATA

>196

CTGAGCAAGTGGCCACTCTTACTTCATCTATACTCCCTCATGTTAGATTGTTTTAAAGCA  
GATCCTAGATGTTATATCCTTTTATCCATAAATATTTTATTATGTATCTCTAAATGATACTCT  
TTTAAAAAACATAGTA

>197

TCCCTCATGTTAGATTGTTTTAAAGCAGATCCTAGATGTTATATCCTTTTATCCATAAATAT  
TTTATTATGTATCTCTAAATGATACTCTTTTAAAAAACATAGTATCATTATCAAACCTAA  
AAAGTTAACAGTGATTC

>198

GATGTTATATCCTTTTATCCATAAATATTTTATTATGTATCTCTAAATGATACTCTTTTAAAA  
AACATAGTATCATTATCAAACCTAAAAAGTTAACAGTGATTCCCTTAATGTCATCAAATA  
TGGATCAATATTCAAAT

>199

AAATATTTTATTATGTATCTCTAAATGATACTCTTTTAAAAAACATAGTATCATTATCAA  
ACCTAAAAAGTTAACAGTGATTCCCTTAATGTCATCAAATATGGATCAATATTCAAATTC  
TGCAGTTGTCTCATAATTA

>200

TTATTATGTATCTCTAAATGATACTCTTTTAAAAAACATAGTATCATTATCAAACCTAAA  
AAGTTAACAGTGATTCCCTTAATGTCATCAAATATGGATCAATATTCAAATTTCTGCAGTT  
GTCTCATAATTATTTTGTGA

>201

CTAAATGATACTCTTTTAAAAAACATAGTATCATTATCAAACCTAAAAAGTTAACAGTG  
ATTCCTTAATGTCATCAAATATGGATCAATATTCAAATTTCTGCAGTTGTCTCATAATTAT  
TTTGTAGCTAATTTAAATC

>202

TATCAAACCTAAAAAGTTAACAGTGATTCCCTTAATGTCATCAAATATGGATCAATATTCA  
AATTTCTGCAGTTGTCTCATAATTATTTGTAGCTAATTTAAATCCAGATCTAAACAAGG  
TCTATACAGTGCATTTGGTT

>203

CAAACCTAAAAAGTTAACAGTGATTCCCTTAATGTCATCAAATATGGATCAATATTCAAAT  
TTCTGCAGTTGTCTCATAATTATTTGTAGCTAATTTAAATCCAGATCTAAACAAGGTCTA  
TACAGTGCATTTGGTTGAT

>204

ACAGTGATTCCCTTAATGTCATCAAATATGGATCAATATTCAAATTTCTGCAGTTGTCTCAT  
AATTATTTTGTAGCTAATTTAAATCCAGATCTAAACAAGGTCTATACAGTGCATTTGGTT  
GATATGTCTCTTAAGACTT

>205

ATCAATATTCAAATTTCTGCAGTTGTCTCATAATTATTTTGTAGCTAATTTAAATCCAGAT  
CTAAACAAGGTCTATACAGTGCATTTGGTTGATATGTCTCTTAAGACTTTTAATTTGTAG

CTTTTCTGTCACCCCCTTG

>206

CAAATTTCTGCAGTTGTCTCATAATTATTTTGTAGCTAATTTAAATCCAGATCTAAACAA  
GGTCTATACAGTGCATTTGGTTGATATGTCTCTTAAGACTTTTAATTTGTAGCTTTTCTGT  
CACCCCCTTGAATTTATTT

>207

GCAGTTGTCTCATAATTATTTTGTAGCTAATTTAAATCCAGATCTAAACAAGGTCTATAC  
AGTGCATTTGGTTGATATGTCTCTTAAGACTTTTAATTTGTAGCTTTTCTGTCACCCCCTT  
GAATTTATTTCTTGAAGAA

>208

CTCATAATTATTTTGTAGCTAATTTAAATCCAGATCTAAACAAGGTCTATACAGTGCATTT  
GGTTGATATGTCTCTTAAGACTTTTAATTTGTAGCTTTTCTGTCACCCCCTTGAATTTATT  
TCTTGAAGAAACCAGGTT

>209

ATTTAAATCCAGATCTAAACAAGGTCTATACAGTGCATTTGGTTGATATGTCTCTTAAGA  
CTTTTAATTTGTAGCTTTTCTGTCACCCCCTTGAATTTATTTCTTGAAGAAACCAGGTTG  
TTGATCCTGTAGAATTTCTT

>210

TATGTCTCTTAAGACTTTTAATTTGTAGCTTTTCTGTCACCCCCTTGAATTTATTTCTTGA  
AGAAACCAGGTTGTTGATCCTGTAGAATTTCTTATGATAGCTACCATTTACTGAGTGCTT  
ACTCTGCTAGGTATTATGC

>211

GTCTCTTAAGACTTTTAATTTGTAGCTTTTCTGTCACCCCCTTGAATTTATTTCTTGAAG  
AAACCAGGTTGTTGATCCTGTAGAATTTCTTATGATAGCTACCATTTACTGAGTGCTTAC  
TCTGCTAGGTATTATGCCAA

>212

TGAATTTATTTCTTGAAGAAACCAGGTTGTTGATCCTGTAGAATTTCTTATGATAGCTAC  
CATTTACTGAGTGCTTACTCTGCTAGGTATTATGCCAAGGGTTGCTGGTAAATCCACTTA  
ATTCTCATACCAATCCTTAG

>213

AGAAACCAGGTTGTTGATCCTGTAGAATTTCTTATGATAGCTACCATTTACTGAGTGCTT  
ACTCTGCTAGGTATTATGCCAAGGGTTGCTGGTAAATCCACTTAATTCTCATACCAATCC  
TTAGATGTATTATAATAGAC

>214

GTAGAATTTCTTATGATAGCTACCATTTACTGAGTGCTTACTCTGCTAGGTATTATGCCAA  
GGGTTGCTGGTAAATCCACTTAATTCTCATACCAATCCTTAGATGTATTATAATAGACCTT  
TTTCTGATGTTATATATA

>215

GCTTACTCTGCTAGGTATTATGCCAAGGGTTGCTGGTAAATCCACTTAATTCTCATACCA  
ATCCTTAGATGTATTATAATAGACCTTTTCTGATGTTATATATAAGTAAATTGAGGTTTG  
GGAATATCTAGGTAACCTTA

>216

AGGGTTGCTGGTAAATCCACTTAATTCTCATACCAATCCTTAGATGTATTATAATAGACCT  
TTTTCTGATGTTATATATAAGTAAATTGAGGTTTGGGAATATCTAGGTAACCTTAGCCGTAG

TCACATAACTGGTCATTG

>217

TAAATCCACTTAATTCTCATACCAATCCTTAGATGTATTATAATAGACCTTTTTCTGATGTT  
ATATATAAGTAAATTGAGGTTTGGGAATATCTAGGTAAGTCCGTAGTCACATAACTG  
GTCATTGGAGGGGGCATG

>218

TAATTCTCATACCAATCCTTAGATGTATTATAATAGACCTTTTTCTGATGTTATATATAAGT  
AAATTGAGGTTTGGGAATATCTAGGTAAGTCCGTAGTCACATAACTGGTCATTGGA  
GGGGGCATGATCCAGATCC

>219

CCTTAGATGTATTATAATAGACCTTTTTCTGATGTTATATATAAGTAAATTGAGGTTTGGG  
AATATCTAGGTAAGTCCGTAGTCACATAACTGGTCATTGGAGGGGGCATGATCCAG  
ATCCCGGGTTTTTAAACCAC

>220

TTCTGATGTTATATATAAGTAAATTGAGGTTTGGGAATATCTAGGTAAGTCCGTAGT  
CACATAACTGGTCATTGGAGGGGGCATGATCCAGATCCCGGGTTTTTAAACCACTAATC  
TGTTTTCTGAAAGATCTTAA

>221

TGGGAATATCTAGGTAAGTCCGTAGTCACATAACTGGTCATTGGAGGGGGCATGAT  
CCAGATCCCGGGTTTTTAAACCACTAATCTGTTTTCTGAAAGATCTTAATGACAGAAG  
CAGCCAGGGCTGTAGGATAGAG

>222

TAGCCGTAGTCACATAACTGGTCATTGGAGGGGGCATGATCCAGATCCCGGGTTTTTAA  
ACCACTAATCTGTTTTCTGAAAGATCTTAATGACAGAAGCAGCCAGGGCTGTAGGATA  
GAGGCCAACTCATTAGGCTGGC

>223

CCAGATCCCGGGTTTTTAAACCACTAATCTGTTTTCTGAAAGATCTTAATGACAGAAG  
CAGCCAGGGCTGTAGGATAGAGGCCAACTCATTAGGCTGGCATTGGCACCTTTCCAAC  
TTTATCCCTACACCTCAGCTGCA

>224

TTCAAGGCCTTCTCAGCCTTCACACCATCTCCATGAAACCTTTCTTGACCACACCAGCC  
CATAGAGCTCTGTCTTGACACACTGCACTGCTCATTGGTGTTTCAGTCACATGCTGTT  
TGGGGAGGTTTCTTGTTTTTTT

>225

CTCCATGAAACCTTTCTTGACCACACCAGCCCATAGAGCTCTGTCTTGACACACTGCA  
CTGCTCATTGGTGTTTCAGTCACATGCTGTTTGGGGAGGTTTCTTGTTTTTTTGTTAGTA  
TTCCTGCTGTTATTTCTGAGC

>226

AAACCTTTCTTGACCACACCAGCCCATAGAGCTCTGTCTTGACACACTGCACTGCTCA  
TTTGGTGTTTCAGTCACATGCTGTTTGGGGAGGTTTCTTGTTTTTTTGTTAGTATTCCTGC  
TGTTATTTCTGAGCTCACTT

>227

TGACCACACCAGCCCATAGAGCTCTGTCTTGACACACTGCACTGCTCATTGGTGTTTC  
AGTCACATGCTGTTTGGGGAGGTTTCTTGTTTTTTTGTTAGTATTCCTGCTGTTATTTCT

GAGCTCACTTTCTAGCTCTGT

>228

AGCCCATAGAGCTCTGTCTTGACACACTGCACTGCTCATTGGTGTTTCAGTCACATGC  
TGTTTGGGGAGGTTTCTTGTTTTTTTGTAGTATTCCTGCTGTTATTTCTGAGCTCACTTT  
CTAGCTCTGTGAATACAGGG

>229

GTCTTGACACACTGCACTGCTCATTGGTGTTTCAGTCACATGCTGTTTGGGGAGGTTT  
CTTGTTTTTTTGTAGTATTCCTGCTGTTATTTCTGAGCTCACTTTCTAGCTCTGTGAATA  
CAGGGTCAGCCCTTACGCCA

>230

CTGTTTGGGGAGGTTTCTTGTTTTTTTGTAGTATTCCTGCTGTTATTTCTGAGCTCACTT  
TCTAGCTCTGTGAATACAGGGTCAGCCCTTACGCCACACTGGGGTCCCGTAGATGCTCT  
TTGTGCGATTAGGGAATGCT

>231

GGTTTCTTGTTTTTTTGTAGTATTCCTGCTGTTATTTCTGAGCTCACTTTCTAGCTCTGT  
GAATACAGGGTCAGCCCTTACGCCACACTGGGGTCCCGTAGATGCTCTTTGTGCGATT  
GGGAATGCTAATTAGAATAC

>232

TTCCTGCTGTTATTTCTGAGCTCACTTTCTAGCTCTGTGAATACAGGGTCAGCCCTTACG  
CCACACTGGGGTCCCGTAGATGCTCTTTGTGCGATTAGGGAATGCTAATTAGAATACTAT  
CTCTGGGCTATTTATGCTGC

>233

AGCTCACTTTCTAGCTCTGTGAATACAGGGTCAGCCCTTACGCCACACTGGGGTCCCGT  
AGATGCTCTTTGTGCGATTAGGGAATGCTAATTAGAATACTATCTCTGGGCTATTTATGCT  
GCATCAGTCTTCCTGTCAA

>234

CGTAGATGCTCTTTGTGCGATTAGGGAATGCTAATTAGAATACTATCTCTGGGCTATTTAT  
GCTGCATCAGTCTTCCTGTCAAACAAGTTACAGTTGTGCTTATCTGTATTTCCGATGAG  
AATCAGGAATTTTCTTCTG

>235

CTCTTTGTGCGATTAGGGAATGCTAATTAGAATACTATCTCTGGGCTATTTATGCTGCATC  
AGTCTTCCTGTCAAACAAGTTACAGTTGTGCTTATCTGTATTTCCGATGAGAATCAGGA  
ATTTTCTTCTGTTTAATGA

>236

CGATTAGGGAATGCTAATTAGAATACTATCTCTGGGCTATTTATGCTGCATCAGTCTTCCT  
GTCAAACAAGTTACAGTTGTGCTTATCTGTATTTCCGATGAGAATCAGGAATTTTCTTC  
TGTTTAATGAATTTCTGAT

>237

AGTCTTCCTGTCAAACAAGTTACAGTTGTGCTTATCTGTATTTCCGATGAGAATCAGGA  
ATTTTCTTCTGTTTAATGAATTTCTGATTGGTTTCAAAGTATTCTAACATAAGTAGCCAA  
ATTGTACTATAGGCCTTAA

>238

TACAGTTGTGCTTATCTGTATTTCCGATGAGAATCAGGAATTTTCTTCTGTTTAATGAAT  
TTCTGATTGGTTTCAAAGTATTCTAACATAAGTAGCCAAATTGTACTATAGGCCTTAAA

TGAAAAAATAAAAAAGTA

>239

TCCGATGAGAATCAGGAATTTTTCTTCTGTTTAATGAATTTCTGATTGGTTTCAAAGTAT  
TCTAACATAAGTAGCCAAATTGTACTATAGGCCTTTAAATGAAAAAATAAAAAAGTAG  
TCCCAAGCCGGGCGCAGTGGC

>240

TCAGGAATTTTTCTTCTGTTTAATGAATTTCTGATTGGTTTCAAAGTATTCTAACATAAGT  
AGCCAAATTGTACTATAGGCCTTTAAATGAAAAAATAAAAAAGTAGTCCCAAGCCGG  
GCGCAGTGGCTCACGCCTGTA

>241

TTGGTTTCAAAGTATTCTAACATAAGTAGCCAAATTGTACTATAGGCCTTTAAATGAAAA  
AAATAAAAAAGTAGTCCCAAGCCGGGCGCAGTGGCTCACGCCTGTAATCCCAGCACTT  
TCGGAGGCCGAGGCGGGTGGAC

>242

CATAAGTAGCCAAATTGTACTATAGGCCTTTAAATGAAAAAATAAAAAAGTAGTCCCA  
AGCCGGGCGCAGTGGCTCACGCCTGTAATCCCAGCACTTTCGGAGGCCGAGGCGGGT  
GGACCACCTAAGGTCAGGAGTTCA

>243

ATTGTACTATAGGCCTTTAAATGAAAAAATAAAAAAGTAGTCCCAAGCCGGGCGCAG  
TGGCTCACGCCTGTAATCCCAGCACTTTCGGAGGCCGAGGCGGGTGGACCACCTAAGG  
TCAGGAGTTCAAGACCAGCCTGGC

>244

AAAAAAGTAGTCCCAAGCCGGGCGCAGTGGCTCACGCCTGTAATCCCAGCACTTTCGG  
AGGCCGAGGCGGGTGGACCACCTAAGGTCAGGAGTTCAAGACCAGCCTGGCCAACAT  
GGTGAAACCCCATCTCTACTAAAAA

>245

AAGCCGGGCGCAGTGGCTCACGCCTGTAATCCCAGCACTTTCGGAGGCCGAGGCGGG  
TGGACCACCTAAGGTCAGGAGTTCAAGACCAGCCTGGCCAACATGGTGAAACCCCAT  
CTCTACTAAAAATACAAAAATTAGTC

>246

GCGCAGTGGCTCACGCCTGTAATCCCAGCACTTTCGGAGGCCGAGGCGGGTGGACCA  
CCTAAGGTCAGGAGTTCAAGACCAGCCTGGCCAACATGGTGAAACCCCATCTCTACTA  
AAAATACAAAAATTAGTCATGTGTG

>247

CAGCACTTTCGGAGGCCGAGGCGGGTGGACCACCTAAGGTCAGGAGTTCAAGACCAG  
CCTGGCCAACATGGTGAAACCCCATCTCTACTAAAAATACAAAAATTAGTCATGTGTGG  
TGGCACGTGCCTGTAGTCCCAGCT

>248

AAGGTCAGGAGTTCAAGACCAGCCTGGCCAACATGGTGAAACCCCATCTCTACTAAAA  
ATACAAAAATTAGTCATGTGTGGTGGCACGTGCCTGTAGTCCCAGCTACTCCAGGAGG  
CTGAGGCAGGAGAATTGCTTGAAC

>249

CAGGAGTTCAAGACCAGCCTGGCCAACATGGTGAAACCCCATCTCTACTAAAAATACA  
AAAATTAGTCATGTGTGGTGGCACGTGCCTGTAGTCCCAGCTACTCCAGGAGGCTGAG

GCAGGAGAATTGCTTGAACCCGGG

>250

ACCAGCCTGGCCAACATGGTGAAACCCCATCTCTACTAAAAATACAAAAATTAGTCATG  
TGTGGTGGCACGTGCCTGTAGTCCCAGCTACTCCAGGAGGCTGAGGCAGGAGAATTGC  
TTGAACCCGGGAGTTGGAGGTTG

>251

TGTGGTGGCACGTGCCTGTAGTCCCAGCTACTCCAGGAGGCTGAGGCAGGAGAATTGC  
TTGAACCCGGGAGTTGGAGGTTGCAGTGACCTGAGATTGCACCACTGCACTCCAGCCT  
GGGCAACAGAGTGAGACTCTGTCT

>252

GCACGTGCCTGTAGTCCCAGCTACTCCAGGAGGCTGAGGCAGGAGAATTGCTTGAACC  
CGGGAGTTGGAGGTTGCAGTGACCTGAGATTGCACCACTGCACTCCAGCCTGGGCAA  
CAGAGTGAGACTCTGTCTTAAAAA

>253

GCTTGAACCCGGGAGTTGGAGGTTGCAGTGACCTGAGATTGCACCACTGCACTCCAG  
CCTGGGCAACAGAGTGAGACTCTGTCTTAAAAAAAAAAAAAAAAAAAAAATTCCAGAC  
CTCTCCTTTTCACCCATAAATCCCTC

>254

GGGAGTTGGAGGTTGCAGTGACCTGAGATTGCACCACTGCACTCCAGCCTGGGCAAC  
AGAGTGAGACTCTGTCTTAAAAAAAAAAAAAAAAAAAAAATTCCAGACCTCTCCTTTTC  
ACCCATAAATCCCTCTGCCCAGTGA

>255

CTCTGTCTTAAAAAAAAAAAAAAAAAAAAAATTCCAGACCTCTCCTTTTCACCCATAAA  
TCCCTCTGCCCAGTGACAGCCACTTTCAGCTCCTTTCCCCTATGTCTTCTGGTATTTACC  
TTTGGATTTCTAAATAATAATA

>256

TCCAGACCTCTCCTTTTCACCCATAAATCCCTCTGCCCAGTGACAGCCACTTTCAGCTC  
CTTTCCCCTATGTCTTCTGGTATTTACCTTTGGATTTCTAAATAATAATAATATTAATTGAC  
TGTTATTACTAATCTGTAA

>257

TCTCCTTTTCACCCATAAATCCCTCTGCCCAGTGACAGCCACTTTCAGCTCCTTTCCCCT  
ATGTCTTCTGGTATTTACCTTTGGATTTCTAAATAATAATAATATTAATTGACTGTTATTAC  
TAATCTGTAATCCTTAGG

>258

CTATGTCTTCTGGTATTTACCTTTGGATTTCTAAATAATAATAATATTAATTGACTGTTATT  
ACTAATCTGTAATCCTTAGGTAATACCTGTTATATACTAGGTACTGTTCTAAGTGCTTTAC  
AGCCATTAGCTTATTTA

>259

GGTATTTACCTTTGGATTTCTAAATAATAATAATATTAATTGACTGTTATTACTAATCTGTA  
ATCCTTAGGTAATACCTGTTATATACTAGGTACTGTTCTAAGTGCTTTACAGCCATTAGCT  
TATTTAATCTCAACAAC

>260

AAATAATAATAATATTAATTGACTGTTATTACTAATCTGTAATCCTTAGGTAATACCTGTTA  
TATACTAGGTACTGTTCTAAGTGCTTTACAGCCATTAGCTTATTTAATCTCAACAACCCCT

ATGAAGCAGGGTCTATT

>261

ATACTAGGTACTGTTCTAAGTGCTTTACAGCCATTAGCTTATTTAATCTCAACAACCCCT  
ATGAAGCAGGGTCTATTATTGTGTCCTTTTACCGATGAGGACACTTAAGCACAGAAAGG  
TTAAACAGTTTGTACAACCTC

>262

CTGTTCTAAGTGCTTTACAGCCATTAGCTTATTTAATCTCAACAACCCCTATGAAGCAGG  
GTCTATTATTGTGTCCTTTTACCGATGAGGACACTTAAGCACAGAAAGGTAAACAGTT  
TGTACAACCTCACTATCATT

>263

GTTCTAAGTGCTTTACAGCCATTAGCTTATTTAATCTCAACAACCCCTATGAAGCAGGGT  
CTATTATTGTGTCCTTTTACCGATGAGGACACTTAAGCACAGAAAGGTAAACAGTTTG  
TACAACCTCACTATCATTAGT

>264

TCAACAACCCCTATGAAGCAGGGTCTATTATTGTGTCCTTTTACCGATGAGGACACTTA  
AGCACAGAAAGGTAAACAGTTTGTACAACCTCACTATCATTAGTAGGTGTTAAAGAA  
CCTAGGTAGTCTAGCTCCAGAAT

>265

CCCTATGAAGCAGGGTCTATTATTGTGTCCTTTTACCGATGAGGACACTTAAGCACAGA  
AAGGTAAACAGTTTGTACAACCTCACTATCATTAGTAGGTGTTAAAGAACCTAGGTAG  
TCTAGCTCCAGAATCGGTGCTT

>266

GTGTCCTTTTACCGATGAGGACACTTAAGCACAGAAAGGTAAACAGTTTGTACAACC  
TCACTATCATTAGTAGGTGTTAAAGAACCTAGGTAGTCTAGCTCCAGAATCGGTGCTTG  
TAATCATACTCCCCTCCTGTATT

>267

CCTTTTACCGATGAGGACACTTAAGCACAGAAAGGTAAACAGTTTGTACAACCTCAC  
TATCATTAGTAGGTGTTAAAGAACCTAGGTAGTCTAGCTCCAGAATCGGTGCTTGTAAT  
CATACTCCCCTCCTGTATTGTCT

>268

AACTTAAGCACAGAAAGGTAAACAGTTTGTACAACCTCACTATCATTAGTAGGTGTT  
AAAGAACCTAGGTAGTCTAGCTCCAGAATCGGTGCTTGTAATCATACTCCCCTCCTGTA  
TTGTCTCTCATTGCTATTTCTT

>269

GTTTGTACAACCTCACTATCATTAGTAGGTGTTAAAGAACCTAGGTAGTCTAGCTCCAG  
AATCGGTGCTTGTAATCATACTCCCCTCCTGTATTGTCTCTCATTGCTATTTCTTCGTCTG  
TCAATTTTAGGCATTATCTG

>270

CATTAGTAGGTGTTAAAGAACCTAGGTAGTCTAGCTCCAGAATCGGTGCTTGTAATCAT  
ACTCCCCTCCTGTATTGTCTCTCATTGCTATTTCTTCGTCTGTCAATTTTAGGCATTATCT  
GTTAAGCTTTTAGTATGGGA

>271

GTAGGTGTTAAAGAACCTAGGTAGTCTAGCTCCAGAATCGGTGCTTGTAATCATACTCC  
CCTCCTGTATTGTCTCTCATTGCTATTTCTTCGTCTGTCAATTTTAGGCATTATCTGTAA

GCTTTTAGTATGGGATATGA

>272

TAGTCTAGCTCCAGAATCGGTGCTTGTAATCATACTCCCCCTCCTGTATTGTCTCTCATTG  
CTATTTCTTCGTCTGTCAATTTTAGGCATTATCTGTTAAGCTTTTAGTATGGGATATGAGC  
ATTAGTCTTCTTACACCA

>273

TGTAATCATACTCCCCCTCCTGTATTGTCTCTCATTGCTATTTCTTCGTCTGTCAATTTAG  
GCATTATCTGTTAAGCTTTTAGTATGGGATATGAGCATTAGTCTTCTTACACCATCACAT  
TGGCTTCCTTTCCCCTTT

>274

CCCCCTCCTGTATTGTCTCTCATTGCTATTTCTTCGTCTGTCAATTTTAGGCATTATCTGTT  
AAGCTTTTAGTATGGGATATGAGCATTAGTCTTCTTACACCATCACATTGGCTTCCTTT  
CCCCCTTCAGCTTCATAGT

>275

ATTGCTATTTCTTCGTCTGTCAATTTTAGGCATTATCTGTTAAGCTTTTAGTATGGGATAT  
GAGCATTAGTCTTCTTACACCATCACATTGGCTTCCTTTCCCCTTTCAGCTTCATAGTA  
ATTTAAAAATAAATCAGTA

>276

TAGTATGGGATATGAGCATTAGTCTTCTTACACCATCACATTGGCTTCCTTTCCCCTTTC  
AGCTTCATAGTAATTTAAAAATAAATCAGTATTCTGTGTTTACATTATTATAACTCTGAAA  
GATTCATTTACTATCAAG

>277

TTAGTCTTCTTACACCATCACATTGGCTTCCTTTCCCCTTTCAGCTTCATAGTAATTTAAA  
AATAAATCAGTATTCTGTGTTTACATTATTATAACTCTGAAAGATTCATTTACTATCAAGC  
CAAATAGTGTAGTGTGAT

>278

AAAAATAAATCAGTATTCTGTGTTTACATTATTATAACTCTGAAAGATTCATTTACTATCA  
AGCCAAATAGTGTAGTGTGATTAAATCTATTTTCTTCTAAAGCTTTTTGTTTTTCCTGGA  
GCTGACAATTGCATTATTT

>279

AAATAAATCAGTATTCTGTGTTTACATTATTATAACTCTGAAAGATTCATTTACTATCAAG  
CCAAATAGTGTAGTGTGATTAAATCTATTTTCTTCTAAAGCTTTTTGTTTTTCCTGGAGCT  
GACAATTGCATTATTTTT

>280

CTGAAAGATTCATTTACTATCAAGCCAAATAGTGTAGTGTGATTAAATCTATTTTCTTCTA  
AAGCTTTTTGTTTTTCCTGGAGCTGACAATTGCATTATTTTTTCATTGCTTAGTTTTCTG  
GTATTAATCACTAATTCT

>281

TAATCTATTTTCTTCTAAAGCTTTTTGTTTTTCCTGGAGCTGACAATTGCATTATTTTTTC  
ATTTGCTTAGTTTTCTGGTATTAATCACTAATTCTTTCCAAGCCTTTTGAGAACTGTAA  
AACCTACAATTCTTGCTT

>282

TTTCTTCTAAAGCTTTTTGTTTTTCCTGGAGCTGACAATTGCATTATTTTTTCATTGCTT  
AGTTTTCTGGTATTAATCACTAATTCTTTCCAAGCCTTTTGAGAACTGTAAAACCTAC



AATTCTTGCTTGAACCCGG

>283

TGCATTATTTTTTCATTTGCTTAGTTTTCTGGTATTAATCACTAATTCTTTCCAAGCCTTTT  
GAGAAACTGTAAAACCCTACAATTCTTGCTTGAACCCGGGAGGCGGAGGCTGCAGTG  
AGCCGAGATCGCACCATTGCA

>284

TCTTTCCAAGCCTTTTGAGAAACTGTAAAACCCTACAATTCTTGCTTGAACCCGGGAG  
GCGGAGGCTGCAGTGAGCCGAGATCGCACCATTGACCCCCAGCCTGGGCGACAGAGC  
AAGACCCCATCTCAAAAAACAAACA

>285

CATTGCACCCCAGCCTGGGCGACAGAGCAAGACCCCATCTCAAAAAACAAACAAACA  
AAAAACCCCTACAGTTCTGTTTTTTCACATGGTCAAATGTATCAGCTGCACTATTTTTTTT  
TTTTGAGACCTAAAACTAGGGAT

>286

CACCCCAGCCTGGGCGACAGAGCAAGACCCCATCTCAAAAAACAAACAAACAAAA  
ACCCCTACAGTTCTGTTTTTTCACATGGTCAAATGTATCAGCTGCACTATTTTTTTTTTTG  
AGACCTAAAACTAGGGATTGCCT

>287

GGCGACAGAGCAAGACCCCATCTCAAAAAACAAACAAACAAAAAACCCCTACAGTTC  
TGTTTTTTCACATGGTCAAATGTATCAGCTGCACTATTTTTTTTTTTTGAGACCTAAAACT  
AGGGATTGCCTAAGCCTTTCCTT

>288

TATCAGCTGCACTATTTTTTTTTTTTGAGACCTAAAACTAGGGATTGCCTAAGCCTTTC  
TTTTTAAAAAGTCAGGTTTATATAGGTATAACTTGCATACAGTAAAATTAACCTTTTTTA  
GGTGTAAGAGTTCTGAGAGG

>289

GCTGCACTATTTTTTTTTTTTGAGACCTAAAACTAGGGATTGCCTAAGCCTTTCCTTTTT  
AAAAAGTCAGGTTTATATAGGTATAACTTGCATACAGTAAAATTAACCTTTTTTAGGTGT  
AAGAGTTCTGAGAGGTTTGA

>290

CTAAAACTAGGGATTGCCTAAGCCTTTCCTTTTTTAAAAAGTCAGGTTTATATAGGTATAA  
CTTGCATACAGTAAAATTAACCTTTTTTAGGTGTAAGAGTTCTGAGAGGTTTGATAGAAT  
ATATCAAGGTATAGGGCCAG

>291

AGCCTTTCCTTTTTTAAAAAGTCAGGTTTATATAGGTATAACTTGCATACAGTAAAATTAA  
CCTTTTTTAGGTGTAAGAGTTCTGAGAGGTTTGATAGAATATATCAAGGTATAGGGCCA  
GCGCCGATGGCTCACACCTGT

>292

AGTCAGGTTTATATAGGTATAACTTGCATACAGTAAAATTAACCTTTTTTAGGTGTAAGA  
GTTCTGAGAGGTTTGATAGAATATATCAAGGTATAGGGCCAGCGCCGATGGCTCACACC  
TG TAGTCCCAACAATTTGGA

>293

AACTTGCATACAGTAAAATTAACCTTTTTTAGGTGTAAGAGTTCTGAGAGGTTTGATAG  
AATATATCAAGGTATAGGGCCAGCGCCGATGGCTCACACCTGTAGTCCCAACAATTTGG

GAGGCCAAGGCGGGAGGATCAC

>294

AGGTGTAAGAGTTCTGAGAGGTTTGATAGAATATATCAAGGTATAGGGCCAGCGCCGAT  
GGCTCACACCTGTAGTCCCAACAATTTGGGAGGCCAAGGCGGGAGGATCACTTAGGCC  
CAGGAGTTTGAGACCAGCTTGGG

>295

CGCCGATGGCTCACACCTGTAGTCCCAACAATTTGGGAGGCCAAGGCGGGAGGATCAC  
TTAGGCCCAGGAGTTTGAGACCAGCTTGGGCAACATAGTGAGACCCTGTCTCTACAAA  
AAAAAAAAAAAAAAAAAAGGTATCAAG

>296

CAACAATTTGGGAGGCCAAGGCGGGAGGATCACTTAGGCCCAGGAGTTTGAGACCAG  
CTTGGGCAACATAGTGAGACCCTGTCTCTACAAAAAAAAAAAAAAAAAAGGTATCAA  
GGTACAGGAAATTTCCACTACCCAAC

>297

GGAGGCCAAGGCGGGAGGATCACTTAGGCCCAGGAGTTTGAGACCAGCTTGGGCAAC  
ATAGTGAGACCCTGTCTCTACAAAAAAAAAAAAAAAAAAGGTATCAAGGTACAGGAA  
ATTTCCACTACCCAACAAAGGTCACT

>298

GCCCAGGAGTTTGAGACCAGCTTGGGCAACATAGTGAGACCCTGTCTCTACAAAAAA  
AAAAAAAAAAAAAAGGTATCAAGGTACAGGAAATTTCCACTACCCAACAAAGGTCACTC  
ACCCTTTTGTAGTTAATAACTTCTCT

>299

GTTTGAGACCAGCTTGGGCAACATAGTGAGACCCTGTCTCTACAAAAAAAAAAAAAAAA  
AAAAGGTATCAAGGTACAGGAAATTTCCACTACCCAACAAAGGTCACTCACCCTTTTG  
TAGTTAATAACTTCTCTGCAACCTA

>300

GACCCTGTCTCTACAAAAAAAAAAAAAAAAAAGGTATCAAGGTACAGGAAATTTCCA  
CTACCCAACAAAGGTCACTCACCCTTTTGTAGTTAATAACTTCTCTGCAACCTAGATCC  
AGCCAACCTACTGATAAGATGTCTG

>301

AAAAAAAAAAAAAAAAAAGGTATCAAGGTACAGGAAATTTCCACTACCCAACAAAGGT  
CACTCACCCTTTTGTAGTTAATAACTTCTCTGCAACCTAGATCCAGCCAACCTACTGATAA  
GATGTCTGTCCTTGTATTTCCA

>302

CAAAGGTCACTCACCCTTTTGTAGTTAATAACTTCTCTGCAACCTAGATCCAGCCAAC  
CTGATAAGATGTCTGTCCTTGTATTTCCAGAATGTACTTAAATGGAGTCATACAGTAA  
GTAGGCTTTTGTGTCTGGCTT

>303

GGTCACTCACCCTTTTGTAGTTAATAACTTCTCTGCAACCTAGATCCAGCCAACCTACTG  
ATAAGATGTCTGTCCTTGTATTTCCAGAATGTACTTAAATGGAGTCATACAGTAAGTAG  
GCTTTTGTGTCTGGCTTCAAG

>304

TTAATAACTTCTCTGCAACCTAGATCCAGCCAACCTACTGATAAGATGTCTGTCCTTGTAT  
TTTCCAGAATGTACTTAAATGGAGTCATACAGTAAGTAGGCTTTTGTGTCTGGCTTCAA

GCCTTTACTTTTTATAAAGAA

>305

CCAGCCAACTACTGATAAGATGTCTGTCCTTGTATTTTCCAGAATGTACTTAAATGGAGT  
CATACAGTAAGTAGGCTTTTGTGTCTGGCTTCAAGCCTTTACTTTTTATAAAGAATAACA  
ATGGTAATAATTATAGCTGA

>306

ACTGATAAGATGTCTGTCCTTGTATTTTCCAGAATGTACTTAAATGGAGTCATACAGTAA  
GTAGGCTTTTGTGTCTGGCTTCAAGCCTTTACTTTTTATAAAGAATAACAATGGTAATAA  
TTATAGCTGACATTTATTAA

>307

ATGGAGTCATACAGTAAGTAGGCTTTTGTGTCTGGCTTCAAGCCTTTACTTTTTATAAAG  
AATAACAATGGTAATAATTATAGCTGACATTTATTAAAGGCTGAGCGGATACTGTATACT  
GTGCTACAGGCTTTTCGTGG

>308

CTTTACTTTTTATAAAGAATAACAATGGTAATAATTATAGCTGACATTTATTAAAGGCTGA  
GCGGATACTGTATACTGTGCTACAGGCTTTTCGTGGGTATCTCATCACTGTTTCACATA  
TGTAGGTATACAGTTCTTT

>309

TTTTATAAAGAATAACAATGGTAATAATTATAGCTGACATTTATTAAAGGCTGAGCGGAT  
ACTGTATACTGTGCTACAGGCTTTTCGTGGGTATCTCATCACTGTTTCACATATGTAGG  
TATACAGTTCTTTCTTTAAA

>310

AATGGTAATAATTATAGCTGACATTTATTAAAGGCTGAGCGGATACTGTATACTGTGCTA  
CAGGCTTTTCGTGGGTATCTCATCACTGTTTCACATATGTAGGTATACAGTTCTTTCTTT  
AAAATATGTGACTGAAAAA

>311

GTAATAATTATAGCTGACATTTATTAAAGGCTGAGCGGATACTGTATACTGTGCTACAGG  
CTTTTCGTGGGTATCTCATCACTGTTTCACATATGTAGGTATACAGTTCTTTCTTTAAAA  
TATGTGACTGAAAAATATT

>312

TGACATTTATTAAAGGCTGAGCGGATACTGTATACTGTGCTACAGGCTTTTCGTGGGTTA  
TCTCATCACTGTTTCACATATGTAGGTATACAGTTCTTTCTTTAAAATATGTGACTGAAA  
AATATTATTGAACATTATGC

>313

AAAGGCTGAGCGGATACTGTATACTGTGCTACAGGCTTTTCGTGGGTATCTCATCACT  
GTTTCACATATGTAGGTATACAGTTCTTTCTTTAAAATATGTGACTGAAAAATATTATTGA  
ACATTATGCTAAAATTTGTT

>314

TATGTAGGTATACAGTTCTTTCTTTAAAATATGTGACTGAAAAATATTATTGAACATTATG  
CTAAAATTTGTTACACTGAGAAGACTTAAGAAAAACAGAGCTCATGTTTCTTTCAACT  
GATTCCTTTTACATTGTA

>315

CTGAAAAATATTATTGAACATTATGCTAAAATTTGTTACACTGAGAAGACTTAAGAAAA  
ACAGAGCTCATGTTTCTTTCAACTGATTCCTTTTACATTGTACTTGAGTACCTGGAA

GCTGCTTGCTTCTTTCCGCAG

>316

TTTGTTACACTGAGAAGACTTAAGAAAAACAGAGCTCATGTTTTCTTTCAACTGATTTC  
CTTTTTACATTGTAAGTACCTGGAAGCTGCTTGCTTCTTTCCGCAGCTTAGGATAC  
AAACTCCCTGACAGTTAAGTG

>317

TTTACATTGTAAGTACCTGGAAGCTGCTTGCTTCTTTCCGCAGCTTAGGATACAA  
ACTCCCTGACAGTTAAGTGCTTCTTTACTTCCCATCCAGTGCCTTGCACAGGGCTTGGT  
ACATGGTTTGGTCCAAAATATT

>318

ATTGTACTTGAGTACCTGGAAGCTGCTTGCTTCTTTCCGCAGCTTAGGATACAACTCC  
CTGACAGTTAAGTGCTTCTTTACTTCCCATCCAGTGCCTTGCACAGGGCTTGGTACATG  
GTTTGGTCCAAAATATTTGTTG

>319

CTGCTTGCTTCTTTCCGCAGCTTAGGATACAACTCCCTGACAGTTAAGTGCTTCTTTA  
CTTCCCATCCAGTGCCTTGCACAGGGCTTGGTACATGGTTTGGTCCAAAATATTTGTTG  
AATAAATTTGCAGATAGCCCAC

>320

GCTTAGGATACAACTCCCTGACAGTTAAGTGCTTCTTTACTTCCCATCCAGTGCCTTG  
CACAGGGCTTGGTACATGGTTTGGTCCAAAATATTTGTTGAATAAATTTGCAGATAGCC  
CACGTGTGTAGGAGAGGGAGAG

>321

TTAAGTGCTTCTTTACTTCCCATCCAGTGCCTTGCACAGGGCTTGGTACATGGTTTGGT  
CCAAAATATTTGTTGAATAAATTTGCAGATAGCCCACGTGTGTAGGAGAGGGAGAGAA  
GGTTCTTGAAAAATGGAGATTGG

>322

GTGCCTTGCACAGGGCTTGGTACATGGTTTGGTCCAAAATATTTGTTGAATAAATTTGC  
AGATAGCCCACGTGTGTAGGAGAGGGAGAGAAAGGTTCTTGAAAAATGGAGATTGGAG  
GAATCTAGGATGGGGAGGGAGATA

>323

GCCTTGCACAGGGCTTGGTACATGGTTTGGTCCAAAATATTTGTTGAATAAATTTGCAG  
ATAGCCCACGTGTGTAGGAGAGGGAGAGAAAGGTTCTTGAAAAATGGAGATTGGAGGA  
ATCTAGGATGGGGAGGGAGATATG

>324

GAAAAATGGAGATTGGAGGAATCTAGGATGGGGAGGGAGATATGGGAAGGGCCCAGA  
CAGAGGCAGGAGGGTTCCAACCTGTTCTCTTCCCTGCAGCCCAGTGTTTCCCGGGCT  
CTTTGAGTTCTGCTCGCGTTACACA

>325

GATTGGAGGAATCTAGGATGGGGAGGGAGATATGGGAAGGGCCCAGACAGAGGCAGG  
AGGGTTCCAACCTGTTCTCTTCCCTGCAGCCCAGTGTTTCCCGGGCTCTTTGAGTTCT  
GCTCGCGTTACACAGGCGCATCTC

>326

GGAGGGAGATATGGGAAGGGCCCAGACAGAGGCAGGAGGGTTCCAACCTGTTCTCTCT  
TCCCTGCAGCCCAGTGTTTCCCGGGCTCTTTGAGTTCTGCTCGCGTTACACAGGCGCAT

CTCTGCAAGGAGCAACCCAGCTGA

>327

CCCAGACAGAGGCAGGAGGGTTCCAAC TTGTTCTCTTCCCTGCAGCCCAGTGTTTCC  
CGGGCTCTTTGAGTTCTGCTCGCGTTACACAGGCGCATCTCTGCAAGGAGCAACCCAG  
CTGAACAACAAGGTGACATAGTCC

>328

GCAGGAGGGTTCCAAC TTGTTCTCTTCCCTGCAGCCCAGTGTTTCCCGGGCTCTTTG  
AGTTCTGCTCGCGTTACACAGGCGCATCTCTGCAAGGAGCAACCCAGCTGAACAACA  
AGGTGACATAGTCCCGAGTCCTGTT

>329

TTGAGTTCTGCTCGCGTTACACAGGCGCATCTCTGCAAGGAGCAACCCAGCTGAACAA  
CAAGGTGACATAGTCCCGAGTCCTGTTCTTCTTTCTCTGGATCCCTGGACTCGGGAT  
TTAACCTGATCCTGGGCTCCCA

>330

CTGCTCGCGTTACACAGGCGCATCTCTGCAAGGAGCAACCCAGCTGAACAACAAGGT  
GACATAGTCCCGAGTCCTGTTCTTCTTTCTCTGGATCCCTGGACTCGGGATTAAAC  
CTGATCCTGGGCTCCCAGCTTGAG

>331

CGCGTTACACAGGCGCATCTCTGCAAGGAGCAACCCAGCTGAACAACAAGGTGACAT  
AGTCCCGAGTCCTGTTCTTCTTTCTCTGGATCCCTGGACTCGGGATTAAACCCTGAT  
CCTGGGCTCCCAGCTTGAGGGGTG

>332

CCTGTTCTTCTTTCTCTGGATCCCTGGACTCGGGATTAAACCCTGATCCTGGGCTCCC  
AGCTTGAGGGGTGGGCAGGAAGGACTGTGACTTAGGTGTTTGTCTTTCAGATCTGTGA  
TATTGCCATTAACCTGGGCTGGT

>333

TCTGGATCCCTGGACTCGGGATTAAACCCTGATCCTGGGCTCCCAGCTTGAGGGGTGG  
GCAGGAAGGACTGTGACTTAGGTGTTTGTCTTTCAGATCTGTGATATTGCCATTAAC TG  
GGCTGGTGGTCTGCACCATGCCA

>334

CTGATCCTGGGCTCCCAGCTTGAGGGGTGGGCAGGAAGGACTGTGACTTAGGTGTTTG  
TCTTTCAGATCTGTGATATTGCCATTAAC TGGGCTGGTGGTCTGCACCATGCCAAGAAG  
TTTGAGGTGAGTGAGGAGGTGAT

>335

GGGTGGGCAGGAAGGACTGTGACTTAGGTGTTTGTCTTTCAGATCTGTGATATTGCCAT  
TAAC TGGGCTGGTGGTCTGCACCATGCCAAGAAGTTTGAGGTGAGTGAGGAGGTGAT  
GGGAAAGACAGTGGCCATCCTAGG

>336

TGGGCAGGAAGGACTGTGACTTAGGTGTTTGTCTTTCAGATCTGTGATATTGCCATTAA  
CTGGGCTGGTGGTCTGCACCATGCCAAGAAGTTTGAGGTGAGTGAGGAGGTGATGGG  
AAAGACAGTGGCCATCCTAGGGTA

>337

GTCTTTCAGATCTGTGATATTGCCATTAACTGGGCTGGTGGTCTGCACCATGCCAAGAA  
GTTTGAGGTGAGTGAGGAGGTGATGGGAAAGACAGTGGCCATCCTAGGGTAGGTGTTT

AGGATGATGGTGGGGGGCAGCTG

>338

GATCTGTGATATTGCCATTAAGTGGGCTGGTGGTCTGCACCATGCCAAGAAGTTTGAGG  
TGAGTGAGGAGGTGATGGGAAAGACAGTGGCCATCCTAGGGTAGGTGTTTAGGATGAT  
GGTGGGGGGCAGCTGGGAGGGGA

>339

CATTAAGTGGGCTGGTGGTCTGCACCATGCCAAGAAGTTTGAGGTGAGTGAGGAGGTG  
ATGGGAAAGACAGTGGCCATCCTAGGGTAGGTGTTTAGGATGATGGTGGGGGGCAGCT  
GGGAGGGGAATTGCTCTTCTCTTT

>340

GTGGTCTGCACCATGCCAAGAAGTTTGAGGTGAGTGAGGAGGTGATGGGAAAGACAG  
TGGCCATCCTAGGGTAGGTGTTTAGGATGATGGTGGGGGGCAGCTGGGAGGGGAATTG  
CTCTTCTCTTTATGAGACCACTGTC

>341

AGGGTAGGTGTTTAGGATGATGGTGGGGGGCAGCTGGGAGGGGAATTGCTCTTCTCTT  
TATGAGACCACTGTCTTGCCATAGGCCTCTGGCTTCTGCTATGTCAACGACATTGTGATT  
GGCATCCTGGAGCTGCTCAAGT

>342

CAGCTGGGAGGGGAATTGCTCTTCTCTTTATGAGACCACTGTCTTGCCATAGGCCTCTG  
GCTTCTGCTATGTCAACGACATTGTGATTGGCATCCTGGAGCTGCTCAAGTAAGTAGCC  
CAGGAGGAGATGGGGGCAGTTA

>343

GAATTGCTCTTCTCTTTATGAGACCACTGTCTTGCCATAGGCCTCTGGCTTCTGCTATGT  
CAACGACATTGTGATTGGCATCCTGGAGCTGCTCAAGTAAGTAGCCCAGGAGGAGATG  
GGGGCAGTTACGGGATTCTTGG

>344

CTGTCTTGCCATAGGCCTCTGGCTTCTGCTATGTCAACGACATTGTGATTGGCATCCTGG  
AGCTGCTCAAGTAAGTAGCCCAGGAGGAGATGGGGGCAGTTACGGGATTCTTGGCTGA  
GGAGGTCTCTCAGTCTCAACCC

>345

CTATGTCAACGACATTGTGATTGGCATCCTGGAGCTGCTCAAGTAAGTAGCCCAGGAG  
GAGATGGGGGCAGTTACGGGATTCTTGGCTGAGGAGGTCTCTCAGTCTCAACCCTGAC  
CTTGACCTCCCTCCTCCCTGATTA

>346

CATCCTGGAGCTGCTCAAGTAAGTAGCCCAGGAGGAGATGGGGGCAGTTACGGGATTCT  
TTGGCTGAGGAGGTCTCTCAGTCTCAACCCTGACCTTGACCTCCCTCCTCCCTGATTAG  
CTTCTCCCAAGTTCTTGATGCTT

>347

CTTGGCTGAGGAGGTCTCTCAGTCTCAACCCTGACCTTGACCTCCCTCCTCCCTGATTA  
GCTTCTCCCAAGTTCTTGATGCTTTATTCAGGCTGCCTCTTCCACTGCTGCAGATTCCCT  
ACTGCCTGCTCACATTTACAGC

>348

TGCCTCTTCCACTGCTGCAGATTCCCTACTGCCTGCTCACATTTACGCCTTCTCTGCATA  
TCCCTCTCCTGTCCCTGCCTCTAGCCTCTAGGCTGGAGCCCCCAGTTGCCTTTAGGGAA

CTGGTGACATTAAGTTTCAGG

>349

GCTCACATTTTCAGCCTTCTCTGCATATCCCTCTCCTGTCCCTGCCTCTAGCCTCTAGGCT  
GGAGCCCCCAGTTGCCTTTAGGGAACTGGTGACATTAAGTTTCAGGTGACCAGGGCAG  
AAGCAGACTCTTCACAATTCGA

>350

TCTGCATATCCCTCTCCTGTCCCTGCCTCTAGCCTCTAGGCTGGAGCCCCCAGTTGCCTT  
TAGGGAACTGGTGACATTAAGTTTCAGGTGACCAGGGCAGAAGCAGACTCTTCACAAT  
TCGAGACCCGGTGTTTGAGAGG

>351

CCTCTCCTGTCCCTGCCTCTAGCCTCTAGGCTGGAGCCCCCAGTTGCCTTTAGGGAACT  
GGTGACATTAAGTTTCAGGTGACCAGGGCAGAAGCAGACTCTTCACAATTCGAGACCC  
GGTGTTTGAGAGGAGTGGGTTGG

>352

TGTCCCTGCCTCTAGCCTCTAGGCTGGAGCCCCCAGTTGCCTTTAGGGAACTGGTGACA  
TTAAGTTTCAGGTGACCAGGGCAGAAGCAGACTCTTCACAATTCGAGACCCGGTGTTT  
GAGAGGAGTGGGTTGGGGGGTTC

>353

TTTAGGGAACTGGTGACATTAAGTTTCAGGTGACCAGGGCAGAAGCAGACTCTTCACA  
ATTCGAGACCCGGTGTTTGAGAGGAGTGGGTTGGGGGGTTCATTCTAGCTCAGACCC  
TGGCTTTGGCTTCCCTCTAGGTAC

>354

TAGGGAACTGGTGACATTAAGTTTCAGGTGACCAGGGCAGAAGCAGACTCTTCACAAT  
TCGAGACCCGGTGTTTGAGAGGAGTGGGTTGGGGGGTTCATTCTAGCTCAGACCCTG  
GCTTTGGCTTCCCTCTAGGTACCA

>355

TGACATTAAGTTTCAGGTGACCAGGGCAGAAGCAGACTCTTCACAATTCGAGACCCGG  
TGTTTGAGAGGAGTGGGTTGGGGGGTTCATTCTAGCTCAGACCCTGGCTTTGGCTTC  
CCTCTAGGTACCACCCTCGGGTGC

>356

TCAGGTGACCAGGGCAGAAGCAGACTCTTCACAATTCGAGACCCGGTGTTTGAGAGG  
AGTGGGTTGGGGGGTTCATTCTAGCTCAGACCCTGGCTTTGGCTTCCCTCTAGGTACC  
ACCCTCGGGTGCTCTACATTGACA

>357

CCCGGTGTTTGAGAGGAGTGGGTTGGGGGGTTCATTCTAGCTCAGACCCTGGCTTTG  
GCTTCCCTCTAGGTACCACCCTCGGGTGCTCTACATTGACATTGACATCCACCATGGTG  
ACGGGGTTCAAGAAGCTTTCTAC

>358

AGGAGTGGGTTGGGGGGTTCATTCTAGCTCAGACCCTGGCTTTGGCTTCCCTCTAGG  
TACCACCCTCGGGTGCTCTACATTGACATTGACATCCACCATGGTGACGGGGTTCAAGA  
AGCTTTCTACCTCACTGACCGGG

>359

AGACCCTGGCTTTGGCTTCCCTCTAGGTACCACCCTCGGGTGCTCTACATTGACATTGA  
CATCCACCATGGTGACGGGGTTCAAGAAGCTTTCTACCTCACTGACCGGGTCATGACG

GTGTCCTTCCACAAATACGGAAA

>360

GGTGTCTTACATTGACATTGACATCCACCATGGTGACGGGGTTCAAGAAGCTTTCTACC  
TCACTGACCGGGTTCATGACGGTGTCTTCCACAAATACGGAAATTACTTCTTCCCTGGC  
ACAGGTATGGGAATAGGGATTA

>361

CATTGACATTGACATCCACCATGGTGACGGGGTTCAAGAAGCTTTCTACCTCACTGACC  
GGGTTCATGACGGTGTCTTCCACAAATACGGAAATTACTTCTTCCCTGGCACAGGTATG  
GGAATAGGGATTACTTTCCCT

>362

CTTCTTCCCTGGCACAGGTATGGGAATAGGGATTACTTTCCCTTTGCACCCTTCAGCT  
CTTTACTATGAGTGCCTCCTTCTCAGCCTTCTAGTCTCATCTCAGGTGTCCCCTCCTCAG  
AGAAGCCTTTCCTTACCACTC

>363

GGAATAGGGATTACTTTCCCTTTGCACCCTTCAGCTCTTTACTATGAGTGCCTCCTTCT  
CAGCCTTCTAGTCTCATCTCAGGTGTCCCCTCCTCAGAGAAGCCTTTCCTTACCACTCC  
AGTTATCATAATCACCTCCTT

>364

GCCTCCTTCTCAGCCTTCTAGTCTCATCTCAGGTGTCCCCTCCTCAGAGAAGCCTTTC  
TTACCACTCCAGTTATCATAATCACCTCCTTCCCCATTCTCTGTTACATCAGCCTCATTG  
TTTCCCTCAGAACACTCACT

>365

GTGTCCCCTCCTCAGAGAAGCCTTTCCTTACCACTCCAGTTATCATAATCACCTCCTTCC  
CCATTCTCTGTTACATCAGCCTCATTGTTTCCCTCAGAACACTCACTGCTATTTGTGTT  
TATTGTGGTTTTTTGTTTTG

>366

AAGCCTTTCCTTACCACTCCAGTTATCATAATCACCTCCTTCCCCATTCTCTGTTACATC  
AGCCTCATTGTTTCCCTCAGAACACTCACTGCTATTTGTGTTTATTGTGGTTTTTTGTTT  
TGTTTTGTTTACTGCCTCC

>367

TAATCACCTCCTTCCCCATTCTCTGTTACATCAGCCTCATTGTTTCCCTCAGAACACTC  
ACTGCTATTTGTGTTTATTGTGGTTTTTTGTTTTGTTTTGTTTACTGCCTCCCTCCTCCTC  
ATGGCTATTCCCTAAGAAT

>368

TCCTCTGTTACATCAGCCTCATTGTTTCCCTCAGAACACTCACTGCTATTTGTGTTTATT  
GTGGTTTTTTGTTTTGTTTTGTTTACTGCCTCCCTCCTCCTCATGGCTATTCCCTAAGAAT  
ATAAGCGTGGTGGGATATC

>369

TGTTACATCAGCCTCATTGTTTCCCTCAGAACACTCACTGCTATTTGTGTTTATTGTGGT  
TTTTTGTTTTGTTTTGTTTACTGCCTCCCTCCTCCTCATGGCTATTCCCTAAGAATATAAG  
CGTGGTGGGATATCGTAAA

>370

CATCAGCCTCATTGTTTCCCTCAGAACACTCACTGCTATTTGTGTTTATTGTGGTTTTTT  
GTTTTGTTTTGTTTACTGCCTCCCTCCTCCTCATGGCTATTCCCTAAGAATATAAGCGTG



GTGGGATATCGTAAATTTCA

>371

GTGGTTTTTTGTTTTGTTTTGTTTACTGCCTCCCTCCTCATGGCTATTCCCTAAGAAT  
ATAAGCGTGGTGGGATATCGTAAATTTTCATTAGTTCCATTTCGTTGCTGCATCCCTACTGC  
CTAGTACACAGTTGGCTCA

>372

GTTTTGTTTTGTTTACTGCCTCCCTCCTCATGGCTATTCCCTAAGAATATAAGCGTG  
GTGGGATATCGTAAATTTTCATTAGTTCCATTTCGTTGCTGCATCCCTACTGCCTAGTACAC  
AGTTGGCTCAGAGTGGATCC

>373

TACTGCCTCCCTCCTCCTCATGGCTATTCCCTAAGAATATAAGCGTGGTGGGATATCGTA  
AATTTTCATTAGTTCCATTTCGTTGCTGCATCCCTACTGCCTAGTACACAGTTGGCTCAGAG  
TGGATCCCCCAAACTATTT

>374

TAAGAATATAAGCGTGGTGGGATATCGTAAATTTTCATTAGTTCCATTTCGTTGCTGCATCC  
CTACTGCCTAGTACACAGTTGGCTCAGAGTGGATCCCCCAAACTATTTGCCCAATGAA  
TGCAAGCTGCAAGAGATTTAG

>375

ATAAGCGTGGTGGGATATCGTAAATTTTCATTAGTTCCATTTCGTTGCTGCATCCCTACTGC  
CTAGTACACAGTTGGCTCAGAGTGGATCCCCCAAACTATTTGCCCAATGAATGCAAG  
CTGCAAGAGATTTAGTGGCTCT

>376

GGGATATCGTAAATTTTCATTAGTTCCATTTCGTTGCTGCATCCCTACTGCCTAGTACACAG  
TTGGCTCAGAGTGGATCCCCCAAACTATTTGCCCAATGAATGCAAGCTGCAAGAGAT  
TTAGTGGCTCTAGGGAGTTTAT

>377

AGTACACAGTTGGCTCAGAGTGGATCCCCCAAACTATTTGCCCAATGAATGCAAGCT  
GCAAGAGATTTAGTGGCTCTAGGGAGTTTATGGTGAAGCTACATAGATGGAATGAGAG  
GCTCCCAGAGTGCAGATTGGGGCT

>378

CTCAGAGTGGATCCCCCAAACTATTTGCCCAATGAATGCAAGCTGCAAGAGATTTAG  
TGGCTCTAGGGAGTTTATGGTGAAGCTACATAGATGGAATGAGAGGCTCCCAGAGTGC  
AGATTGGGGCTGAAACAGCTGGGT

>379

TGGATCCCCCAAACTATTTGCCCAATGAATGCAAGCTGCAAGAGATTTAGTGGCTCTA  
GGGAGTTTATGGTGAAGCTACATAGATGGAATGAGAGGCTCCCAGAGTGCAGATTGGG  
GCTGAAACAGCTGGGTTGTGGGT

>380

GCTGCAAGAGATTTAGTGGCTCTAGGGAGTTTATGGTGAAGCTACATAGATGGAATGAG  
AGGCTCCCAGAGTGCAGATTGGGGCTGAAACAGCTGGGTTGTGGGTGCTTCCCATGTG  
TGGCTACCACCACCCACTTCCCT

>381

GAGTTTATGGTGAAGCTACATAGATGGAATGAGAGGCTCCCAGAGTGCAGATTGGGGC  
TGAAACAGCTGGGTTGTGGGTGCTTCCCATGTGTGGCTACCACCACCCACTTCCCTAC

AGGTGACATGTATGAAGTCGGGGC

>382

TTTATGGTGAAGCTACATAGATGGAATGAGAGGCTCCCAGAGTGCAGATTGGGGCTGA  
AACAGCTGGGTTGTGGGTGCTTCCCATGTGTGGCTACCACCACCCACTTCCCTACAGG  
TGACATGTATGAAGTCGGGGCAGA

>383

AGATTGGGGCTGAAACAGCTGGGTTGTGGGTGCTTCCCATGTGTGGCTACCACCACCC  
ACTTCCCTACAGGTGACATGTATGAAGTCGGGGCAGAGAGTGGCCGCTACTACTGTCT  
GAACGTGCCCCCTGCGGGATGGCAT

>384

GGCTGAAACAGCTGGGTTGTGGGTGCTTCCCATGTGTGGCTACCACCACCCACTTCCC  
TACAGGTGACATGTATGAAGTCGGGGCAGAGAGTGGCCGCTACTACTGTCTGAACGTG  
CCCCTGCGGGATGGCATTGATGAC

>385

GGGTGCTTCCCATGTGTGGCTACCACCACCCACTTCCCTACAGGTGACATGTATGAAGT  
CGGGGCAGAGAGTGGCCGCTACTACTGTCTGAACGTGCCCCCTGCGGGATGGCATTGAT  
GACCAGAGTAAGTACCGAAGTCT

>386

CACCACCCACTTCCCTACAGGTGACATGTATGAAGTCGGGGCAGAGAGTGGCCGCTAC  
TACTGTCTGAACGTGCCCCCTGCGGGATGGCATTGATGACCAGAGTAAGTACCGAAGTC  
TCCCTCTGTTCCCTAGGCCCTT

>387

GAGAGTGGCCGCTACTACTGTCTGAACGTGCCCCCTGCGGGATGGCATTGATGACCAGA  
GTAAGTACCGAAGTCTTCCCTCTGTTCCCTAGGCCCTTCTTTTTCTCCTTGAAATAACC  
TCTTCTGCCTGGTATTGTCTGC

>388

TAAGTACCGAAGTCTTCCCTCTGTTCCCTAGGCCCTTCTTTTTCTCCTTGAAATAACCT  
CTTCTGCCTGGTATTGTCTGCTGTTGGGCCAGTTGTCCTTAAGGATGAATGGCCTTCAG  
AGGGACCATGAATCTCTGGAA

>389

ACCGAAGTCTTCCCTCTGTTCCCTAGGCCCTTCTTTTTCTCCTTGAAATAACCTCTTCT  
GCCTGGTATTGTCTGCTGTTGGGCCAGTTGTCCTTAAGGATGAATGGCCTTCAGAGGGA  
CCATGAATCTCTGGAAATTGT

>390

TGTTCCCTAGGCCCTTCTTTTTCTCCTTGAAATAACCTCTTCTGCCTGGTATTGTCTGC  
TGTTGGGCCAGTTGTCCTTAAGGATGAATGGCCTTCAGAGGGACCATGAATCTCTGGA  
AATTGTATGCAACATATCATGT

>391

TCCCTAGGCCCTTCTTTTTCTCCTTGAAATAACCTCTTCTGCCTGGTATTGTCTGCTGT  
TGGGCCAGTTGTCCTTAAGGATGAATGGCCTTCAGAGGGACCATGAATCTCTGGAAAT  
TGTATGCAACATATCATGTGTA

>392

CAGTTGTCCTTAAGGATGAATGGCCTTCAGAGGGACCATGAATCTCTGGAAATTGTATG  
CAACATATCATGTGTATGTGCATTTTTCTGGGAAAAGTCATTGGCTTTCATCAGTCACTC

ATAGCAGTCTGGGATCCCTTC

>393

GTTGTCTTAAGGATGAATGGCCTTCAGAGGGACCATGAATCTCTGGAAATTGTATGCA  
ACATATCATGTGTATGTGCATTTTTCTGGGAAAAGTCATTGGCTTTCATCAGTCACTCAT  
AGCAGTCTGGGATCCCTTCCA

>394

TTCAGAGGGACCATGAATCTCTGGAAATTGTATGCAACATATCATGTGTATGTGCATTTT  
TCTGGGAAAAGTCATTGGCTTTCATCAGTCACTCATAGCAGTCTGGGATCCCTTCCAGA  
AGTTTCAGACCAGTGATTGA

>395

TATGCAACATATCATGTGTATGTGCATTTTTCTGGGAAAAGTCATTGGCTTTCATCAGTC  
ACTCATAGCAGTCTGGGATCCCTTCCAGAAAGTTTCAGACCAGTGATTGATTCTTTTGG  
GTGGCCCCCTTCCTGGGCTAC

>396

TGTGCATTTTTCTGGGAAAAGTCATTGGCTTTCATCAGTCACTCATAGCAGTCTGGGAT  
CCCTTCCAGAAGTTTCAGACCAGTGATTGATTCTTTTGGGTGGCCCCCTTCCTGGGCT  
ACATGCTCGCTCAACCCCCCTT

>397

CCAGTGATTTGATTCTTTTGGGTGGCCCCCTTCCTGGGCTACATGCTCGCTCAACCCCC  
TTTTTCCTTTTGTTCCTGTCTCCCCATCCCCCTTGGGGTGCCAGGTGCCCATCTTTGGCC  
CTCTCCCAGGTTACAAGCACCT

>398

TTTGATTCTTTTGGGTGGCCCCCTTCCTGGGCTACATGCTCGCTCAACCCCCCTTTTTCCT  
TTTGTTCCTGTCTCCCCATCCCCCTTGGGGTGCCAGGTGCCCATCTTTGGCCCTCTCCC  
AGGTTACAAGCACCTTTTCCA

>399

CCCTTTCCTGGGCTACATGCTCGCTCAACCCCCCTTTTTCCTTTTGTTCCTGTCTCCCCA  
TCCCCTTGGGGTGCCAGGTGCCCATCTTTGGCCCTCTCCCAGGTTACAAGCACCTTTTC  
CAGCCGGTTATCAACCAGGTA

>400

CTGGGCTACATGCTCGCTCAACCCCCCTTTTTCCTTTTGTTCCTGTCTCCCCATCCCCCT  
GGGGTGCCAGGTGCCCATCTTTGGCCCTCTCCCAGGTTACAAGCACCTTTTCCAGCCG  
GTTATCAACCAGGTAGTGGACT

>401

CTTTTTCCTTTTGTTCCTGTCTCCCCATCCCCCTTGGGGTGCCAGGTGCCCATCTTTGGC  
CCTCTCCCAGGTTACAAGCACCTTTTCCAGCCGGTTATCAACCAGGTAGTGGACTTCTA  
CCAACCCACGTGCATTGTGCT

>402

CCCCATCCCCCTTGGGGTGCCAGGTGCCCATCTTTGGCCCTCTCCCAGGTTACAAGCACCT  
TTTTCCAGCCGGTTATCAACCAGGTAGTGGACTTCTACCAACCCACGTGCATTGTGCTC  
CAGGTAATACTGTCAGTTCCTC

>403

GGGGTGCCAGGTGCCCATCTTTGGCCCTCTCCCAGGTTACAAGCACCTTTTCCAGCCG  
GTTATCAACCAGGTAGTGGACTTCTACCAACCCACGTGCATTGTGCTCCAGGTAATACT

GTCAGTTCCTCCTCAGGAGTGTT

>404

GCCCTCTCCCAGGTTACAAGCACCTTTTCCAGCCGGTTATCAACCAGGTAGTGGACTTC  
TACCAACCCACGTGCATTGTGCTCCAGGTAATACTGTCAGTTCCTCCTCAGGAGTGTTT  
TGCCTGGGCTTGGGGAAAGAGA

>405

TTTTCCAGCCGGTTATCAACCAGGTAGTGGACTTCTACCAACCCACGTGCATTGTGCTC  
CAGGTAATACTGTCAGTTCCTCCTCAGGAGTGTTCTGCCTGGGCTTGGGGAAAGAGAG  
CAAGGGAAGAGGAGGTTCTTTAG

>406

CCAGCCGGTTATCAACCAGGTAGTGGACTTCTACCAACCCACGTGCATTGTGCTCCAG  
GTAATACTGTCAGTTCCTCCTCAGGAGTGTTCTGCCTGGGCTTGGGGAAAGAGAGCAA  
GGGAAGAGGAGGTTCTTTAGGTTG

>407

ACCAGGTAGTGGACTTCTACCAACCCACGTGCATTGTGCTCCAGGTAATACTGTCAGTT  
CCTCCTCAGGAGTGTTCTGCCTGGGCTTGGGGAAAGAGAGCAAGGGAAGAGGAGGTT  
CTTTAGGTTGGTGGTGGGAAGGGGT

>408

GGTAATACTGTCAGTTCCTCCTCAGGAGTGTTCTGCCTGGGCTTGGGGAAAGAGAGCA  
AGGGAAGAGGAGGTTCTTTAGGTTGGTGGTGGGAAGGGGTATCTGTGATGTTCTGATCA  
GTTCTGATCACTGCACTTTCCTGG

>409

GTCAGTTCCTCCTCAGGAGTGTTCTGCCTGGGCTTGGGGAAAGAGAGCAAGGGAAGA  
GGAGGTTCTTTAGGTTGGTGGTGGGAAGGGGTATCTGTGATGTTCTGATCAGTTCTGATC  
ACTGCACTTTCCTGGGGTTTTGCT

>410

GAGTGTTCTGCCTGGGCTTGGGGAAAGAGAGCAAGGGAAGAGGAGGTTCTTTAGGTT  
GGTGGTGGGAAGGGGTATCTGTGATGTTCTGATCAGTTCTGATCACTGCACTTTCCTGGG  
GTTTTGCTTTTTGCAGTGTGGAGC

>411

TTCTTTAGGTTGGTGGTGGGAAGGGGTATCTGTGATGTTCTGATCAGTTCTGATCACTGC  
ACTTTCCTGGGGTTTTGCTTTTTGCAGTGTGGAGCTGACTCTCTGGGCTGTGATCGATT  
GGGCTGCTTTAACCTCAGCATC

>412

GTGGAAGGGGTATCTGTGATGTTCTGATCAGTTCTGATCACTGCACTTTCCTGGGGTTT  
TGCTTTTTGCAGTGTGGAGCTGACTCTCTGGGCTGTGATCGATTGGGCTGCTTTAACCT  
CAGCATCCGAGGGCATGGGTGA

>413

CTGATCAGTTCTGATCACTGCACTTTCCTGGGGTTTTGCTTTTTGCAGTGTGGAGCTGA  
CTCTCTGGGCTGTGATCGATTGGGCTGCTTTAACCTCAGCATCCGAGGGCATGGGTGAG  
ACTTGCTCTCCTTCTTCTCCCC

>414

TGCAGTGTGGAGCTGACTCTCTGGGCTGTGATCGATTGGGCTGCTTTAACCTCAGCATC  
CGAGGGCATGGGTGAGACTTGCTCTCCTTCTTCTCCCCAAGGTTTTTAAGTGGCCTTG

ACTTCAGTACGTGGGTGGGGGT

>415

ATCGATTGGGCTGCTTTAACCTCAGCATCCGAGGGCATGGGTGAGACTTGCTCTCCTTC  
TTCTCCCCAAGGTTTTTAAGTGGCCTTGGACTTCAGTACGTGGGTGGGGGTAGTTGGG  
GAATGGGCCTCACCTCTTCTTGG

>416

GGCTGCTTTAACCTCAGCATCCGAGGGCATGGGTGAGACTTGCTCTCCTTCTTCTCCCC  
AAGGTTTTTAAGTGGCCTTGGACTTCAGTACGTGGGTGGGGGTAGTTGGGGAATGGGC  
CTCACCTCTTCTTGGAAATCAAA

>417

GCATCCGAGGGCATGGGTGAGACTTGCTCTCCTTCTTCTCCCCAAGGTTTTTAAGTGGC  
CTTGGACTTCAGTACGTGGGTGGGGGTAGTTGGGGAATGGGCCTCACCTCTTCTTGGAA  
AATCAAAAATAGCTACAAATTGT

>418

CAGTACGTGGGTGGGGGTAGTTGGGGAATGGGCCTCACCTCTTCTTGGAAATCAAAA  
TAGCTACAAATTGTACTTGAAC TAGAAATGTCATCTTGAACAGGGTTCCTAGATGGTC  
ATTCATTACGATATATTTTTAT

>419

TAGTTGGGGAATGGGCCTCACCTCTTCTTGGAAATCAAAAATAGCTACAAATTGTACTT  
GAACTAGAAATGTCATCTTGAACAGGGTTCCTAGATGGTCATTCATTACGATATATTT  
TTATTAAGCACCTGTTATGTT

>420

CCTCACCTCTTCTTGGAAATCAAAAATAGCTACAAATTGTACTTGAAC TAGAAATGTCA  
TCTTGAACAGGGTTCCTAGATGGTCATTCATTACGATATATTTTTATTAAGCACCTGTT  
ATGTTCCAGGCATCATACCA

>421

TTGGAATCAAAAATAGCTACAAATTGTACTTGAAC TAGAAATGTCATCTTGAACAGGG  
TTCCTAGATGGTCATTCATTACGATATATTTTTATTAAGCACCTGTTATGTTCCAGGCA  
TCATACCACATCATGGGGAT

>422

CTAGAAATGTCATCTTGAACAGGGTTCCTAGATGGTCATTCATTACGATATATTTTTAT  
TAAGCACCTGTTATGTTCCAGGCATCATACCACATCATGGGGATGGAATAAGGAGTCTC  
CCATGGAGTTTACAGTTTAG

>423

AATGTCATCTTGAACAGGGTTCCTAGATGGTCATTCATTACGATATATTTTTATTAAGC  
ACCTGTTATGTTCCAGGCATCATACCACATCATGGGGATGGAATAAGGAGTCTCCCATG  
GAGTTTACAGTTTAGGAAAC

>424

CACGATATATTTTTATTAAGCACCTGTTATGTTCCAGGCATCATACCACATCATGGGGATG  
GAATAAGGAGTCTCCCATGGAGTTTACAGTTTAGGAAACAGACAAAAAATAAATAATC  
AAATGAAATAAATAGATTCTT

>425

GCACCTGTTATGTTCCAGGCATCATACCACATCATGGGGATGGAATAAGGAGTCTCCCA  
TGGAGTTTACAGTTTAGGAAACAGACAAAAAATAAATAATCAAATGAAATAAATAGATT



ATCACTTGAGCCTAGGAGTTTGAGG

>437

AACATAGTGAGAGCCATCTCTACAGAAAATAAAAAACAAAATCAGCTGGGCATGATGG  
TGCATGCCTATAGTCCTAGCTACTCAGGAAGCTGAGGCAGGAGGATCACTTGAGCCTA  
GGAGTTTGAGGTTACAGTGAACATA

>438

GCATGATGGTGCATGCCTATAGTCCTAGCTACTCAGGAAGCTGAGGCAGGAGGATCAC  
TTGAGCCTAGGAGTTTGAGGTTACAGTGAACATGATTGTGCCACTGGACTTCAGTCTG  
TTGAGGTGAGGTCCGAGAAGCTG

>439

GGTGCATGCCTATAGTCCTAGCTACTCAGGAAGCTGAGGCAGGAGGATCACTTGAGCC  
TAGGAGTTTGAGGTTACAGTGAACATGATTGTGCCACTGGACTTCAGTCTGTTGAGGT  
GAGGTCCGAGAAGCTGGCCATGG

>440

TGCCTATAGTCCTAGCTACTCAGGAAGCTGAGGCAGGAGGATCACTTGAGCCTAGGAG  
TTTGAGGTTACAGTGAACATGATTGTGCCACTGGACTTCAGTCTGTTGAGGTGAGGTC  
CGAGAAGCTGGCCATGGTGAAGA

>441

AGCTACTCAGGAAGCTGAGGCAGGAGGATCACTTGAGCCTAGGAGTTTGAGGTTACA  
GTGAACATGATTGTGCCACTGGACTTCAGTCTGTTGAGGTGAGGTCCGAGAAGCTGG  
CCATGGTGAAGATTGTGCATGAGCC

>442

GAGGCAGGAGGATCACTTGAGCCTAGGAGTTTGAGGTTACAGTGAACATGATTGTGC  
CACTGGACTTCAGTCTGTTGAGGTGAGGTCCGAGAAGCTGGCCATGGTGAAGATTGTG  
CATGAGCCTTTAAACCCTGGTAAG

>443

GGTTACAGTGAACATGATTGTGCCACTGGACTTCAGTCTGTTGAGGTGAGGTCCGAG  
AAGCTGGCCATGGTGAAGATTGTGCATGAGCCTTTAAACCCTGGTAAGGAGTTTGAATT  
ATATTCCAAAGATGATGGGAAAC

>444

GAACATGATTGTGCCACTGGACTTCAGTCTGTTGAGGTGAGGTCCGAGAAGCTGGCC  
ATGGTGAAGATTGTGCATGAGCCTTTAAACCCTGGTAAGGAGTTTGAATTATATTCCAA  
AGATGATGGGAAACCATTTGAAGG

>445

CTTCAGTCTGTTGAGGTGAGGTCCGAGAAGCTGGCCATGGTGAAGATTGTGCATGAGC  
CTTTAAACCCTGGTAAGGAGTTTGAATTATATTCCAAAGATGATGGGAAACCATTTGAAG  
GATTTTAAGCAGGAAAGTGACAT

>446

AACCCTGGTAAGGAGTTTGAATTATATTCCAAAGATGATGGGAAACCATTTGAAGGATTT  
TAAGCAGGAAAGTGACATGATCCAATTTGTGTTTGAAAGTGACAATTCTGACTGCTGA  
ATAGAGAAAGGTTTGGGTAGGGG

>447

TGAATTATATTCCAAAGATGATGGGAAACCATTTGAAGGATTTTAAGCAGGAAAGTGACA  
TGATCCAATTTGTGTTTGAAAGTGACAATTCTGACTGCTGAATAGAGAAAGGTTTGGGT

AGGGGGGATGGAGATGGAAGTA

>448

TCCAAAGATGATGGGAAACCAATTGAAGGATTTTAAGCAGGAAAGTGACATGATCCAAT  
TTGTGTTTGAAGTGACAATTCTGACTGCTGAATAGAGAAAGGTTTGGGTAGGGGGGA  
TGGAGATGGAAGTAGAAGAGACCT

>449

TTTAAGCAGGAAAGTGACATGATCCAATTTGTGTTTGAAGTGACAATTCTGACTGCTG  
AATAGAGAAAGGTTTGGGTAGGGGGGATGGAGATGGAAGTAGAAGAGACCTAGTTAG  
GAAGCCATGGTGTGGTTAGGTGC

>450

TTTGTGTTTGAAGTGACAATTCTGACTGCTGAATAGAGAAAGGTTTGGGTAGGGGGG  
ATGGAGATGGAAGTAGAAGAGACCTAGTTAGGAAGCCATGGTGTGGTTAGGTGCCCA  
GACTAAGGTGGAGGGGGTGGCAAT

>451

TGACAATTCTGACTGCTGAATAGAGAAAGGTTTGGGTAGGGGGGATGGAGATGGAAGT  
AGAAGAGACCTAGTTAGGAAGCCATGGTGTGGTTAGGTGCCCAGACTAAGGTGGAG  
GGGGTGGCAATGGAGAGAAGTAGAT

>452

GCTGAATAGAGAAAGGTTTGGGTAGGGGGGATGGAGATGGAAGTAGAAGAGACCTAG  
TTAGGAAGCCATGGTGTGGTTAGGTGCCCAGACTAAGGTGGAGGGGGGTGGCAATGG  
AGAGAAGTAGATGATCTGAGAGGTGT

>453

GGGGGATGGAGATGGAAGTAGAAGAGACCTAGTTAGGAAGCCATGGTGTGGTTAGG  
TGCCCAGACTAAGGTGGAGGGGGTGGCAATGGAGAGAAGTAGATGATCTGAGAGGTG  
TGTGTGTGTGTGTGTGTATATATATA

>454

AGATGGAAGTAGAAGAGACCTAGTTAGGAAGCCATGGTGTGGTTAGGTGCCCAGACT  
AAGGTGGAGGGGGTGGCAATGGAGAGAAGTAGATGATCTGAGAGGTGTGTGTGTGTG  
TGTGTGTATATATATATATATACAC

>455

GACCTAGTTAGGAAGCCATGGTGTGGTTAGGTGCCCAGACTAAGGTGGAGGGGGTG  
GCAATGGAGAGAAGTAGATGATCTGAGAGGTGTGTGTGTGTGTGTGTGTATATATATA  
TATACACACACACACACATAT

>456

CATGGTGTGGTTAGGTGCCCAGACTAAGGTGGAGGGGGTGGCAATGGAGAGAAGTA  
GATGATCTGAGAGGTGTGTGTGTGTGTGTGTGTATATATATATATACACACACACA  
CACATATATATGTTTTTTTTTTT

>457

ATGATCTGAGAGGTGTGTGTGTGTGTGTGTGTGTATATATATATATACACACACACAC  
ACATATATATGTTTTTTTTTTTCTTTTTTGAGATGGAGTCTTGCTCTGTCACCCAGGCTGG  
AGTGCAGTGGCACGATCTT

>458

TGTGTATATATATATATATACACACACACACACATATATATGTTTTTTTTTTTCTTTTTTG  
AGATGGAGTCTTGCTCTGTCACCCAGGCTGGAGTGCAGTGGCACGATCTTGGCTCAGT



GCAAGCTCTGCCTCCTGGG

>459

TATATATATACACACACACACACATATATATGTTTTTTTTTTCTTTTTTGAGATGGAGT  
CTTGCTCTGTCACCCAGGCTGGAGTGCAGTGGCACGATCTTGGCTCAGTGCAAGCTCT  
GCCTCCTGGGTTCAAGCATT

>460

ACACACACACATATATATGTTTTTTTTTTCTTTTTTGAGATGGAGTCTTGCTCTGTCACC  
CAGGCTGGAGTGCAGTGGCACGATCTTGGCTCAGTGCAAGCTCTGCCTCCTGGGTTCA  
AGCATTTCTCCTGCCTCAGCC

>461

TTTTTTCTTTTTTGAGATGGAGTCTTGCTCTGTCACCCAGGCTGGAGTGCAGTGGCACG  
ATCTTGGCTCAGTGCAAGCTCTGCCTCCTGGGTTCAAGCATTTCTCCTGCCTCAGCCTC  
CTGAGTAGCTGGGACTACTACA

>462

AGTCTTGCTCTGTCACCCAGGCTGGAGTGCAGTGGCACGATCTTGGCTCAGTGCAAGC  
TCTGCCTCCTGGGTTCAAGCATTTCTCCTGCCTCAGCCTCCTGAGTAGCTGGGACTACT  
ACAAAGGCGTGAGCACCGCGCCG

>463

TGGCACGATCTTGGCTCAGTGCAAGCTCTGCCTCCTGGGTTCAAGCATTTCTCCTGCCT  
CAGCCTCCTGAGTAGCTGGGACTACTACAAAGGCGTGAGCACCGCGCCGGGCGTGAG  
TTATATTTTCAAGGCTAGAATTGA

>464

AGCTCTGCCTCCTGGGTTCAAGCATTTCTCCTGCCTCAGCCTCCTGAGTAGCTGGGACT  
ACTACAAAGGCGTGAGCACCGCGCCGGGCGTGAGTTATATTTTCAAGGCTAGAATTGA  
CAGAACTTGGGTTGATGAGAATA

>465

CAAGCATTTCTCCTGCCTCAGCCTCCTGAGTAGCTGGGACTACTACAAAGGCGTGAGC  
ACCGCGCCGGGCGTGAGTTATATTTTCAAGGCTAGAATTGACAGAACTTGGGTTGATG  
AGAATAGTTGATTAGCAGGCAGGG

>466

CTACTACAAAGGCGTGAGCACCGCGCCGGGCGTGAGTTATATTTTCAAGGCTAGAATT  
GACAGAACTTGGGTTGATGAGAATAGTTGATTAGCAGGCAGGGTGCCAGGGAGGGTG  
TTGAGCAGAACAGAGGGGGGACTGT

>467

GTGAGCACCGCGCCGGGCGTGAGTTATATTTTCAAGGCTAGAATTGACAGAACTTGGG  
TTGATGAGAATAGTTGATTAGCAGGCAGGGTGCCAGGGAGGGTGTTGAGCAGAACAG  
AGGGGGGACTGTGCTTTATTTTAAA

>468

CGTGAGTTATATTTTCAAGGCTAGAATTGACAGAACTTGGGTTGATGAGAATAGTTGAT  
TAGCAGGCAGGGTGCCAGGGAGGGTGTTGAGCAGAACAGAGGGGGGACTGTGCTTTA  
TTTTAAAATTTTATTGAGACACA

>469

GGGTTGATGAGAATAGTTGATTAGCAGGCAGGGTGCCAGGGAGGGTGTTGAGCAGAA  
CAGAGGGGGGACTGTGCTTTATTTTAAAATTTTATTGAGACACAGCATATAAAGTATAC

CCAAATCTTAAGGGTATAACATA

>470

AGGGTGTTGAGCAGAACAGAGGGGGGACTGTGCTTTATTTTAAAATTTTATTGAGAC  
ACAGCATATAAAGTATACCCAAATCTTAAGGGTATAACATAATGAATTTCACTATCAAGA  
TAAAGATTTAGAACATTTATAG

>471

AGGGGGGACTGTGCTTTATTTTAAAATTTTATTGAGACACAGCATATAAAGTATACCCA  
AATCTTAAGGGTATAACATAATGAATTTCACTATCAAGATAAAGATTTAGAACATTTATA  
GTTTTCTTGCTCCTTTCA

>472

AGTATACCCAAATCTTAAGGGTATAACATAATGAATTTCACTATCAAGATAAAGATTTAG  
AACATTTATAGTTTTCTTGCTCCTTTCAGGCAATACCTAAAGGTATTTACCTTGCTTT  
TGATAACCTCCTCCACATC

>473

CAAATCTTAAGGGTATAACATAATGAATTTCACTATCAAGATAAAGATTTAGAACATTTA  
TAGTTTTCTTGCTCCTTTCAGGCAATACCTAAAGGTATTTACCTTGCTTTTGATAAC  
CTCCTCCACATCTTCCTCTG

>474

ATTTCACTATCAAGATAAAGATTTAGAACATTTATAGTTTTCTTGCTCCTTTCAGGCA  
ATACCTAAAGGTATTTACCTTGCTTTTGATAACCTCCTCCACATCTTCCTCTGGTTCCT  
TTAACAGGGAATGCGTTGA

>475

GTGCTCCTTTCAGGCAATACCTAAAGGTATTTACCTTGCTTTTGATAACCTCCTCCACA  
TCTTCCTCTGGTTCCTTTTAACAGGGAATGCGTTGAATATGTCAAGAGCTTCAATATCCC  
TCTACTCGTGCTGGGTGGTG

>476

TAAAGGTATTTACCTTGCTTTTGATAACCTCCTCCACATCTTCCTCTGGTTCCTTTAAC  
AGGGAATGCGTTGAATATGTCAAGAGCTTCAATATCCCTCTACTCGTGCTGGGTGGTGG  
TGGTTATACTGTCCGAAATG

>477

ACATCTTCCTCTGGTTCCTTTTAACAGGGAATGCGTTGAATATGTCAAGAGCTTCAATAT  
CCCTCTACTCGTGCTGGGTGGTGGTGGTTATACTGTCCGAAATGTTGCCCGCTGCTGGT  
GAGCACTCTCCTGATTTCTC

>478

CCTCTGGTTCCTTTTAACAGGGAATGCGTTGAATATGTCAAGAGCTTCAATATCCCTCTA  
CTCGTGCTGGGTGGTGGTGGTTATACTGTCCGAAATGTTGCCCGCTGCTGGTGAGCACT  
CTCCTGATTTCTCCCTGTT

>479

CGTTGAATATGTCAAGAGCTTCAATATCCCTCTACTCGTGCTGGGTGGTGGTGGTTATAC  
TGTCGAAATGTTGCCCGCTGCTGGTGAGCACTCTCCTGATTTCTCCCTGTTGTCCA  
GTGTGAGCTAGGGTGTCCCTC

>480

TGGGTGGTGGTGGTTATACTGTCCGAAATGTTGCCCGCTGCTGGTGAGCACTCTCCTGA  
TTTCCTCCCTGTTGTCCAGTGTGAGCTAGGGTGTCCCTCAGATATGGCCACATGGGCC

CTTCAGCCCACTTGGTCAGCCT

>481

GGTGGTTATACTGTCCGAAATGTTGCCCGCTGCTGGTGAGCACTCTCCTGATTTCTCC  
CCTGTTGTCCAGTGTGAGCTAGGGTGTCCCTCAGATATGGCCACATGGGCCCTTCAGCC  
CACTTGGTCAGCCTGCTCCCCCT

>482

CCTCCCCTGTTGTCCAGTGTGAGCTAGGGTGTCCCTCAGATATGGCCACATGGGCCCTT  
CAGCCCACTTGGTCAGCCTGCTCCCCCTCTGCTGGTTGGTTTCAGGACATATGAGACATC  
GCTGCTGGTAGAAGAGGCCATT

>483

GCTAGGGTGTCCCTCAGATATGGCCACATGGGCCCTTCAGCCCACTTGGTCAGCCTGCT  
CCCCCTCTGCTGGTTGGTTTCAGGACATATGAGACATCGCTGCTGGTAGAAGAGGCCATT  
AGTGAGGAGCTTCCCTATAGTG

>484

CCTTCAGCCCACTTGGTCAGCCTGCTCCCCCTCTGCTGGTTGGTTTCAGGACATATGAGA  
CATCGCTGCTGGTAGAAGAGGCCATTAGTGAGGAGCTTCCCTATAGTGAGTAAGGACAC  
CCACAACACCCCATACAGGAAG

>485

TCAGCCTGCTCCCCCTCTGCTGGTTGGTTTCAGGACATATGAGACATCGCTGCTGGTAGA  
AGAGGCCATTAGTGAGGAGCTTCCCTATAGTGAGTAAGGACACCCACAACACCCCATAA  
CAGGAAGGCCATTCTCACCAGAT

>486

CTGGTTGGTTTCAGGACATATGAGACATCGCTGCTGGTAGAAGAGGCCATTAGTGAGG  
AGCTTCCCTATAGTGAGTAAGGACACCCACAACACCCCATACAGGAAGGCCATTCTCA  
CCAGATTCCAGAATGACCTGGTTT

>487

GTTGGTTTCAGGACATATGAGACATCGCTGCTGGTAGAAGAGGCCATTAGTGAGGAGC  
TTCCTATAGTGAGTAAGGACACCCACAACACCCCATACAGGAAGGCCATTCTCACCA  
GATTCCAGAATGACCTGGTTTGAA

>488

TATAGTGGTAAGGACACCCACAACACCCCATACAGGAAGGCCATTCTCACCAGATTCT  
CAGAATGACCTGGTTTGAAGGCACATGGGAAATTTTACACTCTCAGAGCTCTGCAGAC  
TAAACCCCTGGGCTCAGAGCAGGG

>489

TTTACACTCTCAGAGCTCTGCAGACTAAACCCCTGGGCTCAGAGCAGGGAAGAGATTG  
GGCAGCTATTATGTAGGTGCTCTGGATGGGAAGGAAAAAGATTGGGAAGTCTTGTTAG  
CTGCCTTTCTCAGTCTGAGCCATA

>490

CACTCTCAGAGCTCTGCAGACTAAACCCCTGGGCTCAGAGCAGGGAAGAGATTGGGC  
AGCTATTATGTAGGTGCTCTGGATGGGAAGGAAAAAGATTGGGAAGTCTTGTTAGCTG  
CCTTTCTCAGTCTGAGCCATACTTT

>491

GCTCAGAGCAGGGAAGAGATTGGGCAGCTATTATGTAGGTGCTCTGGATGGGAAGGAA  
AAAGATTGGGAAGTCTTGTTAGCTGCCTTTCTCAGTCTGAGCCATACTTTCTCCTCTCC

TCCCCAAGAATACTTCGAGTACT

>492

GAGCAGGGAAGAGATTGGGCAGCTATTATGTAGGTGCTCTGGATGGGAAGGAAAAAG  
ATTGGGAAGTCTTGTTAGCTGCCTTTCTCAGTCTGAGCCATACTTTCTCCTCTCCTCCCC  
AAGAATACTTCGAGTACTTTGCC

>493

GGCAGCTATTATGTAGGTGCTCTGGATGGGAAGGAAAAAGATTGGGAAGTCTTGTTAG  
CTGCCTTTCTCAGTCTGAGCCATACTTTCTCCTCTCCTCCCCAAGAATACTTCGAGTACT  
TTGCCCCAGACTTCACACTTCA

>494

GGGAAGTCTTGTTAGCTGCCTTTCTCAGTCTGAGCCATACTTTCTCCTCTCCTCCCCAA  
GAATACTTCGAGTACTTTGCCCCAGACTTCACACTTCATCCAGATGTCAGCACCCGCAT  
CGAGAATCAGAACTCACGCCAG

>495

CCATACTTTCTCCTCTCCTCCCCAAGAATACTTCGAGTACTTTGCCCCAGACTTCACACT  
TCATCCAGATGTCAGCACCCGCATCGAGAATCAGAACTCACGCCAGGTCAGCAGCTCA  
GAAAAGCTGAGCACAACTTCT

>496

CCGCATCGAGAATCAGAACTCACGCCAGGTCAGCAGCTCAGAAAAGCTGAGCACAAA  
CTTCTCCTGAAAGGTGGAGCCCAGGAGAGGTCAAAGATGTGGGAAGTAGGAAAAACC  
AAAGAGAAGGAAGTTCTAAGCCATCA

>497

AACTCACGCCAGGTCAGCAGCTCAGAAAAGCTGAGCACAACTTCTCCTGAAAGGTG  
GAGCCCAGGAGAGGTCAAAGATGTGGGAAGTAGGAAAAACCAAAGAGAAGGAAGTT  
CTAAGCCATCACAGTCACTGTTATTGA

>498

GCAGCTCAGAAAAGCTGAGCACAACTTCTCCTGAAAGGTGGAGCCCAGGAGAGGTC  
AAAGATGTGGGAAGTAGGAAAAACCAAAGAGAAGGAAGTTCTAAGCCATCACAGTCA  
CTGTTATTGACTAGGAGGCAGTCCAG

>499

ACTTCTCCTGAAAGGTGGAGCCCAGGAGAGGTCAAAGATGTGGGAAGTAGGAAAAAC  
CAAAGAGAAGGAAGTTCTAAGCCATCACAGTCACTGTTATTGACTAGGAGGCAGTCCA  
GTTTAAAGTAGAGGCAGTTGGGGTT

>500

GGAGCCCAGGAGAGGTCAAAGATGTGGGAAGTAGGAAAAACCAAAGAGAAGGAAGT  
TCTAAGCCATCACAGTCACTGTTATTGACTAGGAGGCAGTCCAGTTTAAAGTAGAGGC  
AGTTGGGGTTGGTGGGGAGGGAGAGC

>501

TGGGAAGTAGGAAAAACCAAAGAGAAGGAAGTTCTAAGCCATCACAGTCACTGTTAT  
TGA CTAGGAGGCAGTCCAGTTTAAAGTAGAGGCAGTTGGGGTTGGTGGGGAGGGAGA  
GCTATCAGTTGGGGGACCTGAACTAG

>502

GAGAAGGAAGTTCTAAGCCATCACAGTCACTGTTATTGACTAGGAGGCAGTCCAGTTT  
AAAGTAGAGGCAGTTGGGGTTGGTGGGGAGGGAGAGCTATCAGTTGGGGGACCTGAA

CTAGAGGTACCACTGAGATGAAAAC

>503

GAAGTTCTAAGCCATCACAGTCACTGTTATTGACTAGGAGGCAGTCCAGTTTAAAGTA  
GAGGCAGTTGGGGTTGGTGGGGAGGGAGAGCTATCAGTTGGGGGACCTGAACTAGAG  
GTACCACTGAGATGAAAACCACTAT

>504

TGTTATTGACTAGGAGGCAGTCCAGTTTAAAGTAGAGGCAGTTGGGGTTGGTGGGGAG  
GGAGAGCTATCAGTTGGGGGACCTGAACTAGAGGTACCACTGAGATGAAAACCACTAT  
GGTAGGGGTAAAAGGCAGCTAGGA

>505

TGGGGTTGGTGGGGAGGGAGAGCTATCAGTTGGGGGACCTGAACTAGAGGTACCACT  
GAGATGAAAACCACTATGGTAGGGGTAAAAGGCAGCTAGGAGATTCCATGTCCTGGGA  
ATCTCTGGAAACTGCTCACTCTGTA

>506

TTGGTGGGGAGGGAGAGCTATCAGTTGGGGGACCTGAACTAGAGGTACCACTGAGAT  
GAAAACCACTATGGTAGGGGTAAAAGGCAGCTAGGAGATTCCATGTCCTGGGAATCTC  
TGGAACCTGCTCACTCTGTATTCCT

>507

ACCTGAACTAGAGGTACCACTGAGATGAAAACCACTATGGTAGGGGTAAAAGGCAGCT  
AGGAGATTCCATGTCCTGGGAATCTCTGGAAACTGCTCACTCTGTATTCCTCATTTC  
CAACCACTATCTGGACCAGATCCGC

>508

CCAGTATGGTAGGGGTAAAAGGCAGCTAGGAGATTCCATGTCCTGGGAATCTCTGGAA  
ACTGCTCACTCTGTATTCCTCATTTCCAACCACTATCTGGACCAGATCCGCCAGACAAT  
CTTTGAAAACCTGAAGATGCTGA

>509

GGCAGCTAGGAGATTCCATGTCCTGGGAATCTCTGGAAACTGCTCACTCTGTATTCCTC  
ATTTCCAACCACTATCTGGACCAGATCCGCCAGACAATCTTTGAAAACCTGAAGATGCT  
GAACCATGCACCTAGTGTCCAG

>510

TCCAACCACTATCTGGACCAGATCCGCCAGACAATCTTTGAAAACCTGAAGATGCTGA  
ACCATGCACCTAGTGTCCAGATTCATGACGTGCCTGCAGACCTCCTGACCTATGACAGG  
ACTGATGAGGCTGATGCAGAGGA

>511

CAACCACTATCTGGACCAGATCCGCCAGACAATCTTTGAAAACCTGAAGATGCTGAAC  
CATGCACCTAGTGTCCAGATTCATGACGTGCCTGCAGACCTCCTGACCTATGACAGGAC  
TGATGAGGCTGATGCAGAGGAGA

>512

CCAGATCCGCCAGACAATCTTTGAAAACCTGAAGATGCTGAACCATGCACCTAGTGTG  
CAGATTCATGACGTGCCTGCAGACCTCCTGACCTATGACAGGACTGATGAGGCTGATG  
CAGAGGAGAGGGGTCCTGAGGAGA

>513

CAGATTCATGACGTGCCTGCAGACCTCCTGACCTATGACAGGACTGATGAGGCTGATG  
CAGAGGAGAGGGGTCCTGAGGAGAACTATAGCAGGTCTGGGAGCAGGGACTTCAGCC

TACTTTCAATAGGCTTGCTGGGGAG

>514

GTCCTGAGGAGAACTATAGCAGGTCTGGGAGCAGGGACTTCAGCCTACTTTCAATAGG  
CTTGCTGGGGAGGTTTAAAAGGGAAAAAGTAAATGGGAAGGTATTAGTTTAATTGCCT  
CTGGCTTACCTCCTTTAGTCTGCT

>515

TAGCAGGTCTGGGAGCAGGGACTTCAGCCTACTTTCAATAGGCTTGCTGGGGAGGTTT  
AAAAGGGAAAAAGTAAATGGGAAGGTATTAGTTTAATTGCCTCTGGCTTACCTCCTTTA  
GTCTGCTACAATTCCTCACTCT

>516

GGACTTCAGCCTACTTTCAATAGGCTTGCTGGGGAGGTTTAAAAGGGAAAAAGTAAAT  
GGGAAGGTATTAGTTTAATTGCCTCTGGCTTACCTCCTTTAGTCTGCTACAATTCCTCA  
CTCTTTTCTTTGTTATTTTAA

>517

TGGGGAGGTTTAAAAGGGAAAAAGTAAATGGGAAGGTATTAGTTTAATTGCCTCTGGC  
TTACCTCCTTTAGTCTGCTACAATTCCTCACTCTTTTCTTTGTTATTTTAATGACAAAA  
GTAACACGTATTTATTGCAA

>518

GGAAGGTATTAGTTTAATTGCCTCTGGCTTACCTCCTTTAGTCTGCTACAATTCCTCAC  
TCTTTTCTTTGTTATTTTAATGACAAAAGTAACACGTATTTATTGCAAATTTTAAAC  
AGCACCAAATATGGTGTTG

>519

GCCTCTGGCTTACCTCCTTTAGTCTGCTACAATTCCTCACTCTTTTCTTTGTTATTTTIA  
ATGACAAAAGTAACACGTATTTATTGCAAATTTTAAACAGCACCAAATATGGTGTT  
GGCGTTCACACAATCCCAGA

>520

GCTTACCTCCTTTAGTCTGCTACAATTCCTCACTCTTTTCTTTGTTATTTTAAATGACAA  
AAGTAACACGTATTTATTGCAAATTTTAAACAGCACCAAATATGGTGTTGGCGTTC  
ACACAATCCCAGACCTATTC

>521

TTCTTTGTTATTTTAAATGACAAAAGTAACACGTATTTATTGCAAATTTTAAACAGCA  
CCAAAATATGGTGTTGGCGTTCACACAATCCCAGACCTATTCCACAGGAGTAACCACTG  
TTAATAGTTTTTATTGTTTTG

>522

TTGCAAATTTTAAACAGCACCAAATATGGTGTTGGCGTTCACACAATCCCAGACCT  
ATTCCACAGGAGTAACCACTGTTAATAGTTTTTATTGTTTTGGATAGACCTTTTTCTATAG  
ATTGCAAATATACTATTCTG

>523

TTTAAACAGCACCAAATATGGTGTTGGCGTTCACACAATCCCAGACCTATTCCACAG  
GAGTAACCACTGTTAATAGTTTTTATTGTTTTGGATAGACCTTTTTCTATAGATTGCAAAT  
ATACTATTCTGTATGTACAT

>524

AGTAACCACTGTTAATAGTTTTTATTGTTTTGGATAGACCTTTTTCTATAGATTGCAAATA  
TACTATTCTGTATGTACATATAAACAAACACATATACACTCATTTACAGTTTGTGTGGTTT

TTGGTTTTTCCGTAAATA

>525

ACCACTGTTAATAGTTTTTATTGTTTTGGATAGACCTTTTTCTATAGATTGCAAATATACT  
ATTCTGTATGTACATATAAAACAAACACATATACACTCATTTACAGTTTGTGTGGTTTTTG  
TTTTTCCGTAAATACAAA

>526

CTTTTTCTATAGATTGCAAATATACTATTCTGTATGTACATATAAAACAAACACATATACAC  
TCATTTACAGTTTGTGTGGTTTTTGGTTTTTCCGTAAATACAAATAGGGTCATTCTACGT  
ATGCTGCTTTACATCATAT

>527

TTCTATAGATTGCAAATATACTATTCTGTATGTACATATAAAACAAACACATATACACTCAT  
TTACAGTTTGTGTGGTTTTTGGTTTTTCCGTAAATACAAATAGGGTCATTCTACGTATGC  
TGCTTTACATCATATAGCT

>528

CTATTCTGTATGTACATATAAAACAAACACATATACACTCATTTACAGTTTGTGTGGTTTTT  
GGTTTTTCCGTAAATACAAATAGGGTCATTCTACGTATGCTGCTTTACATCATATAGCTGT  
TTTCAGCTAGCTAATATA

>529

ACACATATACACTCATTTACAGTTTGTGTGGTTTTTGGTTTTTCCGTAAATACAAATAGG  
GTCATTCTACGTATGCTGCTTTACATCATATAGCTGTTTTTCAGCTAGCTAATATAGATCTG  
CTTCAGTATTTTATCAGCT

>530

GTGTGGTTTTTGGTTTTTCCGTAAATACAAATAGGGTCATTCTACGTATGCTGCTTTACA  
TCATATAGCTGTTTTTCAGCTAGCTAATATAGATCTGCTTCAGTATTTTATCAGCTGTATAAT  
AATTTACTATGTGGATAG

>531

TAGGGTCATTCTACGTATGCTGCTTTACATCATATAGCTGTTTTTCAGCTAGCTAATATAGA  
TCTGCTTCAGTATTTTATCAGCTGTATAATAATTTACTATGTGGATAGATTATTTTCCATTT  
TTTTGGTATTACAATAA

>532

GTATGCTGCTTTACATCATATAGCTGTTTTTCAGCTAGCTAATATAGATCTGCTTCAGTATT  
TTATCAGCTGTATAATAATTTACTATGTGGATAGATTATTTTCCATTTTTTTGGTATTACAA  
TAATAATGTGGCAATGA

>533

ATATAGCTGTTTTTCAGCTAGCTAATATAGATCTGCTTCAGTATTTTATCAGCTGTATAATAA  
TTTACTATGTGGATAGATTATTTTCCATTTTTTTGGTATTACAATAATAATGTGGCAATGA  
ACCCCTTACATTATAC

>534

AGATCTGCTTCAGTATTTTATCAGCTGTATAATAATTTACTATGTGGATAGATTATTTTCCA  
TTTTTTTGGTATTACAATAATAATGTGGCAATGAACCCCTTACATTATACATCTTTGCAT  
TCTTGTGTTGAGTGGGTT

>535

TTTATCAGCTGTATAATAATTTACTATGTGGATAGATTATTTTCCATTTTTTTGGTATTACA  
ATAATAATGTGGCAATGAACCCCTTACATTATACATCTTTGCATTCTTGTGTTGAGTGGG

TTAGATAGTAGAATGGTT

>536

TTCCATTTTTTTTGGTATTACAATAATAATGTGGCAATGAACCCCCCTTACATTATACATCTT  
TGCATTCTTGTTTGTAGTGGGTTAGATAGTAGAATGGTTGCTGCTAGGTCAAAGGCTGTG  
TGCATTAATTTTTTTTTTTTT

>537

TTTTTTGGTATTACAATAATAATGTGGCAATGAACCCCCCTTACATTATACATCTTTGCATT  
CTTGTTTGTAGTGGGTTAGATAGTAGAATGGTTGCTGCTAGGTCAAAGGCTGTGTGCATT  
AATTTTTTTTTTTTTTTTTTTT

>538

TTGGTATTACAATAATAATGTGGCAATGAACCCCCCTTACATTATACATCTTTGCATTCTTG  
TTTGAGTGGGTTAGATAGTAGAATGGTTGCTGCTAGGTCAAAGGCTGTGTGCATTAATT  
TTTTTTTTTTTTTTTTTTTT

>539

ACAATAATAATGTGGCAATGAACCCCCCTTACATTATACATCTTTGCATTCTTGTTTGTAGT  
GGGTTAGATAGTAGAATGGTTGCTGCTAGGTCAAAGGCTGTGTGCATTAATTTTTTTTTTT  
TTTTTTTTTTTTTGAGATGGA

>540

GAACCCCCCTTACATTATACATCTTTGCATTCTTGTTTGTAGTGGGTTAGATAGTAGAATGG  
TTGCTGCTAGGTCAAAGGCTGTGTGCATTAATTTTTTTTTTTTTTTTTTTTTTTTGAGATGG  
AGTCTCACTCTGTTGCCAGG

>541

GTAGAATGGTTGCTGCTAGGTCAAAGGCTGTGTGCATTAATTTTTTTTTTTTTTTTTTTTTTT  
TGAGATGGAGTCTCACTCTGTTGCCAGGCTGGAGTGCAGTGGCTAATCCCGGCTCACT  
GCAACCTCCGCCTCCCAGGTT

>542

TGCTGCTAGGTCAAAGGCTGTGTGCATTAATTTTTTTTTTTTTTTTTTTTTTTTGAGATGGA  
GTCTCACTCTGTTGCCAGGCTGGAGTGCAGTGGCTAATCCCGGCTCACTGCAACCTCC  
GCCTCCCAGGTTCAAGCGATTC

>543

GGAGTCTCACTCTGTTGCCAGGCTGGAGTGCAGTGGCTAATCCCGGCTCACTGCAACC  
TCCGCCTCCCAGGTTCAAGCGATTCTCCTGCCTCAGCCTCCTCAGTAGCTGAGATTACA  
GGCATGTGCCACCACACCCGGCT

>544

GTGGCTAATCCCGGCTCACTGCAACCTCCGCCTCCCAGGTTCAAGCGATTCTCCTGCCT  
CAGCCTCCTCAGTAGCTGAGATTACAGGCATGTGCCACCACACCCGGCTAACTTTAGTA  
TTTTTAGTAGAGACGGGGTTTC

>545

GCAACCTCCGCCTCCCAGGTTCAAGCGATTCTCCTGCCTCAGCCTCCTCAGTAGCTGA  
GATTACAGGCATGTGCCACCACACCCGGCTAACTTTAGTATTTTTAGTAGAGACGGGGT  
TTCACCATGTTGGCCAGGATGGT

>546

CGATTCTCCTGCCTCAGCCTCCTCAGTAGCTGAGATTACAGGCATGTGCCACCACACCC  
GGCTAACTTTAGTATTTTTAGTAGAGACGGGGTTTCACCATGTTGGCCAGGATGGTCTT



GATCTCTTGACCTTGTGATCCA

>547

CCTCAGTAGCTGAGATTACAGGCATGTGCCACCACACCCGGCTAACTTTAGTATTTTAA  
GTAGAGACGGGGTTTCACCATGTTGGCCAGGATGGTCTTGATCTCTTGACCTTGTGATC  
CACCTGCCTTGGCCTCCCAAAG

>548

TGAGATTACAGGCATGTGCCACCACACCCGGCTAACTTTAGTATTTTAAAGTAGAGACGG  
GGTTTCACCATGTTGGCCAGGATGGTCTTGATCTCTTGACCTTGTGATCCACCTGCCTT  
GGCCTCCCAAAGTGCTGGGATT

>549

ATGTGCCACCACACCCGGCTAACTTTAGTATTTTAAAGTAGAGACGGGGTTTCACCATGT  
TGGCCAGGATGGTCTTGATCTCTTGACCTTGTGATCCACCTGCCTTGGCCTCCCAAAGT  
GCTGGGATTACAGGTGTGAGCT

>550

GGTTTCACCATGTTGGCCAGGATGGTCTTGATCTCTTGACCTTGTGATCCACCTGCCTT  
GGCCTCCCAAAGTGCTGGGATTACAGGTGTGAGCTACCACGCCCGGCTTTTGAGAATA  
CTTTTCAAAAAGAAAGAAACCA

>551

GCCAGGATGGTCTTGATCTCTTGACCTTGTGATCCACCTGCCTTGGCCTCCCAAAGTGC  
TGGGATTACAGGTGTGAGCTACCACGCCCGGCTTTTGAGAATACTTTTCAAAAAGAA  
AGAAACCAATATTGAGTACCTGT

>552

GATTACAGGTGTGAGCTACCACGCCCGGCTTTTGAGAATACTTTTCAAAAAGAAAGA  
AACCAATATTGAGTACCTGTTGGGCCCTGTTTGTCTTTCACATCCATTCTTTCACTATGG  
GTTTATAATACCACGTCACTCT

>553

AGGTGTGAGCTACCACGCCCGGCTTTTGAGAATACTTTTCAAAAAGAAAGAAACCAA  
TATTGAGTACCTGTTGGGCCCTGTTTGTCTTTCACATCCATTCTTTCACTATGGGTTTATA  
ATACCACGTCACTCTTCTTAA

>554

AAAAGAAAGAAACCAATATTGAGTACCTGTTGGGCCCTGTTTGTCTTTCACATCCATTC  
TTTCACTATGGGTTTATAATACCACGTCACTCTTCTTAAATTAATACTCTCCTTTACCTT  
GCACTTAGAAGAAAATCCAA

>555

AATATTGAGTACCTGTTGGGCCCTGTTTGTCTTTCACATCCATTCTTTCACTATGGGTTTA  
TAATACCACGTCACTCTTCTTAAATTAATACTCTCCTTTACCTTGCACTTAGAAGAAA  
ATCCAAAATTTGACTGTGG

>556

CCACGTCACTCTTCTTAAATTAATACTCTCCTTTACCTTGCACTTAGAAGAAAATCCA  
AAATTTTGACTGTGGCTTAAAGAGTCTGCTAGCCCTTACCTACATCCAGGATC  
TCATCTCTAACTACTCTCCTCC

>557

CTTAAATTAATACTCTCCTTTACCTTGCACTTAGAAGAAAATCCAAAATTTTGACTGT  
GGCTTAAAGAGTCTGCTAGCCCTTACCTACATCCAGGATCTCATCTCTAACTA

CTCTCCTCCATGCACAGTGCTC

>558

AAAAAGGTCCTGCATGCTAGCCCTTACCTACATCCAGGATCTCATCTCTAACTACTCTCC  
TCCATGCACAGTGCTCCCGGCTGTCCTGGCCTCCTTGTTCTTACTGGAATACATCAGTC  
TCTTTCCATTTTCATGACCTCT

>559

CATGCTAGCCCTTACCTACATCCAGGATCTCATCTCTAACTACTCTCCTCCATGCACAGT  
GCTCCCGGCTGTCCTGGCCTCCTTGTTCTTACTGGAATACATCAGTCTCTTTCCATTTCA  
TGACCTCTGTAGTTGGTTTT

>560

CCTACATCCAGGATCTCATCTCTAACTACTCTCCTCCATGCACAGTGCTCCCGGCTGTCC  
TGGCCTCCTTGTTCTTACTGGAATACATCAGTCTCTTTCCATTTTCATGACCTCTGTAGTT  
GGTTTTCTTGCAGCTTGGAA

>561

TCTAACTACTCTCCTCCATGCACAGTGCTCCCGGCTGTCCTGGCCTCCTTGTTCTTACTG  
GAATACATCAGTCTCTTTCCATTTTCATGACCTCTGTAGTTGGTTTTCTTGCAGCTTGGAA  
TGGCCTTCCTGAAGTCTTTG

>562

GTGCTCCCGGCTGTCCTGGCCTCCTTGTTCTTACTGGAATACATCAGTCTCTTTCCATTT  
CATGACCTCTGTAGTTGGTTTTCTTGCAGCTTGGAAATGGCCTTCCTGAAGTCTTTGCCT  
GCTTAGCTCCTCCTCAGACTT

>563

CTCCCGGCTGTCCTGGCCTCCTTGTTCTTACTGGAATACATCAGTCTCTTTCCATTTTCAT  
GACCTCTGTAGTTGGTTTTCTTGCAGCTTGGAAATGGCCTTCCTGAAGTCTTTGCCTGCT  
TAGCTCCTCCTCAGACTTTAG

>564

TACATCAGTCTCTTTCCATTTTCATGACCTCTGTAGTTGGTTTTCTTGCAGCTTGGAAATGG  
CCTTCCTGAAGTCTTTGCCTGCTTAGCTCCTCCTCAGACTTTAGGTCTTATGTCCCAATA  
GTCCTGTCTGAAATTTACCC

>565

GTTGGTTTTCTTGCAGCTTGGAAATGGCCTTCCTGAAGTCTTTGCCTGCTTAGCTCCTCC  
TCAGACTTTAGGTCTTATGTCCCAATAGTCCTGTCTGAAATTTACCCCTTTTCCTCTCAT  
CACCTTCAGTCCTATCACTTC

>566

TTCTTGCAGCTTGGAAATGGCCTTCCTGAAGTCTTTGCCTGCTTAGCTCCTCCTCAGACT  
TTAGGTCTTATGTCCCAATAGTCCTGTCTGAAATTTACCCCTTTTCCTCTCATCACCTTC  
AGTCCTATCACTTCATTTTAT

>567

CCTCAGACTTTAGGTCTTATGTCCCAATAGTCCTGTCTGAAATTTACCCCTTTTCCTCTC  
ATCACCTTCAGTCCTATCACTTCATTTTATTAATTGTACTCTCCATCATCTGAAATTATTAT  
ATTTATTTACTTTGTTAG

>568

AATAGTCCTGTCTGAAATTTACCCCTTTTCCTCTCATCACCTTCAGTCCTATCACTTCAT  
TTTATTAATTGTACTCTCCATCATCTGAAATTATTATTTATTTACTTTGTTAGTTACTAGT

CTCATTTATTAGGTAAG

>569

CTTCAGTCCTATCACTTCATTTTATTAATTGTACTCTCCATCATCTGAAATTATTATATTTA  
TTTACTTTGTTAGTTACTAGTCTCATTTATTAGGTAAGCTTTTTGAGGATAGACAACCTT  
GTCCAGCTTGTTACTCTA

>570

AGTCCTATCACTTCATTTTATTAATTGTACTCTCCATCATCTGAAATTATTATATTTATTTA  
CTTTGTTAGTTACTAGTCTCATTTATTAGGTAAGCTTTTTGAGGATAGACAACCTTGTCC  
AGCTTGTTACTCTACTGT

>571

ATTATATTTATTTACTTTGTTAGTTACTAGTCTCATTTATTAGGTAAGCTTTTTGAGGATAG  
ACAACCTTGTCCAGCTTGTTACTCTACTGTATTGCTAAGGTTTATGACAGTGTCTGTATA  
GAGTAGTTCCTTAATGTT

>572

ATTACTTTGTTAGTTACTAGTCTCATTTATTAGGTAAGCTTTTTGAGGATAGACAACCTT  
GTCCAGCTTGTTACTCTACTGTATTGCTAAGGTTTATGACAGTGTCTGTATAGAGTAGTT  
CCTTAATGTTTATTTGATA

>573

CTCATTTATTAGGTAAGCTTTTTGAGGATAGACAACCTTGTCCAGCTTGTTACTCTACTG  
TATTGCTAAGGTTTATGACAGTGTCTGTATAGAGTAGTTCCTTAATGTTTATTTGATACGT  
GAATGGGTGAATGAATAGC

>574

GTAAGCTTTTTGAGGATAGACAACCTTGTCCAGCTTGTTACTCTACTGTATTGCTAAGG  
TTTATGACAGTGTCTGTATAGAGTAGTTCCTTAATGTTTATTTGATACGTGAATGGGTGA  
ATGAATAGCAGTCTCTACCAA

>575

GCTTTTTGAGGATAGACAACCTTGTCCAGCTTGTTACTCTACTGTATTGCTAAGGTTTAT  
GACAGTGTCTGTATAGAGTAGTTCCTTAATGTTTATTTGATACGTGAATGGGTGAATGAA  
TAGCAGTCTCTACCAACAAG

>576

GAGGATAGACAACCTTGTCCAGCTTGTTACTCTACTGTATTGCTAAGGTTTATGACAGT  
GTCTGTATAGAGTAGTTCCTTAATGTTTATTTGATACGTGAATGGGTGAATGAATAGCAG  
TCTCTACCAACAAGAGGAGGA

>577

CTTGTCAGCTTGTTACTCTACTGTATTGCTAAGGTTTATGACAGTGTCTGTATAGAGTA  
GTTTCCTTAATGTTTATTTGATACGTGAATGGGTGAATGAATAGCAGTCTCTACCAACAAG  
AGGAGGAGTGTTCTCAACG

>578

TTTATGACAGTGTCTGTATAGAGTAGTTCCTTAATGTTTATTTGATACGTGAATGGGTGA  
ATGAATAGCAGTCTCTACCAACAAGAGGAGGAGTGGTTCTCAACGGGGCCTGAGAAA  
TGGCTTTGGAAAAGGGTGCTGGG

>579

GTAGTTCCTTAATGTTTATTTGATACGTGAATGGGTGAATGAATAGCAGTCTCTACCAAC  
AAGAGGAGGAGTGGTTCTCAACGGGGCCTGAGAAATGGCTTTGGAAAAGGGTGCTGG

GAGAAGATTAGAACTTAGAGTGA

>580

GTTCTTAATGTTTATTTGATACGTGAATGGGTGAATGAATAGCAGTCTCTACCAACAAG  
AGGAGGAGTGGTTCTCAACGGGGCCTGAGAAATGGCTTTGGAAAAGGGTGCTGGGAG  
AAGATTAGAACTTAGAGTGAGAT

>581

GAATAGCAGTCTCTACCAACAAGAGGAGGAGTGGTTCTCAACGGGGCCTGAGAAATG  
GCTTTGGAAAAGGGTGCTGGGAGAAGATTAGAACTTAGAGTGAGATCCTGACCTCTCT  
CCCCTTGCTTTGCAGGCCAGAGGCA

>582

AGGAGTGGTTCTCAACGGGGCCTGAGAAATGGCTTTGGAAAAGGGTGCTGGGAGAAG  
ATTAGAACTTAGAGTGAGATCCTGACCTCTCTCCCCTTGCTTTGCAGGCCAGAGGCAC  
CCAATGAGTTCTATGATGGAGACCA

>583

AGAAGATTAGAACTTAGAGTGAGATCCTGACCTCTCTCCCCTTGCTTTGCAGGCCAGA  
GGCACCCAATGAGTTCTATGATGGAGACCATGACAATGACAAGGAAAGCGATGTGGAG  
ATTTAAGAGTGGCTTGGGATGCTG

>584

CTTGCTTTGCAGGCCAGAGGCACCCAATGAGTTCTATGATGGAGACCATGACAATGAC  
AAGGAAAGCGATGTGGAGATTTAAGAGTGGCTTGGGATGCTGTGTCCCAAGGAATTTT  
TTTTACCTCTTGTTGGGCTGGA

>585

CAGAGGCACCCAATGAGTTCTATGATGGAGACCATGACAATGACAAGGAAAGCGATGT  
GGAGATTTAAGAGTGGCTTGGGATGCTGTGTCCCAAGGAATTTCTTTTCACCTCTTGGT  
TGGGCTGGAGGGAAAAGGAGTGG

>586

AGTTCTATGATGGAGACCATGACAATGACAAGGAAAGCGATGTGGAGATTTAAGAGTG  
GCTTGGGATGCTGTGTCCCAAGGAATTTCTTTTCACCTCTTGGTTGGGCTGGAGGGAA  
AAGGAGTGGCTCCTAGAGTCCTGG

>587

AAGAGTGGCTTGGGATGCTGTGTCCCAAGGAATTTCTTTTCACCTCTTGGTTGGGCTG  
GAGGGAAAAGGAGTGGCTCCTAGAGTCCTGGGGGTACCCCAGGGCTTTTGCTGACT  
CTGGGAAAGAGTCTGGAGACCACAT

>588

GGATGCTGTGTCCCAAGGAATTTCTTTTCACCTCTTGGTTGGGCTGGAGGGAAAAGGA  
GTGGCTCCTAGAGTCCTGGGGGTACCCCAGGGCTTTTGCTGACTCTGGGAAAGAGTC  
TGGAGACCACATTTGGTTCTCGAA

>589

CTGGAGGGAAAAGGAGTGGCTCCTAGAGTCCTGGGGGTACCCCAGGGCTTTTGCTG  
ACTCTGGGAAAGAGTCTGGAGACCACATTTGGTTCTCGAACCATCTACCTGCTTTTCCT  
CTCTCTCCCAAGGCCTGACAATGG

>590

GCTCCTAGAGTCCTGGGGGTACCCCAGGGCTTTTGCTGACTCTGGGAAAGAGTCTGG  
AGACCACATTTGGTTCTCGAACCATCTACCTGCTTTTCCTCTCTCTCCCAAGGCCTGAC

AATGGTACCTATTAGGGATGAGA

>591

AGTCTGGAGACCACATTTGGTTCTCGAACCATCTACCTGCTTTTCCTCTCTCTCCCAAG  
GCCTGACAATGGTACCTATTAGGGATGAGATACAGACAAGGATAGCTATCTGGGACATT  
ATTGGCAGTGGGCCCTGGAGGC

>592

CAAGGCCTGACAATGGTACCTATTAGGGATGAGATACAGACAAGGATAGCTATCTGGG  
ACATTATTGGCAGTGGGCCCTGGAGGCCAGTCCCTAGCCCCCCTTGCCCCCTATTTCCT  
CCCTGCTTCCCTCGAACCCAGAG

>593

ACCTATTAGGGATGAGATACAGACAAGGATAGCTATCTGGGACATTATTGGCAGTGGGC  
CCTGGAGGCCAGTCCCTAGCCCCCCTTGCCCCCTATTTCCTTCCCTGCTTCCCTCGAACC  
CAGAGATTTTTGAGGGATGAAC

>594

CCCTAGCCCCCCTTGCCCCCTATTTCCTTCCCTGCTTCCCTCGAACCCAGAGATTTTTGAG  
GGATGAACGGGTAGACAAGGACTGAGATTGCCTCTGACTTCCTCCTCCCCTGGGTTCT  
GACTTCTTCCCTCCCCTTGCTTC

>595

ACCCAGAGATTTTTGAGGGATGAACGGGTAGACAAGGACTGAGATTGCCTCTGACTTC  
CTCCTCCCCTGGGTTCTGACTTCTTCCCTCCCCTTGCTTCCAGGGAAGATGAAGAGAGA  
GAGATTTGGAAGGGGCTCTGGCTC

>596

GGGAAGATGAAGAGAGAGAGATTTGGAAGGGGCTCTGGCTCCCTAACACCTGAATCC  
CAGATGATGGGAAGTATGTTTTCAAGTGTGGGGAGGATATGAAAATGTTCTGTTCTCAC  
TTTTGGCTTTATGTCCATTTTACC

>597

AGATGAAGAGAGAGAGATTTGGAAGGGGCTCTGGCTCCCTAACACCTGAATCCCAGAT  
GATGGGAAGTATGTTTTCAAGTGTGGGGAGGATATGAAAATGTTCTGTTCTCACTTTTG  
GCTTTATGTCCATTTTACCACTG

>598

TCTGGCTCCCTAACACCTGAATCCCAGATGATGGGAAGTATGTTTTCAAGTGTGGGGA  
GGATATGAAAATGTTCTGTTCTCACTTTTGGCTTTATGTCCATTTTACCACTGTTTTTATC  
CAATAAACTAAGTCGGTATTT

>599

GGTGAAATCCCAGCTCAGGTGTTATATCCTTGCTGCTTCTGACAAATGAAACCAAGGTG  
TATTAATTAAGGTAATGCTAGCTACTACAATAAGCTGAAAAATATATAATAGCTAAAAGC  
TAGGGTGCCAGATTTAGGAAA

>600

AAGGTGTATTAATTAAGGTAATGCTAGCTACTACAATAAGCTGAAAAATATATAATAGCT  
AAAAGCTAGGGTGCCAGATTTAGGAAAATAAAAACAAAACAAAAACAATTGAAATTT  
GAATTTTCAGATAAACAATTTTTT

>601

GCCAGATTTAGGAAAATAAAAACAAAACAAAAACAATTGAAATTTGAATTTTCAGATAA  
ACAATTTTTTTTAGTATAATTATGTCCCATGCAATATTTGAGACATACTAAAAGGTTATTCA

TTGTTTATCTGATATTCAAAT

>602

GGAAAATAAAAACAAACAAAAACAATTGAAATTTGAATTCAGATAAACAATTTTTTT  
AGTATAATTATGTCCCATGCAATATTTGAGACATACTAAAAGGTTATTCATTGTTTATCTG  
ATATTCAAATTTAACATTTT

>603

ATTTGAATTCAGATAAACAATTTTTTTTAGTATAATTATGTCCCATGCAATATTTGAGACA  
TACTAAAAGGTTATTCATTGTTTATCTGATATTCAAATTTAACATTTTCATTAATTTATTTT  
ATTTGGCAGCCCTATGG

>604

CAGATAAACAATTTTTTTTAGTATAATTATGTCCCATGCAATATTTGAGACATACTAAAAG  
GTTATTCATTGTTTATCTGATATTCAAATTTAACATTTTCATTAATTTATTTTATTTGGCAG  
CCCTATGGAAGACATCAA

>605

TTATCTGATATTCAAATTTAACATTTTCATTAATTTATTTTATTTGGCAGCCCTATGGAAGA  
CATCAAAAGTTTATTTCTTATTTATATAAAGTCCAAAATAGATGTTTTTTAGTAGGCAGG  
CAGCTCTTCTCTAAGCGT

>606

ATTTTCATTAATTTATTTTATTTGGCAGCCCTATGGAAGACATCAAAAGTTTATTTCTTAT  
TTATATAAAGTCCAAAATAGATGTTTTTTAGTAGGCAGGCAGCTCTTCTCTAAGCGTAAT  
TCAGGGCTCTGGGTTCTGT

>607

TATTTTATTTGGCAGCCCTATGGAAGACATCAAAAGTTTATTTCTTATTTATATAAAGTCC  
AAAATAGATGTTTTTTAGTAGGCAGGCAGCTCTTCTCTAAGCGTAATTCAGGGCTCTGG  
GTTCTGTCCATCCTGGCCCT

>608

TTGGCAGCCCTATGGAAGACATCAAAAGTTTATTTCTTATTTATATAAAGTCCAAAATAG  
ATGTTTTTTAGTAGGCAGGCAGCTCTTCTCTAAGCGTAATTCAGGGCTCTGGGTTCTGT  
CCATCCTGGCCCTGACGTCTT

>609

AAGTTTATTTCTTATTTATATAAAGTCCAAAATAGATGTTTTTTAGTAGGCAGGCAGCTC  
TTCTCTAAGCGTAATTCAGGGCTCTGGGTTCTGTCCATCCTGGCCCTGACGTCTTTCATT  
GCTCAGCTTCTAAGATAGCT

>610

TTTTAGTAGGCAGGCAGCTCTTCTCTAAGCGTAATTCAGGGCTCTGGGTTCTGTCCATC  
CTGGCCCTGACGTCTTTCATTGCTCAGCTTCTAAGATAGCTCTATGCTCATGGGGTCAA  
GTCACAGGAAAGAAAAGGGAAT

>611

CTGGGTTCTGTCCATCCTGGCCCTGACGTCTTTCATTGCTCAGCTTCTAAGATAGCTCTA  
TGCTCATGGGGTCAAGTCACAGGAAAGAAAAGGGAATGTGGAGTTCCACTTGGGAGT  
TTTTATGGGCCAGTCCTGGAAGC

>612

TTCTGTCCATCCTGGCCCTGACGTCTTTCATTGCTCAGCTTCTAAGATAGCTCTATGCTC  
ATGGGGTCAAGTCACAGGAAAGAAAAGGGAATGTGGAGTTCCACTTGGGAGTTTTTAT

GGGCCAGTCCTGGAAGCGGCAC

>613

GTCTTTCATTGCTCAGCTTCTAAGATAGCTCTATGCTCATGGGGTCAAGTCACAGGAAA  
GAAAAGGGAATGTGGAGTTCCACTTGGGAGTTTTTATGGGCCAGTCCTGGAAGCGGCA  
CAGAGGATTTCTGCTCACAATCT

>614

TCTAAGATAGCTCTATGCTCATGGGGTCAAGTCACAGGAAAGAAAAGGGAATGTGGAG  
TTCCACTTGGGAGTTTTTATGGGCCAGTCCTGGAAGCGGCACAGAGGATTTCTGCTCA  
CAATCTATTGGCCAGAACTCAATC

>615

GCGGCACAGAGGATTTCTGCTCACAATCTATTGGCCAGAACTCAATCACATGGCCTGC  
ACCTAACTGCAAGTTAAGCCAGAAAAATGTAGGTGTGCCCAGGAAGAAGTTTGGGGA  
ACAGCTAGCCAGTCTCTGCCACACC

>616

CTGCTCACAATCTATTGGCCAGAACTCAATCACATGGCCTGCACCTAACTGCAAGTTAA  
GCCAGAAAAATGTAGGTGTGCCCAGGAAGAAGTTTGGGGAACAGCTAGCCAGTCTCT  
GCCACACCTGGTAACAGCAGAGTG

>617

AGAACTCAATCACATGGCCTGCACCTAACTGCAAGTTAAGCCAGAAAAATGTAGGTGT  
GCCCAGGAAGAAGTTTGGGGAACAGCTAGCCAGTCTCTGCCACACCTGGTAACAGCA  
GAGTGAATCTGTCAGTACTCGTGCC

>618

GCACCTAACTGCAAGTTAAGCCAGAAAAATGTAGGTGTGCCCAGGAAGAAGTTTGGG  
GAACAGCTAGCCAGTCTCTGCCACACCTGGTAACAGCAGAGTGAATCTGTCAGTACTC  
GTGCCTAATGCGTGTCTCATATGCT

>619

TAAGCCAGAAAAATGTAGGTGTGCCCAGGAAGAAGTTTGGGGAACAGCTAGCCAGTC  
TCTGCCACACCTGGTAACAGCAGAGTGAATCTGTCAGTACTCGTGCCCTAATGCGTGTCT  
CATATGCTAGTGCTGGATTCAGTC

>620

TGTGCCCAGGAAGAAGTTTGGGGAACAGCTAGCCAGTCTCTGCCACACCTGGTAACA  
GCAGAGTGAATCTGTCAGTACTCGTGCCCTAATGCGTGTCTCATATGCTAGTGCTGGATT  
CAGTCAGCAGTCCTACATCCGCTG

>621

GGAACAGCTAGCCAGTCTCTGCCACACCTGGTAACAGCAGAGTGAATCTGTCAGTACT  
CGTGCCCTAATGCGTGTCTCATATGCTAGTGCTGGATTCAGTCAGCAGTCCTACATCCGCT  
GGGGTCCCTAGGAGGGGTCAGA

>622

AACAGCTAGCCAGTCTCTGCCACACCTGGTAACAGCAGAGTGAATCTGTCAGTACTCG  
TGCCTAATGCGTGTCTCATATGCTAGTGCTGGATTCAGTCAGCAGTCCTACATCCGCTG  
GGGTCCCTAGGAGGGGTCAGATG

>623

TCTCTGCCACACCTGGTAACAGCAGAGTGAATCTGTCAGTACTCGTGCCCTAATGCGTGT  
CTCATATGCTAGTGCTGGATTCAGTCAGCAGTCCTACATCCGCTGGGGTCCCTAGGAGG

GGTCAGATGCTCTCCTCTTTGC

>624

CAGTACTCGTGCCTAATGCGTGTCTCATATGCTAGTGCTGGATTCAAGTCAGCAGTCCTA  
CATCCGCTGGGGTCCCTAGGAGGGGTCAGATGCTCTCCTCTTTGCCCTGAACTGGTTAG  
CTACTTCGGACTGGGATGACAA

>625

TAATGCGTGTCTCATATGCTAGTGCTGGATTCAAGTCAGCAGTCCTACATCCGCTGGGGT  
CCCTAGGAGGGGTCAGATGCTCTCCTCTTTGCCCTGAACTGGTTAGCTACTTCGGACTG  
GGATGACAAGGCCATTGTGAGA

>626

TCAGTCAGCAGTCCTACATCCGCTGGGGTCCCTAGGAGGGGTCAGATGCTCTCCTCTTT  
GCCCTGAACTGGTTAGCTACTTCGGACTGGGATGACAAGGCCATTGTGAGAGTGATAA  
GCAATGTGATTCAAACAAATTCA

>627

GGAGGGGTCAGATGCTCTCCTCTTTGCCCTGAACTGGTTAGCTACTTCGGACTGGGAT  
GACAAGGCCATTGTGAGAGTGATAAGCAATGTGATTCAAACAAATTCAATTCACCTCAA  
TTCAATGCAGGTTTTTTTTTTTTT

>628

GTCAGATGCTCTCCTCTTTGCCCTGAACTGGTTAGCTACTTCGGACTGGGATGACAAGG  
CCATTGTGAGAGTGATAAGCAATGTGATTCAAACAAATTCAATTCACCTCAATTCAATG  
CAGGTTTTTTTTTTTTTTTTGAG

>629

TGACAAGGCCATTGTGAGAGTGATAAGCAATGTGATTCAAACAAATTCAATTCACCTCA  
ATTCAATGCAGGTTTTTTTTTTTTTTTTGAGACGGGCTGTCATGCTGTTGCCAACCCCTG  
AGAGCAGTGGCGCCATTACGGC

>630

GCAATGTGATTCAAACAAATTCAATTCACCTCAATTCAATGCAGGTTTTTTTTTTTTTTTT  
GAGACGGGCTGTCATGCTGTTGCCAACCCCTGGAGAGCAGTGGCGCCATTACGGCTCAC  
TGCAGCCTCCTGGGCTCAAGCA

>631

CTTCAATTCAATGCAGGTTTTTTTTTTTTTTTTGAGACGGGCTGTCATGCTGTTGCCAAC  
CTGGAGAGCAGTGGCGCCATTACGGCTCACTGCAGCCTCCTGGGCTCAAGCAATTCTC  
CCTCCTCAGCTTCCCAAGTAGC

>632

GAGCAGTGGCGCCATTACGGCTCACTGCAGCCTCCTGGGCTCAAGCAATTCTCCCTCC  
TCAGCTTCCCAAGTAGCTGGGACTACAGGTGCATGCCACCATGTTAGCTCATTATTT  
TTTATTTTTTTGTAGACAGGAGG

>633

ACGGCTCACTGCAGCCTCCTGGGCTCAAGCAATTCTCCCTCCTCAGCTTCCCAAGTAG  
CTGGGACTACAGGTGCATGCCACCATGTTAGCTCATTATTTTTATTTTTTTGTAGAC  
AGGAGGTCTCACTATGTTACCC

>634

TCAGCTTCCCAAGTAGCTGGGACTACAGGTGCATGCCACCATGTTAGCTCATTATTT  
TTTATTTTTTTGTAGACAGGAGGTCTCACTATGTTACCCAGGCTGCTGTCCAAGTCCTG



GGCTCACGTGATTCTCCCGCCT

>635

AGTAGCTGGGACTACAGGTGCATGCCACCATGTTTCAGCTCATTTATTTTTTATTTTTTTG  
TAGACAGGAGGTCTCACTATGTTACCCAGGCTGCTGTCCAAGTCCTGGGCTCACGTGA  
TTCTCCCGCCTCAGCCTCCCAA

>636

CACCATGTTTCAGCTCATTTATTTTTTATTTTTTTGTAGACAGGAGGTCTCACTATGTTACC  
CAGGCTGCTGTCCAAGTCCTGGGCTCACGTGATTCTCCCGCCTCAGCCTCCCAAAATG  
CTGGGATTACAGGCGTAAGCC

>637

ATTTTTTATTTTTTTGTAGACAGGAGGTCTCACTATGTTACCCAGGCTGCTGTCCAAGTC  
CTGGGCTCACGTGATTCTCCCGCCTCAGCCTCCCAAAATGCTGGGATTACAGGCGTAA  
GCCACCATGCCAGACAATTA

>638

GGCTGCTGTCCAAGTCCTGGGCTCACGTGATTCTCCCGCCTCAGCCTCCCAAAATGCT  
GGGATTACAGGCGTAAGCCACCATGCCAGACAATTTAATAAATATTTTAAAACTTCT  
AGGATATTGAGAAAAGCTTGGT

>639

TAAAACTTCTAGGATATTGAGAAAAGCTTGGTTCTAGGCCACTGGGGAAGACATCAAC  
TGAAACAGCCCAGTTATACTCTCAATTAGCTGTATACAATTAAATTCACAGATATCCTCA  
ACCCTTATCCATATCCCATTCA

>640

AGAAAAGCTTGGTTCTAGGCCACTGGGGAAGACATCAACTGAAACAGCCCAGTTATAC  
TCTCAATTAGCTGTATACAATTAAATTCACAGATATCCTCAACCCTTATCCATATCCCATT  
CATCTTTCAAAGGTTGGTGAA

>641

TAGCTGTATACAATTAAATTCACAGATATCCTCAACCCTTATCCATATCCCATTTCATCTTT  
CAAAGGTTGGTGAAAACCTCATAGCACAAAGAATTCTGCCCTAAATGTTTGAATACAG  
AATGGTCCCCTCTCTCCCTAA

>642

CTTATCCATATCCCATTTCATCTTTCAAAGGTTGGTGAAAACCTCATAGCACAAAGAATTC  
TGCCCTAAATGTTTGAATACAGAATGGTCCCCTCTCTCCCTAATTCCTAAAATATTTGGT  
CTCTATGTTTCATTCATTCAT

>643

TCATCTTTCAAAGGTTGGTGAAAACCTCATAGCACAAAGAATTCTGCCCTAAATGTTTG  
AATACAGAATGGTCCCCTCTCTCCCTAATTCCTAAAATATTTGGTCTCTATGTTTCATTCAT  
TCATTCATGCATGCATGCTT

>644

CACAAAGAATTCTGCCCTAAATGTTTGAATACAGAATGGTCCCCTCTCTCCCTAATTCCT  
AAAATATTTGGTCTCTATGTTTCATTCATTCATTCATGCATGCATGCTTTCAGTTAGTTCAT  
CGACAAACATTTACATCTA

>645

ATTCTGCCCTAAATGTTTGAATACAGAATGGTCCCCTCTCTCCCTAATTCCTAAAATATTT  
GGTCTCTATGTTTCATTCATTCATTCATGCATGCATGCTTTCAGTTAGTTCATCGACAAAC

ATTTACATCTACTCTGTTT

>646

CCCTCTCTCCCTAATTCCTAAAATATTTGGTCTCTATGTTCAATTCATTCATTCATGCATGC  
ATGCTTTTCA GTTAGTTCATCGACAAACATTTACATCTACTCTGTTTGACAGTGTGCTAGG  
CTCTGGGGCTTGGGAGTGG

>647

CTCTCCCTAATTCCTAAAATATTTGGTCTCTATGTTCAATTCATTCATTCATGCATGCATGC  
TTTCA GTTAGTTCATCGACAAACATTTACATCTACTCTGTTTGACAGTGTGCTAGGCTCT  
GGGGCTTGGGAGTGGAAAT

>648

CTATGTTCAATTCATTCATTCATGCATGCATGCTTTCA GTTAGTTCATCGACAAACATTTAC  
ATCTACTCTGTTTGACAGTGTGCTAGGCTCTGGGGCTTGGGAGTGGAAATACTAAATTG  
AACAAGACTGAGGCCTTGCC

>649

TTCAGTTAGTTCATCGACAAACATTTACATCTACTCTGTTTGACAGTGTGCTAGGCTCTG  
GGGCTTGGGAGTGGAAATACTAAATTGAACAAGACTGAGGCCTTGCCTTCCAGAAACT  
CACAAAGGAGTGGGTGGTCAGA

>650

CTGGGGCTTGGGAGTGGAAATACTAAATTGAACAAGACTGAGGCCTTGCCTTCCAGAA  
ACTCACAAAGGAGTGGGTGGTCAGAATGCACATGACTCAGTCAGATATAAGGCAGATG  
GTGGTAAATACTATGATAAATGTT

>651

GGCTTGGGAGTGGAAATACTAAATTGAACAAGACTGAGGCCTTGCCTTCCAGAAACTC  
ACAAAGGAGTGGGTGGTCAGAATGCACATGACTCAGTCAGATATAAGGCAGATGGTGG  
TAAATACTATGATAAATGTTTCA

>652

TTGAACAAGACTGAGGCCTTGCCTTCCAGAAACTCACAAAGGAGTGGGTGGTCAGAA  
TGCACATGACTCAGTCAGATATAAGGCAGATGGTGGTAAATACTATGATAAATGTTTCA  
ATAGTGCTAAGGGGCTTATGGAGA

>653

CTTCCAGAAACTCACAAAGGAGTGGGTGGTCAGAATGCACATGACTCAGTCAGATATA  
AGGCAGATGGTGGTAAATACTATGATAAATGTTTCAATAGTGCTAAGGGGCTTATGGAG  
AATGGGAGAAATTAAATCTGACT

>654

GGAGTGGGTGGTCAGAATGCACATGACTCAGTCAGATATAAGGCAGATGGTGGTAAAT  
ACTATGATAAATGTTTCAATAGTGCTAAGGGGCTTATGGAGAATGGGAGAAATTAAATC  
TGA CTCAAGGGTGGGTGGAGAAG

>655

GGTCAGAATGCACATGACTCAGTCAGATATAAGGCAGATGGTGGTAAATACTATGATAA  
ATGTTTCAATAGTGCTAAGGGGCTTATGGAGAATGGGAGAAATTAAATCTGACTCAAG  
GGTGGGTGGAGAAGATTACATCC

>656

TACTATGATAAATGTTTCAATAGTGCTAAGGGGCTTATGGAGAATGGGAGAAATTAAAT  
CTGACTCAAGGGTGGGTGGAGAAGATTACATCCAAGATCCAGCAATGACTTCCAGAAG

AGACAAATGAACCTGGCCTGGCA

>657

ATGATAAATGTTTCAGATAGTGCTAAGGGGCTTATGGAGAATGGGAGAAATTAAATCTGA  
CTCAAGGGTGGGTGGAGAAGATTACATCCAAGATCCAGCAATGACTTCCAGAAGAGA  
CAAATGAACCTGGCCTGGCAAGGG

>658

AGATTACATCCAAGATCCAGCAATGACTTCCAGAAGAGACAAATGAACCTGGCCTGGC  
AAGGGAGGCAGAGTCAAAGTGTCTGGCTCAAAGCCCACCACAGCCTTGGCTCACAGG  
CATCTCCCGGTCTTCCACTCACTCA

>659

CATCCAAGATCCAGCAATGACTTCCAGAAGAGACAAATGAACCTGGCCTGGCAAGGG  
AGGCAGAGTCAAAGTGTCTGGCTCAAAGCCCACCACAGCCTTGGCTCACAGGCATCT  
CCCGGTCTTCCACTCACTCAGTCCTT

>660

TGGCAAGGGAGGCAGAGTCAAAGTGTCTGGCTCAAAGCCCACCACAGCCTTGGCTCA  
CAGGCATCTCCCGGTCTTCCACTCACTCAGTCCTTTCAGGGAAAGGCACTGAGCTTTT  
CTCAAGGGAGAACTCCAAAGACGTC

>661

GTCAAAGTGTCTGGCTCAAAGCCCACCACAGCCTTGGCTCACAGGCATCTCCCGGTCT  
TCCACTCACTCAGTCCTTTCAGGGAAAGGCACTGAGCTTTTCTCAAGGGAGAACTCCA  
AAGACGTCTTTTCATTTTCATCTTAC

>662

CCGGTCTTCCACTCACTCAGTCCTTTCAGGGAAAGGCACTGAGCTTTTCTCAAGGGAG  
AACTCCAAAGACGTCTTTTCATTTTCATCTTACAAATCCACACAAATTTGCAATTCCACTC  
CACAAGATACGAGCATTGTCTT

>663

AAGACGTCTTTTCATTTTCATCTTACAAATCCACACAAATTTGCAATTCCACTCCACAAGA  
TACGAGCATTGTCTTGCTATAATTTTAATATGATTGGCATAAATTACCTGTTATCAAGTA  
AAATAGTTTCTTCTTATGGC

>664

TGCAATTCCACTCCACAAGATACGAGCATTGTCTTGCTATAATTTTAATATGATTGGCAT  
AAATTACCTGTTATCAAGTAAAATAGTTTCTTCTTATGGCTTGTGTGCCCCTGACATACC  
ACTGCTATTTGAAAAGAGG

>665

CACTCCACAAGATACGAGCATTGTCTTGCTATAATTTTAATATGATTGGCATAAATTACC  
TGTTATCAAGTAAAATAGTTTCTTCTTATGGCTTGTGTGCCCCTGACATACCACTGCTAT  
TTGAAAAGAGGCTTCTCCA

>666

CTTGCTATAATTTTAATATGATTGGCATAAATTACCTGTTATCAAGTAAAATAGTTTCTTC  
TTATGGCTTGTGTGCCCCTGACATACCACTGCTATTTGAAAAGAGGCTTCTCCAGAAAC  
TCAGTGTCTGAGAGTACGTG

>667

GTTTCTTCTTATGGCTTGTGTGCCCCTGACATACCACTGCTATTTGAAAAGAGGCTTCTC  
CAGAAACTCAGTGTCTGAGAGTACGTGACTGGAAGGTGAGTGTTTGCTTACCCCTTGC

GTTTTCTCCCTGTCAGGATAAA

>668

TTCTTCTTATGGCTTGTGTGCCCCTGACATAACCACTGCTATTTGAAAAGAGGCTTCTCCA  
GAAACTCAGTGTCTGAGAGTACGTGACTGGAAGGTGAGTGTTTGCTTACCCCTTGCGT  
TTTCTCCCTGTCAGGATAAATG

>669

CTTGTGTGCCCCTGACATAACCACTGCTATTTGAAAAGAGGCTTCTCCAGAACTCAGT  
GTCTGAGAGTACGTGACTGGAAGGTGAGTGTTTGCTTACCCCTTGCGTTTTCTCCCTGT  
CAGGATAAATGGAATATTCTGCT

>670

CTGACATAACCACTGCTATTTGAAAAGAGGCTTCTCCAGAACTCAGTGTCTGAGAGTA  
CGTGACTGGAAGGTGAGTGTTTGCTTACCCCTTGCGTTTTCTCCCTGTCAGGATAAATG  
GAATATTCTGCTTTAAGGACCCT

>671

CATACCACTGCTATTTGAAAAGAGGCTTCTCCAGAACTCAGTGTCTGAGAGTACGTG  
ACTGGAAGGTGAGTGTTTGCTTACCCCTTGCGTTTTCTCCCTGTCAGGATAAATGGAAT  
ATTCTGCTTTAAGGACCCTAAGT

>672

AAGAGGCTTCTCCAGAACTCAGTGTCTGAGAGTACGTGACTGGAAGGTGAGTGTTT  
GCTTACCCCTTGCGTTTTCTCCCTGTCAGGATAAATGGAATATTCTGCTTTAAGGACCCT  
AAGTCTGGCAATATCATGTTTTG

>673

GAGTGTTTGCTTACCCCTTGCGTTTTCTCCCTGTCAGGATAAATGGAATATTCTGCTTTA  
AGGACCCTAAGTCTGGCAATATCATGTTTTGTGAACAGCCAACACAGTAACTATGGTTG  
AGGCCTGTATTCGATGAATGA

>674

CCTTGCGTTTTCTCCCTGTCAGGATAAATGGAATATTCTGCTTTAAGGACCCTAAGTCTG  
GCAATATCATGTTTTGTGAACAGCCAACACAGTAACTATGGTTGAGGCCTGTATTCGAT  
GAATGAGGTTTTCATATGCTT

>675

GGATAAATGGAATATTCTGCTTTAAGGACCCTAAGTCTGGCAATATCATGTTTTGTGAAC  
AGCCAACACAGTAACTATGGTTGAGGCCTGTATTCGATGAATGAGGTTTTCATATGCTT  
CTTTCACATCAGGAGAGAGAG

>676

GAATATTCTGCTTTAAGGACCCTAAGTCTGGCAATATCATGTTTTGTGAACAGCCAACA  
CAGTAACTATGGTTGAGGCCTGTATTCGATGAATGAGGTTTTCATATGCTTCTTTCACAT  
CAGGAGAGAGAGAGAGAAAAA

>677

CTTTAAGGACCCTAAGTCTGGCAATATCATGTTTTGTGAACAGCCAACACAGTAACTAT  
GGTTGAGGCCTGTATTCGATGAATGAGGTTTTCATATGCTTCTTTCACATCAGGAGAGA  
GAGAGAGAAAAAAAATAATAA

>678

TCTGGCAATATCATGTTTTGTGAACAGCCAACACAGTAACTATGGTTGAGGCCTGTATT  
CGATGAATGAGGTTTTCATATGCTTCTTTCACATCAGGAGAGAGAGAGAGAGAAAAAAA

>679

>680

>681

>682

>683

>684

>685

>686

>687

>688

>689

GCTATTAAACAGCATAAGAAACTGTTACCTATCCCCTCTTCCTGGCCCCCAACAAAGA  
AACAGCAAACCTGTTAAAAAAGCCCATGTCTCCCCATGAGGACTTGGGGGTAAATTTTCA

GCATGGTGTCTGGGGATTCATCT

>690

AAGAAACTGTTACCTATCCCCTCTTCTGGCCCCCAACAAAGAAACAGCAAACCTGTT  
AAAAAAGCCCATGTCTCCCCATGAGGACTTGGGGTTAATTTTCAGCATGGTGTCTGGG  
GATTCATCTGTGGGACTCCTATTA

>691

ACAAAGAAACAGCAAACCTGTTAAAAAAGCCCATGTCTCCCCATGAGGACTTGGGGTT  
AATTTTCAGCATGGTGTCTGGGGATTCATCTGTGGGACTCCTATTACCCATAATAGGACT  
CATGCTGCTTCATTTTCATGCACA

>692

AAAGAAACAGCAAACCTGTTAAAAAAGCCCATGTCTCCCCATGAGGACTTGGGGTTAAT  
TTTCAGCATGGTGTCTGGGGATTCATCTGTGGGACTCCTATTACCCATAATAGGACTCAT  
GCTGCTTCATTTTCATGCACACG

>693

GTAAAAAAGCCCATGTCTCCCCATGAGGACTTGGGGTTAATTTTCAGCATGGTGTCTG  
GGGATTCATCTGTGGGACTCCTATTACCCATAATAGGACTCATGCTGCTTCATTTTCATGC  
ACACGATATGGAAAATGCACC

>694

CCTATTACCCATAATAGGACTCATGCTGCTTCATTTTCATGCACACGATATGGAAAATGCA  
CCCTTCCCTAGTGATGAAATTTTAGTTTTGAAATTGAGGCTAGCTTTTGCAGAACAAAG  
CAGATTCCCAGAAACACCAA

>695

TAGGACTCATGCTGCTTCATTTTCATGCACACGATATGGAAAATGCACCCTTCCCTAGTGA  
TGAAATTTTAGTTTTGAAATTGAGGCTAGCTTTTGCAGAACAAAGCAGATTCCCAGAA  
ACACCAAAAACCTATTCAATGTT

>696

TTAGTTTTGAAATTGAGGCTAGCTTTTGCAGAACAAAGCAGATTCCCAGAAACACCAA  
AACTATTCAATGTTGGCCTAGAGCCTGTGTGTCCGTGCTTAGGTGAGTATGTGTATCT  
GAAAGGGAGAAAATGCCTTCCTC

>697

AGGCTAGCTTTTGCAGAACAAAGCAGATTCCCAGAAACACCAAAAACCTATTCAATGTT  
GGCCTAGAGCCTGTGTGTCCGTGCTTAGGTGAGTATGTGTATCTGAAAGGGAGAAAAT  
GCCTTCCTCTAAGTGCGTATGCCC

>698

AACAAAGCAGATTCCCAGAAACACCAAAAACCTATTCAATGTTGGCCTAGAGCCTGTGT  
GTCCGTGCTTAGGTGAGTATGTGTATCTGAAAGGGAGAAAATGCCTTCCTCTAAGTGCG  
TATGCCCCTCTCAAAGACAATAT

>699

GGCCTAGAGCCTGTGTGTCCGTGCTTAGGTGAGTATGTGTATCTGAAAGGGAGAAAAT  
GCCTTCCTCTAAGTGCGTATGCCCCTCTCAAAGACAATATTCAAATATCATGCCCCGATAG  
CTGACAGCGGTCAATGGTTGCT

>700

TAGAGCCTGTGTGTCCGTGCTTAGGTGAGTATGTGTATCTGAAAGGGAGAAAATGCCTT  
CCTCTAAGTGCGTATGCCCCTCTCAAAGACAATATTCAAATATCATGCCCCGATAGCTGAC

AGCGGTCAATGGTTGCTATGC

>701

TGCCTTCCTCTAAGTGCGTATGCCCCCTCTCAAAGACAATATTCAAATATCATGCCCCGATA  
GCTGACAGCGGTCAATGGTTGCTATGCTTCATCCCAAAGCTTTGTTAGGAACCCCATAA  
AACCTGGCACATGGTTTGTGA

>702

CTCTAAGTGCGTATGCCCCCTCTCAAAGACAATATTCAAATATCATGCCCCGATAGCTGACA  
GCGGTCAATGGTTGCTATGCTTCATCCCAAAGCTTTGTTAGGAACCCCATAAAAACCTGG  
CACATGGTTTGTGACACCCAG

>703

GACAATATTCAAATATCATGCCCCGATAGCTGACAGCGGTCAATGGTTGCTATGCTTCATC  
CCAAAGCTTTGTTAGGAACCCCATAAAAACCTGGCACATGGTTTGTGACACCCAGTGAA  
ACACCGTGCTTCTTCCATAATA

>704

TGACAGCGGTCAATGGTTGCTATGCTTCATCCCAAAGCTTTGTTAGGAACCCCATAAAA  
CCTGGCACATGGTTTGTGACACCCAGTGAAACACCGTGCTTCTTCCATAATATCCTGAG  
CCCTGCTGCCTGTCATTAAGGG

>705

AGCGGTCAATGGTTGCTATGCTTCATCCCAAAGCTTTGTTAGGAACCCCATAAAAACCTG  
GCACATGGTTTGTGACACCCAGTGAAACACCGTGCTTCTTCCATAATATCCTGAGCCCT  
GCTGCCTGTCATTAAGGGACCT

>706

CCTGGCACATGGTTTGTGACACCCAGTGAAACACCGTGCTTCTTCCATAATATCCTGAG  
CCCTGCTGCCTGTCATTAAGGGACCTCTCTTATTAAGCATCTCTTTTTTAAATGGCTGCC  
ATCATCTGGTCCCAGTGTACA

>707

AGCCCTGCTGCCTGTCATTAAGGGACCTCTCTTATTAAGCATCTCTTTTTTAAATGGCTG  
CCATCATCTGGTCCCAGTGTACATTAAATCCCATTATAATTATAAACACACTTCCCCATAA  
CATTCGTTGCAGATCTCAC

>708

GCTGCCTGTCATTAAGGGACCTCTCTTATTAAGCATCTCTTTTTTAAATGGCTGCCATCA  
TCTGGTCCCAGTGTACATTAAATCCCATTATAATTATAAACACACTTCCCCATAACATTCG  
TTGCAGATCTCACCCTCAG

>709

GCTGCCATCATCTGGTCCCAGTGTACATTAAATCCCATTATAATTATAAACACACTTCCC  
CATAACATTCGTTGCAGATCTCACCCTCAGTGCCTACCCCTTAGGGCATCTTTGCACTA  
ATAACAACCTCAGATTGCTA

>710

AGTGTACATTAAATCCCATTATAATTATAAACACACTTCCCCATAACATTCGTTGCAGATC  
TCACCCCTCAGTGCCTACCCCTTAGGGCATCTTTGCACTAATAACAACCTCAGATTGCTA  
TCTGAGTTGACAACATTAG

>711

AGATCTCACCCCTCAGTGCCTACCCCTTAGGGCATCTTTGCACTAATAACAACCTCAGAT  
TTGCTATCTGAGTTGACAACATTAGGTCCCAACACCATTGCAATATGCTGGGGAAAGA

GACAGAGAGAGAAGAAAAAGCT

>712

GTGCCTACCCCCTTAGGGCATCTTTGCACTAATAACAACTCAGATTTGCTATCTGAGTTG  
ACAACATTAGGTCCCAACACCATTTGCAATATGCTGGGGAAAGAGACAGAGAGAGAA  
GAAAAAGCTTTTTCTTCCTTAAT

>713

GCAATATGCTGGGGAAAGAGACAGAGAGAGAAGAAAAAGCTTTTTCTTCCTTAATCAC  
GAAGATCTTGGGGTCACAGTGACCCAAGGCCTCAGGAGCTAAAAAAAAAAAAATCCCT  
CCTCCTACCCTTTTGAAAAGTCACT

>714

TGCTGGGGAAAGAGACAGAGAGAGAAGAAAAAGCTTTTTCTTCCTTAATCACGAAGA  
TCTTGGGGTCACAGTGACCCAAGGCCTCAGGAGCTAAAAAAAAAAAAATCCCTCCTCCT  
ACCCTTTTGAAAAGTCACTCTCTAC

>715

CTTGGGGTCACAGTGACCCAAGGCCTCAGGAGCTAAAAAAAAAAAAATCCCTCCTCCT  
ACCCTTTTGAAAAGTCACTCTCTACTCTACAGATGAGGGAAGGGCATACTTGGCACCT  
GGGAGAGAAACTCAAGTTTGTAAC

>716

CTTTTGAAAAGTCACTCTCTACTCTACAGATGAGGGAAGGGCATACTTGGCACCTGGG  
AGAGAAACTCAAGTTTGTAACACCACTAACCAGGTCTCTGTTGGTTGGGGCGGTGAT  
GGTGGTGGTAGTGGTGGGGTGGGG

>717

TGAAAAGTCACTCTCTACTCTACAGATGAGGGAAGGGCATACTTGGCACCTGGGAGAG  
AAACTCAAGTTTGTAACACCACTAACCAGGTCTCTGTTGGTTGGGGCGGTGATGGTG  
GTGGTAGTGGTGGGGTGGGGGATG

>718

TCTACAGATGAGGGAAGGGCATACTTGGCACCTGGGAGAGAAACTCAAGTTTGTAAC  
ACCACTAACCAGGTCTCTGTTGGTTGGGGCGGTGATGGTGGTGGTAGTGGTGGGGTGG  
GGGATGAGGGATGATGGCAATCAC

>719

CACCTGGGAGAGAAACTCAAGTTTGTAACACCACTAACCAGGTCTCTGTTGGTTGGG  
GCGGTGATGGTGGTGGTAGTGGTGGGGTGGGGGATGAGGGATGATGGCAATCACTAAT  
CAAAGAAGCTGTCTTATTTGGTTT

>720

CTGGGAGAGAAACTCAAGTTTGTAACACCACTAACCAGGTCTCTGTTGGTTGGGGCG  
GTGATGGTGGTGGTAGTGGTGGGGTGGGGGATGAGGGATGATGGCAATCACTAATCAA  
AGAAGCTGTCTTATTTGGTTTGCT

>721

GAGAAACTCAAGTTTGTAACACCACTAACCAGGTCTCTGTTGGTTGGGGCGGTGATG  
GTGGTGGTAGTGGTGGGGTGGGGGATGAGGGATGATGGCAATCACTAATCAAAGAAG  
CTGTCTTATTTGGTTTGCTGAGCCT

>722

GGGCGGTGATGGTGGTGGTAGTGGTGGGGTGGGGGATGAGGGATGATGGCAATCACTA  
ATCAAAGAAGCTGTCTTATTTGGTTTGCTGAGCCTCAACTAACCGGAATGCATACATCA



CCTGATTCTTTCCCCCTCTGCTT

>723

GGTGGTGGTAGTGGTGGGGTGGGGGATGAGGGATGATGGCAATCACTAATCAAAGAA  
GCTGTCTTATTTGGTTTGCTGAGCCTCAACTAACCGGAATGCATACATCACCTGATTCTT  
TCCCCCTCTGCTTTTTTGGAGGGG

>724

TAACCGGAATGCATACATCACCTGATTCTTTCCCCCTCTGCTTTTTTGGAGGGGGGCATCTA  
AGGACATAATGTAAAAGAATTAAAATTTAAAAACAAAAACAAAATGTCAACATATGCA  
GGAGTAAATTCCACTCTGCCTA

>725

CTCTGCTTTTTTGGAGGGGGGCATCTAAGGACATAATGTAAAAGAATTAAAATTTAAAAAC  
AAAAACAAAATGTCAACATATGCAGGAGTAAATTCCACTCTGCCTAATTTTTTTTTTTTTT  
TTGAAATGAGATCTTGTTCTG

>726

GGGCATCTAAGGACATAATGTAAAAGAATTAAAATTTAAAAACAAAAACAAAATGTCA  
ACATATGCAGGAGTAAATTCCACTCTGCCTAATTTTTTTTTTTTTTTGAAATGAGATCTT  
GTTCTGTCACCCAGGCTGGAGG

>727

CAAAATGTCAACATATGCAGGAGTAAATTCCACTCTGCCTAATTTTTTTTTTTTTTTGAA  
ATGAGATCTTGTTCTGTCACCCAGGCTGGAGGGCAGTGGTGCAATCTCAGCTCACTGC  
AGCCACCACCTCCCAGGTTCAA

>728

TGTCAACATATGCAGGAGTAAATTCCACTCTGCCTAATTTTTTTTTTTTTTTGAAATGAG  
ATCTTGTTCTGTCACCCAGGCTGGAGGGCAGTGGTGCAATCTCAGCTCACTGCAGCCA  
CCACCTCCCAGGTTCAAGCGAT

>729

AATTCCACTCTGCCTAATTTTTTTTTTTTTTTGAAATGAGATCTTGTTCTGTCACCCAGG  
CTGGAGGGCAGTGGTGCAATCTCAGCTCACTGCAGCCACCACCTCCCAGGTTCAAGC  
GATTCTCCCGCCTCAGCCCCCTA

>730

GATCTTGTTCTGTCACCCAGGCTGGAGGGCAGTGGTGCAATCTCAGCTCACTGCAGCC  
ACCACCTCCCAGGTTCAAGCGATTCTCCCGCCTCAGCCCCCTAAGTAGCTGGTATTACA  
GGCACGTGCCACCACGCCTGGCT

>731

TGGTGCAATCTCAGCTCACTGCAGCCACCACCTCCCAGGTTCAAGCGATTCTCCCGCC  
TCAGCCCCCTAAGTAGCTGGTATTACAGGCACGTGCCACCACGCCTGGCTAATTTTTGT  
ATTTTATAGTAGAGATAGGGTTTC

>732

GCAGCCACCACCTCCCAGGTTCAAGCGATTCTCCCGCCTCAGCCCCCTAAGTAGCTGG  
TATTACAGGCACGTGCCACCACGCCTGGCTAATTTTTGTATTTTATAGTAGAGATAGGGTT  
TCACCATGTTGGCCAGGCTGGT

>733

CGATTCTCCCGCCTCAGCCCCCTAAGTAGCTGGTATTACAGGCACGTGCCACCACGCCT  
GGCTAATTTTTGTATTTTATAGTAGAGATAGGGTTTCACCATGTTGGCCAGGCTGGTCTCA

AACTCCTGACCTCAAGTGATC

>734

CCTAAGTAGCTGGTATTACAGGCACGTGCCACCACGCCTGGCTAATTTTTGTATTTTAG  
TAGAGATAGGGTTTCACCATGTTGGCCAGGCTGGTCTCAAACCTCCTGACCTCAAGTGA  
TCCGCCTGCCTCGGCCTCCTAA

>735

TGGTATTACAGGCACGTGCCACCACGCCTGGCTAATTTTTGTATTTTAGTAGAGATAGG  
GTTTCACCATGTTGGCCAGGCTGGTCTCAAACCTCCTGACCTCAAGTGATCCGCCTGCCT  
CGGCCTCCTAAAGTGCTGGGA

>736

ACGTGCCACCACGCCTGGCTAATTTTTGTATTTTAGTAGAGATAGGGTTTCACCATGTT  
GGCCAGGCTGGTCTCAAACCTCCTGACCTCAAGTGATCCGCCTGCCTCGGCCTCCTAAA  
GTGCTGGGAGTACAGGCATGAG

>737

ATTTTTGTATTTTAGTAGAGATAGGGTTTCACCATGTTGGCCAGGCTGGTCTCAAACCTC  
CTGACCTCAAGTGATCCGCCTGCCTCGGCCTCCTAAAGTGCTGGGAGTACAGGCATGA  
GCCACTGCGCCAGCCTACTCT

>738

TTTCACCATGTTGGCCAGGCTGGTCTCAAACCTCCTGACCTCAAGTGATCCGCCTGCCTC  
GGCCTCCTAAAGTGCTGGGAGTACAGGCATGAGCCACTGCGCCAGCCTACTCTGCCC  
AATTGTTGACATCACCTACAGCT

>739

GTTGGCCAGGCTGGTCTCAAACCTCCTGACCTCAAGTGATCCGCCTGCCTCGGCCTCCT  
AAAGTGCTGGGAGTACAGGCATGAGCCACTGCGCCAGCCTACTCTGCCCAATTGTTG  
ACATCACCTACAGCTCTATAGTAG

>740

CCTGCCTCGGCCTCCTAAAGTGCTGGGAGTACAGGCATGAGCCACTGCGCCAGCCTA  
CTCTGCCCAATTGTTGACATCACCTACAGCTCTATAGTAGATGTCTGGAATGATGATCTG  
AAGGACTGTAAGACTGTAAGAT

>741

GGGAGTACAGGCATGAGCCACTGCGCCAGCCTACTCTGCCCAATTGTTGACATCACC  
TACAGCTCTATAGTAGATGTCTGGAATGATGATCTGAAGGACTGTAAGACTGTAAGATT  
TTTTGACTCCAGAAATGGACACA

>742

ACAGGCATGAGCCACTGCGCCAGCCTACTCTGCCCAATTGTTGACATCACCTACAGC  
TCTATAGTAGATGTCTGGAATGATGATCTGAAGGACTGTAAGACTGTAAGATTTTTTGA  
CTCCAGAAATGGACACAATAGGC

>743

CTACTCTGCCCAATTGTTGACATCACCTACAGCTCTATAGTAGATGTCTGGAATGATGAT  
CTGAAGGACTGTAAGACTGTAAGATTTTTTGA

>744

CCCAATTGTTGACATCACCTACAGCTCTATAGTAGATGTCTGGAATGATGATCTGAAGG  
ACTGTAAGACTGTAAGATTTTTTGA

TCCCCTAACAGTCCCTGGCAGG

>745

GAATGATGATCTGAAGGACTGTAAGACTGTAAGATTTTTTGGACTCCAGAAATGGACAC  
AATAGGCTTGCGGTGTCTTCCCCTAACAGTCCCTGGCAGGGTAAAGGTCTGATGCCCT  
GGTACGTTCCCCAGTGGCAATCTG

>746

ATGATGATCTGAAGGACTGTAAGACTGTAAGATTTTTTGGACTCCAGAAATGGACACAAT  
AGGCTTGCGGTGTCTTCCCCTAACAGTCCCTGGCAGGGTAAAGGTCTGATGCCCTGGT  
ACGTTCCCCAGTGGCAATCTGGA

>747

GTAAGATTTTTTGGACTCCAGAAATGGACACAATAGGCTTGCGGTGTCTTCCCCTAACAG  
TCCCTGGCAGGGTAAAGGTCTGATGCCCTGGTACGTTCCCCAGTGGCAATCTGGAGTT  
CTCAACTGCAGAGAATACTTTTC

>748

TTTTTTGGACTCCAGAAATGGACACAATAGGCTTGCGGTGTCTTCCCCTAACAGTCCCTG  
GCAGGGTAAAGGTCTGATGCCCTGGTACGTTCCCCAGTGGCAATCTGGAGTTCTCAAC  
TGCAGAGAATACTTTTCCTCTAC

>749

GAAATGGACACAATAGGCTTGCGGTGTCTTCCCCTAACAGTCCCTGGCAGGGTAAAGG  
TCTGATGCCCTGGTACGTTCCCCAGTGGCAATCTGGAGTTCTCAACTGCAGAGAATACT  
TTTCCTCTACTCAGGGGCGTCAC

>750

CCCTGGTACGTTCCCCAGTGGCAATCTGGAGTTCTCAACTGCAGAGAATACTTTTCCTC  
TACTCAGGGGCGTCACTACCTGCATCTCTCCCTGAACATGCTTCATTTTCCACTCATCAC  
AAGTTTTTTGGGGAAATGCAAA

>751

TTTTCCTCTACTCAGGGGCGTCACTACCTGCATCTCTCCCTGAACATGCTTCATTTTCCA  
CTCATCACAAGTTTTTTGGGGAAATGCAAAGTGGCATCTTCTCCCCAAAAGGTAGGGAT  
CTTTGATTTTTTTAATCACGAT

>752

GTCACCTGCATCTCTCCCTGAACATGCTTCATTTTCCACTCATCACAAGTTTTTTGGG  
GAAATGCAAAGTGGCATCTTCTCCCCAAAAGGTAGGGATCTTTGATTTTTTTAATCACG  
ATAGAAAAGTTTACTTTGAAA

>753

TGAACATGCTTCATTTTCCACTCATCACAAGTTTTTTGGGGAAATGCAAAGTGGCATCTT  
CTCCCCAAAAGGTAGGGATCTTTGATTTTTTTAATCACGATAGAAAAGTTTACTTTGAA  
ATAAAAAAATTAAATATATGTT

>754

GGGGAAATGCAAAGTGGCATCTTCTCCCCAAAAGGTAGGGATCTTTGATTTTTTTAATC  
ACGATAGAAAAGTTTACTTTGAAATAAAAAAATTAAATATATGTTCCAAATTAAGAGTT  
GGAACTTAAAGAGTTGCAACAT

>755

AAGGTAGGGATCTTTGATTTTTTTAATCACGATAGAAAAGTTTACTTTGAAATAAAAAA  
ATTAAATATATGTTCCAAATTAAGAGTTGGAACCTTAAAGAGTTGCAACATTCCATTCTATA

CTCAGATACTCAAAACACCAC

>756

TGATTTTTTTAATCACGATAGAAAAGTTTACTTTGAAATAAAAAAATTAAATATATGTTCCAAATTAAGAGTTGGAACCTAAAGAGTTGCAACATTCCATTCATACTCAGATACTCAAAACACCACTGTATTCTTCTTCC

>757

CGATAGAAAAGTTTACTTTGAAATAAAAAAATTAAATATATGTTCCAAATTAAGAGTTGGAACCTAAAGAGTTGCAACATTCCATTCATACTCAGATACTCAAAACACCACTGTATTCTTCTCCTATCTCTTTAGTTGA

>758

TTCCAAATTAAGAGTTGGAACCTAAAGAGTTGCAACATTCCATTCATACTCAGATACTCAAAACACCACTGTATTCTTCTCCTATCTCTTTAGTTGAAGTTTTTTTTTGTAATTCAAAAGCCCCCTCCCAATTTCTGCC

>759

AAAGAGTTGCAACATTCCATTCATACTCAGATACTCAAAACACCACTGTATTCTTCTCTATCTCTTTAGTTGAAGTTTTTTTTTGTAATTCAAAGCCCCCTCCCAATTTCTGCCTGAGATTCTGAGGGAGGAGGAAA

>760

CCATTCATACTCAGATACTCAAAACACCACTGTATTCTTCTCCTATCTCTTTAGTTGAAGTTTTTTTTTGTAATTCAAAGCCCCCTCCCAATTTCTGCCTGAGATTCTGAGGGAGGAGGAAAAGTGTAAGATCCTGGG

>761

TTGAAGTTTTTTTTTGTAATTCAAAGCCCCCTCCCAATTTCTGCCTGAGATTCTGAGGGAGGAGGAAAAGTGTAAGATCCTGGGGGATCTAAGTCTCTTTACCTGGTGACCAAGCTGAGAACCATTGGTCCTCAGCTT

>762

AAGCCCCCTCCCAATTTCTGCCTGAGATTCTGAGGGAGGAGGAAAAGTGTAAGATCCTGGGGGATCTAAGTCTCTTTACCTGGTGACCAAGCTGAGAACCATTGGTCCTCAGCTTGGCTGGCTGCTGCACAGATCTTG

>763

AATTTCTGCCTGAGATTCTGAGGGAGGAGGAAAAGTGTAAGATCCTGGGGGATCTAAGTCTCTTTACCTGGTGACCAAGCTGAGAACCATTGGTCCTCAGCTTGGCTGGCTGCTGCACAGATCTTGGCCTCAGCAGAGT

>764

GAGGAGGAAAAGTGTAAGATCCTGGGGGATCTAAGTCTCTTTACCTGGTGACCAAGCTGAGAACCATTGGTCCTCAGCTTGGCTGGCTGCTGCACAGATCTTGGCCTCAGCAGAGTAAGAGAAGAAGGAAAATTAAAAG

>765

TGGTGACCAAGCTGAGAACCATTGGTCCTCAGCTTGGCTGGCTGCTGCACAGATCTTGGCCTCAGCAGAGTAAGAGAAGAAGGAAAATTAAAAGCCCTTGCTTCCTTCATCTATTCTACTAGAGGCTACATAATCTAGA

>766

TAAGAGAAGAAGGAAAATTAAAAGCCCTTGCTTCCTTCATCTATTTCACTAGAGGCTACATAATCTAGAAGTTAAGAGCATGAGCTTTGCAGTCAGAATGGTCTGATTTAAAGTTTCA

GCTCTGATGTTTAATAGATCTA

>767

AAGCCCTTGCTTCCTTCATCTATTTCACTAGAGGCTACATAATCTAGAAGTTAAGAGCAT  
GAGCTTTGCAGTCAGAATGGTCTGATTTAAAGTTTCAGCTCTGATGTTTAATAGATCTAC  
AGTCTGCAGTAAGGCACTTA

>768

CTTCCTTCATCTATTTCACTAGAGGCTACATAATCTAGAAGTTAAGAGCATGAGCTTTGC  
AGTCAGAATGGTCTGATTTAAAGTTTCAGCTCTGATGTTTAATAGATCTACAGTCTGCA  
GTAAGGCACTTAATCTCTCTG

>769

TACATAATCTAGAAGTTAAGAGCATGAGCTTTGCAGTCAGAATGGTCTGATTTAAAGTT  
TCAGCTCTGATGTTTAATAGATCTACAGTCTGCAGTAAGGCACTTAATCTCTCTGAACCT  
CAGTTTTCATGTCCACAGAAA

>770

TAAGAGCATGAGCTTTGCAGTCAGAATGGTCTGATTTAAAGTTTCAGCTCTGATGTTTA  
ATAGATCTACAGTCTGCAGTAAGGCACTTAATCTCTCTGAACCTCAGTTTTTCATGTCCA  
CAGAAATTGGGAAAATAATAGC

>771

ATGAGCTTTGCAGTCAGAATGGTCTGATTTAAAGTTTCAGCTCTGATGTTTAATAGATCT  
ACAGTCTGCAGTAAGGCACTTAATCTCTCTGAACCTCAGTTTTTCATGTCCACAGAAATT  
GGGAAAATAATAGCACCTGCA

>772

TTAAAGTTTCAGCTCTGATGTTTAATAGATCTACAGTCTGCAGTAAGGCACTTAATCTCT  
CTGAACCTCAGTTTTTCATGTCCACAGAAATTGGGAAAATAATAGCACCTGCATTAATAG  
GATTGTTATGTGGATTAAATA

>773

AATCTCTCTGAACCTCAGTTTTTCATGTCCACAGAAATTGGGAAAATAATAGCACCTGCA  
TTAATAGGATTGTTATGTGGATTAAATAAAACAACATAGGTAATGTGTTGAGTTTCGTAG  
TCAGTGCTCAGAATGAGTTAT

>774

CTCTGAACCTCAGTTTTTCATGTCCACAGAAATTGGGAAAATAATAGCACCTGCATTAAT  
AGGATTGTTATGTGGATTAAATAAAACAACATAGGTAATGTGTTGAGTTTCGTAGTCAG  
TGCTCAGAATGAGTTATTATTT

>775

CACAGAAATTGGGAAAATAATAGCACCTGCATTAATAGGATTGTTATGTGGATTAAATAA  
AACAAACATAGGTAATGTGTTGAGTTTCGTAGTCAGTGCTCAGAATGAGTTATTATTTTCG  
CTGTCTCCTTCCTGTATGAT

>776

AAATTGGGAAAATAATAGCACCTGCATTAATAGGATTGTTATGTGGATTAAATAAAACA  
ACATAGGTAATGTGTTGAGTTTCGTAGTCAGTGCTCAGAATGAGTTATTATTTTCGCTGT  
CTCCTTCCTGTATGATCTCTT

>777

ATTGGGAAAATAATAGCACCTGCATTAATAGGATTGTTATGTGGATTAAATAAAACAACA  
TAGGTAATGTGTTGAGTTTCGTAGTCAGTGCTCAGAATGAGTTATTATTTTCGCTGTCTC

CTTCCTGTATGATCTCTTAG

>778

TAATAGCACCTGCATTAATAGGATTGTTATGTGGATTAAATAAAACAACATAGGTAATGT  
GTTGAGTTTCGTAGTCAGTGCTCAGAATGAGTTATTATTTTCGCTGTCTCCTTCCTGTAT  
GATCTCTTAGAACTGCTATA

>779

GGATTGTTATGTGGATTAAATAAAACAACATAGGTAATGTGTTGAGTTTCGTAGTCAGT  
GCTCAGAATGAGTTATTATTTTCGCTGTCTCCTTCCTGTATGATCTCTTAGAACTGCTATA  
CCCTCCTGTTCCACTAACTG

>780

AACATAGGTAATGTGTTGAGTTTCGTAGTCAGTGCTCAGAATGAGTTATTATTTTCGCTG  
TCTCCTTCCTGTATGATCTCTTAGAACTGCTATAACCCTCCTGTTCCACTAACTGAGCTCT  
GAAAGGCTGCCAGTGGTGGG

>781

GTGCTCAGAATGAGTTATTATTTTCGCTGTCTCCTTCCTGTATGATCTCTTAGAACTGCTA  
TACCCTCCTGTTCCACTAACTGAGCTCTGAAAGGCTGCCAGTGGTGGGAGGTACATGG  
GTAAAGAGGGAGATGAGGGAG

>782

TCCTTCCTGTATGATCTCTTAGAACTGCTATAACCCTCCTGTTCCACTAACTGAGCTCTGA  
AAGGCTGCCAGTGGTGGGAGGTACATGGGTAAAGAGGGAGATGAGGGAGTAAGATTT  
AGCAATGGAATTCCATGCAAAGG

>783

TTCCTGTATGATCTCTTAGAACTGCTATAACCCTCCTGTTCCACTAACTGAGCTCTGAAAG  
GCTGCCAGTGGTGGGAGGTACATGGGTAAAGAGGGAGATGAGGGAGTAAGATTTAGC  
AATGGAATTCCATGCAAAGGCCA

>784

ATGATCTCTTAGAACTGCTATAACCCTCCTGTTCCACTAACTGAGCTCTGAAAGGCTGCC  
AGTGGTGGGAGGTACATGGGTAAAGAGGGAGATGAGGGAGTAAGATTTAGCAATGGA  
ATTCCATGCAAAGGCCAGCTCATC

>785

TGTTCCACTAACTGAGCTCTGAAAGGCTGCCAGTGGTGGGAGGTACATGGGTAAAGAG  
GGAGATGAGGGAGTAAGATTTAGCAATGGAATTCCATGCAAAGGCCAGCTCATCTATTC  
CTCTGTCTCTAGCATGATCTCCC

>786

TAAAGAGGGAGATGAGGGAGTAAGATTTAGCAATGGAATTCCATGCAAAGGCCAGCTC  
ATCTATTCCTCTGTCTCTAGCATGATCTCCCCCTAAGATTGAGATCTCCTGTATTTTGA  
ACTGATACCCAGGTTTCCCTT

>787

TTCCATGCAAAGGCCAGCTCATCTATTCCTCTGTCTCTAGCATGATCTCCCCCTAAGATT  
GAGATCTCCTGTATTTTGAAGCTGATACCCAGGTTTCCCTTAAAGACGCTTCAAGAA  
AAAATGTAAAAGAAAAATCAC

>788

TATTCCTCTGTCTCTAGCATGATCTCCCCCTAAGATTGAGATCTCCTGTATTTTGAAGCT  
GATACCCAGGTTTCCCTTAAAGACGCTTCAAGAAAAAATGTAAAAGAAAAATCACTC

TAAATACACGAACATGAGAGA

>789

AAGATTGAGATCTCCTGTATTTTTAGAACTGATACCCAGGTTTCCCTTAAAAGACGCTT  
CAAGAAAAAATGTAAAAGAAAAATCACTCTAAATACACGAACATGAGAGAGACAGAA  
AGAGAGCGGGCATGTGCGCGCGAG

>790

CAAGAAAAAATGTAAAAGAAAAATCACTCTAAATACACGAACATGAGAGAGACAGAA  
AGAGAGCGGGCATGTGCGCGCGAGAGAGATTGAGTATTCTCTTGTAATTTCCATCCTG  
CTTGTTTTTAGGTGCTGCCATATG

>791

AAATCACTCTAAATACACGAACATGAGAGAGACAGAAAGAGAGCGGGCATGTGCGCG  
CGAGAGAGATTGAGTATTCTCTTGTAATTTCCATCCTGCTTGTTTTTAGGTGCTGCCAT  
ATGAAATCTCTGAACTGAGGAGT

>792

AAATACACGAACATGAGAGAGACAGAAAGAGAGCGGGCATGTGCGCGCGAGAGAGA  
TTGAGTATTCTCTTGTAATTTCCATCCTGCTTGTTTTTAGGTGCTGCCATATGAAATCTC  
TGAATGAGGAGTCTCATCAGCC

>793

AGAGAGCGGGCATGTGCGCGCGAGAGAGATTGAGTATTCTCTTGTAATTTCCATCCTG  
CTTGTTTTTAGGTGCTGCCATATGAAATCTCTGAACTGAGGAGTCTCATCAGCCTTCCC  
AGGACCCAAGGACATAGCTCTG

>794

GAGTATTCTCTTGTAATTTCCATCCTGCTTGTTTTTAGGTGCTGCCATATGAAATCTCTG  
AACTGAGGAGTCTCATCAGCCTTCCCAGGACCCAAGGACATAGCTCTGGCTATAAATG  
GTGCCAGTTTTGGTGGGGGAG

>795

ATGAAATCTCTGAACTGAGGAGTCTCATCAGCCTTCCCAGGACCCAAGGACATAGCTC  
TGGCTATAAATGGTGCCAGTTTTGGTGGGGGAGCTGCTGCTGCTTTATCTGGGCCCAAT  
AAACCTTATCAAACCTGCTGTGCA

>796

TCTCTGAACTGAGGAGTCTCATCAGCCTTCCCAGGACCCAAGGACATAGCTCTGGCTAT  
AAATGGTGCCAGTTTTGGTGGGGGAGCTGCTGCTGCTTTATCTGGGCCCAATAAACCTT  
ATCAAACCTGCTGTGCAGCCAGC

>797

AAATGGTGCCAGTTTTGGTGGGGGAGCTGCTGCTGCTTTATCTGGGCCCAATAAACCTT  
ATCAAACCTGCTGTGCAGCCAGCCTTCAGCGCTAAGTGGAATGCTTGGAGCCCAATGC  
TGGCATTAGCCACAGCCTCGC

>798

GAGCTGCTGCTGCTTTATCTGGGCCCAATAAACCTTATCAAACCTGCTGTGCAGCCAGCC  
TTCAGCGCTAAGTGGAATGCTTGGAGCCCAATGCTGGCATTAGCCACAGCCTCGC  
CTGCCTTCTTCCTTTTGTACC

>799

CGCTAAGTGGAATGCTTGGAGCCCAATGCTGGCATTAGCCACAGCCTCGCCTGCC  
TTCTTCCTTTTGTACCTTCTCCACCTCTTAAATTCAGGCATTAATCTCTTTAACT

TACTAACAAGGGCTGGGCTTT

>800

CACCTCTTAAATTCAGGCATTAATCTCTCTTTAACTTACTAACAAGGGCTGGGCTTTT  
AATGGGCAGCGTTTATGAAGCAAGGGAGATTTTCACATAGAGTGAATATGGCACGGGG  
GTGGGGAGGCCAGGGCCATAGA

>801

TAACACTTACTAACAAGGGCTGGGCTTTTAAATGGGCAGCGTTTATGAAGCAAGGGAGA  
TTTTTCACATAGAGTGAATATGGCACGGGGGTGGGGAGGCCAGGGCCATAGAGGATTGT  
GCTTTCTCTCCCATTTGTTTCCAGA

>802

GGCTGGGCTTTTAAATGGGCAGCGTTTATGAAGCAAGGGAGATTTTCACATAGAGTGAAT  
ATGGCACGGGGGTGGGGAGGCCAGGGCCATAGAGGATTGTGCTTTCTCTCCCATTTGT  
TCCAGAGATTCTCTCTTTCTCTG

>803

TGAAGCAAGGGAGATTTTCACATAGAGTGAATATGGCACGGGGGTGGGGAGGCCAGG  
GCCATAGAGGATTGTGCTTTCTCTCCCATTTGTTTCCAGAGATTCTCTCTTTCTCTGATT  
GAGGATTAATAGGAGATTAGGAT

>804

TCACATAGAGTGAATATGGCACGGGGGTGGGGAGGCCAGGGCCATAGAGGATTGTGCT  
TTCTCTCCCATTTGTTTCCAGAGATTCTCTCTTTCTCTGATTTGAGGATTAATAGGAGATT  
AGGATCAGGGGTTAATTGTGTG

>805

TTCTCTCCCATTTGTTTCCAGAGATTCTCTCTTTCTCTGATTTGAGGATTAATAGGAGATT  
AGGATCAGGGGTTAATTGTGTGCTTCTCCTGCTACTGCACTGAGGAGAGGCTGGTAGG  
TGGATGTGGACAGCAAAGCGGA

>806

CCATTGTTTCCAGAGATTCTCTCTTTCTCTGATTTGAGGATTAATAGGAGATTAGGATCA  
GGGGTTAATTGTGTGCTTCTCCTGCTACTGCACTGAGGAGAGGCTGGTAGGTGGATGT  
GGACAGCAAAGCGGAAACCTAC

>807

AGGATTAATAGGAGATTAGGATCAGGGGTTAATTGTGTGCTTCTCCTGCTACTGCACTG  
AGGAGAGGCTGGTAGGTGGATGTGGACAGCAAAGCGGAAACCTACAGCAGGCACTAT  
CTAGGCAGAAGCTCAACAAGTGTA

>808

TTAATAGGAGATTAGGATCAGGGGTTAATTGTGTGCTTCTCCTGCTACTGCACTGAGGA  
GAGGCTGGTAGGTGGATGTGGACAGCAAAGCGGAAACCTACAGCAGGCACTATCTAG  
GCAGAAGCTCAACAAGTGTAGTGA

>809

GGCTGGTAGGTGGATGTGGACAGCAAAGCGGAAACCTACAGCAGGCACTATCTAGGC  
AGAAGCTCAACAAGTGTAGTGATTCTTTCTTCTGTTTCCCTGGTGAGGCACCAGGAGG  
GTCTTTTCTCCTCTCCTTACATCCC

>810

CTGGTAGGTGGATGTGGACAGCAAAGCGGAAACCTACAGCAGGCACTATCTAGGCAG  
AAGCTCAACAAGTGTAGTGATTCTTTCTTCTGTTTCCCTGGTGAGGCACCAGGAGGGT



CTTTTCTCCTCTCCTTACATCCCTC

>811

GGAAACCTACAGCAGGCACTATCTAGGCAGAAGCTCAACAAGTGTAGTGATTCTTTCT  
TCTGTTTCCCTGGTGAGGCACCAGGAGGGTCTTTTCTCCTCTCCTTACATCCCTCCACT  
CTTGCTCTCCTTGCAGCCCAGTT

>812

CACTATCTAGGCAGAAGCTCAACAAGTGTAGTGATTCTTTCTTCTGTTTCCCTGGTGAG  
GCACCAGGAGGGTCTTTTCTCCTCTCCTTACATCCCTCCACTCTTGCTCTCCTTGCAGC  
CCAGTTCTTTCCTAACTTTCTT

>813

CTGGTGAGGCACCAGGAGGGTCTTTTCTCCTCTCCTTACATCCCTCCACTCTTGCTCTC  
CTTGCAAGCCCAGTTCTTTCCTAACTTTCTTTAAATCCCTTTCCTCTAACAGGGTGTATAG  
ACCTTAGTTAGAAAAACAGGT

>814

CCCTCCACTCTTGCTCTCCTTGCAGCCCAGTTCTTTCCTAACTTTCTTTAAATCCCTTTC  
CTCTAACAGGGTGTATAGACCTTAGTTAGAAAAACAGGTAGTCTCTAAATGGGATTGCT  
CTTTATTGTTAATGAAATGAA

>815

TCTCCTTGCAGCCCAGTTCTTTCCTAACTTTCTTTAAATCCCTTTCCTCTAACAGGGTGT  
ATAGACCTTAGTTAGAAAAACAGGTAGTCTCTAAATGGGATTGCTCTTTATTGTTAATGA  
AATGAATACCCAGGGACTGG

>816

CAGTTCTTTCCTAACTTTCTTTAAATCCCTTTCCTCTAACAGGGTGTATAGACCTTAGTT  
AGAAAAACAGGTAGTCTCTAAATGGGATTGCTCTTTATTGTTAATGAAATGAATACCCA  
GGGACTGGGCTTCCCCTCCGC

>817

TTTCCTCTAACAGGGTGTATAGACCTTAGTTAGAAAAACAGGTAGTCTCTAAATGGGAT  
TGCTCTTTATTGTTAATGAAATGAATACCCAGGGACTGGGCTTCCCCTCCGCTTGCCCT  
GGGTTTGATGTGGTTGTATCCC

>818

AAATGGGATTGCTCTTTATTGTTAATGAAATGAATACCCAGGGACTGGGCTTCCCCTCC  
GCTTGCCCTGGGTTTGATGTGGTTGTATCCCGTGCTATCAGAGGAGCCCTTCCTTCACT  
CAAGTGTGTTCCCCTGCCCAGC

>819

ATTGCTCTTTATTGTTAATGAAATGAATACCCAGGGACTGGGCTTCCCCTCCGCTTGCCC  
TGGGTTTGATGTGGTTGTATCCCGTGCTATCAGAGGAGCCCTTCCTTCACTCAAGTGTG  
TCCCCTGCCAGCTCTCTCC

>820

TCCCCTCCGCTTGCCCTGGGTTTGATGTGGTTGTATCCCGTGCTATCAGAGGAGCCCTT  
CCTTCACTCAAGTGTGTTCCCCTGCCAGCTCTCTCCGCAGACTCCTGCTGGGCTGAG  
CTTTCCTGCTCTTAAGAGTCAG

>821

CCCTCCGCTTGCCCTGGGTTTGATGTGGTTGTATCCCGTGCTATCAGAGGAGCCCTTCC  
TCACTCAAGTGTGTTCCCCTGCCAGCTCTCTCCGCAGACTCCTGCTGGGCTGAGCTT

TCCCTGCTCTTAAGAGTCAGGA

>822

CTCAAGTGTGTTCCCCTGCCCAGCTCTCTCCGCAGACTCCTGCTGGGCTGAGCTTTCCC  
TGCTCTTAAGAGTCAGGAGTGGCTCTTGCTGGGATGGAATGACCCGTCTTTGGGGCTG  
CCTCATGAGCGGCTCTTGTGAAC

>823

GTGTTCCCCTGCCCAGCTCTCTCCGCAGACTCCTGCTGGGCTGAGCTTTCCCTGCTCTT  
AAGAGTCAGGAGTGGCTCTTGCTGGGATGGAATGACCCGTCTTTGGGGCTGCCTCATG  
AGCGGCTCTTGTGAACCCGGATC

>824

GACTCCTGCTGGGCTGAGCTTTCCCTGCTCTTAAGAGTCAGGAGTGGCTCTTGCTGGG  
ATGGAATGACCCGTCTTTGGGGCTGCCTCATGAGCGGCTCTTGTGAACCCGGATCAGT  
TCCGATGTGTAAACTCTACCGCCT

>825

TTAAGAGTCAGGAGTGGCTCTTGCTGGGATGGAATGACCCGTCTTTGGGGCTGCCTCA  
TGAGCGGCTCTTGTGAACCCGGATCAGTTCCGATGTGTAAACTCTACCGCCTGGCCTTC  
AGCGAACAGATACAGATTTCTGC

>826

TGGCTCTTGCTGGGATGGAATGACCCGTCTTTGGGGCTGCCTCATGAGCGGCTCTTGTG  
AACCCGGATCAGTTCCGATGTGTAAACTCTACCGCCTGGCCTTCAGCGAACAGATACA  
GATTTCTGCCACCTTCCATGACC

>827

TGGGATGGAATGACCCGTCTTTGGGGCTGCCTCATGAGCGGCTCTTGTGAACCCGGAT  
CAGTTCCGATGTGTAAACTCTACCGCCTGGCCTTCAGCGAACAGATACAGATTTCTGCC  
ACCTTCCATGACCCTACAGTTCA

>828

GATGTGTAAACTCTACCGCCTGGCCTTCAGCGAACAGATACAGATTTCTGCCACCTTCC  
ATGACCCTACAGTTCATGGGACTGGGTCTGGGGCAGTGCCAGAGGCACGCATGGAGGT  
GTGATTCTAGGTGAGTCCTGCGG

>829

ACCGCCTGGCCTTCAGCGAACAGATACAGATTTCTGCCACCTTCCATGACCCTACAGTT  
CATGGGACTGGGTCTGGGGCAGTGCCAGAGGCACGCATGGAGGTGTGATTCTAGGTG  
AGTCCTGCGGAAAACCTCTGGCCC

>830

CTTCAGCGAACAGATACAGATTTCTGCCACCTTCCATGACCCTACAGTTCATGGGACTG  
GGTCTGGGGCAGTGCCAGAGGCACGCATGGAGGTGTGATTCTAGGTGAGTCCTGCGG  
AAAACCTCTGGCCCACCCGTGAGT

>831

CCATGACCCTACAGTTCATGGGACTGGGTCTGGGGCAGTGCCAGAGGCACGCATGGAG  
GTGTGATTCTAGGTGAGTCCTGCGGAAAACCTCTGGCCCACCCGTGAGTCACGGACAG  
AACATGCAGACTCGGGCCTTGGTG

>832

GACCCTACAGTTCATGGGACTGGGTCTGGGGCAGTGCCAGAGGCACGCATGGAGGTG  
TGATTCTAGGTGAGTCCTGCGGAAAACCTCTGGCCCACCCGTGAGTCACGGACAGAAC

ATGCAGACTCGGGCCTTGGTGACAT

>833

GGGGCAGTGCCAGAGGCACGCATGGAGGTGTGATTCTAGGTGAGTCCTGCGGAAAAC  
CTCTGGCCACCCGTGAGTCACGGACAGAACATGCAGACTCGGGCCTTGGTGACATAA  
GCTCCGCATTGCTAAAACCGCGTGA

>834

TAGGTGAGTCCTGCGGAAAACCTCTGGCCACCCGTGAGTCACGGACAGAACATGCA  
GACTCGGGCCTTGGTGACATAAGCTCCGCATTGCTAAAACCGCGTGACCTCGAGGGCT  
GACTGGCCTGAGAACCCTGGATGGC

>835

ACCCGTGAGTCACGGACAGAACATGCAGACTCGGGCCTTGGTGACATAAGCTCCGCAT  
TGCTAAAACCGCGTGACCTCGAGGGCTGACTGGCCTGAGAACCCTGGATGGCGCTCTC  
GGCCACCCCACTCCACCCCAA

>836

TGACTGGCCTGAGAACCCTGGATGGCGCTCTCGGCCACCCCACTCCACCCCAACC  
TCCTGGGCTTCGGTCAGAATCCACAGCCCGTGCCCGAAGAGCGCTTCCCGCCTCTGGC  
ACCCTACCTTCGCTCAGCTCCAGG

>837

CTGGATGGCGCTCTCGGCCACCCCACTCCACCCCAACCTCCTGGGCTTCGGTCAG  
AATCCACAGCCCGTGCCCGAAGAGCGCTTCCCGCCTCTGGCACCTACCTTCGCTCAG  
CTCCAGGGAAAAGGGGAGAGGGCA

>838

AGCGCTTCCCGCCTCTGGCACCTACCTTCGCTCAGCTCCAGGGAAAAGGGGAGAGG  
GCAGCTTTCTGCAGTCAGAGGAAGAGTACATTTTCTTTGGCTGCTCTACCCTCTGAAGT  
AGGGCGGCCAGCTGAAGGAGGACA

>839

CTCTGGCACCTACCTTCGCTCAGCTCCAGGGAAAAGGGGAGAGGGCAGCTTTCTGC  
AGTCAGAGGAAGAGTACATTTTCTTTGGCTGCTCTACCCTCTGAAGTAGGGCGGCCAG  
CTGAAGGAGGACACACTTTTGAGGG

>840

AAAAGGGGAGAGGGCAGCTTTCTGCAGTCAGAGGAAGAGTACATTTTCTTTGGCTGCT  
CTACCCTCTGAAGTAGGGCGGCCAGCTGAAGGAGGACACACTTTTGAGGGGCCAG  
GGTTGTCCAAGCTTCCCCCTGCCCC

>841

TCTTTGGCTGCTCTACCCTCTGAAGTAGGGCGGCCAGCTGAAGGAGGACACACTTTTG  
AGGGGCCAGAGGTTGTCCAAGCTTCCCCCTGCCCCCTGAAGACTGTGCACTGAGCT  
GGGCGCAGTTCTCGGGAAGTGTTC

>842

TTGGCTGCTCTACCCTCTGAAGTAGGGCGGCCAGCTGAAGGAGGACACACTTTTGAGG  
GGCCAGAGGTTGTCCAAGCTTCCCCCTGCCCCCTGAAGACTGTGCACTGAGCTGGGC  
GCAGTTCTCGGGAAGTGTTCAC

>843

CCAGCTGAAGGAGGACACACTTTTGAGGGGCCAGAGGTTGTCCAAGCTTCCCCCTG  
CCCCCTGAAGACTGTGCACTGAGCTGGGCGCAGTTCTCGGGAAGTGTTCACCCAGA

TTGCTGGGGGGCGGGGGGGGGTGGG

>844

CTTTTGAGGGGCCCAGAGGTTGTCCAAGCTTCCCCCTGCCCCCTGAAGACTGTGCACT  
GAGCTGGGCGCAGTTCTCGGGAAGTGTTCACCCAGATTGCTGGGGGGCGGGGGG  
GGTGGGATGAGGGCAGAGCCGAGAG

>845

CAGAGGTTGTCCAAGCTTCCCCCTGCCCCCTGAAGACTGTGCACTGAGCTGGGCGCA  
GTTCTCGGGAAGTGTTCACCCAGATTGCTGGGGGGCGGGGGGGGGTGGGATGAGG  
GCAGAGCCGAGAGGCTGTCCAAGGTT

>846

AGACTGTGCACTGAGCTGGGCGCAGTTCTCGGGAAGTGTTCACCCAGATTGCTGGG  
GGGCGGGGGGGGGTGGGATGAGGGCAGAGCCGAGAGGCTGTCCAAGGTTTGGGAGA  
GAGAAAAGTTTCTCCCAGGACTCGAC

>847

CTCGGGAAGTGTTCACCCAGATTGCTGGGGGGCGGGGGGGGGTGGGATGAGGGCA  
GAGCCGAGAGGCTGTCCAAGGTTTGGGAGAGAGAAAAGTTTCTCCCAGGACTCGACC  
TTGGCCTCCAGCAATCGCGACAGCTA

>848

ACTGTTTCCACCCAGATTGCTGGGGGGCGGGGGGGGGTGGGATGAGGGCAGAGCCGA  
GAGGCTGTCCAAGGTTTGGGAGAGAGAAAAGTTTCTCCCAGGACTCGACCTTGGCCT  
CCAGCAATCGCGACAGCTAAAAACGG

>849

TGCTGGGGGGCGGGGGGGGGTGGGATGAGGGCAGAGCCGAGAGGCTGTCCAAGGTT  
TGGGAGAGAGAAAAGTTTCTCCCAGGACTCGACCTTGGCCTCCAGCAATCGCGACAG  
CTAAAAACGGGTGTCTCGCTTCGACAA

>850

GTTTGGGAGAGAGAGAAAAGTTTCTCCCAGGACTCGACCTTGGCCTCCAGCAATCGCGA  
CAGCTAAAAACGGGTGTCTCGCTTCGACAATAGATCCCCGCGGACCTTCTGGCACCTG  
GTTCACTAGCGCCCGCGAACTCTGC

>851

TTGGGAGAGAGAGAAAAGTTTCTCCCAGGACTCGACCTTGGCCTCCAGCAATCGCGACA  
GCTAAAAACGGGTGTCTCGCTTCGACAATAGATCCCCGCGGACCTTCTGGCACCTGGT  
TCACTAGCGCCCGCGAACTCTGCCT

>852

CAGCAATCGCGACAGCTAAAAACGGGTGTCTCGCTTCGACAATAGATCCCCGCGGACC  
TTCTGGCACCTGGTTCACTAGCGCCCGCGAACTCTGCCTCGGGAGACTTATTGAAATCC  
GGATGCTCAAGCCGGGAGGCGCG

>853

TCACTAGCGCCCGCGAACTCTGCCTCGGGAGACTTATTGAAATCCGGATGCTCAAGCC  
GGGAGGCGCGCAGTAACCAGGAGGATGAGAGGGCCGGGTTTGGGCTAGGAAAGCGG  
CCTTTTAAACAGATGTCAGGGGGAC

>854

CGGGAGACTTATTGAAATCCGGATGCTCAAGCCGGGAGGCGCGCAGTAACCAGGAGG  
ATGAGAGGGCCGGGTTTGGGCTAGGAAAGCGGCCTTTTAAACAGATGTCAGGGGGA

CTGCAGCCCCGAGCCATGAGAAAAAA

>855

GGAGGCGCGCAGTAACCAGGAGGATGAGAGGGCCGGGTTTGGGCTAGGAAAGCGGC  
CTTTTAAAACAGATGTCAGGGGGACTGCAGCCCCGAGCCATGAGAAAAAAGTTAAAG  
GCGAGATGACACGCACTGAATTGGGGC

>856

GTTTGGGCTAGGAAAGCGGCCTTTTAAAACAGATGTCAGGGGGACTGCAGCCCCGAG  
CCATGAGAAAAAAGTTAAAGGCGAGATGACACGCACTGAATTGGGGCAAACATTGGA  
AGAGGAGACAAAACCTGCGTGCTTGAG

>857

GAGAAAAAAGTTAAAGGCGAGATGACACGCACTGAATTGGGGCAAACATTGGAAGAG  
GAGACAAAACCTGCGTGCTTGAGCACCGGGGTGCGGGGAGGGGGGGACAAAACCCGT  
ATCCAGTGCAAATTAATACTTGGGAG

>858

GCGAGATGACACGCACTGAATTGGGGCAAACATTGGAAGAGGAGACAAAACCTGCGTG  
CTTGAGCACCGGGGTGCGGGGAGGGGGGGACAAAACCCGTATCCAGTGCAAATTA  
ATCTTGGGAGTAGGTGGGGGCTGCTG

>859

GCAAACATTGGAAGAGGAGACAAAACCTGCGTGCTTGAGCACCGGGGTGCGGGGAGG  
GGGGGACAAAACCCGTATCCAGTGCAAATTAATACTTGGGAGTAGGTGGGGGCTGCT  
GCGCGCCCTTCACCCTCAGTTCCCT

>860

CGTGCTTGAGCACCGGGGTGCGGGGAGGGGGGGACAAAACCCGTATCCAGTGCAAAT  
TAAATCTTGGGAGTAGGTGGGGGCTGCTGCGCGCCCTTCACCCTCAGTTCCCTATTA  
AGGATTCTGAGTCCCCATGCACTC

>861

CTTGAGCACCGGGGTGCGGGGAGGGGGGGACAAAACCCGTATCCAGTGCAAATTA  
ATCTTGGGAGTAGGTGGGGGCTGCTGCGCGCCCTTCACCCTCAGTTCCCTATTAAGGA  
TTCTGAGTCCCCATGCACTCCTGT

>862

CAAAACCCGTATCCAGTGCAAATTAATACTTGGGAGTAGGTGGGGGCTGCTGCGCGC  
CCTTCACCCTCAGTTCCCTATTAAGGATTCTGAGTCCCCATGCACTCCTGTCTCTGGC  
TCCTTCCTTCCTCTCCGCTCGG

>863

TTAAATCTTGGGAGTAGGTGGGGGCTGCTGCGCGCCCTTCACCCTCAGTTCCCTATT  
AAGGATTCTGAGTCCCCATGCACTCCTGTCTCTGGCTCCTTCCTTCCTCTCCGCTCGG  
CCGGTGAGAGGCGGCCCGCCGGC

>864

AGGTGGGGGCTGCTGCGCGCCCTTCACCCTCAGTTCCCTATTAAGGATTCTGAGTCCC  
CATGCACTCCTGTCTCTGGCTCCTTCCTTCCTCTCCGCTCGGCCGGTGAGAGGCGGCC  
GCCGGCGCCCCAGCAGCAGCTA

>865

CCCCTATTAAGGATTCTGAGTCCCCATGCACTCCTGTCTCTGGCTCCTTCCTTCCTCTC  
CGCTCGGCCGGTGAGAGGCGGCCCGCCGGCGCCCCAGCAGCAGCTAGATGTCAGGCGA

AGCCCGGAGCGCGGAGCGCGGGG

>866

CTCTGGCTCCTTCCTTCCTCTCCGCTCGGCCGGTGAGAGGCGGCCGCGGCCAG  
CAGCAGCTAGATGTCAGGCGAAGCCCGGAGCGCGGAGCGCGGGGAAGGGAGGGGAA  
GGGAGGGGAGGGGAAAGGAGGGGTGG

>867

AGATGTCAGGCGAAGCCCGGAGCGCGGAGCGCGGGGAAGGGAGGGGAAGGGAGGG  
GAGGGGAAGGAGGGGTGGGGCGGGGAGCGCGCGGGCTCGGCCAGTGCAGGGGTG  
GTGGGCGGGCTGAGCCCGGGGACGGCGCG

>868

CGGGGAAGGGAGGGGAAGGGAGGGGAGGGGAAGGAGGGGTGGGGCGGGGAGCGC  
GCGCGGGCTCGGCCAGTGCAGGGGTGGTGGGCGGGCTGAGCCCGGGGACGGCGCGGG  
AGGGGGGAGGGAAGGGGGGCAGCTGTGGG

>869

GGGAGGGGAAGGGAGGGGAGGGGAAGGAGGGGTGGGGCGGGGAGCGCGCGCGGG  
CTCGGCCAGTGCAGGGGTGGTGGGCGGGCTGAGCCCGGGGACGGCGCGGGAGGGGGG  
AGGGAAGGGGGGCAGCTGTGGGCAGGGAG

>870

GGCCAGTGCAGGGGTGGTGGGCGGGCTGAGCCCGGGGACGGCGCGGGAGGGGGGAGG  
GAAGGGGGGCAGCTGTGGGCAGGGAGCCGGGCTCGGCCGCCAGCACTAAAGATGGA  
GAGGCGCCGGGGCCTTGCAGGGGAGGGG

>871

GGGAGCCGGGCTCGGCCGCCAGCACTAAAGATGGAGAGGCGCCGGGGCCTTGCAGGG  
GAGGGGGCTCGGCGTTGACGTGGGACGCGGCGGAGGCGCAGCAGCCGGTGGTGATTT  
GCTAACCTCGCAGCAGAGAGGAGTTG

>872

CGGGCTCGGCCGCCAGCACTAAAGATGGAGAGGCGCCGGGGCCTTGCAGGGGAGGG  
GGCTCGGCGTTGACGTGGGACGCGGCGGAGGCGCAGCAGCCGGTGGTGATTTGCTAA  
CCTCGCAGCAGAGAGGAGTTGAGGGCG

>873

AGAGGCGCCGGGGCCTTGCAGGGGAGGGGGCTCGGCGTTGACGTGGGACGCGGCGG  
AGGCGCAGCAGCCGGTGGTGATTTGCTAACCTCGCAGCAGAGAGGAGTTGAGGGCGA  
TGAGAGCGGGTACTGCGAACTGCCGGG

>874

GGCGCCGGGGCCTTGCAGGGGAGGGGGCTCGGCGTTGACGTGGGACGCGGCGGAGG  
CGCAGCAGCCGGTGGTGATTTGCTAACCTCGCAGCAGAGAGGAGTTGAGGGCGATGA  
GAGCGGGTACTGCGAACTGCCGGGCGA

>875

CGGCGTTGACGTGGGACGCGGCGGAGGCGCAGCAGCCGGTGGTGATTTGCTAACCTC  
GCAGCAGAGAGGAGTTGAGGGCGATGAGAGCGGGTACTGCGAACTGCCGGGCGATGC  
TGTCGCTGCCGCCGTGATACGGAGAG

>876

GCGGAGGCGCAGCAGCCGGTGGTGATTTGCTAACCTCGCAGCAGAGAGGAGTTGAGG  
GCGATGAGAGCGGGTACTGCGAACTGCCGGGCGATGCTGTCGCTGCCGCCGTGATACG

GAGAGCAACAGTTCCCCAGCAACAC

>877

TTTGCTAACCTCGCAGCAGAGAGGAGTTGAGGGCGATGAGAGCGGGTACTGCGAACT  
GCCGGGCGATGCTGTCTGCTGCCGCCGTGATACGGAGAGCAACAGTTCCCCAGCAACA  
CCCCTCCCCGACACAGGCACACACCC

>878

GCAGCAGAGAGGAGTTGAGGGCGATGAGAGCGGGTACTGCGAACTGCCGGGCGATGC  
TGTCGCTGCCGCCGTGATACGGAGAGCAACAGTTCCCCAGCAACACCCCTCCCCGACA  
CAGGCACACACCCCCCGACAGGCAC

>879

CAGTTCCCCAGCAACACCCCTCCCCGACACAGGCACACACCCCCCGACAGGCACGCA  
CACCCACCCACAGTGCCCGGCTCGGCTGCGGTGAGTGAGGGGCCGGGAAGAGGGCGC  
ACCGCCAGCGAGCGCCGCGCGCCGG

>880

CCTCCCCGACACAGGCACACACCCCCCGACAGGCACGCACACCCACCCACAGTGCC  
CGGCTCGGCTGCGGTGAGTGAGGGGCCGGGAAGAGGCGCACCGCCAGCGAGCGCC  
GCGCGCCGGGGCTTCCCGGGGCTGGAG

>881

GAGTGAGGGGCCGGGAAGAGGCGCACCGCCAGCGAGCGCCGCGCGCCGGGGCTTC  
CCGGGGCTGGAGAGGTCTGGGGGGCGCGCGCTCGCTTCGGCCACTCGGCCGCTGGGC  
TTGTGCCTTTTTTATTTGGCGTGTTCC

>882

GCCGGGGCTTCCCGGGGCTGGAGAGGTCTGGGGGGCGCGCGCTCGCTTCGGCCACTC  
GGCCGCTGGGCTTGTGCCTTTTTTATTTGGCGTGTTCCCTTCCTGCCGCTGCAGCCGTC  
GCCGCCACCGGTTGGGGGTCGGCT

>883

TGAGAGAGGTCTGGGGGGCGCGCGCTCGCTTCGGCCACTCGGCCGCTGGGCTTGTGCC  
TTTTTTATTTGGCGTGTTCCCTTCCTGCCGCTGCAGCCGTCGCCGCCACCGGTTGGGGG  
TCGGCTAGAAGGGGGAGCCCCGGC

>884

CGCTTCGGCCACTCGGCCGCTGGGCTTGTGCCTTTTTTATTTGGCGTGTTCCCTTCCTG  
CCGCTGCAGCCGTCGCCGCCACCGGTTGGGGGTCGGCTAGAAGGGGGAGCCCCGGCT  
GTCAGCCTGGGCGCAGCTGCCTCC

>885

CGGCCGCTGGGCTTGTGCCTTTTTTATTTGGCGTGTTCCCTTCCTGCCGCTGCAGCCGT  
CGCCGCCACCGGTTGGGGGTCGGCTAGAAGGGGGAGCCCCGGCTGTCAGCCTGGGCG  
CAGCTGCCTCCCCAGCCCTTCCTC

>886

TGGGCTTGTGCCTTTTTTATTTGGCGTGTTCCCTTCCTGCCGCTGCAGCCGTCGCCGCC  
ACCGGTTGGGGGTCGGCTAGAAGGGGGAGCCCCGGCTGTCAGCCTGGGCGCAGCTGC  
CTCCCCAGCCCTTCCTCTTCAGGG

>887

TGTTCCCTTCCTGCCGCTGCAGCCGTCGCCGCCACCGGTTGGGGGTCGGCTAGAAGGG  
GGAGCCCCGGCTGTCAGCCTGGGCGCAGCTGCCTCCCCAGCCCTTCCTCTTCAGGGCA

CGGTCGGGGTGAGAGGTGGGGGGC

>888

GCTAGAAGGGGGAGCCCCGGCTGTCAGCCTGGGCGCAGCTGCCTCCCCAGCCCTTCCT  
CTTCAGGGCACGGTCGGGGTGAGAGGTGGGGGGCGTAGCGGTGTGCGGGGGCTGAG  
GGCGTGAGCAGAGGGGTCGGGGATCC

>889

AGGGGGAGCCCCGGCTGTCAGCCTGGGCGCAGCTGCCTCCCCAGCCCTTCCTCTTCAG  
GGCACGGTCGGGGTGAGAGGTGGGGGGCGTAGCGGTGTGCGGGGGCTGAGGGCGTG  
AGCAGAGGGGTCGGGGATCCGGAGGC

>890

GTCAGCCTGGGCGCAGCTGCCTCCCCAGCCCTTCCTCTTCAGGGCACGGTCGGGGTGA  
GAGGTGGGGGGCGTAGCGGTGTGCGGGGGCTGAGGGCGTGAGCAGAGGGGTCGGGG  
ATCCGGAGGCTTTGTACCGCCAGGGG

>891

CTGGGCGCAGCTGCCTCCCCAGCCCTTCCTCTTCAGGGCACGGTCGGGGTGAGAGGT  
GGGGGGCGTAGCGGTGTGCGGGGGCTGAGGGCGTGAGCAGAGGGGTCGGGGATCCG  
GAGGCTTTGTACCGCCAGGGGCTGGCG

>892

CAGCCCTTCCTCTTCAGGGCACGGTCGGGGTGAGAGGTGGGGGGCGTAGCGGTGTGC  
GGGGGCTGAGGGCGTGAGCAGAGGGGTCGGGGATCCGGAGGCTTTGTACCGCCAGGG  
GCTGGCGGAGCAACAGAGCCCGTGGG

>893

TTCAGGGCACGGTCGGGGTGAGAGGTGGGGGGCGTAGCGGTGTGCGGGGGCTGAGG  
GCGTGAGCAGAGGGGTCGGGGATCCGGAGGCTTTGTACCGCCAGGGGCTGGCGGAGC  
AACAGAGCCCGTGGGTGCTCTTATGTA

>894

AGGGCGTGAGCAGAGGGGTCGGGGATCCGGAGGCTTTGTACCGCCAGGGGCTGGCGG  
AGCAACAGAGCCCGTGGGTGCTCTTATGTATGCGGACCGGTGCGCGGGCGCAAGATAA  
GGTTGTGGTTTATTTATTTGTGTGT

>895

CGTGAGCAGAGGGGTCGGGGATCCGGAGGCTTTGTACCGCCAGGGGCTGGCGGAGCA  
ACAGAGCCCGTGGGTGCTCTTATGTATGCGGACCGGTGCGCGGGCGCAAGATAAGGTT  
GTGGTTTATTTATTTGTGTGTTTAT

>896

GGGGCTGGCGGAGCAACAGAGCCCGTGGGTGCTCTTATGTATGCGGACCGGTGCGCG  
GGCGCAAGATAAGGTTGTGGTTTATTTATTTGTGTGTTTATTCGCCGGCCGGCTGGGAA  
GCTAGAATCGGAGGAGCTGACGAG

>897

GCTGGCGGAGCAACAGAGCCCGTGGGTGCTCTTATGTATGCGGACCGGTGCGCGGGC  
GCAAGATAAGGTTGTGGTTTATTTATTTGTGTGTTTATTCGCCGGCCGGCTGGGAAGCT  
AGAATCGGAGGAGCTGACGAGTAG

>898

CCGTGGGTGCTCTTATGTATGCGGACCGGTGCGCGGGCGCAAGATAAGGTTGTGGTTTA  
TTTATTTGTGTGTTTATTCGCCGGCCGGCTGGGAAGCTAGAATCGGAGGAGCTGACGA



GTAGATCTGGGGGCGGAGGGGAG

>899

GGTTGTGGTTTATTTATTTGTGTGTTTATTCGCCGGCCGGCTGGGAAGCTAGAATCGGA  
GGAGCTGACGAGTAGATCTGGGGGCGGAGGGGAGCAGGACTGGGACTGCTTACGTTT  
TGTTTCTCTTTGAGAAAACGTGGT

>900

GGGAAGCTAGAATCGGAGGAGCTGACGAGTAGATCTGGGGGCGGAGGGGAGCAGGA  
CTGGGACTGCTTACGTTTTGTTTCTCTTTGAGAAAACGTGGTGGGCTTTTTCTTGATTG  
GACTTGATCCCCACCCCCCTTTTGC

>901

GCTAGAATCGGAGGAGCTGACGAGTAGATCTGGGGGCGGAGGGGAGCAGGACTGGG  
ACTGCTTACGTTTTGTTTCTCTTTGAGAAAACGTGGTGGGCTTTTTCTTGATTGGACTT  
GATCCCCACCCCCCTTTTGCAGGGG

>902

GACGAGTAGATCTGGGGGCGGAGGGGAGCAGGACTGGGACTGCTTACGTTTTGTTTCT  
CTTTGAGAAAACGTGGTGGGCTTTTTCTTGATTGGACTTGATCCCCACCCCCCTTTTGC  
AGGGGAGGGAGGGAAGCTCCAGA

>903

GGTGGGCTTTTTCTTGATTGGACTTGATCCCCACCCCCCTTTTGCAGGGGAGGGAGGG  
AAGCTCCAGAGGGTCTGCAGCGCTGCGGGCCCTCCTCGGCTCTCGGCGGGACCGGCG  
GTGACACCGGAGCTCGCCGTGCGCT

>904

AGGGGAGGGAGGGAAGCTCCAGAGGGTCTGCAGCGCTGCGGGCCCTCCTCGGCTCTC  
GGCGGGACCGGCGGTGACACCGGAGCTCGCCGTGCGCTCCCGGCCGCTCTCGGTGGG  
TGCCGGTCTCTGCACCTGATGCGTTC

>905

CCAGAGGGTCTGCAGCGCTGCGGGCCCTCCTCGGCTCTCGGCGGGACCGGCGGTGAC  
ACCGGAGCTCGCCGTGCGCTCCCGGCCGCTCTCGGTGGGTGCCGGTCTCTGCACCTGA  
TGCGTTCGGGATGCCTTTCCACCC

>906

GGGCCCTCCTCGGCTCTCGGCGGGACCGGCGGTGACACCGGAGCTCGCCGTGCGCTC  
CCGGCCGCTCTCGGTGGGTGCCGGTCTCTGCACCTGATGCGTTCGGGATGCCTTTCCC  
ACCCTGGCGCGCCCGCCGCTAGCTC

>907

CCTCCTCGGCTCTCGGCGGGACCGGCGGTGACACCGGAGCTCGCCGTGCGCTCCCGG  
CCGCTCTCGGTGGGTGCCGGTCTCTGCACCTGATGCGTTCGGGATGCCTTTCCACCCCT  
GGCGCGCCCGCCGCTAGCTCGCAC

>908

GGCGGTGACACCGGAGCTCGCCGTGCGCTCCCGGCCGCTCTCGGTGGGTGCCGGTCT  
CTGCACCTGATGCGTTCGGGATGCCTTTCCACCCCTGGCGCGCCCGCCGCTAGCTCGC  
ACAGCGCCTCGCACACTCCCGCACG

>909

CACCCTGGCGCGCCCGCCGCTAGCTCGCACAGCGCCTCGCACACTCCCGCACGCGCTT  
GAAATGCGCACGGTCCCGCCGGCCCGCGGAACCACCCGGACGCACGGAGCGCTCCGC

ACCGACTCGCTCGCCGCCTCCCCGA

>910

CGCGGAACCACCCGGACGCACGGAGCGCTCCGCACCGACTCGCTCGCCGCCTCCCCG  
AGACGCTCGCACCGTGCTTGGGCCGGGCGCGCTGGCCGCTGGCGCCGCTGGCCAGAG  
GCCTGGGACCCAGCCGGTCGCTCCCA

>911

CGCTCGCACCGTGCTTGGGCCGGGCGCGCTGGCCGCTGGCGCCGCTGGCCAGAGGCC  
TGGGACCCAGCCGGTCGCTCCAGGGGGTCACGGCCCTGGGTTCGAGAGGGAGGGC  
GGGACAGACCCCTTCTCGCCTTTCCTCC

>912

TTGGGCCGGGCGCGCTGGCCGCTGGCGCCGCTGGCCAGAGGCCTGGGACCCAGCCGG  
TCGCTCCCAGGGGGTCACGGCCCTGGGTTCGAGAGGGAGGGCGGGCAGACCCCTTCT  
CGCCTTTCCTCCCACAACTCGCTGCG

>913

CCTGGGTTCGAGAGGGAGGGCGGGCAGACCCCTTCTCGCCTTTCCTCCCACAACTCG  
CTGCGGGGCTTTTGTGCTTCCCCTTCGCCGCGGGGCGGGTCCGCCTCCCCTGCCGCTC  
TCGCCGCGGAGTCCAGCCCGCCCGG

>914

AGACCCCTTCTCGCCTTTCCTCCCACAACTCGCTGCGGGGCTTTTGTGCTTCCCCTTCG  
CCGCGGGGCGGGTCCGCCTCCCCTGCCGCTCTCGCCGCGGAGTCCAGCCCGCCCGGA  
CTGTCGCCGTTCTCCCCGTCTCT

>915

CGCTGCGGGGCTTTTGTGCTTCCCCTTCGCCGCGGGGCGGGTCCGCCTCCCCTGCCGC  
TCTCGCCGCGGAGTCCAGCCCGCCCGGACTGTCGCCGTTCTCTCCCCTCTCTTTTCGCTT  
TCCCTCGTCCCTAGCTCAGCTCT

>916

CTTCCCCTTCGCCGCGGGGCGGGTCCGCCTCCCCTGCCGCTCTCGCCGCGGAGTCCAG  
CCCGCCCGGACTGTCGCCGTTCTCCCCGTCTCTTTCGCTTTCCTCGTCCCTAGCTCA  
GCTCTCCTTCTTTCAGGAGTCTA

>917

CTTCGCCGCGGGGCGGGTCCGCCTCCCCTGCCGCTCTCGCCGCGGAGTCCAGCCCGCC  
CGGACTGTCGCCGTTCTCCCCGTCTCTTTCGCTTTCCTCGTCCCTAGCTCAGCTCTC  
CTTCTTTCAGGAGTCTAGCTCCT

>918

GGGCGGGTCCGCCTCCCCTGCCGCTCTCGCCGCGGAGTCCAGCCCGCCCGGACTGTGCG  
CCGTTCTCCCCGTCTCTTTCGCTTTCCTCGTCCCTAGCTCAGCTCTCCTTCTTTCAGG  
AGTCTAGCTCCTCGGGAAAAGT

>919

GGACTGTCGCCGTTCTCCCCGTCTCTTTCGCTTTCCTCGTCCCTAGCTCAGCTCTCCT  
TCTTTCAGGAGTCTAGCTCCTCGGGAAAAGTTGCTTCCCCAAGTTTGCTGAAGTCGTC  
TCCAAGTCTCGGTGGGGGTCGC

>920

CCGTCTCTTTCGCTTTCCTCGTCCCTAGCTCAGCTCTCCTTCTTTCAGGAGTCTAGCTC  
CTCGGGAAAAGTTGCTTCCCCAAGTTTGCTGAAGTCGTCTCCAAGTCTCGGTGGGGGT

CGCTGGGAACTGGGGGGGTGTG

>921

CCCTAGCTCAGCTCTCCTTCTTTCAGGAGTCTAGCTCCTCGGGAAAAGTTGCTTCCCCA  
AGTTTGCTGAAGTCGTCTCCAAGTCTCGGTGGGGGTCGCTGGGAACTGGGGGGGTGT  
GAGAGCGCGGTTCGATCCCCGGAGC

>922

CTCTCCTTCTTTCAGGAGTCTAGCTCCTCGGGAAAAGTTGCTTCCCCAAGTTTGCTGAA  
GTCGTCTCCAAGTCTCGGTGGGGGTCGCTGGGAACTGGGGGGGTGTGAGAGCGCGGT  
CGATCCCCGGAGCTCGGGCGGGTT

>923

TTCTTTCAGGAGTCTAGCTCCTCGGGAAAAGTTGCTTCCCCAAGTTTGCTGAAGTCGT  
CTCCAAGTCTCGGTGGGGGTCGCTGGGAACTGGGGGGGTGTGAGAGCGCGGTTCGATC  
CCCGGAGCTCGGGCGGGTTATCGCC

>924

GAAAAGTTGCTTCCCCAAGTTTGCTGAAGTCGTCTCCAAGTCTCGGTGGGGGTCGCTG  
GAACTGGGGGGGTGTGAGAGCGCGGTTCGATCCCCGGAGCTCGGGCGGGTTATCGCC  
GGCTCTTCCCCGCGCCGCCTGGACT

>925

CAAGTCTCGGTGGGGGTCGCTGGGAACTGGGGGGGTGTGAGAGCGCGGTTCGATCCCC  
GGAGCTCGGGCGGGTTATCGCCGGCTCTTCCCCGCGCCGCCTGGACTGGACGCTGCAG  
CCAGCGCCAGCCGATCGCGGGCGC

>926

GCTCTTCCCCGCGCCGCCTGGACTGGACGCTGCAGCCAGCGCCAGCCGGATCGCGGG  
CGCCGAGCGGCGGGTGGGGGAGACGGCTGCCCCGTGGGCGCCCAGATTTCCCTCAGG  
ACCCAAAAAGCTTGTTTCAGGGCGCC

>927

GACTGGACGCTGCAGCCAGCGCCAGCCGGATCGCGGGCGCCGAGCGGCGGGTGGGG  
GAGACGGCTGCCCCGTGGGCGCCCAGATTTCCCTCAGGACCCAAAAAGCTTGTTTCAG  
GGCGCCAAGCTTCCATTCTTTTGGCT

>928

CGCCGAGCGGCGGGTGGGGGAGACGGCTGCCCCGTGGGCGCCCAGATTTCCCTCAGG  
ACCCAAAAAGCTTGTTTCAGGGCGCCAAGCTTCCATTCTTTTGGCTGTTCCCTCCCTAG  
TTCTCAGAAACCCGATGTCTGCG

>929

GTGGGCGCCCAGATTTCCCTCAGGACCCAAAAAGCTTGTTTCAGGGCGCCAAGCTTCC  
ATTCTTTTGGCTGTTCCCTCCCTAGTTCTCAGAAACCCGATGTCTGCGGGAAAGCACG  
CGGTGGCTCGGCTCGGCTGAATG

>930

ATTTCCTCAGGACCCAAAAAGCTTGTTTCAGGGCGCCAAGCTTCCATTCTTTTGGCTG  
TTCCCTCCCTAGTTCTCAGAAACCCGATGTCTGCGGGAAAGCACGCGGTGGCTCGGC  
TCGGCTGAATGGTCATCCCAACC

>931

AAAGCTTGTTTCAGGGCGCCAAGCTTCCATTCTTTTGGCTGTTCCCTCCCTAGTTCTCA  
GAAACCCCGATGTCTGCGGGAAAGCACGCGGTGGCTCGGCTCGGCTGAATGGTCATCC

CAACCTTGACGGCCTCCGTCCCC

>932

GTTCCCTCCCTAGTTCTCAGAAACCCCGATGTCTGCGGGAAAGCACGCGGTGGCTCGG  
CTCGGCTGAATGGTCATCCCAACCTTGACGGCCTCCGTCCCCACCCCGGGGCGGGCAG  
CAAAAATGTCTTGACCAGCCGTCC

>933

CCCGATGTCTGCGGGAAAGCACGCGGTGGCTCGGCTCGGCTGAATGGTCATCCCAACC  
TTGACGGCCTCCGTCCCCACCCCGGGGCGGGCAGCAAAAATGTCTTGACCAGCCGTCC  
TGTGAATCCTTTCTGCGTGAGCTT

>934

CTCGGCTCGGCTGAATGGTCATCCCAACCTTGACGGCCTCCGTCCCCACCCCGGGGCG  
GGCAGCAAAAATGTCTTGACCAGCCGTCTGTGAATCCTTTCTGCGTGAGCTTGGTGG  
CTCCTGAACTGATAGAGCTCCTTC

>935

AATGGTCATCCCAACCTTGACGGCCTCCGTCCCCACCCCGGGGCGGGCAGCAAAAATG  
TCTTGACCAGCCGTCTGTGAATCCTTTCTGCGTGAGCTTGGTGGCTCCTGAACTGATA  
GAGCTCCTTCTGGGGGTGGAGGC

>936

CGGCCTCCGTCCCCACCCCGGGGCGGGCAGCAAAAATGTCTTGACCAGCCGTCTGTG  
AATCCTTTCTGCGTGAGCTTGGTGGCTCCTGAACTGATAGAGCTCCTTCTGGGGGTGG  
AGGCAAGCAAGCAGTGTTCTGAAGA

>937

GACCAGCCGTCTGTGAATCCTTTCTGCGTGAGCTTGGTGGCTCCTGAACTGATAGAG  
CTCCTTCTGGGGGTGGAGGCAAGCAAGCAGTGTTCTGAAGAGTGAGGGAGAGACCTTG  
CTGTTCTTCTGCTCTCAGTGCATTCA

>938

ATCCTTTCTGCGTGAGCTTGGTGGCTCCTGAACTGATAGAGCTCCTTCTGGGGGTGGA  
GGCAAGCAAGCAGTGTTCTGAAGAGTGAGGGAGAGACCTTGCTGTTCTTGCTCTCAG  
TGCATTCACTGCAATATTGGTCGCT

>939

AACTGATAGAGCTCCTTCTGGGGGTGGAGGCAAGCAAGCAGTGTTCTGAAGAGTGAGG  
GAGAGACCTTGCTGTTCTTGCTCTCAGTGCATTCACTGCAATATTGGTCGCTGTAAGA  
CAGACACGGGGAGGGTCCTGGGCC

>940

CTTCTGGGGGTGGAGGCAAGCAAGCAGTGTTCTGAAGAGTGAGGGAGAGACCTTGCTG  
TTCCTTGCTCTCAGTGCATTCACTGCAATATTGGTCGCTGTAAGACAGACACGGGGAG  
GGTCCTGGGCCTGCGCGGTCTTTCT

>941

CAAGCAGTGTTCTGAAGAGTGAGGGAGAGACCTTGCTGTTCTTGCTCTCAGTGCATT  
ACTGCAATATTGGTCGCTGTAAGACAGACACGGGGAGGGTCCTGGGCCTGCGCGGTCT  
TTCTAACACTCCTTTAAGCGAGGT

>942

AGACCTTGCTGTTCTTGCTCTCAGTGCATTCACTGCAATATTGGTCGCTGTAAGACAG  
ACACGGGGAGGGTCCTGGGCCTGCGCGGTCTTTCTAACACTCCTTTAAGCGAGGTTTG

GAGTCTAGGAGCCCTCTTATTGA

>943

TGCTCTCAGTGCATTCACTGCAATATTGGTCGCTGTAAGACAGACACGGGGAGGGTCC  
TGGGCCTGCGCGGTCTTTCTAACACTCCTTTAAGCGAGGTTTGGAGTCTAGGAGCCCT  
CTTATTGATCCCGGACAGGCTCTG

>944

TGGTCGCTGTAAGACAGACACGGGGAGGGTCCTGGGCCTGCGCGGTCTTTCTAACACT  
CCTTTAAGCGAGGTTTGGAGTCTAGGAGCCCTCTTATTGATCCCGGACAGGCTCTGGG  
AGAGGCCTTTGTTTCCCAGCCCTG

>945

CTCCTTTAAGCGAGGTTTGGAGTCTAGGAGCCCTCTTATTGATCCCGGACAGGCTCTGG  
GAGAGGCCTTTGTTTCCCAGCCCTGTCTTCCCTTCGTA CTGGTTGTA ACTCACACCACA  
GGTGCTGGTGCCAATATCACTT

>946

TAGGAGCCCTCTTATTGATCCCGGACAGGCTCTGGGAGAGGCCTTTGTTTCCCAGCCCT  
GTCTTCCCTTCGTA CTGGTTGTA ACTCACACCACAGGTGCTGGTGCCAATATCACTTCC  
AGCGCCTCTGAGCCATGTCCAG

>947

CCCTCTTATTGATCCCGGACAGGCTCTGGGAGAGGCCTTTGTTTCCCAGCCCTGTCTTC  
CCTTCGTA CTGGTTGTA ACTCACACCACAGGTGCTGGTGCCAATATCACTTCCAGCGCC  
TCTGAGCCATGTCCAGCATCCC

>948

CAGGCTCTGGGAGAGGCCTTTGTTTCCCAGCCCTGTCTTCCCTTCGTA CTGGTTGTAAC  
TCACACCACAGGTGCTGGTGCCAATATCACTTCCAGCGCCTCTGAGCCATGTCCAGCAT  
CCCTTGCTGCCCCCTGGTCACAG

>949

CCCTTCGTA CTGGTTGTA ACTCACACCACAGGTGCTGGTGCCAATATCACTTCCAGCGC  
CTCTGAGCCATGTCCAGCATCCCTTGCTGCCCCCTGGTCACAGGACTTGCAGACTCCTTG  
GAGCCTGTGGGACACACGTGGA

>950

ACCACAGGTGCTGGTGCCAATATCACTTCCAGCGCCTCTGAGCCATGTCCAGCATCCCT  
TGCTGCCCCCTGGTCACAGGACTTGCAGACTCCTTGGAGCCTGTGGGACACACGTGGA  
GTTACACACCCAGCCCAGCATGA

>951

AGCGCCTCTGAGCCATGTCCAGCATCCCTTGCTGCCCCCTGGTCACAGGACTTGCAGAC  
TCCTTGAGCCTGTGGGACACACGTGGAGTTCACACACCCAGCCCAGCATGAGCACT  
CCTGGCTGTAGGGGACCATATTTAA

>952

GCCATGTCCAGCATCCCTTGCTGCCCCCTGGTCACAGGACTTGCAGACTCCTTGGAGCC  
TGTGGGACACACGTGGAGTTCACACACCCAGCCCAGCATGAGCACTCCTGGCTGTAG  
GGGACCATATTTAACTATGGTCTCT

>953

GCAGACTCCTTGGAGCCTGTGGGACACACGTGGAGTTCACACACCCAGCCCAGCATG  
AGCACTCCTGGCTGTAGGGGACCATATTTAACTATGGTCTCTCTCCATACCTTAATGACC

CATCCTTCTTCGTTTTTTAGATC

>954

ACACACGTGGAGTTCACACACCCAGCCCAGCATGAGCACTCCTGGCTGTAGGGGACC  
ATATTTAACTATGGTCTCTCTCCATACCTTAATGACCCATCCTTCTTCGTTTTTTAGATCC  
TCCTGTCCACCGGGCAGTTGTG

>955

GCACTCCTGGCTGTAGGGGACCATATTTAACTATGGTCTCTCTCCATACCTTAATGACCC  
ATCCTTCTTCGTTTTTTAGATCCTCCTGTCCACCGGGCAGTTGTGGGCAGGAGGGTAGG  
TACGACACCTTACGTAAGTGT

>956

GGACCATATTTAACTATGGTCTCTCTCCATACCTTAATGACCCATCCTTCTTCGTTTTTTA  
GATCCTCCTGTCCACCGGGCAGTTGTGGGCAGGAGGGTAGGTACGACACCTTACGTAA  
GTGTGTGTGTGTAAACACACA

>957

ACTATGGTCTCTCTCCATACCTTAATGACCCATCCTTCTTCGTTTTTTAGATCCTCCTGTC  
CACCGGGCAGTTGTGGGCAGGAGGGTAGGTACGACACCTTACGTAAGTGTGTGTGTGT  
AAACACACACACACTTTTTTT

>958

CCTTAATGACCCATCCTTCTTCGTTTTTTAGATCCTCCTGTCCACCGGGCAGTTGTGGGC  
AGGAGGGTAGGTACGACACCTTACGTAAGTGTGTGTGTGTGTAAACACACACACACTTTT  
TTTTTTTTTTCTGAGACGGAG

>959

CCTTCTTCGTTTTTTAGATCCTCCTGTCCACCGGGCAGTTGTGGGCAGGAGGGTAGGTA  
CGACACCTTACGTAAGTGTGTGTGTGTGTAAACACACACACACTTTTTTTTTTTTTCTG  
AGACGGAGTTTGTCTCCTGTTG

>960

CTTCGTTTTTTAGATCCTCCTGTCCACCGGGCAGTTGTGGGCAGGAGGGTAGGTACGA  
CACCTTACGTAAGTGTGTGTGTGTGTAAACACACACACACTTTTTTTTTTTTTCTGAGA  
CGGAGTTTGTCTCCTGTTGCCCA

>961

TCGTTTTTTAGATCCTCCTGTCCACCGGGCAGTTGTGGGCAGGAGGGTAGGTACGACA  
CCTTACGTAAGTGTGTGTGTGTGTAAACACACACACACTTTTTTTTTTTTTCTGAGACG  
GAGTTTGTCTCCTGTTGCCAGG

>962

TAGATCCTCCTGTCCACCGGGCAGTTGTGGGCAGGAGGGTAGGTACGACACCTTACGT  
AAGTGTGTGTGTGTAAACACACACACACTTTTTTTTTTTTTCTGAGACGGAGTTTGT  
CTCCTGTTGCCAGGCTGGAGTG

>963

GGTACGACACCTTACGTAAGTGTGTGTGTGTGTAAACACACACACACTTTTTTTTTTTTT  
TCTGAGACGGAGTTTGTCTCCTGTTGCCAGGCTGGAGTGCAGTGGCGCAATCTCGGC  
TCACGGCAACCTCCGCCTCCCGG

>964

TTACGTAAGTGTGTGTGTGTGTAAACACACACACACTTTTTTTTTTTTTCTGAGACGGA  
GTTTGTCTCCTGTTGCCAGGCTGGAGTGCAGTGGCGCAATCTCGGCTCACGGCAACC

TCCGCCTCCCGGTTTCAAGTGAT

>965

TGTGTAAACACACACACTTTTTTTTTTTTTTCTGAGACGGAGTTTGTCTCCTGTTG  
CCCAGGCTGGAGTGCAGTGGCGCAATCTCGGCTCACGGCAACCTCCGCCTCCCGGTTT  
CAAGTGATTCTCCTGCCTCAGCC

>966

AGTTTTGTCTCCTGTTGCCCAGGCTGGAGTGCAGTGGCGCAATCTCGGCTCACGGCAAC  
CTCCGCCTCCCGGTTTCAAGTGATTCTCCTGCCTCAGCCTCCCGAGTAGCTGGGATTAC  
AGGCGGGTGCCACCGCGCCTGGC

>967

CTCCTGTTGCCCAGGCTGGAGTGCAGTGGCGCAATCTCGGCTCACGGCAACCTCCGCC  
TCCCGGTTTCAAGTGATTCTCCTGCCTCAGCCTCCCGAGTAGCTGGGATTACAGGCGG  
GTGCCACCGCGCCTGGCTAATTTT

>968

TGGCGCAATCTCGGCTCACGGCAACCTCCGCCTCCCGGTTTCAAGTGATTCTCCTGCCT  
CAGCCTCCCGAGTAGCTGGGATTACAGGCGGGTGCCACCGCGCCTGGCTAATTTTGTAT  
TTTTTGTAGAGACGGGGCTTCT

>969

GCAACCTCCGCCTCCCGGTTTCAAGTGATTCTCCTGCCTCAGCCTCCCGAGTAGCTGG  
GATTACAGGCGGGTGCCACCGCGCCTGGCTAATTTTGTATTTTTTGTAGAGACGGGGCT  
TCTCCATGTTGGTCAGGCTGGTC

>970

GTGATTCTCCTGCCTCAGCCTCCCGAGTAGCTGGGATTACAGGCGGGTGCCACCGCGC  
CTGGCTAATTTTGTATTTTTTGTAGAGACGGGGCTTCTCCATGTTGGTCAGGCTGGTCTC  
GAACTCCCGACCTCAGGTGATC

>971

CTGCCTCAGCCTCCCGAGTAGCTGGGATTACAGGCGGGTGCCACCGCGCCTGGCTAAT  
TTTTGTATTTTTTGTAGAGACGGGGCTTCTCCATGTTGGTCAGGCTGGTCTCGAACTCCC  
GACCTCAGGTGATCCGCCTGCCT

>972

GATTACAGGCGGGTGCCACCGCGCCTGGCTAATTTTGTATTTTTTGTAGAGACGGGGCT  
TCTCCATGTTGGTCAGGCTGGTCTCGAACTCCCGACCTCAGGTGATCCGCCTGCCTGG  
GCCTCCCAAAGTGCTGGGATTAG

>973

CGGGTGCCACCGCGCCTGGCTAATTTTGTATTTTTTGTAGAGACGGGGCTTCTCCATGT  
TGGTCAGGCTGGTCTCGAACTCCCGACCTCAGGTGATCCGCCTGCCTGGGCCTCCCAA  
AGTGCTGGGATTAGAGGCGTGAG

>974

AATTTTGTATTTTTTGTAGAGACGGGGCTTCTCCATGTTGGTCAGGCTGGTCTCGAACT  
CCCGACCTCAGGTGATCCGCCTGCCTGGGCCTCCCAAAGTGCTGGGATTAGAGGCGTG  
AGCCACCGCGCCCTACCCACAC

>975

CTTCTCCATGTTGGTCAGGCTGGTCTCGAACTCCCGACCTCAGGTGATCCGCCTGCCTG  
GGCCTCCCAAAGTGCTGGGATTAGAGGCGTGAGCCACCGCGCCCTACCCACACACTC

TTTCTGTCTGTCTCTGGCTGGTG

>976

GGCTGGTCTCGAACTCCCGACCTCAGGTGATCCGCCTGCCTGGGCCTCCCAAAGTGCT  
GGGATTAGAGGCGTGAGCCACCGCGCCCTACCCACACACTCTTTCTGTCTGTCTCTG  
GCTGGTGTACATACACACAGTTCA

>977

CTGCCTGGGCCTCCCAAAGTGCTGGGATTAGAGGCGTGAGCCACCGCGCCCTACCCCA  
CACACTCTTTCTGTCTGTCTCTGGCTGGTGTACATACACACAGTTCAGATTTTATATTAT  
ACATACAATAACTTTGAGGCTT

>978

AGTGCTGGGATTAGAGGCGTGAGCCACCGCGCCCTACCCACACACTCTTTCTGTCTG  
TCTCTGGCTGGTGTACATACACACAGTTCAGATTTTATATTATACATACAATAACTTTGA  
GGCTCCGTGGGTAGAAATGAC

>979

GAGGCGTGAGCCACCGCGCCCTACCCACACACTCTTTCTGTCTGTCTCTGGCTGGTG  
TACATACACACAGTTCAGATTTTATATTATACATACAATAACTTTGAGGCTTCCGTGGGT  
AGAAATGACCCAAGTTAGTGTG

>980

CTGTCTCTGGCTGGTGTACATACACACAGTTCAGATTTTATATTATACATACAATAACTTT  
GAGGCTTCCGTGGGTAGAAATGACCCAAGTTAGTGTGTGGGTTGTGTGTGTTTCCTGTT  
AGTACCTAGGGATGGGGACAG

>981

CTCTGGCTGGTGTACATACACACAGTTCAGATTTTATATTATACATACAATAACTTTGAG  
GCTTCCGTGGGTAGAAATGACCCAAGTTAGTGTGTGGGTTGTGTGTGTTTCCTGTTAGTA  
CCTAGGGATGGGGACAGGCCT

>982

ATACACACAGTTCAGATTTTATATTATACATACAATAACTTTGAGGCTTCCGTGGGTAGA  
AATGACCCAAGTTAGTGTGTGGGTTGTGTGTGTTTCCTGTTAGTACCTAGGGATGGGGAC  
AGGCCTTGGGTCTGCCAGTGC

>983

ACACAGTTCAGATTTTATATTATACATACAATAACTTTGAGGCTTCCGTGGGTAGAAATG  
ACCCAAGTTAGTGTGTGGGTTGTGTGTGTTTCCTGTTAGTACCTAGGGATGGGGACAGG  
CCTTGGGTCTGCCAGTGCTTTG

>984

ACATACAATAACTTTGAGGCTTCCGTGGGTAGAAATGACCCAAGTTAGTGTGTGGGTT  
GTGTGTGTTTCCTGTTAGTACCTAGGGATGGGGACAGGCCTTGGGTCTGCCAGTGCTTTG  
CAGCCCTGAGAACAGTAGAAGGC

>985

GAAATGACCCAAGTTAGTGTGTGGGTTGTGTGTGTTTCCTGTTAGTACCTAGGGATGGG  
GACAGGCCTTGGGTCTGCCAGTGCTTTGCAGCCCTGAGAACAGTAGAAGGCCAGAGG  
CCAAGGCTGATGGTGAGAGGATAGC

>986

CCAAGTTAGTGTGTGGGTTGTGTGTGTTTCCTGTTAGTACCTAGGGATGGGGACAGGCC  
TTGGGTCTGCCAGTGCTTTGCAGCCCTGAGAACAGTAGAAGGCCAGAGGCCAAGGCT



GATGGTGAGAGGATAGCCTTTGCGG

>987

TGTGTTCTGTAGTACCTAGGGATGGGGACAGGCCTTGGGTCTGCCAGTGCTTTGCA  
GCCCTGAGAACAGTAGAAGGCCAGAGGCCAAGGCTGATGGTGAGAGGATAGCCTTTG  
CGGAGGAGAGCCCAGTGTCCATAGA

>988

GGACAGGCCTTGGGTCTGCCAGTGCTTTGCAGCCCTGAGAACAGTAGAAGGCCAGAG  
GCCAAGGCTGATGGTGAGAGGATAGCCTTTGCGGAGGAGAGCCCAGTGTCCATAGATT  
TCTGTGGCCATGGCTACAGGCTCCT

>989

CCCTGAGAACAGTAGAAGGCCAGAGGCCAAGGCTGATGGTGAGAGGATAGCCTTTGC  
GGAGGAGAGCCCAGTGTCCATAGATTTCTGTGGCCATGGCTACAGGCTCCTGGCCTCC  
AATGAGTTTGACTCTGCTTCTGGGG

>990

AGGCCAGAGGCCAAGGCTGATGGTGAGAGGATAGCCTTTGCGGAGGAGAGCCCAGTG  
TCCATAGATTTCTGTGGCCATGGCTACAGGCTCCTGGCCTCCAATGAGTTTGACTCTGC  
TTCTGGGGCTCCTGTAGTGAGGCA

>991

CCTTTGCGGAGGAGAGCCCAGTGTCCATAGATTTCTGTGGCCATGGCTACAGGCTCCT  
GGCCTCCAATGAGTTTGACTCTGCTTCTGGGGCTCCTGTAGTGAGGCAGAGTTTGAA  
AACTGTTTAAAGATAAGGCTTGA

>992

CATAGATTTCTGTGGCCATGGCTACAGGCTCCTGGCCTCCAATGAGTTTGACTCTGCTT  
CTGGGGCTCCTGTAGTGAGGCAGAGTTTGGA AAAACTGTTTAAAGATAAGGCTTGACA  
TCCAGGGGGCTGGCGTGAAGCTG

>993

AGATTTCTGTGGCCATGGCTACAGGCTCCTGGCCTCCAATGAGTTTGACTCTGCTTCTG  
GGGCTCCTGTAGTGAGGCAGAGTTTGGA AAAACTGTTTAAAGATAAGGCTTGACATCC  
AGGGGGCTGGCGTGAAGCTGACA

>994

GGCCATGGCTACAGGCTCCTGGCCTCCAATGAGTTTGACTCTGCTTCTGGGGCTCCTGT  
AGTGAGGCAGAGTTTGGA AAAACTGTTTAAAGATAAGGCTTGACATCCAGGGGGCTG  
GCGTGAAGCTGACAAGGAAGGGG

>995

GGCTCCTGGCCTCCAATGAGTTTGACTCTGCTTCTGGGGCTCCTGTAGTGAGGCAGAG  
TTTGGA AAAACTGTTTAAAGATAAGGCTTGACATCCAGGGGGCTGGCGTGAAGCTGAC  
AAGGAAGGGGCTAAAGTCTTGCTA

>996

GGGGCTCCTGTAGTGAGGCAGAGTTTGGA AAAACTGTTTAAAGATAAGGCTTGACATC  
CAGGGGGCTGGCGTGAAGCTGACAAGGAAGGGGCTAAAGTCTTGCTAATTTTAAGTA  
AGTGCACTTCATCATAATGAATGTT

>997

GGAAAACTGTTTAAAGATAAGGCTTGACATCCAGGGGGCTGGCGTGAAGCTGACAA  
GGAAGGGGCTAAAGTCTTGCTAATTTTAAGTAAGTGCACTTCATCATAATGAATGTTGG

CCTTGCCTAGGGAGCCCCTACTCT

>998

GATAAGGCTTGACATCCAGGGGGCTGGCGTGAAGCTGACAAGGAAGGGGCTAAAGTC  
TTGCTAATTTTAAGTAAGTGCACTTCATCATAATGAATGTTGGCCTTGCCTAGGGAGCCC  
CTACTCTCAGACACAGAGAAAGC

>999

GGCGTGAAGCTGACAAGGAAGGGGCTAAAGTCTTGCTAATTTTAAGTAAGTGCACTTC  
ATCATAATGAATGTTGGCCTTGCCTAGGGAGCCCCTACTCTCAGACACAGAGAAAGCT  
GAGGACTTATAGGACTTCACTACA

>1000

CTCAGACACAGAGAAAGCTGAGGACTTATAGGACTTCACTACAATTTTCATTTCACTTC  
ATCTAACAGATGTCATAGAGTAGTGAATTAGGCATCTGCTGTGGCAGAACCTTCTTTTT  
ACTCTCAGCATCCCTGGCTTGA

>1001

CAGAGAAAGCTGAGGACTTATAGGACTTCACTACAATTTTCATTTCACTTCATCTAACA  
GATGTCATAGAGTAGTGAATTAGGCATCTGCTGTGGCAGAACCTTCTTTTTACTCTCAG  
CATCCCTGGCTTGAAAGGCAGA

>1002

AGGACTTCACTACAATTTTCATTTCACTTCATCTAACAGATGTCATAGAGTAGTGAATTA  
GGCATCTGCTGTGGCAGAACCTTCTTTTTACTCTCAGCATCCCTGGCTTGAAAGGCAGA  
TTTGTAGATTTCTAGGAAGCT

>1003

GTGAATTAGGCATCTGCTGTGGCAGAACCTTCTTTTTACTCTCAGCATCCCTGGCTTGA  
AAGGCAGATTTGTAGATTTCTAGGAAGCTACTTCAATTAAAATCTCTAAGATCCTCTTGC  
TAAGGGCTTGGCAACAGGGAG

>1004

AGGAAGCTACTTCAATTAAAATCTCTAAGATCCTCTTGCTAAGGGCTTGGCAACAGGG  
AGGAGGGGGCATGTTGTAGTGGTTGAATTCTTACTTTTAGGGACACTGATGAATTTGTC  
TTTTGTTCTCTCATCTCTTTTGC

>1005

AAGCTACTTCAATTAAAATCTCTAAGATCCTCTTGCTAAGGGCTTGGCAACAGGGAGG  
AGGGGGCATGTTGTAGTGGTTGAATTCTTACTTTTAGGGACACTGATGAATTTGTCTTTT  
GTTCTCTCATCTCTTTTGTTC

>1006

GCTTGGCAACAGGGAGGAGGGGGCATGTTGTAGTGGTTGAATTCTTACTTTTAGGGAC  
ACTGATGAATTTGTCTTTTGTCTCTCATCTCTTTTGTCTTCCCCCTCTTCTTTCTCCTA  
GCCTCCTCTATTGGCCCAGGA

>1007

AACAGGGAGGAGGGGGCATGTTGTAGTGGTTGAATTCTTACTTTTAGGGACACTGATG  
AATTTGTCTTTTGTCTCTCATCTCTTTTGTCTTCCCCCTCTTCTTTCTCCTAGCCTCCT  
CTATTGGCCCAGGAAGCCAC

>1008

GGAGCACCATGGATCTGACAAAAATGGGCATGATCCAGCTGCAGAACCCCTAGCCACCC  
CACGGGGCTACTGTGCAAGGCCAACAGATGCGGCTGGCCGGGACTTTGTGCGATGTG

GTCATCATGGTGGACAGCCAGGAG

>1009

AGCTGCAGAACCCTAGCCACCCACGGGGCTACTGTGCAAGGCCAACCAGATGCGGC  
TGGCCGGGACTTTGTGCGATGTGGTCATCATGGTGGACAGCCAGGAGTTCCACGCCCA  
CCGGACGGTGCTGGCCTGCACCAGC

>1010

GAACCCTAGCCACCCACGGGGCTACTGTGCAAGGCCAACCAGATGCGGCTGGCCGG  
GACTTTGTGCGATGTGGTCATCATGGTGGACAGCCAGGAGTTCCACGCCACCGGACG  
GTGCTGGCCTGCACCAGCAAGATGT

>1011

CCCCACGGGGCTACTGTGCAAGGCCAACCAGATGCGGCTGGCCGGGACTTTGTGCGAT  
GTGGTCATCATGGTGGACAGCCAGGAGTTCCACGCCACCGGACGGTGCTGGCCTGC  
ACCAGCAAGATGTTTGAGATCCTCT

>1012

GCGGCTGGCCGGGACTTTGTGCGATGTGGTCATCATGGTGGACAGCCAGGAGTTCCAC  
GCCACCGGACGGTGCTGGCCTGCACCAGCAAGATGTTTGAGATCCTCTTCCACCGCA  
ATAGTCAACACTATACTTTGGACT

>1013

ATGTGGTCATCATGGTGGACAGCCAGGAGTTCCACGCCACCGGACGGTGCTGGCCTG  
CACCAGCAAGATGTTTGAGATCCTCTTCCACCGCAATAGTCAACACTATACTTTGGACT  
TCCTCTCGCCAAAGACCTTCCAG

>1014

GAGTTCCACGCCCACCGGACGGTGCTGGCCTGCACCAGCAAGATGTTTGAGATCCTCT  
TCCACCGCAATAGTCAACACTATACTTTGGACTTCCTCTCGCCAAAGACCTTCCAGCAG  
ATTCTGGAGTATGCATATACAGC

>1015

TCTTCCACCGCAATAGTCAACACTATACTTTGGACTTCCTCTCGCCAAAGACCTTCCAG  
CAGATTCTGGAGTATGCATATACAGCCACGCTGCAAGCCAAGGCGGAGGACCTGGATG  
ACCTGCTGTATGCGGCCGAGATC

>1016

TCCAGCAGATTCTGGAGTATGCATATACAGCCACGCTGCAAGCCAAGGCGGAGGACCT  
GGATGACCTGCTGTATGCGGCCGAGATCCTGGAGATCGAGTACCTGGAGGAACAGTGC  
CTGAAGATGCTGGAGACCATCCAG

>1017

CAGCCACGCTGCAAGCCAAGGCGGAGGACCTGGATGACCTGCTGTATGCGGCCGAGA  
TCCTGGAGATCGAGTACCTGGAGGAACAGTGCCTGAAGATGCTGGAGACCATCCAGG  
CCTCAGACGACAATGACACGGAGGCC

>1018

CCAAGGCGGAGGACCTGGATGACCTGCTGTATGCGGCCGAGATCCTGGAGATCGAGTA  
CCTGGAGGAACAGTGCCTGAAGATGCTGGAGACCATCCAGGCCTCAGACGACAATGA  
CACGGAGGCCACCATGGCCGATGGC

>1019

GAGGAAGAAGAGGACCGCAAGGCTCGGTACCTCAAGAACATCTTCATCTCGAAGCAT  
TCCAGCGAGGAGAGTGGGTATGCCAGTGTGGCTGGACAGAGCCTCCCTGGGCCCATG

GTGGACCAGAGCCCTTCAGTCTCCAC

>1020

AAGAAGAGGACCGCAAGGCTCGGTACCTCAAGAACATCTTCATCTCGAAGCATTCCAG  
CGAGGAGAGTGGGTATGCCAGTGTGGCTGGACAGAGCCTCCCTGGGCCCATGGTGGA  
CCAGAGCCCTTCAGTCTCCACTTCA

>1021

CATCTCGAAGCATTCCAGCGAGGAGAGTGGGTATGCCAGTGTGGCTGGACAGAGCCTC  
CCTGGGCCCATGGTGGAACAGAGCCCTTCAGTCTCCACTTCATTTGGTCTTTCAGCCAT  
GAGTCCCACCAAGGCTGCAGTGG

>1022

CGAGGAGAGTGGGTATGCCAGTGTGGCTGGACAGAGCCTCCCTGGGCCCATGGTGGA  
CCAGAGCCCTTCAGTCTCCACTTCATTTGGTCTTTCAGCCATGAGTCCCACCAAGGCTG  
CAGTGGACAGTTTGATGACCATAG

>1023

GCCAGTGTGGCTGGACAGAGCCTCCCTGGGCCCATGGTGGAACAGAGCCCTTCAGTCT  
CCACTTCATTTGGTCTTTCAGCCATGAGTCCCACCAAGGCTGCAGTGGACAGTTTGATG  
ACCATAGGACAGTCTCTCCTGCA

>1024

CAGAGCCTCCCTGGGCCCATGGTGGAACAGAGCCCTTCAGTCTCCACTTCATTTGGTC  
TTTCAGCCATGAGTCCCACCAAGGCTGCAGTGGACAGTTTGATGACCATAGGACAGTC  
TCTCCTGCAGGGAACCTTTCAGCC

>1025

CATGGTGGACCAGAGCCCTTCAGTCTCCACTTCATTTGGTCTTTCAGCCATGAGTCCCA  
CCAAGGCTGCAGTGGACAGTTTGATGACCATAGGACAGTCTCTCCTGCAGGGAACCTC  
TCAGCCACCTGCAGGGCCCGAGG

>1026

ATAGGACAGTCTCTCCTGCAGGGAACCTTTCAGCCACCTGCAGGGCCCGAGGAGCCA  
ACTCTGGCTGGGGGTGGGCGGCACCCTGGGGTGGCTGAGGTGAAGACGGAGATGATG  
CAGGTGGATGAGGTGCCCAGCCAGGA

>1027

GCAGGGAACCTTTCAGCCACCTGCAGGGCCCGAGGAGCCAACTCTGGCTGGGGGTGG  
GCGGCACCCTGGGGTGGCTGAGGTGAAGACGGAGATGATGCAGGTGGATGAGGTGCC  
CAGCCAGGACAGCCCTGGGGCAGCCG

>1028

TCTTCAGCCACCTGCAGGGCCCGAGGAGCCAACTCTGGCTGGGGGTGGGCGGCACCC  
TGGGGTGGCTGAGGTGAAGACGGAGATGATGCAGGTGGATGAGGTGCCCAGCCAGGA  
CAGCCCTGGGGCAGCCGAGTCCAGCA

>1029

AACTCTGGCTGGGGGTGGGCGGCACCCTGGGGTGGCTGAGGTGAAGACGGAGATGAT  
GCAGGTGGATGAGGTGCCCAGCCAGGACAGCCCTGGGGCAGCCGAGTCCAGCATCTC  
AGGAGGGATGGGGGACAAGGTTGAGG

>1030

TGGCTGAGGTGAAGACGGAGATGATGCAGGTGGATGAGGTGCCCAGCCAGGACAGCC  
CTGGGGCAGCCGAGTCCAGCATCTCAGGAGGGATGGGGGACAAGGTTGAGGAAAGA

GGCAAAGAGGGGCCTGGGACCCCGACT

>1031

GGATGAGGTGCCCAGCCAGGACAGCCCTGGGGCAGCCGAGTCCAGCATCTCAGGAGG  
GATGGGGGACAAGGTTGAGGAAAGAGGCAAAGAGGGGCCTGGGACCCCGACTCGAA  
GCAGCGTCATCACCAGTGCTAGGGAGC

>1032

CTCAGGAGGGATGGGGGACAAGGTTGAGGAAAGAGGCAAAGAGGGGCCTGGGACCC  
CGACTCGAAGCAGCGTCATCACCAGTGCTAGGGAGCTACACTATGGGCGAGAGGAGA  
GTGCCGAGCAGGTGCCACCCCCAGCTG

>1033

ATGGGGGACAAGGTTGAGGAAAGAGGCAAAGAGGGGCCTGGGACCCCGACTCGAAG  
CAGCGTCATCACCAGTGCTAGGGAGCTACACTATGGGCGAGAGGAGAGTGCCGAGCA  
GGTGCCACCCCCAGCTGAGGCTGGCCA

>1034

GGGCCTGGGACCCCGACTCGAAGCAGCGTCATCACCAGTGCTAGGGAGCTACACTATG  
GGCGAGAGGAGAGTGCCGAGCAGGTGCCACCCCCAGCTGAGGCTGGCCAGGCCCCC  
ACTGGCCGACCTGAGCACCCAGCACC

>1035

CCCGACTCGAAGCAGCGTCATCACCAGTGCTAGGGAGCTACACTATGGGCGAGAGGA  
GAGTGCCGAGCAGGTGCCACCCCCAGCTGAGGCTGGCCAGGCCCCCCACTGGCCGACC  
TGAGCACCCAGCACCCCCGCCTGAGA

>1036

TGGCCAGGCCCCCACTGGCCGACCTGAGCACCCAGCACCCCCGCCTGAGAAGCATCT  
GGGCATCTACTCCGTGTTGCCCAACCACAAGGCTGACGCTGTATTGAGCATGCCGTCTT  
CCGTGACCTCTGGCCTCCACGTGC

>1037

GCCAGGCCCCCACTGGCCGACCTGAGCACCCAGCACCCCCGCCTGAGAAGCATCTGG  
GCATCTACTCCGTGTTGCCCAACCACAAGGCTGACGCTGTATTGAGCATGCCGTCTTCC  
GTGACCTCTGGCCTCCACGTGCAG

>1038

GCACCCAGCACCCCCGCCTGAGAAGCATCTGGGCATCTACTCCGTGTTGCCCAACCAC  
AAGGCTGACGCTGTATTGAGCATGCCGTCTTCCGTGACCTCTGGCCTCCACGTGCAGC  
CTGCCCTGGCTGTCTCCATGGACT

>1039

GAAGCATCTGGGCATCTACTCCGTGTTGCCCAACCACAAGGCTGACGCTGTATTGAGC  
ATGCCGTCTTCCGTGACCTCTGGCCTCCACGTGCAGCCTGCCCTGGCTGTCTCCATGGA  
CTTCAGCACCTATGGGGGGCTGC

>1040

CTCCGTGTTGCCCAACCACAAGGCTGACGCTGTATTGAGCATGCCGTCTTCCGTGACCT  
CTGGCCTCCACGTGCAGCCTGCCCTGGCTGTCTCCATGGACTTCAGCACCTATGGGGG  
GCTGCTGCCCCAGGGCTTCATCC

>1041

CAAGGCTGACGCTGTATTGAGCATGCCGTCTTCCGTGACCTCTGGCCTCCACGTGCAG  
CCTGCCCTGGCTGTCTCCATGGACTTCAGCACCTATGGGGGGCTGCTGCCCCAGGGCT

TCATCCAGAGGGAGCTGTTCAGCA

>1042

CCCTGGCTGTCTCCATGGACTTCAGCACCTATGGGGGGCTGCTGCCCCAGGGCTTCATC  
CAGAGGGAGCTGTTCAGCAAGCTGGGGGAGCTGGCTGTGGGCATGAAGTCAGAGAGC  
CGGACCATCGGAGAGCAGTGCAGC

>1043

CACCTATGGGGGGCTGCTGCCCCAGGGCTTCATCCAGAGGGAGCTGTTCAGCAAGCTG  
GGGGAGCTGGCTGTGGGCATGAAGTCAGAGAGCCGGACCATCGGAGAGCAGTGCAGC  
GTGTGTGGGGTCGAGCTTCCTGATA

>1044

GGCTGTGCCCCAGGGCTTCATCCAGAGGGAGCTGTTCAGCAAGCTGGGGGAGCTGG  
CTGTGGGCATGAAGTCAGAGAGCCGGACCATCGGAGAGCAGTGCAGCGTGTGTGGGG  
TCGAGCTTCCTGATAACGAGGCTGTG

>1045

GGGAGCTGTTCAGCAAGCTGGGGGAGCTGGCTGTGGGCATGAAGTCAGAGAGCCGGA  
CCATCGGAGAGCAGTGCAGCGTGTGTGGGGTCGAGCTTCCTGATAACGAGGCTGTGG  
AGCAGCACAGGTAGGCCCCGCTCCAG

>1046

GAAGTCAGAGAGCCGGACCATCGGAGAGCAGTGCAGCGTGTGTGGGGTCGAGCTTCC  
TGATAACGAGGCTGTGGAGCAGCACAGGTAGGCCCCGCTCCAGCCCCGCACCTGATGT  
AGGACTTGAGGCCCTCACACCCCTC

>1047

GGGGTCGAGCTTCCTGATAACGAGGCTGTGGAGCAGCACAGGTAGGCCCCGCTCCAG  
CCCCGCACCTGATGTAGGACTTGAGGCCCTCACACCCCTCCTTCACACCCTGGCTGCT  
CCCAAGTTAGGGGCCTGGCTCCCCT

>1048

GCTCCAGCCCCGCACCTGATGTAGGACTTGAGGCCCTCACACCCCTCCTTCACACCCT  
GGCTGTCCCAAGTTAGGGGCCTGGCTCCCCTGTCTTGGAATTTGTGAAAAAACCAG  
AACACTTCTTCTAAAGTTCTGGCG

>1049

GTAGGACTTGAGGCCCTCACACCCCTCCTTCACACCCTGGCTGCTCCCAAGTTAGGGG  
CCTGGCTCCCCTGTCTTGGAATTTGTGAAAAAACCAGAACACTTCTTCTAAAGTTCTG  
GCGGGGAGGGGAGCAGGTTTTTT

>1050

CCCTCACACCCCTCCTTCACACCCTGGCTGCTCCCAAGTTAGGGGCCTGGCTCCCCTGT  
CTTGGAATTTGTGAAAAAACCAGAACACTTCTTCTAAAGTTCTGGCGGGGAGGGGA  
GCAGGTTTTTTAAAGTGTAGTGAG

>1051

TGCTCCCAAGTTAGGGGCCTGGCTCCCCTGTCTTGGAATTTGTGAAAAAACCAGAAC  
ACTTCTTCTAAAGTTCTGGCGGGGAGGGGAGCAGGTTTTTTAAAGTGTAGTGAGGGGG  
CCTAGGATCTTTCCAAAAAGCACC

>1052

CTCCCCTGTCTTGGAATTTGTGAAAAAACCAGAACACTTCTTCTAAAGTTCTGGCGG  
GGAGGGGAGCAGGTTTTTTAAAGTGTAGTGAGGGGGCCTAGGATCTTTCCAAAAAGC

ACCAGGGGACACTCATGGGCGCAGC

>1053

TTGGCAATTTGTGAAAAACCAGAACACTTCTTCTAAAGTTCTGGCGGGGAGGGGAG  
CAGGTTTTTTTAAAGTGTAGTGAGGGGGCCTAGGATCTTTCCAAAAAGCACCAGGGGAC  
ACTCATGGGCGCAGCTTCTTAATAG

>1054

GGCCTAGGATCTTTCCAAAAAGCACCAGGGGACACTCATGGGCGCAGCTTCTTAATAG  
GCCCTTCCCTTTGTTTTTTTGCTTTTGGGCCCTGTTTGTTTTTTCTGCTGTTTGGTCTGTT  
CTCCTTTGCTTGGAGTGACTG

>1055

GCACCAGGGGACACTCATGGGCGCAGCTTCTTAATAGGCCCTTCCCTTTGTTTTTTTGCT  
TTTGGGCCCTGTTTGTTTTTTTCTGCTGTTTGGTCTGTTCTCCTTTGCTTGGAGTGACTG  
ATAAAATGGAGAGAAGGAGAA

>1056

CAGGGGACACTCATGGGCGCAGCTTCTTAATAGGCCCTTCCCTTTGTTTTTTTGCTTTTG  
GGCCCTGTTTGTTTTTTTCTGCTGTTTGGTCTGTTCTCCTTTGCTTGGAGTGACTGATAA  
AATGGAGAGAAGGAGAAAAGG

>1057

ATGGGCGCAGCTTCTTAATAGGCCCTTCCCTTTGTTTTTTTGCTTTTGGGCCCTGTTTGT  
TTTTTCTGCTGTTTGGTCTGTTCTCCTTTGCTTGGAGTGACTGATAAAATGGAGAGAAG  
GAGAAAAGGAGTGGGATGAGG

>1058

TTTTTCTGCTGTTTGGTCTGTTCTCCTTTGCTTGGAGTGACTGATAAAATGGAGAGAA  
GGAGAAAAGGAGTGGGATGAGGGTCTCTTGGGCCCTGCATCTGACCATGTTACTAGGT  
TTCAGGTCCTCGGGTTCCTCATGC

>1059

GTTTGGTCTGTTCTCCTTTGCTTGGAGTGACTGATAAAATGGAGAGAAGGAGAAAAGG  
AGTGGGATGAGGGTCTCTTGGGCCCTGCATCTGACCATGTTACTAGGTTTCAGGTCCTC  
GGGTTCCCATGCAGTGGTCCCTG

>1060

GTGACTGATAAAATGGAGAGAAGGAGAAAAGGAGTGGGATGAGGGTCTCTTGGGCCC  
TGCATCTGACCATGTTACTAGGTTTCAGGTCCTCGGGTTCCTCATGCAGTGGTCCCTGTG  
AAGACAGCCTGTCCCTTTCTGCAG

>1061

TAAAATGGAGAGAAGGAGAAAAGGAGTGGGATGAGGGTCTCTTGGGCCCTGCATCTG  
ACCATGTTACTAGGTTTCAGGTCCTCGGGTTCCTCATGCAGTGGTCCCTGTGAAGACAG  
CCTGTCCCTTTCTGCAGCTTGGGAG

>1062

GAGAGAAGGAGAAAAGGAGTGGGATGAGGGTCTCTTGGGCCCTGCATCTGACCATGT  
TACTAGGTTTCAGGTCCTCGGGTTCCTCATGCAGTGGTCCCTGTGAAGACAGCCTGTCC  
CTTCTGCAGCTTGGGAGAATGGGA

>1063

TGGGATGAGGGTCTCTTGGGCCCTGCATCTGACCATGTTACTAGGTTTCAGGTCCTCGG  
GTTCCCATGCAGTGGTCCCTGTGAAGACAGCCTGTCCCTTTCTGCAGCTTGGGAGAAT

GGGAGGGTCTGGGGGCTGCTTAA

>1064

CCTCGGGTTCCCATGCAGTGGTCCCTGTGAAGACAGCCTGTCCCTTTCTGCAGCTTGG  
GAGAATGGGAGGGTCTGGGGGCTGCTTAAGCCACAAGAGCAGCTGCAGGTTCTGAAC  
CTTATTCCTGGTGAAAGTTAATCTC

>1065

CCTGTCCCTTTCTGCAGCTTGGGAGAATGGGAGGGTCTGGGGGCTGCTTAAGCCACAA  
GAGCAGCTGCAGGTTCTGAACCTTATTCCTGGTGAAAGTTAATCTCCTTGCTCTGTCTC  
CCTTCTCATTCTCTGATCCTGCA

>1066

TGGGAGAATGGGAGGGTCTGGGGGCTGCTTAAGCCACAAGAGCAGCTGCAGGTTCTG  
AACCTTATTCCTGGTGAAAGTTAATCTCCTTGCTCTGTCTCCCTTCTCATTCTCTGATCC  
TGCACATGCATTTAGGGGGAATT

>1067

GCTGCTTAAGCCACAAGAGCAGCTGCAGGTTCTGAACCTTATTCCTGGTGAAAGTTAA  
TCTCCTTGCTCTGTCTCCCTTCTCATTCTCTGATCCTGCACATGCATTTAGGGGGAATTG  
ATTAAATGCAAGGGGAAAGGA

>1068

TCCCTTCTCATTCTCTGATCCTGCACATGCATTTAGGGGGAATTGATTTAAATGCAAGGG  
GAAAGGATGGGTATAAGAGTCTTGGTCTTGCAGCCTGTGAAGTCTCATTCTTATCCCAT  
CTCTGCTCACACTGAACTAAA

>1069

CATTCTCTGATCCTGCACATGCATTTAGGGGGAATTGATTTAAATGCAAGGGGAAAGGA  
TGGGTATAAGAGTCTTGGTCTTGCAGCCTGTGAAGTCTCATTCTTATCCCATCTCTGCTC  
ACACTGAACTAAATGCCGCTT

>1070

CTGATCCTGCACATGCATTTAGGGGGAATTGATTTAAATGCAAGGGGAAAGGATGGGT  
TAAGAGTCTTGGTCTTGCAGCCTGTGAAGTCTCATTCTTATCCCATCTCTGCTCACACT  
GAACTAAATGCCGCTTCAGGCT

>1071

ATGCATTTAGGGGGAATTGATTTAAATGCAAGGGGAAAGGATGGGTATAAGAGTCTTG  
GTCTTGCAGCCTGTGAAGTCTCATTCTTATCCCATCTCTGCTCACACTGAACTAAATGC  
CGCTTCAGGCTAGCATTGGCTTC

>1072

TCTTATCCCATCTCTGCTCACACTGAACTAAATGCCGCTTCAGGCTAGCATTGGCTTCCC  
TCCGGCTTCCGTTTCCTTCTCTATGAAATAACCATTCATTGAGCTCTTATGACATGTTTG  
GTTCAGTACTAAGCACTTTC

>1073

TAGCATTGGCTTCCCTCCGGCTTCCGTTTCCTTCTCTATGAAATAACCATTCATTGAGCT  
CTTATGACATGTTTGGTTCAGTACTAAGCACTTTCATGAGTTGCATTTTCATTACAACA  
GCCCTTTGAGATAGGTAATG

>1074

TTGGCTTCCCTCCGGCTTCCGTTTCCTTCTCTATGAAATAACCATTCATTGAGCTCTTAT  
GACATGTTTGGTTCAGTACTAAGCACTTTCATGAGTTGCATTTTCATTACAACAGCCCT



TTGAGATAGGTAATGTCCTT

>1075

CTTCTCTATGAAATAACCATTCATTGAGCTCTTATGACATGTTTGGTTCAGTACTAAGCA  
CTTTCCATGAGTTGCATTTTCATTACAACAGCCCTTTGAGATAGGTAATGTCCTTCTTTT  
TTTTTTGGATGTGAAGTTTC

>1076

TGACATGTTTGGTTCAGTACTAAGCACTTTCCATGAGTTGCATTTTCATTACAACAGCCC  
TTTGAGATAGGTAATGTCCTTCTTTTTTTTTTTGGATGTGAAGTTTCGCTCTCCTTGCCCA  
GGCTGGAGTGCAATGGTGTG

>1077

TGTTTGGTTCAGTACTAAGCACTTTCCATGAGTTGCATTTTCATTACAACAGCCCTTTGA  
GATAGGTAATGTCCTTCTTTTTTTTTTTGGATGTGAAGTTTCGCTCTCCTTGCCCAGGCTG  
GAGTGCAATGGTGTGATCTC

>1078

CTTTCCATGAGTTGCATTTTCATTACAACAGCCCTTTGAGATAGGTAATGTCCTTCTTTT  
TTTTTTGGATGTGAAGTTTCGCTCTCCTTGCCCAGGCTGGAGTGCAATGGTGTGATCTC  
TGCTCACCGCAACCTCTGCAT

>1079

CATGAGTTGCATTTTCATTACAACAGCCCTTTGAGATAGGTAATGTCCTTCTTTTTTTTTT  
GGATGTGAAGTTTCGCTCTCCTTGCCCAGGCTGGAGTGCAATGGTGTGATCTCTGCTCA  
CCGCAACCTCTGCATCCCGG

>1080

CCCTTTGAGATAGGTAATGTCCTTCTTTTTTTTTTTGGATGTGAAGTTTCGCTCTCCTTGC  
CCAGGCTGGAGTGCAATGGTGTGATCTCTGCTCACCGCAACCTCTGCATCCCGGGTTA  
AGGTGATTCTCCTGCCTCAGCC

>1081

GTTTCGCTCTCCTTGCCCAGGCTGGAGTGCAATGGTGTGATCTCTGCTCACCGCAACCT  
CTGCATCCCGGGTTAAGGTGATTCTCCTGCCTCAGCCTCCCGAGTAGCTCGGATTACAG  
GCACGCACCACCATACTGGCT

>1082

CTCTCCTTGCCCAGGCTGGAGTGCAATGGTGTGATCTCTGCTCACCGCAACCTCTGCAT  
CCCGGGTTAAGGTGATTCTCCTGCCTCAGCCTCCCGAGTAGCTCGGATTACAGGCACG  
CACCACCATACTGGCTAATTTT

>1083

TGGTGTGATCTCTGCTCACCGCAACCTCTGCATCCCGGGTTAAGGTGATTCTCCTGCCT  
CAGCCTCCCGAGTAGCTCGGATTACAGGCACGCACCACCATACTGGCTAATTTTGAAT  
TTTAGTAGAGACGGGCTTTCA

>1084

CTGCCTCAGCCTCCCGAGTAGCTCGGATTACAGGCACGCACCACCATACTGGCTAATT  
TTGAATTTTAGTAGAGACGGGCTTTCACCGTGTTGGTCAGGATGGTCTCGAACTCCCG  
ACCTCAGGTGATCGGCCTGCTT

>1085

AGCTCGGATTACAGGCACGCACCACCATACTGGCTAATTTTGAATTTTAGTAGAGAC  
GGGCTTTCACCGTGTTGGTCAGGATGGTCTCGAACTCCCGACCTCAGGTGATCGGCCT

GCTTCGGCCTCCCAAAGTGCTGG

>1086

CTCGGATTACAGGCACGCACCACCATACCTGGCTAATTTTGAATTTTATAGTAGAGACGG  
GCTTTCACCGTGTTGGTCAGGATGGTCTCGAACTCCCGACCTCAGGTGATCGGCCTGC  
TTCGGCCTCCCAAAGTGCTGGAT

>1087

GATTACAGGCACGCACCACCATACCTGGCTAATTTTGAATTTTATAGTAGAGACGGGCTT  
TCACCGTGTTGGTCAGGATGGTCTCGAACTCCCGACCTCAGGTGATCGGCCTGCTTCG  
GCCTCCCAAAGTGCTGGATTACA

>1088

CACGCACCACCATACCTGGCTAATTTTGAATTTTATAGTAGAGACGGGCTTTCACCGTGT  
TGGTCAGGATGGTCTCGAACTCCCGACCTCAGGTGATCGGCCTGCTTCGGCCTCCCAA  
AGTGCTGGATTACAGGTATGAGC

>1089

AATTTTGAATTTTATAGTAGAGACGGGCTTTCACCGTGTTGGTCAGGATGGTCTCGAACT  
CCCGACCTCAGGTGATCGGCCTGCTTCGGCCTCCCAAAGTGCTGGATTACAGGTATGA  
GCCACCGTGTCAGCTGGTAATG

>1090

TTTCACCGTGTTGGTCAGGATGGTCTCGAACTCCCGACCTCAGGTGATCGGCCTGCTTC  
GGCCTCCCAAAGTGCTGGATTACAGGTATGAGCCACCGTGTCAGCTGGTAATGTCCTT  
CTTTTACATGGAACAATACTAA

>1091

TCAGGATGGTCTCGAACTCCCGACCTCAGGTGATCGGCCTGCTTCGGCCTCCCAAAGT  
GCTGGATTACAGGTATGAGCCACCGTGTCAGCTGGTAATGTCCTTCTTTTACATGGAA  
CAATACTAAGGCTCAGATGTCAA

>1092

CGAACTCCCGACCTCAGGTGATCGGCCTGCTTCGGCCTCCCAAAGTGCTGGATTACAG  
GTATGAGCCACCGTGTCAGCTGGTAATGTCCTTCTTTTACATGGAACAATACTAAGGC  
TCAGATGTCAAGTCTCTTTTCTA

>1093

TACAGGTATGAGCCACCGTGTCAGCTGGTAATGTCCTTCTTTTACATGGAACAATACT  
AAGGCTCAGATGTCAAGTCTCTTTTCTAGGGTCACATAGATAGTAAGAGGCAGAGCTG  
GATTCAAATTTAGGTCCTTACCC

>1094

GTATGAGCCACCGTGTCAGCTGGTAATGTCCTTCTTTTACATGGAACAATACTAAGGC  
TCAGATGTCAAGTCTCTTTTCTAGGGTCACATAGATAGTAAGAGGCAGAGCTGGATTCA  
AATTTAGGTCCTTACCCCCTGG

>1095

ATGTCCTTCTTTTACATGGAACAATACTAAGGCTCAGATGTCAAGTCTCTTTTCTAGGGT  
CACATAGATAGTAAGAGGCAGAGCTGGATTCAAATTTAGGTCCTTACCCCCTGGTACTT  
TGCTGCCTCTTGGAGTCACTT

>1096

AGGCTCAGATGTCAAGTCTCTTTTCTAGGGTCACATAGATAGTAAGAGGCAGAGCTGG  
ATTCAAATTTAGGTCCTTACCCCCTGGTACTTTGCTGCCTCTTGGAGTCACTTAGACTTG

AAGAGGATCATGTCTATGGAAC

>1097

AGTCTCTTTTCTAGGGTCACATAGATAGTAAGAGGCAGAGCTGGATTCAAATTTAGGTC  
CTTACCCCCTGGTACTTTGCTGCCTCTTGGAGTCACTTAGACTTGAAGAGGATCATGTC  
TATGGAACAGAGCGTTTTGAAG

>1098

TTCAAATTTAGGTCCTTACCCCCTGGTACTTTGCTGCCTCTTGGAGTCACTTAGACTTG  
AAGAGGATCATGTCTATGGAACAGAGCGTTTTGAAGATTGCTTATAGGAAGTGGAGTA  
AATAACAGGGGGGATAAGTAGCG

>1099

TACCCCCTGGTACTTTGCTGCCTCTTGGAGTCACTTAGACTTGAAGAGGATCATGTCTA  
TGGAACAGAGCGTTTTGAAGATTGCTTATAGGAAGTGGAGTAAATAACAGGGGGGATA  
AGTAGCGAGTTTGTTTTTTTTT

>1100

CTTGGAGTCACTTAGACTTGAAGAGGATCATGTCTATGGAACAGAGCGTTTTGAAGAT  
TGCTTATAGGAAGTGGAGTAAATAACAGGGGGGATAAGTAGCGAGTTTGTTTTTTTTT  
CCTTGCTTCTGTCATAAACCACG

>1101

AGTCACTTAGACTTGAAGAGGATCATGTCTATGGAACAGAGCGTTTTGAAGATTGCTTA  
TAGGAAGTGGAGTAAATAACAGGGGGGATAAGTAGCGAGTTTGTTTTTTTTTTCCTTGC  
TTCTGTCATAAACCACGTGCCC

>1102

GATCATGTCTATGGAACAGAGCGTTTTGAAGATTGCTTATAGGAAGTGGAGTAAATAAC  
AGGGGGGATAAGTAGCGAGTTTGTTTTTTTTTTCCTTGCTTCTGTCATAAACCACGTGC  
CCATCATTTTATCCTCTAGTTT

>1103

AGTGGAGTAAATAACAGGGGGGATAAGTAGCGAGTTTGTTTTTTTTTTCCTTGCTTCTG  
TCATAAACCACGTGCCCATCATTTTATCCTCTAGTTTCTGGGTCAGATGAATGGAGTCAA  
GAAATCCAGCTTTCTGTTGTC

>1104

ATAAGTAGCGAGTTTGTTTTTTTTTTCCTTGCTTCTGTCATAAACCACGTGCCCATCATT  
TTATCCTCTAGTTTCTGGGTCAGATGAATGGAGTCAAGAAATCCAGCTTTCTGTTGTCA  
TTGACGACAGCATTTGGCTGC

>1105

TTTTCTTGCTTCTGTCATAAACCACGTGCCCATCATTTTATCCTCTAGTTTCTGGGTCA  
GATGAATGGAGTCAAGAAATCCAGCTTTCTGTTGTCATTGACGACAGCATTTGGCTGCA  
TACCCTGTGGTCTGCTGTTTT

>1106

AACCACGTGCCCATCATTTTATCCTCTAGTTTCTGGGTCAGATGAATGGAGTCAAGAAA  
TCCAGCTTTCTGTTGTCAATTGACGACAGCATTTGGCTGCATACCCTGTGGTCTGCTGTTT  
TGCTGATCTTGGGTGGATTCT

>1107

CACGTGCCCATCATTTTATCCTCTAGTTTCTGGGTCAGATGAATGGAGTCAAGAAATCC  
AGCTTTCTGTTGTCATTGACGACAGCATTTGGCTGCATACCCTGTGGTCTGCTGTTTTG

CTGATCTTGGGTGGATTCTCCA

>1108

GGTCAGATGAATGGAGTCAAGAAATCCAGCTTTCTGTTGTCATTGACGACAGCATTTG  
GCTGCATACCCTGTGGTCTGCTGTTTTGCTGATCTTGGGTGGATTCTCCACTTCCTCCCC  
CTTCACCCCCATTCCCCTGTTG

>1109

ATGGAGTCAAGAAATCCAGCTTTCTGTTGTCATTGACGACAGCATTTGGCTGCATACCC  
TGTGGTCTGCTGTTTTGCTGATCTTGGGTGGATTCTCCACTTCCTCCCCCTTCACCCCCA  
TTCCCCTGTTGCTCGTTCAGG

>1110

CAGCTTTCTGTTGTCATTGACGACAGCATTTGGCTGCATACCCTGTGGTCTGCTGTTTT  
GCTGATCTTGGGTGGATTCTCCACTTCCTCCCCCTTCACCCCCATTCCCCTGTTGCTCGT  
TCAGGTACGGGGGATGTGAGT

>1111

CCCTGTGGTCTGCTGTTTTGCTGATCTTGGGTGGATTCTCCACTTCCTCCCCCTTCACCC  
CCATTCCCCTGTTGCTCGTTCAGGTACGGGGGATGTGAGTGAGAGGGGTGGGGTGGG  
GATATCTGGAAGTTGATCTCAT

>1112

GTCTGCTGTTTTGCTGATCTTGGGTGGATTCTCCACTTCCTCCCCCTTCACCCCCATTCC  
CCTGTTGCTCGTTCAGGTACGGGGGATGTGAGTGAGAGGGGTGGGGTGGGGATATCT  
GGAAGTTGATCTCATCACCCCT

>1113

TGTTTTGCTGATCTTGGGTGGATTCTCCACTTCCTCCCCCTTCACCCCCATTCCCCTGTT  
GCTCGTTCAGGTACGGGGGATGTGAGTGAGAGGGGTGGGGTGGGGATATCTGGAAG  
TTGATCTCATCACCCCTAGCCGG

>1114

TCTTGGGTGGATTCTCCACTTCCTCCCCCTTCACCCCCATTCCCCTGTTGCTCGTTCAGG  
TACGGGGGATGTGAGTGAGAGGGGTGGGGTGGGGATATCTGGAAGTTGATCTCATCA  
CCCCTAGCCGGAATCTGCTCTG

>1115

TTCTCCCCCTTCACCCCCATTCCCCTGTTGCTCGTTCAGGTACGGGGGATGTGAGTGA  
GAGGGGTGGGGTGGGGATATCTGGAAGTTGATCTCATCACCCCTAGCCGGAATCTGC  
TCTGACCCTGCCTCCTCGACAGC

>1116

AGTTGATCTCATCACCCCTAGCCGGAATCTGCTCTGACCCTGCCTCCTCGACAGCTCAG  
AGGCTTAACTTGTGGAAAGTGTGGCAGAGCTAAACGTAGCCGACTTTTTCCAGTGGGT  
GCGAAAAATAACCGCCACTAAGG

>1117

CTCATCACCCCTAGCCGGAATCTGCTCTGACCCTGCCTCCTCGACAGCTCAGAGGCTTA  
ACTTGTGGAAAGTGTGGCAGAGCTAAACGTAGCCGACTTTTTCCAGTGGGTGCGAAA  
AATAACCGCCACTAAGGTGTGTCT

>1118

GAATCTGCTCTGACCCTGCCTCCTCGACAGCTCAGAGGCTTAACTTGTGGAAAGTGTG  
GCAGAGCTAAACGTAGCCGACTTTTTCCAGTGGGTGCGAAAAATAACCGCCACTAAGG

TGTGTCTTCTTGATGCTTGTACCG

>1119

CCTCGACAGCTCAGAGGCTTAACCTGTGGAAAGTGTGGCAGAGCTAAACGTAGCCGA  
CTTTTTCCAGTGGGTGCGAAAAATAACCGCCACTAAGGTGTGTCTTCTTGATGCTTGT  
CCGCTCAGAAATAGACTGAGGTTA

>1120

TGTGGAAAGTGTGGCAGAGCTAAACGTAGCCGACTTTTTCCAGTGGGTGCGAAAAATA  
ACCGCCACTAAGGTGTGTCTTCTTGATGCTTGTACCGCTCAGAAATAGACTGAGGTTAT  
GTTTGTTTTTGCTCAAACCTTCC

>1121

TGGAAAGTGTGGCAGAGCTAAACGTAGCCGACTTTTTCCAGTGGGTGCGAAAAATAAC  
CGCCACTAAGGTGTGTCTTCTTGATGCTTGTACCGCTCAGAAATAGACTGAGGTTATGT  
TTGTTTTTGCTCAAACCTTCCTA

>1122

CTAAACGTAGCCGACTTTTTCCAGTGGGTGCGAAAAATAACCGCCACTAAGGTGTGTC  
TTCTTGATGCTTGTACCGCTCAGAAATAGACTGAGGTTATGTTTGTTTTTGCTCAAACCT  
TCCTAAAGAGGAAACCCGCTCC

>1123

TGCGAAAAATAACCGCCACTAAGGTGTGTCTTCTTGATGCTTGTACCGCTCAGAAATAG  
ACTGAGGTTATGTTTGTTTTTGCTCAAACCTTCCTAAAGAGGAAACCCGCTCCCCAAA  
GTTGACCAGATAGATGTATCATC

>1124

AAAAATAACCGCCACTAAGGTGTGTCTTCTTGATGCTTGTACCGCTCAGAAATAGACTG  
AGGTTATGTTTGTTTTTGCTCAAACCTTCCTAAAGAGGAAACCCGCTCCCCAAAGTTGA  
CCAGATAGATGTATCATCTTTC

>1125

GCTCAGAAATAGACTGAGGTTATGTTTGTTTTTGCTCAAACCTTCCTAAAGAGGAAACC  
CGCTCCCCAAAGTTGACCAGATAGATGTATCATCTTCCGGATGTGAATTATTTTCGGCTG  
TGTGCTATGAGAACTGGGTAT

>1126

GAGGTTATGTTTGTTTTTGCTCAAACCTTCCTAAAGAGGAAACCCGCTCCCCAAAGTTG  
ACCAGATAGATGTATCATCTTCCGGATGTGAATTATTTTCGGCTGTGTGCTATGAGAACT  
GGGTATGGTGGGAAGTAATTG

>1127

TGCTCAAACCTTCCTAAAGAGGAAACCCGCTCCCCAAAGTTGACCAGATAGATGTATC  
ATCTTCCGGATGTGAATTATTTTCGGCTGTGTGCTATGAGAACTGGGTATGGTGGGAAG  
TAATTGTTTTTCTGGCTCTCATC

>1128

AAGAGGAAACCCGCTCCCCAAAGTTGACCAGATAGATGTATCATCTTCCGGATGTGA  
ATTATTTTCGGCTGTGTGCTATGAGAACTGGGTATGGTGGGAAGTAATTGTTTTCTGGCT  
CTCATCAGGTCCTGGTTCCTGG

>1129

GATAGATGTATCATCTTCCGGATGTGAATTATTTTCGGCTGTGTGCTATGAGAACTGGGT  
ATGGTGGGAAGTAATTGTTTTCTGGCTCTCATCAGGTCCTGGTTCCTGGTTGCTTTTCT

TTACCCGAGAGGGCCACAAA

>1130

TGTATCATCTTTCCGGATGTGAATTATTTTCGGCTGTGTGCTATGAGAACTGGGTATGGTG  
GGAAGTAATTGTTTTCTGGCTCTCATCAGGTCCTGGTTCCTGGTTGCTTTTCTTTACCC  
GAGAGGGCCACAAAAGATAC

>1131

GAATTATTTTCGGCTGTGTGCTATGAGAACTGGGTATGGTGGGAAGTAATTGTTTTTCTG  
GCTCTCATCAGGTCCTGGTTCCTGGTTGCTTTTCTTTACCCGAGAGGGCCACAAAAGAT  
ACCACTCTCCTGAGACTTCCAA

>1132

GTCCTGGTTCCTGGTTGCTTTTCTTTACCCGAGAGGGCCACAAAAGATACCACTCTCCT  
GAGACTTCCAAGTTCCCCTTCAGCAAGACCCTCATTCCTCTGGGGAGAGAGGGAGAG  
TTGGCCATGTTATATTCGAAAGAG

>1133

GATACCACTCTCCTGAGACTTCCAAGTTCCCCTTCAGCAAGACCCTCATTCCTCTGGGG  
AGAGAGGGAGAGTTGGCCATGTTATATTCGAAAGAGCCTGGGTATTGGAATTGGCCATA  
TTTAGTGGTGAGAGCCTGTGAT

>1134

CTCCTGAGACTTCCAAGTTCCCCTTCAGCAAGACCCTCATTCCTCTGGGGAGAGAGGG  
AGAGTTGGCCATGTTATATTCGAAAGAGCCTGGGTATTGGAATTGGCCATATTTAGTGGT  
GAGAGCCTGTGATACTTATTTA

>1135

TCTGGGGAGAGAGGGAGAGTTGGCCATGTTATATTCGAAAGAGCCTGGGTATTGGAAT  
TGGCCATATTTAGTGGTGAGAGCCTGTGATACTTATTTAACCTTTCTGGGCCTTGTTTCA  
CTCACTACATTTTTTTTTTTTTT

>1136

GGGGAGAGAGGGAGAGTTGGCCATGTTATATTCGAAAGAGCCTGGGTATTGGAATTGG  
CCATATTTAGTGGTGAGAGCCTGTGATACTTATTTAACCTTTCTGGGCCTTGTTTCACTC  
ACTACATTTTTTTTTTTTTTTTTT

>1137

GCCTGGGTATTGGAATTGGCCATATTTAGTGGTGAGAGCCTGTGATACTTATTTAACCTT  
TCTGGGCCTTGTTTCACTCACTACATTTTTTTTTTTTTTTTTTTTGGAGACGGAGTCTCG  
CTCTGTCACCGGGCTGGAGT

>1138

ATACTTATTTAACCTTTCTGGGCCTTGTTTCACTCACTACATTTTTTTTTTTTTTTTTTTT  
GAGACGGAGTCTCGCTCTGTCACCGGGCTGGAGTGCAATGGCGTGATCTCAGCTCACT  
GCAGTCTCCACCTCCCGGGT

>1139

AACCTTTCTGGGCCTTGTTTCACTCACTACATTTTTTTTTTTTTTTTTTTTGGAGACGGA  
GTCTCGCTCTGTCACCGGGCTGGAGTGCAATGGCGTGATCTCAGCTCACTGCAGTCTC  
CACCTCCCGGGTTCAAGCGATT

>1140

TTGTTTCACTCACTACATTTTTTTTTTTTTTTTTTTTGGAGACGGAGTCTCGCTCTGTCAC  
CGGGCTGGAGTGCAATGGCGTGATCTCAGCTCACTGCAGTCTCCACCTCCCGGGTTCA

AGCGATTCTCCTGCCTCAGCC

>1141

CACTACATTTTTTTTTTTTTTTTTTTTTTTGAGACGGAGTCTCGCTCTGTCACCGGGCTGGA  
GTGCAATGGCGTGATCTCAGCTCACTGCAGTCTCCACCTCCCGGGTTCAAGCGATTCTC  
CTGCCTCAGCCTCCTGAGTAG

>1142

TTTTTTTTTTGAGACGGAGTCTCGCTCTGTCACCGGGCTGGAGTGCAATGGCGTGATCTC  
AGCTCACTGCAGTCTCCACCTCCCGGGTTCAAGCGATTCTCCTGCCTCAGCCTCCTGA  
GTAGCTGGGACTACAGGCACCTG

>1143

TGGCGTGATCTCAGCTCACTGCAGTCTCCACCTCCCGGGTTCAAGCGATTCTCCTGCCT  
CAGCCTCCTGAGTAGCTGGGACTACAGGCACCTGTCACCCCGCCCAGCTAATTTTTTGT  
ATTTTATAGTAGAGACAGGGTTT

>1144

AGTCTCCACCTCCCGGGTTCAAGCGATTCTCCTGCCTCAGCCTCCTGAGTAGCTGGGA  
CTACAGGCACCTGTCACCCCGCCCAGCTAATTTTTTGTATTTTATAGTAGAGACAGGGTT  
TCACCATGTTGGCCAGAATGGTC

>1145

GATTCTCCTGCCTCAGCCTCCTGAGTAGCTGGGACTACAGGCACCTGTCACCCCGCCC  
AGCTAATTTTTTGTATTTTATAGTAGAGACAGGGTTTCACCATGTTGGCCAGAATGGTCTC  
GATCTCTTGACCTTGCGATCCA

>1146

GCCTCAGCCTCCTGAGTAGCTGGGACTACAGGCACCTGTCACCCCGCCCAGCTAATTT  
TTTGTATTTTTTAGTAGAGACAGGGTTTCACCATGTTGGCCAGAATGGTCTCGATCTCTTG  
ACCTTGCGATCCATCCACCTCG

>1147

GGGACTACAGGCACCTGTCACCCCGCCCAGCTAATTTTTTGTATTTTATAGTAGAGACAG  
GGTTTCACCATGTTGGCCAGAATGGTCTCGATCTCTTGACCTTGCGATCCATCCACCTC  
GGCCTCCCAAAGTGCTGGGATT

>1148

GGTTTCACCATGTTGGCCAGAATGGTCTCGATCTCTTGACCTTGCGATCCATCCACCTC  
GGCCTCCCAAAGTGCTGGGATTACAGCTGTGAGCCACCCCGCCCGGCCTTCACTCACT  
TCTTAAAATGGAGACGGTCAACA

>1149

CAGAATGGTCTCGATCTCTTGACCTTGCGATCCATCCACCTCGGCCTCCCAAAGTGCTG  
GGATTACAGCTGTGAGCCACCCCGCCCGGCCTTCACTCACTTCTTAAAATGGAGACGG  
TCAACAGGGTTGGTGCTGAATTA

>1150

TCCCAAAGTGCTGGGATTACAGCTGTGAGCCACCCCGCCCGGCCTTCACTCACTTCTT  
AAAATGGAGACGGTCAACAGGGTTGGTGCTGAATTAATGAAGTAAGATCCAGAAATCA  
CTAGAGCTGTGATGGGCACATAGT

>1151

GCTGGGATTACAGCTGTGAGCCACCCCGCCCGGCCTTCACTCACTTCTTAAAATGGAG  
ACGGTCAACAGGGTTGGTGCTGAATTAATGAAGTAAGATCCAGAAATCACTAGAGCTG

TGATGGGCACATAGTCACCGCAGC

>1152

CCACCCCGCCCGGCCTTCACTCACTTCTTAAAATGGAGACGGTCAACAGGGTTGGTGC  
TGAATTAATGAAGTAAGATCCAGAAATCACTAGAGCTGTGATGGGCACATAGTCACCG  
CAGCGGTGGAGAACTGACCATCTG

>1153

TCTTAAAATGGAGACGGTCAACAGGGTTGGTGCTGAATTAATGAAGTAAGATCCAGAA  
ATCACTAGAGCTGTGATGGGCACATAGTCACCGCAGCGGTGGAGAACTGACCATCTGT  
CCCTTGTGTTGTTTAGGCCTCATC

>1154

CGGTCAACAGGGTTGGTGCTGAATTAATGAAGTAAGATCCAGAAATCACTAGAGCTGT  
GATGGGCACATAGTCACCGCAGCGGTGGAGAACTGACCATCTGTCCCTTGTGTTGTTT  
AGGCCTCATCTCTGCATGGTCCTC

>1155

TTGGTGCTGAATTAATGAAGTAAGATCCAGAAATCACTAGAGCTGTGATGGGCACATAG  
TCACCGCAGCGGTGGAGAACTGACCATCTGTCCCTTGTGTTGTTTAGGCCTCATCTCTG  
CATGGTCCTCATTGGCTCTGAG

>1156

AGTAAGATCCAGAAATCACTAGAGCTGTGATGGGCACATAGTCACCGCAGCGGTGGAG  
AACTGACCATCTGTCCCTTGTGTTGTTTAGGCCTCATCTCTGCATGGTCCTCATTGGCTC  
TGAGTTCTAGTGTGTAGTGTCC

>1157

TCCAGAAATCACTAGAGCTGTGATGGGCACATAGTCACCGCAGCGGTGGAGAACTGAC  
CATCTGTCCCTTGTGTTGTTTAGGCCTCATCTCTGCATGGTCCTCATTGGCTCTGAGTTC  
TAGTGTGTAGTGTCCACAGTGC

>1158

CACATAGTCACCGCAGCGGTGGAGAACTGACCATCTGTCCCTTGTGTTGTTTAGGCCTC  
ATCTCTGCATGGTCCTCATTGGCTCTGAGTTCTAGTGTGTAGTGTCCACAGTGCCACCC  
TCCATGAGGGTTGTGTTGACTG

>1159

GGTGGAGAACTGACCATCTGTCCCTTGTGTTGTTTAGGCCTCATCTCTGCATGGTCCTC  
ATTGGCTCTGAGTTCTAGTGTGTAGTGTCCACAGTGCCACCCTCCATGAGGGTTGTGTT  
GACTGTGAGGTGGTGCAGAGAA

>1160

GAACTGACCATCTGTCCCTTGTGTTGTTTAGGCCTCATCTCTGCATGGTCCTCATTGGCT  
CTGAGTTCTAGTGTGTAGTGTCCACAGTGCCACCCTCCATGAGGGTTGTGTTGACTGTG  
AGGTGGTGCAGAGAATGTCCC

>1161

CCTTGTGTTGTTTAGGCCTCATCTCTGCATGGTCCTCATTGGCTCTGAGTTCTAGTGTGT  
AGTGTCCACAGTGCCACCCTCCATGAGGGTTGTGTTGACTGTGAGGTGGTGCAGAGAA  
TGTCCCTGTCCTTGTGAGCATA

>1162

GGTCCTCATTGGCTCTGAGTTCTAGTGTGTAGTGTCCACAGTGCCACCCTCCATGAGGG  
TTGTGTTGACTGTGAGGTGGTGCAGAGAATGTCCCTGTCCTTGTGAGCATATGACAGC



AAGACACTGGCCCTGGAATCCTC

>1163

TCATTGGCTCTGAGTTCTAGTGTGTAGTGTCCACAGTGCCACCCTCCATGAGGGTTGTG  
TTGACTGTGAGGTGGTGCAGAGAATGTCCCTGTCCTTGTGAGCATATGACAGCAAGAC  
ACTGGCCCTGGAATCCTCCGTGT

>1164

TTCTAGTGTGTAGTGTCCACAGTGCCACCCTCCATGAGGGTTGTGTTGACTGTGAGGT  
GGTGCAGAGAATGTCCCTGTCCTTGTGAGCATATGACAGCAAGACACTGGCCCTGGAA  
TCCTCCGTGTCACATGTGGGCTGC

>1165

TGAGGTGGTGCAGAGAATGTCCCTGTCCTTGTGAGCATATGACAGCAAGACACTGGCC  
CTGGAATCCTCCGTGTCACATGTGGGCTGCTGACAGGAAGAATGTGCTTTTGTGTTGT  
TGTTGTTGTTGAGGCAGAGTCTT

>1166

AGGTGGTGCAGAGAATGTCCCTGTCCTTGTGAGCATATGACAGCAAGACACTGGCCCT  
GGAATCCTCCGTGTCACATGTGGGCTGCTGACAGGAAGAATGTGCTTTTGTGTTGTTG  
TTGTTGTTGAGGCAGAGTCTTAC

>1167

TGAGCATATGACAGCAAGACACTGGCCCTGGAATCCTCCGTGTCACATGTGGGCTGCT  
GACAGGAAGAATGTGCTTTTGTGTTGTTGTTGTTGTTGTTGAGGCAGAGTCTTACTCTGTC  
GCCCAGGCTGCAGTGCAGTGGCA

>1168

GACACTGGCCCTGGAATCCTCCGTGTCACATGTGGGCTGCTGACAGGAAGAATGTGCT  
TTTGTGTTGTTGTTGTTGTTGTTGAGGCAGAGTCTTACTCTGTCGCCCAGGCTGCAGTGCA  
GTGGCATGATCTTGGCTCACTGC

>1169

ACTGGCCCTGGAATCCTCCGTGTCACATGTGGGCTGCTGACAGGAAGAATGTGCTTTT  
GTTGTTGTTGTTGTTGTTGTTGAGGCAGAGTCTTACTCTGTCGCCCAGGCTGCAGTGCAGT  
GGCATGATCTTGGCTCACTGCAAC

>1170

CCTCCGTGTCACATGTGGGCTGCTGACAGGAAGAATGTGCTTTTGTGTTGTTGTTGTTGTT  
GTTGAGGCAGAGTCTTACTCTGTCGCCCAGGCTGCAGTGCAGTGGCATGATCTTGGCT  
CACTGCAACCTCTACTTCCCCGGG

>1171

ACATGTGGGCTGCTGACAGGAAGAATGTGCTTTTGTGTTGTTGTTGTTGTTGAGGCA  
GAGTCTTACTCTGTCGCCCAGGCTGCAGTGCAGTGGCATGATCTTGGCTCACTGCAAC  
CTCTACTTCCCCGGGTTCAAGTGAT

>1172

AGTCTTACTCTGTCGCCCAGGCTGCAGTGCAGTGGCATGATCTTGGCTCACTGCAACCT  
CTACTTCCCCGGGTTCAAGTGATTCTCCTGCCTCAGCCTCCTGAGCAGCTGGGACTACA  
GATGTGTACCACCATGCCCGACT

>1173

ACTCTGTCGCCCAGGCTGCAGTGCAGTGGCATGATCTTGGCTCACTGCAACCTCTACTT  
CCCCGGGTTCAAGTGATTCTCCTGCCTCAGCCTCCTGAGCAGCTGGGACTACAGATGTG

TACCACCATGCCCCGACTAATTTT

>1174

CTGCAACCTCTACTTCCCCGGGTTCAAGTGATTCTCCTGCCTCAGCCTCCTGAGCAGCTG  
GGACTACAGATGTGTACCACCATGCCCCGACTAATTTTGTATTTTATAGTAGAGATGGGGT  
TTCACCATGTTGGTCAGGCTG

>1175

GCAACCTCTACTTCCCCGGGTTCAAGTGATTCTCCTGCCTCAGCCTCCTGAGCAGCTGG  
GACTACAGATGTGTACCACCATGCCCCGACTAATTTTGTATTTTATAGTAGAGATGGGGT  
TCACCATGTTGGTCAGGCTGGC

>1176

TGATTCTCCTGCCTCAGCCTCCTGAGCAGCTGGGACTACAGATGTGTACCACCATGCCC  
GACTAATTTTGTATTTTATAGTAGAGATGGGGTTTCACCATGTTGGTCAGGCTGGCCTG  
GAACTCCTGGCCTTAAGTGATC

>1177

CCTGAGCAGCTGGGACTACAGATGTGTACCACCATGCCCCGACTAATTTTGTATTTTA  
GTAGAGATGGGGTTTCACCATGTTGGTCAGGCTGGCCTGGAACCTCCTGGCCTTAAGTG  
ATCCACCTGTCTCGGCCTCCCAT

>1178

TGGGACTACAGATGTGTACCACCATGCCCCGACTAATTTTGTATTTTATAGTAGAGATGGG  
GTTTCACCATGTTGGTCAGGCTGGCCTGGAACCTCCTGGCCTTAAGTGATCCACCTGTCT  
CGGCCTCCCATAGTGCTGGGA

>1179

ATTTTGTATTTTATAGTAGAGATGGGGTTTCACCATGTTGGTCAGGCTGGCCTGGAAC  
CCTGGCCTTAAGTGATCCACCTGTCTCGGCCTCCCATAGTGCTGGGATTATAGGTGTGT  
GCCACCTGCTGGGCCGAGAAT

>1180

TTTAGTAGAGATGGGGTTTCACCATGTTGGTCAGGCTGGCCTGGAACCTCCTGGCCTTAA  
GTGATCCACCTGTCTCGGCCTCCCATAGTGCTGGGATTATAGGTGTGTGCCACCCTGCT  
GGGCCGAGAATGTGCTTTTGAC

>1181

TTTCACCATGTTGGTCAGGCTGGCCTGGAACCTCCTGGCCTTAAGTGATCCACCTGTCTC  
GGCCTCCCATAGTGCTGGGATTATAGGTGTGTGCCACCCTGCTGGGCCGAGAATGTGCT  
TTTGACTGAGGGTGGAAAGTCA

>1182

CAGGCTGGCCTGGAACCTCCTGGCCTTAAGTGATCCACCTGTCTCGGCCTCCCATAGTGC  
TGGGATTATAGGTGTGTGCCACCCTGCTGGGCCGAGAATGTGCTTTTGACTGAGGGTG  
GAAAGTCAGCAGCTGCAGCCCAA

>1183

GGCCTCCCATAGTGCTGGGATTATAGGTGTGTGCCACCCTGCTGGGCCGAGAATGTGCT  
TTTGACTGAGGGTGGAAAGTCAGCAGCTGCAGCCCAAGAAGTTAGAGCCAGGGGCAG  
TGCCTTTGATGGGAAGCTTGGGGG

>1184

CATAGTGCTGGGATTATAGGTGTGTGCCACCCTGCTGGGCCGAGAATGTGCTTTTGACT  
GAGGGTGGAAAGTCAGCAGCTGCAGCCCAAGAAGTTAGAGCCAGGGGCAGTGCCTTT

GATGGGAAGCTTGGGGGTCTAAAG

>1185

TGTGCCACCCTGCTGGGCCGAGAATGTGCTTTTGAAGTCTGAGGGTGGAAAGTCAGCAGCT  
GCAGCCCAAGAAGTTAGAGCCAGGGGCAGTGCCTTTGATGGGAAGCTTGGGGGTCTA  
AAGAAATCAGAAAGGGGAGAAAATA

>1186

GCCGAGAATGTGCTTTTGAAGTCTGAGGGTGGAAAGTCAGCAGCTGCAGCCCAAGAAGTT  
AGAGCCAGGGGCAGTGCCTTTGATGGGAAGCTTGGGGGTCTAAAGAAATCAGAAAGG  
GGAGAAAATAATCCTGCGTGTGCTCA

>1187

GGTGGAAAGTCAGCAGCTGCAGCCCAAGAAGTTAGAGCCAGGGGCAGTGCCTTTGAT  
GGGAAGCTTGGGGGTCTAAAGAAATCAGAAAGGGGAGAAAATAATCCTGCGTGTGCT  
CAGCCCTCACTCAGATCAACAGCCCC

>1188

CCAGGGGCAGTGCCTTTGATGGGAAGCTTGGGGGTCTAAAGAAATCAGAAAGGGGAG  
AAAATAATCCTGCGTGTGCTCAGCCCTCACTCAGATCAACAGCCCCCTCGGGTCCCAGC  
TAGATGTACTTTGTAGAAGGCTTTT

>1189

AGGGGCAGTGCCTTTGATGGGAAGCTTGGGGGTCTAAAGAAATCAGAAAGGGGAGAA  
AATAATCCTGCGTGTGCTCAGCCCTCACTCAGATCAACAGCCCCCTCGGGTCCCAGCTA  
GATGTACTTTGTAGAAGGCTTTTTT

>1190

AAAGAAATCAGAAAGGGGAGAAAATAATCCTGCGTGTGCTCAGCCCTCACTCAGATCA  
ACAGCCCCCTCGGGTCCCAGCTAGATGTACTTTGTAGAAGGCTTTTTTTCTCCCCCTCAC  
CCTCAAAACTCCAGGATTAATGT

>1191

AGGGGAGAAAATAATCCTGCGTGTGCTCAGCCCTCACTCAGATCAACAGCCCCCTCGGG  
TCCCAGCTAGATGTACTTTGTAGAAGGCTTTTTTTCTCCCCCTCACCTCAAAACTCCA  
GGATTAATGTGCTATTCCCTTTT

>1192

GGGTCCCAGCTAGATGTACTTTGTAGAAGGCTTTTTTTCTCCCCCTCACCTCAAAACT  
CCAGGATTAATGTGCTATTCCCTTTTTTCTACTGTTCTCTGTCTCCCCCAACCCATCAG  
CAGTCTGAGAAATGCTATGGT

>1193

GTAGAAGGCTTTTTTTCTCCCCCTCACCTCAAAACTCCAGGATTAATGTGCTATTCCCT  
TTTTTCTACTGTTCTCTGTCTCCCCCAACCCATCAGCAGTCTGAGAAATGCTATGGTG  
GAAAAAAAAAAAAACAACAGCCC

>1194

GCTTTTTTTCTCCCCCTCACCTCAAAACTCCAGGATTAATGTGCTATTCCCTTTTTTCT  
ACTGTTCTCTGTCTCCCCCAACCCATCAGCAGTCTGAGAAATGCTATGGTGGAAGAAA  
AAAAACAACAGCCCTATAACC

>1195

TCAAAACTCCAGGATTAATGTGCTATTCCCTTTTTTCTACTGTTCTCTGTCTCCCCCAA  
CCCATCAGCAGTCTGAGAAATGCTATGGTGGAAGAAAAAAAAACAACAGCCCTATAACC

AGTACAAACAAAAAGCCAAGAC

>1196

TCTCCCCCAACCCATCAGCAGTCTGAGAAATGCTATGGTGGAAAAAAAAAAAAACAAC  
AGCCCTATAACCAGTACAAACAAAAAGCCAAGACAAAAAAAAAAAAAAAAAAAAATC  
AGAAGGGGAGATTTTGAGGCCAGGAAG

>1197

AAAAAAAAAAAAAATCAGAAGGGGAGATTTTGAGGCCAGGAAGCCATGGCATTAC  
TGGAAATATATCAGTGATAAAATAACAGGCTACAGGGTTTATTTTATTTTATTTTAAGTC  
AATAGGCCTGAGTGTTGGTAAA

>1198

GGAGATTTTGAGGCCAGGAAGCCATGGCATTCACTGGAAATATATCAGTGATAAAATAA  
CAGGCTACAGGGTTTATTTTATTTTATTTTAAAGTCAATAGGCCTGAGTGTTGGTAAAGA  
CTAGATACCCAGCAATCCTTC

>1199

CATGGCATTCACTGGAAATATATCAGTGATAAAATAACAGGCTACAGGGTTTATTTTATT  
TTATTTTAAAGTCAATAGGCCTGAGTGTTGGTAAAGACTAGATACCCAGCAATCCTTCTT  
GCATTTCTTCTTGGGGTCGG

>1200

GAAATATATCAGTGATAAAATAACAGGCTACAGGGTTTATTTTATTTTATTTTAAAGTCAA  
TAGGCCTGAGTGTTGGTAAAGACTAGATACCCAGCAATCCTTCTTGCATTTCTTCTTGG  
GGTCGGGGGGCAGAAGGGAA

>1201

AATATATCAGTGATAAAATAACAGGCTACAGGGTTTATTTTATTTTATTTTAAAGTCAATA  
GGCCTGAGTGTTGGTAAAGACTAGATACCCAGCAATCCTTCTTGCATTTCTTCTTGGGG  
TCGGGGGGCAGAAGGGAATG

>1202

TATCAGTGATAAAATAACAGGCTACAGGGTTTATTTTATTTTATTTTAAAGTCAATAGGCC  
TGAGTGTTGGTAAAGACTAGATACCCAGCAATCCTTCTTGCATTTCTTCTTGGGGTCGG  
GGGGCAGAAGGGAATGGAGA

>1203

TTTAAAGTCAATAGGCCTGAGTGTTGGTAAAGACTAGATACCCAGCAATCCTTCTTGCAT  
TTCTTCTTGGGGTCGGGGGGCAGAAGGGAATGGAGAGGAAATGAAGGCGGATTGCTG  
GTAAGTGAGGCAGGAAGGCAGGGA

>1204

ATCCTTCTTGCATTTCTTCTTGGGGTCGGGGGGCAGAAGGGAATGGAGAGGAAATGAA  
GGCGGATTGCTGGTAAGTGAGGCAGGAAGGCAGGGAGTTTATTATGGAATGTCATCGG  
TAAGTTTCCCCATGATTGATCCC

>1205

TTCTTGCATTTCTTCTTGGGGTCGGGGGGCAGAAGGGAATGGAGAGGAAATGAAGGC  
GGATTGCTGGTAAGTGAGGCAGGAAGGCAGGGAGTTTATTATGGAATGTCATCGGTAA  
GTTTCCCCATGATTTGATCCCAAGC

>1206

GTCGGGGGGCAGAAGGGAATGGAGAGGAAATGAAGGCGGATTGCTGGTAAGTGAGG  
CAGGAAGGCAGGGAGTTTATTATGGAATGTCATCGGTAAGTTTCCCCATGATTTGATCC

CAAGCTGGTGTGGAGTGAAGGGTAA

>1207

GGGAATGGAGAGGAAATGAAGGCGGATTGCTGGTAAGTGAGGCAGGAAGGCAGGGA  
GTTTATTATGGAATGTCATCGGTAAGTTTCCCATGATTTGATCCCAAGCTGGTGTGGAG  
TGAAGGGTAAGCTGTTGGCTCAAC

>1208

GAGAGGAAATGAAGGCGGATTGCTGGTAAGTGAGGCAGGAAGGCAGGGAGTTTATTA  
TGGAATGTCATCGGTAAGTTTCCCATGATTTGATCCCAAGCTGGTGTGGAGTGAAGGG  
TAAGCTGTTGGCTCAACAGATAGT

>1209

GAGGCAGGAAGGCAGGGAGTTTATTATGGAATGTCATCGGTAAGTTTCCCATGATTTG  
ATCCCAAGCTGGTGTGGAGTGAAGGGTAAGCTGTTGGCTCAACAGATAGTGAGAATCA  
AACTTAGTGGAGTTGTAGATCCT

>1210

GAAGGCAGGGAGTTTATTATGGAATGTCATCGGTAAGTTTCCCATGATTTGATCCCAA  
GCTGGTGTGGAGTGAAGGGTAAGCTGTTGGCTCAACAGATAGTGAGAATCAAACCTTAG  
TGGAGTTGTAGATCCTGTTTCCT

>1211

GGGAGTTTATTATGGAATGTCATCGGTAAGTTTCCCATGATTTGATCCCAAGCTGGTGT  
GGAGTGAAGGGTAAGCTGTTGGCTCAACAGATAGTGAGAATCAAACCTTAGTGGAGTTG  
TAGATCCTGTTTCCTGCAGCGG

>1212

TATTATGGAATGTCATCGGTAAGTTTCCCATGATTTGATCCCAAGCTGGTGTGGAGTGA  
AGGGTAAGCTGTTGGCTCAACAGATAGTGAGAATCAAACCTTAGTGGAGTTGTAGATCC  
TGTTTCCTGCAGCGGACAGCAA

>1213

CGGTAAGTTTCCCATGATTTGATCCCAAGCTGGTGTGGAGTGAAGGGTAAGCTGTTG  
GCTCAACAGATAGTGAGAATCAAACCTTAGTGGAGTTGTAGATCCTGTTTCCTGCAGCG  
GACAGCAAGATGTACAAGCCGTCC

>1214

GTGTGGAGTGAAGGGTAAGCTGTTGGCTCAACAGATAGTGAGAATCAAACCTTAGTGGA  
GTTGTAGATCCTGTTTCCTGCAGCGGACAGCAAGATGTACAAGCCGTCCACTGCAGGA  
ATGACGTGCTGTAAAAGGGATGCA

>1215

GGCTCAACAGATAGTGAGAATCAAACCTTAGTGGAGTTGTAGATCCTGTTTCCTGCAGC  
GGACAGCAAGATGTACAAGCCGTCCACTGCAGGAATGACGTGCTGTAAAAGGGATGC  
AGTGTCAAGTGTAGTCATGGATGGG

>1216

GATAGTGAGAATCAAACCTTAGTGGAGTTGTAGATCCTGTTTCCTGCAGCGGACAGCAA  
GATGTACAAGCCGTCCACTGCAGGAATGACGTGCTGTAAAAGGGATGCAGTGTCAAGT  
GTAGTCATGGATGGGTGGAAGAC

>1217

GAGTTGTAGATCCTGTTTCCTGCAGCGGACAGCAAGATGTACAAGCCGTCCACTGCAG  
GAATGACGTGCTGTAAAAGGGATGCAGTGTCAAGTGTAGTCATGGATGGGTGGAAG

ACCAGACAAAGGCATCCAATGGGAC

>1218

GTTTCCTGCAGCGGACAGCAAGATGTACAAGCCGTCCACTGCAGGAATGACGTGCTGT  
AAAAGGGATGCAGTGTCAAGTGTAGTCATGGATGGGTGGGAAGACCAGACAAAGGCA  
TCCAATGGGACTGACTTACCTAAAC

>1219

TTCCTGCAGCGGACAGCAAGATGTACAAGCCGTCCACTGCAGGAATGACGTGCTGTAA  
AAGGGATGCAGTGTCAAGTGTAGTCATGGATGGGTGGGAAGACCAGACAAAGGCATC  
CAATGGGACTGACTTACCTAAACAA

>1220

TGTACAAGCCGTCCACTGCAGGAATGACGTGCTGTAAAAGGGATGCAGTGTCAAGTGT  
AGTCATGGATGGGTGGGAAGACCAGACAAAGGCATCCAATGGGACTGACTTACCTAA  
ACAAACCAGAAGGAAGTCAGAACAG

>1221

TCATGGATGGGTGGGAAGACCAGACAAAGGCATCCAATGGGACTGACTTACCTAAACA  
AACCAGAAGGAAGTCAGAACAGTGGGAAGATCTGATAGATAAGCAGTATTCTGCAGG  
CAGATGAAGGAGCAAGCTTTGGGCC

>1222

GGTGGGAAGACCAGACAAAGGCATCCAATGGGACTGACTTACCTAAACAAACCAGAA  
GGAAGTCAGAACAGTGGGAAGATCTGATAGATAAGCAGTATTCTGCAGGCAGATGAAG  
GAGCAAGCTTTGGGCCCCCAAATCT

>1223

CCAATGGGACTGACTTACCTAAACAAACCAGAAGGAAGTCAGAACAGTGGGAAGATC  
TGATAGATAAGCAGTATTCTGCAGGCAGATGAAGGAGCAAGCTTTGGGCCCCCAAATC  
TTCACCAGTGCATCCACATTACAGA

>1224

AGATCTGATAGATAAGCAGTATTCTGCAGGCAGATGAAGGAGCAAGCTTTGGGCCCCC  
AAATCTTACCAGTGCATCCACATTACAGAGGATAATGCCTGAGGGAGGGGAAGATCA  
TCTCAGGATTCTGGAACACTGGGC

>1225

GGGAGGGGAAGATCATCTCAGGATTCTGGAACACTGGGCCCTCCCTTTCTTATTCCAA  
AAGGCTGGAGCAGTTCTGCATGTAGGCTTCTCTGGAAATGGTCTAGGAACCAGCTCAT  
CCAGGCCAGGAGCACCTGATCATT

>1226

AGATCATCTCAGGATTCTGGAACACTGGGCCCTCCCTTTCTTATTCCAAAAGGCTGGAG  
CAGTTCTGCATGTAGGCTTCTCTGGAAATGGTCTAGGAACCAGCTCATCCAGGCCAGG  
AGCACCTGATCATTCTCAGAGTT

>1227

GAACACTGGGCCCTCCCTTTCTTATTCCAAAAGGCTGGAGCAGTTCTGCATGTAGGCTT  
CTCTGGAAATGGTCTAGGAACCAGCTCATCCAGGCCAGGAGCACCTGATCATTCTCAG  
AGTTACGTACATATGCGATAAGA

>1228

AGGCTTCTCTGGAAATGGTCTAGGAACCAGCTCATCCAGGCCAGGAGCACCTGATCAT  
TCTCAGAGTTACGTACATATGCGATAAGATTGCAGGGAACAGTATAGTTCTATAGACTTA

AGTGTGAACATAGTCCTCATTT

>1229

GCTCATCCAGGCCAGGAGCACCTGATCATTCTCAGAGTTACGTACATATGCGATAAGAT  
TGCAGGGAACAGTATAGTTCTATAGACTTAAGTGTGAACATAGTCCTCATTTATAGTCCC  
TAGTCTCCCATGGCTCACGCA

>1230

CCTGATCATTCTCAGAGTTACGTACATATGCGATAAGATTGCAGGGAACAGTATAGTTCT  
ATAGACTTAAGTGTGAACATAGTCCTCATTTATAGTCCCTAGTCTCCCATGGCTCACGCA  
GCTTGGTCTTTATGTGTTTC

>1231

TCAGAGTTACGTACATATGCGATAAGATTGCAGGGAACAGTATAGTTCTATAGACTTAA  
GTGTGAACATAGTCCTCATTTATAGTCCCTAGTCTCCCATGGCTCACGCAGCTTGGTCTT  
TATGTGTTTCTGAATTTAGTG

>1232

CATATGCGATAAGATTGCAGGGAACAGTATAGTTCTATAGACTTAAGTGTGAACATAGT  
CCTCATTTATAGTCCCTAGTCTCCCATGGCTCACGCAGCTTGGTCTTTATGTGTTTCTGA  
ATTTAGTGCTGCAGAGGCACA

>1233

GATAAGATTGCAGGGAACAGTATAGTTCTATAGACTTAAGTGTGAACATAGTCCTCATTT  
ATAGTCCCTAGTCTCCCATGGCTCACGCAGCTTGGTCTTTATGTGTTTCTGAATTTAGTG  
CTGCAGAGGCACAATGGGGT

>1234

GTTCTATAGACTTAAGTGTGAACATAGTCCTCATTTATAGTCCCTAGTCTCCCATGGCTC  
ACGCAGCTTGGTCTTTATGTGTTTCTGAATTTAGTGCTGCAGAGGCACAATGGGGTCTG  
GTTTCTGGATCTTATACAGAC

>1235

ATAGTCCTCATTTATAGTCCCTAGTCTCCCATGGCTCACGCAGCTTGGTCTTTATGTGTTT  
CTGAATTTAGTGCTGCAGAGGCACAATGGGGTCTGGTTTCTGGATCTTATACAGACAAG  
CACTTAGGTCAGCTGCAGTG

>1236

TAGTCTCCCATGGCTCACGCAGCTTGGTCTTTATGTGTTTCTGAATTTAGTGCTGCAGA  
GGCACAATGGGGTCTGGTTTCTGGATCTTATACAGACAAGCACTTAGGTCAGCTGCAG  
TGGATGTCCTGCACAGACACCGT

>1237

GTTTCTGAATTTAGTGCTGCAGAGGCACAATGGGGTCTGGTTTCTGGATCTTATACAGA  
CAAGCACTTAGGTCAGCTGCAGTGGATGTCCTGCACAGACACCGTCGCAACTCTTGCC  
TGGTTCCTTTTGTGTTTTGGAGA

>1238

TTAGTGCTGCAGAGGCACAATGGGGTCTGGTTTCTGGATCTTATACAGACAAGCACTTA  
GGTCAGCTGCAGTGGATGTCCTGCACAGACACCGTCGCAACTCTTGCTGGTTCCTTT  
TTGTTTTTGGAGATGGAGTCTCG

>1239

GGGTCTGGTTTCTGGATCTTATACAGACAAGCACTTAGGTCAGCTGCAGTGGATGTCCT  
GCACAGACACCGTCGCAACTCTTGCTGGTTCCTTTTGTGTTTTGGAGATGGAGTCTCG

CTCTGTCTCCCAGGCTGGAGTG

>1240

CAAGCACTTAGGTCAGCTGCAGTGGATGTCCTGCACAGACACCGTCGCAACTCTTGCC  
TGTTTCCTTTTTGTTTTGGAGATGGAGTCTCGCTCTGTCTCCCAGGCTGGAGTGCAGT  
GGCGCGATCTCAGCTCACTGCAA

>1241

GCTGCAGTGGATGTCCTGCACAGACACCGTCGCAACTCTTGCTGGTTCTTTTTGTTT  
TTGGAGATGGAGTCTCGCTCTGTCTCCCAGGCTGGAGTGCAGTGGCGCGATCTCAGCT  
CACTGCAAGCTCTGCCTCCCAGG

>1242

ATGTCCTGCACAGACACCGTCGCAACTCTTGCTGGTTCTTTTTGTTTTTGGAGATGG  
AGTCTCGCTCTGTCTCCCAGGCTGGAGTGCAGTGGCGCGATCTCAGCTCACTGCAAGC  
TCTGCCTCCCAGGTTACGCTAT

>1243

AGTCTCGCTCTGTCTCCCAGGCTGGAGTGCAGTGGCGCGATCTCAGCTCACTGCAAGC  
TCTGCCTCCCAGGTTACGCTATTCTCCTGCCTCAGCCTCCCAAGTAGTTGGGACTACA  
GGCACCCGCCACCACGCCCGGCT

>1244

TGGCGCGATCTCAGCTCACTGCAAGCTCTGCCTCCCAGGTTACGCTATTCTCCTGCCT  
CAGCCTCCCAAGTAGTTGGGACTACAGGCACCCGCCACCACGCCCGGCTAATTTTTTG  
TATTTTTAGTAGAGACAGGGTTT

>1245

CGCGATCTCAGCTCACTGCAAGCTCTGCCTCCCAGGTTACGCTATTCTCCTGCCTCAG  
CCTCCCAAGTAGTTGGGACTACAGGCACCCGCCACCACGCCCGGCTAATTTTTTGTATT  
TTTAGTAGAGACAGGGTTTAC

>1246

TATTCTCCTGCCTCAGCCTCCCAAGTAGTTGGGACTACAGGCACCCGCCACCACGCC  
GGCTAATTTTTTGTATTTTTAGTAGAGACAGGGTTTACCGTGTTAGCCAGTATGGTCTC  
GATCTCCTGAACTCGTGATCCA

>1247

CCAAGTAGTTGGGACTACAGGCACCCGCCACCACGCCCGGCTAATTTTTTGTATTTTTA  
GTAGAGACAGGGTTTACCGTGTTAGCCAGTATGGTCTCGATCTCCTGAACTCGTGATC  
CACCTGCCTCGGCCTCCCAAAG

>1248

TTGGGACTACAGGCACCCGCCACCACGCCCGGCTAATTTTTTGTATTTTTAGTAGAGAC  
AGGGTTTACCGTGTTAGCCAGTATGGTCTCGATCTCCTGAACTCGTGATCCACCTGCC  
TCGGCCTCCCAAAGTGCTGGGA

>1249

CCCGCCACCACGCCCGGCTAATTTTTTGTATTTTTAGTAGAGACAGGGTTTACCGTGT  
TAGCCAGTATGGTCTCGATCTCCTGAACTCGTGATCCACCTGCCTCGGCCTCCCAAAGT  
GCTGGGATTACAGGTGTGAGCC

>1250

GGTTTACCGTGTTAGCCAGTATGGTCTCGATCTCCTGAACTCGTGATCCACCTGCCTC  
GGCCTCCCAAAGTGCTGGGATTACAGGTGTGAGCCACCACGCCCGGCCTATTGCCTGG



TTCTTGAAGGGATTCTCAGGAAC

>1251

GCCAGTATGGTCTCGATCTCCTGAACTCGTGATCCACCTGCCTCGGCCTCCCAAAGTGC  
TGGGATTACAGGTGTGAGCCACCACGCCCGGCCTATTGCCTGGTTCTTGAAGGGATTCT  
CAGGAACCACAGGGAATGTCTG

>1252

ATCCACCTGCCTCGGCCTCCCAAAGTGCTGGGATTACAGGTGTGAGCCACCACGCCCG  
GCCTATTGCCTGGTTCTTGAAGGGATTCTCAGGAACCACAGGGAATGTCTGAGCCAGC  
TTTCTGGATCCGTGTGTACAGCCC

>1253

TACAGGTGTGAGCCACCACGCCCGGCCTATTGCCTGGTTCTTGAAGGGATTCTCAGGA  
ACCACAGGGAATGTCTGAGCCAGCTTTCTGGATCCGTGTGTACAGCCCTTCCCAGAGG  
CTTTGTGGAGCCAGCTGTACGGTG

>1254

GGCCTATTGCCTGGTTCTTGAAGGGATTCTCAGGAACCACAGGGAATGTCTGAGCCAG  
CTTTCTGGATCCGTGTGTACAGCCCTTCCCAGAGGCTTTGTGGAGCCAGCTGTACGGT  
GCATGAGCTTTGTGGCTAAGATAT

>1255

CCTATTGCCTGGTTCTTGAAGGGATTCTCAGGAACCACAGGGAATGTCTGAGCCAGCT  
TTCTGGATCCGTGTGTACAGCCCTTCCCAGAGGCTTTGTGGAGCCAGCTGTACGGTGC  
ATGAGCTTTGTGGCTAAGATATCA

>1256

TCTCAGGAACCACAGGGAATGTCTGAGCCAGCTTTCTGGATCCGTGTGTACAGCCCTT  
CCCAGAGGCTTTGTGGAGCCAGCTGTACGGTGCATGAGCTTTGTGGCTAAGATATCAG  
AGTTCTGCCTGGCCCTTGGCCTTG

>1257

CAGGGAATGTCTGAGCCAGCTTTCTGGATCCGTGTGTACAGCCCTTCCCAGAGGCTTT  
GTGGAGCCAGCTGTACGGTGCATGAGCTTTGTGGCTAAGATATCAGAGTTCTGCCTGG  
CCCTTGGCCTTGGTCTCTCTCAGA

>1258

GTACAGCCCTTCCCAGAGGCTTTGTGGAGCCAGCTGTACGGTGCATGAGCTTTGTGGC  
TAAGATATCAGAGTTCTGCCTGGCCCTTGGCCTTGGTCTCTCTCAGATGGTCAGCTGCT  
CTGTTTTTAGTGGTTGATCATGT

>1259

GTGGAGCCAGCTGTACGGTGCATGAGCTTTGTGGCTAAGATATCAGAGTTCTGCCTGG  
CCCTTGGCCTTGGTCTCTCTCAGATGGTCAGCTGCTCTGTTTTTAGTGGTTGATCATGTA  
GAAGGCCAACAGGTGTTGACCT

>1260

CTTTGTGGCTAAGATATCAGAGTTCTGCCTGGCCCTTGGCCTTGGTCTCTCTCAGATGG  
TCAGCTGCTCTGTTTTTAGTGGTTGATCATGTAGAAGGCCAACAGGTGTTGACCTTGGT  
TTAGGCTACTTTTGGGATTTTT

>1261

GCTAAGATATCAGAGTTCTGCCTGGCCCTTGGCCTTGGTCTCTCTCAGATGGTCAGCTG  
CTCTGTTTTTAGTGGTTGATCATGTAGAAGGCCAACAGGTGTTGACCTTGGTTTAGGCT

ACTTTTGGGATTTTGGAGGTTT

>1262

GAGTTCTGCCTGGCCCTTGGCCTTGGTCTCTCTCAGATGGTCAGCTGCTCTGTTTTAG  
TGGTTGATCATGTAGAAGGCCAACAGGTGTTGACCTTGGTTTAGGCTACTTTTGGGATT  
TTTGAGGTTTCCTGAGACTCTT

>1263

CTCTCTCAGATGGTCAGCTGCTCTGTTTTTAGTGGTTGATCATGTAGAAGGCCAACAGG  
TGTTGACCTTGGTTTAGGCTACTTTTGGGATTTTGGAGGTTTCCTGAGACTCTTGGTTTT  
CTTTCATCATCCCGTCCAGAA

>1264

TTTAGTGGTTGATCATGTAGAAGGCCAACAGGTGTTGACCTTGGTTTAGGCTACTTTTG  
GGATTTTGGAGGTTTCCTGAGACTCTTGGTTTTCTTTCATCATCCCGTCCAGAACCTCTG  
ATGTCAAATAAATTCTGTTT

>1265

TAGAAGGCCAACAGGTGTTGACCTTGGTTTAGGCTACTTTTGGGATTTTGGAGGTTTCC  
TGAGACTCTTGGTTTTCTTTCATCATCCCGTCCAGAACCTCTGATGTCAAATAAATTCT  
GTTTGGAAAAGGGTATGCTGT

>1266

TACTTTTGGGATTTTGGAGGTTTCCTGAGACTCTTGGTTTTCTTTCATCATCCCGTCCAG  
AACCTCTGATGTCAAATAAATTCTGTTTGGAAAAGGGTATGCTGTAGAATAATGATAG  
CCACAGCAATGATATTAATAA

>1267

TGAGGTTTCCTGAGACTCTTGGTTTTCTTTCATCATCCCGTCCAGAACCTCTGATGTCA  
AAATAAATTCTGTTTGGAAAAGGGTATGCTGTAGAATAATGATAGCCACAGCAATGATA  
TTAATAATACCTTTTATCGGTT

>1268

AGACTCTTGGTTTTCTTTCATCATCCCGTCCAGAACCTCTGATGTCAAATAAATTCTGT  
TTGGAAAAGGGTATGCTGTAGAATAATGATAGCCACAGCAATGATATTAATAATACCTTT  
TATCGGTTGCAGCATTTTCT

>1269

TCTGTTTGGAAAAGGGTATGCTGTAGAATAATGATAGCCACAGCAATGATATTAATAATA  
CCTTTTATCGGTTGCAGCATTTTCTTCTTTGCAAAGCACCTCTAATGACTTTATCTCTCTT  
GCCCTCACAGCCTTCCTTG

>1270

TTGCAGCATTTTCTTCTTTGCAAAGCACCTCTAATGACTTTATCTCTCTTGCCCTCACAG  
CCTTCCTTGAGTGGGTACAGGTCCATAATCCCATATCTGTGATAATGAAGTCTGAAAAG  
CTCTGAAAATAAAAAGTTTG

>1271

AGCATTTTCTTCTTTGCAAAGCACCTCTAATGACTTTATCTCTCTTGCCCTCACAGCCTT  
CCTTGAGTGGGTACAGGTCCATAATCCCATATCTGTGATAATGAAGTCTGAAAAGCTCT  
GAAAATAAAAAGTTTGCAGT

>1272

CTCTAATGACTTTATCTCTCTTGCCCTCACAGCCTTCCTTGAGTGGGTACAGGTCCATAA  
TCCCATATCTGTGATAATGAAGTCTGAAAAGCTCTGAAAATAAAAAGTTTGCAGTAA

ACTCATTTAGTGGCAAAACCTG

>1273

TTATCTCTCTTGCCCTCACAGCCTTCCTTGAGTGGGTACAGGTCCATAATCCCATATCTG  
TGATAATGAAGTCTGAAAAGCTCTGAAAAGCTTTGCAGTAACTCATTAGT  
GGCAAAACCTGATCTGAACTGA

>1274

CTTGAGTGGGTACAGGTCCATAATCCCATATCTGTGATAATGAAGTCTGAAAAGCTCTG  
AAAAGCTTTGCAGTAACTCATTAGTGGCAAAACCTGATCTGAACTGATGT  
GAGGCTATATTTATCCTGCTTAG

>1275

TAATCCCATATCTGTGATAATGAAGTCTGAAAAGCTCTGAAAAGCTTTGCAGT  
AACTCATTAGTGGCAAAACCTGATCTGAACTGATGTGAGGCTATATTTATCCTGCTTA  
GTTTGAATATTCATATGTTTT

>1276

TCTGAAAAGCTCTGAAAAGCTTTGCAGTAACTCATTAGTGGCAAAACCTG  
ATCTGAACTGATGTGAGGCTATATTTATCCTGCTTAGTTTGAATATTCATATGTTTTGCTG  
CAAAAATATTAATGTGTTTGA

>1277

AGTTTGCAGTAACTCATTAGTGGCAAAACCTGATCTGAACTGATGTGAGGCTATATT  
TATCCTGCTTAGTTTGAATATTCATATGTTTTGCTGCAAAAATATTAATGTGTTTGATTAC  
AGAGTGCTGCCCTAGACTCT

>1278

ATTTAGTGGCAAAACCTGATCTGAACTGATGTGAGGCTATATTTATCCTGCTTAGTTTGA  
ATATTCATATGTTTTGCTGCAAAAATATTAATGTGTTTGATTACAGAGTGCTGCCCTAGA  
CTCTGCTGGGGCTGTAAAC

>1279

GAACTGATGTGAGGCTATATTTATCCTGCTTAGTTTGAATATTCATATGTTTTGCTGCAAA  
AATATTAATGTGTTTGATTACAGAGTGCTGCCCTAGACTCTGCTGGGGCTGTAAACAC  
GATAGGTGTCAGAGTACCTT

>1280

TATATTTATCCTGCTTAGTTTGAATATTCATATGTTTTGCTGCAAAAATATTAATGTGTTTG  
ATTACAGAGTGCTGCCCTAGACTCTGCTGGGGCTGTAAACACGATAGGTGTCAGAGT  
ACCTTTCTTTTTTTTTTTTT

>1281

TTCATATGTTTTGCTGCAAAAATATTAATGTGTTTGATTACAGAGTGCTGCCCTAGACTC  
TGCTGGGGCTGTAAACACGATAGGTGTCAGAGTACCTTTCTTTTTTTTTTTTTTTTTTTT  
TTTTTGAGACGGAGTCTCGC

>1282

TGCAAAAATATTAATGTGTTTGATTACAGAGTGCTGCCCTAGACTCTGCTGGGGCTGTT  
AAACACGATAGGTGTCAGAGTACCTTTCTTTTTTTTTTTTTTTTTTTTTTGAGACGGA  
GTCTCGCTCTGTCGCCAGGT

>1283

TGGGGCTGTAAACACGATAGGTGTCAGAGTACCTTTCTTTTTTTTTTTTTTTTTTTTTTT  
TGAGACGGAGTCTCGCTCTGTCGCCAGGTGCGACTGCGGACTGCAGTGGCGCAATCT

CGGCTCACTGCAAGCTCCGCT

>1284

AAACACGATAGGTGTCAGAGTACCTTTCTTTTTTTTTTTTTTTTTTTTTTTGAGACGGA  
GTCTCGCTCTGTGCGCCAGGTGCGACTGCGGACTGCAGTGGCGCAATCTCGGCTCACT  
GCAAGCTCCGCTTCCCGGGTTC

>1285

CTTTTTTTTTTTTTTTTTTTTTTTTTTTGAGACGGAGTCTCGCTCTGTGCGCCAGGTGCGACT  
GCGGACTGCAGTGGCGCAATCTCGGCTCACTGCAAGCTCCGCTTCCCGGGTTCATGCC  
ATTCTCCTGCCTCAGCCTCCCG

>1286

CTCTGTGCGCCAGGTGCGACTGCGGACTGCAGTGGCGCAATCTCGGCTCACTGCAAGC  
TCCGCTTCCCGGGTTCATGCCATTCTCCTGCCTCAGCCTCCCGAGTAGCTGGGACTACA  
GGCGCCCGCCACCGCGCCCGGCT

>1287

TGGCGCAATCTCGGCTCACTGCAAGCTCCGCTTCCCGGGTTCATGCCATTCTCCTGCCT  
CAGCCTCCCGAGTAGCTGGGACTACAGGCGCCCGCCACCGCGCCCGGCTAATTTTTTG  
TATTTTATAGTAGAGACGGGGTTT

>1288

CATTCTCCTGCCTCAGCCTCCCGAGTAGCTGGGACTACAGGCGCCCGCCACCGCGCCC  
GGCTAATTTTTTGTATTTTATAGTAGAGACGGGGTTTACCTTGTTAGCCAGGATGGTCTC  
GATCTCCTGACCTCATGATCCA

>1289

GCCTCAGCCTCCCGAGTAGCTGGGACTACAGGCGCCCGCCACCGCGCCCGGCTAATTT  
TTTGTATTTTTAGTAGAGACGGGGTTTACCTTGTTAGCCAGGATGGTCTCGATCTCCTG  
ACCTCATGATCCACCCGCCTCG

>1290

CCGAGTAGCTGGGACTACAGGCGCCCGCCACCGCGCCCGGCTAATTTTTTGTATTTTGA  
GTAGAGACGGGGTTTACCTTGTTAGCCAGGATGGTCTCGATCTCCTGACCTCATGATC  
CACCCGCCTCGGCCTCCCAAAG

>1291

GGGACTACAGGCGCCCGCCACCGCGCCCGGCTAATTTTTTGTATTTTATAGTAGAGACGG  
GGTTTACCTTGTTAGCCAGGATGGTCTCGATCTCCTGACCTCATGATCCACCCGCCTC  
GGCCTCCCAAAGTGCTGGGATT

>1292

GGTTTACCTTGTTAGCCAGGATGGTCTCGATCTCCTGACCTCATGATCCACCCGCCTC  
GGCCTCCCAAAGTGCTGGGATTACAGGCGTGAGCACCGCGCCCGGCCAGAGTACCTT  
TCTAAAGTCTGAACAGTTTGGT

>1293

CAGGATGGTCTCGATCTCCTGACCTCATGATCCACCCGCCTCGGCCTCCCAAAGTGCTG  
GGATTACAGGCGTGAGCACCGCGCCCGGCCAGAGTACCTTTCTAAAGTCTGAACAGT  
TTTGGTCGTTGAAGCACCTGAAG

>1294

CTCATGATCCACCCGCCTCGGCCTCCCAAAGTGCTGGGATTACAGGCGTGAGCACCGC  
GCCCCGCCAGAGTACCTTTCTAAAGTCTGAACAGTTTTGGTCGTTGAAGCACCTGAA

GGTTTTGGATAAGGGATTATGAAC

>1295

CGCCTCGGCCTCCCAAAGTGCTGGGATTACAGGCGTGAGCACCGCGCCCGGCCAGAGTACCTTTCTAAAGTCTGAACAGTTTTGGTCGTTGAAGCACCTGAAGGTTTTGGATAAGGGATTATGAACGATTATCATTCTC

>1296

CTCCCAAAGTGCTGGGATTACAGGCGTGAGCACCGCGCCCGGCCAGAGTACCTTTCTAAAGTCTGAACAGTTTTGGTCGTTGAAGCACCTGAAGGTTTTGGATAAGGGATTATGAACGATTATCATTCTCTATTGACAA

>1297

GTGAGCACCGCGCCCGGCCAGAGTACCTTTCTAAAGTCTGAACAGTTTTGGTCGTTGAAGCACCTGAAGGTTTTGGATAAGGGATTATGAACGATTATCATTCTCTATTGACAAATGAGGAAAATGAGATTTGGAGCAA

>1298

GTTTTGGATAAGGGATTATGAACGATTATCATTCTCTATTGACAAATGAGGAAAATGAGATTTGGAGCAAGTAAGTGACTTCCCATGGTCACACAGCTATAAATGGGTAGAACCCAGGCCTCAGCTTGCCTTCTAATTCA

>1299

TGGATAAGGGATTATGAACGATTATCATTCTCTATTGACAAATGAGGAAAATGAGATTTGGAGCAAGTAAGTGACTTCCCATGGTCACACAGCTATAAATGGGTAGAACCCAGGCACTCAGCTTGCCTTCTAATTCACAGT

>1300

ATGAACGATTATCATTCTCTATTGACAAATGAGGAAAATGAGATTTGGAGCAAGTAAGTGACTTCCCATGGTCACACAGCTATAAATGGGTAGAACCCAGGCACTCAGCTTGCCTTCTAATTCACAGTCCTGGGCGCTCTG

>1301

TATTGACAAATGAGGAAAATGAGATTTGGAGCAAGTAAGTGACTTCCCATGGTCACACAGCTATAAATGGGTAGAACCCAGGCACTCAGCTTGCCTTCTAATTCACAGTCCTGGGCGCTCTGCACCCAGGCCATATAAGAAC

>1302

AAGTGACTTCCCATGGTCACACAGCTATAAATGGGTAGAACCCAGGCACTCAGCTTGCCCTTCTAATTCACAGTCCTGGGCGCTCTGCACCCAGGCCATATAAGAACATGAGCATTGCTCTTCTGGGTCAAATCCATCTGACC

>1303

TTGCCTTCTAATTCACAGTCCTGGGCGCTCTGCACCCAGGCCATATAAGAACATGAGCATTGCTCTTCTGGGTCAAATCCATCTGACCTAGTCTTTGGTTGCCATCACCATGCCTAAGATACCACCATGGAGGCTACAAC

>1304

CCTGGGCGCTCTGCACCCAGGCCATATAAGAACATGAGCATTGCTCTTCTGGGTCAAATCCTCTGACCTAGTCTTTGGTTGCCATCACCATGCCTAAGATACCACCATGGAGGCTACAACCATCTTCCTTGACGTCAAT

>1305

GCTCTGCACCCAGGCCATATAAGAACATGAGCATTGCTCTTCTGGGTCAAATCCATCTGACCTAGTCTTTGGTTGCCATCACCATGCCTAAGATACCACCATGGAGGCTACAACCATC

TTCCTTGACGTCAATCCTAAAG

>1306

GACCTAGTCTTTGGTTGCCATCACCATGCCTAAGATAACCACCATTGGAGGCTACAACCA  
TCTTCCTTGACGTCAATCCTAAAGGTCAGGTGTAGCTTCTCTTAGTAGCTATTTATGGCT  
GCCTTGTCATTACAGATTTG

>1307

GTTGCCATCACCATGCCTAAGATAACCACCATTGGAGGCTACAACCATCTTCCTTGACGT  
CAATCCTAAAGGTCAGGTGTAGCTTCTCTTAGTAGCTATTTATGGCTGCCTTGTCATTCA  
CAGATTTGCCAAAATCCTTTT

>1308

AACCATCTTCCTTGACGTCAATCCTAAAGGTCAGGTGTAGCTTCTCTTAGTAGCTATTTA  
TGGCTGCCTTGTCATTACAGATTTGCCAAAATCCTTTTTGAATCCATTTCCATTTCCAG  
GAAGTATCCTTTTTAGGGGT

>1309

CTATTTATGGCTGCCTTGTCATTACAGATTTGCCAAAATCCTTTTTGAATCCATTTCCAT  
TTCCAGGAAGTATCCTTTTTAGGGGTGATGAATGACAAGTTTATAATCTCCTGGGCTCCT  
GGAAATCTGGTCTTTTGA

>1310

TTGTCATTACAGATTTGCCAAAATCCTTTTTGAATCCATTTCCATTTCCAGGAAGTATC  
CTTTTTAGGGGTGATGAATGACAAGTTTATAATCTCCTGGGCTCCTGGAAATCTGGTCTT  
TTGGAGAGAGGTTGTTGGTT

>1311

TTTGCCAAAATCCTTTTTGAATCCATTTCCATTTCCAGGAAGTATCCTTTTTAGGGGTGA  
TGAATGACAAGTTTATAATCTCCTGGGCTCCTGGAAATCTGGTCTTTTGGAGAGAGGTT  
GTTGGTTGTGAAGATAGGAAG

>1312

TTTCCAGGAAGTATCCTTTTTAGGGGTGATGAATGACAAGTTTATAATCTCCTGGGCTCC  
TGGAAATCTGGTCTTTTGGAGAGAGGTTGTTGGTTGTGAAGATAGGAAGATGGCAGAA  
GGCTTTGTAGTGGTGAGGCCAG

>1313

CTTTTTAGGGGTGATGAATGACAAGTTTATAATCTCCTGGGCTCCTGGAAATCTGGTCTT  
TTGGAGAGAGGTTGTTGGTTGTGAAGATAGGAAGATGGCAGAAGGCTTTGTAGTGGTG  
AGGCCAGGTCTAGACCTAGCTC

>1314

GGCTCCTGGAAATCTGGTCTTTTGGAGAGAGGTTGTTGGTTGTGAAGATAGGAAGATG  
GCAGAAGGCTTTGTAGTGGTGAGGCCAGGTCTAGACCTAGCTCTGCGTTTTTCAGCTC  
TGTCACCATTGACATCGTTTTTTT

>1315

TCCTGGAAATCTGGTCTTTTGGAGAGAGGTTGTTGGTTGTGAAGATAGGAAGATGGCA  
GAAGGCTTTGTAGTGGTGAGGCCAGGTCTAGACCTAGCTCTGCGTTTTTCAGCTCTGTC  
ACCATTGACATCGTTTTTTTCAT

>1316

GTCTTTTGGAGAGAGGTTGTTGGTTGTGAAGATAGGAAGATGGCAGAAGGCTTTGTAG  
TGGTGAGGCCAGGTCTAGACCTAGCTCTGCGTTTTTCAGCTCTGTCACCATTGACATCG

TTTTTTTCATCGTAAGCCTTAAC

>1317

GTTGGTTGTGAAGATAGGAAGATGGCAGAAGGCTTTGTAGTGGTGAGGCCAGGTCTAG  
ACCTAGCTCTGCGTTTTTCAGCTCTGTCACCATTGACATCGTTTTTTTCATCGTAAGCCT  
TAACTTCTTCATTTTTTAAACT

>1318

AAGGCTTTGTAGTGGTGAGGCCAGGTCTAGACCTAGCTCTGCGTTTTTCAGCTCTGTCA  
CCATTGACATCGTTTTTTTCATCGTAAGCCTTAACTTCTTCATTTTTTAAACTAGGCACT  
TCAGTGAGCTCTTCTGGATT

>1319

TGGTGAGGCCAGGTCTAGACCTAGCTCTGCGTTTTTCAGCTCTGTCACCATTGACATCG  
TTTTTTTCATCGTAAGCCTTAACTTCTTCATTTTTTAAACTAGGCACTTCAGTGAGCTCT  
TTCTGGATTGTTGCGCTCTT

>1320

TCTGTCACCATTGACATCGTTTTTTTCATCGTAAGCCTTAACTTCTTCATTTTTTAAACTA  
GGCACTTCAGTGAGCTCTTCTGGATTGTTGCGCTCTTTAAAAAATTCTTTTATTCTTTG  
TGTACCCACTTATATCTTC

>1321

GTTTTTTTCATCGTAAGCCTTAACTTCTTCATTTTTTAAACTAGGCACTTCAGTGAGCTC  
TTTCTGGATTGTTGCGCTCTTTAAAAAATTCTTTTATTCTTTGTGTACCCACTTATATCTT  
CATGAAGTCCTTTTGGTTA

>1322

TTTTAAACTAGGCACTTCAGTGAGCTCTTCTGGATTGTTGCGCTCTTTAAAAAATTC  
TTTTATTCTTTGTGTACCCACTTATATCTTCATGAAGTCCTTTTGGTTAATTGAATTTGCT  
TGTTTTGGAATCTGGATTGG

>1323

CTCTTTCTGGATTGTTGCGCTCTTTAAAAAATTCTTTTATTCTTTGTGTACCCACTTATAT  
CTTCATGAAGTCCTTTTGGTTAATTGAATTTGCTGTTTTGGAATCTGGATTGGCAGTTC  
AGCCAGTTAAGTAGGGGGT

>1324

GATTGTTGCGCTCTTTAAAAAATTCTTTTATTCTTTGTGTACCCACTTATATCTTCATGAA  
GTCCTTTTGGTTAATTGAATTTGCTGTTTTGGAATCTGGATTGGCAGTTCAGCCAGTTA  
AGTAGGGGGTCAGTTTGAT

>1325

AAAAATCTTTTATTCTTTGTGTACCCACTTATATCTTCATGAAGTCCTTTTGGTTAATTG  
AATTTTGCTGTTTTGGAATCTGGATTGGCAGTTCAGCCAGTTAAGTAGGGGGTCAGTTT  
GATTTGATTCTGTGTGTTCT

>1326

GTACCCACTTATATCTTCATGAAGTCCTTTTGGTTAATTGAATTTGCTGTTTTGGAATCT  
GGATTGGCAGTTCAGCCAGTTAAGTAGGGGGTCAGTTTGATTGATTCTGTGTGTTCTG  
ACTTTTTTTTTTTTTTAA

>1327

TATATCTTCATGAAGTCCTTTTGGTTAATTGAATTTGCTGTTTTGGAATCTGGATTGGCA  
GTTTACCCAGTTAAGTAGGGGGTCAGTTTGATTGATTCTGTGTGTTCTGACTTTTTTTT

TTTTTTTAAATACTTTAAC

>1328

CTTCATGAAGTCCTTTTGGTTAATTGAATTTTGCTGTTTTGGAATCTGGATTGGCAGTTC  
AGCCAGTTAAGTAGGGGGTCAGTTTGATTGATTCTGTGTGTTCTGACTTTTTTTTTTTT  
TTAAATACTTTAACCTGCT

>1329

AATTTTGCTGTTTTGGAATCTGGATTGGCAGTTCAGCCAGTTAAGTAGGGGGTCAGTTT  
GATTTGATTCTGTGTGTTCTGACTTTTTTTTTTTTTTTTAAATACTTTAACCTGCTTAGGGT  
TACTGAGCCATCTGGGATCT

>1330

GGGGTCAGTTTGATTTGATTCTGTGTGTTCTGACTTTTTTTTTTTTTTTTAAATACTTTAAC  
CTGCTTAGGGTTACTGAGCCATCTGGGATCTAGACTGAACTCTTGGAACCTTTGAAGAT  
GATTCCTTTATTTTATTTT

>1331

TCTGGGATCTAGACTGAACTCTTGGAACCTTTGAAGATGATTCCTTTATTTTATTTTCA  
ATGGAGGAAAGTTGCCACTCTTTCATCTCAGTGAGAAGTCCCATTTTAATTTGCCATC  
ACTATTGGATGGAGCCGCTAA

>1332

TTGGAACCTTTTGAAGATGATTCCTTTATTTTATTTTCAATGGAGGAAAGTTGCCACTC  
TTTCATCTCAGTGAGAAGTCCCATTTTAATTTGCCATCACTATTGGATGGAGCCGCTAAT  
TGCTGGGAGGGAGAAAGCTA

>1333

TTTTGAAGATGATTCCTTTATTTTATTTTCAATGGAGGAAAGTTGCCACTCTTTCATC  
TCAGTGAGAAGTCCCATTTTAATTTGCCATCACTATTGGATGGAGCCGCTAATTGCTGG  
GAGGGAGAAAGCTATAGTTTA

>1334

GAGAAGTCCCATTTTAATTTGCCATCACTATTGGATGGAGCCGCTAATTGCTGGGAGGG  
AGAAAGCTATAGTTTAGCAACATGTTTTCTCCTGCTCGTTCTAGGAAAACCTATTATGAA  
TCTTTAAAATAGTGATTATCC

>1335

TTTAATTTGCCATCACTATTGGATGGAGCCGCTAATTGCTGGGAGGGAGAAAGCTATAG  
TTTAGCAACATGTTTTCTCCTGCTCGTTCTAGGAAAACCTATTATGAATCTTTAAAATAG  
TGATTATCCTAAACTGTTAAA

>1336

GAAAGCTATAGTTTAGCAACATGTTTTCTCCTGCTCGTTCTAGGAAAACCTATTATGAAT  
CTTTAAAATAGTGATTATCCTAAACTGTTAAAATCAAATTCTATTCACAGCTCTTTGATTT  
CTTGCTAATTCAGGAGAGA

>1337

CAACATGTTTTCTCCTGCTCGTTCTAGGAAAACCTATTATGAATCTTTAAAATAGTGATT  
ATCCTAAACTGTTAAAATCAAATTCTATTCACAGCTCTTTGATTTCTTGCTAATTCAGGA  
GAGAACTTTTCCAATCACT

>1338

CAGGAGAGAACTTTTCCAATCACTTTAATTTTTTTTATTAATTTAAAGCAAGCCCTGCT  
GAAAGCCCAAGTATATATGACTTAGAGTCTTACTAAATGAATACAGGTGTGCCTCAGTT



TGTCCATTGGAGGGTTTCTGA

>1339

CCAATCACTTTAATTTTTTTTATTAATTTAAAGCAAGCCCTGCTGAAAGCCCAAGTATAT  
ATGACTTAGAGTCTTACTAAATGAATACAGGTGTGCCTCAGTTTGTCCATTGGAGGGTT  
TCTGAATTTTCCATAACTAAA

>1340

TATTAATTTAAAGCAAGCCCTGCTGAAAGCCCAAGTATATATGACTTAGAGTCTTACTAA  
ATGAATACAGGTGTGCCTCAGTTTGTCCATTGGAGGGTTTCTGAATTTTCCATAACTAA  
AGATTTTCTATTCTGTTTTGG

>1341

TTAATTTAAAGCAAGCCCTGCTGAAAGCCCAAGTATATATGACTTAGAGTCTTACTAAAT  
GAATACAGGTGTGCCTCAGTTTGTCCATTGGAGGGTTTCTGAATTTTCCATAACTAAAG  
ATTTTCTATTCTGTTTTGGCT

>1342

AAGCCCAAGTATATATGACTTAGAGTCTTACTAAATGAATACAGGTGTGCCTCAGTTTGT  
CCATTGGAGGGTTTCTGAATTTTCCATAACTAAAGATTTTCTATTCTGTTTTGGCTGGGT  
GTGTGGGGTGAAAGCTCTTA

>1343

AATACAGGTGTGCCTCAGTTTGTCCATTGGAGGGTTTCTGAATTTTCCATAACTAAAGA  
TTTTCTATTCTGTTTTGGCTGGGTGTGTGGGGTGAAAGCTCTTACTCTCTGGCAGTTATT  
TAAGTAGTAAGAAATTTGCTA

>1344

GCCTCAGTTTGTCCATTGGAGGGTTTCTGAATTTTCCATAACTAAAGATTTTCTATTCTG  
TTTTGGCTGGGTGTGTGGGGTGAAAGCTCTTACTCTCTGGCAGTTATTTAAGTAGTAAG  
AAATTTGCTACAACCTCTTCCC

>1345

TTTCCATAACTAAAGATTTTCTATTCTGTTTTGGCTGGGTGTGTGGGGTGAAAGCTCTTA  
CTCTCTGGCAGTTATTTAAGTAGTAAGAAATTTGCTACAACCTCTTCCCCACCCCCACGT  
TTTACAGATAGGAAATGAGCA

>1346

CTAAAGATTTTCTATTCTGTTTTGGCTGGGTGTGTGGGGTGAAAGCTCTTACTCTCTGG  
CAGTTATTTAAGTAGTAAGAAATTTGCTACAACCTCTTCCCCACCCCCACGTTTACAGAT  
AGGAAATGAGCACTTTGACTG

>1347

AAGATTTTCTATTCTGTTTTGGCTGGGTGTGTGGGGTGAAAGCTCTTACTCTCTGGCAG  
TTATTTAAGTAGTAAGAAATTTGCTACAACCTCTTCCCCACCCCCACGTTTACAGATAGG  
AAATGAGCACTTTGACTGTCC

>1348

GTGAAAGCTCTTACTCTCTGGCAGTTATTTAAGTAGTAAGAAATTTGCTACAACCTCTT  
CCCACCCCCACGTTTACAGATAGGAAATGAGCACTTTGACTGTCCAGGTCAGACTTC  
TGATTTTGCTACTTACTAACTGT

>1349

AGTAGTAAGAAATTTGCTACAACCTCTTCCCCACCCCCACGTTTACAGATAGGAAATGA  
GCACTTTGACTGTCCAGGTCAGACTTCTGATTTTGCTACTTACTAACTGTGACAGTGGT

TGTGTTACTTAACTTCTGTGTG

>1350

AAGAAATTTGCTACAACCTCTTCCCCACCCCCACGTTTTACAGATAGGAAATGAGCACTT  
TGACTGTCCAGGTCAGACTTCTGATTTTGCTACTTACTAACTGTGACAGTGGTTGTGTT  
ACTTAACTTCTGTGTGCCTGTT

>1351

ACGTTTTACAGATAGGAAATGAGCACTTTGACTGTCCAGGTCAGACTTCTGATTTTGCT  
ACTTACTAACTGTGACAGTGGTTGTGTTACTTAACTTCTGTGTGCCTGTTTGCTCATTG  
TGAAACAGAAATAATAGTAGT

>1352

AGATAGGAAATGAGCACTTTGACTGTCCAGGTCAGACTTCTGATTTTGCTACTTACTAA  
CTGTGACAGTGGTTGTGTTACTTAACTTCTGTGTGCCTGTTTGCTCATTGTGAAACAG  
AAATAATAGTAGTACCTACTTC

>1353

TAGGAAATGAGCACTTTGACTGTCCAGGTCAGACTTCTGATTTTGCTACTTACTAACTG  
TGACAGTGGTTGTGTTACTTAACTTCTGTGTGCCTGTTTGCTCATTGTGAAACAGAAA  
TAATAGTAGTACCTACTTCATT

>1354

TGACTGTCCAGGTCAGACTTCTGATTTTGCTACTTACTAACTGTGACAGTGGTTGTGTT  
ACTTAACTTCTGTGTGCCTGTTTGCTCATTGTGAAACAGAAATAATAGTAGTACCTACT  
TCATTGGGTTGTTATAAGGAT

>1355

CTGATTTTGCTACTTACTAACTGTGACAGTGGTTGTGTTACTTAACTTCTGTGTGCCTGT  
TTGCTCATTGTGAAACAGAAATAATAGTAGTACCTACTTCATTGGGTTGTTATAAGGAT  
TCATCAGAAAATATTTATCC

>1356

CTGTGACAGTGGTTGTGTTACTTAACTTCTGTGTGCCTGTTTGCTCATTGTGAAACAG  
AAATAATAGTAGTACCTACTTCATTGGGTTGTTATAAGGATTCATCAGAAAATATTTATCC  
TGTGTGAGGAACGGTGGCAC

>1357

GTTACTTAACTTCTGTGTGCCTGTTTGCTCATTGTGAAACAGAAATAATAGTAGTACCT  
ACTTCATTGGGTTGTTATAAGGATTCATCAGAAAATATTTATCCTGTGTGAGGAACGGTG  
GCACATAGTAAGTGCTCCAT

>1358

ACTTAACTTCTGTGTGCCTGTTTGCTCATTGTGAAACAGAAATAATAGTAGTACCTACT  
TCATTGGGTTGTTATAAGGATTCATCAGAAAATATTTATCCTGTGTGAGGAACGGTGGC  
ACATAGTAAGTGCTCCATAAG

>1359

TGAAACAGAAATAATAGTAGTACCTACTTCATTGGGTTGTTATAAGGATTCATCAGAAA  
ATATTTATCCTGTGTGAGGAACGGTGGCACATAGTAAGTGCTCCATAAGTGTGTTGCTAG  
GGTATTTTCTTGTCATTGTGT

>1360

AATAGTAGTACCTACTTCATTGGGTTGTTATAAGGATTCATCAGAAAATATTTATCCTGTG  
TGAGGAACGGTGGCACATAGTAAGTGCTCCATAAGTGTGTTTGCTAGGGTATTTTCTTGT

CATTGTGTGAAGTAGGTCAT

>1361

CCTACTTCATTGGGTTGTTATAAGGATTCATCAGAAAATATTTATCCTGTGTGAGGAACG  
GTGGCACATAGTAAGTGCTCCATAAGTGTTTGCTAGGGTATTTTTCTTGTCATTGTGTGA  
AGTAGGTCATGCTAGCCATG

>1362

TGTTATAAGGATTCATCAGAAAATATTTATCCTGTGTGAGGAACGGTGGCACATAGTAA  
GTGCTCCATAAGTGTTTGCTAGGGTATTTTTCTTGTCATTGTGTGAAGTAGGTCATGCTA  
GCCATGCAGGGTGAAAAATGT

>1363

TATTTATCCTGTGTGAGGAACGGTGGCACATAGTAAGTGCTCCATAAGTGTTTGCTAGG  
GTATTTTTCTTGTCATTGTGTGAAGTAGGTCATGCTAGCCATGCAGGGTGAAAAATGTG  
TTCATGTTGGTCCAGATCCTGC

>1364

CTGTGTGAGGAACGGTGGCACATAGTAAGTGCTCCATAAGTGTTTGCTAGGGTATTTTT  
CTTGTCATTGTGTGAAGTAGGTCATGCTAGCCATGCAGGGTGAAAAATGTGTTTCATGTT  
GGTCCAGATCCTGCTTTCTCCC

>1365

TGAGGAACGGTGGCACATAGTAAGTGCTCCATAAGTGTTTGCTAGGGTATTTTTCTTG  
CATTGTGTGAAGTAGGTCATGCTAGCCATGCAGGGTGAAAAATGTGTTTCATGTTGGTCC  
AGATCCTGCTTTCTCCCTGAGA

>1366

GAACGGTGGCACATAGTAAGTGCTCCATAAGTGTTTGCTAGGGTATTTTTCTTGTCATTG  
TGTGAAGTAGGTCATGCTAGCCATGCAGGGTGAAAAATGTGTTTCATGTTGGTCCAGATC  
CTGCTTTCTCCCTGAGACCGT

>1367

GTGCTCCATAAGTGTTTGCTAGGGTATTTTTCTTGTCATTGTGTGAAGTAGGTCATGCTA  
GCCATGCAGGGTGAAAAATGTGTTTCATGTTGGTCCAGATCCTGCTTTCTCCCTGAGACC  
GTTCTTCCGCATAGGCGTCAA

>1368

GGGTATTTTTCTTGTCATTGTGTGAAGTAGGTCATGCTAGCCATGCAGGGTGAAAAATG  
TGTTTCATGTTGGTCCAGATCCTGCTTTCTCCCTGAGACCGTTCTTCCGCATAGGCGTCA  
ATCCGTACAGTGCTGTAAACT

>1369

AGGTCATGCTAGCCATGCAGGGTGAAAAATGTGTTTCATGTTGGTCCAGATCCTGCTTTC  
TCCCTGAGACCGTTCTTCCGCATAGGCGTCAATCCGTACAGTGCTGTAAACTGCTGCC  
TCGGGCACCTCATGTTTGGGGC

>1370

GCAGGGTGAAAAATGTGTTTCATGTTGGTCCAGATCCTGCTTTCTCCCTGAGACCGTTCT  
TCCGCATAGGCGTCAATCCGTACAGTGCTGTAAACTGCTGCCTCGGGCACCTCATGTT  
TGGGGCTGAGACATTGCTTCTG

>1371

CCTGAGACCGTTCTTCCGCATAGGCGTCAATCCGTACAGTGCTGTAAACTGCTGCCTC  
GGGCACCTCATGTTTGGGGCTGAGACATTGCTTCTGCGTCTTCCCCAGAAGCTGATCTC

TTGTACTGTGGTGGCCAGGGTA

>1372

TCAATCCGTACAGTGCTGTAAACTGCTGCCTCGGGCACCTCATGTTTGGGGCTGAGA  
CATTGCTTCTGCGTCTTCCCCAGAAGCTGATCTCTTGTACTGTGGTGGCCAGGGTACTC  
TTTGTCCCATTGACCTGAGGCCT

>1373

TGCTGCCTCGGGCACCTCATGTTTGGGGCTGAGACATTGCTTCTGCGTCTTCCCCAGAA  
GCTGATCTCTTGTACTGTGGTGGCCAGGGTACTCTTTGTCCCATTGACCTGAGGCCTGG  
TGAGTCATTCCAGTTCTCGTTT

>1374

CCTCGGGCACCTCATGTTTGGGGCTGAGACATTGCTTCTGCGTCTTCCCCAGAAGCTGA  
TCTCTTGTACTGTGGTGGCCAGGGTACTCTTTGTCCCATTGACCTGAGGCCTGGTGAGT  
CATTCCAGTTCTCGTTTAAATT

>1375

CATGTTTGGGGCTGAGACATTGCTTCTGCGTCTTCCCCAGAAGCTGATCTCTTGTACTG  
TGGTGGCCAGGGTACTCTTTGTCCCATTGACCTGAGGCCTGGTGAGTCATTCCAGTTCT  
CGTTTAAATTAGCCGGGCAGC

>1376

TCTTCCCCAGAAGCTGATCTCTTGTACTGTGGTGGCCAGGGTACTCTTTGTCCCATTGA  
CCTGAGGCCTGGTGAGTCATTCCAGTTCTCGTTTAAATTAGCCGGGCAGCGCTCCACT  
GCCATCGGGTCCAAATGCCGGG

>1377

CTGATCTCTTGTACTGTGGTGGCCAGGGTACTCTTTGTCCCATTGACCTGAGGCCTGGT  
GAGTCATTCCAGTTCTCGTTTAAATTAGCCGGGCAGCGCTCCACTGCCATCGGGTCCA  
AATGCCGGGGAGGCTCACTGAT

>1378

TCTTGTACTGTGGTGGCCAGGGTACTCTTTGTCCCATTGACCTGAGGCCTGGTGAGTCA  
TTCCAGTTCTCGTTTAAATTAGCCGGGCAGCGCTCCACTGCCATCGGGTCCAAATGCC  
GGGGAGGCTCACTGATGCGGTG

>1379

TGACCTGAGGCCTGGTGAGTCATTCCAGTTCTCGTTTAAATTAGCCGGGCAGCGCTCC  
ACTGCCATCGGGTCCAAATGCCGGGGAGGCTCACTGATGCGGTGTCCTGTTGCCTGTG  
CACGTGGCCAGGCGTGACATCA

>1380

CTCGTTTAAATTAGCCGGGCAGCGCTCCACTGCCATCGGGTCCAAATGCCGGGGAGG  
CTCACTGATGCGGTGTCCTGTTGCCTGTGCACGTGGCCAGGCGTGACATCACTGTGC  
TTATGAGAGAGATGAAGAGCACAG

>1381

CGTTTAAATTAGCCGGGCAGCGCTCCACTGCCATCGGGTCCAAATGCCGGGGAGGCT  
CACTGATGCGGTGTCCTGTTGCCTGTGCACGTGGCCAGGCGTGACATCACTGTGCTTA  
TGAGAGAGATGAAGAGCACAGAT

>1382

CTGCCATCGGGTCCAAATGCCGGGGAGGCTCACTGATGCGGTGTCCTGTTGCCTGTGC  
ACGTGGCCAGGCGTGACATCACTGTGCTTATGAGAGAGATGAAGAGCACAGATACCA

CCTTACTGATGGGGGTCTGGGGC

>1383

CCAAATGCCGGGGAGGCTCACTGATGCGGTGTCCTGTTGCCTGTGCACGTGGCCAGGC  
GTGCACATCACTGTGCTTATGAGAGAGATGAAGAGCACAGATACCACCTTACTGATGG  
GGGTCTGGGGCTGGGCTTGTGGG

>1384

GTGGCCAGGCGTGCACATCACTGTGCTTATGAGAGAGATGAAGAGCACAGATACCACC  
TACTGATGGGGGTCTGGGGCTGGGCTTGTGGGTGTTGGGGGTTCAGAGCTCCTTC  
CCTTTCCTGCCTGTCAGTGCAGGA

>1385

TCACTGTGCTTATGAGAGAGATGAAGAGCACAGATACCACCTTACTGATGGGGGTCT  
GGGGCTGGGCTTGTGGGTGTTGGGGGTTCAGAGCTCCTTCCCTTTCCTGCCTGTCAG  
TGCAGGATGCTTCTAAAATGTGGA

>1386

TGTGCTTATGAGAGAGATGAAGAGCACAGATACCACCTTACTGATGGGGGTCTGGGG  
CTGGGCTTGTGGGTGTTGGGGGTTCAGAGCTCCTTCCCTTTCCTGCCTGTCAGTGCA  
GGATGCTTCTAAAATGTGGACTCA

>1387

TACTGATGGGGGTCTGGGGCTGGGCTTGTGGGTGTTGGGGGTTCAGAGCTCCTTC  
CCTTTCCTGCCTGTCAGTGCAGGATGCTTCTAAAATGTGGACTCAGCAGACATTGTTTT  
GAGTGCTTGCTACATGTCAGATT

>1388

GGCTTGTGGGTGTTGGGGGTTCAGAGCTCCTTCCCTTTCCTGCCTGTCAGTGCAGGA  
TGCTTCTAAAATGTGGACTCAGCAGACATTGTTTTGAGTGCTTGCTACATGTCAGATTC  
TGTGCTAAGTGCCTCACAGCCA

>1389

GTTCCAGAGCTCCTTCCCTTTCCTGCCTGTCAGTGCAGGATGCTTCTAAAATGTGGACT  
CAGCAGACATTGTTTTGAGTGCTTGCTACATGTCAGATTCTGTGCTAAGTGCCTCACA  
GCCAGCATCTCTGTAAGACCTC

>1390

TCCTGCCTGTCAGTGCAGGATGCTTCTAAAATGTGGACTCAGCAGACATTGTTTTGAGT  
GCTTGCTACATGTCAGATTCTGTGCTAAGTGCCTCACAGCCAGCATCTCTGTAAGACC  
TCTAGCTGTCCTGTAAGGTGGG

>1391

CAGTGCAGGATGCTTCTAAAATGTGGACTCAGCAGACATTGTTTTGAGTGCTTGCTACA  
TGTCAGATTCTGTGCTAAGTGCCTCACAGCCAGCATCTCTGTAAGACCTCTAGCTGTC  
CTGTAAGGTGGGTATCAGTTTC

>1392

GGATGCTTCTAAAATGTGGACTCAGCAGACATTGTTTTGAGTGCTTGCTACATGTCAGA  
TTCTGTGCTAAGTGCCTCACAGCCAGCATCTCTGTAAGACCTCTAGCTGTCCTGTAAG  
GTGGGTATCAGTTTCACATTCT

>1393

AGCAGACATTGTTTTGAGTGCTTGCTACATGTCAGATTCTGTGCTAAGTGCCTCACAG  
CCAGCATCTCTGTAAGACCTCTAGCTGTCCTGTAAGGTGGGTATCAGTTTCACATTCTC

AGATGGGCGGAGAGAAGCCCAA

>1394

GAGTGCTTGCTACATGTCAGATTCTGTGCTAAGTGCACTCACAGCCAGCATCTCTGTAA  
GACCTCTAGCTGTCCTGTAAGGTGGGTATCAGTTTCACATTCTCAGATGGGCGGAGAG  
AAGCCCAAGAGGTTAGTGGACTT

>1395

TGTCAGATTCTGTGCTAAGTGCACTCACAGCCAGCATCTCTGTAAGACCTCTAGCTGTC  
CTGTAAGGTGGGTATCAGTTTCACATTCTCAGATGGGCGGAGAGAAGCCCAAGAGGTT  
AGTGGACTTTTCTCTAGTAAAGA

>1396

ATTCTGTGCTAAGTGCACTCACAGCCAGCATCTCTGTAAGACCTCTAGCTGTCCTGTAA  
GGTGGGTATCAGTTTCACATTCTCAGATGGGCGGAGAGAAGCCCAAGAGGTTAGTGGA  
CTTTTCTCTAGTAAAGAGTTGTA

>1397

AGACCTCTAGCTGTCCTGTAAGGTGGGTATCAGTTTCACATTCTCAGATGGGCGGAGA  
GAAGCCCAAGAGGTTAGTGGACTTTTCTCTAGTAAAGAGTTGTACAGGCCGGGCGCAG  
TGGCTCATGCCTGTAATCCCAGCA

>1398

AAGGTGGGTATCAGTTTCACATTCTCAGATGGGCGGAGAGAAGCCCAAGAGGTTAGTG  
GACTTTTCTCTAGTAAAGAGTTGTACAGGCCGGGCGCAGTGGCTCATGCCTGTAATCCC  
AGCACTTTGGGAGGCCGAGGCGG

>1399

GTATCAGTTTCACATTCTCAGATGGGCGGAGAGAAGCCCAAGAGGTTAGTGGACTTTT  
CTCTAGTAAAGAGTTGTACAGGCCGGGCGCAGTGGCTCATGCCTGTAATCCCAGCACT  
TTGGGAGGCCGAGGCCGGGCGGATC

>1400

AGATGGGCGGAGAGAAGCCCAAGAGGTTAGTGGACTTTTCTCTAGTAAAGAGTTGTAC  
AGGCCGGGCGCAGTGGCTCATGCCTGTAATCCCAGCACTTTGGGAGGCCGAGGCGGG  
CGGATCACGAGGTCAGGAGATCGAG

>1401

ACAGGCCGGGCGCAGTGGCTCATGCCTGTAATCCCAGCACTTTGGGAGGCCGAGGCG  
GGCGGATCACGAGGTCAGGAGATCGAGACCATCCTGGCTAACACAGTGAAACCCCGT  
CTCTACTAAAAATACAAAAAATTAGC

>1402

CCCAGCACTTTGGGAGGCCGAGGCCGGGCGGATCACGAGGTCAGGAGATCGAGACCAT  
CCTGGCTAACACAGTGAAACCCCGTCTCTACTAAAAATACAAAAAATTAGCCGGGCGT  
GGTGGGGGGCGCCTGTAGTCCCAGC

>1403

TGGGAGGCCGAGGCCGGGCGGATCACGAGGTCAGGAGATCGAGACCATCCTGGCTAAC  
ACAGTGAAACCCCGTCTCTACTAAAAATACAAAAAATTAGCCGGGCGTGGTGGGGGGC  
GCCTGTAGTCCCAGCTACTCGGGAG

>1404

GAGATCGAGACCATCCTGGCTAACACAGTGAAACCCCGTCTCTACTAAAAATACAAAA  
AATTAGCCGGGCGTGGTGGGGGGCGCCTGTAGTCCCAGCTACTCGGGAGGCTGAGGC

AGGAGAATGGCGTGAACCCGGGAGG

>1405

TGGCTAACACAGTGAAACCCCGTCTCTACTAAAAATACAAAAAATTAGCCGGGCGTGG  
TGGGGGGCGCCTGTAGTCCCAGCTACTCGGGAGGCTGAGGCAGGAGAATGGCGTGAA  
CCCGGGAGGCAGAGCTTGCAGTGAG

>1406

AAAATTAGCCGGGCGTGGTGGGGGGCGCCTGTAGTCCCAGCTACTCGGGAGGCTGAG  
GCAGGAGAATGGCGTGAACCCGGGAGGCAGAGCTTGCAGTGAGCCGAGATCATGCCA  
CTCACTACACTCCAGCCTGGGCAAAG

>1407

CGCCTGTAGTCCCAGCTACTCGGGAGGCTGAGGCAGGAGAATGGCGTGAACCCGGGA  
GGCAGAGCTTGCAGTGAGCCGAGATCATGCCACTCACTACACTCCAGCCTGGGCAA  
GGAGTGAGACTGTCTCAAAAAAAAAA

>1408

GAACCCGGGAGGCAGAGCTTGCAGTGAGCCGAGATCATGCCACTCACTACACTCCAG  
CCTGGGCAAAGGAGTGAGACTGTCTCAAAAAAAAAAAAAAAAAAAGAGTTGTAC  
CAGGATTTATGTTCAAGTCTTCTGGCT

>1409

GAGGCAGAGCTTGCAGTGAGCCGAGATCATGCCACTCACTACACTCCAGCCTGGGCA  
AAGGAGTGAGACTGTCTCAAAAAAAAAAAAAAAAAAAGAGTTGTACCAGGATTTA  
TGTTCAAGTCTTCTGGCTCCATGCTC

>1410

ATGCCACTCACTACACTCCAGCCTGGGCAAAGGAGTGAGACTGTCTCAAAAAAAAAA  
AAAAAAAAAAGAGTTGTACCAGGATTTATGTTCAAGTCTTCTGGCTCCATGCTCTCTG  
CAGCTGGGTGACCAGGGGGCTCAT

>1411

CCACTCACTACACTCCAGCCTGGGCAAAGGAGTGAGACTGTCTCAAAAAAAAAAAAA  
AAAAAAAAAAGAGTTGTACCAGGATTTATGTTCAAGTCTTCTGGCTCCATGCTCTCTGCAG  
CTGGGTGACCAGGGGGCTCATGGC

>1412

AAAAAAAAAAAAAAGAGTTGTACCAGGATTTATGTTCAAGTCTTCTGGCTCCATGCT  
CTCTGCAGCTGGGTGACCAGGGGGCTCATGGCTTCACCAGCTCTGGCCTCCTCAGTTC  
CTCTGGTGGCTTCTTGCGAGGAGG

>1413

CCATGCTCTCTGCAGCTGGGTGACCAGGGGGCTCATGGCTTCACCAGCTCTGGCCTCC  
TCAGTTCTCTGGTGGCTTCTTGCGAGGAGGAAGGTTACTGCAGAGGGTTCAGCTCTT  
TAGGGGCCCAGGCCGCATGGATCC

>1414

ACCAGGGGGCTCATGGCTTCACCAGCTCTGGCCTCCTCAGTTCCTCTGGTGGCTTCTTG  
CGAGGAGGAAGGTTACTGCAGAGGGTTCAGCTCTTTAGGGGCCCAGGCCGCATGGAT  
CCAAGGACTAGTACGTCATCTCTT

>1415

TGGCTTCACCAGCTCTGGCCTCCTCAGTTCCTCTGGTGGCTTCTTGCGAGGAGGAAGG  
TTACTGCAGAGGGTTCAGCTCTTTAGGGGCCCAGGCCGCATGGATCCAAGGACTAGTA

CGTCATCTCTTACCAACACAGAGA

>1416

TTGCGAGGAGGAAGGTTACTGCAGAGGGTTCAGCTCTTTAGGGGGCCCAGGCCGCATG  
GATCCAAGGACTAGTACGTCATCTCTTACCAACACAGAGAGATCAGCTTCTAGTGATAG  
AGGCCTTTTATGCTGACTTGAAAA

>1417

GAGGAGGAAGGTTACTGCAGAGGGTTCAGCTCTTTAGGGGGCCCAGGCCGCATGGATC  
CAAGGACTAGTACGTCATCTCTTACCAACACAGAGAGATCAGCTTCTAGTGATAGAGG  
CCTTTTATGCTGACTTGAAAAACAG

>1418

AGGGGGCCCAGGCCGCATGGATCCAAGGACTAGTACGTCATCTCTTACCAACACAGAGA  
GATCAGCTTCTAGTGATAGAGGCCTTTTATGCTGACTTGAAAAACAGAAAAAGAGAGA  
AAAAAGAAACCCATTTACAAAAAT

>1419

TTATGCTGACTTGAAAAACAGAAAAAGAGAGAAAAAAGAAACCCATTTACAAAAATA  
AAAATCCCATGCTGTTAATTTTCATGCCAGCATAATCAGAAATTCCCCTTTCTACTGTTTC  
CCCTTAAAAGCCCCGGTGTCTT

>1420

CCATTTACAAAAATAAAAATCCCATGCTGTTAATTTTCATGCCAGCATAATCAGAAATTCC  
CCTTTCTACTGTTTCCCCTTAAAAGCCCCGGTGTCTTATTATGCTGGTGCAGTCTGGAA  
AAACTATGGTTGGGTTTTGC

>1421

CCCATGCTGTTAATTTTCATGCCAGCATAATCAGAAATTCCCCTTTCTACTGTTTCCCCTT  
AAAAGCCCCGGTGTCTTATTATGCTGGTGCAGTCTGGAAAACTATGGTTGGGTTTTG  
CCTACGTGAGGCTTATCTCTG

>1422

ATGCCAGCATAATCAGAAATTCCCCTTTCTACTGTTTCCCCTTAAAAGCCCCGGTGTCTT  
TATTATGCTGGTGCAGTCTGGAAAACTATGGTTGGGTTTTGCCTACGTGAGGCTTATCT  
CTGCAGCTGCAAGGAGGGGA

>1423

CCCCTTTCTACTGTTTCCCCTTAAAAGCCCCGGTGTCTTATTATGCTGGTGCAGTCTGG  
AAAACTATGGTTGGGTTTTGCCTACGTGAGGCTTATCTCTGCAGCTGCAAGGAGGGG  
ATCCGGTACTTTATTGTCAGCA

>1424

TTCTACTGTTTCCCCTTAAAAGCCCCGGTGTCTTATTATGCTGGTGCAGTCTGGAAAA  
ACTATGGTTGGGTTTTGCCTACGTGAGGCTTATCTCTGCAGCTGCAAGGAGGGGATCCG  
GTACTTTATTGTCAGCATGGAA

>1425

CCCCTTAAAAGCCCCGGTGTCTTATTATGCTGGTGCAGTCTGGAAAACTATGGTTGG  
GTTTTGCCTACGTGAGGCTTATCTCTGCAGCTGCAAGGAGGGGATCCGGTACTTTATTG  
TCAGCATGGAACTTCCGCTAA

>1426

AGTCTGGAAAACTATGGTTGGGTTTTGCCTACGTGAGGCTTATCTCTGCAGCTGCAAG  
GAGGGGATCCGGTACTTTATTGTCAGCATGGAACTTCCGCTAAATACTTAGAAAAACC



TTAATTCTAAATTCCTAGCTCA

>1427

AACTATGGTTGGGTTTTGCCTACGTGAGGCTTATCTCTGCAGCTGCAAGGAGGGGATCC  
GGTACTTTATTGTGTCAGCATGGAACTTCCGCTAAATACTTAGAAAAACCTTAATTCTAAA  
TTCCTAGCTCACTTTCAACTG

>1428

TGTCAGCATGGAACTTCCGCTAAATACTTAGAAAAACCTTAATTCTAAATTCCTAGCT  
CACTTTCAACTGTGTCCTCGGGACCTGATTTTCTTCGGTGTGAACAGATTGTGTTTCAGC  
ATTGCAGTAGAAAGGGTCCAAG

>1429

TCAGCATGGAACTTCCGCTAAATACTTAGAAAAACCTTAATTCTAAATTCCTAGCTCA  
CTTTCAACTGTGTCCTCGGGACCTGATTTTCTTCGGTGTGAACAGATTGTGTTTCAGCAT  
TGCAGTAGAAAGGGTCCAAGT

>1430

ACTTAGAAAAACCTTAATTCTAAATTCCTAGCTCACTTTCAACTGTGTCCTCGGGACCT  
GATTTTCTTCGGTGTGAACAGATTGTGTTTCAGCATTGCAGTAGAAAGGGTCCAAGTTA  
GGTAAGAGAAAGGACTTCCTGAG

>1431

TTAATTCTAAATTCCTAGCTCACTTTCAACTGTGTCCTCGGGACCTGATTTTCTTCGGTG  
TGAACAGATTGTGTTTCAGCATTGCAGTAGAAAGGGTCCAAGTTAGGTAAGAGAAAGG  
ACTTCCTGAGACACTGGGGTGTT

>1432

AATTCCTAAATTCCTAGCTCACTTTCAACTGTGTCCTCGGGACCTGATTTTCTTCGGTGTG  
AACAGATTGTGTTTCAGCATTGCAGTAGAAAGGGTCCAAGTTAGGTAAGAGAAAGGAC  
TTCCTGAGACACTGGGGTGTTAC

>1433

TAGCTCACTTTCAACTGTGTCCTCGGGACCTGATTTTCTTCGGTGTGAACAGATTGTGT  
TCAGCATTGCAGTAGAAAGGGTCCAAGTTAGGTAAGAGAAAGGACTTCCTGAGACAC  
TGGGGTGTTACTGAGAAAGTTGTT

>1434

TTCAACTGTGTCCTCGGGACCTGATTTTCTTCGGTGTGAACAGATTGTGTTTCAGCATTG  
CAGTAGAAAGGGTCCAAGTTAGGTAAGAGAAAGGACTTCCTGAGACACTGGGGTGTT  
ACTGAGAAAGTTGTTAGAAGACTG

>1435

AGATTGTGTTTCAGCATTGCAGTAGAAAGGGTCCAAGTTAGGTAAGAGAAAGGACTTCC  
TGAGACACTGGGGTGTTACTGAGAAAGTTGTTAGAAGACTGTCACAGACATTTTGATG  
AAGGGGGGACATTCTGGGCCATT

>1436

ATTGTGTTTCAGCATTGCAGTAGAAAGGGTCCAAGTTAGGTAAGAGAAAGGACTTCCTG  
AGACACTGGGGTGTTACTGAGAAAGTTGTTAGAAGACTGTCACAGACATTTTGATGAA  
GGGGGGACATTCTGGGCCATTTGA

>1437

ATTGCAGTAGAAAGGGTCCAAGTTAGGTAAGAGAAAGGACTTCCTGAGACACTGGGG  
TGTTACTGAGAAAGTTGTTAGAAGACTGTCACAGACATTTTGATGAAGGGGGGACATT

CTGGGCCATTTGAAGTGGTTTTTAG

>1438

TTACTGAGAAAGTTGTTAGAAGACTGTCACAGACATTTTGATGAAGGGGGGACATTCT  
GGGCCATTTGAAGTGGTTTTTAGAGTTCTTTCCTCTTTAGGGCCATTCGGTTCCCCCAG  
AAATAAGAAGAAAAGACATATAC

>1439

CTGAGAAAGTTGTTAGAAGACTGTCACAGACATTTTGATGAAGGGGGGACATTCTGGG  
CCATTTGAAGTGGTTTTTAGAGTTCTTTCCTCTTTAGGGCCATTCGGTTCCCCCAGAAAT  
AAGAAGAAAAGACATATACACG

>1440

TTGATGAAGGGGGGACATTCTGGGCCATTTGAAGTGGTTTTTAGAGTTCTTTCCTCTTT  
AGGGCCATTCGGTTCCCCCAGAAATAAGAAGAAAAGACATATACACGCACATAAACCA  
CCACCACCAGGCTTGCTGAGAAC

>1441

TCCCCCAGAAATAAGAAGAAAAGACATATACACGCACATAAACACCACCACCAGGCT  
TGCTGAGAACAAGTCAAATGTGCCACCAAACCATCGTCTTAGTGAGATGGGGTGGC  
ACTGCAGGGGCAGAAAGACTGACG

>1442

GAAATAAGAAGAAAAGACATATACACGCACATAAACACCACCACCAGGCTTGCTGAG  
AACAAGTCAAATGTGCCACCAAACCATCGTCTTAGTGAGATGGGGTGGCACTGCAG  
GGGCAGAAAGACTGACGTCTGATG

>1443

ACATATACACGCACATAAACACCACCACCAGGCTTGCTGAGAACAAGTCAAATGTGC  
CACCAAACCATCGTCTTAGTGAGATGGGGTGGCACTGCAGGGGCAGAAAGACTGA  
CGTCTGATGGACTTGGGTTTGAATA

>1444

AGTCAAATGTGCCACCAAACCATCGTCTTAGTGAGATGGGGTGGCACTGCAGGGGC  
AGAAAGACTGACGTCTGATGGACTTGGGTTTGAATACTAGTGCTCCATGGTGAATTTG  
GGCAAATGACTTCACCTCTGTGAA

>1445

CAAACCATCGTCTTAGTGAGATGGGGTGGCACTGCAGGGGCAGAAAGACTGACGT  
CTGATGGACTTGGGTTTGAATACTAGTGCTCCATGGTGAATTTGGGCAAATGACTTCAC  
CTCTGTGAAGCAGCAGTATCCTCT

>1446

ATGGGGTGGCACTGCAGGGGCAGAAAGACTGACGTCTGATGGACTTGGGTTTGAATAC  
TAGTGCTCCATGGTGAATTTGGGCAAATGACTTCACCTCTGTGAAGCAGCAGTATCCTC  
TTCTGTGAAGTGAGGTTAGCCCC

>1447

CTGACGTCTGATGGACTTGGGTTTGAATACTAGTGCTCCATGGTGAATTTGGGCAAATG  
ACTTCACCTCTGTGAAGCAGCAGTATCCTCTTCTGTGAAGTGAGGTTAGCCCCTACCTC  
TCAATGTGGTTTTTAAAGTATG

>1448

TGGACTTGGGTTTGAATACTAGTGCTCCATGGTGAATTTGGGCAAATGACTTCACCTCT  
GTGAAGCAGCAGTATCCTCTTCTGTGAAGTGAGGTTAGCCCCTACCTCTCAATGTGGTT

TTTAAAGTATGTTAATGAGATC

>1449

CAAATGACTTCACCTCTGTGAAGCAGCAGTATCCTCTTCTGTGAAGTGAGGTTAGCCC  
CTACCTCTCAATGTGGTTTTTTAAAGTATGTTAATGAGATCACTTGTAACCTAAAGCACAC  
AGAGTGTGAGGCCACCTCCCTA

>1450

ATGACTTCACCTCTGTGAAGCAGCAGTATCCTCTTCTGTGAAGTGAGGTTAGCCCCCTAC  
CTCTCAATGTGGTTTTTTAAAGTATGTTAATGAGATCACTTGTAACCTAAAGCACACAGA  
GTGTGAGGCCACCTCCCTACTT

>1451

CCTCTTCTGTGAAGTGAGGTTAGCCCCCTACCTCTCAATGTGGTTTTTTAAAGTATGTTAAT  
GAGATCACTTGTAACCTAAAGCACACAGAGTGTGAGGCCACCTCCCTACTTCCTGCTT  
CTCTCATGACCCCAGCCTGACA

>1452

TTAGCCCCCTACCTCTCAATGTGGTTTTTTAAAGTATGTTAATGAGATCACTTGTAACCTAA  
AGCACACAGAGTGTGAGGCCACCTCCCTACTTCCTGCTTCTCTCATGACCCCAGCCTG  
ACAAGGGAGCCGCTGAGCCCCC

>1453

AGCCCCCTACCTCTCAATGTGGTTTTTTAAAGTATGTTAATGAGATCACTTGTAACCTAAAG  
CACACAGAGTGTGAGGCCACCTCCCTACTTCCTGCTTCTCTCATGACCCCAGCCTGAC  
AAGGGAGCCGCTGAGCCCCCTG

>1454

TACTTCCTGCTTCTCTCATGACCCCAGCCTGACAAGGGAGCCGCTGAGCCCCCTGCCA  
CCCTCACCCGGCGTTGTGCTCTAAGTGGATTAGCTCAGCGTTGTGATCTTAATGCCATT  
AGGCCTGTTGGCACGGCTCTCCT

>1455

TTCTGCTTCTCTCATGACCCCAGCCTGACAAGGGAGCCGCTGAGCCCCCTGCCACCC  
TCACCCGGCGTTGTGCTCTAAGTGGATTAGCTCAGCGTTGTGATCTTAATGCCATTAGG  
CCTGTTGGCACGGCTCTCCTTGC

>1456

GACAAGGGAGCCGCTGAGCCCCCTGCCACCCTCACCCGGCGTTGTGCTCTAAGTGGAT  
TAGCTCAGCGTTGTGATCTTAATGCCATTAGGCCTGTTGGCACGGCTCTCCTTGCCATA  
GTGAGAAGCAGATGTGGCCGACC

>1457

TGCCACCCTCACCCGGCGTTGTGCTCTAAGTGGATTAGCTCAGCGTTGTGATCTTAATG  
CCATTAGGCCTGTTGGCACGGCTCTCCTTGCCATAGTGAGAAGCAGATGTGGCCGACC  
ATAATGGCCCTTAGCGTGATCCA

>1458

TCTAAGTGGATTAGCTCAGCGTTGTGATCTTAATGCCATTAGGCCTGTTGGCACGGCTC  
TCCTTGCCATAGTGAGAAGCAGATGTGGCCGACCATAATGGCCCTTAGCGTGATCCATC  
GGGCCCACAGTGCTGGGGCAAC

>1459

GCTCAGCGTTGTGATCTTAATGCCATTAGGCCTGTTGGCACGGCTCTCCTTGCCATAGT  
GAGAAGCAGATGTGGCCGACCATAATGGCCCTTAGCGTGATCCATCGGGCCCACAGTG

CTGGGGCAACCATATTAGTGTT

>1460

TTAGGCCTGTTGGCACGGCTCTCCTTGCCATAGTGAGAAGCAGATGTGGCCGACCATAA  
TGGCCCTTAGCGTGATCCATCGGGCCCACAGTGCTGGGGCAACCATATTAGTGTTAAT  
TTGGGGGAGCTTTTTATGGTAG

>1461

TCTCCTTGCCATAGTGAGAAGCAGATGTGGCCGACCATAATGGCCCTTAGCGTGATCCA  
TCGGGGCCCACAGTGCTGGGGCAACCATATTAGTGTTAATTTGGGGGAGCTTTTTATGG  
TAGCTGGGGGAAATGTGGAGGG

>1462

CAGATGTGGCCGACCATAATGGCCCTTAGCGTGATCCATCGGGCCCACAGTGCTGGGG  
CAACCATATTAGTGTTAATTTGGGGGAGCTTTTTATGGTAGCTGGGGGAAATGTGGAG  
GGATTGTTGGAAATTTATTTAAG

>1463

GATGTGGCCGACCATAATGGCCCTTAGCGTGATCCATCGGGCCCACAGTGCTGGGGCA  
ACCATTATTAGTGTTAATTTGGGGGAGCTTTTTATGGTAGCTGGGGGAAATGTGGAGGG  
ATTGTTGGAAATTTATTTAAGCT

>1464

TAGCGTGATCCATCGGGCCCACAGTGCTGGGGCAACCATATTAGTGTTAATTTGGGGG  
AGCTTTTTATGGTAGCTGGGGGAAATGTGGAGGGATTGTTGGAAATTTATTTAAGCTGT  
TCAGCAGGTTAGGTGCTGCTGG

>1465

GTTAATTTGGGGGAGCTTTTTATGGTAGCTGGGGGAAATGTGGAGGGATTGTTGGAAAT  
TTATTTAAGCTGTTTCAGCAGGTTAGGTGCTGCTGGGGTCTACTATGGCAAACCCCTCAG  
CTCCCCCAACCCATCTCTTTAA

>1466

GGGGAGCTTTTTATGGTAGCTGGGGGAAATGTGGAGGGATTGTTGGAAATTTATTTAAG  
CTGTTTCAGCAGGTTAGGTGCTGCTGGGGTCTACTATGGCAAACCCCTCAGCTCCCCCA  
ACCCATCTCTTTAAGGAACGTCC

>1467

GCAGGTTAGGTGCTGCTGGGGTCTACTATGGCAAACCCCTCAGCTCCCCCAACCCATC  
TCTTTAAGGAACGTCCCTCCCCAACACCGAAGCCCAGGCCTGATTACTTCCAGAGTTG  
GAGAGACAACCTTAGCAGGCTCTTG

>1468

GCTCCCCCAACCCATCTCTTTAAGGAACGTCCCTCCCCAACACCGAAGCCCAGGCCTG  
ATTACTTCCAGAGTTGGAGAGACAACCTTAGCAGGCTCTTGTTTCTTGCCGATGTACCTT  
ATTAGTAGCACCTGGCATCATAA

>1469

CGTCCCTCCCCAACACCGAAGCCCAGGCCTGATTACTTCCAGAGTTGGAGAGACAACCT  
TAGCAGGCTCTTGTTTCTTGCCGATGTACCTTATTAGTAGCACCTGGCATCATAACCCAC  
TAATGGGAACCAAGTGCTCTCCT

>1470

AGGCCTGATTACTTCCAGAGTTGGAGAGACAACCTTAGCAGGCTCTTGTTTCTTGCCGAT  
GTACCTTATTAGTAGCACCTGGCATCATAACCCACTAATGGGAACCAAGTGCTCTCCTCC

TGCGTGGCCAGTGACAAGTAGC

>1471

GCAGGCTCTTGTTCCTTGCCGATGTACCTTATTAGTAGCACCTGGCATCATAACCCACTA  
ATGGGAACCAGTGCTCTCCTCCTGCGTGGCCAGTGACAAGTAGCCCTGTCAGCCGGAG  
CTCGCCGTGCGAGGAAGTTCCT

>1472

TTGCCGATGTACCTTATTAGTAGCACCTGGCATCATAACCCACTAATGGGAACCAGTG  
TCTCCTCCTGCGTGGCCAGTGACAAGTAGCCCTGTCAGCCGGAGCTCGCCGTGCGAGG  
AAGTTCCTATTAGCTTTATGGTC

>1473

TGTACCTTATTAGTAGCACCTGGCATCATAACCCACTAATGGGAACCAGTGCTCTCCTC  
CTGCGTGGCCAGTGACAAGTAGCCCTGTCAGCCGGAGCTCGCCGTGCGAGGAAGTTC  
CTATTAGCTTTATGGTCAGGAGAA

>1474

TATTAGTAGCACCTGGCATCATAACCCACTAATGGGAACCAGTGCTCTCCTCCTGCGTG  
GCCAGTGACAAGTAGCCCTGTCAGCCGGAGCTCGCCGTGCGAGGAAGTTCCTATTAGC  
TTTATGGTCAGGAGAACTTGTC

>1475

GCACCTGGCATCATAACCCACTAATGGGAACCAGTGCTCTCCTCCTGCGTGGCCAGTG  
ACAAGTAGCCCTGTCAGCCGGAGCTCGCCGTGCGAGGAAGTTCCTATTAGCTTTATGG  
TCAGGAGAACTTGTCCTGTTTCAGG

>1476

GAACCAGTGCTCTCCTCCTGCGTGGCCAGTGACAAGTAGCCCTGTCAGCCGGAGCTCG  
CCGTGCGAGGAAGTTCCTATTAGCTTTATGGTCAGGAGAACTTGTCCTGTTTCAGGAAAT  
GAATGTTGCCGCTAAAGGTCCGC

>1477

TGCGTGGCCAGTGACAAGTAGCCCTGTCAGCCGGAGCTCGCCGTGCGAGGAAGTTC  
TATTAGCTTTATGGTCAGGAGAACTTGTCCTGTTTCAGGAAATGAATGTTGCCGCTAAAG  
GTCCGCGGCCCTGACCCTGGCGGC

>1478

ACAAGTAGCCCTGTCAGCCGGAGCTCGCCGTGCGAGGAAGTTCCTATTAGCTTTATGG  
TCAGGAGAACTTGTCCTGTTTCAGGAAATGAATGTTGCCGCTAAAGGTCCGCGGCCCTG  
ACCCTGGCGGCATAACCTGTGCGG

>1479

GAGCTCGCCGTGCGAGGAAGTTCCTATTAGCTTTATGGTCAGGAGAACTTGTCCTGTT  
AGGAAATGAATGTTGCCGCTAAAGGTCCGCGGCCCTGACCCTGGCGGCATAACCTGTG  
CGGGCCGGGAGACCCTGTGCAG

>1480

GAACCTGTCCTGTTTCAGGAAATGAATGTTGCCGCTAAAGGTCCGCGGCCCTGACCCTG  
GCGGCATAACCTGTGCGGGCCGGGGAGACCCTGTGCAGGATGCTTGGGATTTCAGCCC  
CTCTCTGGTTCTTGTCATATGTAA

>1481

ATGAATGTTGCCGCTAAAGGTCCGCGGCCCTGACCCTGGCGGCATAACCTGTGCGGGC  
CGGGGAGACCCTGTGCAGGATGCTTGGGATTTCAGCCCCTCTCTGGTTCTTGTCATATG

TAAAGAGGGAATCATTGTGGTAT

>1482

CCCTGGCGGCATAACCTGTGCGGGCCGGGGAGACCCTGTGCAGGATGCTTGGGATTTC  
AGCCCCCTCTCTGGTTCTTGTGCATATGTAAAGAGGGAATCATTGTGGTATGTTGCAGCCTT  
GAACTTTTGATTTATGCAGTGA

>1483

CGGCATAACCTGTGCGGGCCGGGGAGACCCTGTGCAGGATGCTTGGGATTTTCAGCCCC  
TCTCTGGTTCTTGTGCATATGTAAAGAGGGAATCATTGTGGTATGTTGCAGCCTTGAACCTT  
TTGATTTATGCAGTGAGGGCGA

>1484

AGACCCTGTGCAGGATGCTTGGGATTTTCAGCCCCCTCTCTGGTTCTTGTGCATATGTAAAG  
AGGGAATCATTGTGGTATGTTGCAGCCTTGAACCTTTTGATTTATGCAGTGAGGGCGACT  
TAACCGTTTCCATGCCTGGACG

>1485

TCTGGTTCTTGTGCATATGTAAAGAGGGAATCATTGTGGTATGTTGCAGCCTTGAACCTTT  
GATTTATGCAGTGAGGGCGACTTAACCGTTTCCATGCCTGGACGGCTGTGCAGTGACA  
GAGCCGTGTTGTGAGCGTATGT

>1486

GTAAAGAGGGAATCATTGTGGTATGTTGCAGCCTTGAACCTTTTGATTTATGCAGTGAGG  
GCGACTTAACCGTTTCCATGCCTGGACGGCTGTGCAGTGACAGAGCCGTGTTGTGAGC  
GTATGTGCCTAGGTACATGTGTG

>1487

TTGCAGCCTTGAACCTTTTGATTTATGCAGTGAGGGCGACTTAACCGTTTCCATGCCTGG  
ACGGCTGTGCAGTGACAGAGCCGTGTTGTGAGCGTATGTGCCTAGGTACATGTGTGTG  
TGGGGTGGTCAAGGGGAAGGAGA

>1488

AACTTTTGATTTATGCAGTGAGGGCGACTTAACCGTTTCCATGCCTGGACGGCTGTGCA  
GTGACAGAGCCGTGTTGTGAGCGTATGTGCCTAGGTACATGTGTGTGTGGGGTGGTCA  
AGGGGAAGGAGAGACCCCCACGT

>1489

TTGATTTATGCAGTGAGGGCGACTTAACCGTTTCCATGCCTGGACGGCTGTGCAGTGAC  
AGAGCCGTGTTGTGAGCGTATGTGCCTAGGTACATGTGTGTGTGGGGTGGTCAAGGGG  
AAGGAGAGACCCCCACGTGCTAG

>1490

TAACCGTTTCCATGCCTGGACGGCTGTGCAGTGACAGAGCCGTGTTGTGAGCGTATGT  
GCCTAGGTACATGTGTGTGTGGGGTGGTCAAGGGGAAGGAGAGACCCCCACGTGCTA  
GCAGGGGCTGTTGCTGGGAGCGGGT

>1491

CCGTGTTGTGAGCGTATGTGCCTAGGTACATGTGTGTGTGGGGTGGTCAAGGGGAAGG  
AGAGACCCCCACGTGCTAGCAGGGGCTGTTGCTGGGAGCGGGTGGATTTTCATGGGAG  
GATTCCTTTTCTTTTTTCTTTTTCT

>1492

ATGTGCCTAGGTACATGTGTGTGTGGGGTGGTCAAGGGGAAGGAGAGACCCCCACGT  
GCTAGCAGGGGCTGTTGCTGGGAGCGGGTGGATTTTCATGGGAGGATTCCTTTTCTTTTT

TCTTTTTCTTGCATTCTTGCAGCA

>1493

ATTTCATGGGAGGATTCCTTTTCTTTTTTCTTTTTCTTGCATTCTTGCAGCATCTAAATTT  
CCTGCGATTGTTGGCTGCAAAGTGGTAAGAAGCTGGAGAGCATTGTGTCTGGAATTGA  
ACCTGGGTTCGAATTAATCTT

>1494

GATTCCTTTTCTTTTTTCTTTTTCTTGCATTCTTGCAGCATCTAAATTTCTGCGATTGTT  
GGCTGCAAAGTGGTAAGAAGCTGGAGAGCATTGTGTCTGGAATTGAACCTGGGTTCG  
AATTAATCTTCTGTCTCTTAGA

>1495

CTTGCATTCTTGCAGCATCTAAATTTCTGCGATTGTTGGCTGCAAAGTGGTAAGAAGC  
TGGAGAGCATTGTGTCTGGAATTGAACCTGGGTTCGAATTAATCTTCTGTCTCTTAGAG  
GCTGTGTGACCGTGGCAAGATT

>1496

AAATTTCTGCGATTGTTGGCTGCAAAGTGGTAAGAAGCTGGAGAGCATTGTGTCTGG  
AATTGAACCTGGGTTCGAATTAATCTTCTGTCTCTTAGAGGCTGTGTGACCGTGGCAAG  
ATTCCTCACCCTCACTTCCTCA

>1497

TGGCTGCAAAGTGGTAAGAAGCTGGAGAGCATTGTGTCTGGAATTGAACCTGGGTTCG  
AATTAATCTTCTGTCTCTTAGAGGCTGTGTGACCGTGGCAAGATTCCTCACCCTCACT  
TCCTCATCTGTGAGATGAAGTTA

>1498

TAAGAAGCTGGAGAGCATTGTGTCTGGAATTGAACCTGGGTTCGAATTAATCTTCTGTC  
TCTTAGAGGCTGTGTGACCGTGGCAAGATTCCTCACCCTCACTTCCTCATCTGTGAGA  
TGAAGTTAATAACTTCTGATTC

>1499

CGAATTAATCTTCTGTCTCTTAGAGGCTGTGTGACCGTGGCAAGATTCCTCACCCTCA  
CTTCCTCATCTGTGAGATGAAGTTAATAACTTCTGATTCATACTGGTGGTAGAGCAGTG  
TTGTTAAGTAGGTGATGTATAG

>1500

TTCTGTCTCTTAGAGGCTGTGTGACCGTGGCAAGATTCCTCACCCTCACTTCCTCATC  
TGTGAGATGAAGTTAATAACTTCTGATTCATACTGGTGGTAGAGCAGTGTTGTTAAGTA  
GGTGATGTATAGAGAATACATG

>1501

CCGTGGCAAGATTCCTCACCCTCACTTCCTCATCTGTGAGATGAAGTTAATAACTTCT  
GATTCATACTGGTGGTAGAGCAGTGTTGTTAAGTAGGTGATGTATAGAGAATACATGGC  
CCAGCGTCCGGCCAGTGGTGTG

>1502

CCTCACCCTCACTTCCTCATCTGTGAGATGAAGTTAATAACTTCTGATTCATACTGGTG  
GTAGAGCAGTGTTGTTAAGTAGGTGATGTATAGAGAATACATGGCCCAGCGTCCGGCC  
AGTGGTGTGGCCTCAGGTTGTA

>1503

CACCCTCACTTCCTCATCTGTGAGATGAAGTTAATAACTTCTGATTCATACTGGTGGTA  
GAGCAGTGTTGTTAAGTAGGTGATGTATAGAGAATACATGGCCCAGCGTCCGGCCAGT

GGTGTGGCCTCAGGTTGTATAC

>1504

CTCACTTCCTCATCTGTGAGATGAAGTTAATAACTTCTGATTCATACTGGTGGTAGAGC  
AGTGTTGTTAAGTAGGTGATGTATAGAGAATACATGGCCCAGCGTCCGGCCAGTGGTGT  
GGCCTCAGGTTGTATACTTGAA

>1505

TCATCTGTGAGATGAAGTTAATAACTTCTGATTCATACTGGTGGTAGAGCAGTGTTGTTA  
AGTAGGTGATGTATAGAGAATACATGGCCCAGCGTCCGGCCAGTGGTGTGGCCTCAGG  
TTGTATACTTGAAAGGATGTGT

>1506

ACTTCTGATTCATACTGGTGGTAGAGCAGTGTTGTTAAGTAGGTGATGTATAGAGAATA  
CATGGCCCAGCGTCCGGCCAGTGGTGTGGCCTCAGGTTGTATACTTGAAAGGATGTGTA  
TACTTCAGTATTTTTTCCATTG

>1507

AGCAGTGTTGTTAAGTAGGTGATGTATAGAGAATACATGGCCCAGCGTCCGGCCAGTG  
GTGTGGCCTCAGGTTGTATACTTGAAAGGATGTGTATACTTCAGTATTTTTTCCATTGTA  
AAATTAAGGGTTTTTTTTCTTT

>1508

AGTGTTGTTAAGTAGGTGATGTATAGAGAATACATGGCCCAGCGTCCGGCCAGTGGTGT  
GGCCTCAGGTTGTATACTTGAAAGGATGTGTATACTTCAGTATTTTTTCCATTGTAAAT  
TAAGGGTTTTTTTTCTTTTTT

>1509

TGATGTATAGAGAATACATGGCCCAGCGTCCGGCCAGTGGTGTGGCCTCAGGTTGTATA  
CTTGAAAGGATGTGTATACTTCAGTATTTTTTCCATTGTAAATTAAGGGTTTTTTTTCTT  
TTTTTCTTGAGACAGAGTCC

>1510

CGTCCGGCCAGTGGTGTGGCCTCAGGTTGTATACTTGAAAGGATGTGTATACTTCAGTA  
TTTTTTCCATTGTAAATTAAGGGTTTTTTTTCTTTTTTCTTGAGACAGAGTCCTACTTT  
GTTGCCCAGGCTTGAGTGCA

>1511

GGTGTGGCCTCAGGTTGTATACTTGAAAGGATGTGTATACTTCAGTATTTTTTCCATTGT  
AAAATTAAGGGTTTTTTTTCTTTTTTCTTGAGACAGAGTCCTACTTTGTTGCCCAGGCT  
TGAGTGCAGTGGCGCGATCT

>1512

GGATGTGTATACTTCAGTATTTTTTCCATTGTAAATTAAGGGTTTTTTTTCTTTTTTCT  
TGAGACAGAGTCCTACTTTGTTGCCCAGGCTTGAGTGCAGTGGCGCGATCTCAGCTCA  
CTGCAACTTCCGCCTCCTGGG

>1513

ACTTCAGTATTTTTTCCATTGTAAATTAAGGGTTTTTTTTCTTTTTTCTTGAGACAGA  
GTCCTACTTTGTTGCCCAGGCTTGAGTGCAGTGGCGCGATCTCAGCTCACTGCAACTTC  
CGCCTCCTGGGTCCAAGTGAT

>1514

AGTCCTACTTTGTTGCCCAGGCTTGAGTGCAGTGGCGCGATCTCAGCTCACTGCAACT  
TCCGCCTCCTGGGTCCAAGTGATTCTCGTGCCTCAGCCTCCCAAGTACCTGGGACCAC



AGGGGTGCACCACCACACCTGGCT

>1515

ACTTTGTTGCCCAGGCTTGAGTGCAGTGGCGGATCTCAGCTCACTGCAACTTCCGCC  
TCCTGGGTCCAAGTGATTCTCGTGCCTCAGCCTCCCAAGTACCTGGGACCACAGGGGT  
GCACCACCACACCTGGCTAATTTT

>1516

TGGCGCGATCTCAGCTCACTGCAACTTCCGCCTCCTGGGTCCAAGTGATTCTCGTGCCT  
CAGCCTCCCAAGTACCTGGGACCACAGGGGTGCACCACCACACCTGGCTAATTTTTGT  
ATATATATATATATATATTTA

>1517

CTGCAACTTCCGCCTCCTGGGTCCAAGTGATTCTCGTGCCTCAGCCTCCCAAGTACCTG  
GGACCACAGGGGTGCACCACCACACCTGGCTAATTTTTGTATATATATATATATATATT  
TAGTAGAGATGGGGTTTCGC

>1518

TGATTCTCGTGCCTCAGCCTCCCAAGTACCTGGGACCACAGGGGTGCACCACCACACC  
TGGCTAATTTTTGTATATATATATATATATATTTAGTAGAGATGGGGTTTCGCCATGTTG  
GCCAGGCTGGTCTTGAATC

>1519

GTACCTGGGACCACAGGGGTGCACCACCACACCTGGCTAATTTTTGTATATATATATATA  
TATATATTTAGTAGAGATGGGGTTTCGCCATGTTGGCCAGGCTGGTCTTGAATCCCCGA  
CCTCAGGTGATCTGCCTGTCT

>1520

CACAGGGGTGCACCACCACACCTGGCTAATTTTTGTATATATATATATATATATTTAGTA  
GAGATGGGGTTTCGCCATGTTGGCCAGGCTGGTCTTGAATCCCGACCTCAGGTGATC  
TGCCTGTCTCAGCCTCCTAA

>1521

GGCTAATTTTTGTATATATATATATATATATATTTAGTAGAGATGGGGTTTCGCCATGTTGG  
CCAGGCTGGTCTTGAATCCCGACCTCAGGTGATCTGCCTGTCTCAGCCTCCTAAAGT  
GCTGGGATTATAGGTGTGAG

>1522

ATATATATATATTTAGTAGAGATGGGGTTTCGCCATGTTGGCCAGGCTGGTCTTGAATC  
CCGACCTCAGGTGATCTGCCTGTCTCAGCCTCCTAAAGTGCTGGGATTATAGGTGTGAG  
CCTGCGCCTGGCCTAAGTT

>1523

TTTAGTAGAGATGGGGTTTCGCCATGTTGGCCAGGCTGGTCTTGAATCCCGACCTCA  
GGTGATCTGCCTGTCTCAGCCTCCTAAAGTGCTGGGATTATAGGTGTGAGCCACTGCGC  
CTGGCCTAAGTTTTTAAAAATTA

>1524

CAGGCTGGTCTTGAATCCCGACCTCAGGTGATCTGCCTGTCTCAGCCTCCTAAAGTG  
CTGGGATTATAGGTGTGAGCCACTGCGCCTGGCCTAAGTTTTTAAAAATTAAGAAT  
GGCATAGTGCTTTTTTGCTCTTT

>1525

CAGGTGATCTGCCTGTCTCAGCCTCCTAAAGTGCTGGGATTATAGGTGTGAGCCACTGC  
GCCTGGCCTAAGTTTTTAAAAATTAAGAATGGCATAGTGCTTTTTTGCTCTTTAAC

AGATCAAGACCAAAAGTTTTCC

>1526

AAGTGCTGGGATTATAGGTGTGAGCCACTGCGCCTGGCCTAAGTTTTTAAAAATTAAAA  
AGAATGGCATAGTGCTTTTTTGCTCTTTAACAGATCAAGACCAAAAGTTTTCCCCCAT  
CATAGCCCCAAAGTCCTAAAGAA

>1527

GGCCTAAGTTTTTAAAAATTAAAAAGAATGGCATAGTGCTTTTTTGCTCTTTAACAGAT  
CAAGACCAAAAGTTTTCCCCCATCATAGCCCCAAAGTCCTAAAGAAAGGCTACTTAAG  
TTGTTTCGTTTTCTTTTGTCTC

>1528

AGAATGGCATAGTGCTTTTTTGCTCTTTAACAGATCAAGACCAAAAGTTTTCCCCCAT  
CATAGCCCCAAAGTCCTAAAGAAAGGCTACTTAAGTTGTTTCGTTTTCTTTTGTCTCCC  
ATGAGTAATGTTTCTAAGTGTG

>1529

CTCTTTAACAGATCAAGACCAAAAGTTTTCCCCCATCATAGCCCCAAAGTCCTAAAGA  
AAGGCTACTTAAGTTGTTTCGTTTTCTTTTGTCTCTCCCATGAGTAATGTTTCTAAGTGTG  
ATTTTGCAGAGAACAGCAGTG

>1530

TTTAACAGATCAAGACCAAAAGTTTTCCCCCATCATAGCCCCAAAGTCCTAAAGAAAG  
GCTACTTAAGTTGTTTCGTTTTCTTTTGTCTCTCCCATGAGTAATGTTTCTAAGTGTGATT  
TTGCAGAGAACAGCAGTGTCT

>1531

ACCAAAAGTTTTCCCCCATCATAGCCCCAAAGTCCTAAAGAAAGGCTACTTAAGTTGTT  
CGTTTTCTTTTGTCTCTCCCATGAGTAATGTTTCTAAGTGTGATTTTGCAGAGAACAGC  
AGTGTCTGACCTCATTCTTGA

>1532

AAAGTCCTAAAGAAAGGCTACTTAAGTTGTTTCGTTTTCTTTTGTCTCTCCCATGAGTAA  
TGTTTCTAAGTGTGATTTTGCAGAGAACAGCAGTGTCTGACCTCATTCTTGAGGGGA  
ACTTTTCTGCCTGCCTCTTCTTG

>1533

TAAGTTGTTTCGTTTTCTTTTGTCTCTCCCATGAGTAATGTTTCTAAGTGTGATTTTGCAG  
GAGAACAGCAGTGTCTGACCTCATTCTTGAGGGGAACTTTTCTGCCTGCCTCTTCTTG  
AGAAAAAATGTTTGTGAGTTGT

>1534

AGTTGTTTCGTTTTCTTTTGTCTCTCCCATGAGTAATGTTTCTAAGTGTGATTTTGCAGAG  
GAACAGCAGTGTCTGACCTCATTCTTGAGGGGAACTTTTCTGCCTGCCTCTTCTTGAG  
AAAAAATGTTTGTGAGTTGTCT

>1535

GCAGAGAACAGCAGTGTCTGACCTCATTCTTGAGGGGAACTTTTCTGCCTGCCTCTTCTC  
TTGAGAAAAAATGTTTGTGAGTTGTCTGGCAAATGGATGCGTTACTTTTGCTGCTGTTG  
CTGCCGCTGCCGTTTTAAAGGCC

>1536

AGAACAGCAGTGTCTGACCTCATTCTTGAGGGGAACTTTTCTGCCTGCCTCTTCTTGA  
GAAAAAATGTTTGTGAGTTGTCTGGCAAATGGATGCGTTACTTTTGCTGCTGTTGCTGC

CGCTGCCGTTTTTAAAGGCCCTG

>1537

CTTGAGGGGAACCTTTTCTGCCTGCCTCTTCTTGAGAAAAATGTTTGTGAGTTGTCTGG  
CAAATGGATGCGTTACTTTTGCTGCTGTTGCTGCCGCTGCCGTTTTAAAGGCCCTGGT  
GACAAAGGAGTGAAGTGCACCT

>1538

TTGAGAAAAATGTTTGTGAGTTGTCTGGCAAATGGATGCGTTACTTTTGCTGCTGTTG  
CTGCCGCTGCCGTTTTAAAGGCCCTGGTGACAAAGGAGTGAAGTGCACCTTCGGGGA  
AAGCATGCCGGAATCTGGCCCAG

>1539

GTGAGTTGTCTGGCAAATGGATGCGTTACTTTTGCTGCTGTTGCTGCCGCTGCCGTTTT  
AAAGGCCCTGGTGACAAAGGAGTGAAGTGCACCTTCGGGGAAGCATGCCGGAATC  
TGGCCCAGAAAAGAGGGGCCGCTG

>1540

GGAGTGAAGTGCACCTTCGGGGAAGCATGCCGGAATCTGGCCCAGAAAAGAGGGGC  
CGCTGGGGGAAGGGTTTGAGATGACGCCTCCTCAGGAACCTTAAAAGAAATCTGTCC  
ATCTGTCTCTGGCATTATGGCATC

>1541

CCCAGAAAAGAGGGGCCGCTGGGGGAAGGGTTTGAGATGACGCCTCCTCAGGAACCT  
TAAAAGAAATCTGTCCATCTGTCTCTGGCATTATGGCATCGTTGACAGCAGTTCAAG  
GAAAAATAAAAATAAGTTCTTATC

>1542

AGAGGGGCCGCTGGGGGAAGGGTTTGAGATGACGCCTCCTCAGGAACCTTAAAAGA  
AATCTGTCCATCTGTCTCTGGCATTATGGCATCGTTGACAGCAGTTCAAGGAAAAATA  
AAAATAAGTTCTTATCTGATTGCG

>1543

GACGCCTCCTCAGGAACCTTAAAAGAAATCTGTCCATCTGTCTCTGGCATTATGGCAT  
CGTTGACAGCAGTTCAAGGAAAAATAAAAATAAGTTCTTATCTGATTGCGGGGCTGATT  
GCAAAGCCGAAGGACTAGAGTG

>1544

AAGAAATCTGTCCATCTGTCTCTGGCATTATGGCATCGTTGACAGCAGTTCAAGGAAA  
AATAAAAATAAGTTCTTATCTGATTGCGGGGCTGATTGCAAAGCCGAAGGACTAGAGT  
GGCCAGCGAGTCGGGCGGCTGGA

>1545

GCAGTTCAAGGAAAAATAAAAATAAGTTCTTATCTGATTGCGGGGCTGATTGCAAAGC  
CGAAGGACTAGAGTGGCCAGCGAGTCGGGCGGCTGGATCTGGAGTTTTGGAGAAAGG  
GCCACTGGCTCATTTCTGGGCACGC

>1546

AAAAATAAAAATAAGTTCTTATCTGATTGCGGGGCTGATTGCAAAGCCGAAGGACTAG  
AGTGGCCAGCGAGTCGGGCGGCTGGATCTGGAGTTTTGGAGAAAGGGCCACTGGCTC  
ATTTCTGGGCACGCACGCTCACGGA

>1547

ATCTGATTGCGGGGCTGATTGCAAAGCCGAAGGACTAGAGTGGCCAGCGAGTCGGGC  
GGCTGGATCTGGAGTTTTGGAGAAAGGGCCACTGGCTCATTTCTGGGCACGCACGCTC

ACGGAGGCAAGTTCTCACCTCCTCG

>1548

GCGGCTGGATCTGGAGTTTTGGAGAAAGGGCCACTGGCTCATTTCTGGGCACGCACGC  
TCACGGAGGCAAGTTCTCACCTCCTCGTGGGCTTCTCTTCACTTTACGTGGAAAACT  
GTGTACGTCTCAAATTAAGCAG

>1549

AGTTTTGGAGAAAGGGCCACTGGCTCATTTCTGGGCACGCACGCTCACGGAGGCAAG  
TTCTCACCTCCTCGTGGGCTTCTCTTCACTTTACGTGGAAAACTGTGTACGTCTCAA  
TTAAAGCAGCTCTTGCCCCGCTT

>1550

GGCTCATTTCTGGGCACGCACGCTCACGGAGGCAAGTTCTCACCTCCTCGTGGGCTTC  
TCTTCACTTTACGTGGAAAACTGTGTACGTCTCAAATTAAGCAGCTCTTGCCCCGC  
TTAGAGCCGGTGAAAGCTGCTTC

>1551

GGGCACGCACGCTCACGGAGGCAAGTTCTCACCTCCTCGTGGGCTTCTCTTCACTTTA  
CGTGGAAAACTGTGTACGTCTCAAATTAAGCAGCTCTTGCCCCGCTTAGAGCCGG  
TGAAAGCTGCTTCGAAGGCGTTTG

>1552

TCTCTTCACTTTACGTGGAAAACTGTGTACGTCTCAAATTAAGCAGCTCTTGCCCC  
GCTTAGAGCCGGTGAAAGCTGCTTCGAAGGCGTTTGTAGAGTAGGGATTGGAAATGTT  
CAATGCAAAAGTTAAATCGTGAC

>1553

AAACTGTGTACGTCTCAAATTAAGCAGCTCTTGCCCCGCTTAGAGCCGGTGAAAGC  
TGCTTCGAAGGCGTTTGTAGAGTAGGGATTGGAAATGTTCAATGCAAAAGTTAAATCG  
TGACAGTTGTCCCCTAAATGATCT

>1554

AGCAGCTCTTGCCCCGCTTAGAGCCGGTGAAAGCTGCTTCGAAGGCGTTTGTAGAGTA  
GGGATTGGAAATGTTCAATGCAAAAGTTAAATCGTGACAGTTGTCCCCTAAATGATCTG  
CTAAATTAAGGATCCGCTAACAT

>1555

CCGCTTAGAGCCGGTGAAAGCTGCTTCGAAGGCGTTTGTAGAGTAGGGATTGGAAATG  
TTCAATGCAAAAGTTAAATCGTGACAGTTGTCCCCTAAATGATCTGCTAAATTAAGGAT  
CCGCTAACATTTGTGAGTCTACC

>1556

AGCCGGTGAAAGCTGCTTCGAAGGCGTTTGTAGAGTAGGGATTGGAAATGTTCAATGC  
AAAAGTTAAATCGTGACAGTTGTCCCCTAAATGATCTGCTAAATTAAGGATCCGCTAAC  
ATTTGTGAGTCTACCTCCCTGCA

>1557

TCAATGCAAAAGTTAAATCGTGACAGTTGTCCCCTAAATGATCTGCTAAATTAAGGATC  
CGCTAACATTTGTGAGTCTACCTCCCTGCATTCCCCCACCCCCACCCCCGCCCCCTTG  
GCAGAAGGGATAAAGATGGTAC

>1558

TGCAAAAGTTAAATCGTGACAGTTGTCCCCTAAATGATCTGCTAAATTAAGGATCCGCT  
AACATTTGTGAGTCTACCTCCCTGCATTCCCCCACCCCCACCCCCGCCCCCTTGGCAG

AAGGGATAAAGATGGTACCTAA

>1559

ATTTGTGAGTCTACCTCCCTGCATTCCCCCACCCCCACCCCCGCCCCCTTGGCAGAAG  
GGATAAAGATGGTACCTAAAAACAATGTGAAGCGGCTGCTAAATCGAGTGACTCTAAA  
AACATTTTTCTTTCCTTGAAGTT

>1560

TCCCTGCATTCCCCCACCCCCACCCCCGCCCCCTTGGCAGAAGGGATAAAGATGGTA  
CCTAAAAACAATGTGAAGCGGCTGCTAAATCGAGTGACTCTAAAAACATTTTTCTTCC  
TTGAAGTTCAGTGTGGAAAACCA

>1561

CACCCCCGCCCCCTTGGCAGAAGGGATAAAGATGGTACCTAAAAACAATGTGAAGCGG  
CTGCTAAATCGAGTGACTCTAAAAACATTTTTCTTTCCTTGAAGTTCAGTGTGGAAAAC  
CAGACTGGACTTGTGAGGGATGC

>1562

ATGGTACCTAAAAACAATGTGAAGCGGCTGCTAAATCGAGTGACTCTAAAAACATTTTT  
CTTTCCTTGAAGTTCAGTGTGGAAAACAGACTGGACTTGTGAGGGATGCAGACCTAT  
ATAGGGCCCATGTGCCTGGCCCC

>1563

ACCTAAAAACAATGTGAAGCGGCTGCTAAATCGAGTGACTCTAAAAACATTTTTCTTTC  
CTTGAAGTTCAGTGTGGAAAACAGACTGGACTTGTGAGGGATGCAGACCTATATAGG  
GCCCATGTGCCTGGCCCCCTTCC

>1564

TGCTAAATCGAGTGACTCTAAAAACATTTTTCTTTCCTTGAAGTTCAGTGTGGAAAACC  
AGACTGGACTTGTGAGGGATGCAGACCTATATAGGGCCCATGTGCCTGGCCCCCTTTCCT  
CACTTTCTAGCACAATGGTTTT

>1565

TCTTTCCTTGAAGTTCAGTGTGGAAAACAGACTGGACTTGTGAGGGATGCAGACCTA  
TATAGGGCCCATGTGCCTGGCCCCCTTTCCTCACTTTCTAGCACAATGGTTTTTCATTGCCA  
CCTCTCCCGCGCCTTTCCCCC

>1566

GACTTGTGAGGGATGCAGACCTATATAGGGCCCATGTGCCTGGCCCCCTTTCCTCACTTT  
CTAGCACAATGGTTTTTCATTGCCACCTCTCCCGCGCCTTTCCCCCCTTCATAATTATCCA  
CTATTTTACTTTCTGTGTCCT

>1567

CACAATGGTTTTTCATTGCCACCTCTCCCGCGCCTTTCCCCCCTTCATAATTATCCACTATT  
TTACTTTCTGTGTCCTGACAGCTACAAGAGTAGTTTTTGTTTTTTTGAGCTGAGTAGCT  
GCTAAATATTCCCCAGCAGC

>1568

CAATGGTTTTTCATTGCCACCTCTCCCGCGCCTTTCCCCCCTTCATAATTATCCACTATTTT  
ACTTTCTGTGTCCTGACAGCTACAAGAGTAGTTTTTGTTTTTTTGAGCTGAGTAGCTGC  
TAAATATTCCCCAGCAGCCA

>1569

CCTCTCCCGCGCCTTTCCCCCCTTCATAATTATCCACTATTTTACTTTCTGTGTCCTGACA  
GCTACAAGAGTAGTTTTTGTTTTTTTGAGCTGAGTAGCTGCTAAATATTCCCCAGCAGC

CAGATTCAACGGCTGGGGGG

>1570

CTCCCGCGCCTTTCCCCCTTCATAATTATCCACTATTTTACTTTCTGTGTCCTGACAGCT  
ACAAGAGTAGTTTTTGTTTTTTTGAGCTGAGTAGCTGCTAAATATTCCCCAGCAGCCAG  
ATTCAACGGCTGGGGGGGAG

>1571

CATAATTATCCACTATTTTACTTTCTGTGTCCTGACAGCTACAAGAGTAGTTTTTGTTTTT  
TTGAGCTGAGTAGCTGCTAAATATTCCCCAGCAGCCAGATTCAACGGCTGGGGGGGAG  
AATAGGCCAAACCTTGGCATC

>1572

CTGCTAAATATTCCCCAGCAGCCAGATTCAACGGCTGGGGGGGAGAATAGGCCAAACC  
TTGGCATCCCCTGTTGCAAAAGTGAAAAATATTTCTGTTTGCAGTTAATTTTAGTGGCA  
AGCAGATCATGTAACTGGATGT

>1573

ATTCCCCAGCAGCCAGATTCAACGGCTGGGGGGGAGAATAGGCCAAACCTTGGCATCC  
CCTGTTGCAAAAGTGAAAAATATTTCTGTTTGCAGTTAATTTTAGTGGCAAGCAGATCA  
TGTTAACTGGATGTAATTGCTTC

>1574

GATTCAACGGCTGGGGGGGAGAATAGGCCAAACCTTGGCATCCCCTGTTGCAAAAGTG  
AAAAATATTTCTGTTTGCAGTTAATTTTAGTGGCAAGCAGATCATGTAACTGGATGTAA  
TTGCTTCCAGATATGGCCGAGG

>1575

CGGCTGGGGGGGAGAATAGGCCAAACCTTGGCATCCCCTGTTGCAAAAGTGAAAAATA  
TTTCTGTTTGCAGTTAATTTTAGTGGCAAGCAGATCATGTAACTGGATGTAATTGCTTC  
CAGATATGGCCGAGGGTTTTGT

>1576

CTTGGCATCCCCTGTTGCAAAAGTGAAAAATATTTCTGTTTGCAGTTAATTTTAGTGGC  
AAGCAGATCATGTAACTGGATGTAATTGCTTCCAGATATGGCCGAGGGTTTTGTGTGT  
TGAGATGAAGGGTCTGGTAAGT

>1577

CTGTTGCAAAAGTGAAAAATATTTCTGTTTGCAGTTAATTTTAGTGGCAAGCAGATCAT  
GTAACTGGATGTAATTGCTTCCAGATATGGCCGAGGGTTTTGTGTGTTGAGATGAAGG  
GTCTGGTAAGTGCTTACTTCCT

>1578

GTTTGCAGTTAATTTTAGTGGCAAGCAGATCATGTAACTGGATGTAATTGCTTCCAGAT  
ATGGCCGAGGGTTTTGTGTGTTGAGATGAAGGGTCTGGTAAGTGCTTACTTCCTGTGTA  
AATTAGCCTATTCCATTCAGT

>1579

CAGTTAATTTTAGTGGCAAGCAGATCATGTAACTGGATGTAATTGCTTCCAGATATGGC  
CGAGGGTTTTGTGTGTTGAGATGAAGGGTCTGGTAAGTGCTTACTTCCTGTGTAAATTA  
GCCTATTCCATTCAGTCTTC

>1580

GTAATTGCTTCCAGATATGGCCGAGGGTTTTGTGTGTTGAGATGAAGGGTCTGGTAAGT  
GCTTACTTCCTGTGTAAATTAGCCTATTCCATTCAGTCTTTCATTCTGGCCAGCCCTGGA

TTCTGTCATTCTGCTCCCAATT

>1581

AATTGCTTCCAGATATGGCCGAGGGTTTTGTGTGTTGAGATGAAGGGTCTGGTAAGTGC  
T TACTTCCTGTGTAAATTAGCCTATTCCATTCACTCTTTCATTCTGGCCAGCCCTGGATT  
CTGTCATTCTGCTCCCAATTTT

>1582

GGGTTTTGTGTGTTGAGATGAAGGGTCTGGTAAGTGCTTACTTCCTGTGTAAATTAGCC  
TATTCCATTCACTCTTTCATTCTGGCCAGCCCTGGATTCTGTCATTCTGCTCCCAATTTTCC  
CCCTCCCCAGCCTGCAGCCT

>1583

GTAAGTGCTTACTTCCTGTGTAAATTAGCCTATTCCATTCACTCTTTCATTCTGGCCAGC  
CCTGGATTCTGTCATTCTGCTCCCAATTTTCCCCCTCCCCAGCCTGCAGCCTGGTGTGAG  
AAGCCGCTTGCTATGTTCTC

>1584

TCTTTCATTCTGGCCAGCCCTGGATTCTGTCATTCTGCTCCCAATTTTCCCCCTCCCCAGC  
CTGCAGCCTGGTGTGAGAAGCCGCTTGCTATGTTCTCTAAGTGTAATTCTTTTGTAC  
TTGGAGCCACTCTCCTCTTGG

>1585

GGATTCTGTCATTCTGCTCCCAATTTTCCCCCTCCCCAGCCTGCAGCCTGGTGTGAGAAG  
CCGCTTGCTATGTTCTCTAAGTGTAATTCTTTTGTCACTTGGAGCCACTCTCCTCTTGG  
TTCTTGATGTGAGTTTGCCCT

>1586

ATTCTGCTCCCAATTTTCCCCCTCCCCAGCCTGCAGCCTGGTGTGAGAAGCCGCTTGCTA  
TGTTCTCTAAGTGTAATTCTTTTGTCACTTGGAGCCACTCTCCTCTTGTTCTTGATGT  
GAGTTTGCCCTTAAATAATGA

>1587

TTTCCCCCTCCCCAGCCTGCAGCCTGGTGTGAGAAGCCGCTTGCTATGTTCTCTAAGT  
GTAATTCTTTTGTCACTTGGAGCCACTCTCCTCTTGTTCTTGATGTGAGTTTGCCCTTA  
AATAATGAGAAGGGTTTGAAA

>1588

AGCCGCTTGCTATGTTCTCTAAGTGTAATTCTTTTGTCACTTGGAGCCACTCTCCTCTT  
GGTTCTTGATGTGAGTTTGCCCTTAAATAATGAGAAGGGTTTGAAAAGATGCCACCTG  
GACCCAGGCCACCTCCCGCCT

>1589

GCTTGCTATGTTCTCTAAGTGTAATTCTTTTGTCACTTGGAGCCACTCTCCTCTTGTT  
CTTGATGTGAGTTTGCCCTTAAATAATGAGAAGGGTTTGAAAAGATGCCACCTGGACC  
CCAGGCCACCTCCCGCCTCTTT

>1590

ATTCTTTTGTCACTTGGAGCCACTCTCCTCTTGTTCTTGATGTGAGTTTGCCCTTAAAT  
AATGAGAAGGGTTTGAAAAGATGCCACCTGGACCCAGGCCACCTCCCGCCTCTTTCC  
CAGCAAAGGCAGATCTGAAGAG

>1591

GATGCCACCTGGACCCAGGCCACCTCCCGCCTCTTTCCAGCAAAGGCAGATCTGAA  
GAGCATCTCCTGGTCATGGGGGTTGCATCTTGGAACCCAGAACTCCTTGTTTCTATGC

ATTTTTTTTTCTACTGCCCTCT

>1592

TGGACCCCAGGCCACCTCCCGCCTCTTTCCCAGCAAAGGCAGATCTGAAGAGCATCTC  
CTGGTCATGGGGGTTCATCTTGGAACCCAGAACTCCTTGTTTTCTATGCATTTTTTTT  
CCTACTGCCCTCTGACCCCCGA

>1593

TCCCAGCAAAGGCAGATCTGAAGAGCATCTCCTGGTCATGGGGGTTCATCTTGGAAC  
CCAGAACTCCTTGTTTTCTATGCATTTTTTTTCTACTGCCCTCTGACCCCCGACTCTC  
ACCTGGGAGAACACCTTCTCTT

>1594

ATTTTTTTTTCTACTGCCCTCTGACCCCCGACTCTCACCTGGGAGAACACCTTCTCTTT  
CTCTCAATTAGTCCGACTCCTCCTCAGCCTGAACTAAGCACGTTCCAGTGGGTCCGAA  
ATCTCAGAAAAAATGAAACGGC

>1595

ACTCTCACCTGGGAGAACACCTTCTCTTTCTCTCAATTAGTCCGACTCCTCCTCAGCCT  
GAACTAAGCACGTTCCAGTGGGTCCGAAATCTCAGAAAAAATGAAACGGCTGTTGCG  
CAGAGGAGAAGGTTGTGGCCACAG

>1596

ACCTGGGAGAACACCTTCTCTTTCTCTCAATTAGTCCGACTCCTCCTCAGCCTGAACTA  
AGCACGTTCCAGTGGGTCCGAAATCTCAGAAAAAATGAAACGGCTGTTGCGCAGAGG  
AGAAGGTTGTGGCCACAGAAAGGA

>1597

TCCGACTCCTCCTCAGCCTGAACTAAGCACGTTCCAGTGGGTCCGAAATCTCAGAAAA  
AATGAAACGGCTGTTGCGCAGAGGAGAAGGTTGTGGCCACAGAAAGGAGTTGCCTCA  
TCAGACGTGAAGCCGCCACCTTGCC

>1598

CTGAACTAAGCACGTTCCAGTGGGTCCGAAATCTCAGAAAAAATGAAACGGCTGTTGC  
GCAGAGGAGAAGGTTGTGGCCACAGAAAGGAGTTGCCTCATCAGACGTGAAGCCGCC  
ACCTTGCTTGCAAAGCAGGCTGCA

>1599

AACTAAGCACGTTCCAGTGGGTCCGAAATCTCAGAAAAAATGAAACGGCTGTTGCGC  
AGAGGAGAAGGTTGTGGCCACAGAAAGGAGTTGCCTCATCAGACGTGAAGCCGCCAC  
CTTGCTTGCAAAGCAGGCTGCACCT

>1600

CAGAAAAAATGAAACGGCTGTTGCGCAGAGGAGAAGGTTGTGGCCACAGAAAGGAG  
TTGCCTCATCAGACGTGAAGCCGCCACCTTGCTTGCAAAGCAGGCTGCACCTCCTGA  
CACACCTGCCCCTCCCTGCAAGAAAG

>1601

ACCTCCTGACACACCTGCCCCTCCCTGCAAGAAAGGGAGGGGAAATCCCACCCAAGA  
GAACCTTCTCCAGGTTCTGTGGGTTTCCAGGGTTGCAACTGAAGAAAAGTGTTAAGA  
TTCATGTTCTCCTAAATTCTGCTTT

>1602

TGACACACCTGCCCCTCCCTGCAAGAAAGGGAGGGGAAATCCCACCCAAGAGAACCT  
TCTCCAGGTTCTGTGGGTTTCCAGGGTTGCAACTGAAGAAAAGTGTTAAGATTCATG



TTCTCCTAAATTCTGCTTTTGTCT

>1603

GAGGGGAAATCCCACCCAAGAGAACCTTCTCCAGGTTCTGTGGGTTTCCAGGGTTGC  
AACTGAAGAAAAGTGTTAAGATTCATGTTCTCCTAAATTCTGCTTTTGTCTGTGGCCA  
GTCCACATTCTTAGTGCTATTT

>1604

GGGGAAATCCCACCCAAGAGAACCTTCTCCAGGTTCTGTGGGTTTCCAGGGTTGCAA  
CTGAAGAAAAGTGTTAAGATTCATGTTCTCCTAAATTCTGCTTTTGTCTGTGGCCAGT  
CCCACATTCTTAGTGCTATTTGC

>1605

TTCTGTGGGTTTCCAGGGTTGCAACTGAAGAAAAGTGTTAAGATTCATGTTCTCCTAA  
ATTCTGCTTTTGTCTGTGGCCAGTCCCACATTCTTAGTGCTATTTGCATAAGAGGTTGC  
TGTTTATCTTCCTATATCAGC

>1606

TGAAGAAAAGTGTTAAGATTCATGTTCTCCTAAATTCTGCTTTTGTCTGTGGCCAGTC  
CCACATTCTTAGTGCTATTTGCATAAGAGGTTGCTGTTTATCTTCCTATATCAGCCCCACT  
GATAACCCCTGTGGTCTGTT

>1607

TTCATGTTCTCCTAAATTCTGCTTTTGTCTGTGGCCAGTCCCACATTCTTAGTGCTATTT  
GCATAAGAGGTTGCTGTTTATCTTCCTATATCAGCCCCACTGATAACCCCTGTGGTCTGT  
TTAACAACCTATGAGGAGT

>1608

CACATTCTTAGTGCTATTTGCATAAGAGGTTGCTGTTTATCTTCCTATATCAGCCCCACTG  
ATAACCCCTGTGGTCTGTTTAAACAACCTATGAGGAGTAGATTACTTGATAAATGCCAGT  
TTTTCCAATATGCAAAGATA

>1609

ATTCTTAGTGCTATTTGCATAAGAGGTTGCTGTTTATCTTCCTATATCAGCCCCACTGATA  
ACCCCTGTGGTCTGTTTAAACAACCTATGAGGAGTAGATTACTTGATAAATGCCAGTTTTT  
CCAATATGCAAAGATAAAC

>1610

AGGTTGCTGTTTATCTTCCTATATCAGCCCCACTGATAACCCCTGTGGTCTGTTTAAACA  
CCTATGAGGAGTAGATTACTTGATAAATGCCAGTTTTTCCAATATGCAAAGATAAACTGT  
TGGGGTCAGGGTGAGGGGTG

>1611

ATCAGCCCCACTGATAACCCCTGTGGTCTGTTTAAACAACCTATGAGGAGTAGATTACTT  
GATAAATGCCAGTTTTTCCAATATGCAAAGATAAACTGTTGGGGTCAGGGTGAGGGGT  
GGTGTGTTATGAAGGAGGGGACA

>1612

TCTGTTTAAACAACCTATGAGGAGTAGATTACTTGATAAATGCCAGTTTTTCCAATATGCA  
AAGATAAACTGTTGGGGTCAGGGTGAGGGGTGGTGTGTTATGAAGGAGGGGACAGGT  
GGGGAGCCAGGACCCTCTTTTAG

>1613

TAACAACCTATGAGGAGTAGATTACTTGATAAATGCCAGTTTTTCCAATATGCAAAGATA  
AACTGTTGGGGTCAGGGTGAGGGGTGGTGTGTTATGAAGGAGGGGACAGGTGGGGAG

CCAGGACCCTCTTTTAGTGGGCT

>1614

TTTTTCCAATATGCAAAGATAAACTGTTGGGGTCAGGGTGAGGGGTGGTGTGTTATGAA  
GGAGGGGACAGGTGGGGAGCCAGGACCCTCTTTTAGTGGGCTGGAGAAGTGTGAAAG  
AGCCTGATGAAAGAAAACAGGTAG

>1615

TGTTGGGGTCAGGGTGAGGGGTGGTGTGTTATGAAGGAGGGGACAGGTGGGGAGCCA  
GGACCTCTTTTAGTGGGCTGGAGAAGTGTGAAAGAGCCTGATGAAAGAAAACAGGT  
AGCTTGTCACATAACAACAGCTGCATT

>1616

GAGGGGTGGTGTGTTATGAAGGAGGGGACAGGTGGGGAGCCAGGACCCTCTTTTAGT  
GGGCTGGAGAAGTGTGAAAGAGCCTGATGAAAGAAAACAGGTAGCTTGTCACATACA  
ACAGCTGCATTTATCATACGGTTGAT

>1617

ACAGGTGGGGAGCCAGGACCCTCTTTTAGTGGGCTGGAGAAGTGTGAAAGAGCCTGA  
TGAAAGAAAACAGGTAGCTTGTCACATAACAACAGCTGCATTTATCATACGGTTGATCAG  
CTTCCTGCCCTCACCTACTTTTCT

>1618

GGGAGCCAGGACCCTCTTTTAGTGGGCTGGAGAAGTGTGAAAGAGCCTGATGAAAGA  
AAACAGGTAGCTTGTCACATAACAACAGCTGCATTTATCATACGGTTGATCAGCTTCCTG  
CCCTCACCTACTTTTCTCCTCCTT

>1619

AGAAGTGTGAAAGAGCCTGATGAAAGAAAACAGGTAGCTTGTCACATAACAACAGCTG  
CATTTATCATACGGTTGATCAGCTTCCTGCCCTCACCTACTTTTCTCCTCCTTCATGTGG  
ACATGCAGAGTCTCTGAGAACAT

>1620

ACATAACAACAGCTGCATTTATCATACGGTTGATCAGCTTCCTGCCCTCACCTACTTTTCT  
CCTCCTTCATGTGGACATGCAGAGTCTCTGAGAACATTTTCATCAAGTGGGTTGCCTATG  
CCCACATTAATACAAGATGGG

>1621

GCATTTATCATACGGTTGATCAGCTTCCTGCCCTCACCTACTTTTCTCCTCCTTCATGTG  
GACATGCAGAGTCTCTGAGAACATTTTCATCAAGTGGGTTGCCTATGCCCACATTAATAC  
AAGATGGGAAAGGGTGGAGGT

>1622

GCTTCCTGCCCTCACCTACTTTTCTCCTCCTTCATGTGGACATGCAGAGTCTCTGAGAA  
CATTTTCATCAAGTGGGTTGCCTATGCCCACATTAATACAAGATGGGAAAGGGTGGAGGT  
TATCTTTGCTTTTAAAGTTCCC

>1623

CCTGCCCTCACCTACTTTTCTCCTCCTTCATGTGGACATGCAGAGTCTCTGAGAACATT  
TCATCAAGTGGGTTGCCTATGCCCACATTAATACAAGATGGGAAAGGGTGGAGGTTATC  
TTTGCTTTTAAAGTTCCCATCT

>1624

CATGCAGAGTCTCTGAGAACATTTTCATCAAGTGGGTTGCCTATGCCCACATTAATACAA  
GATGGGAAAGGGTGGAGGTTATCTTTGCTTTTAAAGTTCCCATCTTTTCTCCTTGGTC

CTCTCCCACCCCTACAAGTTG

>1625

CATCAAGTGGGTTGCCTATGCCCACATTAATACAAGATGGGAAAGGGTGGAGGTTATCT  
TTGCTTTTTTAAGTTCCCATCTTTTTCTCCCTTGGTCCTCTCCCACCCCTACAAGTTGTTG  
GCTGGTAAGCAATTGATGCTC

>1626

CACATTAATACAAGATGGGAAAGGGTGGAGGTTATCTTTGCTTTTTTAAGTTCCCATCTTT  
TTCTCCCTTGGTCCTCTCCCACCCCTACAAGTTGTTGGCTGGTAAGCAATTGATGCTCA  
GAAAAATGATGTTTCATCTGAA

>1627

GGTGGAGGTTATCTTTGCTTTTTTAAGTTCCCATCTTTTTCTCCCTTGGTCCTCTCCCACC  
CCTACAAGTTGTTGGCTGGTAAGCAATTGATGCTCAGAAAAATGATGTTTCATCTGAAAT  
CTTAAATGAGTGGACTTTTTTC

>1628

TTATCTTTGCTTTTTTAAGTTCCCATCTTTTTCTCCCTTGGTCCTCTCCCACCCCTACAAGT  
TGTTGGCTGGTAAGCAATTGATGCTCAGAAAAATGATGTTTCATCTGAAATCTTAAATGA  
GTGGACTTTTTCTACCTTCC

>1629

TTTCTCCCTTGGTCCTCTCCCACCCCTACAAGTTGTTGGCTGGTAAGCAATTGATGCTC  
AGAAAAATGATGTTTCATCTGAAATCTTAAATGAGTGGACTTTTTCTACCTTCCCTGACT  
TTGCAGGTGCTTCTTGAAGAGC

>1630

CCCCTACAAGTTGTTGGCTGGTAAGCAATTGATGCTCAGAAAAATGATGTTTCATCTGAA  
ATCTTAAATGAGTGGACTTTTTCTACCTTCCCTGACTTTGCAGGTGCTTCTTGAAGAGC  
CAAGGAGAAAAGAAAACCTCTG

>1631

TGCTCAGAAAAATGATGTTTCATCTGAAATCTTAAATGAGTGGACTTTTTCTACCTTCCCT  
GACTTTGCAGGTGCTTCTTGAAGAGCCAAGGAGAAAAGAAAACCTTCTGACCTCATCA  
CCTAGTCAATAAGCTGTCTGAGA

>1632

ACCTTCCCTGACTTTGCAGGTGCTTCTTGAAGAGCCAAGGAGAAAAGAAAACCTTCTG  
ACCTCATCACCTAGTCAATAAGCTGTCTGAGAAACAAACAAAAGAGTTTAGACTGGCT  
GCTAAAGCTAGGAACCCAGCTGATA

>1633

CTTTGCAGGTGCTTCTTGAAGAGCCAAGGAGAAAAGAAAACCTTCTGACCTCATCACCT  
AGTCAATAAGCTGTCTGAGAAACAAACAAAAGAGTTTAGACTGGCTGCTAAAGCTAG  
GAACCCAGCTGATAGCTTTGTTTTG

>1634

TAAGCTGTCTGAGAAACAAACAAAAGAGTTTAGACTGGCTGCTAAAGCTAGGAACCC  
AGCTGATAGCTTTGTTTTGATGTCCTTGTAATGTTTGCGGATCGCAGAGGGTGCTATTTA  
GAGCAGGGGGCATCTACTGGGAC

>1635

CTGAGAAACAAACAAAAGAGTTTAGACTGGCTGCTAAAGCTAGGAACCCAGCTGATA  
GCTTTGTTTTGATGTCCCTGTAATGTTTGCGGATCGCAGAGGGTGCTATTTAGAGCAGG

GGGCATCTACTGGGACAGACTCAC

>1636

GCTGCTAAAGCTAGGAACCCAGCTGATAGCTTTGTTTTGATGTCCTTGTAATGTTTGCG  
GATCGCAGAGGGTGCTATTTAGAGCAGGGGGCATCTACTGGGACAGACTCACTGGGAA  
GTTGAAACAGCTAGCTCAAAGTC

>1637

GTAATGTTTGCGGATCGCAGAGGGTGCTATTTAGAGCAGGGGGCATCTACTGGGACAG  
ACTCACTGGGAAGTTGAAACAGCTAGCTCAAAGTCCAAGAGATGCTAAAGATAGTGA  
AATACAGCCCAGGAATTGAGGGGGA

>1638

AGGGTGCTATTTAGAGCAGGGGGCATCTACTGGGACAGACTCACTGGGAAGTTGAAAC  
AGCTAGCTCAAAGTCCAAGAGATGCTAAAGATAGTGAAATACAGCCCAGGAATTGAGG  
GGGAGGGGGTTTCCTCACTCAAGAA

>1639

GGCATCTACTGGGACAGACTCACTGGGAAGTTGAAACAGCTAGCTCAAAGTCCAAGA  
GATGCTAAAGATAGTGAAATACAGCCCAGGAATTGAGGGGGAGGGGGTTTCCTCACTCA  
AGAAGGAGACTTTCTAGGAGGGGGC

>1640

AAACAGCTAGCTCAAAGTCCAAGAGATGCTAAAGATAGTGAAATACAGCCCAGGAATT  
GAGGGGGAGGGGGTTTCCTCACTCAAGAAGGAGACTTTCTAGGAGGGGGCGGGCGTG  
GTATTTTCTAGGGACAGTATGGAATG

>1641

AATACAGCCCAGGAATTGAGGGGGAGGGGGTTTCCTCACTCAAGAAGGAGACTTTCTA  
GGAGGGGGCGGGCGTGGTATTTTCTAGGGACAGTATGGAATGAAGGGAAGAAGGTTG  
GCTTTAGAAGGAGGCACCCTGTGGGA

>1642

ACAGCCCAGGAATTGAGGGGGAGGGGGTTTCCTCACTCAAGAAGGAGACTTTCTAGGA  
GGGGGCGGGCGTGGTATTTTCTAGGGACAGTATGGAATGAAGGGAAGAAGGTTGGCTT  
TAGAAGGAGGCACCCTGTGGGAGGC

>1643

GGGGGAGGGGGTTTCCTCACTCAAGAAGGAGACTTTCTAGGAGGGGGCGGGCGTGGA  
TTTTCTAGGGACAGTATGGAATGAAGGGAAGAAGGTTGGCTTTAGAAGGAGGCACCCT  
GTGGGAGGCTGAGACAGGTGGGTCA

>1644

AAGAAGGAGACTTTCTAGGAGGGGGCGGGCGTGGTATTTTCTAGGGACAGTATGGAAT  
GAAGGGAAGAAGGTTGGCTTTAGAAGGAGGCACCCTGTGGGAGGCTGAGACAGGTG  
GGTCACCTGAGGTCAGGAGTTTGAGA

>1645

GCGGGCGTGGTATTTTCTAGGGACAGTATGGAATGAAGGGAAGAAGGTTGGCTTTAGA  
AGGAGGCACCCTGTGGGAGGCTGAGACAGGTGGGTCACCTGAGGTCAGGAGTTTGAG  
ACCAGCCTGGCCAACATGGTGAAAC

>1646

TAGGGACAGTATGGAATGAAGGGAAGAAGGTTGGCTTTAGAAGGAGGCACCCTGTGG  
GAGGCTGAGACAGGTGGGTCACCTGAGGTCAGGAGTTTGAGACCAGCCTGGCCAACA

TGGTGAAACCCAGTCTCTACTAAAAA

>1647

GACAGTATGGAATGAAGGGAAGAAGGTTGGCTTTAGAAGGAGGCACCCTGTGGGAGG  
CTGAGACAGGTGGGTCACCTGAGGTCAGGAGTTTGAGACCAGCCTGGCCAACATGGT  
GAAACCCAGTCTCTACTAAAAATACA

>1648

GCACCCTGTGGGAGGCTGAGACAGGTGGGTCACCTGAGGTCAGGAGTTTGAGACCAG  
CCTGGCCAACATGGTGAAACCCAGTCTCTACTAAAAATACAAAAATTAGCTGGGTGGC  
AGGTGCCTGTAATCCCAGCTAGTCG

>1649

GGAGGCTGAGACAGGTGGGTCACCTGAGGTCAGGAGTTTGAGACCAGCCTGGCCAAC  
ATGGTGAAACCCAGTCTCTACTAAAAATACAAAAATTAGCTGGGTGGCAGGTGCCTGT  
AATCCCAGCTAGTCGGGGGAGGCTG

>1650

CAGGAGTTTGAGACCAGCCTGGCCAACATGGTGAAACCCAGTCTCTACTAAAAATACA  
AAAATTAGCTGGGTGGCAGGTGCCTGTAATCCCAGCTAGTCGGGGGAGGCTGAGGCA  
GGAAAATCGCTTGGGATTACAGGTG

>1651

CATGGTGAAACCCAGTCTCTACTAAAAATACAAAAATTAGCTGGGTGGCAGGTGCCTG  
TAATCCCAGCTAGTCGGGGGAGGCTGAGGCAGGAAAATCGCTTGGGATTACAGGTGCC  
TGTAATCCCAGCTAGTCGGGAGAG

>1652

TGGGTGGCAGGTGCCTGTAATCCCAGCTAGTCGGGGGAGGCTGAGGCAGGAAAATCG  
CTTGGGATTACAGGTGCCTGTAATCCCAGCTAGTCGGGAGAGGCTGAGGCAGGAAAAT  
TGCTTGAAGGAGGCGGAGGTTGCAG

>1653

ATCCCAGCTAGTCGGGGGAGGCTGAGGCAGGAAAATCGCTTGGGATTACAGGTGCCTG  
TAATCCCAGCTAGTCGGGAGAGGCTGAGGCAGGAAAATTGCTTGAAGGAGGCGGAGG  
TTGCAGTGAGCCCAGATCCTGCCGT

>1654

ATTACAGGTGCCTGTAATCCCAGCTAGTCGGGAGAGGCTGAGGCAGGAAAATTGCTTG  
AAGGAGGCGGAGGTTGCAGTGAGCCCAGATCCTGCCGTTGCACTCCAGCCCAAGACT  
TTGTCTCATTAAAAAAGAA

>1655

GGTGCCTGTAATCCCAGCTAGTCGGGAGAGGCTGAGGCAGGAAAATTGCTTGAAGGA  
GGCGGAGGTTGCAGTGAGCCCAGATCCTGCCGTTGCACTCCAGCCCAAGACTTTGTCT  
CATTAAAAAAGAA

>1656

TAGTCGGGAGAGGCTGAGGCAGGAAAATTGCTTGAAGGAGGCGGAGGTTGCAGTGAG  
CCCAGATCCTGCCGTTGCACTCCAGCCCAAGACTTTGTCTCATTAAAAAAGAA  
AAGAAGAAGAAGAAGGAGGCACCCT

>1657

AAAATTGCTTGAAGGAGGCGGAGGTTGCAGTGAGCCCAGATCCTGCCGTTGCACTCC  
AGCCCAAGACTTTGTCTCATTAAAAAAGAAAGAAGAAGAAGAAGGAGGCA

CCCTGGATGAAGACTCAGGCTCCAGAA

>1658

AAAAAAAAAAGAAGAAGAAGAAGAAGGAGGCACCCTGGATGAAGACTCAGGCTCC  
AGAATTTACTATCTGTATGTCTTGGGCAAGTGGCTTAGCTTCTCTGAGCCCCTGTTTACT  
TTTCTTTTGAAAATGACCACCTTG

>1659

AAAAAAGAAGAAGAAGAAGAAGGAGGCACCCTGGATGAAGACTCAGGCTCCAGAA  
TTTACTATCTGTATGTCTTGGGCAAGTGGCTTAGCTTCTCTGAGCCCCTGTTTACTTTTC  
TTTTGAAAATGACCACCTTGTCCTA

>1660

AAGAAGAAGAAGGAGGCACCCTGGATGAAGACTCAGGCTCCAGAAATTTACTATCTGTA  
TGTCTTGGGCAAGTGGCTTAGCTTCTCTGAGCCCCTGTTTACTTTTCTTTTGAAAATGA  
CCACCTTGTCCTATGGTAATGAGG

>1661

ATGAAGACTCAGGCTCCAGAAATTTACTATCTGTATGTCTTGGGCAAGTGGCTTAGCTTC  
TCTGAGCCCCTGTTTACTTTTCTTTTGAAAATGACCACCTTGTCCTATGGTAATGAGGATA  
AAAAACGTGTAAAGTGCATAG

>1662

TGTATGTCTTGGGCAAGTGGCTTAGCTTCTCTGAGCCCCTGTTTACTTTTCTTTTGAAAA  
TGACCACCTTGTCCTATGGTAATGAGGATAAAAAACGTGTAAAGTGCATAGCAGAGTGC  
AGGTGTACTGGGTAGACATGTA

>1663

CTTGGGCAAGTGGCTTAGCTTCTCTGAGCCCCTGTTTACTTTTCTTTTGAAAATGACCA  
CCTTGTCCTATGGTAATGAGGATAAAAAACGTGTAAAGTGCATAGCAGAGTGCAGGTGT  
ACTGGGTAGACATGTATGATTGC

>1664

CTTCTCTGAGCCCCTGTTTACTTTTCTTTTGAAAATGACCACCTTGTCCTATGGTAATGAG  
GATAAAAAACGTGTAAAGTGCATAGCAGAGTGCAGGTGTACTGGGTAGACATGTATGA  
TTGCGCTGTAGCCCTGTTATGG

>1665

CTTTTGAAAATGACCACCTTGTCCTATGGTAATGAGGATAAAAAACGTGTAAAGTGCATA  
GCAGAGTGCAGGTGTACTGGGTAGACATGTATGATTGCGCTGTAGCCCTGTTATGGCCC  
GGGAGAAACTATGAAAGGAAC

>1666

TTTGAAAATGACCACCTTGTCCTATGGTAATGAGGATAAAAAACGTGTAAAGTGCATAG  
CAGAGTGCAGGTGTACTGGGTAGACATGTATGATTGCGCTGTAGCCCTGTTATGGCCCG  
GGGAGAAACTATGAAAGGAACCA

>1667

ATGACCACCTTGTCCTATGGTAATGAGGATAAAAAACGTGTAAAGTGCATAGCAGAGTG  
CAGGTGTACTGGGTAGACATGTATGATTGCGCTGTAGCCCTGTTATGGCCCGGGGAGAA  
ACTATGAAAGGAACCAAGTGAAAT

>1668

CTTGTCCTATGGTAATGAGGATAAAAAACGTGTAAAGTGCATAGCAGAGTGCAGGTGTA  
CTGGGTAGACATGTATGATTGCGCTGTAGCCCTGTTATGGCCCGGGGAGAAACTATGAA

AGGAACCAGTGAAATCTTTTGTT

>1669

AAAAAACGTGTAAAGTGCATAGCAGAGTGCAGGTGTACTGGGTAGACATGTATGATTG  
CGCTGTAGCCCTGTTATGGCCCGGGGAGAACTATGAAAGGAACCAGTGAAATCTTTT  
GTTTTGGGCACTGCTAAATTGATG

>1670

GTAAGGTAGACATGTATGATTGCGCTGTAGCCCTGTTATGGCCCGGGGAGAACTAT  
GAAAGGAACCAGTGAAATCTTTTGTTTTGGGCACTGCTAAATTGATGATAGTACTAACC  
CTGTGCTAGCAGCCAGCCGGTG

>1671

CATGTATGATTGCGCTGTAGCCCTGTTATGGCCCGGGGAGAACTATGAAAGGAACCA  
GTGAAATCTTTTGTTTTGGGCACTGCTAAATTGATGATAGTACTAACCCTGTGCTAGCA  
GCCAGCCGGTGAAATAATAGGTG

>1672

ATGGCCCGGGGAGAACTATGAAAGGAACCAGTGAAATCTTTTGTTTTGGGCACTGCT  
AAATTGATGATAGTACTAACCCTGTGCTAGCAGCCAGCCGGTGAAATAATAGGTGAATA  
ATGTTAGTACATTGTGAATATAA

>1673

AGAACTATGAAAGGAACCAGTGAAATCTTTTGTTTTGGGCACTGCTAAATTGATGATA  
GTACTAACCCTGTGCTAGCAGCCAGCCGGTGAAATAATAGGTGAATAATGTTAGTACAT  
TGTGAATATAAAAGTTTCCATT

>1674

CCAGTGAAATCTTTTGTTTTGGGCACTGCTAAATTGATGATAGTACTAACCCTGTGCTAG  
CAGCCAGCCGGTGAAATAATAGGTGAATAATGTTAGTACATTGTGAATATAAAAGTTTC  
CATTTGCAAAGTGCTACTGCT

>1675

TTTGTTTTGGGCACTGCTAAATTGATGATAGTACTAACCCTGTGCTAGCAGCCAGCCGG  
TGAAATAATAGGTGAATAATGTTAGTACATTGTGAATATAAAAGTTTCCATTTGCAAAGT  
GCTACTGCTGTTCTAAAGAAG

>1676

ACTAACCCTGTGCTAGCAGCCAGCCGGTGAAATAATAGGTGAATAATGTTAGTACATTG  
TGAATATAAAAGTTTCCATTTGCAAAGTGCTACTGCTGTTCTAAAGAAGCCACATTTCT  
AATAAATGATTGCTTAATCCTG

>1677

GCAGCCAGCCGGTGAAATAATAGGTGAATAATGTTAGTACATTGTGAATATAAAAGTTT  
CCATTTGCAAAGTGCTACTGCTGTTCTAAAGAAGCCACATTTCTAATAAATGATTGCTTA  
ATCCTGTGATGCTGCCACAGC

>1678

GTGAAATAATAGGTGAATAATGTTAGTACATTGTGAATATAAAAGTTTCCATTTGCAAAG  
TGCTACTGCTGTTCTAAAGAAGCCACATTTCTAATAAATGATTGCTTAATCCTGTGATGC  
TGCCACAGCCCCACAGAGTT

>1679

AGTTTCCATTTGCAAAGTGCTACTGCTGTTCTAAAGAAGCCACATTTCTAATAAATGATT  
GCTTAATCCTGTGATGCTGCCACAGCCCCACAGAGTTTGGGAATGTTTGGGAATTCCTT

CTGAAGTGTGTGCCGCATTCT

>1680

GCTGTTCTAAAGAAGCCACATTTCTAATAAATGATTGCTTAATCCTGTGATGCTGCCACA  
GCCCCACAGAGTTTGGGAATGTTTGGGAATTCTTTCTGAAGTGTGTGCCGCATTCTTTT  
GCTTTGCCTTTTGGGAGGGTA

>1681

ATGATTGCTTAATCCTGTGATGCTGCCACAGCCCCACAGAGTTTGGGAATGTTTGGGAA  
TTCTTTCTGAAGTGTGTGCCGCATTCTTTTGCTTTGCCTTTTGGGAGGGTAGATGTGACT  
ATTGGAAATGGTCAAAATAAT

>1682

GATTGCTTAATCCTGTGATGCTGCCACAGCCCCACAGAGTTTGGGAATGTTTGGGAATT  
CTTTCTGAAGTGTGTGCCGCATTCTTTTGCTTTGCCTTTTGGGAGGGTAGATGTGACTAT  
TGGAAATGGTCAAAATAATGC

>1683

AGAGTTTGGGAATGTTTGGGAATTCTTTCTGAAGTGTGTGCCGCATTCTTTTGCTTTGC  
CTTTTGGGAGGGTAGATGTGACTATTGGAAATGGTCAAAATAATGCAGTAGCAAATCTG  
TTGACTATAGTGAGTGATAAGC

>1684

TTCTTTCTGAAGTGTGTGCCGCATTCTTTTGCTTTGCCTTTTGGGAGGGTAGATGTGACT  
ATTGGAAATGGTCAAAATAATGCAGTAGCAAATCTGTTGACTATAGTGAGTGATAAGCA  
CTGTCGGCTGCTGTGTCTGAC

>1685

TGTGCCGCATTCTTTTGCTTTGCCTTTTGGGAGGGTAGATGTGACTATTGGAAATGGTC  
AAAATAATGCAGTAGCAAATCTGTTGACTATAGTGAGTGATAAGCACTGTCGGCTGCTG  
TGTCTGACTCGGAAGGCAGATT

>1686

CTTTTGCTTTGCCTTTTGGGAGGGTAGATGTGACTATTGGAAATGGTCAAAATAATGCA  
GTAGCAAATCTGTTGACTATAGTGAGTGATAAGCACTGTCGGCTGCTGTGTCTGACTCG  
GAAGGCAGATTCTGGAAGGGGT

>1687

TTGGAAATGGTCAAAATAATGCAGTAGCAAATCTGTTGACTATAGTGAGTGATAAGCAC  
TGTCGGCTGCTGTGTCTGACTCGGAAGGCAGATTCTGGAAGGGGTGTGTGGGGAAGG  
CTTGTTGGCTCAGCACTGGGGTGTA

>1688

GGAAATGGTCAAAATAATGCAGTAGCAAATCTGTTGACTATAGTGAGTGATAAGCACTG  
TCGGCTGCTGTGTCTGACTCGGAAGGCAGATTCTGGAAGGGGTGTGTGGGGAAGGCT  
TGTTGGCTCAGCACTGGGGTGAGT

>1689

CTGTTGACTATAGTGAGTGATAAGCACTGTCGGCTGCTGTGTCTGACTCGGAAGGCAG  
ATTCTGGAAGGGGTGTGTGGGGAAGGCTTGTTGGCTCAGCACTGGGGTGAGTGTTGG  
CCTCACTTCTTAGGTGGGAAGTGGA

>1690

TGATAAGCACTGTCGGCTGCTGTGTCTGACTCGGAAGGCAGATTCTGGAAGGGGTGTG  
TGGGGAAGGCTTGTTGGCTCAGCACTGGGGTGAGTGTTGGCCTCACTTCTTAGGTGGG



AAGTGGACAAGGCCAAGGGGCTTT

>1691

TGCTGTGTCTGACTCGGAAGGCAGATTCTGGAAGGGGTGTGTGGGGAAGGCTTGTTG  
GCTCAGCACTGGGGTGAGTGTTGGCCTCACTTCTTAGGTGGGAAGTGGACAAGGCCA  
AGGGGCTTTTGATTCCAGCTACTAT

>1692

GTGTCTGACTCGGAAGGCAGATTCTGGAAGGGGTGTGTGGGGAAGGCTTGTTGGCTC  
AGCACTGGGGTGAGTGTTGGCCTCACTTCTTAGGTGGGAAGTGGACAAGGCCAAGGG  
GCTTTTGATTCCAGCTACTATGGCT

>1693

ATTCTGGAAGGGGTGTGTGGGGAAGGCTTGTTGGCTCAGCACTGGGGTGAGTGTTGG  
CCTCACTTCTTAGGTGGGAAGTGGACAAGGCCAAGGGGCTTTTGATTCCAGCTACTAT  
GGCTGGACTCCCAGTGAGGAAGGA

>1694

TCACTTCTTAGGTGGGAAGTGGACAAGGCCAAGGGGCTTTTGATTCCAGCTACTATG  
GCTGGACTCCCAGTGAGGAAGGAGTCGCTGCCATGGATTGCCTGGGACTGGGAAGAC  
TCCTTTTAACTGCTGTAATGTTTCT

>1695

GTGGGAAGTGGACAAGGCCAAGGGGCTTTTGATTCCAGCTACTATGGCTGGACTCCC  
AGTGAGGAAGGAGTCGCTGCCATGGATTGCCTGGGACTGGGAAGACTCCTTTTAACTG  
CTGTAATGTTTCTGCATTTGTGGT

>1696

CTGGACTCCCAGTGAGGAAGGAGTCGCTGCCATGGATTGCCTGGGACTGGGAAGACT  
CCTTTTAACTGCTGTAATGTTTCTGCATTTGTGGTTTGGCCTCCTGTGAGTTTGGGCTCC  
GGGGCGGCACTTCTGTTGTAAA

>1697

CTCCCAGTGAGGAAGGAGTCGCTGCCATGGATTGCCTGGGACTGGGAAGACTCCTTTT  
AACTGCTGTAATGTTTCTGCATTTGTGGTTTGGCCTCCTGTGAGTTTGGGCTCCGGGGC  
GGCACTTCTGTTGTAAAAGAAC

>1698

TGATTGCCTGGGACTGGGAAGACTCCTTTTAACTGCTGTAATGTTTCTGCATTTGTGG  
TTTGGCCTCCTGTGAGTTTGGGCTCCGGGGCGGCACTTCTGTTGTAAAAGAACAGAA  
AAGAAAACAAAACAAAACAAAAA

>1699

TTGCCTGGGACTGGGAAGACTCCTTTTAACTGCTGTAATGTTTCTGCATTTGTGGTTTG  
GCCTCCTGTGAGTTTGGGCTCCGGGGCGGCACTTCTGTTGTAAAAGAACAGAAAAG  
AAAACAAAACAAAACAAAAACCA

>1700

TAACTGCTGTAATGTTTCTGCATTTGTGGTTTGGCCTCCTGTGAGTTTGGGCTCCGGG  
GCGGCACTTCTGTTGTAAAAGAACAGAAAAGAAAACAAAACAAAAACCA  
GGACTGTCACTGTTAGATGTTGGTT

>1701

GGCTCCGGGGCGGCACTTCTGTTGTAAAAGAACAGAAAAGAAAACAAAACAAAAC  
AAAAAACCAGGACTGTCACTGTTAGATGTTGGTTGAGGCTAGAAAGAATGGATTGAGT

TTTGACCCCCTACACCCCAGGGAGTA

>1702

GGGGCGGCACTTCTGTTGTTAAAAGAACAGAAAAGAAAACAAAACAAAAA  
CCAGGACTGTCAGTGTAGATGTTGGTTGAGGCTAGAAAGAATGGATTGAGTTTTGAC  
CCCCTACACCCCAGGGAGTAGGGAGG

>1703

AAACAAAACAAAACAAAAAACCAGGACTGTCAGTGTAGATGTTGGTTGAGGCTAGA  
AAGAATGGATTGAGTTTTGACCCCCTACACCCCAGGGAGTAGGGAGGCCTGGGAGGC  
ACAGTGGCCTGAGTTTGAATTCTGAC

>1704

ACTGTCAGTGTAGATGTTGGTTGAGGCTAGAAAGAATGGATTGAGTTTTGACCCCCTA  
CACCCCAGGGAGTAGGGAGGCCTGGGAGGCACAGTGGCCTGAGTTTGAATTCTGACT  
CTGCCTCTTTGGAAGGCTCTGGAA

>1705

TGAGGCTAGAAAGAATGGATTGAGTTTTGACCCCCTACACCCCAGGGAGTAGGGAGGC  
CTGGGAGGCACAGTGGCCTGAGTTTGAATTCTGACTCTGCCTCTTTGGAAGGCTCTGG  
AAGGTTAAAGGAGCTTGTGTGTC

>1706

AAAGAATGGATTGAGTTTTGACCCCCTACACCCCAGGGAGTAGGGAGGCCTGGGAGG  
CACAGTGGCCTGAGTTTGAATTCTGACTCTGCCTCTTTGGAAGGCTCTGGAAGGTAA  
AGGAGCTTGTGTGTTCAAATCTTAG

>1707

TAGGGAGGCCTGGGAGGCACAGTGGCCTGAGTTTGAATTCTGACTCTGCCTCTTTGGA  
AGGCTCTGGAAGGTAAAGGAGCTTGTGTGTTCAAATCTTAGCCTGGTACCTGGCATAT  
ACTCAGCATGTATTTTTTCCCCT

>1708

GAGGCACAGTGGCCTGAGTTTGAATTCTGACTCTGCCTCTTTGGAAGGCTCTGGAAGG  
TTAAAGGAGCTTGTGTGTTCAAATCTTAGCCTGGTACCTGGCATATACTCAGCATGTATT  
TTTTCCCCTTTCCTGACAATGT

>1709

CACAGTGGCCTGAGTTTGAATTCTGACTCTGCCTCTTTGGAAGGCTCTGGAAGGTAA  
AGGAGCTTGTGTGTTCAAATCTTAGCCTGGTACCTGGCATATACTCAGCATGTATTTTTT  
CCCCTTTCCTGACAATGTTTCCT

>1710

GAATTCTGACTCTGCCTCTTTGGAAGGCTCTGGAAGGTAAAGGAGCTTGTGTGTTCA  
AATCTTAGCCTGGTACCTGGCATATACTCAGCATGTATTTTTTCCCCTTTCCTGACAATGT  
TCCTTGCCCCGAACACTTGAA

>1711

GAAGGCTCTGGAAGGTAAAGGAGCTTGTGTGTTCAAATCTTAGCCTGGTACCTGGCA  
TATACTCAGCATGTATTTTTTCCCCTTTCCTGACAATGTTTCCTTGCCCCGAACACTTGAA  
TAGTGGAGAGAGGAATGTTTGC

>1712

TTGTGTGTTCAAATCTTAGCCTGGTACCTGGCATATACTCAGCATGTATTTTTTCCCCTT  
CCTGACAATGTTTCCTTGCCCCGAACACTTGAATAGTGGAGAGAGGAATGTTTGCTTTTC

CTCTCCATTGAACCAACACT

>1713

ACCTGGCATATACTCAGCATGTATTTTTTCCCCTTTCTGACAATGTTCTTGCCCCGAA  
CACTTGAATAGTGGAGAGAGGAATGTTTGCTTTTCCTCTCCATTGAACCAACACTCGCC  
CATCCACTGAGCCCAAGATTG

>1714

CAGCATGTATTTTTTCCCCTTTCTGACAATGTTCTTGCCCCGAACACTTGAATAGTGG  
AGAGAGGAATGTTTGCTTTTCCTCTCCATTGAACCAACACTCGCCCATCCACTGAGCCC  
AAGATTCACCTTAGGATTGTC

>1715

AATGTTTGCTTTTCCTCTCCATTGAACCAACACTCGCCCATCCACTGAGCCCAAGATTG  
ACCTTAGGATTGTCTGTTGGACTCGGCTCTTTTGTGACCTAACAGTGCAGGGGCCTTGT  
GCTGAGCTGCACATGCTCGCTC

>1716

TTTGCTTTTCCTCTCCATTGAACCAACACTCGCCCATCCACTGAGCCCAAGATTCACCT  
TAGGATTGTCTGTTGGACTCGGCTCTTTTGTGACCTAACAGTGCAGGGGCCTTGTGCTG  
AGCTGCACATGCTCGCTCTCGC

>1717

TGAACCAACACTCGCCCATCCACTGAGCCCAAGATTCACCTTAGGATTGTCTGTTGGA  
CTCGGCTCTTTTGTGACCTAACAGTGCAGGGGCCTTGTGCTGAGCTGCACATGCTCGC  
TCTCGCTGGTGCTCCCTCTCTCTC

>1718

TCGCCCATCCACTGAGCCCAAGATTCACCTTAGGATTGTCTGTTGGACTCGGCTCTTTT  
GTGACCTAACAGTGCAGGGGCCTTGTGCTGAGCTGCACATGCTCGCTCTCGCTGGTGC  
TCCCTCTCTCTCTCTCTCTGT

>1719

TGGACTCGGCTCTTTTGTGACCTAACAGTGCAGGGGCCTTGTGCTGAGCTGCACATGC  
TCGCTCTCGCTGGTGCTCCCTCTCTCTCTCTCTGTCTGCATTATTTATAGTAAACCA  
TATTAGAACAGAGTGTTAAAG

>1720

CAGTGCAGGGGCCTTGTGCTGAGCTGCACATGCTCGCTCTCGCTGGTGCTCCCTCTCT  
CTCTCTCTCTCTGTCTGCATTATTTATAGTAAACCATATTAGAACAGAGTGTTAAAGAGG  
AAGGATGAGTCATTCCCATTTGA

>1721

TGCTGAGCTGCACATGCTCGCTCTCGCTGGTGCTCCCTCTCTCTCTCTCTCTGTCTG  
CATTATTTATAGTAAACCATATTAGAACAGAGTGTTAAAGAGGAAGGATGAGTCATTCC  
CATTGAAACCATTTGATGACATA

>1722

CTCTCGCTGGTGCTCCCTCTCTCTCTCTCTCTGTCTGCATTATTTATAGTAAACCATAT  
TAGAACAGAGTGTTAAAGAGGAAGGATGAGTCATTCCCATTTGAAACCATTTGATGACAT  
AAATAAAAGCAAAATGCTTAC

>1723

CTCGCTGGTGCTCCCTCTCTCTCTCTCTCTGTCTGCATTATTTATAGTAAACCATATTA  
GAACAGAGTGTTAAAGAGGAAGGATGAGTCATTCCCATTTGAAACCATTTGATGACATAA

ATAAAAGCAAAATGCTTACTA

>1724

CTCTCTCTCTCTGTCTGCATTATTTATAGTAAACCATATTAGAACAGAGTGTTAAAGA  
GGAAGGATGAGTCATTCCCATTGAAACCATTGATGACATAAATAAAAGCAAAATGCTTA  
CTATGTGTTTTGTGCAGTATT

>1725

TTAAAGAGGAAGGATGAGTCATTCCCATTGAAACCATTGATGACATAAATAAAAGCAA  
AATGCTTACTATGTGTTTTGTGCAGTATTTAAGGCCAGGTTGTGCTAATTTGAATGCTCC  
CAAACCTGGATCTGTGAAAGCAT

>1726

AAAGAGGAAGGATGAGTCATTCCCATTGAAACCATTGATGACATAAATAAAAGCAAAA  
TGCTTACTATGTGTTTTGTGCAGTATTTAAGGCCAGGTTGTGCTAATTTGAATGCTCCCA  
AACTGGATCTGTGAAAGCATAC

>1727

ATTGAAACCATTGATGACATAAATAAAAGCAAAATGCTTACTATGTGTTTTGTGCAGTAT  
TTAAGGCCAGGTTGTGCTAATTTGAATGCTCCCAAACCTGGATCTGTGAAAGCATACATA  
TGTGGGAAAAAATTCAGGTTT

>1728

TGCTTACTATGTGTTTTGTGCAGTATTTAAGGCCAGGTTGTGCTAATTTGAATGCTCCCA  
AACTGGATCTGTGAAAGCATACATATGTGGGAAAAAATTCAGGTTTAACTAGAGGGAA  
GTTATTTATTGAAAATCCATTT

>1729

TGTGCAGTATTTAAGGCCAGGTTGTGCTAATTTGAATGCTCCCAAACCTGGATCTGTGAA  
AGCATACATATGTGGGAAAAAATTCAGGTTTAACTAGAGGGAAGTTATTTATTGAAAAT  
CCATTTCACTATCTGCTTTCTC

>1730

TGAATGCTCCCAAACCTGGATCTGTGAAAGCATACATATGTGGGAAAAAATTCAGGTTTA  
ACTAGAGGGAAGTTATTTATTGAAAATCCATTTCACTATCTGCTTTCTCCCTTCTATTTAC  
TTCAGATCCATATTCATATC

>1731

GAAAGCATACATATGTGGGAAAAAATTCAGGTTTAACTAGAGGGAAGTTATTTATTGAA  
AATCCATTTCACTATCTGCTTTCTCCCTTCTATTTACTTCAGATCCATATTCATATCATGCT  
TGTTGTTCTGGCTAACGAG

>1732

TATTGAAAATCCATTTCACTATCTGCTTTCTCCCTTCTATTTACTTCAGATCCATATTCATA  
TCATGCTTGTTGTTCTGGCTAACGAGAGGGACTGGCTTATTCCTAGCTAAGGTTTGTT  
TATTTTCGGAAGGTTGAGG

>1733

TGAAAATCCATTTCACTATCTGCTTTCTCCCTTCTATTTACTTCAGATCCATATTCATATCA  
TGCTTGTTGTTCTGGCTAACGAGAGGGACTGGCTTATTCCTAGCTAAGGTTTGTTTATT  
TTCGGAAGGTTGAGGAAT

>1734

TTCAGATCCATATTCATATCATGCTTGTTGTTCTGGCTAACGAGAGGGACTGGCTTATTC  
ACTAGCTAAGGTTTGTTTATTTTCGGAAGGTTGAGGAATAGCACAGAGAGGTTGTCTAA

GTGTCCCTGTCTCCATTCCTC

>1735

GATCCATATTCATATCATGCTTGTTGTTCTGGCTAACGAGAGGGACTGGCTTATTCACTA  
GCTAAGGTTTGTATTATTTTCGGAAGGTTGAGGAATAGCACAGAGAGGTTGTCTAAGTG  
TCCCTGTCTCCATTCCTCCTCT

>1736

CATGCTTGTTGTTCTGGCTAACGAGAGGGACTGGCTTATTCACTAGCTAAGGTTTGT  
ATTTTCGGAAGGTTGAGGAATAGCACAGAGAGGTTGTCTAAGTGTCCCTGTCTCCATTC  
CTCCTCTTGCCACCTGTTGAGG

>1737

GAGGGACTGGCTTATTCACTAGCTAAGGTTTGTATTATTTTCGGAAGGTTGAGGAATAGC  
ACAGAGAGGTTGTCTAAGTGTCCCTGTCTCCATTCCTCCTCTTGCCACCTGTTGAGGAA  
GGCACTCTCCACCTGCTTTGCA

>1738

TTCCTAGCTAAGGTTTGTATTATTTTCGGAAGGTTGAGGAATAGCACAGAGAGGTTGTC  
TAAGTGTCCCTGTCTCCATTCCTCCTCTTGCCACCTGTTGAGGAAGGCACTCTCCACCT  
GCTTTGCAGGCGTGGGCTCTCA

>1739

TCGGAAGGTTGAGGAATAGCACAGAGAGGTTGTCTAAGTGTCCCTGTCTCCATTCCTC  
CTCTTGCCACCTGTTGAGGAAGGCACTCTCCACCTGCTTTGCAGGCGTGGGCTCTCAA  
TGTGTCCAAGAATCACAGTCAGAG

>1740

TAAGTGTCCCTGTCTCCATTCCTCCTCTTGCCACCTGTTGAGGAAGGCACTCTCCACCT  
GCTTTGCAGGCGTGGGCTCTCAATGTGTCCAAGAATCACAGTCAGAGCTGAAGGGCCC  
TTGGAATCATTATTGCAGCATG

>1741

CTCCATTCCTCCTCTTGCCACCTGTTGAGGAAGGCACTCTCCACCTGCTTTGCAGGCGT  
GGGCTCTCAATGTGTCCAAGAATCACAGTCAGAGCTGAAGGGCCCTTGGAATCATTTA  
TTGCAGCATGCTCATTTGGGAGG

>1742

GCCACCTGTTGAGGAAGGCACTCTCCACCTGCTTTGCAGGCGTGGGCTCTCAATGTGT  
CCAAGAATCACAGTCAGAGCTGAAGGGCCCTTGGAATCATTATTGCAGCATGCTCATT  
TGGGAGGAGTAAGTGGAGGTCCA

>1743

TGTCCAAGAATCACAGTCAGAGCTGAAGGGCCCTTGGAATCATTATTGCAGCATGCTC  
ATTTGGGAGGAGTAAGTGGAGGTCCAGAGAGGTTCTGTGATTTCCCTAGGTACACACA  
GCAAGCTAGAGGCAAAACCAGGA

>1744

CAAGAATCACAGTCAGAGCTGAAGGGCCCTTGGAATCATTATTGCAGCATGCTCATTT  
GGGAGGAGTAAGTGGAGGTCCAGAGAGGTTCTGTGATTTCCCTAGGTACACAGCA  
AGCTAGAGGCAAAACCAGGACCCT

>1745

TCATTATTGCAGCATGCTCATTTGGGAGGAGTAAGTGGAGGTCCAGAGAGGTTCTGT  
GATTTTCCTAGGTACACAGCAAGCTAGAGGCAAAACCAGGACCCTCACTCCCAGCC

CACTTTAATTCTTCCTTCACAAGC

>1746

CAGCAAGCTAGAGGCCAAAACCAGGACCCTCACTCCCAGCCCACCTTTAATTCTTCCTTC  
ACAAGCCTGCCTGTGACTGCCCAGGTCTGTTCTCTGCTTCTACCAAGGGGTAGGCAAG  
ACTAGAATCTGACTTGAGAGCAGT

>1747

GGCAAAACCAGGACCCTCACTCCCAGCCCACCTTTAATTCTTCCTTCACAAGCCTGCCT  
GTGACTGCCCAGGTCTGTTCTCTGCTTCTACCAAGGGGTAGGCAAGACTAGAATCTGA  
CTTGAGAGCAGTTTCAGATCTTTG

>1748

GCCCACCTTTAATTCTTCCTTCACAAGCCTGCCTGTGACTGCCCAGGTCTGTTCTCTGCT  
TCTACCAAGGGGTAGGCAAGACTAGAATCTGACTTGAGAGCAGTTTCAGATCTTTGTC  
TGTGAGGGATGCTGGGGGGTTTC

>1749

CTGTGACTGCCCAGGTCTGTTCTCTGCTTCTACCAAGGGGTAGGCAAGACTAGAATCT  
GACTTGAGAGCAGTTTCAGATCTTTGTCTGTGAGGGATGCTGGGGGGTTTCTGGCATG  
GTGACTTGCCTCCTGGGACACTCA

>1750

GGTCTGTTCTCTGCTTCTACCAAGGGGTAGGCAAGACTAGAATCTGACTTGAGAGCAG  
TTTCAGATCTTTGTCTGTGAGGGATGCTGGGGGGTTTCTGGCATGGTGACTTGCCTCCT  
GGGACACTCATTAACCTCTCTGC

>1751

AAGGGGTAGGCAAGACTAGAATCTGACTTGAGAGCAGTTTCAGATCTTTGTCTGTGAG  
GGATGCTGGGGGGTTTCTGGCATGGTGACTTGCCTCCTGGGACACTCATTAACCTCTCT  
GCTGCTGAGCCTGAGCAGACTAA

>1752

AGACTAGAATCTGACTTGAGAGCAGTTTCAGATCTTTGTCTGTGAGGGATGCTGGGGG  
GTTTCTGGCATGGTGACTTGCCTCCTGGGACACTCATTAACCTCTCTGCTGCTGAGCCT  
GAGCAGACTAATGTACATCAACT

>1753

TTTCTGGCATGGTGACTTGCCTCCTGGGACACTCATTAACCTCTCTGCTGCTGAGCCTG  
AGCAGACTAATGTACATCAACTCCTTAGGATTACAGACAATGCCCTATGTTGGGGGTT  
TTGAGACCCAAAGATTGCTAAG

>1754

ACCTCTCTGCTGCTGAGCCTGAGCAGACTAATGTACATCAACTCCTTAGGATTTACAGA  
CAATGCCCTATGTTGGGGGTTTTGAGACCCAAAGATTGCTAAGACATGGGACTTTTCCT  
TGAAGAGCTTATACTTTGAGTT

>1755

TGCTGCTGAGCCTGAGCAGACTAATGTACATCAACTCCTTAGGATTTACAGACAATGCC  
CTATGTTGGGGGTTTTGAGACCCAAAGATTGCTAAGACATGGGACTTTTCCTTGAAGA  
GCTTATACTTTGAGTTAAAATAT

>1756

TATGTTGGGGGTTTTGAGACCCAAAGATTGCTAAGACATGGGACTTTTCCTTGAAGAG  
CTTATACTTTGAGTTAAAATATGTATGTTGATATCTATGACAGAGAATAGGAAATGGAAA

GA CTATGATATATATATTCAGA

>1757

GTTTTGAGACCCAAAGATTGCTAAGACATGGGACTTTTCCTTGAAGAGCTTATACTTTG  
AGTTAAAATATGTATGTTGATATCTATGACAGAGAATAGGAAATGGAAAGACTATGATAT  
ATATATTCAGAGTTGAAATGA

>1758

TGAGACCCAAAGATTGCTAAGACATGGGACTTTTCCTTGAAGAGCTTATACTTTGAGTT  
AAAATATGTATGTTGATATCTATGACAGAGAATAGGAAATGGAAAGACTATGATATATATA  
TTCAGAGTTGAAATGACTTC

>1759

GT TAAAATATGTATGTTGATATCTATGACAGAGAATAGGAAATGGAAAGACTATGATATA  
TATATTCAGAGTTGAAATGACTTCTGTCTGGAGTGATTCATTTTAAATTTTAAAACCTTG  
TTGAGCACTTACTGTCTGCT

>1760

TTGATATCTATGACAGAGAATAGGAAATGGAAAGACTATGATATATATATTCAGAGTTGA  
AATGACTTCTGTCTGGAGTGATTCATTTTAAATTTTAAAACCTTGTTGAGCACTTACTGT  
CTGCTGGGCACCTGGGTAGG

>1761

ACTATGATATATATATTCAGAGTTGAAATGACTTCTGTCTGGAGTGATTCATTTTAAATTT  
TAAAACCTTGTTGAGCACTTACTGTCTGCTGGGCACCTGGGTAGGCCCTGGGAATACT  
GTGATGAGCAAGATAGACAAG

>1762

ATTCAGAGTTGAAATGACTTCTGTCTGGAGTGATTCATTTTAAATTTTAAAACCTTGTTG  
AGCACTTACTGTCTGCTGGGCACCTGGGTAGGCCCTGGGAATACTGTGATGAGCAAGA  
TAGACAAGACGTCTACCCCTCCT

>1763

CTTCTGTCTGGAGTGATTCATTTTAAATTTTAAAACCTTGTTGAGCACTTACTGTCTGCT  
GGGCACCTGGGTAGGCCCTGGGAATACTGTGATGAGCAAGATAGACAAGACGTCTACC  
CTCCTGGGGCTTTCCCTAATGGG

>1764

CATTTTAAATTTTAAAACCTTGTTGAGCACTTACTGTCTGCTGGGCACCTGGGTAGGCC  
CTGGGAATACTGTGATGAGCAAGATAGACAAGACGTCTACCCCTCCTGGGGCTTTCCCTAA  
TGGGGAAGAAAGATCCTTACTT

>1765

TGAGCACTTACTGTCTGCTGGGCACCTGGGTAGGCCCTGGGAATACTGTGATGAGCAA  
GATAGACAAGACGTCTACCCCTCCTGGGGCTTTCCCTAATGGGGAAGAAAGATCCTTACTT  
AGCTAGCAGTCCTGTCCGTA ACT

>1766

CAAGATAGACAAGACGTCTACCCCTCCTGGGGCTTTCCCTAATGGGGAAGAAAGATCCTT  
ACTTAGCTAGCAGTCCTGTCCGTA ACTGTGTAAGGGTGATTTTGATACATGTTGGGAGC  
CTGGATGAAGCAGCACATGAGTA

>1767

TAGACAAGACGTCTACCCCTCCTGGGGCTTTCCCTAATGGGGAAGAAAGATCCTTACTTAG  
CTAGCAGTCCTGTCCGTA ACTGTGTAAGGGTGATTTTGATACATGTTGGGAGCCTGGAT

GAAGCAGCACATGAGTAGGATA

>1768

GTCTACCCCTCCTGGGGCTTTCCTAATGGGGAAGAAAGATCCTTACTTAGCTAGCAGTCC  
TGTCCTGTAAGTGTGTAAGGGTGATTTTGATACATGTTGGGAGCCTGGATGAAGCAGCAC  
ATGAGTAGGATATTAAAGGATA

>1769

AATGGGGAAGAAAGATCCTTACTTAGCTAGCAGTCCTGTCCGTAAGTGTGTAAGGGTG  
ATTTTGATACATGTTGGGAGCCTGGATGAAGCAGCACATGAGTAGGATATTAAAGGATA  
AGTAGGTTTTGAAGACGGGGACA

>1770

GCAGTCCTGTCCGTAAGTGTGTAAGGGTGATTTTGATACATGTTGGGAGCCTGGATGAA  
GCAGCACATGAGTAGGATATTAAAGGATAAGTAGGTTTTGAAGACGGGGACAGAAAGA  
AGGAAAATTGTGGTCAGGGCCAG

>1771

TGTAAGGGTGATTTTGATACATGTTGGGAGCCTGGATGAAGCAGCACATGAGTAGGATA  
TTAAAGGATAAGTAGGTTTTGAAGACGGGGACAGAAAGAAGGAAAATTGTGGTCAGG  
GCCAGGGGAGAAAACAAGGAGTAA

>1772

GAAGCAGCACATGAGTAGGATATTAAAGGATAAGTAGGTTTTGAAGACGGGGACAGAA  
AGAAGGAAAATTGTGGTCAGGGCCAGGGGAGAAAACAAGGAGTAACTTTCTTTGGCA  
GGAATGAGGGTGATTCATGCTGGAA

>1773

GCAGCACATGAGTAGGATATTAAAGGATAAGTAGGTTTTGAAGACGGGGACAGAAAGA  
AGGAAAATTGTGGTCAGGGCCAGGGGAGAAAACAAGGAGTAACTTTCTTTGGCAGGA  
ATGAGGGTGATTCATGCTGGAATGG

>1774

ATAAGTAGGTTTTGAAGACGGGGACAGAAAGAAGGAAAATTGTGGTCAGGGCCAGGG  
GAGAAAACAAGGAGTAACTTTCTTTGGCAGGAATGAGGGTGATTCATGCTGGAATGGT  
AGGCTGGGGTCAGACTGTGGTGCTA

>1775

AGAAAGAAGGAAAATTGTGGTCAGGGCCAGGGGAGAAAACAAGGAGTAACTTTCTTT  
GGCAGGAATGAGGGTGATTCATGCTGGAATGGTAGGCTGGGGTCAGACTGTGGTGCTA  
TAAATGCGGGGAGAGAGATTAGAGA

>1776

GGTCAGGGCCAGGGGAGAAAACAAGGAGTAACTTTCTTTGGCAGGAATGAGGGTGAT  
TCATGCTGGAATGGTAGGCTGGGGTCAGACTGTGGTGCTATAAATGCGGGGAGAGAGA  
TTAGAGAAGGCAGCATGAAGAATGG

>1777

AGGGGAGAAAACAAGGAGTAACTTTCTTTGGCAGGAATGAGGGTGATTCATGCTGGA  
ATGGTAGGCTGGGGTCAGACTGTGGTGCTATAAATGCGGGGAGAGAGATTAGAGAAGG  
CAGCATGAAGAATGGAGAGAAAATG

>1778

TCAGACTGTGGTGCTATAAATGCGGGGAGAGAGATTAGAGAAGGCAGCATGAAGAATG  
GAGAGAAAATGAGTTTGAAGTTGAGCAGACCCGGGTTTCAGATTTTCATGCTGCCACTT



GCAAACGTGTGTGATGTTGGCCATC

>1779

GTGGTGCTATAAATGCGGGGAGAGAGATTAGAGAAGGCAGCATGAAGAATGGAGAGA  
AAATGAGTTTGAAGTTGAGCAGACCCGGGTTTCAGATTTTCATGCTGCCACTTGCAAAC  
TGTGTGATGTTGGCCATCAAGGACT

>1780

CGGGGAGAGAGATTAGAGAAGGCAGCATGAAGAATGGAGAGAAAATGAGTTTGAAGT  
TGAGCAGACCCGGGTTTCAGATTTTCATGCTGCCACTTGCAAACGTGTGTGATGTTGGCCA  
TCAAGGACTGTGAACTGGCTGGGT

>1781

GAATGGAGAGAAAATGAGTTTGAAGTTGAGCAGACCCGGGTTTCAGATTTTCATGCTGC  
CACTTGCAAACGTGTGTGATGTTGGCCATCAAGGACTGTGAACTGGCTGGGTGCAGTGG  
CTCACACCTGTCATCCCAGTGCTT

>1782

GAGAAAATGAGTTTGAAGTTGAGCAGACCCGGGTTTCAGATTTTCATGCTGCCACTTGC  
AAACTGTGTGATGTTGGCCATCAAGGACTGTGAACTGGCTGGGTGCAGTGGCTCACAC  
CTGTCATCCCAGTGCTTTGGGAGG

>1783

GTTGAGCAGACCCGGGTTTCAGATTTTCATGCTGCCACTTGCAAACGTGTGTGATGTTGG  
CCATCAAGGACTGTGAACTGGCTGGGTGCAGTGGCTCACACCTGTCATCCCAGTGCTT  
TGGGAGGCCAAGGCAGGAGGATTG

>1784

GGGTTTCAGATTTTCATGCTGCCACTTGCAAACGTGTGTGATGTTGGCCATCAAGGACTGT  
GAACTGGCTGGGTGCAGTGGCTCACACCTGTCATCCCAGTGCTTTGGGAGGCCAAGG  
CAGGAGGATTGCGTGAGGCCAGAA

>1785

CAGATTTTCATGCTGCCACTTGCAAACGTGTGTGATGTTGGCCATCAAGGACTGTGAACT  
GGCTGGGTGCAGTGGCTCACACCTGTCATCCCAGTGCTTTGGGAGGCCAAGGCAGGA  
GGATTGCGTGAGGCCAGAAGTTTG

>1786

CAAACGTGTGTGATGTTGGCCATCAAGGACTGTGAACTGGCTGGGTGCAGTGGCTCACA  
CCTGTCATCCCAGTGCTTTGGGAGGCCAAGGCAGGAGGATTGCGTGAGGCCAGAAGT  
TTGAGACTGGCTTGGGCAATATAGC

>1787

TGAACTGGCTGGGTGCAGTGGCTCACACCTGTCATCCCAGTGCTTTGGGAGGCCAAGG  
CAGGAGGATTGCGTGAGGCCAGAAGTTTGAGACTGGCTTGGGCAATATAGCGAGACG  
ATCTTTCCAAAAAAAAAAAAAAAAAAAA

>1788

GTGCAGTGGCTCACACCTGTCATCCCAGTGCTTTGGGAGGCCAAGGCAGGAGGATTGC  
GTGAGGCCAGAAGTTTGAGACTGGCTTGGGCAATATAGCGAGACGATCTTTCCAAAAA  
AAAAAAAAAAAAAAAAAATTAATAATGC

>1789

GAGACTGGCTTGGGCAATATAGCGAGACGATCTTTCCAAAAAAAAAAAAAAAAAAAAATT  
AAAAATGCAGCTGTGCATGCCATAATCCCAGCTTCTCGGGTGGCTGAAGAGGGAGGA

TGGCTTGAAC TTATAAGTTCAAGG

>1790

GATCTTTCCAAAAA AAAAAAAAAAATTA AAAATGCAGCTGTGCATGCCCATAATC  
CCAGCTTCTCGGGTGGCTGAAGAGGGAGGATGGCTTGAAC TTATAAGTTCAAGGCTGT  
GGTGAGCTATGATCACGCCACTGC

>1791

ATGCAGCTGTGCATGCCCATAATCCCAGCTTCTCGGGTGGCTGAAGAGGGAGGATGGC  
TTGAACTTATAAGTTCAAGGCTGTGGTGAGCTATGATCACGCCACTGCACTCCAGCCTG  
GGCAACAAAGTGAGACCCTATCT

>1792

GCATGCCCATAATCCCAGCTTCTCGGGTGGCTGAAGAGGGAGGATGGCTTGAAC TTATA  
AGTTCAAGGCTGTGGTGAGCTATGATCACGCCACTGCACTCCAGCCTGGGCAACAAAG  
TGAGACCCTATCTCTATTTCAA

>1793

GCTTGAAC TTATAAGTTCAAGGCTGTGGTGAGCTATGATCACGCCACTGCACTCCAGCC  
TGGGCAACAAAGTGAGACCCTATCTCTATTTCAAACAACAACAACAACAGCAA  
CACACACCATGAACTGTAGCTTCT

>1794

GGCAACAAAGTGAGACCCTATCTCTATTTCAAACAACAACAACAACAACAGCAACA  
CACACCATGAACTGTAGCTTCTTCATTCCTACAGTGCAGTTATTGTGTGGGATAGCCTG  
AGGATTTGGGGTCGTGTACTTAAC

>1795

TCTCTATTTCAAACAACAACAACAACAACAGCAACACACACCATGAACTGTAGCTTC  
TTCATTCCTACAGTGCAGTTATTGTGTGGGATAGCCTGAGGATTTGGGGTCGTGTACTTA  
ACACACTCTGCACAGTGCCTGT

>1796

ATTTCAAACAACAACAACAACAACAGCAACACACACCATGAACTGTAGCTTCTTCAT  
TCCTACAGTGCAGTTATTGTGTGGGATAGCCTGAGGATTTGGGGTCGTGTACTTAACAC  
ACTCTGCACAGTGCCTGTAACAG

>1797

AAACAACAACAACAACAACAGCAACACACACCATGAACTGTAGCTTCTTCATTCCTAC  
AGTGCAGTTATTGTGTGGGATAGCCTGAGGATTTGGGGTCGTGTACTTAACACACTCTG  
CACAGTGCCTGTAACAGTGTAGT

>1798

ACACACCATGAACTGTAGCTTCTTCATTCCTACAGTGCAGTTATTGTGTGGGATAGCCT  
GAGGATTTGGGGTCGTGTACTTAACACACTCTGCACAGTGCCTGTAACAGTGTAGTTG  
CTCAATAAATATAACTGCTGTTT

>1799

TTCTACAGTGCAGTTATTGTGTGGGATAGCCTGAGGATTTGGGGTCGTGTACTTAACA  
CACTCTGCACAGTGCCTGTAACAGTGTAGTTGCTCAATAAATATAACTGCTGTTTGT  
AACTGCTGTTTCTTTTGGAC

>1800

CAGTGCAGTTATTGTGTGGGATAGCCTGAGGATTTGGGGTCGTGTACTTAACACACTCT  
GCACAGTGCCTGTAACAGTGTAGTTGCTCAATAAATATAACTGCTGTTTGTTTTAACTG

CTGTTTCTTTTTGGACTTTATC

>1801

AGTTATTGTGTGGGATAGCCTGAGGATTTGGGGTCGTGTACTTAACACACTCTGCACAG  
TGCCTGTAACAGTGTAGTTGCTCAATAAATAAAGTCTGTTTGTTTTAACTGCTGTTTC  
TTTTTGGACTTTATCCCGGGA

>1802

TGGGGTCGTGTACTTAACACACTCTGCACAGTGCCTGTAACAGTGTAGTTGCTCAATAA  
ATAAAGTCTGTTTGTTTTAACTGCTGTTTCTTTTTGGACTTTATCCCGGGAGAGTTGG  
AGCCTTGGAAGGCATTTGAAA

>1803

GTAGTTGCTCAATAAATAAAGTCTGTTTGTTTTAACTGCTGTTTCTTTTTGGACTTTAT  
CCCGGGAGAGTTGGAGCCTTGGAAGGCATTTGAAAAGGAGAGTGACGTGACTGGAGT  
GCTCCATACTGATGTGACATCC

>1804

TTTAACTGCTGTTTCTTTTTGGACTTTATCCCGGGAGAGTTGGAGCCTTGGAAGGCATT  
TGAAAAGGAGAGTGACGTGACTGGAGTGCTCCATACTGATGTGACATCCACTAGGCAT  
GTGTCTGACTGCCCCCTGCTCCT

>1805

CTTTTTGGACTTTATCCCGGGAGAGTTGGAGCCTTGGAAGGCATTTGAAAAGGAGAGT  
GACGTGACTGGAGTGCTCCATACTGATGTGACATCCACTAGGCATGTGTCTGACTGCCC  
CCTGCTCCTTCCCTGCCTTCACG

>1806

CCCGGGAGAGTTGGAGCCTTGGAAGGCATTTGAAAAGGAGAGTGACGTGACTGGAGT  
GCTCCATACTGATGTGACATCCACTAGGCATGTGTCTGACTGCCCCCTGCTCCTTCCCT  
GCCTTCACGAGCCTGTCTGAAAAG

>1807

TTGGAAGGCATTTGAAAAGGAGAGTGACGTGACTGGAGTGCTCCATACTGATGTGACA  
TCCACTAGGCATGTGTCTGACTGCCCCCTGCTCCTTCCCTGCCTTCACGAGCCTGTCTG  
AAAAGGAGTTTAGTGCGTGATCA

>1808

CCATACTGATGTGACATCCACTAGGCATGTGTCTGACTGCCCCCTGCTCCTTCCCTGCC  
TTCACGAGCCTGTCTGAAAAGGAGTTTAGTGCGTGATCATCAGCTCCTAAGGAGACCT  
CTCCCCTGTATCTTGTACCTGGC

>1809

GACATCCACTAGGCATGTGTCTGACTGCCCCCTGCTCCTTCCCTGCCTTCACGAGCCTG  
TCTGAAAAGGAGTTTAGTGCGTGATCATCAGCTCCTAAGGAGACCTCTCCCCTGTATCT  
TGTACCTGGCACTCTACCAAGA

>1810

CTGCCTTCACGAGCCTGTCTGAAAAGGAGTTTAGTGCGTGATCATCAGCTCCTAAGGA  
GACCTCTCCCCTGTATCTTGTACCTGGCACTCTACCAAGATTTGATGAAAGGACATGAA  
ATGGACCTTGCCACCTCTCGGT

>1811

CACGAGCCTGTCTGAAAAGGAGTTTAGTGCGTGATCATCAGCTCCTAAGGAGACCTCT  
CCCCTGTATCTTGTACCTGGCACTCTACCAAGATTTGATGAAAGGACATGAAATGGACC

CTTGCCACCTCTCGGTGGGCGGG

>1812

CTGTATCTTGTACCTGGCACTCTACCAAGATTTGATGAAAGGACATGAAATGGACCCTT  
GCCACCTCTCGGTGGGCGGGGAAGCTGGGAGAGGGGCCTGGGGAGAGGGGGTCTTC  
AGCTGTCAGGATCAAAGGAAGTGAC

>1813

AGGACATGAAATGGACCCTTGCCACCTCTCGGTGGGCGGGGAAGCTGGGAGAGGGGC  
CTGGGGAGAGGGGGTCTTCAGCTGTCAGGATCAAAGGAAGTGACACTCTGAAGCTGG  
TCTGCCGGACTGTTACCCGTCTCTCT

>1814

ATGGACCCTTGCCACCTCTCGGTGGGCGGGGAAGCTGGGAGAGGGGCCTGGGGAGAG  
GGGGTCTTCAGCTGTCAGGATCAAAGGAAGTGACACTCTGAAGCTGGTCTGCCGGAC  
TGTTACCCGTCTCTCTAACTCTCTTT

>1815

TCTCGGTGGGCGGGGAAGCTGGGAGAGGGGCCTGGGGAGAGGGGGTCTTCAGCTGTC  
AGGATCAAAGGAAGTGACACTCTGAAGCTGGTCTGCCGGACTGTTACCCGTCTCTCTA  
ACTCTCTTTTAATAGAAACCCAGTC

>1816

GAGAGGGGGTCTTCAGCTGTCAGGATCAAAGGAAGTGACACTCTGAAGCTGGTCTGC  
CGGACTGTTACCCGTCTCTCTAACTCTCTTTTAATAGAAACCCAGTCTCCCCTCTTGCCT  
CCCTGATAGTGAACAGCGACGCT

>1817

GAAGTGACACTCTGAAGCTGGTCTGCCGGACTGTTACCCGTCTCTCTAACTCTCTTTTA  
ATAGAAACCCAGTCTCCCCTCTTGCCTCCCTGATAGTGAACAGCGACGCTATCTCCCGC  
GGGCCAGTCTCGGCTGTGGTCG

>1818

GCCGGACTGTTACCCGTCTCTCTAACTCTCTTTTAATAGAAACCCAGTCTCCCCTCTTG  
CCTCCCTGATAGTGAACAGCGACGCTATCTCCCGCGGGCCAGTCTCGGCTGTGGTCGT  
AGCACTACGCAATGTCTGCAAAC

>1819

TTTTAATAGAAACCCAGTCTCCCCTCTTGCCTCCCTGATAGTGAACAGCGACGCTATCT  
CCCGCGGGCCAGTCTCGGCTGTGGTCGTAGCACTACGCAATGTCTGCAAACCGACAGT  
GGCATGGGGAGATAAGGGCCCCA

>1820

AAACCCAGTCTCCCCTCTTGCCTCCCTGATAGTGAACAGCGACGCTATCTCCCGCGGG  
CCAGTCTCGGCTGTGGTCGTAGCACTACGCAATGTCTGCAAACCGACAGTGGCATGGG  
GAGATAAGGGCCCCAACGTTGTGT

>1821

CTCCCTGATAGTGAACAGCGACGCTATCTCCCGCGGGCCAGTCTCGGCTGTGGTCGTA  
GCACTACGCAATGTCTGCAAACCGACAGTGGCATGGGGAGATAAGGGCCCCAACGTT  
GTGTAACGAGGGGCATGGGCTGTTT

>1822

CAGCGACGCTATCTCCCGCGGGCCAGTCTCGGCTGTGGTCGTAGCACTACGCAATGTC  
TGCAAACCGACAGTGGCATGGGGAGATAAGGGCCCCAACGTTGTGTAACGAGGGGCA

TGGGCTGTTTGCCCGAGTGGCTCCT

>1823

CTCGGCTGTGGTCGTAGCACTACGCAATGTCTGCAAACCGACAGTGGCATGGGGAGAT  
AAGGGCCCCAACGTTGTGTAAACGAGGGGCATGGGCTGTTTGCCCGAGTGGCTCCTGGC  
CCCTGGGTAACTGCTAACCTCAAC

>1824

CAATGTCTGCAAACCGACAGTGGCATGGGGAGATAAGGGCCCCAACGTTGTGTAAACG  
AGGGGCATGGGCTGTTTGCCCGAGTGGCTCCTGGCCCCCTGGGTAACTGCTAACCTCAA  
CGGAGGAGCGGGCCGGCCTTGGA

>1825

AAACCGACAGTGGCATGGGGAGATAAGGGCCCCAACGTTGTGTAAACGAGGGGCATGG  
GCTGTTTGCCCGAGTGGCTCCTGGCCCCCTGGGTAACTGCTAACCTCAACGGAGGAGCG  
GGCCGGCCTTGGAACGCCGTTCCA

>1826

GGAGATAAGGGCCCCAACGTTGTGTAAACGAGGGGCATGGGCTGTTTGCCCGAGTGGCT  
CCTGGCCCCCTGGGTAACTGCTAACCTCAACGGAGGAGCGGGCCGGCCTTGGAACGC  
CGTTCCAGGGCCCCCTCGCTGGTTCC

>1827

GCCCGAGTGGCTCCTGGCCCCCTGGGTAACTGCTAACCTCAACGGAGGAGCGGGCCGG  
CCTTGGAACGCCGTTCCAGGGCCCCCTCGCTGGTTCCACGGATGCCTTTTTGTGGTTG  
GATAAAGGAAGCTCATGTAGGCCGC

>1828

CCTGGGTAACTGCTAACCTCAACGGAGGAGCGGGCCGGCCTTGGAACGCCGTTCCA  
GGGCCCCCTCGCTGGTTCCACGGATGCCTTTTTGTGGTTGGATAAAGGAAGCTCATGTAG  
GCCGCCACAGCGCAGCATGGCCT

>1829

CGGAGGAGCGGGCCGGCCTTGGAACGCCGTTCCAGGGCCCCCTCGCTGGTTCCACGG  
ATGCCTTTTTGTGGTTGGATAAAGGAAGCTCATGTAGGCCGCCACAGCGCAGCATGG  
CCTTGGGCTACGGGTGTTTGTTGT

>1830

GGAAACGCCGTTCCAGGGCCCCCTCGCTGGTTCCACGGATGCCTTTTTGTGGTTGGATA  
AAGGAAGCTCATGTAGGCCGCCACAGCGCAGCATGGCCTTGGGCTACGGGTGTTTG  
TTGTTTTGTTTTCTCTTTCTTT

>1831

TGCCTTTTTGTGGTTGGATAAAGGAAGCTCATGTAGGCCGCCACAGCGCAGCATGGC  
CTTGGGCTACGGGTGTTTGTTGTTTTGTTTTCTCTTTCTTTGTCTTTTTTAAAAAA  
GAAGTTGAAAGGGGGATAGTCT

>1832

CCTTTTTGTGGTTGGATAAAGGAAGCTCATGTAGGCCGCCACAGCGCAGCATGGCCT  
TGGGCTACGGGTGTTTGTTGTTTTGTTTTCTCTTTCTTTGTCTTTTTTAAAAAAGA  
AGTTGAAAGGGGGATAGTCTTG

>1833

TTGTGGTTGGATAAAGGAAGCTCATGTAGGCCGCCACAGCGCAGCATGGCCTTGGGC  
TACGGGTGTTTGTTGTTTTGTTTTCTCTTTCTTTGTCTTTTTTAAAAAAGAAGTTG

AAAGGGGGATAGTCTTGCTTGG

>1834

GGATAAAGGAAGCTCATGTAGGCCGCCACAGCGCAGCATGGCCTTGGGGCTACGGGTG  
TTTGGTTGTTTTGTTTTTCTCTTTTCTTTGTCTTTTTTAAAAAAGAAGTTGAAAGGGG  
GATAGTCTTGCTTGGCACCTACC

>1835

GTAGGCCGCCACAGCGCAGCATGGCCTTGGGGCTACGGGTGTTTGGTTGTTTTGTTTT  
CTCTTTTCTTTGTCTTTTTTAAAAAAGAAGTTGAAAGGGGGATAGTCTTGCTTGGCAC  
CTACCACCTTTAACCCTAAACC

>1836

ACGGGTGTTTGGTTGTTTTGTTTTTCTCTTTTCTTTGTCTTTTTTAAAAAAGAAGTTGA  
AAGGGGGATAGTCTTGCTTGGCACCTACCACCTTTAACCCTAAACCTAAATAAAACAAA  
CAGTTCCTAAATATAAATTA

>1837

AAGAAGTTGAAAGGGGGATAGTCTTGCTTGGCACCTACCACCTTTAACCCTAAACCTAA  
ATAAAACAAACAGTTCCTAAATATAAATTAACCTTCAACCTGCAGTATAGACATCCTCCT  
TCCCTGCCCGAAACCCACTGGC

>1838

ACCTACCACCTTTAACCCTAAACCTAAATAAAACAAACAGTTCCTAAATATAAATTAAC  
TTCAACCTGCAGTATAGACATCCTCCTTCCCTGCCCGAAACCCACTGGCCACTGGAGG  
CTAGCTTTAAGAAATTGGTTTTG

>1839

CCTGCAGTATAGACATCCTCCTTCCCTGCCCGAAACCCACTGGCCACTGGAGGCTAGCT  
TTAAGAAATTGGTTTTGGAGACTCTGGCTTGAAAAGGAGCCATGCCCACTTGTCTCAC  
GTCCAGTCGCTGGCTCCAGGGG

>1840

TGGCCACTGGAGGCTAGCTTTAAGAAATTGGTTTTGGAGACTCTGGCTTGAAAAGGAG  
CCATGCCCACTTGTCTCACGTCCAGTCGCTGGCTCCAGGGGGCCGTGGTAGAACATAT  
ATTGTACTTCAGCTGCCTTTCCC

>1841

TGGAGGCTAGCTTTAAGAAATTGGTTTTGGAGACTCTGGCTTGAAAAGGAGCCATGCC  
CACTTGTCTCACGTCCAGTCGCTGGCTCCAGGGGGCCGTGGTAGAACATATATTGTAC  
TTCAGCTGCCTTTCCCCTCCAAG

>1842

TTGGAGACTCTGGCTTGAAAAGGAGCCATGCCCACTTGTCTCACGTCCAGTCGCTGG  
CTCCAGGGGGCCGTGGTAGAACATATATTGTACTTCAGCTGCCTTTCCCCTCCAAGCTT  
CCTCAGCCACCCACAGCCCTTTC

>1843

AAAAGGAGCCATGCCCACTTGTCTCACGTCCAGTCGCTGGCTCCAGGGGGCCGTGGT  
AGAACATATATTGTACTTCAGCTGCCTTTCCCCTCCAAGCTTCCTCAGCCACCCACAGC  
CCTTTCAGATGAGCTGAGCCCTA

>1844

TCAGCTGCCTTTCCCCTCCAAGCTTCCTCAGCCACCCACAGCCCTTTCAGATGAGCTG  
AGCCCTAGCACTGTGCCCTCTCCCCTCTGCCCTCTTAGGGTGATAGAATCCACTACCT

GACATCTGGGGTTGCCCTGTTCT

>1845

TCAGCCACCCACAGCCCTTTCAGATGAGCTGAGCCCTAGCACTGTGCCCTCTCCCCTCT  
GCCCTCTTAGGGTGATAGAATCCACTACCCTGACATCTGGGGTTGCCCTGTTCTGCTGT  
GGTGGGAGATGGGCTGGAAGGG

>1846

GAGCCCTAGCACTGTGCCCTCTCCCCTCTGCCCTCTTAGGGTGATAGAATCCACTACCC  
TGACATCTGGGGTTGCCCTGTTCTGCTGTGGTGGGAGATGGGCTGGAAGGGACTTCGG  
AGGCTCTCCCGTGTCTGTACCA

>1847

GCACTGTGCCCTCTCCCCTCTGCCCTCTTAGGGTGATAGAATCCACTACCCTGACATCT  
GGGGTTGCCCTGTTCTGCTGTGGTGGGAGATGGGCTGGAAGGGACTTCGGAGGCTCTC  
CCGTGTTCTGTACCACCCAGCTT

>1848

CCTGACATCTGGGGTTGCCCTGTTCTGCTGTGGTGGGAGATGGGCTGGAAGGGACTTC  
GGAGGCTCTCCCGTGTCTGTACCACCCAGCTTCCCCTTGGATCCCTCCACCCCCGCAG  
CCAGGAGAGGGAAGTAACTGTTC

>1849

TGACATCTGGGGTTGCCCTGTTCTGCTGTGGTGGGAGATGGGCTGGAAGGGACTTCGG  
AGGCTCTCCCGTGTCTGTACCACCCAGCTTCCCCTTGGATCCCTCCACCCCCGCAGCC  
AGGAGAGGGAAGTAACTGTTCTT

>1850

AGGCTCTCCCGTGTCTGTACCACCCAGCTTCCCCTTGGATCCCTCCACCCCCGCAGCC  
AGGAGAGGGAAGTAACTGTTCTTTGAGCAGGACATTTCAATTTCAAAGTATTCTTGATG  
CCGCCCCCCCCGCCCAACGCCA

>1851

TCCCGTGTCTGTACCACCCAGCTTCCCCTTGGATCCCTCCACCCCCGCAGCCAGGAG  
AGGGAAGTAACTGTTCTTTGAGCAGGACATTTCAATTTCAAAGTATTCTTGATGCCGCC  
CCCCCGCCCCACCGCCAAGAATT

>1852

TGGATCCCTCCACCCCCGCAGCCAGGAGAGGGAAGTAACTGTTCTTTGAGCAGGACAT  
TTCATTTTCAAAGTATTCTTGATGCCGCCCCCCCCGCCCAACCGCCAAGAATTCTGCTCT  
GTGGGTGATACTTATAAGGTAAC

>1853

GAGCAGGACATTTCAATTTCAAAGTATTCTTGATGCCGCCCCCCCCGCCCAACCGCCAAG  
AATTCTGCTCTGTGGGTGATACTTATAAGGTAAGTATATGGCTTCCTTATTTAGGCAGCA  
GTTTCTCTTCTATGATTTTAG

>1854

AGGACATTTCAATTTCAAAGTATTCTTGATGCCGCCCCCCCCGCCCAACCGCCAAGAATT  
CTGCTCTGTGGGTGATACTTATAAGGTAAGTATATGGCTTCCTTATTTAGGCAGCAGTTT  
CTCTTCTATGATTTTAGTTCC

>1855

CACCGCCAAGAATTCTGCTCTGTGGGTGATACTTATAAGGTAAGTATATGGCTTCCTTAT  
TTAGGCAGCAGTTTCTCTTCTATGATTTTAGTTTCCTCTCATGATTCTTATAACCTCTCTC

AGATACTTCCAGGATGATA

>1856

TGTGGGTGATACTTATAAGGTAACCTATATGGCTTCCTTATTTAGGCAGCAGTTTCTCTTCT  
ATGATTTTAGTTCCTCTCATGATTCTTATAACCCTCTCTCAGATACTTCCAGGATGATAAA  
TCTTCTATCACTGTTTCA

>1857

ATTTTAGTTCCTCTCATGATTCTTATAACCCTCTCTCAGATACTTCCAGGATGATAAATCT  
TCTATCACTGTTTCATCTGATCACATCAGGGTGATTATATTCGTGACATAACCAGGTGG  
CTTTAATCCGTTGGTGGA

>1858

CTTATAACCCTCTCTCAGATACTTCCAGGATGATAAATCTTCTATCACTGTTTCATCTGAT  
CACATCAGGGTGATTATATTCGTGACATAACCAGGTGGCTTTAATCCGTTGGTGGAAG  
AACCAGGCTCTCACCTCCAT

>1859

CTCAGATACTTCCAGGATGATAAATCTTCTATCACTGTTTCATCTGATCACATCAGGGTG  
ATTATATTCGTGACATAACCAGGTGGCTTTAATCCGTTGGTGGAAGAACCAGGCTCTC  
ACCTCCATTGTTTAAGATGTT

>1860

AGGATGATAAATCTTCTATCACTGTTTCATCTGATCACATCAGGGTGATTATATTCGTGA  
CATAACCAGGTGGCTTTAATCCGTTGGTGGAAGAACCAGGCTCTCACCTCCATTGTTTA  
AGATGTTATGTTTCTACTAA

>1861

TGATTATATTCGTGACATAACCAGGTGGCTTTAATCCGTTGGTGGAAGAACCAGGCTC  
TCACCTCCATTGTTTAAGATGTTATGTTTCTACTAATCTGTCCACTGAGTGTCTCCATCCT  
ATTGTTTCCATTGCATGCTC

>1862

TTCGTGACATAACCAGGTGGCTTTAATCCGTTGGTGGAAGAACCAGGCTCTCACCTCC  
ATTGTTTAAGATGTTATGTTTCTACTAATCTGTCCACTGAGTGTCTCCATCCTATTGTTTC  
CATTGCATGCTCTCAGGTTAT

>1863

CGTTGGTGGAAGAACCAGGCTCTCACCTCCATTGTTTAAGATGTTATGTTTCTACTAATC  
TGTCCACTGAGTGTCTCCATCCTATTGTTTCCATTGCATGCTCTCAGGTTATTTCTTTGT  
TCTTGGCTGTCTGATTGCT

>1864

AGGCTCTCACCTCCATTGTTTAAGATGTTATGTTTCTACTAATCTGTCCACTGAGTGTCT  
CCATCCTATTGTTTCCATTGCATGCTCTCAGGTTATTTCTTTGTTCTTGGCTGTCTGATT  
GCTCCCAGAGGCTGCAGTT

>1865

AAGATGTTATGTTTCTACTAATCTGTCCACTGAGTGTCTCCATCCTATTGTTTCCATTGCA  
TGCTCTCAGGTTATTTCTTTGTTCTTGGCTGTCTGATTGCTCCCAGAGGCTGCAGTTAT  
TTTATTTTATTTATTTTCA

>1866

CTGTCCACTGAGTGTCTCCATCCTATTGTTTCCATTGCATGCTCTCAGGTTATTTCTTTG  
TTCTTGGCTGTCTGATTGCTCCCAGAGGCTGCAGTTATTTTATTTTATTTATTTTCA



TGGTGGGAGTAGGGGATT

>1867

ATTGTTTCCATTGCATGCTCTCAGGTTATTTCCTTTGTCTTGGCTGTCTGATTGCTCCCA  
GAGGCTGCAGTTATTTTATTTTATTTATTTTCATTTTTTGGTGGGAGTAGGGGATTGATCTC  
TCTCTTGCCTTTAGCTTG

>1868

TCCTTTGTTCTTGGCTGTCTGATTGCTCCCAGAGGCTGCAGTTATTTTATTTTATTTATTT  
CATTTTTTGGTGGGAGTAGGGGATTGATCTCTCTCTTGCCTTTAGCTTGAATGGGTGGT  
CATTTCCAGGCTTACACATT

>1869

TTTATTTTATTTATTTTCATTTTTTGGTGGGAGTAGGGGATTGATCTCTCTCTTGCCTTTAG  
CTTGAATGGGTGGTCATTTCCAGGCTTACACATTGCTCCATGCCCCACTGTAGGGGTCTG  
GCTTAGAGATGGTCGGGGGA

>1870

ATTTTATTTATTTTCATTTTTTGGTGGGAGTAGGGGATTGATCTCTCTCTTGCCTTTAGCTT  
GAATGGGTGGTCATTTCCAGGCTTACACATTGCTCCATGCCCCACTGTAGGGGTCTGGCT  
TAGAGATGGTCGGGGGAGAG

>1871

TTGATCTCTCTCTTGCCTTTAGCTTGAATGGGTGGTCATTTCCAGGCTTACACATTGCTC  
CATGCCCCACTGTAGGGGTCTGGCTTAGAGATGGTCGGGGGAGAGAAGGTGGTGATTTA  
AAAGATTTGGAGGCGGTGGCTT

>1872

TCTCTCTTGCCTTTAGCTTGAATGGGTGGTCATTTCCAGGCTTACACATTGCTCCATGCC  
CACTGTAGGGGTCTGGCTTAGAGATGGTCGGGGGAGAGAAGGTGGTGATTTAAAAGAT  
TTGGAGGCGGTGGCTTACATTG

>1873

CTTGAATGGGTGGTCATTTCCAGGCTTACACATTGCTCCATGCCCCACTGTAGGGGTCTG  
GCTTAGAGATGGTCGGGGGAGAGAAGGTGGTGATTTAAAAGATTTGGAGGCGGTGGC  
TTACATTGATTTTAGCTTATCTAA

>1874

GCCCCACTGTAGGGGTCTGGCTTAGAGATGGTCGGGGGAGAGAAGGTGGTGATTTAAA  
AGATTTGGAGGCGGTGGCTTACATTGATTTTAGCTTATCTAACCCTTTAGCTAGAGGCTG  
CTCTTCCCTCAGAGTGTCCAAC

>1875

TTTGGAGGCGGTGGCTTACATTGATTTTAGCTTATCTAACCCTTTAGCTAGAGGCTGCTC  
TTCCCTCAGAGTGTCCAACCTAGCTGTAACCTAAAGCAACAGAGAAATGTATATCATCCC  
TTTTCTTGCATTAATTAGGGC

>1876

TGGAGGCGGTGGCTTACATTGATTTTAGCTTATCTAACCCTTTAGCTAGAGGCTGCTCTT  
CCCTCAGAGTGTCCAACCTAGCTGTAACCTAAAGCAACAGAGAAATGTATATCATCCCTT  
TTCTTGCATTAATTAGGGCTG

>1877

AACCCTTTAGCTAGAGGCTGCTCTTCCCTCAGAGTGTCCAACCTAGCTGTAACCTAAAGC  
AACAGAGAAATGTATATCATCCCTTTTCTTGCATTAATTAGGGCTGAGAAATTCATTATTT

AGAGGGATAAGAGCTCCGGA

>1878

TCCCTTTTCTTGCAATTAATTAGGGCTGAGAAATTCATTATTTAGAGGGATAAGAGCTCCG  
GAGGAGGAGGGTTTTTTGAACTAATGTAGAGATCTGTGGCCAGCTGTGTGATTCTCAG  
GTAGCAGGTGAGGGGGTGGGGG

>1879

TAATTAGGGCTGAGAAATTCATTATTTAGAGGGATAAGAGCTCCGGAGGAGGAGGGTT  
TTTTGAACTAATGTAGAGATCTGTGGCCAGCTGTGTGATTCTCAGGTAGCAGGTGAGG  
GGGTGGGGGTTGATGAGAGGGGTG

>1880

ATTATTTAGAGGGATAAGAGCTCCGGAGGAGGAGGGTTTTTTGAACTAATGTAGAGATC  
TGTGGCCAGCTGTGTGATTCTCAGGTAGCAGGTGAGGGGGTGGGGGTTGATGAGAGG  
GGTGAGAAGGAGCAGGTGCCAGGG

>1881

CTCCGGAGGAGGAGGGTTTTTTGAACTAATGTAGAGATCTGTGGCCAGCTGTGTGATT  
CTCAGGTAGCAGGTGAGGGGGTGGGGGTTGATGAGAGGGGTGAGAAGGAGCAGGTG  
CCAGGGTCAGGCAGGGGAGGGAGCCC

>1882

GAGGAGGGTTTTTTGAACTAATGTAGAGATCTGTGGCCAGCTGTGTGATTCTCAGGTAG  
CAGGTGAGGGGGTGGGGGTTGATGAGAGGGGTGAGAAGGAGCAGGTGCCAGGGTCA  
GGCAGGGGAGGGAGCCCCACTCCG

>1883

AATGTAGAGATCTGTGGCCAGCTGTGTGATTCTCAGGTAGCAGGTGAGGGGGTGGGGG  
TTGATGAGAGGGGTGAGAAGGAGCAGGTGCCAGGGTCAGGCAGGGGAGGGAGCCCC  
CACTCCGTGCATCATCCCAGAGCCCT

>1884

GGTGGGGGTTGATGAGAGGGGTGAGAAGGAGCAGGTGCCAGGGTCAGGCAGGGGAG  
GGAGCCCCCACTCCGTGCATCATCCCAGAGCCCTGTTCCCTCCAAGCCCAGATTAGACA  
CCCTTCTCCACGTGGGGCCTCAAGTT

>1885

GTGAGAAGGAGCAGGTGCCAGGGTCAGGCAGGGGAGGGAGCCCCCACTCCGTGCAT  
CATCCCAGAGCCCTGTTCCCTCCAAGCCCAGATTAGACACCCTTCTCCACGTGGGGCCT  
CAAGTTAGAAATCCTGGGAGGAGGCC

>1886

GGGAGCCCCCACTCCGTGCATCATCCCAGAGCCCTGTTCCCTCCAAGCCCAGATTAGAC  
ACCCTTCTCCACGTGGGGCCTCAAGTTAGAAATCCTGGGAGGAGGCCTTATTGCTCAG  
GATCATCTGGGAATGTTGCTTTCT

>1887

TCCGTGCATCATCCCAGAGCCCTGTTCCCTCCAAGCCCAGATTAGACACCCTTCTCCACG  
TGGGGCCTCAAGTTAGAAATCCTGGGAGGAGGCCTTATTGCTCAGGATCATCTGGGAA  
TGTTGCTTTCTGGGTTTAAAATA

>1888

CCTTCTCCACGTGGGGCCTCAAGTTAGAAATCCTGGGAGGAGGCCTTATTGCTCAGGA  
TCATCTGGGAATGTTGCTTTCTGGGTTTAAAATACAGTCAATGTTTAGATGAGCTGCTGT

TCAGGCACATGGTCTGGTTAGC

>1889

GGGGCCTCAAGTTAGAAATCCTGGGAGGAGGCCTTATTGCTCAGGATCATCTGGGAAT  
GTTGCTTTCTGGGTTTAAAATACAGTCAATGTTTAGATGAGCTGCTGTTTCAGGCACATG  
GTCTGGTTAGCAAAGGGTTAAAT

>1890

TATTGCTCAGGATCATCTGGGAATGTTGCTTTCTGGGTTTAAAATACAGTCAATGTTTAG  
ATGAGCTGCTGTTTCAGGCACATGGTCTGGTTAGCAAAGGGTTAAATCCTGCATCCCGTT  
TTTAGTCATCAAGCTAGCTCA

>1891

CATCTGGGAATGTTGCTTTCTGGGTTTAAAATACAGTCAATGTTTAGATGAGCTGCTGTT  
CAGGCACATGGTCTGGTTAGCAAAGGGTTAAATCCTGCATCCCGTTTTTAGTCATCAAG  
CTAGCTCAGATCTGCCCACCT

>1892

TTTCTGGGTTTAAAATACAGTCAATGTTTAGATGAGCTGCTGTTTCAGGCACATGGTCTG  
GTTAGCAAAGGGTTAAATCCTGCATCCCGTTTTTAGTCATCAAGCTAGCTCAGATCTGC  
CCACCTTGGAGCCCTGTGCTTT

>1893

TGTTTAGATGAGCTGCTGTTTCAGGCACATGGTCTGGTTAGCAAAGGGTTAAATCCTGCA  
TCCCGTTTTTAGTCATCAAGCTAGCTCAGATCTGCCCACCTTGGAGCCCTGTGCTTTCC  
TGCCTTAGTGGGCAGAGTCTAG

>1894

GCAAAGGGTTAAATCCTGCATCCCGTTTTTAGTCATCAAGCTAGCTCAGATCTGCCCAC  
CTTGGAGCCCTGTGCTTTTCCTGCCTTAGTGGGCAGAGTCTAGGGGACCTGTGGCATGT  
TCAATGATTGAGGACTCTTGTCC

>1895

TGCATCCCGTTTTTAGTCATCAAGCTAGCTCAGATCTGCCCACCTTGGAGCCCTGTGCT  
TTCCTGCCTTAGTGGGCAGAGTCTAGGGGACCTGTGGCATGTTCAATGATTGAGGACT  
CTTGTCCAGATTCCAAAAACCTA

>1896

TTTTTAGTCATCAAGCTAGCTCAGATCTGCCCACCTTGGAGCCCTGTGCTTTCCTGCCTT  
AGTGGGCAGAGTCTAGGGGACCTGTGGCATGTTCAATGATTGAGGACTCTTGTCCAGA  
TTCCAAAAACCTACTGTGATGA

>1897

AGCTAGCTCAGATCTGCCCACCTTGGAGCCCTGTGCTTTCCTGCCTTAGTGGGCAGAG  
TCTAGGGGACCTGTGGCATGTTCAATGATTGAGGACTCTTGTCCAGATTCCAAAAACCT  
ACTGTGATGATGCTGTTCTGAAG

>1898

TCAGATCTGCCCACCTTGGAGCCCTGTGCTTTCCTGCCTTAGTGGGCAGAGTCTAGGG  
GACCTGTGGCATGTTCAATGATTGAGGACTCTTGTCCAGATTCCAAAAACCTACTGTGA  
TGATGCTGTTCTGAAGCTGTGGT

>1899

CCCTGTGCTTTCCTGCCTTAGTGGGCAGAGTCTAGGGGACCTGTGGCATGTTCAATGAT  
TGAGGACTCTTGTCCAGATTCCAAAAACCTACTGTGATGATGCTGTTCTGAAGCTGTGG

TAGGCGGTGATTGAGTGGAGTG

>1900

GGGCAGAGTCTAGGGGACCTGTGGCATGTTCAATGATTGAGGACTCTTGTCCAGATTC  
CAAAAACCTACTGTGATGATGCTGTTCTGAAGCTGTGGTAGGCGGTGATTGAGTGGAG  
TGTGTAGTGACCCTCAGGAATTCT

>1901

AGGGGACCTGTGGCATGTTCAATGATTGAGGACTCTTGTCCAGATTCCAAAAACCTAC  
TGTGATGATGCTGTTCTGAAGCTGTGGTAGGCGGTGATTGAGTGGAGTGTGTAGTGAC  
CCTCAGGAATTCTTCAGAAGTTAG

>1902

GGCATGTTCAATGATTGAGGACTCTTGTCCAGATTCCAAAAACCTACTGTGATGATGCT  
GTTCTGAAGCTGTGGTAGGCGGTGATTGAGTGGAGTGTGTAGTGACCCTCAGGAATTC  
TTCAGAAGTTAGGATTTTGACGA

>1903

CTTGTCCAGATTCCAAAAACCTACTGTGATGATGCTGTTCTGAAGCTGTGGTAGGCGGT  
GATTGAGTGGAGTGTGTAGTGACCCTCAGGAATTCTTCAGAAGTTAGGATTTTGACGAT  
ACCTCTGATAAGTTGGGTTTTT

>1904

ATGCTGTTCTGAAGCTGTGGTAGGCGGTGATTGAGTGGAGTGTGTAGTGACCCTCAGG  
AATTCTTCAGAAGTTAGGATTTTGACGATACCTCTGATAAGTTGGGTTTTTAATTTGCTG  
GTTTATCTTAGAGTGGAGGCTG

>1905

GATTGAGTGGAGTGTGTAGTGACCCTCAGGAATTCTTCAGAAGTTAGGATTTTGACGAT  
ACCTCTGATAAGTTGGGTTTTTAATTTGCTGGTTTATCTTAGAGTGGAGGCTGTGGCCC  
ACAGCAAGTAGTACATTTTCCA

>1906

GACCCTCAGGAATTCTTCAGAAGTTAGGATTTTGACGATACCTCTGATAAGTTGGGTTT  
TTAATTTGCTGGTTTATCTTAGAGTGGAGGCTGTGGCCACAGCAAGTAGTACATTTTC  
CATCTCAGCCCAGTGCATGGAC

>1907

TTCTTCAGAAGTTAGGATTTTGACGATACCTCTGATAAGTTGGGTTTTTAATTTGCTGGT  
TTATCTTAGAGTGGAGGCTGTGGCCACAGCAAGTAGTACATTTTCCATCTCAGCCCAG  
TGCATGGACAAACGTACCTCA

>1908

CGATACCTCTGATAAGTTGGGTTTTTAATTTGCTGGTTTATCTTAGAGTGGAGGCTGTGG  
CCCACAGCAAGTAGTACATTTTCCATCTCAGCCCAGTGCATGGACAAACGTACCTCAA  
ACCAAAGGTTCAATGAAGCTCT

>1909

TAATTTGCTGGTTTATCTTAGAGTGGAGGCTGTGGCCACAGCAAGTAGTACATTTTCC  
ATCTCAGCCCAGTGCATGGACAAACGTACCTCAAACCAAAGGTTCAATGAAGCTCTAT  
TTATCTTTACTATATGCTCTGGT

>1910

ATCTTAGAGTGGAGGCTGTGGCCACAGCAAGTAGTACATTTTCCATCTCAGCCCAGTG  
CATGGACAAACGTACCTCAAACCAAAGGTTCAATGAAGCTCTATTTATCTTTACTATATG

CTCTGGTATCTTCTCTTCCAT

>1911

TGTGGCCCACAGCAAGTAGTACATTTTCCATCTCAGCCCAGTGCATGGACAAACGTAC  
CTCAAACCAAAGGTTCAATGAAGCTCTATTTATCTTTACTATATGCTCTGGTATCTTCTCT  
TCCATTCTATCTTATTTTCATT

>1912

CAGTGCATGGACAAACGTACCTCAAACCAAAGGTTCAATGAAGCTCTATTTATCTTTAC  
TATATGCTCTGGTATCTTCTCTTCCATTCTATCTTATTTCAATTAAGAACGTTAATGAAGA  
CCCACTAATGGATTGCCACC

>1913

GAAGCTCTATTTATCTTTACTATATGCTCTGGTATCTTCTCTTCCATTCTATCTTATTTTCATT  
TAAGAACGTTAATGAAGACCCACTAATGGATTGCCACCCATGGTTCGAGGAGGTCCCC  
CAAACAGTGAGGCCTTAGC

>1914

CTTCTCTTCCATTCTATCTTATTTCAATTAAGAACGTTAATGAAGACCCACTAATGGATTG  
CCACCCATGGTTCGAGGAGGTCCCCCAAACAGTGAGGCCTTAGCCATAGGTATTCAATT  
CAAAAAGCATTACTGAGCA

>1915

ATTCTATCTTATTTCAATTAAGAACGTTAATGAAGACCCACTAATGGATTGCCACCCATG  
GTTTCGAGGAGGTCCCCCAAACAGTGAGGCCTTAGCCATAGGTATTCAATTCAAAAAGC  
ATTTACTGAGCATCACTGTGTA

>1916

TGAAGACCCACTAATGGATTGCCACCCATGGTTCGAGGAGGTCCCCCAAACAGTGAGG  
CCTTAGCCATAGGTATTCAATTCAAAAAGCATTACTGAGCATCACTGTGTACTAGGTG  
GTTGCTAAATGCTATGGGGGTAA

>1917

AGGAGGTCCCCCAAACAGTGAGGCCTTAGCCATAGGTATTCAATTCAAAAAGCATTTA  
CTGAGCATCACTGTGTACTAGGTGGTTGCTAAATGCTATGGGGGTAAATGCAGAGAAATT  
AATAAATCCCTGTAAGAGTTCAC

>1918

AAACAGTGAGGCCTTAGCCATAGGTATTCAATTCAAAAAGCATTACTGAGCATCACTG  
TGTAAGGTGGTTGCTAAATGCTATGGGGGTAAATGCAGAGAAATTAATAAATCCCTGT  
AAGAGTTCAGTGTAACAGAA

>1919

ATAGGTATTCAATTCAAAAAGCATTACTGAGCATCACTGTGTACTAGGTGGTTGCTAA  
ATGCTATGGGGGTAAATGCAGAGAAATTAATAAATCCCTGTAAGAGTTCAGTGTAACAA  
GAAATGACAGCCATATGTGTAT

>1920

CTGAGCATCACTGTGTACTAGGTGGTTGCTAAATGCTATGGGGGTAAATGCAGAGAAATT  
AATAAATCCCTGTAAGAGTTCAGTGTAACAGAAATGACAGCCATATGTGTATGACTT  
TGTGTGTGTGTATATATATA

>1921

ATGGGGGTAAATGCAGAGAAATTAATAAATCCCTGTAAGAGTTCAGTGTAACAGAAA  
TGACAGCCATATGTGTATGACTTTGTGTGTGTGTGTATATATATATATCAGACTGTATGATT

AAATATTATATAAGTGAGGT

>1922

GGGGGTAATGCAGAGAAATTAATAAATCCCTGTAAGAGTTCACCTGTAAACAGAAATG  
ACAGCCATATGTGTATGACTTTGTGTGTGTGTGTATATATATATATATCAGACTGTATGATTA  
AATATTATATAAGTGAGGTAT

>1923

CACTGTAAACAGAAATGACAGCCATATGTGTATGACTTTGTGTGTGTGTGTATATATAT  
ATATCAGACTGTATGATTAAATATTATATAAGTGAGGTATGGGGGAGCAGAGGAGAGGA  
ATTGAATTTTGAATTTTGATT

>1924

GCCATATGTGTATGACTTTGTGTGTGTGTGTATATATATATATCAGACTGTATGATTAAATA  
TTATATAAGTGAGGTATGGGGGAGCAGAGGAGAGGAATTGAATTTTGAATTTTGATTGA  
AGATTCAGGAGGGCTTCAT

>1925

ATGTGTATGACTTTGTGTGTGTGTGTATATATATATATCAGACTGTATGATTAAATATTATA  
TAAGTGAGGTATGGGGGAGCAGAGGAGAGGAATTGAATTTTGAATTTTGATTGAAGAT  
TCAGGAGGGCTTCATGGAGG

>1926

ATGGGGGAGCAGAGGAGAGGAATTGAATTTTGAATTTTGATTGAAGATTCAGGAGGGC  
TTCATGGAGGAGGTAGCATTGGCCAGGTTTTAGAGAATGGCTAGGCTTTGGACAAGT  
GGAGACAGGAACTGCCATTTGGAG

>1927

AGAGGAATTGAATTTTGAATTTTGATTGAAGATTCAGGAGGGCTTCATGGAGGAGGTA  
GCATTTGGCCAGGTTTTAGAGAATGGCTAGGCTTTGGACAAGTGGAGACAGGAACTGC  
CATTTGGAGGTAGGAGATGAGCTA

>1928

AGATTCAGGAGGGCTTCATGGAGGAGGTAGCATTGGCCAGGTTTTAGAGAATGGCTA  
GGCTTTGGACAAGTGGAGACAGGAACTGCCATTTGGAGGTAGGAGATGAGCTAATGT  
GTGGCAGTGTATGGGTGGGGGCAGG

>1929

GTAGCATTTGGCCAGGTTTTAGAGAATGGCTAGGCTTTGGACAAGTGGAGACAGGAAC  
TGCCATTTGGAGGTAGGAGATGAGCTAATGTGTGGCAGTGTATGGGTGGGGGCAGGTG  
CCTGTATACAAGGTAGTGTGCTGG

>1930

TTTAGAGAATGGCTAGGCTTTGGACAAGTGGAGACAGGAACTGCCATTTGGAGGTAGG  
AGATGAGCTAATGTGTGGCAGTGTATGGGTGGGGGCAGGTGCCTGTATACAAGGTAGT  
GTGCTGGAATGGGGCGATGGGCAT

>1931

TAGAGAATGGCTAGGCTTTGGACAAGTGGAGACAGGAACTGCCATTTGGAGGTAGGA  
GATGAGCTAATGTGTGGCAGTGTATGGGTGGGGGCAGGTGCCTGTATACAAGGTAGTG  
TGCTGGAATGGGGCGATGGGCATGG

>1932

GCTTTGGACAAGTGGAGACAGGAACTGCCATTTGGAGGTAGGAGATGAGCTAATGTGT  
GGCAGTGTATGGGTGGGGGCAGGTGCCTGTATACAAGGTAGTGTGCTGGAATGGGGCG

ATGGGCATGGGGTAGGATGGGAGA

>1933

TGCCATTTGGAGGTAGGAGATGAGCTAATGTGTGGCAGTGTATGGGTGGGGGCAGGTG  
CCTGTATACAAGGTAGTGTGCTGGAATGGGGCGATGGGCATGGGGTAGGATGGGAGAT  
CAAGCAGGGAAAGTGGATTGGGGC

>1934

TGGCAGTGTATGGGTGGGGGCAGGTGCCTGTATACAAGGTAGTGTGCTGGAATGGGGC  
GATGGGCATGGGGTAGGATGGGAGATCAAGCAGGGAAAGTGGATTGGGGCCAGGTCC  
TAGAATGATTTGAATACCAAGCTAG

>1935

CCTGTATACAAGGTAGTGTGCTGGAATGGGGCGATGGGCATGGGGTAGGATGGGAGAT  
CAAGCAGGGAAAGTGGATTGGGGCCAGGTCCTAGAATGATTTGAATACCAAGCTAGCT  
TTCTGGACATTTGTAAGGCGCACT

>1936

GTGTGCTGGAATGGGGCGATGGGCATGGGGTAGGATGGGAGATCAAGCAGGGAAAGT  
GGATTGGGGCCAGGTCCTAGAATGATTTGAATACCAAGCTAGCTTTCTGGACATTTGTA  
AGGCGCACTTGATAGGGGTTGGAT

>1937

CAAGCAGGGAAAGTGGATTGGGGCCAGGTCCTAGAATGATTTGAATACCAAGCTAGCT  
TTCTGGACATTTGTAAGGCGCACTTGATAGGGGTTGGATCATTGCGATATTATTGGAAG  
ACAAAAGTGGGGAGGGTGTGAGA

>1938

GGGCCAGGTCCTAGAATGATTTGAATACCAAGCTAGCTTTCTGGACATTTGTAAGGCGC  
ACTTGATAGGGGTTGGATCATTGCGATATTATTGGAAGACAAAAGTGGGGAGGGTGTG  
AGACCATGTGGCTGCTCAGAATG

>1939

GGACATTTGTAAGGCGCACTTGATAGGGGTTGGATCATTGCGATATTATTGGAAGACAA  
AACTGGGGAGGGTGTGAGACCATGTGGCTGCTCAGAATGCAGAGCCCCTCTGATGTCC  
TCAGCCTTCTACGTATTTAGTGA

>1940

GGCGCACTTGATAGGGGTTGGATCATTGCGATATTATTGGAAGACAAAAGTGGGGAGG  
GTGTGAGACCATGTGGCTGCTCAGAATGCAGAGCCCCTCTGATGTCCTCAGCCTTCTAC  
GTATTTAGTGATGGGGGTGGTGG

>1941

TATTATTGGAAGACAAAAGTGGGGAGGGTGTGAGACCATGTGGCTGCTCAGAATGCAG  
AGCCCCTCTGATGTCCTCAGCCTTCTACGTATTTAGTGATGGGGGTGGTGGTGGTAAAG  
AGCCTTGCAGACAGCCTGGCTTG

>1942

AACTGGGGAGGGTGTGAGACCATGTGGCTGCTCAGAATGCAGAGCCCCTCTGATGTCC  
TCAGCCTTCTACGTATTTAGTGATGGGGGTGGTGGTGGTAAAGAGCCTTGCAGACAGC  
CTGGCTTGGGTGCTTGCTTGAAGT

>1943

AGACCATGTGGCTGCTCAGAATGCAGAGCCCCTCTGATGTCCTCAGCCTTCTACGTATT  
TAGTGATGGGGGTGGTGGTGGTAAAGAGCCTTGCAGACAGCCTGGCTTGGGTGCTTGC

TTGAAGTTCTTACGCCCCACTAAC

>1944

CCATGTGGCTGCTCAGAATGCAGAGCCCCCTCTGATGTCCTCAGCCTTCTACGTATTTAG  
TGATGGGGGTGGTGGTGGTAAAGAGCCTTGCAGACAGCCTGGCTTGGGTGCTTGCTTG  
AAGTTCTTACGCCCCACTAACTCC

>1945

TGTGGCTGCTCAGAATGCAGAGCCCCCTCTGATGTCCTCAGCCTTCTACGTATTTAGTGA  
TGGGGGTGGTGGTGGTAAAGAGCCTTGCAGACAGCCTGGCTTGGGTGCTTGCTTGAA  
GTTCTTACGCCCCACTAACTCCTGC

>1946

TCCTCAGCCTTCTACGTATTTAGTGATGGGGGTGGTGGTGGTAAAGAGCCTTGCAGAC  
AGCCTGGCTTGGGTGCTTGCTTGAAGTTCTTACGCCCCACTAACTCCTGCCCTGCTCTGT  
GGAGCCTGCTGAATGGGGCATTAA

>1947

GAGCCTTGCAGACAGCCTGGCTTGGGTGCTTGCTTGAAGTTCTTACGCCCCACTAACTC  
CTGCCCTGCTCTGTGGAGCCTGCTGAATGGGGCATTAGGCTAGTCACACACCTGTCCTT  
TTTCACATTCATGCTGTACCCTT

>1948

TGCTTGAAGTTCTTACGCCCCACTAACTCCTGCCCTGCTCTGTGGAGCCTGCTGAATGGG  
GCATTAGGCTAGTCACACACCTGTCCTTTTTTCACATTCATGCTGTACCCTTTGCAAACAT  
TACGCAGCAGTGCAAACCTCAG

>1949

CTTACGCCCCACTAACTCCTGCCCTGCTCTGTGGAGCCTGCTGAATGGGGCATTAGGCTA  
GTCACACACCTGTCCTTTTTTCACATTCATGCTGTACCCTTTGCAAACATTACGCAGCAG  
TGCAAACCTCAGCCCTGGGCCTC

>1950

CCTGCTCTGTGGAGCCTGCTGAATGGGGCATTAGGCTAGTCACACACCTGTCCTTTTTTC  
ACATTCATGCTGTACCCTTTGCAAACATTACGCAGCAGTGCAAACCTCAGCCCTGGGCCT  
CAGAGGAGCCAGGCGTGGCCAG

>1951

GGCATTAGGCTAGTCACACACCTGTCCTTTTTTCACATTCATGCTGTACCCTTTGCAAACA  
TTACGCAGCAGTGCAAACCTCAGCCCTGGGCCTCAGAGGAGCCAGGCGTGGCCAGGAG  
AGTGGGATTTGGAACGGAAGTGC

>1952

TTCATGCTGTACCCTTTGCAAACATTACGCAGCAGTGCAAACCTCAGCCCTGGGCCTCA  
GAGGAGCCAGGCGTGGCCAGGAGAGTGGGATTTGGAACGGAAGTGCTTTTGTTTTTG  
GCATTCACTACTCCCCACCCCCAC

>1953

CCTTTGCAAACATTACGCAGCAGTGCAAACCTCAGCCCTGGGCCTCAGAGGAGCCAGG  
CGTGGCCAGGAGAGTGGGATTTGGAACGGAAGTGCTTTTGTTTTTGGCATTCACTACT  
CCCCACCCCCACTGGCACTTGGAT

>1954

AAACTCAGCCCTGGGCCTCAGAGGAGCCAGGCGTGGCCAGGAGAGTGGGATTTGGAA  
CGGAAGTGCTTTTGTTTTTGGCATTCACTACTCCCCACCCCCACTGGCACTTGGATTG



TCCTTCTTTTTCTCCTTGGTGTCT

>1955

TGGGATTGGAACGGAAGTGCTTTTGTGTTTGGCATTCACTACTCCCCACCCCCACTG  
GCACTTGGATTGTCCTTCTTTTTCTCCTTGGTGTCTCTCATCCTGTCCAGCCTTCAAGAC  
CTCCTCAAGTCAGGCTTCTCT

>1956

GCTTTTGTGTTTGGCATTCACTACTCCCCACCCCCACTGGCACTTGGATTGTCCTTCTT  
TTTCTCCTTGGTGTCTCTCATCCTGTCCAGCCTTCAAGACCTCCTCAAGTCAGGCTTCT  
CTGGGAAGCGCTGTCTGTCTG

>1957

TTTTGTGTTTGGCATTCACTACTCCCCACCCCCACTGGCACTTGGATTGTCCTTCTTTT  
TCTCCTTGGTGTCTCTCATCCTGTCCAGCCTTCAAGACCTCCTCAAGTCAGGCTTCTCT  
GGGAAGCGCTGTCTGTCTGTC

>1958

TGGCACTTGGATTGTCCTTCTTTTTCTCCTTGGTGTCTCTCATCCTGTCCAGCCTTCAAG  
ACCTCCTCAAGTCAGGCTTCTCTGGGAAGCGCTGTCTGTCTGTCTTGGTGCTTGCTGG  
CTTCCTCTTCTGTCTCCTGTGC

>1959

TTCTCCTTGGTGTCTCTCATCCTGTCCAGCCTTCAAGACCTCCTCAAGTCAGGCTTCTC  
TGGGAAGCGCTGTCTGTCTGTCTTGGTGCTTGCTGGCTTCCTCTTCTGTCTCCTGTGCC  
ATCTCCAGTTTGCACCATTTGA

>1960

CCTTGGTGTCTCTCATCCTGTCCAGCCTTCAAGACCTCCTCAAGTCAGGCTTCTCTGGG  
AAGCGCTGTCTGTCTGTCTTGGTGCTTGCTGGCTTCCTCTTCTGTCTCCTGTGCCATCTC  
CAGTTTGCACCATTTGAGTAT

>1961

GACCTCCTCAAGTCAGGCTTCTCTGGGAAGCGCTGTCTGTCTGTCTTGGTGCTTGCTG  
GCTTCCTCTTCTGTCTCCTGTGCCATCTCCAGTTTGCACCATTTGAGTATAAGCTCTGCT  
GCCTCATTTGAGTTTAAGTTTT

>1962

TCTCTGGGAAGCGCTGTCTGTCTGTCTTGGTGCTTGCTGGCTTCCTCTTCTGTCTCCTG  
TGCCATCTCCAGTTTGCACCATTTGAGTATAAGCTCTGCTGCCTCATTTGAGTTTAAGTT  
TTATCCCCCAGCCACAACCT

>1963

GTCTGTCTGTCTTGGTGCTTGCTGGCTTCCTCTTCTGTCTCCTGTGCCATCTCCAGTTTG  
CACCATTTGAGTATAAGCTCTGCTGCCTCATTTGAGTTTAAGTTTTATCCCCCAGCCAC  
AACCTAAGTTCCATGAGGAT

>1964

CTTCCTCTTCTGTCTCCTGTGCCATCTCCAGTTTGCACCATTTGAGTATAAGCTCTGCTG  
CCTCATTTGAGTTTAAGTTTTATCCCCCAGCCACAACCTAAGTTCCATGAGGATAGTG  
ATTGTGGTTTATCTTCTCTCC

>1965

TTGCACCATTTGAGTATAAGCTCTGCTGCCTCATTTGAGTTTAAGTTTTATCCCCCAGC  
CACAACTAAGTTCCATGAGGATAGTGATTGTGGTTTATCTTCTCTCCCTCAGCTGTCTG

CTGACACCATGCTGAATACA

>1966

TATAAGCTCTGCTGCCTCATTTGAGTTTAAAGTTTTATCCCCCAGCCACAACCTAAGTTC  
CATGAGGATAGTGATTGTGGTTTATCTTCTCTCCCTCAGCTGTCTGCTGACACCATGCTG  
AATACATAGTAGGTACTCAG

>1967

TTTTATCCCCCAGCCACAACCTAAGTTCCATGAGGATAGTGATTGTGGTTTATCTTCTC  
TCCCTCAGCTGTCTGCTGACACCATGCTGAATACATAGTAGGTACTCAGTAAATAATAG  
CTAATTGAGCATTACTATGG

>1968

TCCATGAGGATAGTGATTGTGGTTTATCTTCTCTCCCTCAGCTGTCTGCTGACACCATGC  
TGAATACATAGTAGGTACTCAGTAAATAATAGCTAATTGAGCATTACTATGGACAAAGC  
ACTTTACTTGCAATTAACACA

>1969

AGTGATTGTGGTTTATCTTCTCTCCCTCAGCTGTCTGCTGACACCATGCTGAATACATAG  
TAGGTACTCAGTAAATAATAGCTAATTGAGCATTACTATGGACAAAGCACTTTACTTGC  
ATTAACACATCCCATCCTCA

>1970

AGCTAATTGAGCATTACTATGGACAAAGCACTTTACTTGCAATTAACACATCCCATCCTC  
ACAACCACCTGTGAGGTGAATCCTATTAAAAGGAATACTTGGGTGCTTTCAGAGTTATT  
CTCTCCAGCTTTGGACTTCTT

>1971

ATTGAGCATTACTATGGACAAAGCACTTTACTTGCAATTAACACATCCCATCCTCACAAC  
CACCTGTGAGGTGAATCCTATTAAAAGGAATACTTGGGTGCTTTCAGAGTTATTCTCTC  
CAGCTTTGGACTTCTTGTTTC

>1972

TTTACTTGCAATTAACACATCCCATCCTCACAACCACCTGTGAGGTGAATCCTATTAAA  
GGAATACTTGGGTGCTTTCAGAGTTATTCTCTCCAGCTTTGGACTTCTTGTTTCATTTGC  
CCTGAGAGCTCCTCAACTCTG

>1973

TAACACATCCCATCCTCACAACCACCTGTGAGGTGAATCCTATTAAAAGGAATACTTGG  
GTGCTTTCAGAGTTATTCTCTCCAGCTTTGGACTTCTTGTTTCATTTGCCCTGAGAGCTC  
CTCAACTCTGTTGATGCTGTT

>1974

GTGAGGTGAATCCTATTAAAAGGAATACTTGGGTGCTTTCAGAGTTATTCTCTCCAGCT  
TTGGACTTCTTGTTTCATTTGCCCTGAGAGCTCCTCAACTCTGTTGATGCTGTTCTTTCA  
AAGGTTGCTTGTGACCTCTTA

>1975

GGTGCTTTCAGAGTTATTCTCTCCAGCTTTGGACTTCTTGTTTCATTTGCCCTGAGAGCT  
CCTCAACTCTGTTGATGCTGTTCTTTCAAAGGTTGCTTGTGACCTCTTAGTTCTCAAGA  
GCACTGTATTAGGTTGGTGCA

>1976

TCCAGCTTTGGACTTCTTGTTTCATTTGCCCTGAGAGCTCCTCAACTCTGTTGATGCTG  
TTCTTTCAAAGGTTGCTTGTGACCTCTTAGTTCTCAAGAGCACTGTATTAGGTTGGTG

AAAAGTAATTGCTATTTTAGAC

>1977

TTGGACTTCTTGTTTCATTTGCCCTGAGAGCTCCTCAACTCTGTTGATGCTGTTCTTTCA  
AAGGTTGCTTGTGACCTCTTAGTTCTCAAGAGCACTGTATTAGGTTGGTGCAAAAGTAA  
TTGCTATTTTAGACATTACTT

>1978

GTTTCATTTGCCCTGAGAGCTCCTCAACTCTGTTGATGCTGTTCTTTCAAAGGTTGCTT  
GTGACCTCTTAGTTCTCAAGAGCACTGTATTAGGTTGGTGCAAAAGTAATTGCTATTTT  
AGACATTACTTTCAATGGCAAA

>1979

CTCAACTCTGTTGATGCTGTTCTTTCAAAGGTTGCTTGTGACCTCTTAGTTCTCAAGAG  
CACTGTATTAGGTTGGTGCAAAAGTAATTGCTATTTTAGACATTACTTTCAATGGCAAAA  
ACTGCAATTACTTTTGCGCCA

>1980

TTTAGACATTACTTTCAATGGCAAAAAGTCAATTACTTTTGCGCCAACTAATACTTTC  
CCAGACTCCAGTATTGGCTCCATTGACCCCTCCTGTTCTTGCCAACTTCTCCCCCTCCT  
CCTCTGGTATTTCTGGA

>1981

AAAAGTCAATTACTTTTGCGCCAACTAATACTTTCCAGACTCCAGTATTGGCTCCATT  
GACCCCTCCTGTTCTTGCCAACTTCTCCCCCTCCTCCTCTGGTATTTCTGGA

>1982

CTTTCCAGACTCCAGTATTGGCTCCATTGACCCCTCCTGTTCTTGCCAACTTCTCCCC  
TCTCCTCTGGTATTTCTGGA

>1983

ATTGACCCCTCCTGTTCTTGCCAACTTCTCCCCCTCCTCCTCTGGTATTTCTGGA  
CCTCCCTAGGGTCAGTGCCATGTGGTGCCCTGGA

>1984

TTCTTGCCAACTTCTCCCCCTCCTCCTCTGGTATTTCTGGA

>1985

TCCTCTGGTATTTCTGGA

>1986

CTCTGGTATTTCTGGA

>1987

GGGTCAGTGCCATGTGGTGCCCTGGA

ATCTGCAAAATGCTGGTAGTTT

>1988

TCTGTGTTTGAATCCTGACATTGCCACTTTCTAAGTGGCAAACACTTTGGCCACCTCCC  
CCTCTTCCTGAGTCTGTTTCATCATCTGCAAAATGCTGGTAGTTTCTCTTCTCACAGGA  
AAGATGGTGGTTGTTTCATCGAT

>1989

TGTTTGAATCCTGACATTGCCACTTTCTAAGTGGCAAACACTTTGGCCACCTCCCCCTC  
TTCCTGAGTCTGTTTCATCATCTGCAAAATGCTGGTAGTTTCTCTTCTCACAGGAAAGA  
TGGTGGTTGTTTCATCGATGTCT

>1990

TTTCTAAGTGGCAAACACTTTGGCCACCTCCCCCTCTTCCTGAGTCTGTTTCATCATCT  
GCAAAATGCTGGTAGTTTCTCTTCTCACAGGAAAGATGGTGGTTGTTTCATCGATGTCTG  
TTGAAACCGTGACCCTCTCTGC

>1991

CTCCCCCTCTTCCTGAGTCTGTTTCATCATCTGCAAAATGCTGGTAGTTTCTCTTCTCAC  
AGGAAAGATGGTGGTTGTTTCATCGATGTCTGTTGAAACCGTGACCCTCTCTGCTGAAT  
GTAGAAGAAGATGACCTTACCA

>1992

CCCCTCTTCCTGAGTCTGTTTCATCATCTGCAAAATGCTGGTAGTTTCTCTTCTCACAGG  
AAAGATGGTGGTTGTTTCATCGATGTCTGTTGAAACCGTGACCCTCTCTGCTGAATGTAG  
AAGAAGATGACCTTACCAGTT

>1993

GTTTCATCATCTGCAAAATGCTGGTAGTTTCTCTTCTCACAGGAAAGATGGTGGTTGTT  
CATCGATGTCTGTTGAAACCGTGACCCTCTCTGCTGAATGTAGAAGAAGATGACCTTAC  
CAGTTCTCCTGTCTCTCCAGTG

>1994

TTCTCTTCTCACAGGAAAGATGGTGGTTGTTTCATCGATGTCTGTTGAAACCGTGACCCT  
CTCTGCTGAATGTAGAAGAAGATGACCTTACCAGTTCTCCTGTCTCTCCAGTGTCTTTC  
TTGACAATCTTGTGGTTTCCAC

>1995

GTGGTTGTTTCATCGATGTCTGTTGAAACCGTGACCCTCTCTGCTGAATGTAGAAGAAGA  
TGACCTTACCAGTTCTCCTGTCTCTCCAGTGTCTTTCTTGACAATCTTGTGGTTTCCACA  
AGCAACCCTCTGTGGGTGATT

>1996

TCATCGATGTCTGTTGAAACCGTGACCCTCTCTGCTGAATGTAGAAGAAGATGACCTTA  
CCAGTTCTCCTGTCTCTCCAGTGTCTTTCTTGACAATCTTGTGGTTTCCACAAGCAACC  
CTCTGTGGGTGATTCCAGATC

>1997

CTCTGCTGAATGTAGAAGAAGATGACCTTACCAGTTCTCCTGTCTCTCCAGTGTCTTTC  
TTGACAATCTTGTGGTTTCCACAAGCAACCCTCTGTGGGTGATTCCAGATCTCTACCT  
CTAGTTGTTTTTCGTTTTTTGT

>1998

TGCTGAATGTAGAAGAAGATGACCTTACCAGTTCTCCTGTCTCTCCAGTGTCTTTCTTG  
ACAATCTTGTGGTTTCCACAAGCAACCCTCTGTGGGTGATTCCAGATCTCTACCTCTA

GTTGTTTTTCGTTTTTTGTCTT

>1999

GACCTTACCAGTTCTCCTGTCTCTCCAGTGTCTTTCTTGACAATCTTGTGGTTTCCACA  
AGCAACCCTCTGTGGGTGATTTCCAGATCTCTACCTCTAGTTGTTTTTCGTTTTTTGTCT  
TTTCTTGTGTTTCACACATTC

>2000

TGTCTTTCTTGACAATCTTGTGGTTTCCACAAGCAACCCTCTGTGGGTGATTTCCAGAT  
CTCTACCTCTAGTTGTTTTTCGTTTTTTGTCTTTTCTTGTGTTTCACACATTCTTTTCCAG  
TAGCCTCACGGGCACACCAG

>2001

GACAATCTTGTGGTTTCCACAAGCAACCCTCTGTGGGTGATTTCCAGATCTCTACCTCT  
AGTTGTTTTTCGTTTTTTGTCTTTTCTTGTGTTTCACACATTCTTTTCCAGTAGCCTCAC  
GGGCACACCAGTCCTGCAAGG

>2002

TTGTGGTTTCCACAAGCAACCCTCTGTGGGTGATTTCCAGATCTCTACCTCTAGTTGTT  
TTTCGTTTTTTGTCTTTTCTTGTGTTTCACACATTCTTTTCCAGTAGCCTCACGGGCACA  
CCAGTCCTGCAAGGATCTAGA

>2003

CACAAGCAACCCTCTGTGGGTGATTTCCAGATCTCTACCTCTAGTTGTTTTTCGTTTTTT  
GTCTTTTCTTGTGTTTCACACATTCTTTTCCAGTAGCCTCACGGGCACACCAGTCCTGC  
AAGGATCTAGAATGTGATGGT

>2004

ATTTCAGATCTCTACCTCTAGTTGTTTTTCGTTTTTTGTCTTTTCTTGTGTTTCACACAT  
TCTTTTCCAGTAGCCTCACGGGCACACCAGTCCTGCAAGGATCTAGAATGTGATGGTTT  
GAGCTAGTTCAACACCTTCC

>2005

AGTTGTTTTTCGTTTTTTGTCTTTTCTTGTGTTTCACACATTCTTTTCCAGTAGCCTCAC  
GGGCACACCAGTCCTGCAAGGATCTAGAATGTGATGGTTTGAGCTAGTTCAACACCTT  
CCTCTCGAATCGTCTCCTGTGT

>2006

CTTTTCTTGTGTTTCACACATTCTTTTCCAGTAGCCTCACGGGCACACCAGTCCTGCAA  
GGATCTAGAATGTGATGGTTTGAGCTAGTTCAACACCTTCCTCTCGAATCGTCTCCTGT  
GTCCTCATGTTTTGTGGTCTCT

>2007

TTGTGTTTCACACATTCTTTTCCAGTAGCCTCACGGGCACACCAGTCCTGCAAGGATCT  
AGAATGTGATGGTTTGAGCTAGTTCAACACCTTCCTCTCGAATCGTCTCCTGTGTCCTC  
ATGTTTTGTGGTCTCTGCCCTC

>2008

CGGGCACACCAGTCCTGCAAGGATCTAGAATGTGATGGTTTGAGCTAGTTCAACACCT  
TCCTCTCGAATCGTCTCCTGTGTCCTCATGTTTTGTGGTCTCTGCCCTCTTCCCAGGCAC  
CCAACGCAGACTTTGGCATCA

>2009

ACCAGTCCTGCAAGGATCTAGAATGTGATGGTTTGAGCTAGTTCAACACCTTCCTCTCG  
AATCGTCTCCTGTGTCCTCATGTTTTGTGGTCTCTGCCCTCTTCCCAGGCACCCAACCTG

CAGACTTTGGCATCATCTGTGG

>2010

CAGTCCTGCAAGGATCTAGAATGTGATGGTTTGAGCTAGTTCAACACCTTCCTCTCGAA  
TCGTCTCCTGTGTCTCATGTTTTGTGGTCTCTGCCCTCTTCCCAGGCACCCAAGTCA  
GACTTTGGCATCATCTGTGGCT

>2011

ATCTAGAATGTGATGGTTTGAGCTAGTTCAACACCTTCCTCTCGAATCGTCTCCTGTGT  
CCTCATGTTTTGTGGTCTCTGCCCTCTTCCCAGGCACCCAAGTGCAGACTTTGGCATCA  
TCTGTGGCTCCTGTCTTCCCTT

>2012

TCCTGTGTCTCATGTTTTGTGGTCTCTGCCCTCTTCCCAGGCACCCAAGTGCAGACTT  
TGGCATCATCTGTGGCTCCTGTCTTCCCTTTGCCTTCCATATCCACCATTTGCCTCTCCA  
GCCTACTTAACCAGATGGCTG

>2013

CTCATGTTTTGTGGTCTCTGCCCTCTTCCCAGGCACCCAAGTGCAGACTTTGGCATCAT  
CTGTGGCTCCTGTCTTCCCTTTGCCTTCCATATCCACCATTTGCCTCTCCAGCCTACTTA  
ACCAGATGGCTGTCCTGATT

>2014

TGTGGCTCCTGTCTTCCCTTTGCCTTCCATATCCACCATTTGCCTCTCCAGCCTACTTAA  
CCAGATGGCTGTCCTGATTTCCTCACCAGCCTTCCTGCAGTGCACCCCTGCAAGGCTCA  
TCACCCCACTTCCCTGAGCAG

>2015

TATCCACCATTTGCCTCTCCAGCCTACTTAACCAGATGGCTGTCCTGATTTCCTCACCAG  
CCTTCCTGCAGTGCACCCCTGCAAGGCTCATCACCCCACTTCCCTGAGCAGAGTAGGG  
CTCTGATGGGGTTGCTCTCCTG

>2016

TCCTGATTTCCCTCACCAGCCTTCCTGCAGTGCACCCCTGCAAGGCTCATCACCCCACTT  
CCCTGAGCAGAGTAGGGCTCTGATGGGGTTGCTCTCCTGCTCTGAACCCTGCAGTGGC  
TCACTATGGCCTATTCTAGAGAA

>2017

AGCCTTCCTGCAGTGCACCCCTGCAAGGCTCATCACCCCACTTCCCTGAGCAGAGTAG  
GGCTCTGATGGGGTTGCTCTCCTGCTCTGAACCCTGCAGTGGCTCACTATGGCCTATT  
TAGAGAAGAAACGAGAGAATTCT

>2018

GGCTCATCACCCCACTTCCCTGAGCAGAGTAGGGCTCTGATGGGGTTGCTCTCCTGCTC  
TGAACCCTGCAGTGGCTCACTATGGCCTATTCTAGAGAAGAAACGAGAGAATTCTTAG  
CGTGGCATTCAAAGCCATCCGGG

>2019

CTCTCCTGCTCTGAACCCTGCAGTGGCTCACTATGGCCTATTCTAGAGAAGAAACGAG  
AGAATTCTTAGCGTGGCATTCAAAGCCATCCGGGATCCTAGATTCCAGCTACATTTTCA  
CTCTTCATCCCTTTCTCTGCATA

>2020

AGCCATCCGGGATCCTAGATTCCAGCTACATTTTCACTCTTCATCCCTTTCTCTGCATATT  
TCTTAGAATGTACACCCCTGAAGGCAGGGACCATCTTTTTTACATCTGTGTTACAACCT

TTTAGTCCACTCTCTAGCAT

>2021

CTTCATCCCTTTCTCTGCATATTTCTTAGAATGTACACCCCTGAAGGCAGGGACCATCTT  
TTTCACATCTGTGTTACAACCTTTTAGTCCACTCTCTAGCATATGGCAACTCAGCAGATG  
CTGCTGTTGAGTAAACTCTT

>2022

TCATCCCTTTCTCTGCATATTTCTTAGAATGTACACCCCTGAAGGCAGGGACCATCTTTT  
TCACATCTGTGTTACAACCTTTTAGTCCACTCTCTAGCATATGGCAACTCAGCAGATGCT  
GCTGTTGAGTAAACTCTTAT

>2023

GCATATTTCTTAGAATGTACACCCCTGAAGGCAGGGACCATCTTTTTTCACATCTGTGTTA  
CAACCTTTTAGTCCACTCTCTAGCATATGGCAACTCAGCAGATGCTGCTGTTGAGTAAA  
CTCTTATGCTTCCCTTCCCAT

>2024

ATCTTTTTTCACATCTGTGTTACAACCTTTTAGTCCACTCTCTAGCATATGGCAACTCAGC  
AGATGCTGCTGTTGAGTAAACTCTTATGCTTCCCTTCCCATGCCATATCCTTCTCTGGTC  
ATCGCAACAGGGCCAAATCT

>2025

TTTCACATCTGTGTTACAACCTTTTAGTCCACTCTCTAGCATATGGCAACTCAGCAGATG  
CTGCTGTTGAGTAAACTCTTATGCTTCCCTTCCCATGCCATATCCTTCTCTGGTCATCGC  
AACAGGGCCAAATCTCTCAT

>2026

ATGGCAACTCAGCAGATGCTGCTGTTGAGTAAACTCTTATGCTTCCCTTCCCATGCCATA  
TCCTTCTCTGGTCATCGCAACAGGGCCAAATCTCTCATGCTTCAGTGAAATGCCCTCT  
CCTTGCAGCATCCTTTCCTGG

>2027

TCTTATGCTTCCCTTCCCATGCCATATCCTTCTCTGGTCATCGCAACAGGGCCAAATCTC  
TCATGCTTCAGTGAAATGCCCTCTCCTTGCAGCATCCTTTCCTGGGGCATTCTTCCTCC  
TTGCATCCAGTTGGAAATAA

>2028

TTATGCTTCCCTTCCCATGCCATATCCTTCTCTGGTCATCGCAACAGGGCCAAATCTCTC  
ATGCTTCAGTGAAATGCCCTCTCCTTGCAGCATCCTTTCCTGGGGCATTCTTCCTCCTT  
GCATCCAGTTGGAAATAATA

>2029

CTCATGCTTCAGTGAAATGCCCTCTCCTTGCAGCATCCTTTCCTGGGGCATTCTTCCTC  
CTTGCATCCAGTTGGAAATAATATGTCCCTCCATTGGAGCTCCCACACCAGAAGAGGTA  
TAGATAAAGCCAGATACTTCT

>2030

TAAATGCCCTCTCCTTGCAGCATCCTTTCCTGGGGCATTCTTCCTCCTTGCATCCAGTTG  
GAAATAATATGTCCCTCCATTGGAGCTCCCACACCAGAAGAGGTATAGATAAAGCCAGA  
TACTTCTTTTTTTTTTTTTTTT

>2031

GGGCATTCTTCCTCCTTGCATCCAGTTGGAAATAATATGTCCCTCCATTGGAGCTCCCAC  
ACCAGAAGAGGTATAGATAAAGCCAGATACTTCTTTTTTTTTTTTTTTTTTTTGATACAGA

GTCTCACTCTGTTGCCCAGG

>2032

GAGCTCCCACACCAGAAGAGGTATAGATAAAGCCAGATACTTCTTTTTTTTTTTTTTTTTT  
TTGATACAGAGTCTCACTCTGTTGCCCAGGCTGGAGTGTAGTGGCATGAACTTGGCTC  
ACTGCAGCCTCTGCCTCTTGGG

>2033

ACCAGAAGAGGTATAGATAAAGCCAGATACTTCTTTTTTTTTTTTTTTTTTTTGATACAGA  
GTCTCACTCTGTTGCCCAGGCTGGAGTGTAGTGGCATGAACTTGGCTCACTGCAGCCT  
CTGCCTCTTGGGTTCAAGTGAT

>2034

GATAAAGCCAGATACTTCTTTTTTTTTTTTTTTTTTTTGATACAGAGTCTCACTCTGTTGCC  
CAGGCTGGAGTGTAGTGGCATGAACTTGGCTCACTGCAGCCTCTGCCTCTTGGGTTCA  
AGTGATTCTTGCGTCTCAGCC

>2035

AGCCAGATACTTCTTTTTTTTTTTTTTTTTTTTGATACAGAGTCTCACTCTGTTGCCCAGG  
CTGGAGTGTAGTGGCATGAACTTGGCTCACTGCAGCCTCTGCCTCTTGGGTTCAAGTG  
ATTCTTGCGTCTCAGCCTCCCG

>2036

AGTCTCACTCTGTTGCCCAGGCTGGAGTGTAGTGGCATGAACTTGGCTCACTGCAGCC  
TCTGCCTCTTGGGTTCAAGTGATTCTTGCGTCTCAGCCTCCCGAGTAGCTGAGATTACA  
GACATGCGCTACCATGCCTGGCT

>2037

ACTCTGTTGCCCAGGCTGGAGTGTAGTGGCATGAACTTGGCTCACTGCAGCCTCTGCC  
TCTTGGGTTCAAGTGATTCTTGCGTCTCAGCCTCCCGAGTAGCTGAGATTACAGACATG  
CGCTACCATGCCTGGCTAATTTT

>2038

CAGGCTGGAGTGTAGTGGCATGAACTTGGCTCACTGCAGCCTCTGCCTCTTGGGTTCA  
AGTGATTCTTGCGTCTCAGCCTCCCGAGTAGCTGAGATTACAGACATGCGCTACCATGC  
CTGGCTAATTTTGTATTTTAG

>2039

TGGCATGAACTTGGCTCACTGCAGCCTCTGCCTCTTGGGTTCAAGTGATTCTTGCGTCT  
CAGCCTCCCGAGTAGCTGAGATTACAGACATGCGCTACCATGCCTGGCTAATTTTGT  
TTTTTAGTAGAGATGCGGTTTC

>2040

TGATTCTTGCGTCTCAGCCTCCCGAGTAGCTGAGATTACAGACATGCGCTACCATGCCT  
GGCTAATTTTGTATTTTAGTAGAGATGCGGTTTCACCATGCTGGCCAGGCTGGTCCCC  
AACTCCTCGCCTCAAGTGATC

>2041

CGTCTCAGCCTCCCGAGTAGCTGAGATTACAGACATGCGCTACCATGCCTGGCTAATTT  
TTGTATTTTAGTAGAGATGCGGTTTCACCATGCTGGCCAGGCTGGTCCCCAACTCCTC  
GCCTCAAGTGATCTTCCTGCCT

>2042

ATGCGCTACCATGCCTGGCTAATTTTGTATTTTAGTAGAGATGCGGTTTCACCATGCT  
GGCCAGGCTGGTCCCCAACTCCTCGCCTCAAGTGATCTTCCTGCCTTAGCCTCCCAGA



GTGCTAGGATTACAGGTGTGAG

>2043

ATTTTGTATTTTAGTAGAGATGCGGTTTCACCATGCTGGCCAGGCTGGTCCCCAACTC  
CTCGCCTCAAGTGATCTTCCTGCCTTAGCCTCCCAGAGTGCTAGGATTACAGGTGTGAG  
TCACTGTGCCCCGGCCTGGATC

>2044

TTTCACCATGCTGGCCAGGCTGGTCCCCAACTCCTCGCCTCAAGTGATCTTCCTGCCTT  
AGCCTCCCAGAGTGCTAGGATTACAGGTGTGAGTCACTGTGCCCCGGCCTGGATCTTTTA  
TTGTTTGTATTTCTGTTCATTT

>2045

CAGGCTGGTCCCCAACTCCTCGCCTCAAGTGATCTTCCTGCCTTAGCCTCCCAGAGTGC  
TAGGATTACAGGTGTGAGTCACTGTGCCCCGGCCTGGATCTTTTATTGTTTGTATTTCTGT  
TCATTTCTTCCCTAAGAAACC

>2046

GGCTGGTCCCCAACTCCTCGCCTCAAGTGATCTTCCTGCCTTAGCCTCCCAGAGTGCTA  
GGATTACAGGTGTGAGTCACTGTGCCCCGGCCTGGATCTTTTATTGTTTGTATTTCTGTTC  
ATTTCTTCCCTAAGAAACCCC

>2047

CAACTCCTCGCCTCAAGTGATCTTCCTGCCTTAGCCTCCCAGAGTGCTAGGATTACAGG  
TGTGAGTCACTGTGCCCCGGCCTGGATCTTTTATTGTTTGTATTTCTGTTCATTTCTTCCCT  
AAGAAACCCACGTTTTTGT

>2048

TCCTGCCTTAGCCTCCCAGAGTGCTAGGATTACAGGTGTGAGTCACTGTGCCCCGGCCT  
GGATCTTTTATTGTTTGTATTTCTGTTCATTTCTTCCCTAAGAAACCCACGTTTTTGTGG  
GCAGGACCTGGAATCCTATTC

>2049

GAGTCACTGTGCCCCGGCCTGGATCTTTTATTGTTTGTATTTCTGTTCATTTCTTCCCTAA  
GAAACCCACGTTTTTGTGGGCAGGACCTGGAATCCTATTCAGTTATACAGCCCCGCTT  
CGTCCACTGCTCCCCTTCAGA

>2050

CTGTGCCCCGGCCTGGATCTTTTATTGTTTGTATTTCTGTTCATTTCTTCCCTAAGAAACC  
CCACGTTTTTGTGGGCAGGACCTGGAATCCTATTCAGTTATACAGCCCCGCTTCGTCCA  
CTGCTCCCCCTTCAGAGTCTAG

>2051

TTTGTATTTCTGTTCATTTCTTCCCTAAGAAACCCACGTTTTTGTGGGCAGGACCTGG  
AATCCTATTCAGTTATACAGCCCCGCTTCGTCCACTGCTCCCCTTCAGAGTCTAGTGCCC  
TGGACATCATAGGTATTCAGT

>2052

TCTTCCCTAAGAAACCCACGTTTTTGTGGGCAGGACCTGGAATCCTATTCAGTTATAC  
AGCCCCGCTTCGTCCACTGCTCCCCTTCAGAGTCTAGTGCCCTGGACATCATAGGTATT  
CAGTACCTCTTGCTGGCTTAGG

>2053

GTTTTTGTGGGCAGGACCTGGAATCCTATTCAGTTATACAGCCCCGCTTCGTCCACTGC  
TCCCCTTCAGAGTCTAGTGCCCTGGACATCATAGGTATTCAGTACCTCTTGCTGGCTTAG

GAACAGGAGGATGCCTGATGG

>2054

TCCTATTTCAGTTATACAGCCCCGCTTCGTCCACTGCTCCCCCTCAGAGTCTAGTGCCCTG  
GACATCATAGGTATTCAGTACCTCTTGCTGGCTTAGGAACAGGAGGATGCCTGATGGCC  
AGGGTGTTCCCTCTGAAGCAGT

>2055

GTGCCCTGGACATCATAGGTATTCAGTACCTCTTGCTGGCTTAGGAACAGGAGGATGCC  
TGATGGCCAGGGTGTTCCCTCTGAAGCAGTGGTGGCTGAGCTTTTTGAATATCTGCATTG  
TGCTAAGGGTTAACTACCCAGG

>2056

GCCCTGGACATCATAGGTATTCAGTACCTCTTGCTGGCTTAGGAACAGGAGGATGCCTG  
ATGGCCAGGGTGTTCCCTCTGAAGCAGTGGTGGCTGAGCTTTTTGAATATCTGCATTGTG  
CTAAGGGTTAACTACCCAGGCA

>2057

AGGTATTCAGTACCTCTTGCTGGCTTAGGAACAGGAGGATGCCTGATGGCCAGGGTGT  
TCCTCTGAAGCAGTGGTGGCTGAGCTTTTTGAATATCTGCATTGTGCTAAGGGTTAACT  
ACCCAGGCAGTACTGGTGGGGAA

>2058

TATTCAGTACCTCTTGCTGGCTTAGGAACAGGAGGATGCCTGATGGCCAGGGTGTTCCCT  
CTGAAGCAGTGGTGGCTGAGCTTTTTGAATATCTGCATTGTGCTAAGGGTTAACTACCC  
AGGCAGTACTGGTGGGGAAGGG

>2059

CAGGAGGATGCCTGATGGCCAGGGTGTTCCCTCTGAAGCAGTGGTGGCTGAGCTTTTTG  
AATATCTGCATTGTGCTAAGGGTTAACTACCCAGGCAGTACTGGTGGGGAAGGGCCCC  
AGAAGCAGGCCCCAGACTCAGGTAT

>2060

GCCTGATGGCCAGGGTGTTCCCTCTGAAGCAGTGGTGGCTGAGCTTTTTGAATATCTGCA  
TTGTGCTAAGGGTTAACTACCCAGGCAGTACTGGTGGGGAAGGGCCCCAGAAGCAGG  
CCCAGACTCAGGTATTGTTAAAGC

>2061

CTGAAGCAGTGGTGGCTGAGCTTTTTGAATATCTGCATTGTGCTAAGGGTTAACTACCC  
AGGCAGTACTGGTGGGGAAGGGCCCCAGAAGCAGGCCCCAGACTCAGGTATTGTTAAA  
GCAGAGTCATCTTTGCTCTGAAGT

>2062

CATTGTGCTAAGGGTTAACTACCCAGGCAGTACTGGTGGGGAAGGGCCCCAGAAGCA  
GGCCCAGACTCAGGTATTGTTAAAGCAGAGTCATCTTTGCTCTGAAGTTTTTTCTTTTAT  
CTTTTCTTTTCTTTTAAATTGG

>2063

TGCTAAGGGTTAACTACCCAGGCAGTACTGGTGGGGAAGGGCCCCAGAAGCAGGCC  
AGACTCAGGTATTGTTAAAGCAGAGTCATCTTTGCTCTGAAGTTTTTTCTTTTATCTTT  
CTTTTCTTTTAAATTGGGGGAA

>2064

TGGTGGGGAAGGGCCCCAGAAGCAGGCCCCAGACTCAGGTATTGTTAAAGCAGAGTCA  
TCTTTGCTCTGAAGTTTTTTCTTTTATCTTTTCTTTTCTTTTAAATTGGGGGAAACCTTG

TCCTAATTGGCATCTTTATTGT

>2065

AGCAGAGTCATCTTTGCTCTGAAGTTTTTCTTTTATCTTTTCTTTTCTTTTAAATTGGG  
GGAAACCTTGTCTAATTGGCATCTTTATTGTGGCAGGAATAGGCCAGGCAGGGCTGG  
GGGAGTGTGAAGTCTGTGAAG

>2066

AAGTTTTTCTTTTATCTTTTCTTTTCTTTTAAATTGGGGGAAACCTTGTCTAATTGGC  
ATCTTTATTGTGGCAGGAATAGGCCAGGCAGGGCTGGGGGAGTGTGAAGTCTGTGAAG  
GGAGGTGGCCTGGGGGCCCCC

>2067

TAATTGGGGGAAACCTTGTCTAATTGGCATCTTTATTGTGGCAGGAATAGGCCAGGCA  
GGGCTGGGGGAGTGTGAAGTCTGTGAAGGGAGGTGGCCTGGGGGCCCCCCCCACACAA  
TGCCTGATTGTGCAGGCATAGGTA

>2068

AACCTTGTCTAATTGGCATCTTTATTGTGGCAGGAATAGGCCAGGCAGGGCTGGGGG  
AGTGTGAAGTCTGTGAAGGGAGGTGGCCTGGGGGCCCCCCCCACACAATGCCTGATTG  
TGCAGGCATAGGTATGAACACATTG

>2069

TAATTGGCATCTTTATTGTGGCAGGAATAGGCCAGGCAGGGCTGGGGGAGTGTGAAGT  
CTGTGAAGGGAGGTGGCCTGGGGGCCCCCCCCACACAATGCCTGATTGTGCAGGCATAG  
GTATGAACACATTGCAGCCTGTGT

>2070

GGCAGGGCTGGGGGAGTGTGAAGTCTGTGAAGGGAGGTGGCCTGGGGGCCCCCCCCA  
CACAATGCCTGATTGTGCAGGCATAGGTATGAACACATTGCAGCCTGTGTGCACCCAC  
AGGGTGACCACGAGCAAGGCCTGGGG

>2071

GGAGGTGGCCTGGGGGCCCCCCCCACACAATGCCTGATTGTGCAGGCATAGGTATGAAC  
ACATTGCAGCCTGTGTGCACCCACAGGGTGACCACGAGCAAGGCCTGGGGACGAGGA  
CTACGAGGCCTGCAGCTGGGTCCTC

>2072

AGGTGGCCTGGGGGCCCCCCCCACACAATGCCTGATTGTGCAGGCATAGGTATGAACAC  
ATTGCAGCCTGTGTGCACCCACAGGGTGACCACGAGCAAGGCCTGGGGACGAGGACT  
ACGAGGCCTGCAGCTGGGTCTCTT

>2073

CAGCCTGTGTGCACCCACAGGGTGACCACGAGCAAGGCCTGGGGACGAGGACTACGA  
GGCCTGCAGCTGGGTCTCTTTTCTCCCTCCTACCCCCACCCAGTACCCACGTGATTG  
GGCCACATCCCAGTAACAAGCAGT

>2074

GCAAGGCCTGGGGACGAGGACTACGAGGCCTGCAGCTGGGTCTCTTTTCTCCCTCCT  
CACCCCCACCCAGTACCCACGTGATTGGGCCACATCCCAGTAACAAGCAGTCCTTGTG  
GAAGAGCCTTCATGAAGACCTTTG

>2075

TGGGGACGAGGACTACGAGGCCTGCAGCTGGGTCTCTTTTCTCCCTCCTACCCCCA  
CCCAGTACCCACGTGATTGGGCCACATCCCAGTAACAAGCAGTCCTTGTGGAAGAGCC

TTCATGAAGACCTTTGCTGGGAGT

>2076

GCCTGCAGCTGGGTCTCTTTTCTCCCTCCTCACCCCCACCCAGTACCCACGTGATTGG  
GCCACATCCCAGTAACAAGCAGTCCTTGTGGAAGAGCCTTCATGAAGACCTTTGCTGG  
GAGTGGCGGGCAGGGATCTGCGG

>2077

GGGTCTCTTTTCTCCCTCCTCACCCCCACCCAGTACCCACGTGATTGGGCCACATCCC  
AGTAACAAGCAGTCCTTGTGGAAGAGCCTTCATGAAGACCTTTGCTGGGAGTGGCGG  
GCAGGGATCTGCGGGGAGCGTTGC

>2078

ACGTGATTGGGCCACATCCCAGTAACAAGCAGTCCTTGTGGAAGAGCCTTCATGAAGA  
CCTTTGCTGGGAGTGGCGGGCAGGGATCTGCGGGGAGCGTTGCTGGTTCAAGCTGGG  
GCTTTCCTATGGATGATGTCCTGTG

>2079

AAGCAGTCCTTGTGGAAGAGCCTTCATGAAGACCTTTGCTGGGAGTGGCGGGCAGGG  
ATCTGCGGGGAGCGTTGCTGGTTCAAGCTGGGGCTTTCCTATGGATGATGTCCTGTGAA  
GGGTAGATCCTGGAGGGACAGACA

>2080

TGCTGGGAGTGGCGGGCAGGGATCTGCGGGGAGCGTTGCTGGTTCAAGCTGGGGCTT  
TCCTATGGATGATGTCCTGTGAAGGGTAGATCCTGGAGGGACAGACAGGTGTCTGATC  
TTTGGCAGGCAGGGATGTCTCATT

>2081

GGAGTGGCGGGCAGGGATCTGCGGGGAGCGTTGCTGGTTCAAGCTGGGGCTTTCCTAT  
GGATGATGTCCTGTGAAGGGTAGATCCTGGAGGGACAGACAGGTGTCTGATCTTTGGC  
AGGCAGGGATGTCTCATTGTACA

>2082

TTGCTGGTTCAAGCTGGGGCTTTCCTATGGATGATGTCCTGTGAAGGGTAGATCCTGGA  
GGGACAGACAGGTGTCTGATCTTTGGCAGGCAGGGATGTCTCATTGTACATTATAGGT  
ATTCAATATCTCTTGCTGGCTT

>2083

ATGGATGATGTCCTGTGAAGGGTAGATCCTGGAGGGACAGACAGGTGTCTGATCTTTG  
GCAGGCAGGGATGTCTCATTGTACATTATAGGTATTCAGTATCTCTTGCTGGCTTAGGC  
TTCATAATGTCTCATTGTACA

>2084

GTCCTGTGAAGGGTAGATCCTGGAGGGACAGACAGGTGTCTGATCTTTGGCAGGCAG  
GGATGTCTCATTGTACATTATAGGTATTCAGTATCTCTTGCTGGCTTAGGCTTCATAATG  
TCTCATTGTACATCATAGCCT

>2085

CCTGGAGGGACAGACAGGTGTCTGATCTTTGGCAGGCAGGGATGTCTCATTGTACATT  
ATAGGTATTCAGTATCTCTTGCTGGCTTAGGCTTCATAATGTCTCATTGTACATCATAGC  
CTTCAGTACCTCTTGCTGAT

>2086

TGGCAGGCAGGGATGTCTCATTGTACATTATAGGTATTCAGTATCTCTTGCTGGCTTAG  
GCTTCATAATGTCTCATTGTACATCATAGCCTTCAGTACCTCTTGCTGATTGGTTAACC

CAGTTGTTATACCACGATA

>2087

GGGATGTCTCATTTGTACATTATAGGTATTCAGTATCTCTTGCTGGCTTAGGCTTCATAAT  
GTCTCATTTGTACATCATAGCCTTCAGTACCTCTTGCTGATTTGGTTAACCCAGTTGTTAT  
ACCACGATATTGATTTTT

>2088

CATTATAGGTATTCAGTATCTCTTGCTGGCTTAGGCTTCATAATGTCTCATTTGTACATCA  
TAGCCTTCAGTACCTCTTGCTGATTTGGTTAACCCAGTTGTTATACCACGATATTGATTTT  
TCATGCCATTTTCTTTAG

>2089

GGCTTAGGCTTCATAATGTCTCATTTGTACATCATAGCCTTCAGTACCTCTTGCTGATTTG  
GTTAACCCAGTTGTTATACCACGATATTGATTTTTTCATGCCATTTTCTTTAGGAAGATTGG  
AAGATCATTGAGGATAGG

>2090

TTAGGCTTCATAATGTCTCATTTGTACATCATAGCCTTCAGTACCTCTTGCTGATTTGGTT  
AACCCAGTTGTTATACCACGATATTGATTTTTTCATGCCATTTTCTTTAGGAAGATTGGAA  
GATCATTGAGGATAGGGAC

>2091

TTATACCACGATATTGATTTTTTCATGCCATTTTCTTTAGGAAGATTGGAAGATCATTGAG  
GATAGGGACTGTGACCTTTTCTTTTTTCTACCCAGTACCCAACCTGGCAGGTAGCAC  
AGCGCAATGATCCACGATGTT

>2092

CCATTTTCTTTAGGAAGATTGGAAGATCATTGAGGATAGGGACTGTGACCTTTTCTTTTT  
TTCTACCCAGTACCCAACCTGGCAGGTAGCACAGCGCAATGATCCACGATGTTTAATA  
GGTTGAATTGTAGAGGGGGCC

>2093

GATTGGAAGATCATTGAGGATAGGGACTGTGACCTTTTCTTTTTTCTACCCAGTACC  
CAACCTGGCAGGTAGCACAGCGCAATGATCCACGATGTTTAATAGGTTGAATTGTAGA  
GGGGGCCTCTGATTCCAAAGATG

>2094

ACTGTGACCTTTTCTTTTTTCTACCCAGTACCCAACCTGGCAGGTAGCACAGCGCAA  
TGATCCACGATGTTTAATAGGTTGAATTGTAGAGGGGGCCTCTGATTCCAAAGATGGGG  
GCAGAATATCAGTCCTCTCCAG

>2095

TTTTCTTTTTTCTACCCAGTACCCAACCTGGCAGGTAGCACAGCGCAATGATCCACG  
ATGTTTAATAGGTTGAATTGTAGAGGGGGCCTCTGATTCCAAAGATGGGGGCAGAATAT  
CAGTCCTCTCCAGACTGCCTGG

>2096

TGATCCACGATGTTTAATAGGTTGAATTGTAGAGGGGGCCTCTGATTCCAAAGATGGGG  
GCAGAATATCAGTCCTCTCCAGACTGCCTGGGAATCCTCCTCTCTCCAGCCTGGGCCTG  
GCCAGTGGGAGACAGAGGCTGC

>2097

GATGGGGGCAGAATATCAGTCCTCTCCAGACTGCCTGGGAATCCTCCTCTCTCCAGCCT  
GGGCCTGGCCAGTGGGAGACAGAGGCTGCTGAAGTAGCTGGCAAGGAGGCAAAGAA

GATGATGACCTAGCTACGGTCCTCA

>2098

TCTCCAGACTGCCTGGGAATCCTCCTCTCTCCAGCCTGGGCCTGGCCAGTGGGAGACA  
GAGGCTGCTGAAGTAGCTGGCAAGGAGGCAAAGAAGATGATGACCTAGCTACGGTCC  
TCATGTGCCCACTGGGGAATCATCT

>2099

CTGGCCAGTGGGAGACAGAGGCTGCTGAAGTAGCTGGCAAGGAGGCAAAGAAGATG  
ATGACCTAGCTACGGTCCTCATGTGCCCACTGGGGAATCATCTTTTTGCATCTGAGTTA  
GTCAATGTGCTGTGCATTCTCTGCA

>2100

TGGGAGACAGAGGCTGCTGAAGTAGCTGGCAAGGAGGCAAAGAAGATGATGACCTAG  
CTACGGTCCTCATGTGCCCACTGGGGAATCATCTTTTTGCATCTGAGTTAGTCAATGTG  
CTGTGCATTCTCTGCAGAATTTGT

>2101

GAGGCAAAGAAGATGATGACCTAGCTACGGTCCTCATGTGCCCACTGGGGAATCATCT  
TTTTGCATCTGAGTTAGTCAATGTGCTGTGCATTCTCTGCAGAATTTGTGAACCTGGTAT  
AGGTATGAGGTGAGAGAGGCCA

>2102

CAAAGAAGATGATGACCTAGCTACGGTCCTCATGTGCCCACTGGGGAATCATCTTTTTG  
CATCTGAGTTAGTCAATGTGCTGTGCATTCTCTGCAGAATTTGTGAACCTGGTATAGGTA  
TGAGGTGAGAGAGGCCAGGAG

>2103

AGATGATGACCTAGCTACGGTCCTCATGTGCCCACTGGGGAATCATCTTTTTGCATCTG  
AGTTAGTCAATGTGCTGTGCATTCTCTGCAGAATTTGTGAACCTGGTATAGGTATGAGG  
TGAGAGAGGCCAGGAGGTCTGG

>2104

ATGACCTAGCTACGGTCCTCATGTGCCCACTGGGGAATCATCTTTTTGCATCTGAGTTA  
GTCAATGTGCTGTGCATTCTCTGCAGAATTTGTGAACCTGGTATAGGTATGAGGTGAGA  
GAGGCCAGGAGGTCTGGCTGCT

>2105

ATGTGCCCACTGGGGAATCATCTTTTTGCATCTGAGTTAGTCAATGTGCTGTGCATTCTC  
TGCAGAATTTGTGAACCTGGTATAGGTATGAGGTGAGAGAGGCCAGGAGGTCTGGCTG  
CTCCCCCTCTAGACTTCGCAGG

>2106

TTTTTGCATCTGAGTTAGTCAATGTGCTGTGCATTCTCTGCAGAATTTGTGAACCTGGTA  
TAGGTATGAGGTGAGAGAGGCCAGGAGGTCTGGCTGCTCCCCCTCTAGACTTCGCAGG  
TAAACCCAAGGTGTGTGCCAC

>2107

GTCAATGTGCTGTGCATTCTCTGCAGAATTTGTGAACCTGGTATAGGTATGAGGTGAGA  
GAGGCCAGGAGGTCTGGCTGCTCCCCCTCTAGACTTCGCAGGTAAACCCAAGGTGT  
GTGCCACGTAAAGGTTTCAGAGGTT

>2108

TGTGAACCTGGTATAGGTATGAGGTGAGAGAGGCCAGGAGGTCTGGCTGCTCCCCCTC  
TAGACTTCGCAGGTAAACCCAAGGTGTGTGCCACGTAAAGGTTTCAGAGGTTTTATAG

GCATCCAGATAGCACATGTGGGTC

>2109

ATAGGTATGAGGTGAGAGAGGCCAGGAGGTCTGGCTGCTCCCCCTCTAGACTTCGCAG  
GTAAAACCCAAGGTGTGTGCCACGTAAAGGTTTCAGAGGTTTTATAGGCATCCAGATAG  
CACATGTGGGTCTCTGCCCCCTGCT

>2110

GTGAGAGAGGCCAGGAGGTCTGGCTGCTCCCCCTCTAGACTTCGCAGGTAAAACCCA  
AGGTGTGTGCCACGTAAAGGTTTCAGAGGTTTTATAGGCATCCAGATAGCACATGTGGG  
TCTCTGCCCCCTGCTTGACAGCCTCCC

>2111

GAGGCCAGGAGGTCTGGCTGCTCCCCCTCTAGACTTCGCAGGTAAAACCCAAGGTGT  
GTGCCACGTAAAGGTTTCAGAGGTTTTATAGGCATCCAGATAGCACATGTGGGTCTCTGC  
CCCTGCTTGACAGCCTCCCTGGGGC

>2112

GAGGTCTGGCTGCTCCCCCTCTAGACTTCGCAGGTAAAACCCAAGGTGTGTGCCACGT  
AAAGGTTTCAGAGGTTTTATAGGCATCCAGATAGCACATGTGGGTCTCTGCCCCCTGCTTG  
CAGCCTCCCTGGGGCAGCCAGCC

>2113

TTCGCAGGTAAAACCCAAGGTGTGTGCCACGTAAAGGTTTCAGAGGTTTTATAGGCATC  
CAGATAGCACATGTGGGTCTCTGCCCCCTGCTTGACAGCCTCCCTGGGGCAGCCAGCCAG  
GCTCAGGGCAGGAAGCTGCTGATT

>2114

GTCTCTGCCCCCTGCTTGACAGCCTCCCTGGGGCAGCCAGCCAGGCTCAGGGCAGGAAG  
CTGCTGATTCTGGGTCACTTGGCTGCTCTTGCTTGCTGCTGTGATTGTTTCCTACAGT  
TAAGATCTTAGCTCCATAAGGGA

>2115

GCAGCCAGCCAGGCTCAGGGCAGGAAGCTGCTGATTCTGGGTCACTTGGCTGCTCTTG  
CTTGCTGCTGCTGTGATTGTTTCCTACAGTTAAGATCTTAGCTCCATAAGGGACATACGG  
AGGTCATCTAGGTCATCTCATGG

>2116

AGCCAGGCTCAGGGCAGGAAGCTGCTGATTCTGGGTCACTTGGCTGCTCTTGCTTGCT  
GCTGCTGTGATTGTTTCCTACAGTTAAGATCTTAGCTCCATAAGGGACATACGGAGGTCA  
TCTAGGTCATCTCATGGCTCTCA

>2117

CTGCTCTTGCTTGCTGCTGCTGTGATTGTTTCCTACAGTTAAGATCTTAGCTCCATAAGGG  
ACATACGGAGGTCATCTAGGTCATCTCATGGCTCTCAGGCAAGAAAAGTAGCATTATTG  
CTCTCATGCCCACTTTATGGA

>2118

CTTGCTGCTGCTGTGATTGTTTCCTACAGTTAAGATCTTAGCTCCATAAGGGACATACGG  
AGGTCATCTAGGTCATCTCATGGCTCTCAGGCAAGAAAAGTAGCATTATTGCTCTCATG  
CCCACTTTATGGATAAGTGACC

>2119

TTAAGATCTTAGCTCCATAAGGGACATACGGAGGTCATCTAGGTCATCTCATGGCTCTC  
AGGCAAGAAAAGTAGCATTATTGCTCTCATGCCCACTTTATGGATAAGTGACCGAGGCC

TGCAGAGGCAGAGTGGCTATTC

>2120

ATCTAGGTCATCTCATGGCTCTCAGGCAAGAAAAGTAGCATTATTGCTCTCATGCCCAC  
TTTATGGATAAGTGACCGAGGCCTGCAGAGGCAGAGTGGCTATTCCAGCCATTAAATGT  
GGCTCCCTGCTATTCTGTTCCC

>2121

GGCAAGAAAAGTAGCATTATTGCTCTCATGCCCAC TTTATGGATAAGTGACCGAGGCCT  
GCAGAGGCAGAGTGGCTATTCCAGCCATTAAATGTGGCTCCCTGCTATTCTGTTCCCTG  
CCAGGATATTCTGTGGATGGTT

>2122

CTCTCATGCCCAC TTTATGGATAAGTGACCGAGGCCTGCAGAGGCAGAGTGGCTATTCC  
AGCCATTAAATGTGGCTCCCTGCTATTCTGTTCCCTGCCAGGATATTCTGTGGATGGTTA  
GGGGAGGGGTCTTACCTCAGC

>2123

GGATAAGTGACCGAGGCCTGCAGAGGCAGAGTGGCTATTCCAGCCATTAAATGTGGCT  
CCCTGCTATTCTGTTCCCTGCCAGGATATTCTGTGGATGGTTAGGGGAGGGGTCTTACC  
TCAGCTAACGAGGTGCATTTTCT

>2124

CAGAGGCAGAGTGGCTATTCCAGCCATTAAATGTGGCTCCCTGCTATTCTGTTCCCTGC  
CAGGATATTCTGTGGATGGTTAGGGGAGGGGTCTTACCTCAGCTAACGAGGTGCATTTT  
CTGTGGGGTGAGGCCATTCTTG

>2125

AGAGTGGCTATTCCAGCCATTAAATGTGGCTCCCTGCTATTCTGTTCCCTGCCAGGATAT  
TCTGTGGATGGTTAGGGGAGGGGTCTTACCTCAGCTAACGAGGTGCATTTTCTGTGGG  
GTGAGGCCATTCTTGTCACCTA

>2126

CCAGCCATTAAATGTGGCTCCCTGCTATTCTGTTCCCTGCCAGGATATTCTGTGGATGGT  
TAGGGGAGGGGTCTTACCTCAGCTAACGAGGTGCATTTTCTGTGGGGTGAGGCCATTCT  
TTGTCACCTAGGTGTCTGAGGC

>2127

CCTGCTATTCTGTTCCCTGCCAGGATATTCTGTGGATGGTTAGGGGAGGGGTCTTACCT  
CAGCTAACGAGGTGCATTTTCTGTGGGGTGAGGCCATTCTTGTCACCTAGGTGTCTGAG  
GCCTGATGGTGTGTTGGGGAATGT

>2128

CTGCCAGGATATTCTGTGGATGGTTAGGGGAGGGGTCTTACCTCAGCTAACGAGGTGC  
ATTTTCTGTGGGGTGAGGCCATTCTTGTCACCTAGGTGTCTGAGGCCTGATGGTGTGG  
GGAATGTCCTGGTTCTATTCCCA

>2129

TGTGGATGGTTAGGGGAGGGGTCTTACCTCAGCTAACGAGGTGCATTTTCTGTGGGGT  
GAGGCCATTCTTGTCACCTAGGTGTCTGAGGCCTGATGGTGTGTTGGGGAATGTCCTGGTT  
CTATTCCCAGGGCTGTAACGTGG

>2130

TTAGGGGAGGGGTCTTACCTCAGCTAACGAGGTGCATTTTCTGTGGGGTGAGGCCATT  
CTTGTCACCTAGGTGTCTGAGGCCTGATGGTGTGTTGGGGAATGTCCTGGTTCTATTCCCA



GGGCTGTAACGTGGGGGAAGGAT

>2131

CCTCAGCTAACGAGGTGCATTTTCTGTGGGGTGAGGCCATTCTTGTCAGTTAGGTGTCT  
GAGGCCTGATGGTGTGTTGGGGAATGTCCTGGTTCTATTCCCAGGGCTGTAACGTGGGGG  
AAGGATGGAGGAAGACAGAATGG

>2132

ATTTTCTGTGGGGTGAGGCCATTCTTGTCAGTTAGGTGTCTGAGGCCTGATGGTGTGTTGG  
GGAATGTCCTGGTTCTATTCCCAGGGCTGTAACGTGGGGGAAGGATGGAGGAAGACA  
GAATGGCCTCTGGAACTTTGGAT

>2133

GCCATTCTTGTCAGTTAGGTGTCTGAGGCCTGATGGTGTGTTGGGGAATGTCCTGGTTCTA  
TTCCCAGGGCTGTAACGTGGGGGAAGGATGGAGGAAGACAGAATGGCCTCTGGAAC  
TTTGGATCTTTCTGAGTTGAGGCC

>2134

TCTTGTCAGTTAGGTGTCTGAGGCCTGATGGTGTGTTGGGGAATGTCCTGGTTCTATTCCC  
AGGGCTGTAACGTGGGGGAAGGATGGAGGAAGACAGAATGGCCTCTGGAACTTTGG  
ATCTTTCTGAGTTGAGGCCTTGTC

>2135

CCCAGGGCTGTAACGTGGGGGAAGGATGGAGGAAGACAGAATGGCCTCTGGAACTTT  
TGGATCTTTCTGAGTTGAGGCCTTGCTGGCCAACTCCGGGAGGCTGCTGGCATGGCA  
AGCAGGGTAGGGATGCCTGGCCTAG

>2136

AACGTGGGGGAAGGATGGAGGAAGACAGAATGGCCTCTGGAACTTTGGATCTTTCT  
GAGTTGAGGCCTTGCTGGCCAACTCCGGGAGGCTGCTGGCATGGCAAGCAGGGTAG  
GGATGCCTGGCCTAGCCAGGGGAGCT

>2137

AACTTTTGGATCTTTCTGAGTTGAGGCCTTGCTGGCCAACTCCGGGAGGCTGCTGGC  
ATGGCAAGCAGGGTAGGGATGCCTGGCCTAGCCAGGGGAGCTCCCTCTCTCCCCCTCTG  
CTGCCCCCTCTTTCCACCCCCATCA

>2138

TGCCTGGCCTAGCCAGGGGAGCTCCCTCTCTCCCCCTCTGCTGCCCCCTCTTTCCACCCCC  
ATCATAAACACGTGTGGACTTTCTGGTGGTGAGAAGATGGTTTTGGAGGGCTGGGCTG  
AGGTCTAGGCAGGCAAGAGCTTC

>2139

CCTGGCCTAGCCAGGGGAGCTCCCTCTCTCCCCCTCTGCTGCCCCCTCTTTCCACCCCCAT  
CATAAACACGTGTGGACTTTCTGGTGGTGAGAAGATGGTTTTGGAGGGCTGGGCTGAG  
GTCTAGGCAGGCAAGAGCTTCCA

>2140

GGAGCTCCCTCTCTCCCCCTCTGCTGCCCCCTCTTTCCACCCCCATCATAAACACGTGTGG  
ACTTTCTGGTGGTGAGAAGATGGTTTTGGAGGGCTGGGCTGAGGTCTAGGCAGGCAA  
GAGCTTCCAAATGTGTGGCTTTGA

>2141

TTCCACCCCCATCATAAACACGTGTGGACTTTCTGGTGGTGAGAAGATGGTTTTGGAG  
GGCTGGGCTGAGGTCTAGGCAGGCAAGAGCTTCCAAATGTGTGGCTTTGATTCTCAGC

CTTTTCATCCCTCAATCCTGGGAG

>2142

GACTTTCTGGTGGTGAGAAGATGGTTTTGGAGGGCTGGGCTGAGGTCTAGGCAGGCA  
AGAGCTTCCAAATGTGTGGCTTTGATTCTCAGCCTTTTCATCCCTCAATCCTGGGAGAC  
TCATTTTAAAACTTAAAAAAGGAC

>2143

CTTTTCATCCCTCAATCCTGGGAGACTCATTTTAAAACTTAAAAAAGGACTTCATTCTAT  
TGGATGCTATGTGGGCAGGCCCTGGGCTGTTGTAGAGAGGCCTGAAACCCACTTCAGT  
TTCCTGGACAGGCTGGGAGTGT

>2144

TGGGAGACTCATTTTAAAACTTAAAAAAGGACTTCATTCTATTGGATGCTATGTGGGCA  
GGCCCTGGGCTGTTGTAGAGAGGCCTGAAACCCACTTCAGTTTCCTGGACAGGCTGGG  
AGTGTGTACCCATGGGTTCCTG

>2145

GAGACTCATTTTAAAACTTAAAAAAGGACTTCATTCTATTGGATGCTATGTGGGCAGGC  
CCTGGGCTGTTGTAGAGAGGCCTGAAACCCACTTCAGTTTCCTGGACAGGCTGGGAGT  
GTGTACCCATGGGTTCCTGCTG

>2146

GGACTTCATTCTATTGGATGCTATGTGGGCAGGCCCTGGGCTGTTGTAGAGAGGCCTGA  
AACCCACTTCAGTTTCCTGGACAGGCTGGGAGTGTGTACCCATGGGTTCCTGCTGCC  
CTATTCCTGGAAGACACTAATAT

>2147

CTATGTGGGCAGGCCCTGGGCTGTTGTAGAGAGGCCTGAAACCCACTTCAGTTTCCTG  
GACAGGCTGGGAGTGTGTACCCATGGGTTCCTGCTGCCCTATTCCTGGAAGACACTA  
ATATCCCTCCCAAACCTCTGGTTG

>2148

ATGTGGGCAGGCCCTGGGCTGTTGTAGAGAGGCCTGAAACCCACTTCAGTTTCCTGGA  
CAGGCTGGGAGTGTGTACCCATGGGTTCCTGCTGCCCTATTCCTGGAAGACACTAATA  
TCCCTCCCAAACCTCTGGTTGGT

>2149

CCTGGGCTGTTGTAGAGAGGCCTGAAACCCACTTCAGTTTCCTGGACAGGCTGGGAGT  
GTGTACCCATGGGTTCCTGCTGCCCTATTCCTGGAAGACACTAATATCCCTCCCAAAC  
TCTTGGTTGGTTTCTGCTTTTTT

>2150

GGGAGTGTGTACCCATGGGTTCCTGCTGCCCTATTCCTGGAAGACACTAATATCCCTC  
CCAAACTCTTGGTTGGTTTCTGCTTTTTTTCTGTAGCATTTTGTCTTTGTGGGAAATTTT  
AAGAAACATATGTATGGCTTT

>2151

GTGTGTACCCATGGGTTCCTGCTGCCCTATTCCTGGAAGACACTAATATCCCTCCCAA  
ACTCTTGGTTGGTTTCTGCTTTTTTTCTGTAGCATTTTGTCTTTGTGGGAAATTTAAGA  
AACATATGTATGGCTTTTTGG

>2152

CCCTGCTGCCCTATTCCTGGAAGACACTAATATCCCTCCCAAACCTCTTGGTTGGTTTCTG  
CTTTTTTTCTGTAGCATTTTGTCTTTGTGGGAAATTTAAGAAACATATGTATGGCTTTTT

GGTTTCCACTTATTTATTT

>2153

CAAACCTCTTGGTTGGTTTCTGCTTTTTTCTGTAGCATTTTGTCTTTGTGGGAAATTTTA  
AGAAACATATGTATGGCTTTTTGGTTTCCACTTATTTATTTTCCCCTCTGAGTTTCAGATT  
TCATCCTTCTCCACCCCTT

>2154

GGTTTCTGCTTTTTTCTGTAGCATTTTGTCTTTGTGGGAAATTTTAAGAAACATATGTAT  
GGCTTTTTGGTTTCCACTTATTTATTTTCCCCTCTGAGTTTCAGATTTCATCCTTCTCCAC  
CCCTTCCCCCTGCCCTAA

>2155

GTCTTTGTGGGAAATTTTAAGAAACATATGTATGGCTTTTTGGTTTCCACTTATTTATTTT  
CCCCTCTGAGTTTCAGATTTCATCCTTCTCCACCCCTTCCCCCTGCCCTAAGGTGGGGC  
TAGTGCAAATCGCAGTGTGT

>2156

TTTCCACTTATTTATTTTCCCCTCTGAGTTTCAGATTTCATCCTTCTCCACCCCTTCCCCC  
TGCCCTAAGGTGGGGCTAGTGCAAATCGCAGTGTGTGTGTAGTGGGATGGTTAAAGAG  
CCGTACATCCTCACACCTGGT

>2157

ATTTATTTTCCCCTCTGAGTTTCAGATTTCATCCTTCTCCACCCCTTCCCCCTGCCCTAA  
GGTGGGGCTAGTGCAAATCGCAGTGTGTGTGTAGTGGGATGGTTAAAGAGCCGTACAT  
CCTCACACCTGGTGACGCAGAC

>2158

GTTTCAGATTTCATCCTTCTCCACCCCTTCCCCCTGCCCTAAGGTGGGGCTAGTGCAAA  
TCGCAGTGTGTGTGTAGTGGGATGGTTAAAGAGCCGTACATCCTCACACCTGGTGACG  
CAGACTAAGGCAATTAACCTTCT

>2159

TTCAGATTTCATCCTTCTCCACCCCTTCCCCCTGCCCTAAGGTGGGGCTAGTGCAAATC  
GCAGTGTGTGTGTAGTGGGATGGTTAAAGAGCCGTACATCCTCACACCTGGTGACGCA  
GACTAAGGCAATTAACCTTCTTT

>2160

AGATTTTCATCCTTCTCCACCCCTTCCCCCTGCCCTAAGGTGGGGCTAGTGCAAATCGCA  
GTGTGTGTGTAGTGGGATGGTTAAAGAGCCGTACATCCTCACACCTGGTGACGCAGAC  
TAAGGCAATTAACCTTCTTTAGT

>2161

TCCTTCTCCACCCCTTCCCCCTGCCCTAAGGTGGGGCTAGTGCAAATCGCAGTGTGTGT  
GTAGTGGGATGGTTAAAGAGCCGTACATCCTCACACCTGGTGACGCAGACTAAGGCAA  
TTAACCTTCTTTAGTAAAGACCC

>2162

CCCTTCCCCCTGCCCTAAGGTGGGGCTAGTGCAAATCGCAGTGTGTGTGTAGTGGGAT  
GGTTAAAGAGCCGTACATCCTCACACCTGGTGACGCAGACTAAGGCAATTAACCTTCT  
TTAGTAAAGACCCTTTCAGCTGGG

>2163

TAGTGGGATGGTTAAAGAGCCGTACATCCTCACACCTGGTGACGCAGACTAAGGCAAT  
TAACCTTCTTTAGTAAAGACCCTTTCAGCTGGGTGCGGTGGGAGGCACTTCGGGAGGC

CGAGGTGGAAGGATTGCTTGAGCC

>2164

CGTACATCCTCACACCTGGTGACGCAGACTAAGGCAATTAACCTTCTTTAGTAAAGACC  
CTTTCAGCTGGGTGCGGTGGGAGGCACTTCGGGAGGCCGAGGTGGAAGGATTGCTTG  
AGCCCTGGAGTTGGAGACCAGCTT

>2165

AAGGCAATTAACCTTCTTTAGTAAAGACCCTTTCAGCTGGGTGCGGTGGGAGGCACTT  
CGGGAGGCCGAGGTGGAAGGATTGCTTGAGCCCTGGAGTTGGAGACCAGCTTGGGCA  
GCATGGTGAAACCACCTCTCTAAAA

>2166

GACCCTTTCAGCTGGGTGCGGTGGGAGGCACTTCGGGAGGCCGAGGTGGAAGGATTG  
CTTGAGCCCTGGAGTTGGAGACCAGCTTGGGCAGCATGGTGAAACCACCTCTCTAAAA  
AAATATAAAAATTAACGGGACGTTG

>2167

AGGCACTTCGGGAGGCCGAGGTGGAAGGATTGCTTGAGCCCTGGAGTTGGAGACCAG  
CTTGGGCAGCATGGTGAAACCACCTCTCTAAAAAATATAAAAATTAACGGGACGTTG  
TGGCATGCACCTATAGTCCCAGCTA

>2168

TGGAGTTGGAGACCAGCTTGGGCAGCATGGTGAAACCACCTCTCTAAAAAATATAAA  
AATTAACGGGACGTTGTGGCATGCACCTATAGTCCCAGCTACTTGGGAGGCTGGGGCG  
CGAGAAGTGCTTGAACCTGAGAGA

>2169

AGTTGGAGACCAGCTTGGGCAGCATGGTGAAACCACCTCTCTAAAAAATATAAAAAT  
TAACGGGACGTTGTGGCATGCACCTATAGTCCCAGCTACTTGGGAGGCTGGGGCGCGA  
GAAGTGCTTGAACCTGAGAGATGG

>2170

TATAAAAATTAACGGGACGTTGTGGCATGCACCTATAGTCCCAGCTACTTGGGAGGCTG  
GGGCGCGAGAAGTGCTTGAACCTGAGAGATGGAGACTGCGGTGAGGCGAGATTGCAC  
CACTGCACTTCAGCTAGGTGACAG

>2171

CACCTATAGTCCCAGCTACTTGGGAGGCTGGGGCGCGAGAAGTGCTTGAACCTGAGAG  
ATGGAGACTGCGGTGAGGCGAGATTGCACCACTGCACTTCAGCTAGGTGACAGAGTG  
GGACCCTGTCTCAAAACAAAACAAA

>2172

GCGAGAAGTGCTTGAACCTGAGAGATGGAGACTGCGGTGAGGCGAGATTGCACCACT  
GCACTTCAGCTAGGTGACAGAGTGGGACCCTGTCTCAAAACAAAACAAAACAACAAC  
AAAAAAGCATGTTTTCTGTCTTTC

>2173

TGCTTGAACCTGAGAGATGGAGACTGCGGTGAGGCGAGATTGCACCACTGCACTTCA  
GCTAGGTGACAGAGTGGGACCCTGTCTCAAAACAAAACAAAACAACAAAAA  
GCATGTTTTCTGTCTTTCCTTCCTC

>2174

CTGCACTTCAGCTAGGTGACAGAGTGGGACCCTGTCTCAAAACAAAACAAAACAACA  
ACAAAAAAGCATGTTTTCTGTCTTTCCTTCCTCTCCTCCACCCCCTGGCATGAACT

CTCAACTCTTAGCCTGTGGATGTC

>2175

CAGCTAGGTGACAGAGTGGGACCCTGTCTCAAAACAAAACAAAACAACAAAAA  
AAGCATGTTTTCTGTCTTTCCCTTCCTCTCCTCCACCCCCTGGCATGAACTCTCAACTC  
TTAGCCTGTGGATGTCCGTTTCTA

>2176

AAAAAGCATGTTTTCTGTCTTTCCCTTCCTCTCCTCCACCCCCTGGCATGAACTCTCA  
ACTCTTAGCCTGTGGATGTCCGTTTCTATAAATGCTGGTGCTCGGTGGTCACCGTAGAC  
GTCCGAGCAGCCCCTGGGGCTT

>2177

CATGTTTTCTGTCTTTCCCTTCCTCTCCTCCACCCCCTGGCATGAACTCTCAACTCTTA  
GCCTGTGGATGTCCGTTTCTATAAATGCTGGTGCTCGGTGGTCACCGTAGACGTCCGAG  
CAGCCCCTGGGGCTTTGGCTT

>2178

CCTCCACCCCCTGGCATGAACTCTCAACTCTTAGCCTGTGGATGTCCGTTTCTATAAATG  
CTGGTGCTCGGTGGTCACCGTAGACGTCCGAGCAGCCCCTGGGGCTTTGGCTTGTGTT  
TTCTCTGTACTTGTGAGGGTGG

>2179

CCACCCCCTGGCATGAACTCTCAACTCTTAGCCTGTGGATGTCCGTTTCTATAAATGCT  
GGTGCTCGGTGGTCACCGTAGACGTCCGAGCAGCCCCTGGGGCTTTGGCTTGTGTTTT  
CTCTGTACTTGTGAGGGTGGTTG

>2180

CCTGGCATGAACTCTCAACTCTTAGCCTGTGGATGTCCGTTTCTATAAATGCTGGTGCTC  
GGTGGTCACCGTAGACGTCCGAGCAGCCCCTGGGGCTTTGGCTTGTGTTTTCTCTGTA  
CTTGAGGGGTGGTTGCCACTT

>2181

ATGAACTCTCAACTCTTAGCCTGTGGATGTCCGTTTCTATAAATGCTGGTGCTCGGTGG  
TCACCGTAGACGTCCGAGCAGCCCCTGGGGCTTTGGCTTGTGTTTTCTCTGTACTTGTG  
AGGGTGGTTGCCACTTCTGGCC

>2182

GTCCGTTTCTATAAATGCTGGTGCTCGGTGGTCACCGTAGACGTCCGAGCAGCCCCTGG  
GGCTTTGGCTTGTGTTTTCTCTGTACTTGTGAGGGTGGTTGCCACTTCTGGCCTTCTTT  
GTGCTTTCTTTTCTTTCCCTT

>2183

CTCGGTGGTCACCGTAGACGTCCGAGCAGCCCCTGGGGCTTTGGCTTGTGTTTTCTCT  
GTACTTGTGAGGGTGGTTGCCACTTCTGGCCTTCTTTGTGCTTTCTTTTCTTTCCCTTC  
CCCAATCTTTGTTCCCTCCCTC

>2184

GGTGGTCACCGTAGACGTCCGAGCAGCCCCTGGGGCTTTGGCTTGTGTTTTCTCTGTA  
CTTGAGGGTGGTTGCCACTTCTGGCCTTCTTTGTGCTTTCTTTTCTTTCCCTTCCCC  
AATCTTTTGTTCCTCCCTCCCT

>2185

GCAGCCCCTGGGGCTTTGGCTTGTGTTTTCTCTGTACTTGTGAGGGTGGTTGCCACTTC  
TGGCCTTCTTTGTGCTTTCTTTTCTTTCCCTTTCCCCAATCTTTTGTTCCTCCCTCCCTCC

CTCCCTCCCTTCCTCCCTTC

>2186

TACTTGTGAGGGTGGTTGCCACTTCTGGCCTTCTTTGTGCTTTCTTTTTCTTTCTTTCC  
CCAATCTTTTGTTCCTCCCTCCCTCCCTCCCTCCCTTCCTCCCTTCCTTCCTTCTGCTTTC  
CTGTTTAAAGTATATGGCT

>2187

CCTTTCCCCAATCTTTTGTTCCTCCCTCCCTCCCTCCCTCCCTTCCTCCCTTCCTTCCTTC  
TGCTTTCTGTTTAAAGTATATGGCTGCACCTAGCATGACACAGTTCCTATTTATTCCTC  
AGACTTGCTGGGACAGTCT

>2188

CCAATCTTTTGTTCCTCCCTCCCTCCCTCCCTCCCTTCCTCCCTTCCTTCCTTCTGCTTTC  
CTGTTTAAAGTATATGGCTGCACCTAGCATGACACAGTTCCTATTTATTCCTCAGACTTG  
CTGGGACAGTCTCCTCTGT

>2189

TCCCTCCCTTCCTCCCTTCCTTCCTTCTGCTTTCCTGTTTAAAGTATATGGCTGCACCTA  
GCATGACACAGTTCCTATTTATTCCTCAGACTTGCTGGGACAGTCTCCTCTGTATGCGG  
CGACTGAGGGTGGGTTCAGT

>2190

TCCTGTTTAAAGTATATGGCTGCACCTAGCATGACACAGTTCCTATTTATTCCTCAGACT  
TGCTGGGACAGTCTCCTCTGTATGCGGCGACTGAGGGTGGGTTCAGTGCCCCAGCCC  
ACTCCCCTTCCCCTTGTTTTTG

>2191

AAGTATATGGCTGCACCTAGCATGACACAGTTCCTATTTATTCCTCAGACTTGCTGGGAC  
AGTCTCCTCTGTATGCGGCGACTGAGGGTGGGTTCAGTGCCCCAGCCCCTCCCCTT  
CCCCTTGTTTTTGTCCACTTGG

>2192

TAGCATGACACAGTTCCTATTTATTCCTCAGACTTGCTGGGACAGTCTCCTCTGTATGCG  
GCGACTGAGGGTGGGTTCAGTGCCCCAGCCCCTCCCCTTCCCCTTGTTTTTGTCCA  
CTTGGCTGGACAAAGAGAACAA

>2193

TGGGACAGTCTCCTCTGTATGCGGCGACTGAGGGTGGGTTCAGTGCCCCAGCCCCT  
CCCCTTCCCCTTGTTTTTGTCCACTTGGCTGGACAAAGAGAACAAAACCAAATGGCCT  
CCCCTCCCCCTCTCCTAAACCGGT

>2194

AGTCTCCTCTGTATGCGGCGACTGAGGGTGGGTTCAGTGCCCCAGCCCCTCCCCTT  
CCCCTTGTTTTTGTCCACTTGGCTGGACAAAGAGAACAAAACCAAATGGCCTCCCCTC  
CCCCTCTCCTAAACCGGTCAAGCA

>2195

TTGTTTTTGTCCACTTGGCTGGACAAAGAGAACAAAACCAAATGGCCTCCCCTCCCCC  
TCTCCTAAACCGGTCAAGCAGTGGTATTCTGGGATGATTTTCCCTGCAACCATTAAAC  
AAGTGCTTTGATGCTTACGAGTC

>2196

GTCCACTTGGCTGGACAAAGAGAACAAAACCAAATGGCCTCCCCTCCCCCTCTCCTAA  
ACCGGTCAAGCAGTGGTATTCTGGGATGATTTTCCCTGCAACCATTAAACAAGTGCTT

TGATGCTTACGAGTCATTGGAAT

>2197

CCCTCCCCCTCTCCTAAACCGGTCAAGCAGTGGTATTCTGGGATGATTTTCCCTGCAAC  
CATTTAAACAAGTGCTTTGATGCTTACGAGTCATTGGAATGACCAGGCCTGTGCGCCCC  
TTCTCACTGACACCCTTAGACC

>2198

CCGGTCAAGCAGTGGTATTCTGGGATGATTTTCCCTGCAACCATTAAACAAGTGCTTT  
GATGCTTACGAGTCATTGGAATGACCAGGCCTGTGCGCCCCCTTCTCACTGACACCCTTA  
GACCAGGCTGGGCCTCACCTT

>2199

GGGATGATTTTCCCTGCAACCATTAAACAAGTGCTTTGATGCTTACGAGTCATTGGAA  
TGACCAGGCCTGTGCGCCCCCTTCTCACTGACACCCTTAGACCAGGCTGGGCCTCACCC  
TTTTGTCTTGCTGCCCCCTCGGTG

>2200

CATTGGAATGACCAGGCCTGTGCGCCCCCTTCTCACTGACACCCTTAGACCAGGCTGGG  
CCTCACCTTTTGTCTTGCTGCCCCCTCGGTGCCAGTGGGCGTGGGCAGTAGGACTGA  
GCAGAGGGGCCGAGGCTGTGCTGG

>2201

CCTGTGCGCCCCCTTCTCACTGACACCCTTAGACCAGGCTGGGCCTCACCTTTTGTCTT  
GCTGCCCCCTCGGTGCCAGTGGGCGTGGGCAGTAGGACTGAGCAGAGGGGGCCGAGGC  
TGTGCTGGCCGGCAGCTCTGTTAC

>2202

TCTCACTGACACCCTTAGACCAGGCTGGGCCTCACCTTTTGTCTTGCTGCCCCCTCGGT  
GCCAGTGGGCGTGGGCAGTAGGACTGAGCAGAGGGGGCCGAGGCTGTGCTGGCCGGC  
AGCTCTGTTACAGTAGAGTGGAAG

>2203

GACACCCTTAGACCAGGCTGGGCCTCACCTTTTGTCTTGCTGCCCCCTCGGTGCCAG  
TGGGCGTGGGCAGTAGGACTGAGCAGAGGGGGCCGAGGCTGTGCTGGCCGGCAGCTCT  
GTTACAGTAGAGTGGAAGGAGGTCC

>2204

CCCTTTTGTCTTGCTGCCCCCTCGGTGCCAGTGGGCGTGGGCAGTAGGACTGAGCAGA  
GGGGCCGAGGCTGTGCTGGCCGGCAGCTCTGTTACAGTAGAGTGGAAGGAGGTCCCG  
GCCAGAGGGGCAGGTCAAACAGGCC

>2205

CCTCGGTGCCAGTGGGCGTGGGCAGTAGGACTGAGCAGAGGGGGCCGAGGCTGTGCT  
GGCCGGCAGCTCTGTTACAGTAGAGTGGAAGGAGGTCCCGGCCAGAGGGGCAGGTCA  
AACAGGCCTCTTTTATTACAGTGCT

>2206

AGTGGGCGTGGGCAGTAGGACTGAGCAGAGGGGGCCGAGGCTGTGCTGGCCGGCAGCT  
CTGTTACAGTAGAGTGGAAGGAGGTCCCGGCCAGAGGGGCAGGTCAAACAGGCCTCT  
TTTATTACAGTGCTCTCTTTCACGG

>2207

GGCAGTAGGACTGAGCAGAGGGGGCCGAGGCTGTGCTGGCCGGCAGCTCTGTTACAGT  
AGAGTGGAAGGAGGTCCCGGCCAGAGGGGCAGGTCAAACAGGCCTCTTTTATTACAG

GTGCTCTCTTTACGGCCTCACTGAA

>2208

GGGGCCGAGGCTGTGCTGGCCGGCAGCTCTGTTACAGTAGAGTGGAAGGAGGTCCCG  
GCCAGAGGGGCGAGGTCAAACAGGCCTCTTTTATTTACAGTGCTCTCTTTACGGCCTC  
ACTGAAACAGGAGACCCGAGAGGCT

>2209

GCTCTGTTACAGTAGAGTGGAAGGAGGTCCCGGCCAGAGGGGCAGGTCAAACAGGCC  
TCTTTTATTTACAGTGCTCTCTTTACGGCCTCACTGAAACAGGAGACCCGAGAGGCTC  
CGGTGAAAGGGCACTGTGTTTGTG

>2210

AAACAGGCCTCTTTTATTTACAGTGCTCTCTTTACGGCCTCACTGAAACAGGAGACC  
CGAGAGGCTCCGGTGAAAGGGCACTGTGTTTGTGCATTCAGGCCTTCCAGGGCTGGCT  
ACAAAGGTGGGGGCACCCGGAGCA

>2211

ATTACAGTGCTCTCTTTACGGCCTCACTGAAACAGGAGACCCGAGAGGCTCCGGTG  
AAAGGGCACTGTGTTTGTGCATTCAGGCCTTCCAGGGCTGGCTACAAAGGTGGGGGC  
ACCCGGAGCACTGAAGGGGCTTTTT

>2212

ACAGTGCTCTCTTTACGGCCTCACTGAAACAGGAGACCCGAGAGGCTCCGGTGAAA  
GGGCACTGTGTTTGTGCATTCAGGCCTTCCAGGGCTGGCTACAAAGGTGGGGGCACCC  
GGAGCACTGAAGGGGCTTTTTGTCA

>2213

GAGACCCGAGAGGCTCCGGTGAAAGGGCACTGTGTTTGTGCATTCAGGCCTTCCAGG  
GCTGGCTACAAAGGTGGGGGCACCCGGAGCACTGAAGGGGCTTTTTGTGATTGGCAG  
TTTGGCTTAGGGGAGAAGCGAGGGAG

>2214

GTTTGTGCATTCAGGCCTTCCAGGGCTGGCTACAAAGGTGGGGGCACCCGGAGCACTG  
AAGGGGCTTTTTGTGATTGGCAGTTTGGCTTAGGGGAGAAGCGAGGGAGAGCCAGTG  
TGGGAGCCGCCTCTAGGATTGTGAG

>2215

TCAGGCCTTCCAGGGCTGGCTACAAAGGTGGGGGCACCCGGAGCACTGAAGGGGCTT  
TTTGTGATTGGCAGTTTGGCTTAGGGGAGAAGCGAGGGAGAGCCAGTGTGGGAGCCG  
CCTCTAGGATTGTGAGCAAGTGCCTG

>2216

GGCACCCGGAGCACTGAAGGGGCTTTTTGTGATTGGCAGTTTGGCTTAGGGGAGAAGC  
GAGGGAGAGCCAGTGTGGGAGCCGCCTCTAGGATTGTGAGCAAGTGCCTGTTTAGAC  
AGCTCCACGCTGCTCCTTAAACCT

>2217

TTTTTGTGATTGGCAGTTTGGCTTAGGGGAGAAGCGAGGGAGAGCCAGTGTGGGAGC  
CGCCTCTAGGATTGTGAGCAAGTGCCTGTTTAGACAGCTCCACGCTGCTCCTTAAAC  
CTATTTTGTGGTCTGGGGTTGGGGC

>2218

ATTGGCAGTTTGGCTTAGGGGAGAAGCGAGGGAGAGCCAGTGTGGGAGCCGCCTCTA  
GGATTGTGAGCAAGTGCCTGTTTAGACAGCTCCACGCTGCTCCTTAAACCTATTTTGT



GGTCTGGGGTTGGGGCGGGGGCAC

>2219

GGAGCCGCCTCTAGGATTGTGAGCAAGTGCCTGTTTAGACAGCTCCACGCTGCTCCTT  
AAAACCTATTTTGTGGTCTGGGGTTGGGGCGGGGGCACACTGCCTCGATCCTCTTGTT  
GTGTGGAGCAAAGTGATTCCTCTC

>2220

GCCGCCTCTAGGATTGTGAGCAAGTGCCTGTTTAGACAGCTCCACGCTGCTCCTTAAA  
ACCTATTTTGTGGTCTGGGGTTGGGGCGGGGGCACACTGCCTCGATCCTCTTGTTGTGT  
GGAGCAAAGTGATTCCTCTCTTC

>2221

TCCACGCTGCTCCTTAAAACCTATTTTGTGGTCTGGGGTTGGGGCGGGGGCACACTGC  
CTCGATCCTCTTGTTGTGTGGAGCAAAGTGATTCCTCTCTTCTTGTTCTCCAGATGG  
TTCCGTTGTCCTCACATCCATTG

>2222

AAAACCTATTTTGTGGTCTGGGGTTGGGGCGGGGGCACACTGCCTCGATCCTCTTGTT  
GTGTGGAGCAAAGTGATTCCTCTCTTCTTGTTCTCCAGATGGTTCCGTTGTCCTCAC  
ATCCATTGTGGTTGAGGATACAG

>2223

CTGGGGTTGGGGCGGGGGCACACTGCCTCGATCCTCTTGTTGTGTGGAGCAAAGTGAT  
TCTCTCTTCTTGTTCTCCAGATGGTTCCGTTGTCCTCACATCCATTGTGGTTGAGGA  
TACAGTGCAGAGAAGACCCCGC

>2224

GGGGCACACTGCCTCGATCCTCTTGTTGTGTGGAGCAAAGTGATTCCTCTCTTCTTG  
TTCTCCAGATGGTTCCGTTGTCCTCACATCCATTGTGGTTGAGGATACAGTGCAGAGAA  
GACCCCGCTGTCCTCTGCTCCC

>2225

TGTTGTGTGGAGCAAAGTGATTCCTCTCTTCTTGTTCTCCAGATGGTTCCGTTGTCC  
TCACATCCATTGTGGTTGAGGATACAGTGCAGAGAAGACCCCGCTGTCCTCTGCTCCC  
CCTCCTTTTCTCTCCAAAGAGAA

>2226

TGTGTGGAGCAAAGTGATTCCTCTCTTCTTGTTCTCCAGATGGTTCCGTTGTCCTCA  
CATCCATTGTGGTTGAGGATACAGTGCAGAGAAGACCCCGCTGTCCTCTGCTCCCCCTC  
CTTTTCTCTCCAAAGAGAAGTT

>2227

AGTGATTCCTCTCTTCTTGTTCTCCAGATGGTTCCGTTGTCCTCACATCCATTGTGGT  
TGAGGATACAGTGCAGAGAAGACCCCGCTGTCCTCTGCTCCCCCTCCTTTTCTCTCCAA  
AGAGAAGTTTCAGGGACAGCA

>2228

TGTTCTCCAGATGGTTCCGTTGTCCTCACATCCATTGTGGTTGAGGATACAGTGCAGAG  
AAGACCCCGCTGTCCTCTGCTCCCCCTCCTTTTCTCTCCAAAGAGAAGTTTCAGGGAC  
AGCAATAGACTTCTGTGGGGCCT

>2229

GTGGTTGAGGATACAGTGCAGAGAAGACCCCGCTGTCCTCTGCTCCCCCTCCTTTTCTC  
TCCAAAGAGAAGTTTCAGGGACAGCAATAGACTTCTGTGGGGCCTTTGTTCTTGTTAG

CTTTCATTTTTCAATTCTTCTTC

>2230

GACCCCGCTGTCCTCTGCTCCCCCTCCTTTTCTCTCCAAAGAGAAGTTTCAGGGACAG  
CAATAGACTTCTGTGGGGCCTTTGTTCCCTGTAGCTTTCATTTTTCAATTCTTCTTCTCC  
CTGTATTATCTTGCTAGGCCTT

>2231

TCCCCCTCCTTTTCTCTCCAAAGAGAAGTTTCAGGGACAGCAATAGACTTCTGTGGGG  
CCTTTGTTCCCTGTAGCTTTCATTTTTCAATTCTTCTTCTCCCTGTATTATCTTGCTAGGC  
CTTAGTTTGTGCATCTCTAAA

>2232

AGGGACAGCAATAGACTTCTGTGGGGCCTTTGTTCCCTGTAGCTTTCATTTTTCAATTCT  
TCTTCTCCCTGTATTATCTTGCTAGGCCTTAGTTTGTGCATCTCTAAAATGGGCTGGGAG  
GTGCTAGCCCATACCTAATA

>2233

TGGGGCCTTTGTTCCCTGTAGCTTTCATTTTTCAATTCTTCTTCTCCCTGTATTATCTTGC  
TAGGCCTTAGTTTGTGCATCTCTAAAATGGGCTGGGAGGTGCTAGCCCATACCTAATATA  
TAGGGCCGTCGTAAGGCTT

>2234

TTTCAATTCTTCTTCTCCCTGTATTATCTTGCTAGGCCTTAGTTTGTGCATCTCTAAAATG  
GGCTGGGAGGTGCTAGCCCATACCTAATATATAGGGCCGTCGTAAGGCTTAGGTCCCAT  
AACTCATGGGGTTGGCTTGC

>2235

TGCTAGGCCTTAGTTTGTGCATCTCTAAAATGGGCTGGGAGGTGCTAGCCCATACCTAA  
TATATAGGGCCGTCGTAAGGCTTAGGTCCCATAACTCATGGGGTTGGCTTGCACAGGGC  
TCTCTCCTTTCAGACTGGTCAG

>2236

GGGCTGGGAGGTGCTAGCCCATACCTAATATATAGGGCCGTCGTAAGGCTTAGGTCCCA  
TAACTCATGGGGTTGGCTTGCACAGGGCTCTCTCCTTTCAGACTGGTCAGGCCATGGTC  
CTTTTATGAGTCTGAAGAGCCA

>2237

GGGCCGTCGTAAGGCTTAGGTCCCATAACTCATGGGGTTGGCTTGCACAGGGCTCTCT  
CCTTTCAGACTGGTCAGGCCATGGTCCTTTTATGAGTCTGAAGAGCCAAAATGAAGAC  
CTCACTTCTAGTATCCCCAATCT

>2238

AGGCTTAGGTCCCATAACTCATGGGGTTGGCTTGCACAGGGCTCTCTCCTTTCAGACTG  
GTCAGGCCATGGTCCTTTTATGAGTCTGAAGAGCCAAAATGAAGACCTCACTTTCTAGT  
ATCCCCAATCTTCCCTCCACCT

>2239

CATAACTCATGGGGTTGGCTTGCACAGGGCTCTCTCCTTTCAGACTGGTCAGGCCATGG  
TCCTTTTATGAGTCTGAAGAGCCAAAATGAAGACCTCACTTCTAGTATCCCCAATCTT  
CCTCCCACCTTTCCCTGGCTCT

>2240

TCCTTTCAGACTGGTCAGGCCATGGTCCTTTTATGAGTCTGAAGAGCCAAAATGAAGA  
CCTCACTTCTAGTATCCCCAATCTTCCCTCCACCTTCCCTGGCTCTTGAGGGTTCTTT

GGGCATGTTCCCCTCTGGTCTC

>2241

AAGAGCCAAAATGAAGACCTCACTTTCTAGTATCCCCAATCTTCCTCCCACCTTTCCCT  
GGCTCTTGAGGGTTCTTTGGGCATGTTCCCCTCTGGTCTCCATTATTATATAGGGAAGAG  
AAATTTTCCAGAAGAATATTT

>2242

AAGACCTCACTTTCTAGTATCCCCAATCTTCCTCCCACCTTTCCCTGGCTCTTGAGGGTT  
CTTTGGGCATGTTCCCCTCTGGTCTCCATTATTATATAGGGAAGAGAAATTTTCCAGAAG  
AATATTTGAAGGATTAAAGT

>2243

ATGTTCCCCTCTGGTCTCCATTATTATATAGGGAAGAGAAATTTTCCAGAAGAATATTTG  
AAGGATTAAAGTTTGAGGTTGTAGAATATGTGAAAACACACACACACCACACCACACC  
CCAAAATCACCTTTTAAAGAA

>2244

CCTCTGGTCTCCATTATTATATAGGGAAGAGAAATTTTCCAGAAGAATATTTGAAGGATT  
AAAGTTTGAGGTTGTAGAATATGTGAAAACACACACACACCACACCACACCCCAAAT  
CACCTTTTAAAGAAGATTAAA

>2245

ATTATTATATAGGGAAGAGAAATTTTCCAGAAGAATATTTGAAGGATTAAAGTTTGAGG  
TTGTAGAATATGTGAAAACACACACACACCACACCACACCCCAAATCACCTTTTAA  
AGAAGATTAAAAAACCACCAGTG

>2246

TATGTGAAAACACACACACACCACACCACACCCCAAATCACCTTTTAAAGAAGATT  
AAAAAACCACCAGTGCCTGTCCTACATTGGTAAACTCTGGCAAGCCTCATAATGTTGA  
CTTTACTGACCTGCCTGACTTCAG

>2247

AAAACACACACACACCACACCACACCCCAAATCACCTTTTAAAGAAGATTAAAAA  
ACCACCAGTGCCTGTCCTACATTGGTAAACTCTGGCAAGCCTCATAATGTTGACTTTAC  
TGACCTGCCTGACTTCAGTGGCCG

>2248

CCCTTTTAAAGAAGATTAAAAAACCACCAGTGCCTGTCCTACATTGGTAAACTCTGGC  
AAGCCTCATAATGTTGACTTTACTGACCTGCCTGACTTCAGTGGCCGAGTCTACATGGG  
GTGTTAAGGCCCCACGTGTTTTT

>2249

AGTGCCTGTCCTACATTGGTAAACTCTGGCAAGCCTCATAATGTTGACTTTACTGACCT  
GCCTGACTTCAGTGGCCGAGTCTACATGGGGTGTTAAGGCCCCACGTGTTTTTGCCTGT  
GCCCTTTAATTGTATCTTCAGG

>2250

TCCTACATTGGTAAACTCTGGCAAGCCTCATAATGTTGACTTTACTGACCTGCCTGACT  
TCAGTGGCCGAGTCTACATGGGGTGTTAAGGCCCCACGTGTTTTTGCCTGTGCCCTTTA  
ATTGTATCTTCAGGACCATATT

>2251

CTCATAATGTTGACTTTACTGACCTGCCTGACTTCAGTGGCCGAGTCTACATGGGGTGT  
TAAGGCCCCACGTGTTTTTGCCTGTGCCCTTTAATTGTATCTTCAGGACCATATTTTTCAG

AACCAGAAATCACAGCCACAG

>2252

ACTTTACTGACCTGCCTGACTTCAGTGGCCGAGTCTACATGGGGTGTTAAGGCCCCAC  
GTGTTTTTGCCTGTGCCCTTTAATTGTATCTTCAGGACCATATTTTCAGAACCAGAAATC  
ACAGCCACAGTTTGGCAGTGGC

>2253

GCCTGACTTCAGTGGCCGAGTCTACATGGGGTGTTAAGGCCCCACGTGTTTTTGCCTGT  
GCCCTTTAATTGTATCTTCAGGACCATATTTTCAGAACCAGAAATCACAGCCACAGTTT  
GGCAGTGGCACAGAATGGTTCA

>2254

CGTGTTTTTGCCTGTGCCCTTTAATTGTATCTTCAGGACCATATTTTCAGAACCAGAAAT  
CACAGCCACAGTTTGGCAGTGGCACAGAATGGTTCAATTTAGGCCTATCCCAGAGAGG  
CTTGGGTGTCTGTGAAGTTCT

>2255

TGCCTGTGCCCTTTAATTGTATCTTCAGGACCATATTTTCAGAACCAGAAATCACAGCC  
ACAGTTTGGCAGTGGCACAGAATGGTTCAATTTAGGCCTATCCCAGAGAGGCTTGGGT  
TGTCTGTGAAGTTCTGGGTGGTC

>2256

TAATTGTATCTTCAGGACCATATTTTCAGAACCAGAAATCACAGCCACAGTTTGGCAGT  
GGCACAGAATGGTTCAATTTAGGCCTATCCCAGAGAGGCTTGGGTGTCTGTGAAGTT  
CTGGGTGGTCTGTATTGTGGAGA

>2257

AAATCACAGCCACAGTTTGGCAGTGGCACAGAATGGTTCAATTTAGGCCTATCCCAGA  
GAGGCTTGGGTGTCTGTGAAGTTCTGGGTGGTCTGTATTGTGGAGAGGTGAACACCG  
TATTGCTGGGGGTGTGGAGGGGGG

>2258

CACAGCCACAGTTTGGCAGTGGCACAGAATGGTTCAATTTAGGCCTATCCCAGAGAGG  
CTTGGGTGTCTGTGAAGTTCTGGGTGGTCTGTATTGTGGAGAGGTGAACACCGTATTG  
CTGGGGGTGTGGAGGGGGGATGT

>2259

CCACAGTTTGGCAGTGGCACAGAATGGTTCAATTTAGGCCTATCCCAGAGAGGCTTGG  
GTTGTCTGTGAAGTTCTGGGTGGTCTGTATTGTGGAGAGGTGAACACCGTATTGCTGG  
GGGTGTGGAGGGGGGATGTTGCTG

>2260

TGGCACAGAATGGTTCAATTTAGGCCTATCCCAGAGAGGCTTGGGTGTCTGTGAAGT  
TCTGGGTGGTCTGTATTGTGGAGAGGTGAACACCGTATTGCTGGGGGTGTGGAGGGGG  
GATGTTGCTGTTTCCCTGCTACAG

>2261

AGGCTTGGGTGTCTGTGAAGTTCTGGGTGGTCTGTATTGTGGAGAGGTGAACACCGT  
ATTGCTGGGGGTGTGGAGGGGGGATGTTGCTGTTTCCCTGCTACAGAAAGGCCAGGCT  
TCCTTTTCAGCCTTTTGTTCCTCG

>2262

CTGTGAAGTTCTGGGTGGTCTGTATTGTGGAGAGGTGAACACCGTATTGCTGGGGGTG  
TGGAGGGGGGATGTTGCTGTTTCCCTGCTACAGAAAGGCCAGGCTTCCTTTTCAGCCT

TTTGTTCCCCGATTCCCCTCTCTT

>2263

AGTTCTGGGTGGTCTGTATTGTGGAGAGGTGAACACCGTATTGCTGGGGGTGTGGAGG  
GGGGATGTTGCTGTTTCCCTGCTACAGAAAGGCCAGGCTTCCTTTTCAGCCTTTTGTTC  
CCCGATTCCCCTCTCTTCCTCCA

>2264

CTGGGGGTGTGGAGGGGGGATGTTGCTGTTTCCCTGCTACAGAAAGGCCAGGCTTCCT  
TTTCAGCCTTTTGTTCCTGATTCCCCTCTCTTCCTCCACTACACTCAGCCCTGCTGCTG  
CTTCCAAGGGACAACCTCCCTCT

>2265

CCCCGATTCCCCTCTCTTCCTCCACTACACTCAGCCCTGCTGCTGCTTCCAAGGGACAA  
CTCCCTCTCTTGTCTTGCCCATCTTTGAGAGAGGCGGTGAATAAACACCAAGGCAAG  
AAGAAGCAACGGGACCCCTAGAA

>2266

ACACTCAGCCCTGCTGCTGCTTCCAAGGGACAACCTCCCTCTCTTGTCTTGCCCATCTT  
TGAGAGAGGCGGTGAATAAACACCAAGGCAAGAAGAAGCAACGGGACCCCTAGAAG  
GAGATGAGTGTGTGGCCCAAGGATG

>2267

CCATCTTTGAGAGAGGCGGTGAATAAACACCAAGGCAAGAAGAAGCAACGGGACCCC  
TAGAAGGAGATGAGTGTGTGGCCCAAGGATGGTGGAGCATTGTCCTGAAAGGTAGAA  
CCAAGACTATAGCCTCCGAGGCTCTG

>2268

ATCTTTGAGAGAGGCGGTGAATAAACACCAAGGCAAGAAGAAGCAACGGGACCCCTA  
GAAGGAGATGAGTGTGTGGCCCAAGGATGGTGGAGCATTGTCCTGAAAGGTAGAACC  
AAGACTATAGCCTCCGAGGCTCTGTT

>2269

ACCAAGGCAAGAAGAAGCAACGGGACCCCTAGAAGGAGATGAGTGTGTGGCCCAAG  
GATGGTGGAGCATTGTCCTGAAAGGTAGAACCAAGACTATAGCCTCCGAGGCTCTGTT  
TACCATATTCTTGGCTCTTGTGCCAC

>2270

GAAGAAGCAACGGGACCCCTAGAAGGAGATGAGTGTGTGGCCCAAGGATGGTGGAGC  
ATTGTCCTGAAAGGTAGAACCAAGACTATAGCCTCCGAGGCTCTGTTTACCATATTCTT  
GGCTCTTGTGCCACTTCTGTGTCC

>2271

AGTGTGTGGCCCAAGGATGGTGGAGCATTGTCCTGAAAGGTAGAACCAAGACTATAGC  
CTCCGAGGCTCTGTTTACCATATTCTTGGCTCTTGTGCCACTTCTGTGTCCAGCAGCTG  
GAGCTTGTAGAAGAAAGATGGGA

>2272

GAGCATTGTCCTGAAAGGTAGAACCAAGACTATAGCCTCCGAGGCTCTGTTTACCATAT  
TCTTGGCTCTTGTGCCACTTCTGTGTCCAGCAGCTGGAGCTTGTAGAAGAAAGATGGG  
AAAGACATAGTACAGGAAATGTT

>2273

TGAAAGGTAGAACCAAGACTATAGCCTCCGAGGCTCTGTTTACCATATTCTTGGCTCTT  
GTGCCACTTCTGTGTCCAGCAGCTGGAGCTTGTAGAAGAAAGATGGGAAAGACATAGT

ACAGGAAATGTTCCCATTCAGCC

>2274

ATAGCCTCCGAGGCTCTGTTTACCATATTCTTGGCTCTTGTGCCACTTCTGTGTCCAGCA  
GCTGGAGCTTGTAGAAGAAAGATGGGAAAGACATAGTACAGGAAATGTTCCCATTCAG  
CCAGCACTGATTTATCTGCTGC

>2275

TATTCTTGGCTCTTGTGCCACTTCTGTGTCCAGCAGCTGGAGCTTGTAGAAGAAAGATG  
GGAAAGACATAGTACAGGAAATGTTCCCATTCAGCCAGCACTGATTTATCTGCTGCCTG  
GTTTCTCAGGAGGCCTAATCTG

>2276

CTTGTGCCACTTCTGTGTCCAGCAGCTGGAGCTTGTAGAAGAAAGATGGGAAAGACAT  
AGTACAGGAAATGTTCCCATTCAGCCAGCACTGATTTATCTGCTGCCTGGTTTCTCAGG  
AGGCCTAATCTGTAAGAACAGTC

>2277

GAAGAAAGATGGGAAAGACATAGTACAGGAAATGTTCCCATTCAGCCAGCACTGATTT  
ATCTGCTGCCTGGTTTCTCAGGAGGCCTAATCTGTAAGAACAGTCGAGAACTTTATTTT  
TGCCCTTTAACCTATGTCCATTT

>2278

AGTACAGGAAATGTTCCCATTCAGCCAGCACTGATTTATCTGCTGCCTGGTTTCTCAGG  
AGGCCTAATCTGTAAGAACAGTCGAGAACTTTATTTCTGCCCTTTAACCTATGTCCATTT  
TCTAGATAGTTTCTAAAAAAG

>2279

AATGTTCCCATTCAGCCAGCACTGATTTATCTGCTGCCTGGTTTCTCAGGAGGCCTAAT  
CTGTAAGAACAGTCGAGAACTTTATTTCTGCCCTTTAACCTATGTCCATTTTCTAGATAG  
TTTCTAAAAAAGGCATCACAC

>2280

GCTGCCTGGTTTCTCAGGAGGCCTAATCTGTAAGAACAGTCGAGAACTTTATTTCTGCC  
CTTTAACCTATGTCCATTTTCTAGATAGTTTCTAAAAAAGGCATCACACCAGCTCTTTGA  
GACAACATGTCATATGCAACT

>2281

GGAGGCCTAATCTGTAAGAACAGTCGAGAACTTTATTTCTGCCCTTTAACCTATGTCCA  
TTTTCTAGATAGTTTCTAAAAAAGGCATCACACCAGCTCTTTGAGACAACATGTCATAT  
GCAACTGTTGGTTTTGGGTGGA

>2282

CCCTTTAACCTATGTCCATTTTCTAGATAGTTTCTAAAAAAGGCATCACACCAGCTCTTT  
GAGACAACATGTCATATGCAACTGTTGGTTTTGGGTGGAATGAACTGAATTGTCAAC  
GGACATTTTTTCTTTCTGTATT

>2283

GTCCATTTTCTAGATAGTTTCTAAAAAAGGCATCACACCAGCTCTTTGAGACAACATGT  
CATATGCAACTGTTGGTTTTGGGTGGAATGAACTGAATTGTCAACGGACATTTTTTCT  
TTCTGTATTATGTGTTTGGA

>2284

ATTTTCTAGATAGTTTCTAAAAAAGGCATCACACCAGCTCTTTGAGACAACATGTCATA  
TGCAACTGTTGGTTTTGGGTGGAATGAACTGAATTGTCAACGGACATTTTTTCTTTCT

GTATTCATGTGTTTGGGAATAGT

>2285

AGATAGTTTCTAAAAAAGGCATCACACCAGCTCTTTGAGACAACATGTCATATGCAACT  
GTTGGTTTTGGGTGGAATGAACTGAATTGTCAACGGACATTTTTCTTTCTGTATTCAT  
GTGTTTGGGAATAGTGACAACG

>2286

GCATCACACCAGCTCTTTGAGACAACATGTCATATGCAACTGTTGGTTTTGGGTGGAAT  
GAACTGAATTGTCAACGGACATTTTTCTTTCTGTATTCATGTGTTTGGGAATAGTGACA  
ACGTCATTGGTTCAGACTTTG

>2287

AACATGTCATATGCAACTGTTGGTTTTGGGTGGAATGAACTGAATTGTCAACGGACAT  
TTTTCTTTCTGTATTCATGTGTTTGGGAATAGTGACAACGTCATTGGTTCAGACTTTGAG  
CCCCCTTCTGGTTAGGCTCTT

>2288

ATATGCAACTGTTGGTTTTGGGTGGAATGAACTGAATTGTCAACGGACATTTTTCTT  
TCTGTATTCATGTGTTTGGGAATAGTGACAACGTCATTGGTTCAGACTTTGAGCCCCCTT  
CTGGTTAGGCTCTTCAGTATAA

>2289

ATGCAACTGTTGGTTTTGGGTGGAATGAACTGAATTGTCAACGGACATTTTTCTTTC  
TGTATTCATGTGTTTGGGAATAGTGACAACGTCATTGGTTCAGACTTTGAGCCCCCTTCT  
GGTTAGGCTCTTCAGTATAAGC

>2290

TGGTTTTGGGTGGAATGAACTGAATTGTCAACGGACATTTTTCTTTCTGTATTCATGT  
GTTTGGGAATAGTGACAACGTCATTGGTTCAGACTTTGAGCCCCCTTCTGGTTAGGCTCT  
TCAGTATAAGCCCTTAAAAAT

>2291

GGTGGGAATGAACTGAATTGTCAACGGACATTTTTCTTTCTGTATTCATGTGTTTGGAA  
TAGTGACAACGTCATTGGTTCAGACTTTGAGCCCCCTTCTGGTTAGGCTCTTCAGTATA  
AGCCCTTAAAAATATTTTTGA

>2292

TTTTCTTTCTGTATTCATGTGTTTGGGAATAGTGACAACGTCATTGGTTCAGACTTTGAG  
CCCCCTTCTGGTTAGGCTCTTCAGTATAAGCCCTTAAAAATATTTTTGACTTTTCAGGGC  
CAGGCGCGGTGGCTCACGCC

>2293

ATTCATGTGTTTGGGAATAGTGACAACGTCATTGGTTCAGACTTTGAGCCCCCTTCTGGT  
TAGGCTCTTCAGTATAAGCCCTTAAAAATATTTTTGACTTTTCAGGGCCAGGCGCGGTG  
GCTCACGCCTGTAATCCCAGCA

>2294

AGCCCCCTTCTGGTTAGGCTCTTCAGTATAAGCCCTTAAAAATATTTTTGACTTTTCAGG  
GCCAGGCGCGGTGGCTCACGCCTGTAATCCCAGCACTTTGGGAGGCCGAGGCAGGTG  
GATCACGAGGTCAGGAGATCGAG

>2295

TTAGGCTCTTCAGTATAAGCCCTTAAAAATATTTTTGACTTTTCAGGGCCAGGCGCGGT  
GGCTCACGCCTGTAATCCCAGCACTTTGGGAGGCCGAGGCAGGTGGATCACGAGGTC

AGGAGATCGAGACCATCCTGGCTA

>2296

TTTTTGACTTTTCAGGGCCAGGCGCGGTGGCTCACGCCTGTAATCCCAGCACTTTGGG  
AGGCCGAGGCAGGTGGATCACGAGGTCAGGAGATCGAGACCATCCTGGCTAACACGG  
TGAAAGCCCGTCTCTACTAAAAATA

>2297

CAGGGCCAGGCGCGGTGGCTCACGCCTGTAATCCCAGCACTTTGGGAGGCCGAGGCA  
GGTGGATCACGAGGTCAGGAGATCGAGACCATCCTGGCTAACACGGTGAAAGCCCGT  
CTCTACTAAAAATACAAAAAATTAGC

>2298

CCCAGCACTTTGGGAGGCCGAGGCAGGTGGATCACGAGGTCAGGAGATCGAGACCAT  
CCTGGCTAACACGGTGAAAGCCCGTCTCTACTAAAAATACAAAAAATTAGCCAGGTGT  
GGTGGCGGGCGCCTGTAGTCCCAGC

>2299

TGGGAGGCCGAGGCAGGTGGATCACGAGGTCAGGAGATCGAGACCATCCTGGCTAAC  
ACGGTGAAAGCCCGTCTCTACTAAAAATACAAAAAATTAGCCAGGTGTGGTGGCGGGC  
GCCTGTAGTCCCAGCTACTCGAGAG

>2300

GAGATCGAGACCATCCTGGCTAACACGGTGAAAGCCCGTCTCTACTAAAAATACAAAA  
AATTAGCCAGGTGTGGTGGCGGGCGCCTGTAGTCCCAGCTACTCGAGAGGCTGAGGCT  
GGAGAATGGCGTGAACCCGGAGGC

>2301

ATCGAGACCATCCTGGCTAACACGGTGAAAGCCCGTCTCTACTAAAAATACAAAAAAT  
TAGCCAGGTGTGGTGGCGGGCGCCTGTAGTCCCAGCTACTCGAGAGGCTGAGGCTGG  
AGAATGGCGTGAACCCGGAGGCAGA

>2302

TGGCTAACACGGTGAAAGCCCGTCTCTACTAAAAATACAAAAAATTAGCCAGGTGTGG  
TGGCGGGCGCCTGTAGTCCCAGCTACTCGAGAGGCTGAGGCTGGAGAATGGCGTGAA  
CCCGGAGGCAGAGTTTGCAGTGAGC

>2303

AAAATTAGCCAGGTGTGGTGGCGGGCGCCTGTAGTCCCAGCTACTCGAGAGGCTGAG  
GCTGGAGAATGGCGTGAACCCGGAGGCAGAGTTTGCAGTGAGCTGAGGTTGTGCCAC  
TGCACTCCAGCCTGGGAGACAGAGCA

>2304

GTGGCGGGCGCCTGTAGTCCCAGCTACTCGAGAGGCTGAGGCTGGAGAATGGCGTGA  
ACCCGGAGGCAGAGTTTGCAGTGAGCTGAGGTTGTGCCACTGCACTCCAGCCTGGGA  
GACAGAGCAAGACTCCGTCTCAAAAA

>2305

GCGCCTGTAGTCCCAGCTACTCGAGAGGCTGAGGCTGGAGAATGGCGTGAACCCGGA  
GGCAGAGTTTGCAGTGAGCTGAGGTTGTGCCACTGCACTCCAGCCTGGGAGACAGAG  
CAAGACTCCGTCTCAAAAAAATAAAA

>2306

CGGAGGCAGAGTTTGCAGTGAGCTGAGGTTGTGCCACTGCACTCCAGCCTGGGAGAC  
AGAGCAAGACTCCGTCTCAAAAAAATAAAAAAATAAAAAACATTAAAAAATTGACTTTT



TGAGTAAACAAAAACCAAACGAGT

>2307

CTGGGAGACAGAGCAAGACTCCGTCTCAAAAAAATAAAAAATAAAAAACATTAAAAA  
ATTGACTTTTTGAGTAAACAAAAACCAAACGAGTCCGTGTAAAGTCTAAGATGTTGG  
TTCATCTCAACATTGGGATATTGGA

>2308

CCGTCTCAAAAAAATAAAAAATAAAAAACATTAAAAAATTGACTTTTTGAGTAAACAA  
AAACCAAACGAGTCCGTGTAAAGTCTAAGATGTTGGTTCATCTCAACATTGGGATATT  
GGAATAGGCCACTTTGGAAGGTT

>2309

CTCAAAAAAATAAAAAATAAAAAACATTAAAAAATTGACTTTTTGAGTAAACAAAAA  
CCAAACGAGTCCGTGTAAAGTCTAAGATGTTGGTTCATCTCAACATTGGGATATTGGAA  
TAGGCCACTTTGGAAGGTTTCTC

>2310

CGAGTCCGTGTAAAGTCTAAGATGTTGGTTCATCTCAACATTGGGATATTGGAATAGGC  
CACTTTGGAAGGTTTCTCTAATTGATGAAGGGCATGGGCCACCCCATGGATTGCAATGC  
TGTGGCTGTTTGGGTGGCATCC

>2311

TGGAATAGGCCACTTTGGAAGGTTTCTCTAATTGATGAAGGGCATGGGCCACCCCATG  
GATTGCAATGCTGTGGCTGTTTGGGTGGCATCCAGCTTCTAGGGGATGGTGGCAAACCT  
GGGTGTGCAGGCAGTAGGAAGGA

>2312

AGGCCACTTTGGAAGGTTTCTCTAATTGATGAAGGGCATGGGCCACCCCATGGATTGC  
AATGCTGTGGCTGTTTGGGTGGCATCCAGCTTCTAGGGGATGGTGGCAAACCTTGGGTG  
TGCAGGCAGTAGGAAGGAGGAGGT

>2313

GAAGGGCATGGGCCACCCCATGGATTGCAATGCTGTGGCTGTTTGGGTGGCATCCAGC  
TTCTAGGGGATGGTGGCAAACCTTGGGTGTGCAGGCAGTAGGAAGGAGGAGGTAGCTT  
CCAGAGAGAGCCATTGCTGGGGCTC

>2314

CACCCCATGGATTGCAATGCTGTGGCTGTTTGGGTGGCATCCAGCTTCTAGGGGATGGT  
GGCAAACCTTGGGTGTGCAGGCAGTAGGAAGGAGGAGGTAGCTTCCAGAGAGAGCCAT  
TGCTGGGGCTCAAGAAGTTTCTTT

>2315

CCCATGGATTGCAATGCTGTGGCTGTTTGGGTGGCATCCAGCTTCTAGGGGATGGTGG  
CAAACCTTGGGTGTGCAGGCAGTAGGAAGGAGGAGGTAGCTTCCAGAGAGAGCCATTG  
CTGGGGCTCAAGAAGTTTCTTTCT

>2316

TTGCAATGCTGTGGCTGTTTGGGTGGCATCCAGCTTCTAGGGGATGGTGGCAAACCTTG  
GGTGTGCAGGCAGTAGGAAGGAGGAGGTAGCTTCCAGAGAGAGCCATTGCTGGGGCT  
CAAGAAGTTTCTTTCTGGGCTCAAG

>2317

AAACTTGGGTGTGCAGGCAGTAGGAAGGAGGAGGTAGCTTCCAGAGAGAGCCATTGC  
TGGGGCTCAAGAAGTTTCTTTCTGGGCTCAAGCATGGTTGCTAGTGGTCCACACAGTG

CTTTCGTGTGAATTAGAAAAAGCAC

>2318

GAAGGAGGAGGTAGCTTCCAGAGAGAGCCATTGCTGGGGCTCAAGAAGTTTCTTTCT  
GGGCTCAAGCATGGTTGCTAGTGGTCCACACAGTGCTTTCGTGTGAATTAGAAAAAGC  
ACCCTTGTGTGGATGGATGTGGCT

>2319

AGAGAGAGCCATTGCTGGGGCTCAAGAAGTTTCTTTCTGGGGCTCAAGCATGGTTGCTA  
GTGGTCCACACAGTGCTTTCGTGTGAATTAGAAAAAGCACCCCTTGTGTGGATGGATG  
TGGCTCTTAACTAGGGTCTATCCC

>2320

ATTGCTGGGGCTCAAGAAGTTTCTTTCTGGGGCTCAAGCATGGTTGCTAGTGGTCCACA  
CAGTGCTTTCGTGTGAATTAGAAAAAGCACCCCTTGTGTGGATGGATGTGGCTCTTAAC  
TAGGGTCTATCCCACAGTGAGCT

>2321

CTTTCCTGGGGCTCAAGCATGGTTGCTAGTGGTCCACACAGTGCTTTCGTGTGAATTAGAA  
AAAGCACCCCTTGTGTGGATGGATGTGGCTCTTAACTAGGGTCTATCCCACAGTGAGCT  
GGTTGGGGCTGGATCTCAAACC

>2322

TCTGGGGCTCAAGCATGGTTGCTAGTGGTCCACACAGTGCTTTCGTGTGAATTAGAAAA  
AGCACCCCTTGTGTGGATGGATGTGGCTCTTAACTAGGGTCTATCCCACAGTGAGCTGG  
TTGGGGCTGGATCTCAAACCTCT

>2323

CTTTCGTGTGAATTAGAAAAAGCACCCCTTGTGTGGATGGATGTGGCTCTTAACTAGGG  
TCTATCCCACAGTGAGCTGGTTGGGGCTGGATCTCAAACCTCTTTGCCCCTCAATCAGA  
GGCAGGAGGTCCCTGGCCCAAG

>2324

TGAATTAGAAAAAGCACCCCTTGTGTGGATGGATGTGGCTCTTAACTAGGGTCTATCCC  
ACAGTGAGCTGGTTGGGGCTGGATCTCAAACCTCTTTGCCCCTCAATCAGAGGCAGGA  
GGTCCCTGGCCCAAGGGGCTTCC

>2325

GGGTCTATCCCACAGTGAGCTGGTTGGGGCTGGATCTCAAACCTCTTTGCCCCTCAATC  
AGAGGCAGGAGGTCCCTGGCCCAAGGGGCTTCCATGGTTGGAGTGGTCGTCAGCCGA  
AAGCTGTTCTGGTGAGATGTTTTG

>2326

GGGGCTGGATCTCAAACCTCTTTGCCCCTCAATCAGAGGCAGGAGGTCCCTGGCCCAA  
GGGGCTTCCATGGTTGGAGTGGTCGTCAGCCGAAAGCTGTTCTGGTGAGATGTTTTGA  
GCTATCAGTTCCAAGTTTCAAAG

>2327

GGATCTCAAACCTCTTTGCCCCTCAATCAGAGGCAGGAGGTCCCTGGCCCAAGGGGCT  
TCCATGGTTGGAGTGGTCGTCAGCCGAAAGCTGTTCTGGTGAGATGTTTTGAGCTATCA  
GTTCCAAGTTTCAAAGGCCAAG

>2328

CAGGAGGTCCCTGGCCCAAGGGGCTTCCATGGTTGGAGTGGTCGTCAGCCGAAAGCT  
GTTCTGGTGAGATGTTTTGAGCTATCAGTTCCAAGTTTCAAAGGCCAAGGCCTCTGG

GATCAGTTTCACTGATCCTTCAACC

>2329

CCCAAGGGGCTTCCATGGTTGGAGTGGTCGTCAGCCGAAAGCTGTTCTGGTGAGATGT  
TTTGAGCTATCAGTTCCAAGTTTCCAAAGGCCAAGGCCTCTGGGATCAGTTTCACTGAT  
CCTTCAACCAGCTTATGTGCCCT

>2330

GGCTTCCATGGTTGGAGTGGTCGTCAGCCGAAAGCTGTTCTGGTGAGATGTTTTGAGC  
TATCAGTTCCAAGTTTCCAAAGGCCAAGGCCTCTGGGATCAGTTTCACTGATCCTTCAA  
CCAGCTTATGTGCCCTGTTAGCC

>2331

GAAAGCTGTTCTGGTGAGATGTTTTGAGCTATCAGTTCCAAGTTTCCAAAGGCCAAGG  
CCTCTGGGATCAGTTTCACTGATCCTTCAACCAGCTTATGTGCCCTGTTAGCCCAGATA  
CCCCTCCAGAGTGCTTCGCACTG

>2332

GCTATCAGTTCCAAGTTTCCAAAGGCCAAGGCCTCTGGGATCAGTTTCACTGATCCTTC  
AACCAGCTTATGTGCCCTGTTAGCCCAGATACCCCTCCAGAGTGCTTCGCACTGGGCTG  
CAGGTCAGTGTTGGCCCCACACC

>2333

GTTCCAAGTTTCCAAAGGCCAAGGCCTCTGGGATCAGTTTCACTGATCCTTCAACCAG  
CTTATGTGCCCTGTTAGCCCAGATACCCCTCCAGAGTGCTTCGCACTGGGCTGCAGGTC  
ACTGTGGCCCCACACCATAGAAG

>2334

GCCTCTGGGATCAGTTTCACTGATCCTTCAACCAGCTTATGTGCCCTGTTAGCCCAGAT  
ACCCCTCCAGAGTGCTTCGCACTGGGCTGCAGGTCACTGTGGCCCCACACCATAGAAG  
CTGGGGGCCTGTCTGCATGTTCT

>2335

GATCCTTCAACCAGCTTATGTGCCCTGTTAGCCCAGATACCCCTCCAGAGTGCTTCGCA  
CTGGGCTGCAGGTCACTGTGGCCCCACACCATAGAAGCTGGGGGCCTGTCTGCATGTT  
CTGGCATCCATAAAGCTGCCTGC

>2336

TCAACCAGCTTATGTGCCCTGTTAGCCCAGATACCCCTCCAGAGTGCTTCGCACTGGGC  
TGCAGGTCACTGTGGCCCCACACCATAGAAGCTGGGGGCCTGTCTGCATGTTCTGGCA  
TCCATAAAGCTGCCTGCAAACGT

>2337

ATACCCCTCCAGAGTGCTTCGCACTGGGCTGCAGGTCACTGTGGCCCCACACCATAGA  
AGCTGGGGGCCTGTCTGCATGTTCTGGCATCCATAAAGCTGCCTGCAAACGTGAGAGG  
GGGTTTATGGCACCCTTTTAGCAT

>2338

CTGTGGCCCCACACCATAGAAGCTGGGGGCCTGTCTGCATGTTCTGGCATCCATAAAG  
CTGCCTGCAAACGTGAGAGGGGGTTTATGGCACCCTTTTAGCATGACTGTCTCTTGTGA  
CCAAGGCCAAGAAAAATAGACA

>2339

ACACCATAGAAGCTGGGGGCCTGTCTGCATGTTCTGGCATCCATAAAGCTGCCTGCAA  
ACGTGAGAGGGGGTTTATGGCACCCTTTTAGCATGACTGTCTCTTGTGACCAAGGCCA

AGAAAAATAGCACAAAGATGTAGG

>2340

GCATGTTCTGGCATCCATAAAGCTGCCTGCAAACGTGAGAGGGGGTTTATGGCACCCCT  
TTTAGCATGACTGTCTCTTGTGACCAAGGCCAAGAAAAATAGCACAAAGATGTAGGAG  
TGGTGAGGAATGAAGATGCACGTG

>2341

CTGGCATCCATAAAGCTGCCTGCAAACGTGAGAGGGGGTTTATGGCACCCCTTTTAGCAT  
GACTGTCTCTTGTGACCAAGGCCAAGAAAAATAGCACAAAGATGTAGGAGTGGTGAG  
GAATGAAGATGCACGTGCACGCGC

>2342

AGGGGGTTTATGGCACCCCTTTTAGCATGACTGTCTCTTGTGACCAAGGCCAAGAAAA  
TAGCACAAAGATGTAGGAGTGGTGAGGAATGAAGATGCACGTGCACGCGCCCTGCAG  
TCTCAGTCAATGCGCTCTTTAGGGT

>2343

ACTGTCTCTTGTGACCAAGGCCAAGAAAAATAGCACAAAGATGTAGGAGTGGTGAGG  
AATGAAGATGCACGTGCACGCGCCCTGCAGTCTCAGTCAATGCGCTCTTTAGGGTTA  
GTTTGGAACACACAGTGTCTGTCT

>2344

AAGGCCAAGAAAAATAGCACAAAGATGTAGGAGTGGTGAGGAATGAAGATGCACGTG  
CACGCGCCCTGCAGTCTCAGTCAATGCGCTCTTTAGGGTTAGTTTGGAACACACAG  
TGTCGTGTCTTATGTAACCAATTC

>2345

ATGTAGGAGTGGTGAGGAATGAAGATGCACGTGCACGCGCCCTGCAGTCTCAGTCAAT  
GCGCTCTTTAGGGTTAGTTTGGAACACACAGTGTCTGTCTTATGTAACCAATTC  
TTTCTTTTCTTTTCTTTTCTTTT

>2346

GAAGATGCACGTGCACGCGCCCTGCAGTCTCAGTCAATGCGCTCTTTAGGGTTAGTTT  
GGAAACACACAGTGTCTGTCTTATGTAACCAATTCCTTTCTTTTCTTTTCTTTTCTTT  
TTTTTTTTTTTTTTTTTGAT

>2347

AGATGCACGTGCACGCGCCCTGCAGTCTCAGTCAATGCGCTCTTTAGGGTTAGTTTGG  
AAACACACAGTGTCTGTCTTATGTAACCAATTCCTTTCTTTTCTTTTCTTTTCTTTT  
TTTTTTTTTTTTTGATGG

>2348

ACGCGCCCTGCAGTCTCAGTCAATGCGCTCTTTAGGGTTAGTTTGGAACACACAGT  
GTCGTGTCTTATGTAACCAATTCCTTTCTTTTCTTTTCTTTTCTTTTCTTTTCTTTT  
TGTGATGGAGTCTCGTGTCT

>2349

CCACAGTGTCTGTCTTATGTAACCAATTCCTTTCTTTTCTTTTCTTTTCTTTTCTTTT  
TTTTTTTGTGATGGAGTCTCGTGTCTTGCTCTGTCACCCAGGCTGGAGTGCAGTGGCT  
CGATCTCGGCTCACTGCAA

>2350

TCGTGTCTTATGTAACCAATTCCTTTCTTTTCTTTTCTTTTCTTTTCTTTTCTTTT  
GTGATGGAGTCTCGTGTCTTGCTCTGTCACCCAGGCTGGAGTGCAGTGGCTCGATCTC

GGCTCACTGCAACCTCCGCC

>2351

AATTTCTTTTCTTTTCTTTTCTTTTCTTTTTTTTTTTTTTTTTTTGTGATGGAGTCTCGTGT  
CTTGCTCTGTCAACCAGGCTGGAGTGCAGTGGCTCGATCTCGGCTCACTGCAACCTCC  
GCCTCCCAGGTTCAAGCGAC

>2352

TGTCTTGCTCTGTCAACCAGGCTGGAGTGCAGTGGCTCGATCTCGGCTCACTGCAACC  
TCCGCCTCCCAGGTTCAAGCGACTATCCTGCCTCAGCCTCCTGAGTAGCTGGGACTAC  
AGGCGCCCGCCACCACGCCAGCT

>2353

TGGCTCGATCTCGGCTCACTGCAACCTCCGCCTCCCAGGTTCAAGCGACTATCCTGCCT  
CAGCCTCCTGAGTAGCTGGGACTACAGGCGCCCGCCACCACGCCAGCTAATTTTTTG  
TGTATTTAGTAGAGACGGGGTTT

>2354

GACTATCCTGCCTCAGCCTCCTGAGTAGCTGGGACTACAGGCGCCCGCCACCACGCC  
AGCTAATTTTTTGTGTATTTAGTAGAGACGGGGTTTCACCGTGTTAGCCAGGATGGTCA  
CAATCTCCTGACCTCGTGGTCCG

>2355

GCCTCAGCCTCCTGAGTAGCTGGGACTACAGGCGCCCGCCACCACGCCAGCTAATTT  
TTTGTGTATTTAGTAGAGACGGGGTTTCACCGTGTTAGCCAGGATGGTCACAATCTCCT  
GACCTCGTGGTCCGCCCGCCTTG

>2356

CTGAGTAGCTGGGACTACAGGCGCCCGCCACCACGCCAGCTAATTTTTTGTGTATTTA  
GTAGAGACGGGGTTTCACCGTGTTAGCCAGGATGGTCACAATCTCCTGACCTCGTGGT  
CCGCCCGCCTTGGCCTCCCACAG

>2357

CTGGGACTACAGGCGCCCGCCACCACGCCAGCTAATTTTTTGTGTATTTAGTAGAGAC  
GGGGTTTCACCGTGTTAGCCAGGATGGTCACAATCTCCTGACCTCGTGGTCCGCCCGC  
CTTGGCCTCCCACAGTGCTGGGA

>2358

AATTTTTTGTGTATTTAGTAGAGACGGGGTTTCACCGTGTTAGCCAGGATGGTCACAAT  
CTCCTGACCTCGTGGTCCGCCCGCCTTGGCCTCCCACAGTGCTGGGATTACAGGCGTG  
AGCCACCACGCCCGGCCACCAAT

>2359

TTTTTGTGTATTTAGTAGAGACGGGGTTTCACCGTGTTAGCCAGGATGGTCACAATCTC  
CTGACCTCGTGGTCCGCCCGCCTTGGCCTCCCACAGTGCTGGGATTACAGGCGTGAGC  
CACCACGCCCGGCCACCAATTC

>2360

GGTTTCACCGTGTTAGCCAGGATGGTCACAATCTCCTGACCTCGTGGTCCGCCCGCCTT  
GGCCTCCCACAGTGCTGGGATTACAGGCGTGAGCCACCACGCCCGGCCACCAATTTCT  
TATACATAGGTTATGGAGCAGGG

>2361

CAGGATGGTCACAATCTCCTGACCTCGTGGTCCGCCCGCCTTGGCCTCCCACAGTGCT  
GGGATTACAGGCGTGAGCCACCACGCCCGGCCACCAATTTCTTATACATAGGTTATGGA

GCAGGGAGAAAGAGACATGCAAA

>2362

CTTGGCCTCCCACAGTGCTGGGATTACAGGCGTGAGCCACCACGCCCCGGCCACCAATT  
TCTTATACATAGGTTATGGAGCAGGGAGAAAGAGACATGCAAACAAGGCAGAATTGGG  
ACCTTTGCAAGAAGACCTTCTTCA

>2363

ATGCAAACAAGGCAGAATTGGGACCTTTGCAAGAAGACCTTCTTCACTCGCCCACCTTT  
CTCATACTTTTAGTCACCAAGGCAGGGTCTTTTTAAACAACCTTCGAGGCTCAGGCCTAG  
GGGGTTAGGAGAGTAAACCCTAA

>2364

GAATTGGGACCTTTGCAAGAAGACCTTCTTCACTCGCCCACCTTTCTCATACTTTTAGTC  
ACCAAGGCAGGGTCTTTTTAAACAACCTTCGAGGCTCAGGCCTAGGGGGTTAGGAGAGT  
AAACCCTAAATCCCTTTCACCCT

>2365

CCCACTTTCTCATACTTTTAGTCACCAAGGCAGGGTCTTTTTAAACAACCTTCGAGGCTC  
AGGCCTAGGGGGTTAGGAGAGTAAACCCTAAATCCCTTTCACCCTAGCATGCTTGGGT  
GCCGTGTTGACAAGGTCTCTGAA

>2366

CAACTTCGAGGCTCAGGCCTAGGGGGTTAGGAGAGTAAACCCTAAATCCCTTTCACCC  
TAGCATGCTTGGGTGCCGTGTTGACAAGGTCTCTGAAGTGCCCATGGGAAGCAGACCA  
GGCTCTGAGAATAATTTCCATGGA

>2367

TCGAGGCTCAGGCCTAGGGGGTTAGGAGAGTAAACCCTAAATCCCTTTCACCCTAGCA  
TGCTTGGGTGCCGTGTTGACAAGGTCTCTGAAGTGCCCATGGGAAGCAGACCAGGCT  
CTGAGAATAATTTCCATGGAATTAA

>2368

GACAAGGTCTCTGAAGTGCCCATGGGAAGCAGACCAGGCTCTGAGAATAATTTCCATG  
GAATTAATTATTGTTCTTACTCCAATAGATTTGAAATCTATTTAACTTTTCAGGGTCCCCT  
AGCTTTTTTAAATGTTTCAAGT

>2369

GAGAATAATTTCCATGGAATTAATTATTGTTCTTACTCCAATAGATTTGAAATCTATTTAA  
CTTTTCAGGGTCCCCTAGCTTTTTTAAATGTTTCAAGTGTATTCTCTCTGATAGGTTGCCT  
TTTCTCTCCCTGTAGGCTA

>2370

TTAATTATTGTTCTTACTCCAATAGATTTGAAATCTATTTAACTTTTCAGGGTCCCCTAGC  
TTTTTAAATGTTTCAAGTGTATTCTCTCTGATAGGTTGCCTTTTCTCTCCCTGTAGGCTAT  
AATTAGTGTCCCTTTACAC

>2371

GTTCTTACTCCAATAGATTTGAAATCTATTTAACTTTTCAGGGTCCCCTAGCTTTTTTAAAT  
GTTTCAAGTGTATTCTCTCTGATAGGTTGCCTTTTCTCTCCCTGTAGGCTATAATTAGTGT  
CCTTTACACAAAATTGGC

>2372

ATTTGAAATCTATTTAACTTTTCAGGGTCCCCTAGCTTTTTTAAATGTTTCAAGTGTATTCT  
CTCTGATAGGTTGCCTTTTCTCTCCCTGTAGGCTATAATTAGTGTCTTTTACACAAAATT

GGCTTAGAATTGGATTTAG

>2373

TTTTCAGGGTCCCCTAGCTTTTTTAAATGTTTCAAGTGTATTCTCTCTGATAGGTTGCCTT  
TTCTCTCCCTGTAGGCTATAATTAGTGTCTTTACACAAAATTGGCTTAGAATTGGATTT  
AGAGAAGATAAGAATCAAAT

>2374

CTATAATTAGTGTCTTTTACACAAAATTGGCTTAGAATTGGATTTAGAGAAGATAAGAAT  
CAAATTACCAGTATTTATCTTGTAATTCCAAAAGATCTACTTAAGACACTGTATTAAAA  
AAGGAGTATAAAAGAAAAGT

>2375

GTCCTTTACACAAAATTGGCTTAGAATTGGATTTAGAGAAGATAAGAATCAAATTACCA  
GTATTTATCTTGTAATTCCAAAAGATCTACTTAAGACACTGTATTAAAAAAGGAGTATA  
AAAGAAAAGTTTATTCTATGA

>2376

ATTTAGAGAAGATAAGAATCAAATTACCAGTATTTATCTTGTAATTCCAAAAGATCTAC  
TTAAGACACTGTATTAAAAAAGGAGTATAAAAGAAAAGTTTATTCTATGAAAAAGTAAA  
TTCCTCATGGTCTGAGCAACC

>2377

AGAATCAAATTACCAGTATTTATCTTGTAATTCCAAAAGATCTACTTAAGACACTGTAT  
TAAAAAAGGAGTATAAAAGAAAAGTTTATTCTATGAAAAAGTAAATTCCTCATGGTCTG  
AGCAACCAGGGGTATTTTAAT

>2378

ATTCCAAAAGATCTACTTAAGACACTGTATTAAAAAAGGAGTATAAAAGAAAAGTTTAT  
TCTATGAAAAAGTAAATTCCTCATGGTCTGAGCAACCAGGGGTATTTTAATATCAAATCT  
CCAGACTTCCCTTGGAGGCAC

>2379

ACTTAAGACACTGTATTAAAAAAGGAGTATAAAAGAAAAGTTTATTCTATGAAAAAGTA  
AATTCCTCATGGTCTGAGCAACCAGGGGTATTTTAATATCAAATCTCCAGACTTCCCTTG  
GAGGCACCTAAAATTGCCTTT

>2380

TAAAAAAGGAGTATAAAAGAAAAGTTTATTCTATGAAAAAGTAAATTCCTCATGGTCTG  
AGCAACCAGGGGTATTTTAATATCAAATCTCCAGACTTCCCTTGGAGGCACCTAAAATT  
GCCTTTTCCCTTGTCGCTCGTT

>2381

GCAACCAGGGGTATTTTAATATCAAATCTCCAGACTTCCCTTGGAGGCACCTAAAATTG  
CCTTTTCCCTTGTCGCTCGTTTTTATCTCCAGTTGAGCTTCTGAAATATGTTGCCAGGCT  
TTGGATATTGGAGAGCTGGTG

>2382

GGGGTATTTTAATATCAAATCTCCAGACTTCCCTTGGAGGCACCTAAAATTGCCTTTTCC  
CTTGTCGCTCGTTTTTATCTCCAGTTGAGCTTCTGAAATATGTTGCCAGGCTTTGGATAT  
TGGAGAGCTGGTGTGGTTTC

>2383

ATCAAATCTCCAGACTTCCCTTGGAGGCACCTAAAATTGCCTTTTCCCTTGTCGCTCGT  
TTTTATCTCCAGTTGAGCTTCTGAAATATGTTGCCAGGCTTTGGATATTGGAGAGCTGGT

GTGGTTTCAGCTTTCATTAAA

>2384

CCTTGGAGGCACCTAAAATTGCCTTTTCCCTTGTCGCTCGTTTTATCTCCAGTTGAGCT  
TCTGAAATATGTTGCCAGGCTTTGGATATTGGAGAGCTGGTGTGGTTTCAGCTTTCATTA  
AAATTCGGAGGTTTTGACTT

>2385

CTTGTCGCTCGTTTTTATCTCCAGTTGAGCTTCTGAAATATGTTGCCAGGCTTTGGATAT  
TGGAGAGCTGGTGTGGTTTCAGCTTTCATTAAAATTCGGAGGTTTTGACTTATCTATTAT  
TTCTGATTTGTGGTAAGACA

>2386

TCTGAAATATGTTGCCAGGCTTTGGATATTGGAGAGCTGGTGTGGTTTCAGCTTTCATTA  
AAATTCGGAGGTTTTGACTTATCTATTATTTCTGATTTGTGGTAAGACATAAGCCTCTAA  
AATATGCTATCTTAAAGAGA

>2387

TTGGAGAGCTGGTGTGGTTTCAGCTTTCATTAAAATTCGGAGGTTTTGACTTATCTATTA  
TTTCTGATTTGTGGTAAGACATAAGCCTCTAAAATATGCTATCTTAAAGAGATACACACA  
AATTTTATCTTAGCATGTTA

>2388

ATTTGTGGTAAGACATAAGCCTCTAAAATATGCTATCTTAAAGAGATACACACAAATTTT  
ATCTTAGCATGTTAAGTTTTTAAGCCGTTGAGAGATGGCAGAATAGACCTCTGTGGTCT  
CCTGTGTGCTTCTTCGTCCTA

>2389

TGGTAAGACATAAGCCTCTAAAATATGCTATCTTAAAGAGATACACACAAATTTTATCTT  
AGCATGTTAAGTTTTTAAGCCGTTGAGAGATGGCAGAATAGACCTCTGTGGTCTCCTGT  
GTGCTTCTTCGTCCTAAAATG

>2390

AAGCCTCTAAAATATGCTATCTTAAAGAGATACACACAAATTTTATCTTAGCATGTTAAG  
TTTTTAAGCCGTTGAGAGATGGCAGAATAGACCTCTGTGGTCTCCTGTGTGCTTCTTCG  
TCCTAAAATGTCAGCATGCTG

>2391

GAGATACACACAAATTTTATCTTAGCATGTTAAGTTTTTAAGCCGTTGAGAGATGGCAG  
AATAGACCTCTGTGGTCTCCTGTGTGCTTCTTCGTCCTAAAATGTCAGCATGCTGGTTTT  
CATGTGCTGCCTCGTACAGTA

>2392

TAGCATGTTAAGTTTTTAAGCCGTTGAGAGATGGCAGAATAGACCTCTGTGGTCTCCTG  
TGTGCTTCTTCGTCCTAAAATGTCAGCATGCTGGTTTTTCATGTGCTGCCTCGTACAGTAA  
GTCCCCAGCAGATTTAAATAA

>2393

AGTTTTTAAGCCGTTGAGAGATGGCAGAATAGACCTCTGTGGTCTCCTGTGTGCTTCTT  
CGTCCTAAAATGTCAGCATGCTGGTTTTTCATGTGCTGCCTCGTACAGTAAGTCCCCAGC  
AGATTTAAATAAGGTTGTGTCA

>2394

GTTGAGAGATGGCAGAATAGACCTCTGTGGTCTCCTGTGTGCTTCTTCGTCCTAAAATG  
TCAGCATGCTGGTTTTTCATGTGCTGCCTCGTACAGTAAGTCCCCAGCAGATTTAAATAA



GGTTGTGTCAAAACATATGCCT

>2395

AGACCTCTGTGGTCTCCTGTGTGCTTCTTCGTCCTAAAATGTCAGCATGCTGGTTTTTCAT  
GTGCTGCCTCGTACAGTAAGTCCCCAGCAGATTAAATAAGGTTGTGTCAAAACATATG  
CCTATGTTTTTTTAAACATCG

>2396

TCCTAAAATGTCAGCATGCTGGTTTTTCATGTGCTGCCTCGTACAGTAAGTCCCCAGCAG  
ATTAAATAAGGTTGTGTCAAAACATATGCCTATGTTTTTTTAAACATCGTTGTCTCATAA  
GTGTGCAGTAATGGCATATT

>2397

TAAAATGTCAGCATGCTGGTTTTTCATGTGCTGCCTCGTACAGTAAGTCCCCAGCAGATT  
TAAATAAGGTTGTGTCAAAACATATGCCTATGTTTTTTTAAACATCGTTGTCTCATAAGT  
GTGCAGTAATGGCATATTGAG

>2398

TTTCATGTGCTGCCTCGTACAGTAAGTCCCCAGCAGATTAAATAAGGTTGTGTCAAAA  
CATATGCCTATGTTTTTTTAAACATCGTTGTCTCATAAGTGTGCAGTAATGGCATATTGAG  
ACTGTTCATAGACTGGTCAG

>2399

CCCCAGCAGATTAAATAAGGTTGTGTCAAAACATATGCCTATGTTTTTTTAAACATCGT  
TGTCTCATAAGTGTGCAGTAATGGCATATTGAGACTGTTTCATAGACTGGTCAGCTGCAT  
TTCCTGCAGCCGAGGAACCCCT

>2400

CCAGCAGATTAAATAAGGTTGTGTCAAAACATATGCCTATGTTTTTTTAAACATCGTTG  
TCTCATAAGTGTGCAGTAATGGCATATTGAGACTGTTTCATAGACTGGTCAGCTGCATTTC  
CTGCAGCCGAGGAACCCTTT

>2401

AGATTTAAATAAGGTTGTGTCAAAACATATGCCTATGTTTTTTTAAACATCGTTGTCTCAT  
AAGTGTGCAGTAATGGCATATTGAGACTGTTTCATAGACTGGTCAGCTGCATTTCTTGCA  
GCCGAGGAACCCTTTATTAA

>2402

TCAAAACATATGCCTATGTTTTTTTAAACATCGTTGTCTCATAAGTGTGCAGTAATGGCA  
TATTGAGACTGTTTCATAGACTGGTCAGCTGCATTTCTGCAGCCGAGGAACCCTTTATT  
AAGGTGCATTTCTGGGGTTGA

>2403

TAATGGCATATTGAGACTGTTTCATAGACTGGTCAGCTGCATTTCTGCAGCCGAGGAAC  
CCTTTATTAAGGTGCATTTCTGGGGTTGAACTAAAACTGCTCACCCCATCAAATGAGG  
AACTTGAGGGGTTTGCAGCCC

>2404

AGACTGTTTCATAGACTGGTCAGCTGCATTTCTGCAGCCGAGGAACCCTTTATTAAGGT  
GCATTTCTGGGGTTGAACTAAAACTGCTCACCCCATCAAATGAGGAACTTGAGGGG  
TTTGCAGCCCAGCATTTTACGGG

>2405

CCTTTATTAAGGTGCATTTCTGGGGTTGAACTAAAACTGCTCACCCCATCAAATGAGG  
AACTTGAGGGGTTTGCAGCCCAGCATTTTACGGGCACTTTTGCGACTGTGTACCCTT

GCGTGGCTTCCCGCTTCAGCGAC

>2406

TGCTCACCCCATCAAATGAGGAACTTGAGGGGTTTGCAGCCCAGCATTTTACGGGC  
ACTTTTGC GACTGTGTACCCTTGCGTGGCTTCCCGCTTCAGCGACATTGTTGACTTCAG  
TTTTCTAATCTAATCTTTTTTTT

>2407

TCAAATGAGGAACTTGAGGGGTTTGCAGCCCAGCATTTTACGGGCACTTTTGC GACT  
GTGTACCCTTGCGTGGCTTCCCGCTTCAGCGACATTGTTGACTTCAGTTTTCTAATCTAA  
TTCTTTTTTTCTTTTTTGGTTT

>2408

TGCAGCCCAGCATTTTACGGGCACTTTTGC GACTGTGTACCCTTGCGTGGCTTCCCGCT  
TCAGCGACATTGTTGACTTCAGTTTTCTAATCTAATCTTTTTTTCTTTTTTGGTTTTGAT  
GAGAGTGTGGATACCAAAG

>2409

CATTTTACGGGCACTTTTGC GACTGTGTACCCTTGCGTGGCTTCCCGCTTCAGCGACAT  
TGTGACTTCAGTTTTCTAATCTAATCTTTTTTTCTTTTTTGGTTTTGATGAGAGTGTG  
GATACCAAAGCACAAACGAT

>2410

TTGCGTGGCTTCCCGCTTCAGCGACATTGTTGACTTCAGTTTTCTAATCTAATCTTTTT  
TTCTTTTTTGGTTTTGATGAGAGTGTGGATACCAAAGCACAAACGATGGATTCCTTTT  
GAAAGAACAAAAACATATTTT

>2411

CCGCTTCAGCGACATTGTTGACTTCAGTTTTCTAATCTAATCTTTTTTTCTTTTTTGGTT  
TTGATGAGAGTGTGGATACCAAAGCACAAACGATGGATTCCTTTTGAAAGAACAAAA  
ACATATTTTGTGAGCAGTTTT

>2412

GTTTTGATGAGAGTGTGGATACCAAAGCACAAACGATGGATTCCTTTTGAAAGAACA  
AAAACATATTTTGTGAGCAGTTTTACTTCTGGGAGTGTTATGTGTATACACACACACAC  
ACACACCCTAAATAATTGAAAGC

>2413

TGAGAGTGTGGATACCAAAGCACAAACGATGGATTCCTTTTGAAAGAACAAAAACAT  
ATTTTGTGAGCAGTTTTACTTCTGGGAGTGTTATGTGTATACACACACACACACACACC  
CTAAATAATTGAAAGCAGGAACT

>2414

TGTATACACACACACACACACCCTAAATAATTGAAAGCAGGAACTTGAACAGATATT  
TGCACACCCATGTTTCATAGCAGCATTAGCCAAAATAGCCAAAAGGTGGAAATAATTCA  
AATGTTTCATTGACCCATGGATAA

>2415

TGAAAGCAGGAACTTGAACAGATATTTGCACACCCATGTTTCATAGCAGCATTAGCCAA  
AATAGCCAAAAGGTGGAAATAATTCAAATGTTTCATTGACCCATGGATAAATTGACAAAA  
TGTGGTATATACATATAGTGGAA

>2416

ACAGATATTTGCACACCCATGTTTCATAGCAGCATTAGCCAAAATAGCCAAAAGGTGGA  
AATAATTCAAATGTTTCATTGACCCATGGATAAATTGACAAAATGTGGTATATACATATAGT

GGAATATTATTCAGCCTTAAC

>2417

CATTAGCCAAAATAGCCAAAAGGTGGAAATAATTCAAATGTTTCATTGACCCATGGATAA  
ATTGACAAAATGTGGTATATACATATAGTGGAATATTATTCAGCCTTAACAAGGAAGGAA  
ATTCTGACACATGGTACAACA

>2418

TAGCCAAAATAGCCAAAAGGTGGAAATAATTCAAATGTTTCATTGACCCATGGATAAATT  
GACAAAATGTGGTATATACATATAGTGGAATATTATTCAGCCTTAACAAGGAAGGAAATT  
CTGACACATGGTACAACACAG

>2419

GACAAAATGTGGTATATACATATAGTGGAATATTATTCAGCCTTAACAAGGAAGGAAATT  
CTGACACATGGTACAACACAGATTAACTTTGAGGGCATTATACTAGGTGAAATAAGCTA  
GATAGCAAAGGACAGATAGTG

>2420

TCAGCCTTAACAAGGAAGGAAATTCTGACACATGGTACAACACAGATTAACTTTGAGG  
GCATTATACTAGGTGAAATAAGCTAGATAGCAAAGGACAGATAGTGTATGGTGCCATCT  
ATATGAGGCATCTGTGCTTATAT

>2421

ATGGTACAACACAGATTAACTTTGAGGGCATTATACTAGGTGAAATAAGCTAGATAGCA  
AAGGACAGATAGTGTATGGTGCCATCTATATGAGGCATCTGTGCTTATATAAAGCAAATT  
TGTAGAAACACGAACTAGAAT

>2422

AACACAGATTAACTTTGAGGGCATTATACTAGGTGAAATAAGCTAGATAGCAAAGGAC  
AGATAGTGTATGGTGCCATCTATATGAGGCATCTGTGCTTATATAAAGCAAATTTGTAGA  
AACACGAACTAGAATAGATGTT

>2423

ATTATACTAGGTGAAATAAGCTAGATAGCAAAGGACAGATAGTGTATGGTGCCATCTATA  
TGAGGCATCTGTGCTTATATAAAGCAAATTTGTAGAAACACGAACTAGAATAGATGTTG  
CCAGGAGCTGGGGAGAGAGGG

>2424

TAGATAGCAAAGGACAGATAGTGTATGGTGCCATCTATATGAGGCATCTGTGCTTATATA  
AAGCAAATTTGTAGAAACACGAACTAGAATAGATGTTGCCAGGAGCTGGGGAGAGAG  
GGGAATGGGGAGTTAAGGTTGAG

>2425

ATGGTGCCATCTATATGAGGCATCTGTGCTTATATAAAGCAAATTTGTAGAAACACGAAC  
TAGAATAGATGTTGCCAGGAGCTGGGGAGAGAGGGGAATGGGGAGTTAAGGTTGAGT  
GGGTACAGAGTTTCAGTTGGGGG

>2426

TAAAGCAAATTTGTAGAAACACGAACTAGAATAGATGTTGCCAGGAGCTGGGGAGAG  
AGGGGAATGGGGAGTTAAGGTTGAGTGGGTACAGAGTTTCAGTTGGGGGAGATGAAA  
AAGTTCTGTGGCTGGATGGTAGTAAT

>2427

AAATTTGTAGAAACACGAACTAGAATAGATGTTGCCAGGAGCTGGGGAGAGAGGGGA  
ATGGGGAGTTAAGGTTGAGTGGGTACAGAGTTTCAGTTGGGGGAGATGAAAAAGTTC

TGTGGCTGGATGGTAGTAATGGTTAC

>2428

GCTGGGGAGAGAGGGGAATGGGGAGTTAAGGTTGAGTGGGTACAGAGTTTCAGTTGG  
GGGAGATGAAAAAGTTCTGTGGCTGGATGGTAGTAATGGTTACACAACATCAGGAGTG  
TACTAAATGACACTGATCTGTACAC

>2429

GGAGAGAGGGGAATGGGGAGTTAAGGTTGAGTGGGTACAGAGTTTCAGTTGGGGGAG  
ATGAAAAAGTTCTGTGGCTGGATGGTAGTAATGGTTACACAACATCAGGAGTGTA  
AATGACACTGATCTGTACACTTAGA

>2430

AATGGGGAGTTAAGGTTGAGTGGGTACAGAGTTTCAGTTGGGGGAGATGAAAAAGTT  
CTGTGGCTGGATGGTAGTAATGGTTACACAACATCAGGAGTGTA  
TACTAAATGACACTGATCTGTACACTTAGAATCTTTAAAAT

>2431

CAGAGTTTCAGTTGGGGGAGATGAAAAAGTTCTGTGGCTGGATGGTAGTAATGGTTAC  
ACAACATCAGGAGTGTA  
TACTAAATGACACTGATCTGTACACTTAGAATCTTTAAAATGGT  
AAATTTTAGTTACATAGTTTAC

>2432

GAAAAAGTTCTGTGGCTGGATGGTAGTAATGGTTACACAACATCAGGAGTGTA  
TAAATGACACTGATCTGTACACTTAGAATCTTTAAAATGGTAAATTTTAGTTACATAGTTTAC  
TACAATAAAAATGTATTTTATG

>2433

TAGTAATGGTTACACAACATCAGGAGTGTA  
TAAATGACACTGATCTGTACACTTAGAA  
TCTTTAAAATGGTAAATTTTAGTTACATAGTTTACTACAATAAAAATGTATTTTATGTTA  
ATTGCAATACTTGGCATTG

>2434

ATCAGGAGTGTA  
TAAATGACACTGATCTGTACACTTAGAATCTTTAAAATGGTAAATTT  
TAGTTACATAGTTTACTACAATAAAAATGTATTTTATGTTAATTGCAATACTTGGCATT  
TGAGAAAAAATTCTTAGAAA

>2435

AACTGATCTGTACACTTAGAATCTTTAAAATGGTAAATTTTAGTTACATAGTTTACTA  
CAATAAAAATGTATTTTATGTTAATTGCAATACTTGGCATTGAGAAAAAATTCTTAGAA  
AATACTGAGAATATCATACT

>2436

TGTACACTTAGAATCTTTAAAATGGTAAATTTTAGTTACATAGTTTACTACAATAAAAA  
TGATTTTATGTTAATTGCAATACTTGGCATTGAGAAAAAATTCTTAGAAAATACTGAG  
AATATCATACTGATAAAAAC

>2437

AAAATACTGAGAATATCATACTGATAAAAACCCTCTGCTAAATTTTTTTTAAAAAAAC  
ACACATCGCCTGTACTCCTGAGTATCAGCGATCAGTCTAGCGTTGCCCTTAACTATCAT  
TATTGTTATTGTTAAAGTGAT

>2438

GAATATCATACTGATAAAAACCCTCTGCTAAATTTTTTTTAAAAAAACACACATCGCCT  
GTACTCCTGAGTATCAGCGATCAGTCTAGCGTTGCCCTTAACTATCATTATTGTTATTGT

TAAAGTGATTTTTATTAAG

>2439

ATAAAAACCCTCTGCTAAATTTTTTTTAAAAAAACACACATCGCCTGTACTCCTGAGT  
ATCAGCGATCAGTCTAGCGTTGCCCTTTAACTATCATTATTGTTATTGTTAAAGTGATTTT  
TATTAAGTGCTATCTCTCAA

>2440

AAAAACACACATCGCCTGTACTCCTGAGTATCAGCGATCAGTCTAGCGTTGCCCTTTAA  
CTATCATTATTGTTATTGTTAAAGTGATTTTTATTAAGTGCTATCTCTCAAGTGGTATGATT  
ACTTGTTGAGGTCTTGTGT

>2441

ACACATCGCCTGTACTCCTGAGTATCAGCGATCAGTCTAGCGTTGCCCTTTAACTATCAT  
TATTGTTATTGTTAAAGTGATTTTTATTAAGTGCTATCTCTCAAGTGGTATGATTACTTGT  
TGAGGTCTTGTGTTGGTAT

>2442

CGCCTGTACTCCTGAGTATCAGCGATCAGTCTAGCGTTGCCCTTTAACTATCATTATTGT  
TATTGTTAAAGTGATTTTTATTAAGTGCTATCTCTCAAGTGGTATGATTACTTGTTGAGGT  
CTTGTGTTGGTATTTGTCA

>2443

AGTATCAGCGATCAGTCTAGCGTTGCCCTTTAACTATCATTATTGTTATTGTTAAAGTGAT  
TTTTATTAAGTGCTATCTCTCAAGTGGTATGATTACTTGTTGAGGTCTTGTGTTGGTATTT  
GTCATGTGATTCTAGAAA

>2444

TTAACTATCATTATTGTTATTGTTAAAGTGATTTTTATTAAGTGCTATCTCTCAAGTGGTAT  
GATTACTTGTTGAGGTCTTGTGTTGGTATTTGTCATGTGATTCTAGAAAAATCTCCCCCT  
TTTTGGCTCTGAGACATT

>2445

ATCATTATTGTTATTGTTAAAGTGATTTTTATTAAGTGCTATCTCTCAAGTGGTATGATTA  
CTTGTTGAGGTCTTGTGTTGGTATTTGTCATGTGATTCTAGAAAAATCTCCCCCTTTTTG  
GCTCTGAGACATTCTCTAG

>2446

TATTGTTATTGTTAAAGTGATTTTTATTAAGTGCTATCTCTCAAGTGGTATGATTACTTGT  
TGAGGTCTTGTGTTGGTATTTGTCATGTGATTCTAGAAAAATCTCCCCCTTTTTGGCTCT  
GAGACATTCTCTAGTTGAC

>2447

TATTGTTAAAGTGATTTTTATTAAGTGCTATCTCTCAAGTGGTATGATTACTTGTTGAGGT  
CTTGTTGTTGGTATTTGTCATGTGATTCTAGAAAAATCTCCCCCTTTTTGGCTCTGAGACA  
TTCTCTAGTTGACCTCTC

>2448

GGTCTTGTGTTGGTATTTGTCATGTGATTCTAGAAAAATCTCCCCCTTTTTGGCTCTGAG  
ACATTCTCTAGTTGACCTCTTCCCAGAGAGAAGTTAAGGAAAATCTTCCGCTCTGATTT  
TTTTTCTTTCTGCACTTAAA

>2449

TGTGATTCTAGAAAAATCTCCCCCTTTTTGGCTCTGAGACATTCTCTAGTTGACCTCTTC  
CCAGAGAGAAGTTAAGGAAAATCTTCCGCTCTGATTTTTTTTTCTTTCTGCACTTAAAT

AATTAAATAATATCTGTGGCC

>2450

AGAGAAGTTAAGGAAAATCTTCCGCTCTGATTTTTTTTTCTTTCTGCACTTAAATAATTA  
AATAATATCTGTGGCCTTACAACACAGGGAGGTTTCAGTGAGGAAGAAAATTCAACTG  
CATTTGCAAAATGTCTGAAAAT

>2451

TGATTTTTTTTTCTTTCTGCACTTAAATAATTAATAATATCTGTGGCCTTACAACACAGG  
GAGGTTTCAGTGAGGAAGAAAATTCAACTGCATTTGCAAAATGTCTGAAAATTATGGG  
AGAGATGTTTCTGCTTTTAGA

>2452

AATAATATCTGTGGCCTTACAACACAGGGAGGTTTCAGTGAGGAAGAAAATTCAACTG  
CATTTGCAAAATGTCTGAAAATTATGGGAGAGATGTTTCTGCTTTTAGACTTGGTACGTA  
TGTGGTCAGGTTTTTCAGAGGTT

>2453

CACAGGGAGGTTTCAGTGAGGAAGAAAATTCAACTGCATTTGCAAAATGTCTGAAAAT  
TATGGGAGAGATGTTTCTGCTTTTAGACTTGGTACGTATGTGGTCAGGTTTTTCAGAGGT  
TTTCTATTCACCATCTGTGACGG

>2454

GGAAGAAAATTCAACTGCATTTGCAAAATGTCTGAAAATTATGGGAGAGATGTTTCTG  
CTTTTAGACTTGGTACGTATGTGGTCAGGTTTTTCAGAGGTTTTCTATTCACCATCTGTGA  
CGGGCCTTGTCTCCTCCTGCAA

>2455

GAAAATTCAACTGCATTTGCAAAATGTCTGAAAATTATGGGAGAGATGTTTCTGCTTTT  
AGACTTGGTACGTATGTGGTCAGGTTTTTCAGAGGTTTTCTATTCACCATCTGTGACGGG  
CCTTGTCTCCTCCTGCAACTGG

>2456

AATGTCTGAAAATTATGGGAGAGATGTTTCTGCTTTTAGACTTGGTACGTATGTGGTCA  
GGTTTTTCAGAGGTTTTCTATTCACCATCTGTGACGGGCCTTGTCTCCTCCTGCAACTGG  
TGGCAGATGTAGCCAGAGATTT

>2457

GAGAGATGTTTCTGCTTTTAGACTTGGTACGTATGTGGTCAGGTTTTTCAGAGGTTTTCTA  
TTCACCATCTGTGACGGGCCTTGTCTCCTCCTGCAACTGGTGGCAGATGTAGCCAGAG  
ATTTTGTGAGCTTCTCAACAGC

>2458

TGCTTTTAGACTTGGTACGTATGTGGTCAGGTTTTTCAGAGGTTTTCTATTCACCATCTGT  
GACGGGCCTTGTCTCCTCCTGCAACTGGTGGCAGATGTAGCCAGAGATTTTGTGAGCT  
TCTCAACAGCATCTTTTTCCTG

>2459

CGTATGTGGTCAGGTTTTTCAGAGGTTTTCTATTCACCATCTGTGACGGGCCTTGTCTCCT  
CCTGCAACTGGTGGCAGATGTAGCCAGAGATTTTGTGAGCTTCTCAACAGCATCTTTT  
CCTGCTCTTCTCCCTCCTC

>2460

TTTTCTATTCACCATCTGTGACGGGCCTTGTCTCCTCCTGCAACTGGTGGCAGATGTAG  
CCAGAGATTTTGTGAGCTTCTCAACAGCATCTTTTTTCTGCTCTTCTTCCCTCCTCTTT

GTTTGGTTTTTTATTACATGA

>2461

GCAGATGTAGCCAGAGATTTTGTGAGCTTCTCAACAGCATCTTTTTCTGCTCTTCTTC  
CCTTCCTCTTTGTTTGGTTTTTTATTACATGAAAATTTAAAGACCCATAAGGAAATTCAA  
AGTGAAAATCTATGCCCAAAT

>2462

TGTAGCCAGAGATTTTGTGAGCTTCTCAACAGCATCTTTTTCTGCTCTTCTTCCCTTCC  
TCTTTGTTTGGTTTTTTATTACATGAAAATTTAAAGACCCATAAGGAAATTCAAAGTGA  
AAATCTATGCCCAAATAAGTC

>2463

CTCTTCTTCCCTTCCTCTTTGTTTGGTTTTTTATTACATGAAAATTTAAAGACCCATAAG  
GAAATTCAAAGTGAAAATCTATGCCCAAATAAGTCAGGATCTCAAGATGAAAATATAAG  
TTCTGGAAATGGAAGTTTCCT

>2464

TTGGTTTTTTATTACATGAAAATTTAAAGACCCATAAGGAAATTCAAAGTGAAAATCTA  
TGCCCAAATAAGTCAGGATCTCAAGATGAAAATATAAGTTCTGGAAATGGAAGTTTCCT  
CTGCCCCCGTGGTGGTATCATA

>2465

AAGACCCATAAGGAAATTCAAAGTGAAAATCTATGCCCAAATAAGTCAGGATCTCAAG  
ATGAAAATATAAGTTCTGGAAATGGAAGTTTCCTCTGCCCCCGTGGTGGTATCATAGCC  
AGCAGCCTCGTTCTGTGCTTTTG

>2466

ATTCAAAGTGAAAATCTATGCCCAAATAAGTCAGGATCTCAAGATGAAAATATAAGTTC  
TGGAATGGAAGTTTCCTCTGCCCCCGTGGTGGTATCATAGCCAGCAGCCTCGTTCTGT  
GCTTTTGAAGGTTTAATGGCCT

>2467

AGATGAAAATATAAGTTCTGGAAATGGAAGTTTCCTCTGCCCCCGTGGTGGTATCATAG  
CCAGCAGCCTCGTTCTGTGCTTTTGAAGGTTTAATGGCCTGCATGTGAAGGTAGGGGC  
GCACTATATATATAGTACCAGGC

>2468

AAAATATAAGTTCTGGAAATGGAAGTTTCCTCTGCCCCCGTGGTGGTATCATAGCCAGC  
AGCCTCGTTCTGTGCTTTTGAAGGTTTAATGGCCTGCATGTGAAGGTAGGGGCGCACTA  
TATATATAGTACCAGGCGTGTG

>2469

CCTCTGCCCCCGTGGTGGTATCATAGCCAGCAGCCTCGTTCTGTGCTTTTGAAGGTTTA  
ATGGCCTGCATGTGAAGGTAGGGGCGCACTATATATATAGTACCAGGCGTGTGGGCGCA  
CTGGCACGGATCTGAAAAAGCG

>2470

AGCAGCCTCGTTCTGTGCTTTTGAAGGTTTAATGGCCTGCATGTGAAGGTAGGGGCGC  
ACTATATATATAGTACCAGGCGTGTGGGCGCACTGGCACGGATCTGAAAAAGCGTAAGT  
TTGGCATTCTAGGTTTATTTTA

>2471

GTTCTGTGCTTTTGAAGGTTTAATGGCCTGCATGTGAAGGTAGGGGCGCACTATATATAT  
AGTACCAGGCGTGTGGGCGCACTGGCACGGATCTGAAAAAGCGTAAGTTTGGCATTTC

TAGGTTTATTTTAAACTTACAA

>2472

TGTGAAGGTAGGGGCGCACTATATATATAGTACCAGGCGTGTGGGCGCACTGGCACGGA  
TCTGAAAAAGCGTAAGTTTGGCATTCTAGGTTTATTTTAAACTTACAACCTTTAACGC  
CAGACACAGAGCTTCTTTCCCA

>2473

AAGGTAGGGGCGCACTATATATATAGTACCAGGCGTGTGGGCGCACTGGCACGGATCTG  
AAAAAGCGTAAGTTTGGCATTCTAGGTTTATTTTAAACTTACAACCTTTAACGCCAGA  
CACAGAGCTTCTTTCCCACTTA

>2474

TATATATATAGTACCAGGCGTGTGGGCGCACTGGCACGGATCTGAAAAAGCGTAAGTTT  
GGCATTCTAGGTTTATTTTAAACTTACAACCTTTAACGCCAGACACAGAGCTTCTTTCC  
CACTTAATGTAACCTATACATT

>2475

TTGGCATTCTAGGTTTATTTTAAACTTACAACCTTTAACGCCAGACACAGAGCTTCTTT  
CCCACTTAATGTAACCTATACATTGATTGCTTTTAATTAGTGTTGGATCTTTTTTGGTGTTT  
TGCAGCTTGGGATATATAA

>2476

ACAACCTTTAACGCCAGACACAGAGCTTCTTTCCCACTTAATGTAACCTATACATTGATT  
GCTTTTAATTAGTGTTGGATCTTTTTTGGTGTTTTGCAGCTTGGGATATATAAAAAGTCT  
GACTTAAATTTAAAAA

>2477

ACACAGAGCTTCTTTCCCACTTAATGTAACCTATACATTGATTGCTTTTAATTAGTGTTGG  
ATCTTTTTTGGTGTTTTGCAGCTTGGGATATATAAAAAGTCTGACTTAAATTTAAAAA  
AAAAAGCTAACTCCTGACA

>2478

ACAGAGCTTCTTTCCCACTTAATGTAACCTATACATTGATTGCTTTTAATTAGTGTTGGATC  
TTTTTTGGTGTTTTGCAGCTTGGGATATATAAAAAGTCTGACTTAAATTTAAAAA  
AAAAGCTAACTCCTGACATT

>2479

ACTATACATTGATTGCTTTTAATTAGTGTTGGATCTTTTTTGGTGTTTTGCAGCTTGGGAT  
ATATAAAAAGTCTGACTTAAATTTAAAAAAGCTAACTCCTGACATTCTCAG  
AGTCTTGCAAAAACCAGCAC

>2480

AGCTTGGGATATATAAAAAGTCTGACTTAAATTTAAAAAAGCTAACTCCTG  
ACATTCTACGAGTCTTGCAAAAACCAGCACGGGAGCCTTAGAAATTCTAACCTCCTC  
GTCCTCTTTATTTTATCTTGAGT

>2481

AGCTAACTCCTGACATTCTCACGAGTCTTGCAAAAACCAGCACGGGAGCCTTAGAAAT  
TCTAACCTCCTCGTCCTCTTTATTTTATCTTGAGTCAGGTGGGCCAAGAAGCAAGGGA  
AGAGTCCAATATAACATACTTAA

>2482

GAGTCTTGCAAAAACCAGCACGGGAGCCTTAGAAATTCTAACCTCCTCGTCCTCTTTAT  
TTTTATCTTGAGTCAGGTGGGCCAAGAAGCAAGGGAAGAGTCCAATATAACATACTTAA



TGGATGGAGGTAATTCCTTGG

>2483

TTAGAAATCTAACCTCCTCGTCCTCTTTATTTTTATCTTGAGTCAGGTGGGCCAAGAAG  
CAAGGGAAGAGTCCAATATAACATACTTAATGGATGGAGGTAATTCCTTGGACTGTTT  
TGGCAGAAATTAAGCATCTGT

>2484

ATTTTTATCTTGAGTCAGGTGGGCCAAGAAGCAAGGGAAGAGTCCAATATAACATACTT  
AATGGATGGAGGTAATTCCTTGGACTGTTTTGGCAGAAATTAAGCATCTGTATTTAGAT  
AAAGGTAGTGGTGGGTTGGAT

>2485

AGGTGGGCCAAGAAGCAAGGGAAGAGTCCAATATAACATACTTAATGGATGGAGGTAA  
TTTCCTTGGACTGTTTTGGCAGAAATTAAGCATCTGTATTTAGATAAAGGTAGTGGTGG  
GTTGGATTTTCATAGCATAAGCA

>2486

GAGTCCAATATAACATACTTAATGGATGGAGGTAATTCCTTGGACTGTTTTGGCAGAA  
ATTAAGCATCTGTATTTAGATAAAGGTAGTGGTGGGTTGGATTTTCATAGCATAAGCATA  
GTTGCTGAAGATCAATAATAT

>2487

ATACTTAATGGATGGAGGTAATTCCTTGGACTGTTTTGGCAGAAATTAAGCATCTGTAT  
TTAGATAAAGGTAGTGGTGGGTTGGATTTTCATAGCATAAGCATAGTTGCTGAAGATCA  
ATAATATCAAATAATGGGTTC

>2488

GATGGAGGTAATTCCTTGGACTGTTTTGGCAGAAATTAAGCATCTGTATTTAGATAAA  
GGTAGTGGTGGGTTGGATTTTCATAGCATAAGCATAGTTGCTGAAGATCAATAATATCAA  
ATAATGGGTTCTTGGTGAGGG

>2489

AAAGGTAGTGGTGGGTTGGATTTTCATAGCATAAGCATAGTTGCTGAAGATCAATAATA  
TCAAATAATGGGTTCTTGGTGAGGGGGAAAGGAAATGGGGGAGGGGTCTTTTCACTCA  
ACAGTTTGGAATGCTAATGATT

>2490

GTGGTGGGTTGGATTTTCATAGCATAAGCATAGTTGCTGAAGATCAATAATATCAAATAA  
TGGGTTCTTGGTGAGGGGGAAAGGAAATGGGGGAGGGGTCTTTTCACTCAACAGTTT  
GGAAATGCTAATGATTATTTGTG

>2491

TCAATAATATCAAATAATGGGTTCTTGGTGAGGGGGAAAGGAAATGGGGGAGGGGTCT  
TTTCACTCAACAGTTTGGAATGCTAATGATTATTTGTGGTTTTTCAGCCCAGAATTCTTC  
ATATTTGCTTGCAAGCTTCTAT

>2492

TTGGTGAGGGGGAAAGGAAATGGGGGAGGGGTCTTTTCACTCAACAGTTTGGAATG  
CTAATGATTATTTGTGGTTTTTCAGCCCAGAATTCTTCATATTTGCTTGCAAGCTTCTATGG  
CACTGCCGAATTCTACAGTAAA

>2493

TATTTGTGGTTTTTCAGCCCAGAATTCTTCATATTTGCTTGCAAGCTTCTATGGCACTGCC  
GAATTCTACAGTAAATATTTTCGGACATCCTCAGCCCTGTTCTCCTTTCCCTTCAGTAAAT

TACATATTAAAGTAGCCTGG

>2494

TCATATTTGCTTGCAAGCTTCTATGGCACTGCCGAATTCTACAGTAAATATTTTCGGACAT  
CCTCAGCCCTGTTCTCCTTTCCCTTCAGTAAATTACATATTAAAGTAGCCTGGTAACTGA  
GCACTGGTTGCTGTGAGATA

>2495

CTTCTATGGCACTGCCGAATTCTACAGTAAATATTTTCGGACATCCTCAGCCCTGTTCTCC  
TTTCCCTTCAGTAAATTACATATTAAAGTAGCCTGGTAACTGAGCACTGGTTGCTGTGA  
GATAAGGGCTGGGAAATCAAT

>2496

AATTCTACAGTAAATATTTTCGGACATCCTCAGCCCTGTTCTCCTTTCCCTTCAGTAAATT  
ACATATTAAAGTAGCCTGGTAACTGAGCACTGGTTGCTGTGAGATAAGGGCTGGGAAA  
TCAATATGTTTGCCATGTGGCT

>2497

ACATCCTCAGCCCTGTTCTCCTTTCCCTTCAGTAAATTACATATTAAAGTAGCCTGGTAA  
CTGAGCACTGGTTGCTGTGAGATAAGGGCTGGGAAATCAATATGTTTGCCATGTGGCTG  
CTTGTTTATGACACCTGCCTC

>2498

TCAGCCCTGTTCTCCTTTCCCTTCAGTAAATTACATATTAAAGTAGCCTGGTAACTGAGC  
ACTGGTTGCTGTGAGATAAGGGCTGGGAAATCAATATGTTTGCCATGTGGCTGCTTGTT  
TATGACACCTGCCTCTAGAAC

>2499

AAATTACATATTAAAGTAGCCTGGTAACTGAGCACTGGTTGCTGTGAGATAAGGGCTGG  
GAAATCAATATGTTTGCCATGTGGCTGCTTGTTTATGACACCTGCCTCTAGAACAGTTG  
AGCAATGTTCTGTTTGTTAAAG

>2500

TGAGATAAGGGCTGGGAAATCAATATGTTTGCCATGTGGCTGCTTGTTTATGACACCTG  
CCTCTAGAACAGTTGAGCAATGTTCTGTTTGTTAAAGCTGCATTCAGAAGCTTGTATC  
CTCCTAAAACAACCGTGATCTT

>2501

GCTGGGAAATCAATATGTTTGCCATGTGGCTGCTTGTTTATGACACCTGCCTCTAGAAC  
AGTTGAGCAATGTTCTGTTTGTTAAAGCTGCATTCAGAAGCTTGTATCCTCCTAAAAC  
AACCGTGATCTTACTGGGGGAG

>2502

TTGTTTATGACACCTGCCTCTAGAACAGTTGAGCAATGTTCTGTTTGTTAAAGCTGCAT  
TTCAGAAGCTTGTATCCTCCTAAAACAACCGTGATCTTACTGGGGGAGAGAGAGGTGC  
TACAACAGATATTGATTTTAGTT

>2503

CTAGAACAGTTGAGCAATGTTCTGTTTGTTAAAGCTGCATTCAGAAGCTTGTATCCTC  
CTAAAACAACCGTGATCTTACTGGGGGAGAGAGAGGTGCTACAACAGATATTGATTTT  
AGTTTTTCTAAGTATGGAATTAC

>2504

TTTGTTAAAGCTGCATTCAGAAGCTTGTATCCTCCTAAAACAACCGTGATCTTACTGG  
GGGAGAGAGAGGTGCTACAACAGATATTGATTTTAGTTTTTCTAAGTATGGAATTACAC

TTCTAAACAGTGGTCTTACAGC

>2505

CTTGTATCCTCCTAAAACAACCGTGATCTTACTGGGGGAGAGAGAGGGTGCTACAACAG  
ATATTGATTTTAGTTTTTCTAAGTATGGAATTACACTTCTAAACAGTGGTCTTACAGCCT  
GTGATTTTTTCCCATGAGGAG

>2506

CCTAAAACAACCGTGATCTTACTGGGGGAGAGAGAGGGTGCTACAACAGATATTGATTTT  
AGTTTTTCTAAGTATGGAATTACACTTCTAAACAGTGGTCTTACAGCCTGTGATTTTTTC  
CCCATGAGGAGGAGATGTAGA

>2507

GGGGGAGAGAGAGGGTGCTACAACAGATATTGATTTTAGTTTTTCTAAGTATGGAATTAC  
ACTTCTAAACAGTGGTCTTACAGCCTGTGATTTTTTCCCATGAGGAGGAGATGTAGAT  
ACTCTGAATATATATACACA

>2508

GCTACAACAGATATTGATTTTAGTTTTTCTAAGTATGGAATTACACTTCTAAACAGTGGT  
CTTACAGCCTGTGATTTTTTCCCATGAGGAGGAGATGTAGATACTCTGAATATATATATA  
CACATACACATATATAA

>2509

TCTAAGTATGGAATTACACTTCTAAACAGTGGTCTTACAGCCTGTGATTTTTTCCCATG  
AGGAGGAGATGTAGATACTCTGAATATATATATACACATACACACATATATAAAATAAATC  
TATTTTATAATGTTTATGA

>2510

GAGGAGATGTAGATACTCTGAATATATATATACACATACACACATATATAAAATAAATCTA  
TTTTATAATGTTTATGATGTGGTCAGTTAAAAAAGGAGTGTAGTTTATAATAAGGAAGTG  
TAGGTATTATTAGATTTA

>2511

TAGATACTCTGAATATATATATACACATACACACATATATAAAATAAATCTATTTTATAATG  
TTTATGATGTGGTCAGTTAAAAAAGGAGTGTAGTTTATAATAAGGAAGTGTAGGTATTAT  
TTAGATTTATCTCCTCTC

>2512

TACACATACACATATATAAAATAAATCTATTTTATAATGTTTATGATGTGGTCAGTTAA  
AAAAGGAGTGTAGTTTATAATAAGGAAGTGTAGGTATTATTAGATTTATCTCCTCTCTT  
GGCACCTGGCTTAAAAAAA

>2513

ACATACACACATATATAAAATAAATCTATTTTATAATGTTTATGATGTGGTCAGTTAAAAA  
AGGAGTGTAGTTTATAATAAGGAAGTGTAGGTATTATTAGATTTATCTCCTCTCTTGGC  
ACCTGGCTTAAAAAAA

>2514

TAAATAAATCTATTTTATAATGTTTATGATGTGGTCAGTTAAAAAAGGAGTGTAGTTTAT  
AATAAGGAAGTGTAGGTATTATTAGATTTATCTCCTCTCTTGGCACCTGGCTTAAAAAA  
AAAAAAGTAGTAACAAGA

>2515

TATAATAAGGAAGTGTAGGTATTATTAGATTTATCTCCTCTCTTGGCACCTGGCTTAAA  
AAAAAAGTAGTAACAAGAAACATAGCAGCTGCTGGGAAACATGCATTTTAATCT

AAGTCTCCAGTGTGGTTTTAGT

>2516

AATAAGGAAGTGTAGGTATTATTTAGATTTATCTCCTCTCTTGGCACCTGGCTTAAAAAA  
AAAAAAAGTAGTAACAAGAAACATAGCAGCTGCTGGGAAACATGCATTTTAATCTAAG  
TCTCCAGTGTGGTTTTAGTTTA

>2517

CTGGCTTAAAAAAAAAAAAAGTAGTAACAAGAAACATAGCAGCTGCTGGGAAACATG  
CATTTTAATCTAAGTCTCCAGTGTGGTTTTAGTTTAACCAGTGGATGATACTGTAGTCTC  
AAGGCTTAGCCTGCTGGTGAGTC

>2518

AAAAAAAAAAAAAGTAGTAACAAGAAACATAGCAGCTGCTGGGAAACATGCATTTTA  
ATCTAAGTCTCCAGTGTGGTTTTAGTTTAACCAGTGGATGATACTGTAGTCTCAAGGCTT  
AGCCTGCTGGTGAGTCAATGGTT

>2519

AAGTAGTAACAAGAAACATAGCAGCTGCTGGGAAACATGCATTTTAATCTAAGTCTCC  
AGTGTGGTTTTAGTTTAACCAGTGGATGATACTGTAGTCTCAAGGCTTAGCCTGCTGGT  
GAGTCAATGGTTCTTAAAGCTGT

>2520

CTGCTGGGAAACATGCATTTTAATCTAAGTCTCCAGTGTGGTTTTAGTTTAACCAGTGG  
ATGATACTGTAGTCTCAAGGCTTAGCCTGCTGGTGAGTCAATGGTTCTTAAAGCTGTGT  
GGTGTGAGCTCAAGTGAGCGAA

>2521

AATCTAAGTCTCCAGTGTGGTTTTAGTTTAACCAGTGGATGATACTGTAGTCTCAAGGC  
TTAGCCTGCTGGTGAGTCAATGGTTCTTAAAGCTGTGTGGTGTGAGCTCAAGTGAGCG  
AAGCAGTGTGTGGTGTGTGTGCA

>2522

TAAGTCTCCAGTGTGGTTTTAGTTTAACCAGTGGATGATACTGTAGTCTCAAGGCTTAG  
CCTGCTGGTGAGTCAATGGTTCTTAAAGCTGTGTGGTGTGAGCTCAAGTGAGCGAAGC  
AGTGTGTGGTGTGTGTGCATTGG

>2523

TAGTTTAACCAGTGGATGATACTGTAGTCTCAAGGCTTAGCCTGCTGGTGAGTCAATGG  
TTCTTAAAGCTGTGTGGTGTGAGCTCAAGTGAGCGAAGCAGTGTGTGGTGTGTGTGCA  
TTGGAGGGTGAGGGGTATGAGGA

>2524

TCAAGGCTTAGCCTGCTGGTGAGTCAATGGTTCTTAAAGCTGTGTGGTGTGAGCTCAA  
GTGAGCGAAGCAGTGTGTGGTGTGTGTCATTGGAGGGTGAGGGGTATGAGGAGGTA  
GTCAGCCTTGGAGGGAGAAGGGAGA

>2525

AAGGCTTAGCCTGCTGGTGAGTCAATGGTTCTTAAAGCTGTGTGGTGTGAGCTCAAGT  
GAGCGAAGCAGTGTGTGGTGTGTGTCATTGGAGGGTGAGGGGTATGAGGAGGTAGT  
CAGCCTTGGAGGGAGAAGGGAGACA

>2526

TTAGCCTGCTGGTGAGTCAATGGTTCTTAAAGCTGTGTGGTGTGAGCTCAAGTGAGCG  
AAGCAGTGTGTGGTGTGTGTGTCATTGGAGGGTGAGGGGTATGAGGAGGTAGTCAGCC

TTGGAGGGAGAAGGGAGACAGGCTA

>2527

AATGGTTCTTAAAGCTGTGTGGTGTGTCAGCTCAAGTGAGCGAAGCAGTGTGTGGTGTGT  
GTGCATTGGAGGGTGAGGGGTATGAGGAGGTAGTCAGCCTTGGAGGGAGAAGGGAGA  
CAGGCTAGGTCTTCTTCACGTGGCC

>2528

GGTGTGTCAGCTCAAGTGAGCGAAGCAGTGTGTGGTGTGTGTGCATTGGAGGGTGAGGG  
GTATGAGGAGGTAGTCAGCCTTGGAGGGAGAAGGGAGACAGGCTAGGTCTTCTTCAC  
GTGGCCTTCCATTTTGAAAAACAGAA

>2529

TGTGTGTGCATTGGAGGGTGAGGGGTATGAGGAGGTAGTCAGCCTTGGAGGGAGAAG  
GGAGACAGGCTAGGTCTTCTTCACGTGGCCTTCCATTTTGAAAAACAGAAGCGATGAT  
ACAACCTCTCTTCTTGCCCAAGGGA

>2530

TGGAGGGTGAGGGGTATGAGGAGGTAGTCAGCCTTGGAGGGAGAAGGGAGACAGGCT  
AGGTCTTCTTCACGTGGCCTTCCATTTTGAAAAACAGAAGCGATGATACAACCTCTCTT  
CTTGCCCAAGGGATTGAGTAGAAA

>2531

TCTTCACGTGGCCTTCCATTTTGAAAAACAGAAGCGATGATACAACCTCTCTTCTTGCC  
CAAGGGATTGAGTAGAAAAAATACATTTCCAAACACATTGCGCTACAGTCATTGAAC  
TTCAAAGTGTAAGCATGGATTG

>2532

TGATACAACCTCTCTTCTTGCCCAAGGGATTGAGTAGAAAAAATACATTTCCAAACAC  
ATTGCGCTACAGTCATTGAACTTCAAAGTGTAAGCATGGATTGTGTTGGTGCACCTTGT  
GGGTGCCCATGACACACACTCT

>2533

CTTGCCCAAGGGATTGAGTAGAAAAAATACATTTCCAAACACATTGCGCTACAGTCAT  
TGAACCTCAAAGTGTAAGCATGGATTGTGTTGGTGCACCTTGTGGGTGCCCATGACAC  
ACACTCTTCAATGCTCCTGTGCC

>2534

AGTAGAAAAAATACATTTCCAAACACATTGCGCTACAGTCATTGAACTTCAAAGTG  
TAAAGCATGGATTGTGTTGGTGCACCTTGTGGGTGCCCATGACACACACTCTTCAATGCTC  
CTGTGCCTTCCTAAGAGGTGTCT

>2535

TCCAAACACATTGCGCTACAGTCATTGAACTTCAAAGTGTAAGCATGGATTGTGTTGG  
TGCACTTGTGGGTGCCCATGACACACACTCTTCAATGCTCCTGTGCCTTCCTAAGAGGT  
GTCTGTCTTTCTCAACCCCACT

>2536

TCAAAGTGTAAGCATGGATTGTGTTGGTGCACCTTGTGGGTGCCCATGACACACACTC  
TTCAATGCTCCTGTGCCTTCCTAAGAGGTGTCTGTCTTTCTCAACCCCACTGTGTGTCC  
TCTGACGTCTAGTGGATTGCTGC

>2537

TGGATTGTGTTGGTGCACCTTGTGGGTGCCCATGACACACACTCTTCAATGCTCCTGTGC  
CTTCCTAAGAGGTGTCTGTCTTTCTCAACCCCACTGTGTGTCTCTGACGTCTAGTGGA

TTGCTGCATACACAGTCAACCC

>2538

GGGTGCCCATGACACACACTCTTCAATGCTCCTGTGCCTTCCTAAGAGGTGTCTGTCTT  
TCTCAACCCCAGTGTGTGTCCTCTGACGTCTAGTGGATTGCTGCATACACAGTCAACCC  
TCCTTAAAAGGTTTAAAAAGAA

>2539

GTGCCCATGACACACACTCTTCAATGCTCCTGTGCCTTCCTAAGAGGTGTCTGTCTTTC  
TCAACCCCAGTGTGTGTCCTCTGACGTCTAGTGGATTGCTGCATACACAGTCAACCCTC  
CTTAAAAGGTTTAAAAAGAAAC

>2540

CACTCTTCAATGCTCCTGTGCCTTCCTAAGAGGTGTCTGTCTTTCTCAACCCCAGTGTG  
TGTCTCTGACGTCTAGTGGATTGCTGCATACACAGTCAACCCTCCTTAAAAGGTTTAA  
AAAGAAACATGAGCTCCCTTTT

>2541

CCTAAGAGGTGTCTGTCTTTCTCAACCCCAGTGTGTGTCCTCTGACGTCTAGTGGATTG  
CTGCATACACAGTCAACCCTCCTTAAAAGGTTTAAAAAGAAACATGAGCTCCCTTTTA  
GAGCACCCCAAAGCAGCTGCATT

>2542

TTCTCAACCCCAGTGTGTGTCCTCTGACGTCTAGTGGATTGCTGCATACACAGTCAACC  
CTCCTTAAAAGGTTTAAAAAGAAACATGAGCTCCCTTTTAGAGCACCCCAAAGCAGCT  
GCATTCTTGAGTTGGTGCCCTGC

>2543

CCCTCCTTAAAAGGTTTAAAAAGAAACATGAGCTCCCTTTTAGAGCACCCCAAAGCAG  
CTGCATTCTTGAGTTGGTGCCCTGCACTGGGATTCCCATGGACTGGGAACATGATCTCT  
TAATGACACTAATATATTCTGAG

>2544

CCTTAAAAGGTTTAAAAAGAAACATGAGCTCCCTTTTAGAGCACCCCAAAGCAGCTGC  
ATTCTTGAGTTGGTGCCCTGCACTGGGATTCCCATGGACTGGGAACATGATCTCTTAAT  
GACACTAATATATTCTGAGATCT

>2545

CACTGGGATTCCCATGGACTGGGAACATGATCTCTTAATGACACTAATATATTCTGAGAT  
CTGATTTTTTTGTTTGTGTGTTTTTTAACCCAGGTTGGCAGGTTCTCCTTAATCAGTAGTG  
GCAAAATGTCTCTTTCCTTT

>2546

GGGATTCCCATGGACTGGGAACATGATCTCTTAATGACACTAATATATTCTGAGATCTGA  
TTTTTTGTTTGTGTGTTTTTTAACCCAGGTTGGCAGGTTCTCCTTAATCAGTAGTGGCAA  
AATGTCTCTTTCCTTTCTCC

>2547

TAATATATTCTGAGATCTGATTTTTTTGTTTGTGTGTTTTTTAACCCAGGTTGGCAGGTTCT  
CCTTAATCAGTAGTGGCAAATGTCTCTTTCCTTTCTCCACGTAATGCTAAATGGCTTAT  
CCAGTCATCTCTCTGCT

>2548

TATATTCTGAGATCTGATTTTTTTGTTTGTGTGTTTTTTAACCCAGGTTGGCAGGTTCTCCT  
TAATCAGTAGTGGCAAATGTCTCTTTCCTTTCTCCACGTAATGCTAAATGGCTTATCCA

GTCATCTCTCTCTGCTCAT

>2549

GTGTTTTTTTAACCCAGGTTGGCAGGTTCTCCTTAATCAGTAGTGGCAAAATGTCTCTTT  
CCTTTCTCCACGTAATGCTAAATGGCTTATCCAGTCATCTCTCTCTGCTCATGGTCAGCC  
CGAGGTGACAGTTAAAATTGG

>2550

AGGTTCTCCTTAATCAGTAGTGGCAAAATGTCTCTTTCCCTTTCTCCACGTAATGCTAAAT  
GGCTTATCCAGTCATCTCTCTCTGCTCATGGTCAGCCCGAGGTGACAGTTAAAATTGGA  
TGGAGGTAGCTTGGGGTAGGA

>2551

TGGCAAAATGTCTCTTTCCCTTTCTCCACGTAATGCTAAATGGCTTATCCAGTCATCTCTC  
TCTGCTCATGGTCAGCCCGAGGTGACAGTTAAAATTGGATGGAGGTAGCTTGGGGTAG  
GAAGACTTGGTGATTTTGGCGG

>2552

CTCTTTCCCTTTCTCCACGTAATGCTAAATGGCTTATCCAGTCATCTCTCTCTGCTCATGGT  
CAGCCCGAGGTGACAGTTAAAATTGGATGGAGGTAGCTTGGGGTAGGAAGACTTGGT  
GATTTTGGCGGCACTGGGTCAA

>2553

TATCCAGTCATCTCTCTCTGCTCATGGTCAGCCCGAGGTGACAGTTAAAATTGGATGGA  
GGTAGCTTGGGGTAGGAAGACTTGGTGATTTTGGCGGCACTGGGTCAAACCCAGGGA  
AACTGAAGCTGTGTCTGCACAGCT

>2554

CTCTCTGCTCATGGTCAGCCCGAGGTGACAGTTAAAATTGGATGGAGGTAGCTTGGGG  
TAGGAAGACTTGGTGATTTTGGCGGCACTGGGTCAAACCCAGGGAACTGAAGCTGT  
GTCTGCACAGCTGGTTGAAAGGCTG

>2555

CCGAGGTGACAGTTAAAATTGGATGGAGGTAGCTTGGGGTAGGAAGACTTGGTGATTT  
TGGCGGCACTGGGTCAAACCCAGGGAACTGAAGCTGTGTCTGCACAGCTGGTTGAA  
AGGCTGTGTTGTGATCCAGGGATT

>2556

GGAGGTAGCTTGGGGTAGGAAGACTTGGTGATTTTGGCGGCACTGGGTCAAACCCAG  
GGAACTGAAGCTGTGTCTGCACAGCTGGTTGAAAGGCTGTGTTGTGATCCAGGGATT  
TAAGTAAAAATATTCTTTCCTTACC

>2557

AGGTAGCTTGGGGTAGGAAGACTTGGTGATTTTGGCGGCACTGGGTCAAACCCAGGG  
AACTGAAGCTGTGTCTGCACAGCTGGTTGAAAGGCTGTGTTGTGATCCAGGGATT  
AGTAAAAATATTCTTTCCTTACCAC

>2558

TAGGAAGACTTGGTGATTTTGGCGGCACTGGGTCAAACCCAGGGAACTGAAGCTGT  
GTCTGCACAGCTGGTTGAAAGGCTGTGTTGTGATCCAGGGATTAAAGTAAAAATATTCT  
TTCCTTACCACCCTCTATGCCCC

>2559

TGATTTTGGCGGCACTGGGTCAAACCCAGGGAACTGAAGCTGTGTCTGCACAGCTG  
GTTGAAAGGCTGTGTTGTGATCCAGGGATTAAAGTAAAAATATTCTTTCCTTACCACCC

TCTATGCCCCCTACTCCCCAGTAA

>2560

CTGTGTTGTGATCCAGGGATTTAAGTAAAAATATTCTTTTCCTTACCACCCTCTATGCCCC  
CTACTCCCCAGTAATATAGTAGGCATGGGGGTTGACTTATTTTGAGGGGACTAGTATGTA  
TTAATATTTTCATCTAATTT

>2561

TGATCCAGGGATTTAAGTAAAAATATTCTTTTCCTTACCACCCTCTATGCCCCCTACTCCC  
CAGTAATATAGTAGGCATGGGGGTTGACTTATTTTGAGGGGACTAGTATGTATTTAATAT  
TTCATCTAATTTTTGTAGCC

>2562

ACCACCCTCTATGCCCCCTACTCCCCAGTAATATAGTAGGCATGGGGGTTGACTTATTTT  
GAGGGGACTAGTATGTATTTAATATTTTCATCTAATTTTTGTAGCCCTGGCCTGGCTGGAT  
GACAAAAGTGTTTAAACTAA

>2563

CCCTCTATGCCCCCTACTCCCCAGTAATATAGTAGGCATGGGGGTTGACTTATTTTGAGG  
GGACTAGTATGTATTTAATATTTTCATCTAATTTTTGTAGCCCTGGCCTGGCTGGATGACA  
AAAGTGTTTAAACTAAGACC

>2564

AATATAGTAGGCATGGGGGTTGACTTATTTTGAGGGGACTAGTATGTATTTAATATTTTCAT  
CTAATTTTTGTAGCCCTGGCCTGGCTGGATGACAAAAGTGTTTAAACTAAGACCGATT  
GAGCAAGTATTTTATCCTCC

>2565

TTTGAGGGGACTAGTATGTATTTAATATTTTCATCTAATTTTTGTAGCCCTGGCCTGGCTGG  
ATGACAAAAGTGTTTAAACTAAGACCGATTTGAGCAAGTATTTTATCCTCCCTCTCGGG  
AGACTATGGGCATAGAACGG

>2566

TGAGGGGACTAGTATGTATTTAATATTTTCATCTAATTTTTGTAGCCCTGGCCTGGCTGGAT  
GACAAAAGTGTTTAAACTAAGACCGATTTGAGCAAGTATTTTATCCTCCCTCTCGGGAG  
ACTATGGGCATAGAACGGTG

>2567

TTCATCTAATTTTTGTAGCCCTGGCCTGGCTGGATGACAAAAGTGTTTAAACTAAGACC  
GATTTGAGCAAGTATTTTATCCTCCCTCTCGGGAGACTATGGGCATAGAACGGTGTGGG  
GATTTGGAGGTGCTGGCAAGTC

>2568

AGTGTTTAAACTAAGACCGATTTGAGCAAGTATTTTATCCTCCCTCTCGGGAGACTATG  
GGCATAGAACGGTGTGGGGATTTGGAGGTGCTGGCAAGTCTGGCCCCCTTCCTCTTGC  
GTTTACTCAGGCACAGATGGAAA

>2569

TGTTTAAACTAAGACCGATTTGAGCAAGTATTTTATCCTCCCTCTCGGGAGACTATGGG  
CATAGAACGGTGTGGGGATTTGGAGGTGCTGGCAAGTCTGGCCCCCTTCCTCTTGC  
TTACTCAGGCACAGATGGAAAA

>2570

CGGGAGACTATGGGCATAGAACGGTGTGGGGATTTGGAGGTGCTGGCAAGTCTGGCCC  
CTTTCCTCTTGC GTTTACTCAGGCACAGATGGAAAAAGATGAACTCAATGAGGACCC



TTTTGTGAGATGCGGCACATTTTCG

>2571

TCTGGCCCCCTTTCTCTTGCGTTTACTCAGGCACAGATGGAAAAAGATGAAACTCAAT  
GAGGACCCTTTTGTGAGATGCGGCACATTTTCGCTTTGTGGAATTATTAACCTTTTATAAG  
ACTGGGATACTTACAAACTTAC

>2572

ACTCAGGCACAGATGGAAAAAGATGAAACTCAATGAGGACCCTTTTGTGAGATGCGG  
CACATTTTCGCTTTGTGGAATTATTAACCTTTTATAAGACTGGGATACTTACAAACTTACC  
GCAGGACCAGACAGTGACTATCA

>2573

ATTTTCGCTTTGTGGAATTATTAACCTTTTATAAGACTGGGATACTTACAAACTTACCGCA  
GGACCAGACAGTGACTATCAGAATCCTCTCTTCTAAAGATCAGCGATCTACAGCTTTTCG  
CAAAACTTAAGGCTGACTTGG

>2574

TCTTCTAAAGATCAGCGATCTACAGCTTTCGCAAACTTAAGGCTGACTTGGAATCTA  
GACAGCCCCTAGTATGGTGAGTGACCCTAGAGTGGTTTTTAATGAGGAGATACTCACG  
GGAGCCAGCATCTCGGGGGTCCC

>2575

TAAAGATCAGCGATCTACAGCTTTCGCAAACTTAAGGCTGACTTGGAATCTAGACA  
GCCCCTAGTATGGTGAGTGACCCTAGAGTGGTTTTTAATGAGGAGATACTCACGGGAG  
CCAGCATCTCGGGGGTCCCCGGGG

>2576

GATCAGCGATCTACAGCTTTCGCAAACTTAAGGCTGACTTGGAATCTAGACAGCCC  
CTAGTATGGTGAGTGACCCTAGAGTGGTTTTTAATGAGGAGATACTCACGGGAGCCAG  
CATCTCGGGGGTCCCCGGGGGGTT

>2577

TACAGCTTTCGCAAACTTAAGGCTGACTTGGAATCTAGACAGCCCCTAGTATGGTG  
AGTGACCCTAGAGTGGTTTTTAATGAGGAGATACTCACGGGAGCCAGCATCTCGGGGG  
TCCCCGGGGGGTTCATGGCCAGGA

>2578

CCCTAGTATGGTGAGTGACCCTAGAGTGGTTTTTAATGAGGAGATACTCACGGGAGCC  
AGCATCTCGGGGGTCCCCGGGGGGTTCATGGCCAGGAGCGTTGCAAGCTGGTTTGTTT  
GTTTGTTTGTTTGAGACAGGGTC

>2579

TGAGTGACCCTAGAGTGGTTTTTAATGAGGAGATACTCACGGGAGCCAGCATCTCGGG  
GGTCCCCGGGGGGTTCATGGCCAGGAGCGTTGCAAGCTGGTTTGTTTGTTTGTTTGTTT  
TGAGACAGGGTCTTACTCTGTTG

>2580

GGTTTTTAATGAGGAGATACTCACGGGAGCCAGCATCTCGGGGGTCCCCGGGGGGTTC  
ATGGCCAGGAGCGTTGCAAGCTGGTTTGTTTGTTTGTTTGTTTGAGACAGGGTCTTAC  
TCTGTTGCTCAGGCTGGAGTGCA

>2581

CTCACGGGAGCCAGCATCTCGGGGGTCCCCGGGGGGTTCATGGCCAGGAGCGTTGCA  
AGCTGGTTTGTTTGTTTGTTTGTTTGAGACAGGGTCTTACTCTGTTGCTCAGGCTGGA

GTGCAGTGGCATAATCTCGGCTCA

>2582

GGGGTCCCCGGGGGGTTCATGGCCAGGAGCGTTGCAAGCTGGTTTGTGTTTGTGTTG  
TTTTGAGACAGGGTCTTACTCTGTTGCTCAGGCTGGAGTGCAGTGGCATAATCTCGGCT  
CACTGCAACCTTGCTTGCTCTCC

>2583

GGGGGTTCATGGCCAGGAGCGTTGCAAGCTGGTTTGTGTTTGTGTTTGTGTTTGTGAGACA  
GGGTCTTACTCTGTTGCTCAGGCTGGAGTGCAGTGGCATAATCTCGGCTCACTGCAAC  
CTTGCTTGCTCTCCCTGGCTCAAG

>2584

GGAGCGTTGCAAGCTGGTTTGTGTTTGTGTTTGTGTTTGTGAGACAGGGTCTTACTCTGTTG  
CTCAGGCTGGAGTGCAGTGGCATAATCTCGGCTCACTGCAACCTTGCTTGCTCTCCCTG  
GCTCAAGCAATTCTCCACATT

>2585

ATAATCTCGGCTCACTGCAACCTTGCTTGCTCTCCCTGGCTCAAGCAATTCTCCACATT  
AGCCTCCCAAGTAGCTGGGATTACAGGTGTATGCCACCACAGCCTGCTAATTTTAAAGT  
TTTTTGTAGAGATGAGGTTTC

>2586

GCAACCTTGCTTGCTCTCCCTGGCTCAAGCAATTCTCCACATTAGCCTCCCAAGTAGC  
TGGGATTACAGGTGTATGCCACCACAGCCTGCTAATTTTAAAGTTTTTGTAGAGATGA  
GGTTTCACTGCATTGCCTAGGC

>2587

AACCTTGCTTGCTCTCCCTGGCTCAAGCAATTCTCCACATTAGCCTCCCAAGTAGCTG  
GGATTACAGGTGTATGCCACCACAGCCTGCTAATTTTAAAGTTTTTGTAGAGATGAGG  
TTTCACTGCATTGCCTAGGCTG

>2588

ATTCTCCACATTAGCCTCCCAAGTAGCTGGGATTACAGGTGTATGCCACCACAGCCTG  
CTAATTTTAAAGTTTTTGTAGAGATGAGGTTTCACTGCATTGCCTAGGCTGATCTTGAA  
CTCCTGGGCTCAAACAATCTT

>2589

TAGAGATGAGGTTTCACTGCATTGCCTAGGCTGATCTTGAACTCCTGGGCTCAAACAAT  
CTTCCCTCCTTGTCCTCTTAAAGTGCTGGGATTACAGGTGTGAGCCACAGCGCGAGGC  
CTTGTTTGGTGTTTTTGTGTTGTT

>2590

TTTCACTGCATTGCCTAGGCTGATCTTGAACTCCTGGGCTCAAACAATCTTCCCTCCTT  
GTCCTCTTAAAGTGCTGGGATTACAGGTGTGAGCCACAGCGCGAGGCCTTGTTTGGTG  
TTTTTGTTTGTGTTTGTGTTGTT

>2591

TAGGCTGATCTTGAACTCCTGGGCTCAAACAATCTTCCCTCCTTGTCCTCTTAAAGTGC  
TGGGATTACAGGTGTGAGCCACAGCGCGAGGCCTTGTTTGGTGTTTTTGTGTTTGTGTT  
TGTTTGTGTTTATGGATCATTAC

>2592

TCAAACAATCTTCCCTCCTTGTCCTCTTAAAGTGCTGGGATTACAGGTGTGAGCCACAG  
CGCGAGGCCTTGTTTGGTGTTTTTGTGTTTGTGTTTGTGTTTGTGTTTATGGATCATTACCTAT

AAAGTAATTTAGAATACCCA

>2593

CCTCCTTGCCTCTTAAAGTGCTGGGATTACAGGTGTGAGCCACAGCGCGAGGCCTTG  
TTTGGTGTTTTTGTTTGTGTTTGTGTTTGTGTTTATGGATCATTACCTATAAAGTAATTTAG  
AATACCCACTCATTTATGATC

>2594

CTTGTCCTCTTAAAGTGCTGGGATTACAGGTGTGAGCCACAGCGCGAGGCCTTGTTTG  
GTGTTTTTGTGTTTGTGTTTGTGTTTGTGTTTATGGATCATTACCTATAAAGTAATTTAGAATA  
CCCACTCATTTATGATCCAGC

>2595

TCCTCTTAAAGTGCTGGGATTACAGGTGTGAGCCACAGCGCGAGGCCTTGTTTGGTGT  
TTTTGTTTGTGTTTGTGTTTGTGTTTATGGATCATTACCTATAAAGTAATTTAGAATACCCA  
CTCATTTATGATCCAGCCTTC

>2596

CCACAGCGCGAGGCCTTGTTTGGTGTGTTTTGTTTGTGTTTGTGTTTGTGTTTATGGATCAT  
TACCTATAAAGTAATTTAGAATACCCACTCATTTATGATCCAGCCTTCCCTGCATTTTCTA  
GCGTTGAGGTCCTTTGGGG

>2597

GGATCATTACCTATAAAGTAATTTAGAATACCCACTCATTTATGATCCAGCCTTCCCTGCA  
TTTTCTAGCGTTGAGGTCCTTTGGGGCCATAGAAGTATGTTTTTCCAAGACTGATTGCTT  
CGTGTATTTAACCAGGTTT

>2598

TTACCTATAAAGTAATTTAGAATACCCACTCATTTATGATCCAGCCTTCCCTGCATTTTCT  
AGCGTTGAGGTCCTTTGGGGCCATAGAAGTATGTTTTTCCAAGACTGATTGCTTCGTGT  
ATTTAACCAGGTTTTTTGTG

>2599

ACCCACTCATTTATGATCCAGCCTTCCCTGCATTTTCTAGCGTTGAGGTCCTTTGGGGCC  
ATAGAAGTATGTTTTTCCAAGACTGATTGCTTCGTGTATTTAACCAGGTTTTTTGTGAAG  
GGTTTGATATAAACTGAGTG

>2600

TTCCCTGCATTTTCTAGCGTTGAGGTCCTTTGGGGCCATAGAAGTATGTTTTTCCAAGA  
CTGATTGCTTCGTGTATTTAACCAGGTTTTTTGTGAAGGGTTTGATATAAACTGAGTGAC  
TGAAGAGAGGAACATGGTGTG

>2601

TAGCGTTGAGGTCCTTTGGGGCCATAGAAGTATGTTTTTCCAAGACTGATTGCTTCGTG  
TATTTAACCAGGTTTTTTGTGAAGGGTTTGATATAAACTGAGTGACTGAAGAGAGGAA  
CATGGTGTGATTTGGTAGAAAGA

>2602

TATGTTTTTCCAAGACTGATTGCTTCGTGTATTTAACCAGGTTTTTTGTGAAGGGTTTGA  
TATAAACTGAGTGACTGAAGAGAGGAACATGGTGTGATTTGGTAGAAAGATCTGTAAT  
TTTGGAGTCAAGACTGGCCTAG

>2603

GCTTCGTGTATTTAACCAGGTTTTTTGTGAAGGGTTTGATATAAACTGAGTGACTGAAG  
AGAGGAACATGGTGTGATTTGGTAGAAAGATCTGTAATTTGGAGTCAAGACTGGCCT

AGATGGACAGCTTGGCCACTTTT

>2604

TTTTGTGAAGGGTTTGATATAAACTGAGTGACTGAAGAGAGGAACATGGTGTGATTTG  
GTAGAAAGATCTGTAATTTTGGAGTCAAGACTGGCCTAGATGGACAGCTTGGCCACTT  
TTAAAATTTTGTGTCCTTAGCCCC

>2605

GTTTGATATAAACTGAGTGACTGAAGAGAGGAACATGGTGTGATTTGGTAGAAAGATC  
TGTAATTTTGGAGTCAAGACTGGCCTAGATGGACAGCTTGGCCACTTTTAAAATTTTGT  
GTCCTTAGCCCCATAAACATTTT

>2606

TGGTAGAAAGATCTGTAATTTTGGAGTCAAGACTGGCCTAGATGGACAGCTTGGCCAC  
TTTTAAAATTTTGTGTCCTTAGCCCCATAAACATTTTGAGATTCAGTTTTCTCTCCTGTG  
AATTGGGGACGATATTGCCTAA

>2607

TGGCCTAGATGGACAGCTTGGCCACTTTTAAAATTTTGTGTCCTTAGCCCCATAAACAT  
TTTGAGATTCAGTTTTCTCTCCTGTGAATTGGGGACGATATTGCCTAACTTGTAAGGTTT  
TTGCAAAGATCAAATGAAAAA

>2608

ACAGCTTGGCCACTTTTAAAATTTTGTGTCCTTAGCCCCATAAACATTTTGAGATTCAGT  
TTTCTCTCCTGTGAATTGGGGACGATATTGCCTAACTTGTAAGGTTCTTGCAAAGATCA  
AATGAAAAAATACACATAGAT

>2609

TCCTTAGCCCCATAAACATTTTGAGATTCAGTTTTCTCTCCTGTGAATTGGGGACGATAT  
TGCCTAACTTGTAAGGTTCTTGCAAAGATCAAATGAAAAAATACACATAGATCTCCTGG  
CTATTATTGGAGTGCCCAGTA

>2610

AGCCCCATAAACATTTTGAGATTCAGTTTTCTCTCCTGTGAATTGGGGACGATATTGCCT  
AACTTGTAAGGTTCTTGCAAAGATCAAATGAAAAAATACACATAGATCTCCTGGCTATT  
ATTGGAGTGCCCAGTAAATGC

>2611

TGCCTAACTTGTAAGGTTCTTGCAAAGATCAAATGAAAAAATACACATAGATCTCCTGG  
CTATTATTGGAGTGCCCAGTAAATGCTAGTTGCCTTATCCTCCATTTTCTTTTTGAGAGC  
TGAAGACCTGATTTTATTTCC

>2612

CTTGTAAGGTTCTTGCAAAGATCAAATGAAAAAATACACATAGATCTCCTGGCTATTATT  
GGAGTGCCCAGTAAATGCTAGTTGCCTTATCCTCCATTTTCTTTTTGAGAGCTGAAGAC  
CTGATTTTATTTCCCTTGCAAT

>2613

TCTTGCAAAGATCAAATGAAAAAATACACATAGATCTCCTGGCTATTATTGGAGTGCCC  
AGTAAATGCTAGTTGCCTTATCCTCCATTTTCTTTTTGAGAGCTGAAGACCTGATTTTAT  
TTCCTTGCAATTTTTCATGTCA

>2614

GCTAGTTGCCTTATCCTCCATTTTCTTTTTGAGAGCTGAAGACCTGATTTTATTTCCCTTG  
CATTTTTTCATGTCATTGCCTATAGGGAGATACATTCATATATTTGTTGCTCATTTTTGTATG

TGTTACAGTGGTGATAAA

>2615

TTTTATTTCCTTGCATTTTTTCATGTCATTGCCTATAGGGAGATACATTTCATATATTTGTTGC  
TCATTTTTGTATGTGTTACAGTGGTGATAAAGAACTGATGGTATCCCAGATGGGGAGG  
GGCAGGTAAGGTTTTATCA

>2616

ATTTCCTTGCATTTTTTCATGTCATTGCCTATAGGGAGATACATTTCATATATTTGTTGCTCAT  
TTTTGTATGTGTTACAGTGGTGATAAAGAACTGATGGTATCCCAGATGGGGAGGGGCA  
GGTAAGGTTTTATCAGTGG

>2617

ATAGGGAGATACATTTCATATATTTGTTGCTCATTTTTGTATGTGTTACAGTGGTGATAAAG  
AACTGATGGTATCCCAGATGGGGAGGGGCAGGTAAGGTTTTATCAGTGGCTTTTAATT  
TCTTTATGAAATTGGATGTG

>2618

TGTTGCTCATTTTTGTATGTGTTACAGTGGTGATAAAGAACTGATGGTATCCCAGATGG  
GGAGGGGCAGGTAAGGTTTTATCAGTGGCTTTTAATTCTTTATGAAATTGGATGTGGC  
TCTAGGGAATAGATGTCTCTG

>2619

CTCATTTTTGTATGTGTTACAGTGGTGATAAAGAACTGATGGTATCCCAGATGGGGAG  
GGGCAGGTAAGGTTTTATCAGTGGCTTTTAATTCTTTATGAAATTGGATGTGGCTCTAG  
GGAATAGATGTCTCTGGGATG

>2620

ATGGTATCCCAGATGGGGAGGGGCAGGTAAGGTTTTATCAGTGGCTTTTAATTTCTTTAT  
GAAATTGGATGTGGCTCTAGGGAATAGATGTCTCTGGGATGGTCATGTTTTCCCTTGCC  
TTTTGGCTCCTGCAATGAGGA

>2621

GGGGCAGGTAAGGTTTTATCAGTGGCTTTTAATTTCTTTATGAAATTGGATGTGGCTCTA  
GGGAATAGATGTCTCTGGGATGGTCATGTTTTCCCTTGCCTTTTGGCTCCTGCAATGAG  
GACCTCTTTCTGTTGGTGTGG

>2622

GTTTTATCAGTGGCTTTTAATTTCTTTATGAAATTGGATGTGGCTCTAGGGAATAGATGT  
CTCTGGGATGGTCATGTTTTCCCTTGCCTTTTGGCTCCTGCAATGAGGACCTCTTTCTGT  
TGGTGTGGGTCTTGTCTGAG

>2623

GGGAATAGATGTCTCTGGGATGGTCATGTTTTCCCTTGCCTTTTGGCTCCTGCAATGAG  
GACCTCTTTCTGTTGGTGTGGGTCTTGTCTGAGCATGCCAGGGATGGCAGTGAACACA  
TCGATGGTGGTTGGGACGTCCTC

>2624

ATAGATGTCTCTGGGATGGTCATGTTTTCCCTTGCCTTTTGGCTCCTGCAATGAGGACCT  
CTTTCTGTTGGTGTGGGTCTTGTCTGAGCATGCCAGGGATGGCAGTGAACACATCGAT  
GGTGGTTGGGACGTCCTCATTC

>2625

CCTTTTGGCTCCTGCAATGAGGACCTCTTTCTGTTGGTGTGGGTCTTGTCTGAGCATGC  
CAGGGATGGCAGTGAACACATCGATGGTGGTTGGGACGTCCTCATTCAGACCTCTG

GGACATACTAATTCCCAGACCTC

>2626

AATGAGGACCTCTTTCTGTTGGTGTGGGTCTTGTCTGAGCATGCCAGGGATGGCAGTG  
AACACATCGATGGTGGTTGGGACGTCCTCATTCCCAGACCTCTGGGACATACTAATTCC  
CAGACCTCTGAAACATGGGTCTC

>2627

GAGGACCTCTTTCTGTTGGTGTGGGTCTTGTCTGAGCATGCCAGGGATGGCAGTGAAC  
ACATCGATGGTGGTTGGGACGTCCTCATTCCCAGACCTCTGGGACATACTAATTCCCAG  
ACCTCTGAAACATGGGTCTCAGC

>2628

CTTTCTGTTGGTGTGGGTCTTGTCTGAGCATGCCAGGGATGGCAGTGAACACATCGAT  
GGTGGTTGGGACGTCCTCATTCCCAGACCTCTGGGACATACTAATTCCCAGACCTCTGA  
AACATGGGTCTCAGCTGCTTTGC

>2629

CGATGGTGGTTGGGACGTCCTCATTCCCAGACCTCTGGGACATACTAATTCCCAGACCT  
CTGAAACATGGGTCTCAGCTGCTTTGCCCTGCAGACTTGTTCTCAGTAGCTATTTACCT  
TTAGGAGAAAAAAAAAATCCTT

>2630

CAGACCTCTGGGACATACTAATTCCCAGACCTCTGAAACATGGGTCTCAGCTGCTTTGC  
CCTGCAGACTTGTTCTCAGTAGCTATTTACCTTTAGGAGAAAAAAAAAATCCTTAACCA  
AATGCTTTAGGAAGGCTTTCTT

>2631

CTCAGTAGCTATTTACCTTTAGGAGAAAAAAAAAATCCTTAACCAAATGCTTTAGGAAG  
GCTTTCTTATCGTGGCTGTAAGGTGCTGGTGGGTGTTGTTGGCAGCCAAGTTTGGGTTTAA  
ATCTCACTGGGGGTTGAGGCTG

>2632

AGCTATTTACCTTTAGGAGAAAAAAAAAATCCTTAACCAAATGCTTTAGGAAGGCTTTC  
TTATCGTGGCTGTAAGGTGCTGGTGGGTGTTGTTGGCAGCCAAGTTTGGGTTTAAATCTCA  
CTGGGGGTTGAGGCTGCTGAAC

>2633

TTTACCTTTAGGAGAAAAAAAAAATCCTTAACCAAATGCTTTAGGAAGGCTTTCTTATC  
GTGGCTGTAAGGTGCTGGTGGGTGTTGTTGGCAGCCAAGTTTGGGTTTAAATCTCACTGG  
GGGTTGAGGCTGCTGAACTGCTA

>2634

TTTAGGAGAAAAAAAAAATCCTTAACCAAATGCTTTAGGAAGGCTTTCTTATCGTGGCT  
GTAAGGTGCTGGTGGGTGTTGTTGGCAGCCAAGTTTGGGTTTAAATCTCACTGGGGGTTG  
AGGCTGCTGAACTGCTATTCCTA

>2635

GGAGAAAAAAAAAATCCTTAACCAAATGCTTTAGGAAGGCTTTCTTATCGTGGCTGTA  
AGGTGCTGGTGGGTGTTGTTGGCAGCCAAGTTTGGGTTTAAATCTCACTGGGGGTTGAGG  
CTGCTGAACTGCTATTCCTAACAT

>2636

CCTTAACCAAATGCTTTAGGAAGGCTTTCTTATCGTGGCTGTAAGGTGCTGGTGGGTTG  
TTGGCAGCCAAGTTTGGGTTTAAATCTCACTGGGGGTTGAGGCTGCTGAACTGCTATTC

CTAACATGCTCTTGTGTTTTTA

>2637

CTTTCCTTATCGTGGCTGTAAGGTGCTGGTGGGTTGTTGGCAGCCAAGTTTGGGTTTAAA  
TCTCACTGGGGGTTGAGGCTGCTGAACTGCTATTCCTAACATGCTCTTGTGTTTTTATGC  
ATAGACCGTCTTCTGGATCCT

>2638

GGCAGCCAAGTTTGGGTTTAAATCTCACTGGGGGTTGAGGCTGCTGAACTGCTATTCCT  
AACATGCTCTTGTGTTTTTATGCATAGACCGTCTTCTGGATCCTTGGTGAGTTTTTTTTTA  
CTCTGGGGTTTTTCAGGAGAAA

>2639

CAGCCAAGTTTGGGTTTAAATCTCACTGGGGGTTGAGGCTGCTGAACTGCTATTCCTAA  
CATGCTCTTGTGTTTTTATGCATAGACCGTCTTCTGGATCCTTGGTGAGTTTTTTTTTACTC  
TGGGGTTTTTCAGGAGAAAGG

>2640

TGAGGCTGCTGAACTGCTATTCCTAACATGCTCTTGTGTTTTTATGCATAGACCGTCTTC  
TGGATCCTTGGTGAGTTTTTTTTTACTCTGGGGTTTTTCAGGAGAAAGGTTTGTCAATCAT  
CATCACTCTTCTCCTTCATCA

>2641

GCTGCTGAACTGCTATTCCTAACATGCTCTTGTGTTTTTATGCATAGACCGTCTTCTGGA  
TCCTTGGTGAGTTTTTTTTTACTCTGGGGTTTTTCAGGAGAAAGGTTTGTCAATCATCATCA  
CTCTTCTCCTTCATCACAGC

>2642

CCTAACATGCTCTTGTGTTTTTATGCATAGACCGTCTTCTGGATCCTTGGTGAGTTTTTT  
TACTCTGGGGTTTTTCAGGAGAAAGGTTTGTCAATCATCACTCTTCTCCTTCATCAC  
AGCAGTGGTAACAGTGGTTA

>2643

TGTTTTTATGCATAGACCGTCTTCTGGATCCTTGGTGAGTTTTTTTTTACTCTGGGGTTTT  
CAGGAGAAAGGTTTGTCAATCATCACTCTTCTCCTTCATCACAGCAGTGGTAACAG  
TGGTTAGAGGGAGGAGGTAGA

>2644

TTTTTTTTTACTCTGGGGTTTTTCAGGAGAAAGGTTTGTCAATCATCACTCTTCTCCTT  
CATCACAGCAGTGGTAACAGTGGTTAGAGGGAGGAGGTAGAATCAGTTGTTCAAGTTC  
TTTTTTCTTCCAGGTAAGTCCC

>2645

TTTTTACTCTGGGGTTTTTCAGGAGAAAGGTTTGTCAATCATCACTCTTCTCCTTCAT  
CACAGCAGTGGTAACAGTGGTTAGAGGGAGGAGGTAGAATCAGTTGTTCAAGTTCTTT  
TTTCTTCCAGGTAAGTCCCCC

>2646

GAAAGGTTTGTCAATCATCACTCTTCTCCTTCATCACAGCAGTGGTAACAGTGGTT  
AGAGGGAGGAGGTAGAATCAGTTGTTCAAGTTCTTTTTTCTTCCAGGTAAGTCCCCC  
CACCCCCCGGCTGCCCTGCCCT

>2647

CATCACTCTTCTCCTTCATCACAGCAGTGGTAACAGTGGTTAGAGGGAGGAGGTAGAA  
TCAGTTGTTCAAGTTCTTTTTTCTTCCAGGTAAGTCCCCCCCCACCCCCCGGCTGCCCT

GCCCTTCCGCATTTTCTGGGAAG

>2648

ATCACAGCAGTGGTAACAGTGGTTAGAGGGAGGAGGTAGAATCAGTTGTTCAAGTTCT  
TTTTTCTTCCAGGTAAGTCCCCCCCCACCCCCCGGCTGCCCCTGCCCTTCCGCATTTTCT  
GGGAAGTGAATCTATTGGGAAAT

>2649

CAGCAGTGGTAACAGTGGTTAGAGGGAGGAGGTAGAATCAGTTGTTCAAGTTCTTTTT  
TCTTCCAGGTAAGTCCCCCCCCACCCCCCGGCTGCCCCTGCCCTTCCGCATTTTCTGGGA  
AGTGAATCTATTGGGAAATGCAT

>2650

AGTTCTTTTTTCTTCCAGGTAAGTCCCCCCCCACCCCCCGGCTGCCCCTGCCCTTCCGCA  
TTTTCTGGGAAGTGAATCTATTGGGAAATGCATGGGCCTGTGTTTCTGGGATGATTTA  
GCATATGTAGTAAGAGGGGTGC

>2651

CCCACCCCCCGGCTGCCCCTGCCCTTCCGCATTTTCTGGGAAGTGAATCTATTGGGAAA  
TGCATGGGCCTGTGTTTCTGGGATGATTTTAGCATATGTAGTAAGAGGGGTGCTTTTTGC  
TGATAGCCCAGGCGTTGGTCC

>2652

CCGCATTTTCTGGGAAGTGAATCTATTGGGAAATGCATGGGCCTGTGTTTCTGGGATGA  
TTTTAGCATATGTAGTAAGAGGGGTGCTTTTTGCTGATAGCCCAGGCGTTGGTCCTGTA  
ATCCTGAGGTGTGGTTTAATAA

>2653

CATTTTCTGGGAAGTGAATCTATTGGGAAATGCATGGGCCTGTGTTTCTGGGATGATTTT  
AGCATATGTAGTAAGAGGGGTGCTTTTTGCTGATAGCCCAGGCGTTGGTCCTGTAATCC  
TGAGGTGTGGTTTAATAAGAG

>2654

GGAAGTGAATCTATTGGGAAATGCATGGGCCTGTGTTTCTGGGATGATTTTAGCATATGT  
AGTAAGAGGGGTGCTTTTTGCTGATAGCCCAGGCGTTGGTCCTGTAATCCTGAGGTGT  
GGTTTAATAAGAGCTGAACAGT

>2655

ATGGGCCTGTGTTTCTGGGATGATTTTAGCATATGTAGTAAGAGGGGTGCTTTTTGCTGA  
TAGCCCAGGCGTTGGTCCTGTAATCCTGAGGTGTGGTTTAATAAGAGCTGAACAGTCAT  
TTAATTATTTATTGGGTGCCT

>2656

ATTTTAGCATATGTAGTAAGAGGGGTGCTTTTTGCTGATAGCCCAGGCGTTGGTCCTGT  
AATCCTGAGGTGTGGTTTAATAAGAGCTGAACAGTCATTTAATTATTTATTGGGTGCCTG  
GAGAATTTTATAGGCAGGAGA

>2657

TTAGCATATGTAGTAAGAGGGGTGCTTTTTGCTGATAGCCCAGGCGTTGGTCCTGTAAT  
CCTGAGGTGTGGTTTAATAAGAGCTGAACAGTCATTTAATTATTTATTGGGTGCCTGGA  
GAATTTTATAGGCAGGAGAGCC

>2658

GGGTGCTTTTTGCTGATAGCCCAGGCGTTGGTCCTGTAATCCTGAGGTGTGGTTTAATA  
AGAGCTGAACAGTCATTTAATTATTTATTGGGTGCCTGGAGAATTTTATAGGCAGGAGA



GCCTAGAGCTATTCCAGAAAAA

>2659

CCAGGCGTTGGTCCTGTAATCCTGAGGTGTGGTTTAATAAGAGCTGAACAGTCATTTAA  
TTATTTATTGGGTGCCTGGAGAATTTTATAGGCAGGAGAGCCTAGAGCTATTCCAGAAA  
AAAGGCCAATCCTAGAGCTTTT

>2660

TGCCTGGAGAATTTTATAGGCAGGAGAGCCTAGAGCTATTCCAGAAAAAAGGCCAATC  
CTAGAGCTTTTTGTGTGGCTTTCTTCTTGGGCTTGAAGTTTTTGATGCTCGCCAACATTC  
ATAGTAGCCCCCAATGCCACCC

>2661

CCTGGAGAATTTTATAGGCAGGAGAGCCTAGAGCTATTCCAGAAAAAAGGCCAATCCT  
AGAGCTTTTTGTGTGGCTTTCTTCTTGGGCTTGAAGTTTTTGATGCTCGCCAACATTCAT  
AGTAGCCCCCAATGCCACCCAC

>2662

GAGCCTAGAGCTATTCCAGAAAAAAGGCCAATCCTAGAGCTTTTTGTGTGGCTTTCTTC  
TTGGGCTTGAAGTTTTTGATGCTCGCCAACATTCATAGTAGCCCCCAATGCCACCCACA  
CATTGGGAAGGGACAATAGAGC

>2663

GCCAATCCTAGAGCTTTTTGTGTGGCTTTCTTCTTGGGCTTGAAGTTTTTGATGCTCGCC  
AACATTCATAGTAGCCCCCAATGCCACCCACACATTGGGAAGGGACAATAGAGCCAGC  
TAAAGCTCTTTCTTTGTGTGTG

>2664

ATTCATAGTAGCCCCCAATGCCACCCACACATTGGGAAGGGACAATAGAGCCAGCTAA  
AGCTCTTTCTTTGTGTGTGCCCATATTAACCCATCTAGTCAAATGTGGGTACCCTTCCAA  
ACCATTATGTCTTGTTCTCTC

>2665

TCATAGTAGCCCCCAATGCCACCCACACATTGGGAAGGGACAATAGAGCCAGCTAAAG  
CTCTTTCTTTGTGTGTGCCCATATTAACCCATCTAGTCAAATGTGGGTACCCTTCCAAAC  
CATTATGTCTTGTTCTCTCGG

>2666

CACACATTGGGAAGGGACAATAGAGCCAGCTAAAGCTCTTTCTTTGTGTGTGCCCATAT  
TAACCCATCTAGTCAAATGTGGGTACCCTTCCAAACCATTATGTCTTGTTCTCTCGGCT  
GCTGGGAACATTAAAAGAACC

>2667

TGGGAAGGGACAATAGAGCCAGCTAAAGCTCTTTCTTTGTGTGTGCCCATATTAACCCA  
TCTAGTCAAATGTGGGTACCCTTCCAAACCATTATGTCTTGTTCTCTCGGCTGCTGGG  
AACATTAAAAGAACCTTATTG

>2668

AAAGCTCTTTCTTTGTGTGTGCCCATATTAACCCATCTAGTCAAATGTGGGTACCCTTCC  
AAACCATTATGTCTTGTTCTCTCGGCTGCTGGGAACATTAAAAGAACCCTTATTTGAAG  
GCAAACATTACTGTATCAGTG

>2669

AACCATTATGTCTTGTTCTCTCGGCTGCTGGGAACATTAAAAGAACCCTTATTTGAAGG  
CAAACATTACTGTATCAGTGATGCTGAACTGGAGGTCTGTCAATGGCACTTCATTGCA

TTGATAATTGTTTCTGCTTTGA

>2670

TATGTCTTGTTCCCTCTCGGCTGCTGGGAACATTAAAAGAACCTTATTTGAAGGCAAACA  
T TACTGTATCAGTGATGCTGAAACTGGAGGTCTGTCAATGGCACTTCATTGCATTGATAA  
TTGTTTCTGCTTTGAACCACA

>2671

GCTGCTGGGAACATTAAAAGAACCTTATTTGAAGGCAAACATTACTGTATCAGTGATGC  
TGAAACTGGAGGTCTGTCAATGGCACTTCATTGCATTGATAATTGTTTCTGCTTTGAAC  
CACAACACTGTGATTATTGAGG

>2672

CTGGGAACATTAAAAGAACCTTATTTGAAGGCAAACATTACTGTATCAGTGATGCTGAA  
ACTGGAGGTCTGTCAATGGCACTTCATTGCATTGATAATTGTTTCTGCTTTGAACCACA  
ACACTGTGATTATTGAGGTTCG

>2673

GGCAAACATTACTGTATCAGTGATGCTGAAACTGGAGGTCTGTCAATGGCACTTCATTG  
CATTGATAATTGTTTCTGCTTTGAACCACAACACTGTGATTATTGAGGTTCGACTGTAAG  
GGCTGAGGGAGCCTTGAGGCC

>2674

GCTGAAACTGGAGGTCTGTCAATGGCACTTCATTGCATTGATAATTGTTTCTGCTTTGA  
ACCACAACACTGTGATTATTGAGGTTCGACTGTAAGGGCTGAGGGAGCCTTGAGGCCA  
TTGAAAGCATTCTCCTGCCTTTA

>2675

GGTCTGTCAATGGCACTTCATTGCATTGATAATTGTTTCTGCTTTGAACCACAACACTGT  
GATTATTGAGGTTCGACTGTAAGGGCTGAGGGAGCCTTGAGGCCATTGAAAGCATTCT  
CCTGCCTTTAGGCCAGGCCTAT

>2676

AATGGCACTTCATTGCATTGATAATTGTTTCTGCTTTGAACCACAACACTGTGATTATTG  
AGGTTTCGACTGTAAGGGCTGAGGGAGCCTTGAGGCCATTGAAAGCATTCTCCTGCCTT  
TAGGCCAGGCCTATGTTATAAG

>2677

GTTTCGACTGTAAGGGCTGAGGGAGCCTTGAGGCCATTGAAAGCATTCTCCTGCCTTTA  
GGCCAGGCCTATGTTATAAGTGAGAGACAGGTGTGGAGTGTGCAGGGAGGGAATTAA  
GATAGATGGTGACCTGGAATTCAGA

>2678

TGTAAGGGCTGAGGGAGCCTTGAGGCCATTGAAAGCATTCTCCTGCCTTTAGGCCAGG  
CCTATGTTATAAGTGAGAGACAGGTGTGGAGTGTGCAGGGAGGGAATTAAGATAGATG  
GTGACCTGGAATTCAGAAGGTGGA

>2679

CTTTAGGCCAGGCCTATGTTATAAGTGAGAGACAGGTGTGGAGTGTGCAGGGAGGGAA  
TTAAGATAGATGGTGACCTGGAATTCAGAAGGTGGACCCCCACCACCCCCAGCCTGA  
GACCAAAGCACAGTTTAACTCTGT

>2680

TATAAGTGAGAGACAGGTGTGGAGTGTGCAGGGAGGGAATTAAGATAGATGGTGACCT  
GGAATTCAGAAGGTGGACCCCCACCACCCCCAGCCTGAGACCAAAGCACAGTTTAA

CTCTGTCATGGGTCATGTGCAGAGG

>2681

TTAAGATAGATGGTGACCTGGAATTCAGAAGGTGGACCCCCACCACCCCCAGCCTGA  
GACCAAAGCACAGTTTAACTCTGTCATGGGTCATGTGCAGAGGGAAGGGACTGCCCC  
AGAATTAGCAGTTGGTTGAACACCC

>2682

TGGTGACCTGGAATTCAGAAGGTGGACCCCCACCACCCCCAGCCTGAGACCAAAGC  
ACAGTTTAACTCTGTCATGGGTCATGTGCAGAGGGAAGGGACTGCCCCAGAATTAGCA  
GTTGGTTGAACACCCTGCTTAAAAA

>2683

TGAGACCAAAGCACAGTTTAACTCTGTCATGGGTCATGTGCAGAGGGAAGGGACTGC  
CCCAGAATTAGCAGTTGGTTGAACACCCTGCTTAAAAACTTTTTCTTTTCCTTTTTTGT  
GAGTACCGGTCCGCTTGGACTAA

>2684

ACCAAAGCACAGTTTAACTCTGTCATGGGTCATGTGCAGAGGGAAGGGACTGCCCCA  
GAATTAGCAGTTGGTTGAACACCCTGCTTAAAAACTTTTTCTTTTCCTTTTTTGTGAGT  
ACCGGTCCGCTTGGACTAAAGAA

>2685

GGGACTGCCCCAGAATTAGCAGTTGGTTGAACACCCTGCTTAAAAACTTTTTCTTTTCC  
TTTTTTGTGAGTACCGGTCCGCTTGGACTAAAGAAGTTTTGGTCGTTGTTTTCTTAATT  
TTGGGCTACAGAGTCTCTACC

>2686

GCCCCAGAATTAGCAGTTGGTTGAACACCCTGCTTAAAAACTTTTTCTTTTCCTTTTTT  
GTGAGTACCGGTCCGCTTGGACTAAAGAAGTTTTGGTCGTTGTTTTCTTAATTTGGGC  
TACAGAGTCTCTACCTACATT

>2687

GTTGAACACCCTGCTTAAAAACTTTTTCTTTTCCTTTTTTTGTGAGTACCGGTCCGCTTG  
GACTAAAGAAGTTTTGGTCGTTGTTTTCTTAATTTGGGCTACAGAGTCTCTACCTACAT  
TTGTGTTTTGTGTTTTGGTA

>2688

TTTTTGTGAGTACCGGTCCGCTTGGACTAAAGAAGTTTTGGTCGTTGTTTTCTTAATTT  
GGGCTACAGAGTCTCTACCTACATTTGTGTTTTGTGTTTTGGTAACCACATGTAACAGC  
CGGTGGAATCTTTTTTCTCTT

>2689

TCCGCTTGGACTAAAGAAGTTTTGGTCGTTGTTTTCTTAATTTTGGGCTACAGAGTCTC  
TACCTACATTTGTGTTTTGTGTTTTGGTAACCACATGTAACAGCCGGTGGAATCTTTTTT  
CTCTTTGCTTTCTCTGAACTT

>2690

GGACTAAAGAAGTTTTGGTCGTTGTTTTCTTAATTTTGGGCTACAGAGTCTCTACCTAC  
ATTTGTGTTTTGTGTTTTGGTAACCACATGTAACAGCCGGTGGAATCTTTTTTCTCTTTG  
CTTTCTCTGAACTTTCCAAAG

>2691

CTTAATTTTGGGCTACAGAGTCTCTACCTACATTTGTGTTTTGTGTTTTGGTAACCACAT  
GTAACAGCCGGTGGAATCTTTTTTCTCTTTGCTTTCTCTGAACTTTCCAAAGAGTAGGC

CCCTATCTCTCGGGGGATTAA

>2692

TGTTTTGGTAACCACATGTAACAGCCGGTGGAATCTTTTTTCTCTTTGCTTTCTCTGAAC  
TTTCCAAAGAGTAGGCCCCCTATCTCTCGGGGGATTAACTCCTCGTGGCCCCTGGGTCTG  
TGGTGCTCCCCCACCCTGTGT

>2693

TCTTTTTTCTCTTTGCTTTCTCTGAACTTTCCAAAGAGTAGGCCCCCTATCTCTCGGGGGGA  
TTAACTCCTCGTGGCCCCTGGGTCTGTTGGTGCTCCCCCACCCTGTGTCAGCATCTAAAC  
CTCTGCACACAGGATGTTTTTC

>2694

TTTGCTTTCTCTGAACTTTCCAAAGAGTAGGCCCCCTATCTCTCGGGGGATTAACTCCTC  
GTGGCCCCTGGGTCTGTTGGTGCTCCCCCACCCTGTGTCAGCATCTAAACCTCTGCACA  
CAGGATGTTTTCTCTAGCGCTTA

>2695

AAGAGTAGGCCCCCTATCTCTCGGGGGATTAACTCCTCGTGGCCCCTGGGTCTGTTGGTGC  
TCCCCCACCCTGTGTCAGCATCTAAACCTCTGCACACAGGATGTTTTCTCTAGCGCTTA  
TCAGATGCTTTAGAAGATGCGG

>2696

CTCCTCGTGGCCCCTGGGTCTGTTGGTGCTCCCCCACCCTGTGTCAGCATCTAAACCTCT  
GCACACAGGATGTTTTCTCTAGCGCTTATCAGATGCTTTAGAAGATGCGGGGTGGAGAT  
AGAGGTAACGTTTAACCCATCC

>2697

TGTCAGCATCTAAACCTCTGCACACAGGATGTTTTCTCTAGCGCTTATCAGATGCTTTAG  
AAGATGCGGGGTGGAGATAGAGGTAACGTTTAACCCATCCTGGATTCCCTTTCATGAACT  
CAGCCACAGAGCAGAGGGAGG

>2698

AACCTCTGCACACAGGATGTTTTCTCTAGCGCTTATCAGATGCTTTAGAAGATGCGGGG  
TGGAGATAGAGGTAACGTTTAACCCATCCTGGATTCCCTTTCATGAACTCAGCCACAGAG  
CAGAGGGAGGCTTGGCTGGAGC

>2699

CTGCACACAGGATGTTTTCTCTAGCGCTTATCAGATGCTTTAGAAGATGCGGGGTGGAG  
ATAGAGGTAACGTTTAACCCATCCTGGATTCCCTTTCATGAACTCAGCCACAGAGCAGAG  
GGAGGCTTGGCTGGAGCAAACA

>2700

TTAACCCATCCTGGATTCCCTTTCATGAACTCAGCCACAGAGCAGAGGGAGGCTTGGCT  
GGAGCAAACAATGTTGGGCCTTCTATTTCAAACAGAGGTGTGGGGGCTTGTGGTGGCA  
TCAGTGGTGCACTGAACAACCCTC

>2701

GAACTCAGCCACAGAGCAGAGGGAGGCTTGGCTGGAGCAAACAATGTTGGGCCTTCT  
ATTTCAAACAGAGGTGTGGGGGCTTGTGGTGGCATCAGTGGTGCACTGAACAACCCTC  
CCTGACCCTAGCGTGTGGGTTTGGA

>2702

AGAGCAGAGGGAGGCTTGGCTGGAGCAAACAATGTTGGGCCTTCTATTTCAAACAGA  
GGTGTGGGGGCTTGTGGTGGCATCAGTGGTGCACTGAACAACCCTCCCTGACCCTAGC

GTGTGGGTTTGGAGCCTGGGGAATC

>2703

GCAGAGGGAGGCTTGGCTGGAGCAAACAATGTTGGGCCTTCTATTTCAAACAGAGGT  
GTGGGGGCTTGTGGTGGCATCAGTGGTGCCTGAACAACCCTCCCTGACCCTAGCGTG  
TGGGTTTGGAGCCTGGGGAATCAAA

>2704

GGCTTGGCTGGAGCAAACAATGTTGGGCCTTCTATTTCAAACAGAGGTGTGGGGGCTT  
GTGGTGGCATCAGTGGTGCCTGAACAACCCTCCCTGACCCTAGCGTGTGGGTTTGGGA  
GCCTGGGGAATCAAAGAGAAATCT

>2705

ATTTCAAACAGAGGTGTGGGGGCTTGTGGTGGCATCAGTGGTGCCTGAACAACCCTC  
CCTGACCCTAGCGTGTGGGTTTGGAGCCTGGGGAATCAAAGAGAAATCTAACAACTA  
TTCTTTTTCACGTGTGGGCTGAAT

>2706

CCCTGACCCTAGCGTGTGGGTTTGGAGCCTGGGGAATCAAAGAGAAATCTAACAACT  
ATTCTTTTTCACGTGTGGGCTGAATGAATGTGTGGGTTATCCACATCAGTTTCTTCTCTC  
TTCTCATCCTCCCTCCTTCCTC

>2707

CTGACCCTAGCGTGTGGGTTTGGAGCCTGGGGAATCAAAGAGAAATCTAACAACTAT  
TCTTTTTCACGTGTGGGCTGAATGAATGTGTGGGTTATCCACATCAGTTTCTTCTCTCTT  
CTCATCCTCCCTCCTTCCTCGC

>2708

GGGTTTGGAGCCTGGGGAATCAAAGAGAAATCTAACAACTATTCTTTTTCACGTGTG  
GGCTGAATGAATGTGTGGGTTATCCACATCAGTTTCTTCTCTTCTCATCCTCCCTCCT  
TCCTCGCAGACCAGCATTTTGG

>2709

GTTTGGAGCCTGGGGAATCAAAGAGAAATCTAACAACTATTCTTTTTCACGTGTGGG  
CTGAATGAATGTGTGGGTTATCCACATCAGTTTCTTCTCTTCTCATCCTCCCTCCTTC  
CTCGCAGACCAGCATTTTGGCC

>2710

GGAGCCTGGGGAATCAAAGAGAAATCTAACAACTATTCTTTTTCACGTGTGGGCTGA  
ATGAATGTGTGGGTTATCCACATCAGTTTCTTCTCTTCTCATCCTCCCTCCTTCCTCG  
CAGACCAGCATTTTGGCCAGGG

>2711

TCAAAGAGAAATCTAACAACTATTCTTTTTCACGTGTGGGCTGAATGAATGTGTGGGT  
TATCCACATCAGTTTCTTCTCTTCTCATCCTCCCTCCTTCCTCGCAGACCAGCATTTT  
GGCCAGGGTGCCAGTTTGAG

>2712

GGTTATCCACATCAGTTTCTTCTCTTCTCATCCTCCCTCCTTCCTCGCAGACCAGCAT  
TTTGGCCAGGGTGCCAGTTTGAGCTCATTACCAAAGGTGAATAGGGAAGGGAGTAG  
AAACCAAATTAGGCACCTGTCT

>2713

CACATCAGTTTCTTCTCTTCTCATCCTCCCTCCTTCCTCGCAGACCAGCATTTTGGCC  
AGGGTGCCAGTTTGAGCTCATTACCAAAGGTGAATAGGGAAGGGAGTAGAAACCA

AATTAGGCACCTGTCTGACAACA

>2714

CTCATCCTCCCTCCTTCCTCGCAGACCAGCATTTTGGCCAGGGTGCCCAGTTTGAGCTC  
ATTTACCAAAGGTGAATAGGGAAGGGAGTAGAAACCAAATTAGGCACCTGTCTGACAA  
CACAAGGATCTTTTCTACAATGG

>2715

CAGGGTGCCCAGTTTGAGCTCATTTACCAAAGGTGAATAGGGAAGGGAGTAGAAACC  
AAATTAGGCACCTGTCTGACAACACAAGGATCTTTTCTACAATGGTGCAATTTGGATTAT  
GCAGAGTTTTAGATTTTCTGTTTT

>2716

GGTGAATAGGGAAGGGAGTAGAAACCAAATTAGGCACCTGTCTGACAACACAAGGAT  
CTTTTCTACAATGGTGCAATTTGGATTATGCAGAGTTTTAGATTTTCTGTTTTATCCCAGG  
GTGAACGTGTGTAGAAAACCTGGG

>2717

GAAACCAAATTAGGCACCTGTCTGACAACACAAGGATCTTTTCTACAATGGTGCAATTTG  
GATTATGCAGAGTTTTAGATTTTCTGTTTTATCCCAGGGTGAACGTGTGTAGAAAACCTG  
GGACCTAACCATGTTCTTCTCT

>2718

CACCTGTCTGACAACACAAGGATCTTTTCTACAATGGTGCAATTTGGATTATGCAGAGTT  
TTAGATTTTCTGTTTTATCCCAGGGTGAACGTGTGTAGAAAACCTGGGACCTAACCATGT  
TCTTCTCTTCAGTCTTATGGTC

>2719

GGATCTTTTCTACAATGGTGCAATTTGGATTATGCAGAGTTTTAGATTTTCTGTTTTATCCC  
AGGGTGAACGTGTGTAGAAAACCTGGGACCTAACCATGTTCTTCTCTTCAGTCTTATGGT  
CATTGCTACTTTGAAGGCAG

>2720

ATTATGCAGAGTTTTAGATTTTCTGTTTTATCCCAGGGTGAACGTGTGTAGAAAACCTGG  
GACCTAACCATGTTCTTCTCTTCAGTCTTATGGTCATTGCTACTTTGAAGGCAGAAAGG  
ATAAAAGTAGCATAGGGAGTGG

>2721

TTAGATTTTCTGTTTTATCCCAGGGTGAACGTGTGTAGAAAACCTGGGACCTAACCATGT  
TCTTCTCTTCAGTCTTATGGTCATTGCTACTTTGAAGGCAGAAAGGATAAAAGTAGCAT  
AGGGAGTGGTTTACCATAACTG

>2722

ACTGGGACCTAACCATGTTCTTCTCTTCAGTCTTATGGTCATTGCTACTTTGAAGGCAG  
AAAGGATAAAAGTAGCATAGGGAGTGGTTTACCATAACTGCAAGTAAATACCAAGCAT  
GTGCGAGCCTGTAGACATTGCCT

>2723

CCATGTTCTTCTCTTCAGTCTTATGGTCATTGCTACTTTGAAGGCAGAAAGGATAAAAG  
TAGCATAGGGAGTGGTTTACCATAACTGCAAGTAAATACCAAGCATGTGCGAGCCTGTA  
GACATTGCCTGCTATTGGGGAA

>2724

TTATGGTCATTGCTACTTTGAAGGCAGAAAGGATAAAAGTAGCATAGGGAGTGGTTTAC  
CATAACTGCAAGTAAATACCAAGCATGTGCGAGCCTGTAGACATTGCCTGCTATTGGGG

AAAGACGGAGTTAGCTGGGGAA

>2725

AGAAAGGATAAAAGTAGCATAGGGAGTGGTTTACCATAACTGCAAGTAAATACCAAGC  
ATGTGCGAGCCTGTAGACATTGCCTGCTATTGGGGAAAGACGGAGTTAGCTGGGGAAA  
TACATCAGTCTTCACTCCCAGCAC

>2726

ACCATAACTGCAAGTAAATACCAAGCATGTGCGAGCCTGTAGACATTGCCTGCTATTGG  
GGAAAGACGGAGTTAGCTGGGGAAATACATCAGTCTTCACTCCCAGCACCCAAGATGT  
AAACATTTCTTACTCTTCCTGGA

>2727

CAAGCATGTGCGAGCCTGTAGACATTGCCTGCTATTGGGGAAAGACGGAGTTAGCTGG  
GGAAATACATCAGTCTTCACTCCCAGCACCCAAGATGTAAACATTTCTTACTCTTCCTG  
GATCAGGCTATCTCTGCTTTGCC

>2728

TTGCCTGCTATTGGGGAAAGACGGAGTTAGCTGGGGAAATACATCAGTCTTCACTCCC  
AGCACCCAAGATGTAAACATTTCTTACTCTTCCTGGATCAGGCTATCTCTGCTTTGCCTT  
TTCTTTCACCTACCTCCTTCTT

>2729

GATCAGGCTATCTCTGCTTTGCCTTTTCTTTCACCTACCTCCTTCTTTCATGGCAGGAAG  
GGAAAGGAAAGTACCCCAAGCAGCCAGCAGTCAGCACTGGGGCCTCTAGGGAAGA  
GTGGATTGGTGTTGTTTTGCTGTG

>2730

GCCTTTTCTTTCACCTACCTCCTTCTTTCATGGCAGGAAGGGAAAGGAAAGTACCCCC  
AAGCAGCCAGCAGTCAGCACTGGGGCCTCTAGGGAAGAGTGGATTGGTGTTGTTTTGC  
TGTGGTTTGCTGTGCGTTTTCCAG

>2731

TTCATGGCAGGAAGGGAAAGGAAAGTACCCCAAGCAGCCAGCAGTCAGCACTGGGG  
CCTCTAGGGAAGAGTGGATTGGTGTTGTTTTGCTGTGGTTTGCTGTGCGTTTTCCAGAA  
TCTCTTTGGATGACTATCAGATT

>2732

AAAGTACCCCAAGCAGCCAGCAGTCAGCACTGGGGCCTCTAGGGAAGAGTGGATTG  
GTGTTGTTTTGCTGTGGTTTGCTGTGCGTTTTCCAGAATCTCTCTTGGATGACTATCAGA  
TTCAGTGAAGGGATGGACCTTCA

>2733

GTACCCCAAGCAGCCAGCAGTCAGCACTGGGGCCTCTAGGGAAGAGTGGATTGGTG  
TTGTTTTGCTGTGGTTTGCTGTGCGTTTTCCAGAATCTCTCTTGGATGACTATCAGATTC  
AGTGAAGGGATGGACCTTCAGGA

>2734

CAAGCAGCCAGCAGTCAGCACTGGGGCCTCTAGGGAAGAGTGGATTGGTGTTGTTTTG  
CTGTGGTTTGCTGTGCGTTTTCCAGAATCTCTCTTGGATGACTATCAGATTCAGTGAAG  
GGATGGACCTTCAGGAAGCTGAG

>2735

GGATTGGTGTTGTTTTGCTGTGGTTTGCTGTGCGTTTTCCAGAATCTCTCTTGGATGACT  
ATCAGATTCAGTGAAGGGATGGACCTTCAGGAAGCTGAGAGATAGGAGATCCTGTGGC

CTGGGAACCCAGAGGCCTGGGC

>2736

ATCTCTCTTGGATGACTATCAGATTCAGTGAAGGGATGGACCTTCAGGAAGCTGAGAG  
ATAGGAGATCCTGTGGCCTGGGAACCCAGAGGCCTGGGCCCTGGGAACAACCTACCA  
CAGGACTCAGCCTGCGAAATAGGAA

>2737

GGCCTGGGAACCCAGAGGCCTGGGCCCTGGGAACAACCTACCACAGGACTCAGCCTG  
CGAAATAGGAAACGTCATTGTAGCTTCTGCATCATGTTTTCCATGTTCCACTGGAAAAC  
CATCTGTAAATGGACATAGACCA

>2738

GGAACCCAGAGGCCTGGGCCCTGGGAACAACCTACCACAGGACTCAGCCTGCGAAAT  
AGGAAACGTCATTGTAGCTTCTGCATCATGTTTTCCATGTTCCACTGGAAAACCATCTG  
TTAAATGGACATAGACCAATTCTT

>2739

GGCCCTGGGAACAACCTACCACAGGACTCAGCCTGCGAAATAGGAAACGTCATTGTA  
GCTTCTGCATCATGTTTTCCATGTTCCACTGGAAAACCATCTGTAAATGGACATAGAC  
CAATTCTTGCTTTTCTTCTTTCTG

>2740

AACAACCTACCACAGGACTCAGCCTGCGAAATAGGAAACGTCATTGTAGCTTCTGCAT  
CATGTTTTCCATGTTCCACTGGAAAACCATCTGTAAATGGACATAGACCAATTCTTGCT  
TTTCTTCTTTCTGGTACCAAAG

>2741

AGCCTGCGAAATAGGAAACGTCATTGTAGCTTCTGCATCATGTTTTCCATGTTCCACTG  
GAAAACCATCTGTAAATGGACATAGACCAATTCTTGCTTTTCTTCTTTCTGGTACCAA  
AGAGAACGGTGGTGTCTCTTGT

>2742

GTTTTCCATGTTCCACTGGAAAACCATCTGTAAATGGACATAGACCAATTCTTGCTTTT  
CTTCTTTCTGGTACCAAAGAGAACGGTGGTGTCTCTTGTCATCTAGATGTTCTTGTAGG  
GGCACCAGAGTCATTGCAACC

>2743

CTGGAAAACCATCTGTAAATGGACATAGACCAATTCTTGCTTTTCTTCTTTCTGGTACC  
AAAGAGAACGGTGGTGTCTCTTGTCATCTAGATGTTCTTGAGGGGCACCAGAGTCAT  
TGCAACCATTTTGAGTAAAGAT

>2744

ACATAGACCAATTCTTGCTTTTCTTCTTTCTGGTACCAAAGAGAACGGTGGTGTCTCTT  
GTCATCTAGATGTTCTTGAGGGGCACCAGAGTCATTGCAACCATTTTGAGTAAAGATT  
GAGTCCACTGGGGCATCAGAAG

>2745

ACCAATTCTTGCTTTTCTTCTTTCTGGTACCAAAGAGAACGGTGGTGTCTCTTGTCATCT  
AGATGTTCTTGAGGGGCACCAGAGTCATTGCAACCATTTTGAGTAAAGATTGAGTCC  
ACTGGGGCATCAGAAGGGGAGT

>2746

TTCTTCTTTCTGGTACCAAAGAGAACGGTGGTGTCTCTTGTCATCTAGATGTTCTTGTA  
GGGGCACCAGAGTCATTGCAACCATTTTGAGTAAAGATTGAGTCCACTGGGGCATCAG



AAGGGGAGTGTGTCATTGCTGTT

>2747

AGAGAACGGTGGTGTCTCTTGTTCATCTAGATGTTCTTGTAGGGGGCACCAGAGTCATTGC  
AACCATTTTGTAGTAAAGATTGAGTCCACTGGGGCATCAGAAGGGGAGTGTGTCATTGC  
TGTGTGTTACCACACAGGCCGTGG

>2748

TTGTAGGGGCACCAGAGTCATTGCAACCATTTTGTAGTAAAGATTGAGTCCACTGGGGC  
ATCAGAAGGGGAGTGTGTCATTGCTGTTGTTACCACACAGGCCGTGGTACTTGCCTTTT  
CCTGACCCATTTTGCAGAGCAGG

>2749

GTAGGGGCACCAGAGTCATTGCAACCATTTTGTAGTAAAGATTGAGTCCACTGGGGCAT  
CAGAAGGGGAGTGTGTCATTGCTGTTGTTACCACACAGGCCGTGGTACTTGCCTTTTC  
CTGACCCATTTTGCAGAGCAGGCC

>2750

GTCATTGCAACCATTTTGTAGTAAAGATTGAGTCCACTGGGGCATCAGAAGGGGAGTGT  
GTCATTGCTGTTGTTACCACACAGGCCGTGGTACTTGCCTTTTCCTGACCCATTTTGC  
GAGCAGGCCAGCTACTTAACCCC

>2751

GGTACTTGCCTTTTCCTGACCCATTTTGCAGAGCAGGCCAGCTACTTAACCCCTCGCCA  
CCCACTCACCTGTGGAAGGCACATTTGCAAAACAATAGACCAGTTGGTAATTTGGCAC  
TTGTTAGGTAGACATAGTGGTAC

>2752

AGCAGGCCAGCTACTTAACCCCTCGCCACCCACTCACCTGTGGAAGGCACATTTGCAA  
AACAATAGACCAGTTGGTAATTTGGCACTTGTTAGGTAGACATAGTGGTACATTGAGGA  
AGTTCCTCCTGTTAACCTAACCTA

>2753

GGCCAGCTACTTAACCCCTCGCCACCCACTCACCTGTGGAAGGCACATTTGCAAAACA  
ATAGACCAGTTGGTAATTTGGCACTTGTTAGGTAGACATAGTGGTACATTGAGGAAGTT  
CCTCCTGTTAACCTAACCTAGTTT

>2754

CTCACCTGTGGAAGGCACATTTGCAAAACAATAGACCAGTTGGTAATTTGGCACTTGTT  
AGGTAGACATAGTGGTACATTGAGGAAGTTCCTCCTGTTAACCTAGTTTTTCTTG  
CTGTAATCCGAATATACTTCTC

>2755

ACATTTGCAAAACAATAGACCAGTTGGTAATTTGGCACTTGTTAGGTAGACATAGTGGT  
ACATTGAGGAAGTTCCTCCTGTTAACCTAGTTTTTCTTGCTGTAATCCGAATATAC  
TTCTCTGATTTTTTGAAAAAG

>2756

AAACAATAGACCAGTTGGTAATTTGGCACTTGTTAGGTAGACATAGTGGTACATTGAGG  
AAGTTCCTCCTGTTAACCTAGTTTTTCTTGCTGTAATCCGAATATACTTCTCTGATT  
TTTTGAAAAAGCCTGTGAGT

>2757

GCACTTGTTAGGTAGACATAGTGGTACATTGAGGAAGTTCCTCCTGTTAACCTAG  
TTTTTCTTGCTGTAATCCGAATATACTTCTCTGATTTTTTGAAAAAGCCTGTGAGTGGAG

CCTGGCTCGACAGCCCAAAAC

>2758

CCTCCTGTAACTAACCTAGTTTTCTTGCTGTAATCCGAATATACTTCTCTGATTTTTTG  
AAAAAGCCTGTGAGTGGAGCCTGGCTCGACAGCCCAAAACGCTGAATTAATTCTGTCT  
CTCTCTCTCTCTCTTTTTTTT

>2759

CTGTAACTAACCTAGTTTTCTTGCTGTAATCCGAATATACTTCTCTGATTTTTTGAAAA  
AGCCTGTGAGTGGAGCCTGGCTCGACAGCCCAAAACGCTGAATTAATTCTGTCTCTCT  
CTCTCTCTCTTTTTTTTTTTT

>2760

CTTCTCTGATTTTTTGAAAAAGCCTGTGAGTGGAGCCTGGCTCGACAGCCCAAAACGC  
TGAATTAATTCTGTCTCTCTCTCTCTCTTTTTTTTTTTTGAGACGTGGAGTCTCGCTCT  
GTCACCCAGGCTGGAATGCGC

>2761

GCCTGGCTCGACAGCCCAAAACGCTGAATTAATTCTGTCTCTCTCTCTCTCTTTTTTTT  
TTTTTGAGACGTGGAGTCTCGCTCTGTACCCAGGCTGGAATGCGCTGGCACGATCTC  
GGCTCACTGCAACTTCCACCTC

>2762

AGTCTCGCTCTGTACCCAGGCTGGAATGCGCTGGCACGATCTCGGCTCACTGCAACT  
TCCACCTCCTGGGTCCAAGCAATTCTCCTGCCTCAGCCTCCCAAGTAGCTGGGACTAC  
AGGCATTGCCACTACGCCAGCTA

>2763

TGGCACGATCTCGGCTCACTGCAACTTCCACCTCCTGGGTCCAAGCAATTCTCCTGCCT  
CAGCCTCCCAAGTAGCTGGGACTACAGGCATTGCCACTACGCCAGCTAATTTTTGTAT  
TTTAAATAGAGACGGGGTTTCG

>2764

GCAATTCTCCTGCCTCAGCCTCCCAAGTAGCTGGGACTACAGGCATTGCCACTACGCCC  
AGCTAATTTTTGTATTTTAAATAGAGACGGGGTTTCGCCGTGTTGGCCAGGCTGGTCTC  
AAACTCCTGATCTCAGGTGATC

>2765

TCCCAAGTAGCTGGGACTACAGGCATTGCCACTACGCCAGCTAATTTTTGTATTTTAA  
TAGAGACGGGGTTTCGCCGTGTTGGCCAGGCTGGTCTCAAACCTCCTGATCTCAGGTGA  
TCCACCAGCCTTGGCATCCCAA

>2766

CATTGCCACTACGCCAGCTAATTTTTGTATTTTAAATAGAGACGGGGTTTCGCCGTGTT  
GGCCAGGCTGGTCTCAAACCTCCTGATCTCAGGTGATCCACCAGCCTTGGCATCCCAAA  
ATGCTGGGACTGCAGGAATGAG

>2767

ATTTTTGTATTTTAAATAGAGACGGGGTTTCGCCGTGTTGGCCAGGCTGGTCTCAAACCT  
CCTGATCTCAGGTGATCCACCAGCCTTGGCATCCCAAAATGCTGGGACTGCAGGAATG  
AGCCACCGCGCCCGACCCAATTC

>2768

CACCAGCCTTGGCATCCCAAAATGCTGGGACTGCAGGAATGAGCCACCGCGCCCGAC  
CCAATTCTCTTGAGTGACATGCTGAGTGGGGCTGCTTTTTTGGTGGAGGTAACAAAAAA

AGAGTTGAGGTATTGATTTTAGTTT

>2769

CATCCCAAAATGCTGGGACTGCAGGAATGAGCCACCGCGCCCGACCCAATTCTCTTGA  
GTGACATGCTGAGTGGGGCTGCTTTTTGGTGGAGGTAACAAAAAAGAGTTGAGGTAT  
TGATTTTAGTTTCATTTGAGACAG

>2770

GACTGCAGGAATGAGCCACCGCGCCCGACCCAATTCTCTTGAGTGACATGCTGAGTGG  
GGCTGCTTTTTGGTGGAGGTAACAAAAAAGAGTTGAGGTATTGATTTTAGTTTCATTT  
GAGACAGCGATCTGTCCCCTCCC

>2771

AGGAATGAGCCACCGCGCCCGACCCAATTCTCTTGAGTGACATGCTGAGTGGGGCTGC  
TTTTTGGTGGAGGTAACAAAAAAGAGTTGAGGTATTGATTTTAGTTTCATTTGAGACA  
GCGATCTGTCCCCTCCCTGAGTT

>2772

GCGCCCGACCCAATTCTCTTGAGTGACATGCTGAGTGGGGCTGCTTTTTGGTGGAGGT  
AACAAAAAAGAGTTGAGGTATTGATTTTAGTTTCATTTGAGACAGCGATCTGTCCCCT  
CCCTGAGTTCCTCGTTTGTTTG

>2773

TTGAGTGACATGCTGAGTGGGGCTGCTTTTTGGTGGAGGTAACAAAAAAGAGTTGA  
GGTATTGATTTTAGTTTCATTTGAGACAGCGATCTGTCCCCTCCCTGAGTTCCTCGTTT  
GTTTGTAAACTGCTTAAATGAAC

>2774

CTGCTTTTTGGTGGAGGTAACAAAAAAGAGTTGAGGTATTGATTTTAGTTTCATTTGA  
GACAGCGATCTGTCCCCTCCCTGAGTTCCTCGTTTGTTTGTAAACTGCTTAAATGAAC  
TTTTTCCCCTGTTCCCTCCATCA

>2775

GAGGTAACAAAAAAGAGTTGAGGTATTGATTTTAGTTTCATTTGAGACAGCGATCTGT  
CCCCTCCCTGAGTTCCTCGTTTGTTTGTAAACTGCTTAAATGAACTTTTCCCCTGTT  
CTCCATCACTCTGCTGTTCTC

>2776

AAAAAAGAGTTGAGGTATTGATTTTAGTTTCATTTGAGACAGCGATCTGTCCCCTCCC  
TGAGTTCCTCGTTTGTTTGTAAACTGCTTAAATGAACTTTTCCCCTGTTCCCTCCATCA  
CTCTGCTGTTCTCTTCTCCTC

>2777

AGACAGCGATCTGTCCCCTCCCTGAGTTCCTCGTTTGTTTGTAAACTGCTTAAATGAA  
CTTTTTCCCCTGTTCCCTCCATCACTCTGCTGTTCTCTTCTCCTCCTCTTATCCTAACAGTC  
TCATAGGTAAACTTAGAAGG

>2778

CCCTGAGTTCCTCGTTTGTTTGTAAACTGCTTAAATGAACTTTTCCCCTGTTCCCTCCA  
TCACTCTGCTGTTCTCTTCTCCTCCTCTTATCCTAACAGTCTCATAGGTAAACTTAGAAG  
GAAGACAAATACTTACAAAT

>2779

TGCTTAAATGAACTTTTCCCCTGTTCCCTCCATCACTCTGCTGTTCTCTTCTCCTCCTCTT  
ATCCTAACAGTCTCATAGGTAAACTTAGAAGGAAGACAAATACTTACAAATTGTCACCG

AGGGTACCATAAAAAGAGACA

>2780

TTCTCTTCTCCTCCTCTTATCCTAACAGTCTCATAGGTAACTTAGAAGGAAGACAAAT  
ACTTACAAATTGTCACCGAGGGTACCATAAAAAGAGACATTTGGACAGTAGTTCTGGGG  
AGATCCTTGTCTTTGCTTCATGT

>2781

CTCCTCTTATCCTAACAGTCTCATAGGTAACTTAGAAGGAAGACAAATACTTACAAAT  
TGTACCGAGGGTACCATAAAAAGAGACATTTGGACAGTAGTTCTGGGGAGATCCTTGT  
CTTTGCTTCATGTTAATACAGAG

>2782

GGTAACTTAGAAGGAAGACAAATACTTACAAATTGTCACCGAGGGTACCATAAAAAGA  
GACATTTGGACAGTAGTTCTGGGGAGATCCTTGTCTTTGCTTCATGTTAATACAGAGGG  
ATTGGGGTAGCCCAGATCACCAG

>2783

AACTTAGAAGGAAGACAAATACTTACAAATTGTCACCGAGGGTACCATAAAAAGAGAC  
ATTTGGACAGTAGTTCTGGGGAGATCCTTGTCTTTGCTTCATGTTAATACAGAGGGATT  
GGGGTAGCCCAGATCACCAGGGG

>2784

AAATACTTACAAATTGTCACCGAGGGTACCATAAAAAGAGACATTTGGACAGTAGTTCTG  
GGGAGATCCTTGTCTTTGCTTCATGTTAATACAGAGGGATTGGGGTAGCCCAGATCACC  
AGGGGAAAGTGGTTTTTCTTCA

>2785

AAAGAGACATTTGGACAGTAGTTCTGGGGAGATCCTTGTCTTTGCTTCATGTTAATACA  
GAGGGATTGGGGTAGCCCAGATCACCAGGGGAAAGTGGTTTTTCTTCATTTAGCTTTTA  
ATTGCTTTCTTTCACTTTTATG

>2786

CTGGGGAGATCCTTGTCTTTGCTTCATGTTAATACAGAGGGATTGGGGTAGCCCAGATC  
ACCAGGGGAAAGTGGTTTTTCTTCATTTAGCTTTTAATTGCTTTCTTTCACTTTTATGTAT  
AAAAGATTGTCCATTTAATT

>2787

GGGAGATCCTTGTCTTTGCTTCATGTTAATACAGAGGGATTGGGGTAGCCCAGATCACC  
AGGGGAAAGTGGTTTTTCTTCATTTAGCTTTTAATTGCTTTCTTTCACTTTTATGTATAAA  
AGATTGTCCATTTAATTAAC

>2788

GGTAGCCCAGATCACCAGGGGAAAGTGGTTTTTCTTCATTTAGCTTTTAATTGCTTTCTT  
TCACTTTTATGTATAAAAGATTGTCCATTTAATTAAGTCAAGAATGCAATTTCAAAAACA  
CTAATGCTTTACACATGACG

>2789

CACCAGGGGAAAGTGGTTTTTCTTCATTTAGCTTTTAATTGCTTTCTTTCACTTTTATGTA  
TAAAAGATTGTCCATTTAATTAAGTCAAGAATGCAATTTCAAAAACACTAATGCTTTAC  
ACATGACGGCTTTTAAAATA

>2790

CATTTAATTAAGTCAAGAATGCAATTTCAAAAACACTAATGCTTTACACATGACGGCTT  
TTAAAATAAAAGTAGCATTCTAATATTGCATAATGCTTTTCTATCCCCCTCCTCTCCCCGC

GTTCACCCCCACCCCTCCAG

>2791

TGACGGCTTTTAAAATAAAAGTAGCATTCTAATATTGCATAATGCTTTTCTATCCCCTTCC  
TCTCCCCGCGTTACCCCCACCCCTCCAGACTGTATTAACCTTTCATAGCGGAGGGTTG  
TTAGGAGGAAAACGCTGTTC

>2792

GCATTCTAATATTGCATAATGCTTTTCTATCCCCTTCCTCTCCCCGCGTTACCCCCACCC  
CTCCAGACTGTATTAACCTTTCATAGCGGAGGGTTGTTAGGAGGAAAACGCTGTTCTG  
GATGGTGCCTCTCTGCCTCTC

>2793

TTTCTATCCCCTTCCTCTCCCCGCGTTACCCCCACCCCTCCAGACTGTATTAACCTTTC  
ATAGCGGAGGGTTGTTAGGAGGAAAACGCTGTTCTGGATGGTGCCTCTCTGCCTCTCC  
TTCCCACCAACCAAGTACAGCA

>2794

CTATCCCCTTCCTCTCCCCGCGTTACCCCCACCCCTCCAGACTGTATTAACCTTTCATA  
GCGGAGGGTTGTTAGGAGGAAAACGCTGTTCTGGATGGTGCCTCTCTGCCTCTCCTTC  
CCACCAACCAAGTACAGCAGCA

>2795

CCGCGTTCACCCCCACCCCTCCAGACTGTATTAACCTTTCATAGCGGAGGGTTGTTAGG  
AGGAAAACGCTGTTCTGGATGGTGCCTCTCTGCCTCTCCTTCCCACCAACCAAGTACA  
GCAGCACGACAGCCGCAGGCCTT

>2796

AGCGGAGGGTTGTTAGGAGGAAAACGCTGTTCTGGATGGTGCCTCTCTGCCTCTCCTT  
CCCACCAACCAAGTACAGCAGCACGACAGCCGCAGGCCTTTCTGAAGTGTTCCTAG  
CTTCTGTAAGAAAGAGACTACTCAT

>2797

GATGGTGCCTCTCTGCCTCTCCTTCCCACCAACCAAGTACAGCAGCACGACAGCCGCA  
GGCCTTTCTGAAGTGTTCCTAGCTTCTGTAAGAAAGAGACTACTCATCCCTTCCCCCT  
TGGCCGGTTTCATGCCTATATTT

>2798

CTCTCCTTCCCACCAACCAAGTACAGCAGCACGACAGCCGCAGGCCTTTCTGAAGTGT  
TCCGTAGCTTCTGTAAGAAAGAGACTACTCATCCCTTCCCCCTTGGCCGGTTTCATGCC  
TATATTTACCCTCTTTTGGGGGT

>2799

CCGCAGGCCTTTCTGAAGTGTTCCTAGCTTCTGTAAGAAAGAGACTACTCATCCCTTC  
CCCCTTGGCCGGTTTCATGCCTATATTTACCCTCTTTTGGGGGTCACTGTGGCTCCTACT  
CCCATTGCTGCCTTTTAAGAA

>2800

CTGTAAGAAAGAGACTACTCATCCCTTCCCCCTTGGCCGGTTTCATGCCTATATTTACCC  
TCTTTTGGGGGTCACTGTGGCTCCTACTCCCATGCTGCCTTTTAAGAAGCATCATTATG  
ATGGATTACATGGGAAAATT
