# Supplementary material for: iSS-PseDNC: Identifying Splicing Sites Using Pseudo Dinucleotide Composition
Source: Hindawi journal article supplement (doi:10.1155/2014/623149), 2014-01-01
Supplement: f1 [file 623149.f1.zip]

**Supporting Information S2. The benchmark dataset for splice acceptor sites.** It consists of a positive dataset  $\mathbf{S}_2^+$  and a negative dataset  $\mathbf{S}_2^-$ . The former contains 2,880 true splice acceptor site containing sequences, while the latter contains 2,800 false splice acceptor site containing sequences.

$\mathbf{S}_2^+$ : 2,880 true splice acceptor site containing sequences

>1

GGCCAGGGGCATAGAGCTGGCCAAGGAGCCATGGCTCACTAACGTGTTGTATGGGGCT  
CCTTCCCTTCAGGTCCAGGCTCCTGCGTGAAAGTGATGCTCCTCTTTGCCTTACTCCTAG  
CCATGGAGCTCCCATTGGTGGCA

>2

GAGTGAGCTGGTAATGGGTGGAAAAGGCGTAGTGGAGCAGAAGCCTGAAGCCTGCTT  
TCTCCCCTCTCAGGGACTTACAGTTTGAGATGCCATGACTGTGCGGTCATAAATGACTT  
CAACTGTCCCAACATTAGAGTATG

>3

TGTATGTGCCTCAATATTTACAAGCAGAAAATGTGAAATCAATTATTTTCATTGCTGCTT  
CTTTTTTTAGGCATAAATTCTCGTGAACACTTGTATTATAAGAACTGTACAAACAACCTGC  
ACATTTGTATATGCAGCTGA

>4

GTAGGGCTCAGCTCCGCCCCTGTCACTACACGCTGGGGACACACCACACTGCCCCGACT  
TCTCCTCCCCAGGTGGGCGCTCCTCGCCAAAAAAGGCTACCAGGAGCGGGACCTGGA  
ACCCAGTTTTCCATCATCACCAA

>5

AGGCTGCCGGCTTCCGGCCTTTCCAGTCAACACGAGCCCAGCCAGGCCAACCTTGAG  
ACTTGCCTCCTAGGGAGAGAACGTGTTCTTCTTGGTGACCAACTTCCTTGTGACGCCA  
GCCCAAGTTCAGGGCAGATGCCAG

>6

CCTTTGAGACTGGGCTGTGGAGGGGAGACATCCCCTGTGCCATTGGTGACTGCTCTCT  
CTCCACCTCAGCACCCGTCCGTCCCACTGGCTAACTGCTGGGTCGACGAGGACTGCC  
CCGAAGGGGAGGGAGGCACACACA

>7

ACCCCTGGCTGAAGGCCTCCCCAGGCCTGCAGAGATTTGAAGGTCTGGAGTTCATCT  
TTTGTCTTCTAGGTGTAAAAACAGGCCAGTGTGTGGTGTTCATGGGACCCACAGGAC  
CTGTGAGATCTGGAGTTGGTGCCC

>8

ACAATCCCCTACCCCAACTGGCGCAGGGCCCCAGGCCTGGCAGAGGCTGTCACCTCCC  
TTCCACCTGCAGGAGGCCCTGTGGCCAGGCCAGAACTTCACACTGTTTCATCAA  
AACACAGTCACCTTCAGCAAGTTC

>9

AGAGTGGGTCTCATCTGCCCCAAGACCCTCCTTGTCCCCTACCTCATCTGACCTTTCCC  
ACTCCTCCCAGGTCCAATGCCTTGAGACCTGGGACCCACCTATTTTAAGCACTGCC  
GCTATGAACCACAATTCAGCCCC

>10

GGTTCCTAGAGGGCTCTGGGAGAGGGTCCCGGGCCACCCACCGGTGGAAAAGCTAT

GTGCTATGTGCAGGGTGGCTCTGTAGGCATCAGAGTTCACTGGGATTGTGACCTGGAC  
ACCGGGGACTCTGGCTGCTGGCCTC

>11

GGTCTGGCAGGGCCAGCCCCACCTGGGGGTGGGCAAAGCAGGTCACCAGAGCCTTCT  
TTCCTGCCCACAGGACAGCCACTCACTGGTGGGAGCAACCGGGTGTGGAGGCCCGCA  
CCCTGCTCAAGCTCTATGGAATCCGC

>12

GTGCAGGCTGGGGAGGTGGCAGGAAAGCAGGCTCGGGGGCTGGAACATGGGTGGC  
CCTGCCTCTCCCAGGTCACCTTTTTCTGTGACCTGCTACTGCTGTATGTGGATAGAGAA  
GCCCATTTCTACTGGAGGACAAAGT

>13

TTGGACCCTGGGTCTGCCACACTTAGGAAGATGTTGGCTGGATCCCTGACCTGCTGTC  
CTCATCTGCAGGCCAAGGCCCGAAAGCAACCGCCAACCTCTGTGTGGAGGGAGCTGG  
CCCTTGCATCCCAAGCCCGACTGG

>14

GAGGTTGTGGCCTCGGGTCGGCGTCTGAGGACCCGCTGACGCTCCGGTGCCCCTCCGT  
CCTCTCTCACAGCGTGCTGAGCTACGTGGCGGGCATCGCCTGGTTCTTGGCGCTGGTTT  
TCCCGCCGCTGACCCAGCGCACT

>15

GGGCGTATGGGGCGAGCAGTGGTGGCTAAGGCCGGGGAGCTCTGCTCAGAGGCTCCC  
TTCGTGTCTGCAGGGCTCTGCCAGTGGCCTGGCTTGAACGGACGATGCGGTCAGTAGG  
GCTGGAGGTCTACACGCAGAGTTTC

>16

GTTGTGGGGGGCCCTTCAGCCCCCTACCACAAAGTTACACTGAGGCTCCCCCACC GA  
TGCTGCATACAGATGGTGTCTGGGCACCAACGTGTACGGCATCCTGCGGGCCCCGCGTG  
CTGCCAGCACCGAGTCGCTTGTGC

>17

TCAGGGCTGCTGGCCGTGGAGGGGTTTGGTCAGTGCCCCAGACCCTGCTGATCCTGCT  
TCTGGCCTCCAGGGCAGATTTATTGGGCCAAAGATATCGTCTTCCTGGTAACAGAACAT  
GACCTTCTGGGCACTGAGGCTTG

>18

CCTGGTCCCCCTCTCAGGGTCACTGTCCTCACCACGTCCTCCATTAGCACTCATTCCT  
TGCTCCTACAGGCATGCAGTCGTCTCCCCTGCAGGGCCGAGCTGGGGCCATTACAGGCA  
GCCGTGGCCCTGGAGCTGAGCAG

>19

GCCTGCCTGAGGGCTGAAGGGCACAGGGTCTGTGGGAGGGGCTGTCTCATCCTGTCCT  
GCACCTCTAAAGCTGCAGCCCGAGGACTGGACATCATTGGATGGACCGCTGCAGGGCC  
TGCAGACACTGCTGCTCATGGTTC

>20

TCTAGCTGGAGCGGAGTGGGGGATGGCCTGGTGGCTCTGGCCAGCCGTGAACCTGCC  
CCACACCTGACAGGGCTTTGGAGGGCATGTTCCGCAAGCTCAACCACCTCCTGGAGC  
GCCTGCACCAGTCCTTCTTCCTCTAC

>21

TGGGATGGTGGTGGTCTTTGGGGATCCCCTGGCCCCAGGGTCCATCTCCAAGAGCCTG

TGTGCCCTGCAGGGTGTGGGGCTGGCCTCGCTCGTGGCACCTCTGCTGATCTCACAGG  
CCATGGGACTGGCCCTCTATGTCC

>22

GGGGCAGGGGTAGAGGTCCCCTGGACATGCAGACAGCTTGTGGGTTGCCTCTGAGTC  
CTTTGTCTTACAGGGTGGTAAGCACACAGGCCCCAGACAGGGGCTGGATGGCACTGA  
AGCTGGTAGCCCTGATCTACCTAGCA

>23

AGCCCTTTCCCCCAACCTGGTGCCCATGCCCCACCATGGAGCCTACCTTGATGTTGCT  
TCTCCACCCAGGACCCTCTATGCTGCCCTGCTGGTGCTGACCAGCCCGGCAGCCACGC  
TCCTTGGCAGCCTGTTCTGTGG

>24

AGGTTCCCGGCTTGATGGGGCCAGGATGGGGCTCCTGGGTGCAGTCAGAGTTCCCACC  
TCCCTCCCCTAGGAAGTGCATCGGGCAGGCGTTCGCGATGGCGGAGATGAAGGTGGTC  
CTGGGGCTCACGCTGCTGGCCTTC

>25

GGGGGCGCAGGACCCGGGAAGCCGCGCCTGGAGGAGGGTCGGGCGGGTCTCAGCCA  
CTCCTCGCCCCCAGGCTCCCCTCCATGAGGTATTTCTACACCTCCGTGTCCCGGCCCG  
GCCGCGGGGAGCCCCGCTTCATCGC

>26

AAAATCCCCCGGGTTGGTCGGGGCGGGGCGGGGCTCGGGGGACCGGGCTGACCTCG  
GGGTCCGGGCCAGGTTCTCACACCATCCAGAGGATGTATGGCTGCGACGTGGGGCCCG  
ACGGGCGCTTCCTCCGCGGGTACCA

>27

CCACATGTGTGCTGGAGGAGTGTCCCATGACAGATGCAAAATGCCTGAATGTTCTGAC  
TCTTCCTGACAGACGCCCCCAAGACGCATATGACTCACCACGCTGTCTCTGACCATGA  
GGCCACCCTGAGGTGCTGGGCCCT

>28

TTTAATACATAAAAAAAAAAACCCGCTAGGTTTCCATGTGCTACTCACATGTTGCTTTTG  
GCATTCTCAGGAAAATACAAGTGTATATTACTTAGTCTTAGATGTGCAAGAATCGGAC  
TGTTTCGGTCCTATCCAGGAAAT

>29

CTTTCATATCTGACCTGAGGAAGGCAGGATGCAATGACTCAGCAAGTCCTCAAGAGCC  
TCTTCTTACAGGTGATCGGACAATGTAAGGTAATAGCTACAAGACATTCCCATGAATC  
TCAGGACCTCAGAGTGATTGACT

>30

CATTCTTGCCACCAAGCCACCATTAACATTTCCAGCCCTTTACTGTGACACTGCTATCTT  
CTTCTCAGTCTCTTCAGCACTGGCCAATACCAAAGATAGTCCGGTCCTCATAGATT  
CTTTGAGGATACTGAGCGCTA

>31

AGTTATCTACTGCTTTTTTTTCTTTTCTTTGTCTGTTCTTGAACTATTTTGATCCCAT  
CTGTTCTAGAGAGGAGGGGAAGGAAGTGGTTACTTCGTGGACTTCTCTGTGCGGAAGT  
GCCCCAGACACCATTTCCCCA

>32

AAGCTAACTCTGGCTGGTCATCTTCACACCACCTGGACACACACACTAACAGCTCCTC

ATTCCTTTGTAGGTCTTTGGATTCTGCAGAGCAGATTTGTTCTATGATGTAGAAGCCTTG  
GACTTGGAAGCCCGAAAAACC

>33

ATCAAGTCAAGTATCTAACATCTTCTTTTATGTTACATGATGATAGGCACTTTTCTGTGA  
CCTTTTCCAGGAACATGAGAACATCAATGGTGTACCGCCTCATTGGGACATCCCTTCC  
ACTGGGGTGGGCATGAGCGTT

>34

GGCGTGGGCACAGGTCAAGCTGAAAGTCCCCGCCAGGTATCCAAGTGTCCGCTGTGT  
CCGCTCCCCCAGGTGCAGGGCGCCGCGCACTTCGGGCGGTGTGGCTAGCCAGCTTTG  
GGACAGTGCGCACCGTGTACGTGG

>35

CCTTCACTGCAGCCAGTCCCGTCGAGCCGTCCCCACCTTCCCGATGCGCACTCTCTCCT  
CAACCCTGCAGGGAAGGCGAAGAATGGCAAAGGCTCCGCAGTCTCCTGGCCCCGCTC  
CTCCTCCGGCCTCAAGCGGCCGCC

>36

GAGCTGGGCAGGCGTCGGGGGCGCCCTACCAGAGCCTCCCGGAACCCTGACGGCGCC  
CCCTCCCGACGAGGCATCGCCGCGGTTCTGCTCGGCTCGCGCTTGGGCTGCCTGGAGG  
CTCAAGTGCCACCCGACACGGAGAC

>37

GAGGTGGAATGGGGGAATGTAAAGCTGTCCAGGGGTAGCGAGGTATTCACGTGCCTT  
CTACCCACGCAGCTCAGAGGCACGTGGAGCGGCGAGAGGCAGAGGCAGCCATGAGG  
AACGGAGGACAGCCCGAGAAGGACCT

>38

TCTTCCATAATCTGCACCCTCTGCTGGGTTCTCACACCCAACACCTCTCTTGCTTTTACA  
TGTTTTTCAGGTGTCCAACACGCTCTCTTGGGCTCTGTATGAGCTCTCCCGGCACCCCG  
AAGTCCAGACAGCACTCCACT

>39

GAAACAATGAGAAGGGGGCTGCAGCCCCCTAGCCTCATCTTGTTGTCTCCATTTTGTGCT  
TTGCAACCTAGACTGTACCCTGTGGTACCTGGAAATTCTCGTGTCCCAGACAAAGACA  
TTCATGTGGGTGACTATATTATC

>40

TGAATATCCTCTTCTTCATGCCTGCCCTATTCTGAGCCCAAAGTGTGTTTTCC  
TTTGCACCAGACGCTGGTCACTCTGTGTCACTATGCCACTTCAAGGGACCCCTGCCAG  
TTCCAGAGCCAAATTCTTTTC

>41

ATTGGATTACCAATGAATCCCCCATTATAGATATCTTTCATAGTAATGCTCACCTTCTTC  
CCTTTCCAGATCCTAACACATTTTGAGGTGCAGCCTGAGCCAGGTGCGGCCCCAGTTA  
GACCCAAGACCCGGACTGTCC

>42

GCTCTCTCACTTGATGTAGACCCATTTGAATGAATCTCCTTTTGCTTTCTCTTTCTTTAAT  
ATTTTTCAGGTACGAGCAGGTGATAATAATATATGCACTTGAAAGTATTCAAAAGTCTT  
CCCGGACAAAATGAGGACT

>43

GACTGGGATTAGGGGTTGGGGTGGTGGTCCCAGGGGCATGCTCAGTGGTTCTCTTTTC

TCTGGGGCACAGGCTCTGGGCGTGGGGAGGCTGAGACACGGGAGTGCATCTACTACA  
ACGCCAACTGGGAGCTGGAGCGCAC

>44

TGGCAGGGCAGGCCTGGGGGAGTCTTGCATCCCCCAGGTGAGGGGTATATGGAAAATT  
CTGTGCCTCCAGGCAGGAGTGTGTGGCCACTGAGGAGAACCCCCAGGTGTACTTCTGC  
TGCTGTGAAGGCAACTTCTGCAAC

>45

CCCTGTATTCTGGCTCTGGAAGTGTGAGGGTGGGCAGACTGTTTGACACAGGGCTCTG  
TGTGTCCCCCAGTCACGTACGAGCCACCCCCGACAGCCCCCACCCTGCTCACGGTGCT  
GGCCTACTCACTGCTGCCCCATCGG

>46

TGGCTTGGGGCAGGGCAGGATAGAGGTGGGGAGGACAGGCCAGACCTTTTTAACCCT  
TGCTCTCCCCCAGGACCTGGGCCTCCACCACCATCCCCTCTGGTGGGCCTGAAGCCA  
CTGCAGCTGCTGGAGATCAAGGCTC

>47

GTAGGGCAATGTGACTGCAGCAGGGGTAAAGCCAGCCACTTGTCCCCCAACCCCTCGC  
CCCCGGCCTCAGGACAAGCAGTCGTGGCAGAGTGAACGGGAGATCTTCAGCACACCT  
GGCATGAAGCACGAGAACCTGCTAC

>48

TGCCAGGGCTGGGCTGGGTCCCTGTCTGTACCCAGAATCTGTGCTCAAGTTCTGTGCC  
GTCTTCTCTCAGGGCTCCCTCACGGATTACCTCAAGGGGAACATCATCACATGGAACG  
AACTGTGTCATGTAGCAGAGACGA

>49

GTATCTTGGGAACCAAGGTGGGAGTTGGATCATGATGTTAAGCTTTATCTCTGCCCCACT  
TGTTTCCACAGGGACTTTAAAAGTAAGAATGTATTGCTGAAGAGCGACCTCACAGCCG  
TGCTGGCTGACTTTGGCTTGGCT

>50

AACTCCCATGTCCCAGCTGTGTGTGTATGGCCAGTCACTGTAAATCCTGCCCTCCTCTG  
TCCTCACATAGGTAGGCACGAGACGGTACATGGCTCCTGAGGTGCTCGAGGGAGCCAT  
CAACTTCCAGAGAGATGCCTTCC

>51

CATCCTAGATTGAGTGATAGGGAGCAGTGGGACCTTAGAGTGATCCTGCCAGGCTCTCT  
CTTCTCCTAGGACCCGTGGATGAGTACATGCTGCCCTTTGAGGAAGAGATTGGCCAG  
CACCTTCGTTGGAGGAGCTGCA

>52

TCCCCCAAAGCTTTTCCTCACTGAAGGGTCCTAACAAAGGTGTCTTTTCCTGTCTGCCCT  
ATGCTGCTTAGGGCCTGGCCCAGCTTTGTGTGACCATCGAGGATTGCTGGGACCATGAT  
GCAGAGGCTCGCTTGTCCGCGG

>53

TGTGTTAAGAGGGCATCTGCTGGGAAACGATTTGAGGAGAAGGTACTAAATTGCTTGG  
TATTTTCCGTAGGAACCCAGAGCGAAATACAGTTTGCAAAAGATGTCCAGATGGGTT  
CTTCTCAAATGAGACGTCATCTAA

>54

TTTGTATTGAATAGACTCTCAGAAATCCAATTGTTGAGTAAATCTTCTGGGTTTTCTAAC

CTTTCTTTAGATGTTACCTGTGTGAGGAGGCATTCTTCAGGTTTGCTGTTCCCTACAAA  
GTTTACGCCTAACTGGCTTAG

>55

GCTTGTTTTATGATGGCATTGGATGAATATAAATGATGTGAACACTTATCTGGGCTTTTG  
CTTTATGCAGATATTGACCTCTGTGAAAACAGCGTGCAGCGGCACATTGGACATGCTAA  
CCTCACCTTCGAGCAGCTTCG

>56

GAGAATTTATACCAAGCGTATTCTGAGTTTACTCACTTTCTCCACAATGTTTCCTTTTTT  
CCTTGAACAGGAAAAAAAAAAGAAGATGGGTTTTTTAAGTCCAATATATGTTATTTTC  
TTCTTTTTTGGAGTCAAAGTA

>57

ACATAGAATTATGGCTATAACTATGGATTATACTATAATACAAGATTAATTTTTAATTTATT  
TCTTTCAGAGATGAATCTTACAGTGATGTGTCTTCTATTGACCCACTACATTACCACCA  
TTTAACATACATTCGTGT

>58

AAAGGGACCAGGAGCAGCTGGCTTGCTTGTGAACAATGACTTGGGATCTTCTGTGCC  
TGTCTCTTGACAGTTGGTACCAACAAAGAGCTCTGCTGCCTCGTCTATACCTCCTGGCAG  
ATTCCACAAAAGTTCATAGTTGA

>59

AAGGACGCAGGGGCCACAGGATTCCCCTGATGAATTCGTCAGTTCTTAACTCTTCCTCC  
CTTCTCCACAGCCTCCTAACCAAGAGAGGGCCGGCAGATCTGTGCTGACCCCAATAAGA  
AGTGGGTCCAGAAATACATCAGC

>60

GCGCTGAGTGGGGCGTGTGGATGTCCCTGAGCCCAAGTGACAGAGCCTCCCCTCCCTC  
GTGCTGCTGCAGGGCACGGCCCCACCCGGAGGCTGCGAGGCTTGGGGGTCCTGGCCG  
GGGTGGCTCTGCTCGCTGCCCTCTG

>61

TTCTGAGTCTGCATGCTAGAGCCGCTTTCTGCTGCTTCTATTAATACAGCATTTCCTT  
TGTCTCTCAGGGTTTATGGTCCAGCAGAGTCTCAGAGCGCGGTCTTTGGAGATGTGTG  
CCCCCTACTCACTTCTCTCTTG

>62

GAAAATTTTTCTGGAATCTTCTTGGCACCCACGTGTGTTTTGCTGGACTGAATCTGCT  
CTGAATTTTAGGTACAATGTTTGTGTTATGGCGTATGGACAGACGGGCAGCGGAAAGA  
GCTATACCATGCTGGGACGCCAT

>63

TATGATTGGCTTACACTGAAAATCACTCTGTGAGACTTTCTGTAAGTTTCTCTTGTGTGT  
TTTCCCGCAGGCTCATTTTGGAAAATACCTCAAGAAGCCCAAAGGTTGAAGTCTCCAT  
AGTGGAAGTTTACAATAATGAC

>64

AGTCTTGGAAGTCGCCTTAGGTAAGGGGGGCGCCCTCACTGTGTTCCCCACTGCTTG  
CCTTGTCTGTAGGGCTGTGCGGCAGCGCTCGAAACTGATGGAGCTCGTTCATGGAGGT  
CTGCAGCTCAGGGCGAAGCACCCC

>65

CTGAGGCAAAGCACAGCCTCATGGCTTCATGCAACTGTTTTCTCCTCGTCGCTCCTTG

GTCCCTTGCAGCAGACCAAGCCTGCAGTGCCACCCTCCCCAGGGAGCAAACAGAGGC  
AGGAAGGGCAGGAAGGAGCCGCAG

>66

GGAGCCGGTTTTGCTTTTCCTGCCTCCTTTCTTGGTGCAAACGGTGATGGTGCGTGGCG  
GTCCTGTCCAGGTGTGTCTGGAGTGACCGGGTTGGCCCTGAGGGAGATGGCGTGATC  
AGCCGCAGCCTTGCGGCCCTGGC

>67

GCATTTCTGTTCCAGATGATCAATTTCCACTGCTACGTTGTTTTGTTTTTGTTC  
TCCCCTTAGACTGCAAATGGAAATGTGGAGGCAAAGGTTGTCTGTCTTTCCGGCGCA  
GGGACATTTCTAGTAGCCTCA

>68

GTTAGAGTTTCCAGGGTGGTGTCTTGCTGGATCCATTTCTGACTTGGTTTCTTCCTCTT  
AATCTCCCAGGGGAGTTTGAAGAGGAATCAAAGCAGCCAGGGGTGTCTGAGCAGCAG  
CGCCATCAACTGAAGCACCGGA

>69

CAGATACACCTCCCTCCCTGCCGCCTATGTGGATTGCTGCCTTGCTTACCTTGTCTCTCC  
CCAATTCCAGGACTGCTTTTTTTACTCACTGGTGTTTGACCCCGTGCAGAAGACACTTC  
TCGCTGATCAGGGCGAGATTA

>70

TTGTGAATGAAAAGACACCAACTGTTCCCCCCTGCCCTCTCCCTGTTGATGCCATTGTT  
CTTTTCCCCAGGAGAATCTGATAATCGGAACCAGCAGAAGATGGAGATGAAGGTCTGG  
GACCCAGACAACCCTCTCACAGA

>71

GGCTTAATTTCCCAGCCCACTTGGGCTTTTGACTTTTCTTCGCTTTTGACTTCTCAATT  
TCTCCCTTAGAGCTGTGGGAACCTTTGCAAGAGCCCTAGATTGTAGCAGCTCCATTCCG  
CAGCCAAGCTTGACATGAGT

>72

GTTTTAAGGAGCAGGAAGGGAGTGGTGCCAAAAGTTTCAGGTCCTCAGTTGCTCTCCA  
TCTTCCCATAGTTTCACGCCATGGATACCTTGCAAAGGAACGGCTACGACCTGGCTAA  
GGCCATGTCGACCCTGGTACCC

>73

GATGACAGGTGAGGGAACCAGGACCTGGGGCCAGATGCCAGCTCATTCTTCCTCCCTC  
TGCCCCCTTAGCTACCCTGGAAGTCACTTGCCAGCATAGTCCAGTTTATTACATGTG  
GAAAACCACAGACCGGTATATTC

>74

AGAGTGGAATTGATTCTTTTCCTTGACCAGTTTCTTGTTTTTTTCCCTTCTCCTCGCCT  
TCCCCGTTAGACTAAGCCAAACCCTAACCAGATCATTCTGTGGGTTCAAACCTGGC  
ATGAATGGGGCTGGATTTCAG

>75

GTGGCTCAAGAATCTGAGGGGCTTAGGTAGTATGCTTCTTCCCTGTCCCCCTCCTCTCC  
GTACTCTACAGCCACACAGTCTGCTCAGTGGTATGCCTGGGGCCCACCTAACATGCAG  
TGCCGCCTCTGTGCTTCCTGTTG

>76

GGGAATGGAAGAAAGAAGGGAGCCTCAGTGCTGATTTCTGCTCTCTCTCTTTTCCTATG

CTCTTCTTCTAGGAGCCACACTCAAGGGGTCATTTATCCAGACCTGAAGCTCAAAGTCT  
CTCTCCTTACACAACCAGCGCCA

>77

AGTTGGCTTCTGGCCTTAGAGGAGACCTGAATGGTGAAGCCCTTCAGAAGCTTTCTTC  
TTTGTCTCTCCAGGCTCCATTGACTTCCTAAGGCCGCCAAGACTCCATTGAAGATTCAC  
CCTCTGGTGCGGCTGCCCCTGGC

>78

AGAGAGATGGAAGTAACAAAGGGGAACTGCGTGGGAAGAAAAGGTGCGAAAGTTTT  
CTGTTTTTTTCCAGTGGCCCAGGCACCCCTGAAACCAAAAACACCTCGGGGTACCAAG  
ACACCGATCAACAGAAACCAGCTGTC

>79

TGGGCTTTTGTCTCTCATAGGAGTCTGAGAGGGTCCCTTCCCTCATTGTGCCATCCTAC  
CCCTTTTCCAGATGGCAGGGGCAGGGGTTCCTTTCTCTGCCAATGGAAGGCCTCTGGC  
TTCAGGGATTTCGTTCAAGCTCAC

>80

GTGGGGCTTCACCTGGAGGTCTTAATGTTCTCTAAGCCTTTTCTGTTTCCCACTTGCTCT  
TTCTGGCCAGGGCCCTACGGAAGGCTCTGACCCATCTGGAAATGCGGCGAGCTGCTCG  
CCGACCCAACCTTGCCCCTGAAG

>81

TATGTGTGTGTTTCGTGTACATGTGTATGTGTCTATCAACTTATCTTTTTTTAAAAAAAAT  
TTATCTCAGGAGAACCATACAGACTTTTGACTGGCGTTGAGTACGTTGTTGGAAGGAA  
AAACTGTGCCATTCTGATTGA

>82

GAAAACTTTTTCTCTGAGAAGTGAATGTACTGAGTGGTAAAAGACTTTAAATTATTTGC  
TAACTTTTTCAGAGTCAAACAGATGAAATCCCTGTATTGACATTAAAAGATAATTCTAAG  
TATGGTACCTTTGTTAATGAGG

>83

TAAAGTACTAAAAATTGCCATCTCTGCAACTCTGATACTATGACTTTATTTAACTTATTCT  
CATTTACAGAATAGAGTATGAGCCTTTGGTTGCATGCTCTTCTTGTTTAGATGTCTCTGG  
GAAAAC TGCTTTAAATCAA

>84

TAACTTAAAACTTTTCTTTAAAAAATGCTAGCATGTGAATATATATATTCACATGTTTTCT  
TCATTGTAGACAATATGTGCACTCATTTGTGGACGTCCAATTGTAAAGCCAGAATATTTT  
ACTGAATTCCTGAAAGCAG

>85

TCACTCCGTTTACAATTTAATAGCAAACATAGTAGTATATAATTAGAATATACTTTAATTAT  
TTTTACAGTTTTTACCCACCTCTTGATGAACCATCTATTGGAAGTAAAAATGTTGATCTG  
TCAGGACGGCAGGAAAGA

>86

CAAATCAAATTCTTATGTGTTCAAAAAATTACTACATTTTACTTTAAAAAATGTTTCCTT  
CCATTTTTAGCATAAGAAATTGAGTTCCGCAGTTGTCTTTGGAGGTGGGGAAGCTAGGT  
TGATAACAGAAGAGAATGAAG

>87

CTTGACATTATCTGAATAAAAGTTGCTAGTTTTAATATATTATCATACTTAAACTATTTTAT



TCTAATAGGCAAGGTCTTAGACCTATTCCTGAAGCAGAAATTGGATTGGCGGTGATTTT  
CATGACTACAAAGAATTAC

>88

TTTAAGTGACCAGATGTTTCATCTTCTATCTAGCAGTTGTGATTCTTTCTTTCTACTTGTGT  
GATTTACAGGATTAAAGACAACAACCTCCAGGACCAAGCCTTTCACAAGGCGTGTCAAGT  
TGATGAAAAACTAATGCCAAG

>89

GATCTTTGTTTCTCTATTAAAGTTGCTGTAAACTTGATTATTTACCTTGCATTCTTTTCTT  
TTTCTACAGGGATTTGAGTGAAAGGCCAAAAGAAATCAAAGTCTCCAAAATGGAACA  
AAAATTCAGAATGCTTTCACAA

>90

GCCAAACTAAATGGTTACTTAGCTGTGTTTCATTTTCTTGTTTTGTTTTCTTCTTTTTTTTT  
AAATCTAAGGGAAAGGGATGAAGAAAATCAAGAAATGTCTTCATGCAAATCAGCAAG  
AATAGAAACGTCTTGTTCTCTT

>91

CCCAAATGACAAGTGACTTTTCTTTGTTATTTCTTCTTTCTTACCTATCCATCTTAACC  
CCATTTAAGAACAATGACAAACTTCAGGATGATAGTGAGATGCTTCCAAAAAAGCTGT  
TATTGACTGAATTTAGATCAC

>92

AATCTTTTTAAAAAATGGTCATTTTTGTTTGTTAATATGATTTACTGTACTACTTTTATTA  
TTCAATAGGTCACATATCCTGGAGCAGGAAAACCTCCACACATCATTGGAGGATCAGAT  
CTAATAGCTCATCATGCTC

>93

AGTTCTTTACCTTTAAAAGAAATACCATCCCTTATCTAAATATCATTTAACCCCATTTCTT  
TCTTTGCAGATACAATCCTTATTTAAAAGGAGAAGATAACTGAGGATTTAAAAGAA  
GCCATGGAAAAACTTCCTAG

>94

CCTTTCCCGCTCCGCCTCCCCTCGCTAGGCTGCCGCCTCCTCCCCATCACCGCTCCCC  
TCGCCCTGCAGGCAAGCTGTCCTTGAGGAGTTCATCCGCGGGGCCAAAAGCGACCC  
GTCCATCGTGCGTCTGCTGCAGTG

>95

ACAAACTGCTGGTTCTGAACTTGTTAGTTTGTTCCTTAATTCTTCTCCCTCACTTTTC  
TCTTTCCAGAATCATATTCTAAGAACTCAGCCACTCAGGTATCCACCATGGTGCTGGG  
TCCTGAACAGAAGATGTCAGA

>96

ATACTAAGGATGAATTGTTAGTGTATTTTGTTCATTTTTTACTAATTTATTTTCAAATCTGT  
TAATTCAGACAGTGTCTTGAGATCATGGGAGTCTGCCAGTCTTGTTAACATCAACC  
CTGCCTATAGTAATCCCTC

>97

GATAACAGACCAATTATATCAGTAGTTCAATGGTGATGTTCAAGTTTAATCTCTTTTCCTC  
TCTTGACAGTACTCTTGTTTTAGCTTTTCGTAAACTCTGGGCTTTCACCGGACCAGGTT  
TTCTTATGAGCATTGCCTACC

>98

CAACTAAACAAACAAACAGACAAAAACTCAGTTGTTCAATGAGTGTTACAGGAGATTT

TGTTCTTCTTAGTTGCTCTGGATCCTTCTGTTGGCCACCCTTGTGGGGCTGCTGCTCCA  
GCGGCTTGCAGCTAGACTGGGAG

>99

TTCCAAATTGTGGAGGAATTTTTTAGAAATGATTAATCAGAACCGTGTCTTTCTACTGTT  
TGATGTTTAGGTCCCACGAGTCATCCTGTGGCTGATGGTGGAGTTGGCTATCATCGGCT  
CAGACATGCAAGAAGTCATTG

>100

GGAAGAGAGTGTTTTTCAATGTTTCCTTTCTTTCCGTCTCTCTGACTTCCATATCTCATC  
TCTGACCTAGAATTCCTCTGTGGGGTGGCGTTCTCATCACCATTGCAGATACTTTTGTAT  
TTCTCTTCTTGGACAAATAT

>101

GTTCCCTGGTACTATGTTACTCCCGTTTCACGTTCCCTGTAAAGGCTAATCATTGTTATGT  
TGGTATGTAGTATGTTACAGTGAAACCCAGCCAGAGCCAGGTACTCAAGGGCATGTTT  
GTACCATCCTGTTTCAAGGCTGTC

>102

AACTCCTGAAATGTCACAAGGAAACTTGTTCTAACTGGTCAAAAAGTGACTGCTGTTG  
TTATCTTTCTAGTCTAGACAGGTAAACCGGAACAATAAGCAGGAAGTTCGAGAAGCCA  
ATAAGTACTTTTTTCATTGAATCCT

>103

ATGTAGGAGAGCTCTTATTTGGTCCTTGCTTCTGAAACAAAAGTTGCTGTTGAATTGCT  
TTGGGTTCTAGGTTGAAGTCTGTACAAATACCAGCAGTCCTCATGCTGGCCTCTTTCCT  
AAAGATAACTCGACACTGGCTG

>104

AACTGCTGTTTTGGATATTGTCTGAGCAGATTATTGCCACAATCATATCCTTCCTCTTGG  
CCTCTCACAGGGTGTTGTGCTGGGATGTTACTTTGGGCCTGCTGCACTCTACATTGGG  
CAGTGGGGATCCTGGCTGCAG

>105

CCTGAACCTCCCCAAAACTTTTTTTTGTTTCCTGTTGCAGACAGTCATCTGCTCCTATGT  
TTTCTTCCAGGGATTCCTGAACCTAAAGTGGTCACGCTTTGCCCAGTGGTTCTGACTC  
GCTCTATTGCCATCATCCCCA

>106

TTAATTGTGCTGTTCTCTAGGGTGATACAAGGACCCATAGTAATCCCATCTGATCTTCTT  
TCTTTTCCAGCTTCCCTTTGCTCTCATACCCATCCTCACATTTACGAGCTTGCGGCCAGT  
AATGAGTGACTTTGCCAATG

>107

TCCTGTTTCCTTTTCTGTCTGTGGCCAAGTTGGATTATTCCATCAGTGACTGTGCTGATT  
TCTTTTACAGAGGCTGGCGGATTGCAGGAGGAATCTTGGTCCTTATCATCTGTTCCATC  
AATATGTACTTTGTAGTGGTT

>108

GGGAGCTAGCCTGTGACAGTGTTTACGCCCCCTTAATAGTAGGTGTATCTGAGTGTTTGG  
ATTTCTCCTAGCCTCAACTTTTACAGGAGACCCGTCCGTGGCCTTATTTATTCCACCCTTCC  
TGTACATCGTAGCGAATCAAT

>109

GAATCCTCCTCCCGCTGACCTCTGCCCCCTCCTATGTCCACAGCCTCTCAACTCAGCTGT

TTGCTCTCCAGGTACCCCTGGGATGGCGTGAGCACTCCCCAGCGATGGACCCATCTG  
TGACGCTGTGGCAGTTTCTGCTG

>110

GTGGCCACAGGAGAATCCTGTGGTCCCAACAATCCTTACACACCCTCTTTGTGCCTG  
CTCCTCTACCAGGTCATCCTGACCCCGCCCGAGGCCCAAACCTGAAATCGGAAGAGC  
TTAATGTGGAGCCGGGTTTGGGCC

>111

GACCAAGTCCCTTCCAGCATCCCACATCTACTTTCTACTCACTTGAGCTCCGACCACCC  
TCTCCCCACAGACCCCGGTGCTGCTGACACCCAGCTCGCTGCCTCCTAGCATTCACTTC  
TGGAGCACCTGAGTCCCATTG

>112

GTGGTGCCACTGCCCATGTGCTGCCCCGAATGTGGGCCACTGACCCGCTCCTATCGCC  
CATTCGCCCCAGGTGGTGCAAAGGATCAAGGCTGTGGAGGGGCAGACTCGGCTGCTG  
GTGGTGGACCAGGAGACAGATGAGG

>113

ACCACCGGGGAGTGGCCTCTGGAGGCGGGAGGCTGGAGCAAGAGACTGACCCTGTCC  
GTTGGGCCCTGCAGGATGTCAGTGGGCCCCTGAGGGAGCTGCGCCCTCGGCTCTGCCAC  
CTGCGAAAGGGACCTCAGGGCTATG

>114

CACACCTGGCCACGCGGCGTTGGGGGCTGTCTGGGCCCATGGCGGGGCTGATACATGC  
TGGTGGCGGCAGGTGAACGGGCAGAATGTGGAGGGACTGCGCCATGCTGAGGTGGTG  
GCCAGCATCAAGGCACGGGAGGACG

>115

GGAGGGGCCACCGTCTGGGGTGTGGGACTAGGGCTCACTCCAGACACCCACCCACC  
GTGCTCACCCCAGGATGGCAGTGCCTGGAAGCAAGATCCCTTCCAGGAGAGCGGCCT  
CCACCTGAGCCCCACGGCGGCCGAGG

>116

GTTGGATGGGCAGAGCCTGGGAGAAATGTTTTCTGAATGGCCTGGGGCTGGCATTAT  
CTTTCCTTTCAGCAAGCACCTCAAATTTGCCATGCTGGCTGGTGGAAGAGTTTGTGGTA  
GCAGAAGAGTGCTCTCCATGCTC

>117

TGAATGGCAGCCTTTTTGTTTATCCTGTTGCCCTTCCTAACATGTACTTTGCTCCTTTTC  
TCCTGGCAGAAACTACCCCTGAGTGTGGTCCCACAGGATATGTAGAGAAATCACAT  
GCAGCTCATCTAAGAGAAATG

>118

AGTAGAAGGGAAATTAGAGGGAGAAGCTGTCTGGCCTTCCTTGGGAATAACTATTCCT  
TCCTGCCCTCAGCTGCCGCTCAGCTTTGATGGAACAACGCTTATTTTGAAGTTCGAAG  
GGGCTGTCGTGTGTGTGGCCCTG

>119

TCCAGGATGCCTTTGCTTTAAAACCTTTTAAAAAGAAGTGAATGATACACCCCTTTGC  
TCATCTTGCAGTGGAACCTGGTGTGTGAGGACGACTGGAAGGCCCACTCACAAATCTC  
CTTGTTCTTCGTGGGTGTGCTGT

>120

CCCATTGGTGGAGCCCATTCCTGCTGCCCTTTTCCAGCTGGTTATCTGTCACTCTCCTT

TTCTTCCCAGGTTTGGCCGGAAGAATGTGCTGTTTCGTGACCATGGGCATGCAGACAGG  
CTTCAGCTTCCTGCAGATCTTC

>121

ATACCATAAAAAATTAATAAGGAAGGAACCCAAATTAAACTGCTAACTCGACCTCCCTT  
GTTTTGAACAGGGACAGAAATTCTTGGCAAGTCAGTTCGTATAATATTCTCTACGTTAG  
GAGTGTGCATATTTTATGCATT

>122

GTGCTCTACCTGGTCTGTGGGTCTGCTGTTGGCAGGGAGGCCTCACTGAGATTGGACC  
TTGTACTGCCAGGTTCATCCCTGAGTCCCCCGATGGCTCATCTCTCAGGGACGATTTG  
AAGAGGCAGAGGTGATCATCCGC

>123

GTATGTTATTGTGTGCTCTGAGTCTCTGACCACCTCTTCTTCCCATACACTTATGATGTT  
GTTCTGCAGTTACAAGACCTAAGTTCCAAGAAGCAGCAGTCCCACAACATTCTGGAT  
CTGCTTCGAACCTGGAATATCC

>124

TGTAAAAGTTGTACAGGTTGGGAAAGATGTGGATACTGCTTTTCCAGCTTTCTTCTGCA  
CTCTGTTTTAGGATGACCATATCAGTGGGCTATTTTGGGCTTTCGCTTGATACTCCTAAC  
TTGCATGGGGACATCTTTGTG

>125

TGTTTTGCTCTCAATAGCTGCATGCCATGGGTTGGTACCTACTCCTACCCTCTTTCCTTT  
GCTTCTCCAGACTTGTATTATTTGGCTACAGTCCTGGTGATGGTGGGCAAGTTTGGAGT  
CACGGCTGCCTTTTCCATGGT

>126

ATAAAGGGGTAGATGAGAGACCAAGTCTAACTGCAGCCCTGGGCCTGAGGCTCCGTCT  
GCTTTGCCATAGGTGCCTACGACCGCTTCCTGCCCTACATTCTCATGGGAAGTCTGACC  
ATCCTGACAGCCATCCTCACCTT

>127

TTGTTTGTGTTGGAGACTGGGAGGCATCTTTTAAAATGTGTTACTGACATATTTTGGCTT  
GTTTTTATAGAATGAAACACAGAAAACTCCAAGTCACACAAGGATGTAAAAGATGG  
TCAAGAAAGGCCCAACAATCCTT

>128

TGCAATGTAAGTTTTCTCACATACACAGTTACAATCCTCCCTTTATCAGCTCTACATTTTT  
TTTTAATAGACTGAATCTCGCTCTGTTGCCAGCCCATCTCGGCCCACTGAAACCTCCA  
CCTCCCGGGTTCAAGCGATT

>129

ATGAAAACTTTGTTGAATTAATACCTTTGTTGTGTTTTATTCACTGTATATACAATACC  
TGGATGAAGAGAGATATTTTGAGCACTATTAATAACATGCATTGGCTCAATACATGAAT  
TGGATCAATTCTGGAACCC

>130

CTTCTCTTTCTCTCACCTAATTCAACCTATTGCCAAGTATTGTACATTCTCCATGCTTAA  
AATCTCTAGGCGGTGTCCCTGAAGTATAAATCCAAAGCCTTCATGCCTGTAATCCGAGT  
GCTTTAGGAGGCCAAGGCAG

>131

ATAGTTAGAAAATAGAATTTAATGTTTCCTTTTCTCGATGAATTAATTTGTTTGTCTTCCAT

TTTAAAAGCATGCTGATCCCATTTTCAATGAAGAATTGCTTCCAGTTACTTTGTAAGTGCAGGTCCCAGCAGCTGGC

>132

GTACCCGAGCCCGGGAGAAAGTGTTTCAGTTGACCCAGGCTGAGTGTGTTATCACCTGTTTCATTTCCAGCCATGCCTTGTGTTTCAGGCGCAGTATGGGTCCTCGCCTCAAGGAGCCAGCCCCGCTTCTCAGAGCTACAG

>133

ACGTGGCGTCTGACGTCTCCAGGGAGACCCGCCGCCCTCGCTGCCGCCTCACCGCGCTTCTGTTTTGCAGGTAATCTTCAGCAAGTACTGCAACTCCAGCGACATCATGGACCTGTTCTGCATCGCCACCGGCCTGCCTC

>134

ATGTGTACATTCAAGTGTACATCCCAGAGCACACTATGGGCGAAAACACGGGCTTGGGTGTGTTTTCCAGGAACACGACCATCTCCCTGCTGACCACCGACGACGCCATGGTCTCCATCGACCCACCATGCCCCGGAAT

>135

ATAAAATAGACCTGGACACTAAGAGGAACTTCCCATATTTGGAAACCCAGTCCTGCCTGCTTTTTTATAGCTGGTGTGAGGACAAGAGAACCACAAGCCGTGGCCAGTCTGCTGAGAGACCACTGAGGGACAGACGGGT

>136

TGCTTAACCGGTTTTGGCTCTGAGAATTTTAAGGGTCATATTTACTCTCTCTTTTCTTTTTCATTCCTAGAGCATTCAAAATCAATGAACTGAAAGCTGAAGTTGCAAATCACTTGGCTGTCCTAGAGAAACGCGTGGAA

>137

TTACCAGCCTTGAGAGATCCTCCACATTCGTCCGTGGTAACCCCCTTGCTGTCTCTCTCTCTGTCAACAGTGGAAGGACTAAAAGTGGTGGAGATTGAGAAATGCAAGAGTGACATTAAGAAGATGAGGGAGGAGCTGGC

>138

TTTGCTGTGCTGAGGGCTTCACCAGACTGAAACAGCAGGACCACAGCTCATCTCTGCTCCTTCTCTCTAGGACCAACTGCCCCCTGTAAGTACAGTTTTTTGGATAACCACAAGAAGTTGACTCCTCGACGCGATGTTCCC

>139

TATCTCAGCATGCACATCACTGTACAGGCCCACGGCGCCTGGTTAACACGGAACTCCTGTCCTTTCTAGTACCTGCTCTCTCCAGAGACCATCGAGGCCCTGCGGAAGCCGACCTTGACGTCTGGCTTTGGGAGCCCA

>140

GGAAGGAAGCCAGGGGCTGGGGAGCCGGCCACACAACTGCCCAGTGCCTATCCTTCTCCTGTGCCACAGATGCTGAGCTGCCTGGAGCACATGTACCACGACCTCGGGCTGGTCAGGGACTTCAGCATCAACCCTGTCA

>141

CTGGGTGGCTTTGGGAGGAGAGGTGGGCGGGCCCAGGCACAGGGTGACTCGGACCCCCTGCCTCCCGCAGTTCTGCGTCCACGACAACTACAGAAACAACCCCTTCCACAACCTTCGGCACTGCTTCTGCGTGGCCAGA

>142

CACCCCCCTCACCCCATCCCACCTCCGAGTGAAGAGAGCAAACACCTACGCCCTGT

TTTCCAATCCAGGAGAAGTTCTCACAAACGGATATCCTGATCCTAATGACAGCGGCCAT  
CTGCCACGATCTGGACCATCCCCG

>143

GTGTTGCTCCCCCGTGCAGGTACCTGGTGAGGGCGCCTGAGTCTCCCCTCACTCTCTC  
CTTGCCTCCCAGGTACCAGATCAATGCCCGCACAGAGCTGGCGGTCCGCTACAATGAC  
ATCTCACCGCTGGAGAACCACCAC

>144

CACAGTAGGCCTCCGCTGAATAATTGTTCAAGACTATACCCGTGTTAACACGTTGTTCTC  
TCGCTATTTAGGGAATGATCACATTAATCTTGGCCACTGACATGGCAAGACATGCAGAA  
ATTATGGATTCTTTCAAAGAGA

>145

AGACCCGAGCAGCAGCAGCAGGCCCCGTGTTCTACCTCCTGTTACCTCAATTCCAAAAT  
CTCTTCTTTCAGCTGAAGATGATTTTGATAAAATGCTGTGATATCTCTAACGAGGTCCGT  
CCAATGGAAGTCGCAGAGCCTT

>146

CTCTGAGAACAGCGATCTGGTTATGGGGCATTCTGTCTCTAATGTCACTGTCTGCTGC  
ATTCCCTGCAGAGCGACCGTGAGAAGTCAGAAGGCCTTCCTGTGGCACCGTTCATGGA  
CCGAGACAAAGTGACCAAGGCCA

>147

TGTTTTTCTCCGACGTTTCCCATTGCCTTAAGAACGAGGGACTCTGAATAAATCCGTGT  
GTCTCTCCAGCTCTTCCCCATGGTTGAGGAGATCATGCTGCAGCCACTTTGGGAATCC  
CGAGATCGCTACGAGGAGCTGA

>148

TGGGAGAGAGGCAGACACTCCCCTGCTGTCTCCTGCTCCCTGACTTGGCCTTCTCTGT  
ACTCTGTTCCAGTTACAGAAGAAGACTGACAGCTTGACGTCTGGGGCCACCGAGAAG  
TCCAGAGAGAGAAGCAGAGATGTGA

>149

GATTAAAGGTGTGAGCCACCGCGCCCTAATTCTAACAAAAACAAATCAGTCATCGTTTC  
CCTTCTTCCAGGAGACTGTGCCTGAGGAAAGCGGGGGGCGTGGCTGCAGTTCTGGAC  
GGGCTGGCCGAGCTGCGCGGGATC

>150

TCCCAGTAGCAAACCCCCAGCAGGCCACTTTCCTTATTTATCACTAAAGCCCACATTAA  
CCTTGTTACAGGACAAGAGGGAGAAAGTTGTCTGAGAACTTTTGACTGTGGCCCTGG  
ACTTTGCTGTGCTCGTCATTTTTG

>151

TGAGTCTACATATGCCAGCTGAATCTCTGTGCGGAAGAAACCCTGAAGCTTCCTGTGT  
CTGTATTTACAGGGAGGAGATTGGACAGGCTGGACTCCCCATTGCTTTTCTAAAAATCTT  
GGAAACTTTGTCTTCATTGAA

>152

TGTACCCGAGCCCCGGGAGAAAGTGTTCAAGTTGACCAGGCTGAGTGTGTTATCACCCCTG  
TTTCATTTCCAGCCATGCCTTGTGTTCAAGGCGCAGTATGGGTCCCTCGCTCAAGGAGCC  
AGCCCCGCTTCTCAGAGCTACAG

>153

AATTTTCTCCGAGTTGCCTGATTTTCAAAAGAAGAAAAAAAATGTTGGTCTATATTGTC

TCCTTTTGCAGCGCACAGTGCAAAAAAATGCAAAATACGTGTGTTTAGCAAATAAAAA  
CTGCCCAGTGGACAAGCGTCGCC

>154

GGGGAGGGACCGAGGCAGCAGCTGGGCCTGGGCTCGGAAAAGCGGCGCTAACAGGG  
CTCTTCCTTTGCAGTGGTTTCGCACAGACAGTTTAAAAGGCCGGAGAGGTCGTTTGCCC  
TCGAAACCGAAGAGCCACAGGAGCC

>155

GGGGTTAGCAATTTACGGGTTATATATTTTAGAGAACCTCATTAAGTGCTTTTTTAAAT  
GAAATTCCAGTTCCAGGCGAACCCCTGACTATCAAATGAGTGGAGATGACACCCAGCAT  
ATCCAGCAATTCTATGATCTCC

>156

TCAAGTAATTAGTTGTTTAGCTTTTCTCTCTCTCTTTTTCTCCCCTCTCTCTCTTTGGTAT  
TAATTGCAGGTCCAACCCAGTGGAGGGTAAACTCATCTTTTGCAATGGGGTGGTCTTG  
CACAGGTTGCAATGCGTTCGT

>157

CTCCTTGGTTTTGCCAACTAGCTAACTGTCTTGACATTCTTCTTTTGTCTGATTATGT  
TTTCTGCAGAGAGACACGGGCTCAAGGAACCCAAGAGAGTGGAAGAACTGCAAAAC  
AAGATTGTAAATTGTCTCAAAGA

>158

TTCCACGGGGGCTGTAAGATGGCTTTTTAGGATTGGTCTAATCAGATACTCATTTCTTTT  
CTCTTTCTAGGTTTTGAAACATGAATCTTTCGCTCGTCCTGGCTGCCTTTTGCTTGGGAA  
TAGCCTCCGCTGTTCCAAAA

>159

GCAAATCGGCTTGGTGAACATGGGTTGGGTAAAGTAGACATAAAGTCCACCAGCTATATG  
TTTGCCTCTAGAATGAAGAAGGATGGAGGAGAGCAGTGTGGGAAAAGAATATGAAAA  
TGATTGAACTGCACAATGGGGAAT

>160

CTCTGTGCTGCTTCTCAGTTCTTCACCAAAATAGTCTTGCTTTTAAACATTTTATTTACTTC  
TCCTTGAAGACCAATGAAGAATTCAGGCAGATGATGGGTTGCTTTCGAAACCAGAAAT  
TCAGGAAGGGGAAAGTGTTC

>161

AATTCAATTATGGGGTACTGTATTTGTATTGGTCTTGTAATTTACAGCTTTTTTTTCTC  
CCTTTTTAGAAACAGTGTGGTTCTTGTTGGGCTTTTAGTGCGACTGGTGCTCTTGAAGG  
ACAGATGTTCCGGAAAAC TG

>162

GGTCTAGAACTAATGTTCCCCAGGAGGTAGATGGTAGTGATCAAGTCTCTCCCCCTTT  
AACTTTAAAAGGATGAAATCTGTAAGTACAGACCTGAGAATTCTGTTGCTAATGACACT  
GGCTTCACAGTGGTCGCACCTG

>163

GGTGGTAGGGTGGGTACTGTCACATGTCGCTTGGAGCTTCTCACCCCAGCATTAATTT  
TACTCTCCAGGCATTTATTTTGAACCAGACTGCAGCAGCAAAAACCTGGATCATGGTG  
TTCTGGTGGTTGGCTACGGCTT

>164

CTATTATTATTAATGGAGCCAATTTTCCCTTGATTCTTGATATAAAATGGAAAACCTGCTC

CTCTTTCAGCTGGGGTCCAGAATGGGGCTCGAATGGCTATGTAAAAATAGCCAAAGAC  
AAGAACAACCACTGTGGAATC

>165

AAATATTTCTGCTTGAGCCATAAGCGGTGATTCAGAAATATGAAACCTGACAAGCTTTG  
TTTCTTTACAGGTCACTGGATCTGAGAACTTCCCAGGGGACCGCATTCCAGAGTCAG  
TGA CTCTGTGAAGCACCCACATC

>166

CCCTGCATCTTGAGGAATGCTGTAACTTCCAGTCCTGGCCTCTCACTTAGCTTCTCCTT  
CTGGCCCTCAGGGAGACAGACGATGCTCACCCAGTCAGTAAGAAGAGTCCAGCCTGG  
GAAGAAGAACCCACGATCTTTGC

>167

GGTGAGAGGGAAAGGAGAACTGGAGCGCACCAAGGATCACGGCTCCTCCGCAATTTGG  
CTATGTCTCTCAGGCCCTGGTGAGTGGAACAATTGTTCAACATCGACTACCCAGGCG  
GGAAGGGCGACTATGAGCGGCTGGA

>168

TCAGGGTCAGATTTCTTGACAGAGTCCCCTCAAGAGGGAAATCAGACCGTCTGCTGAT  
CTCACTTTGCAGGATCCCTGCGCCGAGACACAGAGCGCATCTGGAGCCCATGGTCTCC  
CTGGAGCAAGTGCTCAGCTGCCTG

>169

CTAGGCTCTGTAGAACCTGTACACACACACACAAAAACCCAAAATGCTATCTCTCAT  
CTTCTGTCCCAGAGACTCCATACATGGTGATGAACCTGAGACAAAAGCACGGAGAGC  
TGGGCAGAGCGTGTCTCTGTGCTG

>170

TCCTGGCACTTTTCTAGGAATACCTGCCCTCCCACTGCCCATTCAGGTTCTACCTCTCCA  
TCCCTTGCAGGTATCATAATGACACATTGCTGGATCCTTCCCTCTACAAGCATGAGAGC  
AAGCTGGTGCTGAGGAACTG

>171

GTGAGGTTGAGGTACTCTTTGTGTAGGATGTAACTTACATCTTAATTTCCACACCATT  
CCCTACACAGCATCTGATGAGACTCCTTGCAACCCAGTTCCTGAGAGCTATCTTATCCG  
GCTGCCCCATGATTGCTTTCA

>172

CTTAAAAAATAAAATAAAGTAAAATACATTCAAGTCAACTGATTTGAGTCTCGAACTG  
CTCTGACACAGGAAGGTGCTGGGGATACATCAGAGGTGATGGATACTCAGGCGGGCTC  
CGTGGATGAAGAGAATGGCCGAC

>173

CTTTAAAAAAGAAAAAGAAGTGTGTGTGTTCAAGTTCACCTAATTCGTATAATTTGG  
CTCTTCGGCAGATCCTGTCTACCTTTTCATGACCAACTACAGTTTTTCATTGCAACGTCTG  
CCATCACAGTGGAATACCTAT

>174

ATCGAGTATTCCCTTGGTAGTAGAGATGTAGTACTACAGATAACTGTTTCTTCCTTTTTG  
TTTTTGATAGACTTGAAGGAAATGTGCCTTAGTGCTTTGGCCAACCTGACATGGCAGTC  
CCGAACACAGGATGAACATCC

>175

GCTGTTTTCTTTCTTTGTCAGCATATCTTTGATTGCAGCAGTAATAGTCTTAATTTATTTT



GAAAATTAGGATATTATACCATTTATTGATAAATACTGGGAGTGCATGACAACCAGACAG  
AGACCTGGGAAAATGACTT

>176

TGGTTGATTATTAATTCCATACTTTTAAGTATAAAATGTTCATTAATAGTAAAACACTACT  
TCTTTT TAGAGTAAAGAAAGAGATGTATTCTTGGTAAAGGAACACCCAGATCCAGGCA  
GTAAAGATCCAGAAGAAGATT

>177

TCTTGTTTTATGAGCATCCAGATTGACTGACTTACGTAGACTCCTTTTTTAATTGGATGTA  
TTTTTGCAGGACCTTAGTAACATTGGTCCTGCTTATGACAACCAAAAACAGAGCAGTG  
CTGTGTCTACTAGTGGGAATT

>178

TATGGAATTT CAGTATCCACATGGTGTTCCTTGTGGCTCATTGAAAGCAATCTGCCTT  
CTCTTCAAAGGGGGGAATTGCAGCAGGAAGCAGCGGAAAAGGACGAGGAGCCAAGCG  
CAAACAGCAGGATGGAGGGACCAC

>179

CTTACACAGTTGAATGCATTTGAGCTAAAGGGGGTTTTAGTTTTTTGATGTTATTTTTTC  
CTTTCTGCAGTGACCCTTTGTTTTCTGCTCAGCGCCTTCCCCCTCATGGCTACCCATTGG  
AACACCCGTTTAACAAAGAT

>180

GTTTTTGTGGCAATTGTCCCCAAGAACCTCAAATAAGTTGCAGGCCTTCTTTTAATCTC  
TGTCACCGCAGCTCCCCAGTTAAAGATCTCAGATGACCGGCTGACTGTGGTTGGAGAG  
AAGGGCTACTCTATGGTGAGGGC

>181

CTTTTTCTTCAGCAAAC TAGATTTGACTTGCAATCTTCTGACTTCCTGTGTATGTTTTTA  
TTGGGACAGGAAACCTTCAAGCTCCTTTAGGTTATGATAAATTTAGCTATTCTTGGCGG  
AGCAAAAAGGGAACCAAGTT

>182

CGGATGCGTTTTTTTCATGATGATGGAGCTGATGCTTTATTGTGCCTTTTTTTCTTTCTTG  
GTTTTCAAGGCTTTGATAAAATTCAAGAGTTATTTGTATTTTGAGGAAAAAGACTTTGT  
GGATAAAGCAGAGAAGAGCC

>183

TTCTAGAGAGTTCTTTTTTTGTTTGTTCTTTTTTACAGTTCTGAAGTAAAACCATGGTT  
TTTGTTTCAGATAATATTTTATAAAAATGGTGTCAATCAAGGTGTGGCTTACAAAGATAT  
TTTTGAGGGGGTTTACTTCC

>184

GGCTGCATGTGTCCTCAGCATCTCCGTGGCTGCTGTAGTCACCGTGTCTGTTTCTCATT  
CCTCCTGCAGATGAGTGACATGGGCTGGGGCGCCGTGGTAGAGCACACCCTGGCTGAC  
GTCTTGATCACGTGGAGACAG

>185

TAAGGGGTGAGTGATTTGAACCAGGCTGCACAAGGAGAATCAGTCTCATGCTCTGTGC  
CCCAGCTACCAGCTGGAAAAACCACCAGAGAAGGAAGAGGATCACGCCCCGAGTTT  
ATTAAAGTCAGGGAAAACCTGCGGA

>186

GGCTTGTTGGGAGGAATGAGTCCCTTTGGCAGGTTCTCGGGATCCCCTGGGTGACATGC

CTTTCTCTGCAGGAGGCACCATGCAGGAGCTGCATCTGCTCTGGTGGGCGCTTCTCCT  
GGGCCTGGCTCAGGCCTGCCCTGA  
>187  
GGGTTATTATCTTCCGCTGCCCCGCCGCCCTCCCACGCCGGCCCAGGCTGAAGTTGAC  
TCTGCCCCGAGGCCTCCAAAGACTTCATATGCTCCAGATCTCCTACTTCCGCGACCCCT  
ATCACGTGTGGTACCAGGGCGC  
>188  
CTTGGTGGGCCTCGCCCCACACCTGGCACCTCTCTGCACAGTCCCCTGATCCTGACT  
GTCTATCCACAGTTCTCTGACCATCCGCTGCTTCCTGGGCTGTGAGCTGCCTCCCGAG  
GGCTCTAGAGCCCATGTCTTCTT  
>189  
TGGGGTTTGA CTCAAATCATGGACTCCTTGGGGGCCTATTCTTCGGGCTAACTCTTTGC  
ATGTTCTGCAGGGAGCCAAACAAGCCGCTCTACACTTCGCTGGTCTGCGGCGTCCTG  
GTGGGCAGTTTCATCATTGCTGG  
>190  
CCTGGGCAGCCTTGGGGGCTCCCTGGGGCCAGCTTCCTGACACTTGCCCTACTCTGTG  
CTGCCCCCTGCAGGTGTCTGAGATGCTGCCACCGCAGAAGAAGCCCTGGGAGTCCATG  
GCTAAGGGGCTGGTGTCTGGGCGCGC  
>191  
CTCTAACTACCAGAGTCCTGAGGGCCCCAGCACCCCCCTGAGGCTCTCCCCACCTCTC  
TGTCCCCAGCAGGACCCCGGAGGCCGAGCGTCTCTCCACCTGCACTCGAGCC  
AGAGGCAGTGATCCGGGCCAACGGC  
>192  
TGAGGGTCCAGGTTGGCTTCAGAAGTACTATCTTACTTCTTCATTCTTTCCACCTCTTCC  
TTCATTCCAGGATCTAAGAGAAGAGGGAGATGAAGAGACTACAAATGATGTTCCCCAT  
ATCCAGTGTGGAGATGGCTGTG  
>193  
AACTGGGTGAGTCTTCAGTGAATGGAGTAGGAAGAGGGTGTCTCTTTTCATTGCTTTC  
TTTTCTCCCTAGTTCTGCTTGCAAAGGATCCACCAGGGTCTGATTTTTTATGAGAAGCT  
GCTAGGATCGGATATTTTCACAG  
>194  
GGTGTCTCAGAGACAGAGGGTTGGGGGTTAAGGGTTTAGAGTCTTCTCTGACTGTGTCTT  
ATGTCTTTTCAGCCTGAGGGTCACTGAGGAGTCAAGCAGATTCCAAGCCTCAGTC  
CCAGCCAGCCATGGCAGCGTCTCC  
>195  
GTGAAGCCAGCAGGTGCTCTGGAATTAAACCAGCTTTCTGCAAGCCCTGCTTCCTGGT  
CTCCCTCTCCAGGTACTGGCTGTGATCGAACTTCTCAACCCTCAGAGACTTAGATCTTC  
CACCTCACTCCCTCAGCCAAGCC  
>196  
TAGTGGCATGGCCTCCCTCTTACTCAGCTCTCCCTCCCTTTGACCGCTCCTCCTTTCCCA  
CTTCCATCAGTTCTGCAGTTGGCGGGCCAGCCCTTTGACCACTCCCTATCCGCTTCTG  
TGCCCGCAACGGGGAGTATGT  
>197  
GAGCCTGGGAGGTGAGAAAAGGTGTGGGAAGCCGGGTCAAGCCATCTAACCTGCCCT

CTCCCTGCTGCAGCCCGTCCACAGCCCCAGCCCCACGGGACTCTGTGGAGTCGGCGCC  
GTGACATCCCCAGGCCCTCTCCACA

>198

TATTGTGCCCTTGGCCCCCTGACACTGGCGACACCCCCTGGTTCTGCTCACTGTGGTGCT  
GTGTCCACAGGTGACTTTCCAGCAGATCTGTAAGGATGTGCATCTGGTGAAGCACCA  
GGGCCAGCAGCTTTTTATTGAGT

>199

AGCCTCCTGGTCTCCAGACTGTTCCCTCTGTTCCCTACCACCATCCCCCTTCCCCTTTTCC  
CTGGGCACAGATCCGCCGTACAGACGCTGTCTGGGGAGGGGGCCACCCACGGAAG  
GAGCCAGTGGTGGGAGGCACCCT

>200

GAGGGTGTGGTATGGATGTGTTGACCCCTGAAGTGGTTCTGATGACCTTTCCCTATCTC  
ACTCTCCTCAGACATCATGATGGAGGACCTGCCTGGCCTAGCCCCAGGCCAGCC  
CCCAGCCCAGCCCCAGCCCCAC

>201

ATTTTCCGCGGCAGTTTTTTGGTCCTGGGGACCGTCACCGATGCCTCCACGCACGCTTT  
CTTCCCTGAAGGGAGACGTCGCTGCGCTGGGCCTCTCGGCGGTCCCCCCCACCCGGGT  
CCCGGGCCCACTGGCCCCCGCA

>202

TCGGGGAGCTGGCCACGGGCGGCGGGGCTGGGCCCGGGGCTCCCAGGCGCTGACCC  
CCGGGGCCCGCAGGCGTGTGGCTCACGGACCTGGTGCACGTGGCGGCCACGAGATC  
GGCCACGCGCTGGGCCTGATGCACTC

>203

TCCCTTTGTCGGGCGGGAGGGCGGGGACCGGGCGGTCTGAGCCAGGCGTGCTCCCC  
ACGCTCCCGATAGGATGCCTCGACAGGCTGTTTCGTGTGCGCGTCTGGGCGCGGAGGG  
GCTTCTGCGACGCTCGCCGGCGGCT

>204

CGTGGGAGCTGGGCCTTGGCCATGGCGCAGCTGAGGGGGCACTGACGGAGCTTTTCC  
CCCACCGGAGCAGAATTCCCCTTCCCCACGGTGGCCACCACCCACCGCCCCCAGGA  
CCAAAACCAGGCTGGTGCCCGAGGG

>205

GGGGCAGGGGTGCGGGGCAGGCAGCCGGGGGGGGGGCTGTGCCTGCAGGAGACGCC  
CCGCCCCCCTGCAGCTGGTACAAGGACCAGGAGCCCCTGGAGTTCTCCTACCCCGGCT  
ACCTGGCCCTGGGCGAGGCGCACCTG

>206

AGAAAGCATTACCCCTTATATTTAACTGTGAAATATCTGATTTGAAATTATTTACTTCTTT  
TTTCCACAGCCTGGTGAGAGTCAAAGAGGCCCCAGGGGACCATATCCACCTGGACCGC  
TGGCTCCTCCTCAACCTTTTG

>207

CACACACAATCCTCAGCTAGGTGCTCCGAATATCCCAGCCTAATTTTTCTTGCTTTTG  
TTTGTATCAGGGGATGTGGCTCTAAATCAGCCGGACATGTGCGTCTACCGAAGAGGGA  
GGAAGAAGAGAGTGCCTTACAC

>208

GTTTATTCTGTGTTTAGGAACTTGTAGGGGTGAAATGCTGACCTGTGTTACTCTTTCTTT

CCATGATCAGCGTCCAGAGGACCAGAGGTTAATTTATTCTGGGAAGCTGTTGTTGGATC  
ACCAATGTCTCAGGGACTTGC

>209

AACTTCTGAATGTTTTTAAGCACTCACCAGGTTAGGTTCAAGTCCTTAAGTACCTTCGT  
ATTACTTTTAGCAGGAAAAACGGCATGTTTTGCATCTGGTGTGCAATGTGAAGAGTCCT  
TCAAAAATGCCAGAAATCAACG

>210

AATTCCTTTTGCTTGATTTTCAGACAGTTGCATCAGCTCCTTTGTTCTGTGTTCAATGTTAC  
ACTTATTTAGGTGGCTGAATCCACAGAGGAGCCTGCTGGTTCTAATCGGGGACAGTATC  
CTGAGGATTCCTCAAGTGATG

>211

TTTAAACTTAGTTTTTCATTTGTTTCATACTCAACCCACTCAAAATGAGTGTTTTTTCAAAT  
CTATGTATAGGCCTGAAGCTGCCCAGCAGGCATTCCAAGGCCTGGGTCCTGGTTTCTCC  
GGTTACACACCCTATGGGTGG

>212

GTGTAAATAAGCCACAGACTTCACGGTGCTTTGGTCTCAACAGTATCTGCCTCTGTTCGT  
TTTTATTTTAGTTTAGCAGCCACTGCTGCATCAGGGGCTTTTGTTCCACCACCAAGTGC  
ACAAGAGATACCTGTGGTCTCT

>213

AGCCTTGGATTCTTGAGTAAGTCTCACTGTGACATCAGCTAAGATGGACTTTTATGTGC  
TTCCTTTGAAGGCATCACGTTGGGTGGTTTCCATTTAGACCGAGGCCGTTTCAGAACTT  
CCCAAATGATGGTCCTCCTCCT

>214

TATTTGGTGTTTCATCATAGCCCTAATTGTTTTCTCATTGTTTCATTACCTCATTGTTTCATT  
ACCTGTAGGAAGGCACTGATCCTGAAACTGAAGACCCCAACCACCTCCCTCCAGACA  
GGGATGTACTAGATGGCGAGC

>215

AGAAAATTGTACTACAAAATACCATTCATTTATTAAAGTCATTCTGACAGGAATCTGAT  
GCTTTTCCAGGAGTTCCAGATCACATCGAGTTCACCATGAATTCCTCAGTGAAGCCA  
ACACCAAGTTCATGTTTCGATCT

>216

CAGACTTAGCATGGGTTTTAGTATTTACATTGATACAGCAATTGAATGATCTCCTTTTTTG  
ATGTTTGAAGGTTGATAGGTCAGGAAATGTTTCATCACCAGTTTCAAAGCTTCTGACTG  
AATTCAACAAATCCACTGATG

>217

TAAGTAAGTTTGGTAATATATAGTTACATAAATTACTCCTAATTCCTACTTCTTCCTTCATA  
TCTCAAAGGAATATTTAGATGCCATCAAGAAATTTTACCAGACCAGTGTGGAATCTACT  
GATTTTGCAAATGCTCCAG

>218

TTTGCAAAGCATCTTCCAGACAAGCCATTTGTAGCTTGTGTAAAAGACTCTTTTATTCTT  
TCCCTTGCAGAAAAAATTAACCTATTTCTTGATGGGACTATTGGCAATGATACGAC  
ACTGGTTCTTGTGAACGCAAT

>219

ATCTCAATAATATTATCTTTTTTGTCTTGTGTTTCACGTGTTATTTGTTGGACACATTGAT

TTATTGCAGAATACATACAAATCTGTACAGATGATGAGGCAATACAATTCCTTTAATTTT  
GCCTTGCTGGAGGATGTAC

>220

TCAATTCATTGTTAAGGTGTATTAGAGATCGACAGTTAGTCATATCAGTTTCTTTTTTCCA  
TTTGTATAGCTTGAAGAGAACTCACTGCTGAGAAATTGATGGAATGGACAAGTTTGC  
AGAATATGAGAGAGACATGTG

>221

ATTGTTGGTTATTACAGGTACAAAATTAAGAGAGGTTTTTGTTCCTTTAAAAATATCTTTT  
TTGTTACAGAAAAACAAAATTATCTTCCTTTCCAAATCCAAAAAGATGAAAACGACTG  
AGATACTTTCAAAGACAACCA

>222

TTAAAATGTTATAAAATAGACTGTTGTGTTGGCTTACTGGAATTACGAGAATTCTTTTTTC  
TCTCAAACAGCGTGCAGTTAAAAAATTTATTATGTTAACATCCAACCAAAATGTACCAG  
TGTTTCTTATTGATCCTTTGA

>223

CTAGTATTTGGCTTTAAATATTCAATGTTTAAGTGTTGTTTCTTGATGTTTGATGCTTCTT  
TGGTTCTAGGAAGGCTGGTTTCCGATAGCTGAGAATATGGGATTTCAGTGCCTAAAGAT  
TGAGAGTAAAGATCCCCGGC

>224

TATTTGTCCTAATGTTCTCCCTCCCTGTTTCCCCACCCCTCATTATAAATCTTAACTTT  
TGTTTTTCAGGCCAGAGTTACAGCAAGTTACTGTTGATGGACTGGAAGTTCTCATTCCAA  
AGGATCCAATGCACTTTGTA

>225

CAGATGCCACAGAAAGGTTCTAGCAATTTAGAAATGGCTGTAATAGCTGACTATTTATT  
ATATCTGTAGCAGTACCTTGATGATAACACTGTGGAAGCTGTGGCCTTTCCGGAAGAGTG  
CAAAGGAATTACTGCAACTAG

>226

TATAATTTGTTATAATAACTAATTTTTTTCCAAACCTAAATTTTGTTAAAAAAATTTAATCT  
TCTTTTTAGGATGGTATCGACAATGCAACATTATTCCTTATAGCAAAGATGTTGACCTAG  
GAATTTTTATACAAGATTA

>227

TTTTAAAAAAGGTTTTTAAAAATGTATTCCTTTGTTTCAGTGTGTGAAGGTTTTTCATC  
TTCCCATAGGTAGAAGACAGCTTGGAACCTATCCTTCCAGGGAAAAGATGATGTAAAA  
CTTGATGTTTTTTTCTTCTATG

>228

CACTAGCAGCTAGATTCCTTAGCTAGACCTTCTTCCACTGTTGAAGCCTAATCCCTCTGT  
TTTGCTGCAGATACCTGTTTCCGAAGTTTACACTGTGCTGGACTGAGTTTGTAGACATG  
AAGGTCCATGTACCCTGTGAA

>229

ACAGCAGAGGAGACAGTTCATCAGTTGCGTTCCCCCACAGACAGTCACAATGTTATGT  
GATGTATTTACAGAGGCGATGATATTCTCACCATCCTGACTGAAGTGAAGTATGAAGTAA  
GCAACAAGGATGACAAGAAAAAC

>230

TAAGGAACAGAGAAGGGGGTTTGAATGTGATACTTGTGTCATGCTGACTTTTTTTTTTTT

TTTTTGGTCAGTAAATTTCTAAGTGATGAAGAAAACCTTGAAACTGTTTGGGAAATGCA  
ACAATCCAAATGGCCATGGGCAC

>231

ATAAGTGGAACAATTTGGAATTTGAGTCGTAAATGGAGTCAATGATATTTTCCCTTGGTT  
TTGTCTCTAGGAGGCGATTATGCAGCCCCTTGATCATAAGAATCTGGATATGGATGTGCC  
ATACTTTGCAGATGTGGTGA

>232

GTTCAATTATTGTCTTGTTAGAGAGATGACTGGTGAAATGCCTTTTTTTATCTACAAAAAA  
ATATTTTATAGATGGCGGGTGAAAAAGTTGAGAAGCCAGATACTAAAGAGAAGAAACCC  
GAAGCCAAGAAGGTTGATGCTG

>233

GGACCACGGACCATTATGTCTTAACCTTAATTGGCATTCTCTTACTGTTGATGCATTTGT  
GTCCTTGTAGGTTGAAAAGAAAAAGAAGGAGAAGGTTCTCGCAACTGTTACAAAACC  
AGTTGGTGGTGACAAGAACGGCG

>234

GCTGACATAGCTTGCTTCTAGTAATCTGAATGGCTTATTTAAATAAGTTGGATCTATGGA  
CTCTCCACAGCCTAGATATTATCCTACTGAAGATGTGCCTCGAAAGCTGTTGAGCCACG  
GCAAAAAACCCTTCAGTCAGC

>235

AATGGTCACCTAAATTGCAGGATGATGATTCTTCCCCCTTTTCCTTGCTAAATTAATTTTT  
CCCCCTTAGGACCTCTGGTCCTCAATCGAGTTCCTCTACGAAGAACACACCAGAAATT  
TGTCATTGCCACTTCAACCAA

>236

ACTCCTTAGTTGACCTACAAGTAATTTGGTATGTGCCTGTTTTAAATGTTTGATTTTCT  
CTTTATTTAGAAATATGAGATTACGGAGCAGCGCAAGATTGATCAGAAAGCTGTGGACT  
CACAAATTTTACCAAAAATCA

>237

TTCTTGCCCGGCAGAACGCCTGCAGCCGTGCGCAAGCAGTCACGACCCTTCCTGGTCT  
CTCTTCCTGCAGGATGTACCCTGCCACATGTACCAAGTGTACAAGTCAAGACGGGGA  
ATAAAGCGGAGCGAGGACAGCAAG

>238

TGCGGGGCTGGGAGGATAGGCTTCTCATCTCCTTCCCCAAGCGCCACCGCCTCCCCG  
TGCGTCTTGACAGGAGACCTACAAATTGCCGCACCGGCTCATCGAGAAAAAGAGACGT  
GACCGGATTAACGAGTGCATCGCCC

>239

ATTGCTAATAAATGTCCCAAAGGTGGGACTTCTCTGACCTCACCGCTGACTAAGGCTCT  
TTTCCTTCCAGACTTTGGGTCACTTGAAAAAGCAGTGGTTCTTGAACTTACCTTGAA  
GCATGTGAAAGCACTAACAAACC

>240

TTTGAGTATAGTTTCCAGGTGCGCCACAGGCCTTCTGAAACGTTTTCTTCGGATTTT  
TCTTTCCCCAGGTGAGCTGTCAGGGAGAAATGTCGAAACAGGTCAAGAGATGTTCTGC  
TCAGGTTTCCAGACATGTGCCCCG

>241

TCACCTCATTCCCCAGAGGAGCCAAGAGCGGAGGCTGCCAGAGTGTCCAGCACGGT

CTCTCCCCTTCAGGAACATGACATCGAGACACCCTACGGCCTTCTGCATGTAGTGATCC  
GGGGCTCCCCCAAGGGGAACCGCC

>242

CTGGGGGCCCCGGCCTTCCTTCCAGTCCCCCGGCCCTCTGCTCAGCCATAGTGGAAGT  
GTGTCTTTGCAGACAACTATGCTTCAACACCTTCTTCAACTTCGAGGACATGCAGGA  
GATCACCAAGCACTTTGTGGTGTG

>243

CTTTACAGAGTGTCTGCCATCTGCACCCATCCTGGCCCCGCCGGCCCTGTTTCCCC  
TCTTACTGCAGCTCATCTTCCCCGACCTGGTGGAGGGGCTGGTGTGGTGAACATCGA  
CCCCAATGGCAAAGGCTGGATAG

>244

CCAGCCCCCTCTAAGCCTGCGTCCCTCTGTCTGCCCCCTCTGCATGCCTCCATCCATCTCC  
CTGGGCCTAGGAGGAGCTGGTGAACAACACAGAGTTGGTGCAGAGCTACCGGCAGCA  
GATTGGGAACGTGGTGAACCAGG

>245

CCTACTTTTCCCACCAGAGGCACCTGGCCCTGCCCCGCCAGTCCTCAGGCCCATCCTGTC  
TCTGTCCACAGTGCCCTCAGCCAGCATGACCCGCCCTGGCACGCTCCCGCACTGCATCC  
CTCACCAAGTGCCAGCTCGGTGGA

>246

GGCAGAGGAGCATTGGGGTTTTTTTTTAAATCTCTTTAATGGCCAATACTAATATAACTT  
ATTTTTTTAGCCCTAGAAAACAATCTCCTGGTCCAAGGTGCTTGAGTGGGCCGATCCAG  
CTATATCAAGAACCTTTGAGA

>247

TCACTCCACAGTGGGTGACAGCTGTGTTTTCTAGCTTAAAGTATAGTCGTATCTTTTGTG  
TTTCTATCAGAACGTGAAAAAAACCGACTGGTTCCAGGAGTGGCCAGATTCCATGCC  
AAACACATCTACAGCTCGGAGG

>248

AAGACTGCACAGGAGTCAACAACCGACATGGTTCAGCCAGGTGTGGTCATTTTCCTCT  
GCTCTTTTGTAGGGAAACGCTGTCCCAACTGTGACGGGCCTCTGAAGCTCATCCCTTG  
CCGAGGTCATGGGGGCTTCCCGGT

>249

CTGATACACCATGAAACACAGTCTAGTTAGTGTTATATCATTTCCCTTTCTACTTCCTTGTC  
TCATTTAAGTCAAAGGGAGAGCATGATCATCCAAAACAGAAACCAAGTTAGAAGCTG  
AGGCAAGAAGAGCCATGAAGA

>250

CATGGGTGCCTATGGCAGTGGTTTTGATTTGCTTAACTTATTAACACGAGCATTTCACTT  
TCCTTTCCAGTCTCTTCCAGGTGAAACACAAAGTCAGGGGAGTTTACCTTTAACTTGG  
TCTTTCCAGGAAGGCGTCCAAT

>251

GCCTAGATGTGGTACATTCGACCTCACCTATGCCTCTCCCCACCCCCTCTGGGTTTCGTTT  
TGTCTTCCAGATTGCTGGACTCGCTGAAGAGAGACTACGCAGGAAAGCCCCAGCCAC  
CCATCAAATCAGAGAGAAGGAAT

>252

TCTTAGTCTTCATTGAATTTGGCAGAGAGAGGTTGTTCTTCAAGAGGAACTGTTTCTTA

TCCTGATTTAGGTAAGAAAGTACTCATTGTCTATGCACACCAGGAACCCAAGTCTTTCA  
ACGGATCCTTGAAGAATGTGGC

>253

TACTGGGATGGTTGGGATGGGCTGTGGATGCCCACCTAGGAGTGAGAATGTTTGGCCT  
CTTCCCCGACAGGTACTCTTTCTAATCCTGAGGTTTTCAATTATGGAGTGGAAACCCAC  
GAAGCCTACAAGCAAAGGTCTCT

>254

CAGATAAACTAACTAGGAAACCTGAGGCGAGCCGCAGCCTCAGTTTCTCTTTGGTGT  
TGCCGCCCACAGTTCCCGCTGTACTGGTTCAGCGTGCCAGCCATCCTGAAGGGCTGGA  
TGGATAGGGTGCTGTGCCAGGGCT

>255

GCTGGAGGCTCAGCAACATTTCTGTCCTCTTCTGGAGTCCACACAAATGCATCTGCTTT  
CTCCCTTGCAAGGTAACTAGCGCTCCTTTCCGTAACCACGGGAGGCACGGCCGAGAT  
GTACACGAAGACAGGAGTCAATG

>256

AATCATTTAACTGAATGGTATGTAACAGGTGTAGTTTCTAATGAGTTCTTTTCTTCCCCT  
GTGGCTTTAGCATGGCACATTACACTTCTGTGGATTTAAAGTCCTTGCCCCCTCAGATCA  
GCTTTGCTCCTGAAATTGCAT

>257

GCTGAATCCCTACCAGGGCATGTCCTCAGCAAAGCCAGACCTCGTGATCCTCTTTCTTC  
TCCCCTGCTAGGATTTGGTGGCCTGGGTGACAGCTGGTTTTCTGCATATCCACATGCA  
GAGGACATTCTAACACAGTGA

>258

CACATGCACCCACGCCAAGGACCCTGAGCCTCGGCAGATCTGTGACTTCCTTCCGTCC  
CCTCTCCTTCAGCTGGCAGGCTGGGAACCACAGCGCCTTCTGGGGCATGACCCTGGAT  
GAGGGCATTCGCTACCGCCTGGGC

>259

GTGCCAATGGGCACCTGAGGGGCAGGCCAGGGCAGAGCAGGAGGCAGACAGGGCAA  
CCTTTATCTTGACAGACAGTGCTGAACCCAGGGGAGGTGCTTCCCACAGCCTTCGAGGC  
CTCTGAGAAGTGGCCCAACCTGATTC

>260

AGGGCTGGCGCCTGGGAGAGGAGGGCCAAGTCCTGAGCCTCCCGACAGCCCCTCTAT  
CTCACCCACACAGCTGTGGCATCCGATCGTGTCTCAATCCATTCTCTGGGACACATGAC  
GCCTGTCTGTGCGCCCCAGAACCT

>261

TCCGTGGGCATGGCCTGGGCCATGATGCACTGAGTCTTTCTGCCTTTGCTCCCTCTTGC  
TGCCTTTGCAGGGTGGTGTCTGACCACTGCTACCCCTTCTCGGGCCGTGAACGAGACG  
AGGCTGGCCCTGCGCCCCCTGT

>262

CTCAATAGACTCAGGCTCCAGTGCCTGTGCCAACGGGCTGAGTGGACCCTACCTTGAC  
ATCTGCCCACAGCCCTCATGGAGGTGCATGAGGACTTCTTCCTATACAAGGGAGGCATC  
TACAGCCACACGCCAGTGAGCCT

>263

TTTCTATGTGTGACTCTTTCATGGAATAACAACCTCACTGCCTCTTAACCAAAGCTGTTTT



CTCCTTCCAGTGGGTGTCAGCGTTGATGTGGTGGAGAATGAAGAGGCCAGCGCTAGC  
ATCATTGTTAAAATGACAGACT

>264

TATCCGTAAAGATGCTAGCCTGTGTTGGCTTACCTTACAGTTTATACATTTTTTTGTTCTT  
GTGTTGAAGGTGACTGCTGAGGTTGGAAAGCTCTTGGGTGAAGAGAAGGTGGATGCA  
ATTCTTTGCGTTGCTGGAGGAT

>265

CTGCATGAATTGAGCTCACCTTTTGGTTTCTTTCCTGGGAATGCTGAGCCCACATGTTT  
TTTTCACTCAGCTCTCTTTAAGAACTGTGACCTGATGTGGAAGCAGAGCATATGGACAT  
CGACCATCTCCAGCCATCTGGC

>266

GAAGATTGCATGTCCTTGCTGTCCCCCTGGCCGCCAGTGGTCACTGAGCCATCTTCTCC  
CCATTTCCAGGTATGATCGGGTACGGCATGGCCAAGGGTGCTGTTCCACCAGCTCTGCC  
AGAGCCTGGCTGGGAAGAACAG

>267

CAAGGGGGACTGGGCACCTGTTGTTAGAAAGGAGCGACATGAATGACGTGCTTATCTG  
TGTCCATTGCAGGGTTACCCTGGATACCCCGATGAACAGGAAATCAATGCCTGAGGCT  
GACTTCAGCTCCTGGACACCCTTA

>268

CTGTGAAGGTCAGCATGTGCCCAGATTTTTTGCTTTGAGAATATAAAAAAACTTTTATT  
TTCTGTTCCAGAACTTTCCATGACTGGATCACAGGGAAAAACCGACCGAGCTCAGGAA  
GCCTAATCCAGGTGGTAACCACA

>269

AGGGAGGGGCACAGGCCATGGCGGGCTCAGCGTTCTCCTCCCACCACCCACCATGCT  
GGACTCTTCCCAGGTGAGCACTTAAGCGATGCCTTTGCCAGGTGAACCCCTCAAGA  
AGGTGCCAGCCTTGAAGGACGGGGA

>270

AAAAGCGACTATGTATGAAATACCCAGCACAGTGCCCTTCCCTTACCCATCATGACCCC  
CACACCCACAGTGTGGCCATCCTGCTCTACCTGACGCGCAAATATAAGGTCCCTGACTA  
CTGGTACCCTCAGGACCTGCAG

>271

ATTAGGGAAATGCAAATCAAACTAACTCCCTACTCCAGTAACTCCCGACTTTGCCTGC  
CCAATCCCCAGGTGATGTTCCCTGTTTTCTGCGGTGAGCCAGTATCTCCCCAGACACTG  
GCAGCCACCCTGGCAGAGTTGG

>272

CCCAAATCAGATGCTGCCCATCCCTGCCCTCACAACCATCCATCCCCAGTCTGTACCCT  
TTTCCCCACAGCCCGTGGGTGCTGGCTGCCAAGTCTTCGAAGGCCGACCCAAGCTGGC  
CACATGGCGGCAGCGCGTGGAGG

>273

AAACTGCCAATTTTCTGAAATGCTCTTTAAATCCTGCTAATGGTGGCATTGTGTCTTTG  
TCACCTACAGTACATTTCTGGATTTGGGAATGAGTGTTCTTCAGAGGATCCTCGCTGCC  
CAGGTTCCCTGCCAGAAGGAC

>274

AGTTGGTTGGTGGGAAGGTGGGATGCTTTTCGGATGGGAGTAATATTGTTTATTGCATC

CTTTGTTTCAGAATAATCCTCAGGTCTGCCCCTACAATCTCTATGCTGAGCAGCTCTCAG  
GATCGGCTTTCACCTGTCCAC

>275

CTGAGCCATTCTGTGTATCACTCAGAACATTACTCTAAGGCTTGATATCTTGATGTTTT  
TCCCTCTAGCTGGCTGTATAGGATTCTACCTTCAGTTTCTCACAAGCCCTTTGAATCCAT  
TGACGAAGGCCATGTCACT

>276

GAACAGTGGAAGGCTGCCTCTTGGGCACCGTTCACATTAACCTTTCCCTCTTCTGTG  
GGTCTCTCCAGGGCCTGCATACCTTGTGTGGAGCTGGAGACATAAAGTCTAACAATG  
GGCTTGCTATCCACATTTTCCTCT

>277

CCTTTCCTGTTTCATGAAATGGTTATCACACCAAAAGAATTGCTCACCCTGCCCTGTCT  
TTTTTTGTGAGTTCCGCAGAAAGGGAACCTTCTCATTTACACCGAGTTTGGCAAGATGC  
TTGTACAGCCCAATGAGATCTG

>278

CTCTGGGCAGCTTCTTTATAACTACAGCTGTGATTTAGAGGGGCACACCAGTGTCTGCT  
TTCCATTCCAGAGAGGAATGCGGTTACGCATAGATGTCTTTGAGGAGACCAGGGGCTA  
CATCTTGGAGGTCTATGGTGTCC

>279

TCATGCAACCATGGGCATCTTTCCTATGTTTTGGAAGTTTCTAAAAGACTTTTGGGTAC  
TGTTTTCTAGGGGCCAATGGCTTGGCCAATCCTCGTGATTTCTTGATACCCATTGCCTGG  
TATGAGGATCGCCAAGTACC

>280

ACATATTGTGGGATCACAGCTACAAAAGCATTAGATGGTAAAATTATCCTTTCCTGCTTT  
TTGTGTTTAGGATGTCTCCCCGTTCAATGTTGTGGCCTGGCACGGGAATTATACACCCT  
ACAAGTACAACCTGAAGAATT

>281

ATGAAATGTGTGTCATTGTCCAGTCACTTCCCTTGTCATCATGCGTTCAGTCTCTCCTTGT  
GTGTTACAGGACCCATCCATTTTACAGTATTGACTGCTAAGTCTGTCCGCCCTGGAG  
TGGCCATTGCTGATTTTGTC

>282

GTTTAAGGGGCTTTGTGTTTTACTGGTCTTGCCTTGGATAATAAAAATAATACTGCTTCA  
ACCTTCCCAGGGAAGTGCATGAGTGAGTTTCATGGGACTCATCCGAGGTCATATGAGG  
CAAAGCAAGGTGGGTTCCCTGCC

>283

GACATCTAATCAAATGTGTTTATTATCTATCTCACCTCTTTTTTCTCATCCCCATCGTCAC  
TTCTCCAGGCATTTATGTTTGAATCATCTTTAAGTCTGGCGGTCACAAAGTGGGGACT  
CAAGGCCTCCAGGTGTTTGG

>284

GGGAAGGGGGCATACCATTTTAAGTACCAAGAAAACTTGCATAATCTCATTTTACTTT  
CTCTTTTTTACAGCTGGATTTTCTCTACGTGCTTCACTTCTCTACACAAAGAGCTGCA  
AACCAGGTCTTTGTTTTGCACT

>285

TGATTATGCTCTTTCTCTACCCATCCCCGCAAGGCAGATGTTTTTCATGCTTGAATTTTGTA

TCCCTAAAGTCAGGAGAAATCTTCTGGACTTAAGTAAAGAAGAAAAGAACCACTTTGT  
CCGGGCCCTGGATATGGCAA

>286

GAGTAGACCAAACAGAAATGAATAATTGTAAACAGAAGCAGAGAGTATTAATGTGGTT  
TCTGTGATCTAGGAAATGTTGCAAGAGCCTTCTTTCTCCCTTCCTTACTGGAATTTTGCA  
ACGGGGAAAAATGTCTGTGATA

>287

AGTTTTAAAGAGCGACAATAAGAACTCCAAACATTGTGTAAATGTTTCCACATCCCATT  
TTTTTCTGCAGGCACCGAGGATGGGCCAATTAGGAGAAATCCAGCTGGAAATGTGGCC  
AGACCAATGGTGCAACGTCTTCC

>288

CATTGCTATTACCTGGAAAAGTGAAATATTTGCAATAGTTTTACTATTCTCCTCCTTACCA  
TGTGTCTAGGTTACAGTGACCCACGGGAAAGTATGACCCTGCTGTTTGAAGTCTTCA  
CAATTTGGCTCATCTATTCCT

>289

TAGAACTCAATAATGATAGGAATATTAATTTTATTATGTTTATTAATACGTTGTCTTTGGAA  
TAATTTAGATATATCCACATTTCCATTGGAAAATGCCCTATTGGACATAATAGACAATAC  
AACATGGTGCCATTCTG

>290

ATGTGTCCACTTTTTGGTGATAACTATTTTAATATTTGTCTTTTTATTTTAATCTTCCTTT  
CCAAATAGGTGCGGAGTTTAGTGTACCTGAGATAATTGCCATAGCAGTAGTTGGCGCTT  
TGTTACTGGTTGCACTCAT

>291

TTACCACATATAATTCTTAGGTTTCTACAGGGCCTGTCTAACCTGACCTTACTCACTTTTT  
ACATAACAGGGTCCACCAGGCCCCCAGGCAGAGATGGTGAAGATGGTCCCACAGGC  
CCTCCTGGTCCACCTGGTCCTC

>292

GGCATCTTAAAAACAGATATGCTGTTTCATTATTTGCTGGTTAATTCCTTGGTTTAATTTT  
CTCTTTTAGGGTGAAATTGGAGCTATTGGTAACGCTGGTCCTGCTGGTCCCGCCGGTCC  
CCGTGGTGAAGTGGGTCTTC

>293

GGCATTTAATGTGTGCTGCCTCTACAGCCCATCACCTCCCTAATGGACCACACTGCATTT  
TCC TTCATAGGGCCTTCCCGCGTTGCTGGGGCTCCCGGCCTCCCTGGACCCCGCGGTA  
TTCCTGGCCCTGTTGGTGCTG

>294

TTCTCCAGCTGGACATAGTATTAATAATTATTTTTTTTACTCCCTCTTCTTTTGTCTTTTCA  
TTAAACAGGGCTCTGCTGGGCCCCAAGGTCCTCCTGGTCCCAGTGGTGAAGAAGGAA  
AGAGAGGCCCTAATGGGGAAG

>295

TCTGGTGGTGGGTGTGTCATTAGCTTTAGCATCCTCCTCCTCTATCTGTTTTTTTTTTTT  
TTTGAATAGGGCCCTCCTGGTAGTCGTGGTGCAAGTGGCCCTGCTGGAGTCCGAGGAC  
CTAATGGAGATGCTGGTCGCC

>296

GCAGCATCATAAGCTTGAGGTTGTGAGAATATGTTGACACTGAGTAAACTTGAAATAAC

TCTGCTTTCAGGGCCTCCCTGGCATCGACGGCAGGCCTGGCCCAATTGGCCCCGTTGG  
AGCAAGAGGAGAGCCTGGCAACA

>297

CTCTCATATGTAAACAGTATCACTGAAAGTGATGAATGGTGCAACACTTCTTCTAATC  
ACTTTTTTCAGGGGGAACGCGGTCCCCCAGGTGAGAGTGGTGCTGCCGGTCCTACTGG  
TCCTATTGGAAGCCGAGGTCCTT

>298

TCTTCTAGAGTTTGATTCTTCATTTTCTTCTTTCTCCACTAAAATTGATTTACATGTGTT  
TGACTCAAGGGTGAACCTGGTGTGGTGGTGCTGTGGGCACTGCTGGTCCATCTGGTC  
CTAGTGGACTCCCAGGAGAGA

>299

CTGAAAACATCCTAAGTTGGGGAGTAGAGTGGGTGCGAATACCAGAGCTGTAAGTGT  
TATTTCCAACAGGGTGCTGCTGGTCAACCGGGTGCTAAAGGAGAAAGAGGAGGCAAA  
GGGCCTAAGGGTGAAAACGGTGTTG

>300

ATCTTTGCTGCTCTCTTCCAGGCCCTTGGTGATTAACAGAAAGGAAATGACCTTGTACA  
TTTGCTCATAGGGTATTTCTGGCCCTCCTGGTCCCCCTGGTCCTGCTGGGAAAGAAGGG  
CTTCGTGGTCCTCGTGGTGACC

>301

AATCTTCAAGCCAACCTGTGTTATCACCTAGGGTCTTACCCATAATACTCAGTATTTTTT  
CTCTATTTAGGGACCTCCTGGCACTCCAGGTCCTCAGGGTCTTCTTGGTGCTCCTGGTA  
TTCTGGGTCTCCCTGGCTCGA

>302

TGTTTTGGAGGGGAAGGTTAGCATTCCATCGAATAAGGGGAATGTCATTTTATCTTCTCT  
GCCTGTTTAGGGTGAACCTGGTCCTCTTGGCATTGCCGGCCCTCCTGGGGCCCGTGGT  
CCTCCTGGTGCTGTGGGTAGTC

>303

TCTTTCTCTAATTCAAAAGTGATTAAAATGCAACCCAGATTGATGCTAAGCTTCATTTTG  
CCTTTGGTAGGGAGAGCGCGGTTACCCTGGCAATATTGGTCCCGTTGGTGCTGCAGGT  
GCACCTGGTCCTCATGGCCCCG

>304

GTATTTGTGGTGAAGTGAGTGCCATTTTTTTAAAACGGTAAGTCTTATCCATCCTTCTGT  
TTCTTTATAGGGCCCAAGGCATTCGTGGCGATAAGGGAGAGCCCGGTGAAAAGGGG  
CCCAGAGGTCTTCCTGGCTTCA

>305

TGAGCCCCAGGCTGCTGCTCCCTTGGTGGGATTCACCAGCTCACATGTACCTGGTGTCT  
GTCTTCCTTAGGGCCCTGCTGGTCCTTCTGGCCCTGCTGGAAAAGATGGTCGCACTGG  
ACATCCTGGTACGGTTGGACCTG

>306

TCTGCTGCCATGGATGTCTCTCACTGTAAAAAATATAAAGCCTCTCCTATCTAACTTTC  
ACCTTTGCAGGGCCCCCTGGTCCCCCTGGCCCTCCTGGACCTCCAGGTGTAAGCGGT  
GGTGGTTATGACTTTGGTTACG

>307

TTAGTTATTATTAGAATCTGTGTTCTGCTCAATGAGAAGTTTCATGATCTGAATGTTATTT

TCTTAAAAGGTTACTACTGGATTGACCCCAACCAAGGATGCACTATGGAAGCCATCAA  
AGTATACTGTGATTTCCCTAC

>308

TTTTTCATGTTTGACTCTTAGTATCTGAGTCCTTCTCCACTTAACTGGAATTCATCCTAT  
TTTCTGTAGTTTGAATATAATGTTGAAGGAGTGACTTCCAAGGAAATGGCTACCCAACT  
TGCCTTCATGCGCCTGCTGG

>309

CAAAGGTTTCAGATATTATCAGATTCAGAAATAGTGATGCTTTGTGTATCTATTTTCTTCTC  
TTTAAACAGAAAAAGACAAATGAATGGGGAAAGACAATCATTGAATACAAAACAAATA  
AGCCATCACGCCTGCCCTTCC

>310

AAATTTTTTTTAACTGGGTAAATGCTTGCTGAATTGGAAGTGAATGTCCATTCCTTTGCC  
TCTTTTGCAGATATACACTTCAGATAACTACACCGAGGAAATGGGCTCAGGGGACTATG  
ACTCCATGAAGGAACCCTGTT

>311

GGGTGTGTGGGGATAGTTGAGGTTATGGTGGGAACCTTGGGCCCTGCTGACCCTGTTT  
CCTCCTCCCTAGCCTTTATCCTCCTCTTCTACCTCGTTTTTTATGGGTCCTCACCGCCAT  
GTTACCCCTCACCATGTGGGT

>312

CCATTTTCTTCCCTCTGTGTGCAGTCCCTCATCTTATAGATCCCCCAACTTCTGCCTTTG  
TTGGCTGTAGGCTTGATGATTCGCCCCAAGACTGAGAACCTTGATGTCATTGTCAATGT  
CAGTGACACTGAAAGCTGGGA

>313

TCGGGCAGGGGACTGGGGACCTTGGAAGTGGAACATCTGGCCCCCTGAGTCTCTCCCTC  
CCACCTCTTTAGCTTACAACGACTCTATCCAAGCCCAAAAGAATGATGTCTGCCGCCCT  
GGGCGCTATTACGAACAGCCAGA

>314

AAGTCTGGTGAGCTCCTGGGTGCCTGCCATCCCTAACTGGCTAACCCCCTATCTTCCTG  
CACCCCCACAGCGAGATGAAGATGCTGAGAATCTCGGCAACTTCGTCATGTTCCCCGC  
CAACGGCAACATCGACCTCATGT

>315

TGCGGGTGGTGAGCTAGGGAAGGAGGCCGCGTTGCCCCAGGCCTAGACCCTGCACTG  
CTCTCCGGCCCAGGTGAACTACACACAGCCCCTGGTGGCTGTGAAGTTCCTGAATGTG  
ACCCCCAACGTGGAGGTGAATGTAG

>316

AATGGGCACCCTCGTTCCTGGAAAACGGTAGGCCTGTGGGTGACCAGCTTCCCTATCT  
GTCTTCCCACAGTGCGGCTGGGATCCGGCGGCCACCTGCACCTGCGTATCTCTCGGGC  
CGCCCTTCCCGAGGGGCTCCCCGA

>317

GACCCATAAACCTCTCCACACTGGCTGAGCAAATGAGAGAATGCTTTCATGTTCTCTGAT  
TTGTTTTTTCAGAGCCAAAGAGTTCAAGACACGTCTGGGGATCTTCTTCACAAATCAG  
AGCTGGGCTGCGATACTGGGAGT

>318

TTTCCTTTCTTCTTGTATTCCCTGCTGTCCCTCCAGCTGACCTATTTCCTCTTCTTTCCCA

CAACCCAGATGGAGTGGCTGCCTTCCACGCTTTCCTGAAGACAGAGTTCAGTGAGG  
AGAACCTGGAGTTCTGGCTGGC  
>319  
CCGTTGGCCCTCCCTCAGCCATGCCACCCCTCTTCCCCAACTCACCTGTGTGTGTCTCT  
CCTCCCCGCAGGTCAACATTGACCATGAGACCCGCGAGCTGACGAGGATGAACCTGCA  
GACTGCCACAGCCACATGCTTTG  
>320  
TTTGCAATTCATGGAGGGCAACTAAATACATTCTAGGACTTTATAAAAGATCACTTTTTAT  
TTATGCACAGGGTGAACAAGATGGATTATCAAGTGTCAAGTCCAATCTATGACATCAA  
TTATTATACATCGGAGCCCTG  
>321  
GATTACAGGTGTGGGCCACCGTGCCCAGCCACCGGTGTGGCTCTTTAACAACCTTTGC  
TTGTCCCGATAGGTCACCTTTGGCTCTTCAGAGATGCAGGGACACACGATGGGCTTCT  
GGTTAACCAAACCTGAATTATTTGT  
>322  
AAAGCCTCTTGTTTCGTTTCCTTGTAAGTACTGAGACCCTAGTCTGTCACTGAGGATTTGGTTTT  
TGCCCTTCCAGTGTATACTCTGAAAGAGCGATGCCTCCAGGTTGTCCGGAGCCTAGTCA  
AGCCTGAGAATTACAGGAGACT  
>323  
CCACCAGAGCCTGCTTTCACTCAGAAGGGAGATGCAGACCCATGTAATCCTCCCCGTC  
TCTGCTTCCCAGGACTCATCTGATGATGTGAGAAGAGTTTCAGAGGAGGGAGAAAATC  
GTATTGCCGCCCAGAAGAGCCGAC  
>324  
CCCTCCGCACCCACCCACCTTGCTCCTTCCCTAGACACTAACCTCCGGTGCTGATCCC  
CACCCCTACAGGAGAGCGAAGACCTGGAGAAACAGAACGCGGCTCTACGCAAGGAG  
ATCAAGCAGCTCACAGAGGAACTGA  
>325  
CCCGGGGAAAGGTGGTTAAGCTGGGGGTTGCAGTCACTACTGACAACGCCCCCTCTTC  
CGCCTGTCCCAGTCCCACCAATCACCTGCGTACAGAACGGCCTCAGGTACCATGACCG  
AGACGTGTGGAAACCCGAGCCCTG  
>326  
TGTGGGGGGCTGCAGGTGGGCATGGCTCTCGGCCCCACGCTCACCCCGGCCCCGCCCT  
CTCCCCCTGCAGGGACCCGCAGGCCCCCTGGCCGAGATGGCATCCCTGGACAGCCTG  
GACTTCCCGGACCCCCCGGACCCC  
>327  
TTCCATCCTCAGTGCCGTCTTCTGCCTTTCAATTCAGTGTCTCACTCTGACTTCTCTTG  
TTTGTCTAGAACTTTGCTCCCCAGCTGTCTTATGGCTATGATGAGAAATCAACCGGAG  
GAATTTCCGTGCCTGGCCCCA  
>328  
TCCTGCCATCCCGAGAGGCAAGGTTGGGTTTCCCAGGGTGGCTTCTGATATGTCCTTTC  
TTCTGATTCAGGGTGAAGCTGGTCCCCAAGGGCCCCGAGGCTCTGAAGGTCCCCAGG  
GTGTGCGTGGTGAGCCTGGCCCCC  
>329  
GCCGCTGCAGCCTGCCTGCCCCCTTCCCTCTGCTCCTAGGCTCACGCCCTGGCTGTCT

GCCTCCACAGGGTGCTCCTGGTATTGCTGGTGCTCCTGGCTTCCCTGGTGCCCGAGG  
CCCCTCTGGACCCAGGGCCCCG

>330

CAGCCGGCTCTGAGGCTGGCACAGGATGGCCCCTCACCACAGGCCGCCTCCTCCTCTC  
GGCCCTCTCCAGGGCCCTGTTGGTGTTC AAGGACCCCTGGCCCTGCTGGAGAGGAA  
GGAAAGCGAGGAGCTCGAGGTGAAC

>331

CCTCTTTTGGCCCGTGGCAAAGAGCCACAACTTGAGACCCTAACTGTTCTGTGACT  
TCCCCAACCCAGGGTCCCGCTGGTGAACGTGGTTCTCCTGGCCCCGCTGGCCCCAAAG  
GATCTCCTGGTGAAGCTGGTCGTC

>332

GAACCCCTGCCATTGTCCTGTCTGCCTCCCTGCTGTCCTCACTGCTGCTTTCGTGCCT  
CCCATCCTTAGGGTCCCGCCGGTCAAGATGGTCGCCCCGGACCCCAAGGCCACCTGG  
TGCCCGTGGTCAGGCTGGTGTGA

>333

TCCGTCAAGGTGCGTTGTACTTGGCCCTATCTCCAGAGCAGCCTTCACATGCCCTGTCC  
TTCCCTTCTAGGGCGAGAGAGGTTTCCCTGGCGAGCGTGGTGTGCAAGGTCCCCCTGG  
TCCTGCTGGTCCCCGAGGGGCCA

>334

GCGGGGCTTAGGGCTGTGACCCACTCTTGGGGCCCCAGGCCTCACTCCAGTCTTCTTG  
GTTGTACATAGGGTGATGCTGGTGCCCTGGAGCTCCCGGTAGCCAGGGCGCCCCTG  
GCCTTCAGGGAATGCCTGGTGAAC

>335

ACACAAGCAGAACACTATAGGTCACCTCCTTGCCCCACACTGGAAATCTCAAGCTTAT  
CCATGTCTTTAGGGTGATGCTGGTCCCAAAGGTGCTGATGGCTCTCCTGGCAAAGATG  
GCGTCCGTGGTCTGACCGGCCCCA

>336

CTGCTCCTCCCCAGGTAGTGGAACCTCCTGCCTCCTTCCCTCCATTACCGCCCTGCT  
TCCTCCCCAGGGTGCTGACGGCCAACTGGTGCTAAAGGCGAACCTGGTGATGCTGG  
TGCTAAAGGCGATGCTGGTCCCC

>337

GGGCTGACTGAGGACCCAATGATGCACCAGAGCCCCCTGGAGTCTGACAGCCCCCTCCT  
ATCCTCATCCAGGGAAATGCTGGACCCCTGGCCCCCTCCTGGTCCTGCTGGCAAAGAAG  
GCGGCAAAGGTCCCCGTGGTGAGA

>338

GAGGTGTGCAGAGCTGGGGAGGGGTCCCTGTGCTGCTGTCTGGCACCTCACCCCTGTT  
TGCTCCCAAAGGGTGCTCCTGGTACTCCCGGGCCTCAAGGTATTGCTGGACAGCGTG  
GTGTGGTCGGCCTGCCTGGTCAGA

>339

GAGATGACTCCAGCGGACTCAAGGGTCCTCCCAGACCCTATCTCTGGCCTGACTCTTT  
CTTCTCCCTTAGGGTGAACCTGGCAAACAAGGTCCCTCTGGAGCAAGTGGTGAACGTG  
GTCCCCCTGGTCCCATGGGCCCCC

>340

CTGCTGCTTCCCTGCCCCATCCTGGCCCTTCACCCGGGGCTGACCCATATTCCCCTGCT

CTCCCCGCCAGGGTGACCGTGGTGAGACCGGCCCCGCTGGACCCCCTGGTGCTCCTG  
GTGCTCCTGGTGCCCCTGGCCCCG

>341

GATGCAGACAGTGCCCCACTCGATGCCAATGGAAC TTCCGCCTGACAGTTTGTCCCTT  
TCTCTCTTCTAGGGACCCCAAGGCCCCCGTGGTGACAAGGGTGAGACAGGCGAACAG  
GGCGACAGAGGCATAAAGGGTCACC

>342

GGCCTCTCCTCCAGAGCTGGGGTTGTTTCGGGCTTCTGGCAGCCTTTCTCAAACCATTTTC  
CCCCACTCCAGGGTCCCCCTGGCTCTGCTGGTGCTCCTGGCAAAGATGGACTCAACGG  
TCTCCCTGGCCCCATTGGGCCCC

>343

CTGCTCATGGCCCTCCAGCCCCCATAGCACTTGGATGCCGGAATCCCCACTCTCTTCCC  
TCTCTGTGCAGGGTCCCCCGGCCCTCCTGGACCTCCTGGTCCCCCTGGTCCCTCCCAG  
CGCTGGTTTCGACTTCAGCTTCC

>344

ATATGTGCCCCCTACCATATGGTGCTGGCTGCTCCCTTTCCCTGACTCCATCTTGCCCTGC  
CCTACCACAGGAGAGTACTGGATTGACCCCAACCAAGGCTGCAACCTGGATGCCATCA  
AAGTCTTCTGCAACATGGAGAC

>345

CCTGGACAGGAGGCCAGCAGGACTAGAGGTTCCCGCATAGCTCACTCTTCCCTCTCTC  
TCCTCCCTGCAGTTTCGAGTATGGCGGCCAGGGCTCCGACCCTGCCGATGTGGCCATCC  
AGCTGACCTTCCTGCGCCTGATGT

>346

GGCCATAGTGCCCTCTCTCCATCACTCCCACGTGGTAATGCCCCCTCCCGTTGTCTCCG  
CCCCACCCAGAGTCACACCGGAGCCTGGGGCAAGACAGTGATTGAATACAAAACCA  
CCAAGACCTCCCGCCTGCCCATCA

>347

GCTAAGGTGGGCAGGGCGTCATATCCAGGCCCTCATTCCATTTATTCCTTTGGTTTCTT  
TTCTCCTCAGGGCCCTAAGGGGGAGCAGGGCCCCCCCCGGAATTCCAGGGCCCCAAGG  
CTTGCCAGGCGTCAAAGGAGACA

>348

CCCACCCCCACTCTCGCCACCCGGGCGCCTTCTCACCCGGCTCTGCTCCCACCCCC  
ATCCCCCGCAGCAAGGAGTACGTGGAGAACCCGGCTACCTGGCCCCAGCGGGGAT  
GCGGGCGCCCCAGGGGTTCAAGGCT

>349

AACATAGCAAAAAATAGAGGAAAAGCATTTTCCAATTCTGAAAAATGAAGATTTCTT  
TTTTGTCTACAGGAAAACGTGGAGAGAAGGGTGATCCAGGAGAAGTGGGACGGGGGC  
ACCCCGGGATGCCTGGGCCCCCAGG

>350

TCCCCACCTTCAAAAATTCTGGGCCTGAGACAAGAGGTGCCCTAATGTCTTGACTTTCT  
CCTGTTACAGGACTCCCTGGCCGGCCTGGCCAGGCAATCAACGGCAAGGATGGAGA  
TCGAGGGTCCCCAGGGGCTCCAGG

>351

GCATCGAGATGACTGGAGGTGGGAAGGGCAACATGCTTATCCCTGTAGCTACCCTGTC



TTGGCCTTGCAGATCCAAGGAGAAAGTCAGGGGCCAGTGCGCGCTACAGCCAGCGCC  
CAGTACCGCGGTGTGATGGGCACCA

>352

TTGGTGAGGAGAGATGAGGTAGAAAATGAGTGCAAGCCCGCTGGCCACTGACCCCAT  
GGCTCGCCACAGATGCCAGCATTGGGAGCCGCCTCCTAGCAGGCAGCACCACAGGT  
GCCCTGGCTGTGGCTGTGGCCAGCC

>353

GTTGTTTTCCCTTCCCCTTTTCTCCTCCCCGATACTCTGGTCTCACCCAGGATCTTCCT  
CCTCCTACAGGGACCTCTCCCAATGTTGCTCGTAATGCCATTGTCAACTGTGCTGAGCT  
GGTGACCTATGACCTCATCA

>354

AAGTAATTCTCCTGCCTTCTGGAATGATGGGTGAAGATCTTGACTGCCTTGCCTGCTCC  
TCCCTTGGCAGATGACCTCCCTTGCCACTTCACTTCTGCCTTTGGGGCAGGCTTCTGCA  
CCACTGTCATCGCCTCCCCTGT

>355

TGAATACCAGGCCAGTGAGGGAAGTGGGAGGTGGAGGTGCCCCCATGACCTGTGAT  
TTTTCTCCTCTAGGTTTCATGCCCTCCTTTCTCCGCTTGGGTTCTTGGAACGTGGTGATGT  
TCGTCACCTATGAGCAGCTGAAA

>356

CCACTAGTGCATTGGGGTGCGGTTTCGCGAACAACTGCCCACTGGCTCCCTTTTTTTTT  
TCTTTTTCTAGAGAGACTTGATAAATCGGCCTGAGAAAATAAGTAATGCTCCAGACTAG  
CTCTCTCATTTGTGAGTTCTCC

>357

TCTGTCACTTTTAGTGGTAGAAATTGTCCTTGAGACAACAGGAACTGACTACAGAAATCA  
TACTATTTACAGGGGTGCTGACATTTGAGGATGTGGCTGTGTTTTTACCCAGGAGGAG  
TGGGATTATCTGGACCCAGCTC

>358

CCATCTTACTTTGTTTCTCCTTGCTTCAAAGACCTTGGTTGATCTTTGTATTTCCCTTTTA  
TTATTCCAGATGTTTTGAACAGAGATAAGGATGAGGAGCCAACCTGTAAAACAAGAGAT  
TGAAGAAATTGAGGAAGAAGT

>359

AAAGTTTCCTCATCACGTGGCGAGACCTCCTCTACTTCAATCTTTGTCTTTTGTCTCTGC  
TGCCTTGCAGGGTTGGTACAGTAGGCTTCACTAGACTTAGCTGCAACTCAGAATTTCTC  
CTCCAGCACCTGAGTAAATGC

>360

AAATGAATTCATTATGAATGGCAATTATAGCTTAATCAAGGACTCAAAGATTCTTTTTCC  
TTCTTTCCAGGATGAACACCAGGATAAAATCTACCCCTCTTTCCAGCCACAGCCTCTGA  
TCTATCCATTTCGTTGAACCTA

>361

AAAAGTGAAGAGAGTTGAATAGTTACGTGTTATAACATAACTAATTATATATTTGCTCTC  
TATTCCACAGAATTGACTGAGACTGGAAATATGATGCCTTTTCCGTCTTTGTATCACGTT  
ACCCCAAATTAAGTATGTTT

>362

ACAGCAGCCTAACGAGTGCCCTGTCTACTTGTCTGTCCTTGTGTTTCATGTGTCTGCATG

TCTGTTCTCAGGACCTGACAGGAAGCGGGGCCGACCTACACGCGCTACCAGAC  
GCTGGAGCTGGAGAAGGAGTTCCA

>363

TGGCCCTGGAGGAAGTAGGGGGATGTGGGGGTGAGGTAAGTCTCCTTGAATGCTGTAC  
CCTGTCCATTAGAGCAGCCATGGCCAGCTCCAGGCGAGGCCTCCTGCTCCTGCTGCTG  
CTGACTGCCCACCTTGGACCCTCA

>364

GCCGGGGGCTCCCCACCCTCCTGGAGCCTGAGGTCGGGGTAGGGAGGACAGCATCA  
GTTCCCTTCTAAGGAAGGGCCCTGGACACTGCAGCAGGCAGCCCAGTCCAGACTGCC  
CATGGCCTCCCAAGTGATGCCCTGGC

>365

CTAGGGAGGGTATTAGGGGAAAGGGCTTGAGGGCCACAGTAAACTGGACAAGTTTTT  
CTGCCCAGCCTAGGCTGCCACCTGTAGGTCACCTGGGCTCCAGCTATGTGGCTGCCTCT  
TCTGCTGGGTGCCTTACTCTGGGC

>366

GCTCCCAGGAAGAAGAGGGAGCTGTGGGAGTGCCTCACCTACCCCCAGCATCCTTTTC  
ATCTCCCCACAGGGCTTTTTGGTCTGGTGAATAATGCTGGTGTGGCTGGTATCATCGGA  
CCCACACCATGGCTGACCCGGGA

>367

AACCCATGTCCCTCAAAGTCCCCTCCCTATAGGGCAAGAACCCAGCAACTTCGCTCTG  
CCCCGACTCTAGGCGGGATGTAGCTCATTTTGGGATACGAGTCTCCATCGTGGAGCCTG  
GCTTCTTCCGAACCCCTGTGACC

>368

CGAGCCTGACTCCAGCAGGCCTGCCTTGGGGCTGGGGCTGGGGTGGAGGCCAGCCAG  
TGTCTCCCATAGTGGCCGAGAAGACCAAGGAGCAGGCCAACGCGGTGAGCGAGGCT  
GTGGTGAGCAGCGTCAACACTGTGGC

>369

CCTGGTTGCAGGGCAGCTAGGGGTCTCTGCATTCTCCACATGGTCTCATGCCCCCTTTT  
GTCCCCTACAGGAGGACTTGAGGCCATCTGCCCCCAACAGGAGGGTGTGGCATCCAA  
AGAGAAAGAGGAAGTGGCAGAGG

>370

TCAGCCCACTCAGGGTGGCCCATTAAGGCTGGGGCCTGGAGCTGGGTGTGCAGGTCAT  
TCTCTCTCCAGGCCAGAGTGGGGGAGACTAGAGGGCTACAGGCCAGCGTGGATGA  
CCTGAAGAGCGCTCCTCTGCCTTGG

>371

CGGCCAAGCTGCTTGTACCTGTGAGTGCTTCCAAGGAACCGGATGTGGGCTCCCCCA  
CCCTTACCCCAGCATCTGGCACAGCTGAAGGCAGATGGAAATATTTACAAGTACGCAAT  
TTGAGACTAAGATATTGTTATCA

>372

TGAATTTGAATGACTGATAATTTAATTTATTTTCAGTCAATTGTTACGTATGTTTTCTTTTT  
CTTCCCAGGACATGGTGACCCAGGCATCTCTGTATCTGTTTGAAGCTACAGGAAAGCG  
ATTTTATTTCAAAAATGTTG

>373

CTCCAGTACGAATATGGTTAATTCATTTGCTGAACTTTGTGATGATAAAAACTTTTTCT

TAAATTTTCAGGCTGATGTTCTGGTTGCTGAGTCTACTCCTCCAGGTAATGATGAACCCT  
ACACTGAGCAGATGGGCAACT  
>374  
TTTCTTCCAGTGTGAGAAGGTAATTTTGCCATTCTTATTGTAATCAGTTTTTTAAAATACT  
TTCTCACAGGTAAGGCATTTGTCCATGAGTGGGCTCATCTACGATGGGGAGTATTTGAC  
GAGTACAATAATGATGAGAA  
>375  
AACTGAGCATAGACTCTGACCCTTTGAAATGACGACATCACCTAAACATCTAACCTTCC  
TATATTTTCAGATGTTTACGAGGTATTACTGGTACAAATGTAGTAAAGAAGTGTCAGGG  
AGGCAGCTGTTACACCAAAAAGA  
>376  
GTCTAACAAATTATTAAATATTCTACCACATAGTTTACCATTATCTATATAATTTTCATTGAC  
AATTTTCAGATAGTTGAATTCTGTACAGAACAAAACCACAACAAAGAAGCTCCAAACAA  
GCAAAATCAAAAATGCAATC  
>377  
CCTATGGCCTTTTTCTGTTATTAGTCTTTCCATCTAAACGTAACCTGTTTTTCTTTTGCTTC  
TCCATTTAGACTGGTAACCGCCTCAATCGACTGAATCAAGCAGGCCAGCTTTTCCTGCT  
GCAGACAGTTGAGCTGGGGT  
>378  
TAAGCAGAATTTTCATAAACACTTTGGCCACCCTAAGTCTGATAACTCGTGCCCTAAAT  
TCTGTCCTTAGGTGATTAGGAAGAAATATCCAACCTGATGGATCTGAAATTGTGCTGCTG  
ACGGATGGGGAAGACAACACTA  
>379  
AACAAACAGCTAAAATGTTGCAAATAGTTGCTTTCTGGAAAATAATTTCTGAAAATGTAA  
TTGCATTTTAGGAGGTTTACAGACATATGCTTCAGATCAAGTTCAGAACAAATGGCCTCA  
TTGATGCTTTTGGGGCCCTTTC  
>380  
GGGCAGAAGGGAAAAGACCATGTGATGGGAGCTGTATTCTCCAGAAAGTAAGAGCTG  
TTTTTCTTAACAGCTTGAGAGTAAGGGATTAACCCTCCAGAACAGCCAGTGGATGAAT  
GGCACAGTGATCGTGGACAGCACCG  
>381  
CGTGACATTGAAGTCAGGTCTGTGTACCTGAAGTTATTCATTGGAAATGTTTACATGT  
GTTTTGGTCAGGTTGGCACTTGGAATAACAGTCTGCAAGCAAGCTCACAAACCTTGAC  
CCTGACTGTCACGTCCCGTGCGT  
>382  
ACATATGAGTTGGAAATATACAAATACCCCTCCCGTTACCTATTTATTAATTCCTTCATTC  
TTTATCAAGGTGCTGATGCTACTAAGGATGACGGTGTCTACTCAAGGTATTCACAACCT  
TATGACACGAATGGTAGGTA  
>383  
AAGAAAACAGACGGAGGTGTCACCATTTAGTGATGTTGCTTACCATATTTGAGTATTT  
TTTTAATGCAGATGAAATACAATGGAATCCACCAAGACCTGAAATTAATAAGGATGATG  
TTCAACACAAGCAAGTGTGTTT  
>384  
AAGCTCTACTGCTTAAGAAGTTTCTTTAATATTTTCAGAATTAAAGTCACATTCTTCTTTT

TTCTTTTCTAGCTCACAAGTATATCATTCGAATAAGTACAAGTATTCTTGATCTCAGAGAC  
AAGTTCAATGAATCTCTTCA

>385

GGAGACAGAGGTGGGCAGCTGTGGTCTCCCCTCTGCTTCCCTGGCTCAGCTTGCAATG  
TGATTCCTTCAGAAGTTCCTGAGTGGGTGAACACCCCATCCACCTGCTGCCTGAAGTAT  
TATGAGAAAGTGTGCCAAGGAG

>386

AGAGGTGGGGGTGGGCACCGGACTCCTGCCCAGTCTGCAGCCCATGACGGTCTAATT  
CTGCCTCTGCAGCTTCGTACCAAGAGGAACCGAGAAGTCTGCACCAACCCCAATGA  
CGACTGGGTCCAAGAGTACATCAAG

>387

GCTCATTTTTCTGTGTGTCATTTGGATGACAAAAATATGCTTATAAGCTTTCCTCTTTT  
GTTTTTATAGGAGGAAAGAATGGAAATGATTTCTGAAAGGCCAAAAGAGAGTATGTAT  
TCCTGGAACAAAACCTGCAGAGA

>388

TATATAATTTCTTAAAAATTTATATAATAAACTGTAGATTTCTCATGCTTATGTATTTCCCTTT  
TCTTTAGTGTGTGACTCCACCTTACAGTCCTTCTGACTTTGAACCTCTCAAGTGTCAA  
ATCTGATGGCACCAGCGC

>389

TTAGACAGAATTGAACATATAATTTACGGCAATCTTATGCATAATAATGATTTGTATGTCT  
TTGTTTTAGGAGAAAAGCCTTTCAGCTGTAGCTGGAAAGGTTGTGAAAGGAGGTTTGC  
CCGTTCTGATGAACTGTCCAG

>390

GTACCAGGCTACAGGACCTAAGCTAATCTCCCACTCCTGCTGTCCATCCATTATGTTGCT  
TTGTCCCCAGGTGGTAGGTGAGTGGAAATTCAGCAGGATTCAGTGTGACATCTTCGTC  
ACTCTGGACGTCATGATGTGCA

>391

GTGTGTGCATATTGTGGAGTGAGGGGTCCCTGGGCCTGCACCCCAGATTAGGGTCCC  
CCGCCCTTGCAGGTACACAGCTGTGGCCATGCCCATGCTGTACAATACGCGCTACAGCT  
CCAAGCGCCGGGTACCGTCATG

>392

ATGGGCTCTTGTGGAATTATGGCCGGTGGGCCCCTGACTCCCTGCCTGCCCCGGGCTCT  
CCCTCCCCCAGACCAGAACGAGTGCATCATTGCCAACCCGGCCTTCGTGGTCTACTCC  
TCCATCGTCTCCTTCTACGTGCC

>393

GCACTTTGGGTTTCTGTCCCCCTCCATCCCCACCACTTTGTGTGACCCATGTGCTGGC  
TCACTCCACAGGGCAACTGTACTACCCCGAGGACATGAAACTCTGCACCGTTATCAT  
GAAGTCTAATGGGAGTTTCCCAG

>394

CCAGTGAGATGGGTGGCTGATGCCTGGGAACTTGTCCGGCTTTACCCAGAGCCCTCTG  
CCTCTGGTGCAGGAGGCTGCCCGGCGAGCCCAGGAGCTGGAGATGGAGATGCTCTCC  
AGCACCAGCCCACCCGAGAGGACCC

>395

CTGGGTGTGGGTGTTCCCAGCCGTGCCTCCCCGGCTCTGGGGACCAGCCTGACCATGC

CCTCTCCCCAGGCGTGTTTCATCATCTGCTGGCTGCCCTTCTTCATCACACACATCCTG  
AACATACTGTGACTGCAACAT

>396

GGAGAAATAGTGCTGCCTAATCTGCTGGCGTGGGCAGTGGGCACCATGAGGACCCTGT  
TCTGTGTTGCAGTTTTACCATGGAGCAGCTGAGCTCAGCAAACACCCGCTTCGCCTT  
GGACCTGTTCTTGGCGTTGAGTGA

>397

GGAAACACCAAGGAATCACTTTATAGTTTCAAATAAATGGTTGTAGAAAGAAGATTTT  
CTTTATTTTAGACTTTCCATTTCAACACGGTTGAAGAGGTTCAATTCAAGATTCCAGAGT  
CTGAATGCTGATATCAACAAAC

>398

GGATTTTAGAAAACAATTTCTATATGTAGTAGGAGTTATATATATATTTCCTTTTCTTTTT  
TTTAATAGGAGTTCTTGGTTTCGACTCAGAAAACATATGGTGCTGACCTGGCCAGTGTG  
GATTTTCAGCATGCCTCTG

>399

TAATATATTGTCAGTTCAAATTTGGAATTCCGATTTGGATTTTTTTTACGCTAACTTGATT  
TTTTTTTAGGAAAAATTCCGGAACGTGGCTTCGGGCATGGTTGATAACATGACCAAA  
CTTGCTAGTAAATGCCAT

>400

CTGTACAGAGTCATGCATTGCTCTAAAAGAATGCAGAGAATAATTTCAGTGATTTTTTA  
AAACTGTTTCAGAAAGACAGAAAACTGTGAAAATGATGTATCAGAAGAAAAAATTTG  
CATATGGCTACATCGAGGACCTTA

>401

AATAATACTTTATTGCCTTACTTATGTAAAATTGATATCACTTCCTCTTTCGCCTCATTTTT  
AATTGCAGATTGAGGAACAGTTGACTTTGGAAAAGTTGCATGAGTGGACTAAACCTGA  
GAATCTCGATTTTCATTGAAG

>402

ATGAGCGCGGCGAGGTGGGGGTCTCTAACGGAGCATCTGTTTTAACCCGCCCCTGCAC  
ACACCCAGCAGATCCTGGCCATGAGAGCTCCGCACCTCCACCTCTCCGCCGCCTCTG  
GCGCCCGGGCTCTGGCGAAGCTGC

>403

AGCCCAGCTCCAACCCCAAACCCAGACCCTGCCCTCCGTGCTTTGATTCCGTCCCCTTT  
CTTCTCCCCAGCCGAGAGGCGGCGCTGCTCCCCAAAACGACACGCGCTTGGACCC  
CGAAGCCTATGGCGCCCCGTGCGC

>404

GCTTCACTGCCCACCTGCTTTCCCAGTCCCTGTGAAGGGTTTGCCTTCACATGCCTCTT  
CCTTCCCCCAGGCCACTGTGGGCTCGAGTAGGGGATGACCACCTGCTGCTTCTTCAGG  
GCGAGCAGCTCCGCCGGACGACT

>405

GTATCTGGACTCCTGGCTCCCCAAGGATTGGGGGCTGGACCCAGGGATTACTGGCATAT  
TCTCCCTTCAGTGAAGTACAACAAGGGCCTGACCTGCTCCAGCATCACTATCCTGAGC  
CCTAAAGAGTGTGAGGTCTTCTA

>406

GCCCCAGATCCCAAAGTGACAGCTCTCACGTTGGCACATTTATTTGATCTCTCCTTTCT

GCCACCCCCAGAGTGACTCTGGAGGCCCCCTGGTCTGTGACGAGACCCTCCAAGGCA  
TCCTCTCGTGGGGTGTTTACCCCT

>407

GCAGGGGTGCGGGCCCTCCAGCATGAATGTGCCCGCTCAGCCGACGTCTCCCTTCCCG  
GTCTGACCGCAGGTATCTGGCCATCCGCTACCCGCTGCACTCCCGCGAGCTGCGCACG  
CCTCGAAACGCGCTGGCAGCCATC

>408

ACGGAGGTTTTGAGGCGGGGTTGCAACTCCAGGGGTGAGAGCTGACGAACTCTCTTC  
TCCCCACCCCCAGGAGCTGGACACCCTATGAAGCCTCATCGCCTGGCATTGACCCATA  
GCCTGGTCCTGCATTACGGTCTCTA

>409

AGTATGGGTGGTCTGAGCCTGTGGAGTGGGGCTGACCCTGCCTGGGTTCATCTTGTGTA  
TCCATCCCGAGGTCTTCAAGCCATAACCAGGCCTCCAGCATGACATGTGCCGCTTCCAC  
TCCGAGGACTACATTGACTTCC

>410

ATGGGGAGGGAGATATGGGAAGGGCCCAGACAGAGGCAGGAGGGTTCCAACTTGTTTC  
CTCTTCCCTGCAGCCCAGTGTTTCCCGGGCTCTTTGAGTTCTGCTCGCGTTACACAGGC  
GCATCTCTGCAAGGAGCAACCCAG

>411

CCCGGTGTTTGAGAGGAGTGGGTGTTGGGGGGTTCACCTTCTAGCTCAGACCCTGGCTTTG  
GCTTCCCTCTAGGTACCACCCTCGGGTGCTCTACATTGACATTGACATCCACCATGGTG  
ACGGGGTTCAAGAAGCTTTCTAC

>412

AGATTGGGGCTGAAACAGCTGGGTGTTGTGGGTGCTTCCCATGTGTGGCTACCACCACCC  
ACTTCCCTACAGGTGACATGTATGAAGTCGGGGCAGAGAGTGGCCGCTACTACTGTCT  
GAACGTGCCCCTGCGGGATGGCAT

>413

CTTTTTCTTTTGTTCCTGTCTCCCCATCCCCTTGGGGTGCCAGGTGCCCATCTTTGGC  
CCTCTCCCAGGTTACAAGCACCTTTTCCAGCCGGTTATCAACCAGGTAGTGGACTTCTA  
CCAACCCACGTGCATTGTGCT

>414

CAATACCTAAAGGTATTTACCTTGTCTTTTGATAACCTCCTCCACATCTTCCTCTGGTTC  
CTTTTAACAGGGAATGCGTTGAATATGTCAAGAGCTTCAATATCCCTCTACTCGTGCTG  
GGTGGTGGTGGTTATACTGTC

>415

GAAAAAGATTGGGAAGTCTTGTTAGCTGCCTTTCTCAGTCTGAGCCATACTTTCTCCTC  
TCCTCCCCAAGAATACTTCGAGTACTTTGCCCCAGACTTCACACTTCATCCAGATGTCA  
GCACCCGCATCGAGAATCAGAA

>416

GCAGCTAGGAGATTCCATGTCCTGGGAATCTCTGGAAACTGCTCACTCTGTATTCTCTCA  
TTTCCAACCAGTATCTGGACCAGATCCGCCAGACAATCTTTGAAAACCTGAAGATGCT  
GAACCATGCACCTAGTGTCCAGA

>417

TTGGAAGGGTGCTGGGAGAAGATTAGAACTTAGAGTGAGATCCTGACCTCTCTCCC

CTTGCTTTGCAGGCCAGAGGCACCCAATGAGTTCTATGATGGAGACCATGACAATGAC  
AAGGAAAGCGATGTGGAGATTTAA

>418

CAGGTAGGGGATGGCCCTGCCTCTTGTCCAGCCAGAGCAGCAGCAACCTCTCTTTTCC  
TTTCCCTTACAGGAAGCTGCACAGTGGGATGAAGACGTACGGGTGCGAGCTCTGCGG  
GAAGCGGTTCTGGATAGTTTGCGG

>419

TGTGGCCCAGGACCTCCCCGCTCACCAGTGGACTATTGCTCTAGTGGTAACTGCCTCTC  
CTTCTTTTCAGCGGGTGCCAAAGCCTTTGTCTGTGATCAGTGCGGTGCACAGTTTTCGA  
AGGAGGATGCCCTGGAGACACA

>420

CTCCAGATGGGTAAAGAATGCACCTTGTATTCCACCTTTCTGAGGCACCCCCTCTCCT  
GTCTCCACAGGCACTGACATGGCCGTCTTCTGTCTGCTGTGTGGGAAGCGCTTCCAG  
GCGCAGAGCGCACTGCAGCAGCA

>421

TGTGCCCTACTGTCCCCTGAAGAGGGGGCAGGGAGAGGCCAAAGGCCTGATCCAGCCC  
CTTGTCTCCACAGGCGACCACCCCTACGAGTGTGAGTTCTGTGGCAGCTGCTTCCGGG  
ATGAGAGCACACTCAAGAGCCACAA

>422

AGGGTGACATGGTGCCCTCACTGCCTTCTGTCTGTCCTCACTTTCTCCTGCCCTGTCCC  
TCCGCCCTCAGGTGAGAAGCCCTTTGAGTGTAAGCTCTGCCACCAGCGCTCCCGGGAC  
TACTCGGCCATGATCAAGCACCT

>423

GGGACTCTGGGAGTCTGGCCAGCCCCAGCTGCCGTCTTAGCTGGAGGGGCTCCCTCCC  
TTCCTCTTGAGGTGCTCCAGAAAGCAGGAGTTGAAGACCTGGGTGTGAGGGACACA  
TACATCCTAAAAGCACACAGCAGA

>424

GTCATTCTGGTGCCTCATGGCTCTGCCTGCCAGCTGTGCCCCGAGGTGCTTTCTCGCG  
TCCTTCTACAGGTTCCCAGAAGACAAACCCCTAGGAAGACAGGCGACCTGTGAGGC  
CCTAGAGCACCACTTAAGAGAAG

>425

TTATTCCCCTCGTCCTCCTCCTGTTTTTCTTTCTCATCCTCATCCTCCTCTCTGCTTCTGC  
GTTCTCCAGGGGACAAGGATATGCCTACTGCTGGGATGCCGAGTCTTCTCCAGAGTTC  
CTCTGAGAGTCCTCAGAGTTA

>426

AGACTCATTTTCTTTTTTTGTCTCTTCTGTCTCTTGTGTGTCTGTGTGCCTGTACATACCC  
CTCCCTCAGACTCCCGAAGCCCAGACAGCTCCTCCCCAAATCCCCTTCCCCAGGGAGT  
CCCTCCCCCTTCTCCTCCTGG

>427

TTCCATCACTTCTGTGACATTCTGCTTCCCAATAAGTCTTCCTGTGACTTCCCTATTTCC  
CCCATCCCAGATTAACTCAACAGTGTCACTCCCTGGGGGTGGGTCTGGCCCCCCTGAA  
GATGTGAAGCCACCAGTCTTAG

>428

ATTGGAAACAGACTAAATGGTGAAGGTGTCTCCATGCAACCTTCTTATTGCTCCTCCCC

TTTCCCTGTAGGCAAACACTACGGGGTTTACAGCTGTGAGGGTTGCAAGGGCTTCTTC  
AAACGCACCATCCGCAAAGACCT

>429

GGATATTTGTGGAACCCCTTCATGGGTGGATGCTGACTGTACATTTTTTCTGTCCCCCTT  
CCCCCTGCAGCGGTACAGGAGGAGCGTCAGCGGGGAAAGGACAAGGATGGGGATGG  
GGAGGGGGCTGGGGGAGCCCCCGA

>430

AAAGCCTCTTACAAGGGGGCTCCCAGCATATCTCAAAATCTTCCATAACTCTTACCCCC  
GTCCCCTGCAGCCAAATGACCCTGTGACTAACATCTGTCAGGCAGCTGACAAACAGCT  
ATTCACGCTTGTTGAGTGGGCGA

>431

TCTCTTCCACTGATGTGCTTTGAATCCCTTGGCCTGATTTCTGGCTCCTGACCCTTGCTG  
CCCCACCCAGGCTGGAATGAACTCCTCATTGCCTCCTTTTCACACCGATCCATTGATGT  
TCGAGATGGCATCCTCCTTGC

>432

GCTATAGGCTGGTCCGTGTCCAAGGCTGGCTGAGCTGTGACCTTTGAGTGACCTGCAG  
GTCCCTCTCCAGGGTGCTGACAGAGCTAGTGTCCAAAATGCGTGACATGAGGATGGAC  
AAGACAGAGCTTGGCTGCCTGAGG

>433

CACATCTGCATGGCCATCCTGATTTGGTTTGTCTTCATTTCTCTTCCTCCTCTCTTCCCTG  
CCATCCCAGATGCCAAGGGCCTCTCCAACCCTAGTGAGGTGGAGGTCTTGCGGGAGA  
AAGTGTATGCATCACTGGAGAC

>434

GTGCTATGAGGATGTGTTTCAAGGGCCCGTGTGCTTCCAGCTCTCAATCCCCTTCTCCCAC  
CTCCACCCCAGGTTTGCCAAGCTGCTGCTACGTCTTCCTGCCCTCCGGTCCATTGGCCT  
TAAGTGTCTAGAGCATCTGTTT

>435

GCCTCTCCTCTGACAGGGCCTCTCATCATGCCTATGCCTACTTCACCTCTGACTCCTGCC  
TTGGTTACAGGAGGTGGAGGCCGAAAGGTCGCACCAAGAGAGAAGCTGCTGCCAAC  
ACCAACCGCCCCAGCCCTGGCGG

>436

TGAGTGGGAGAGGCAGAATTAGAACCCAGATCTCTGTCCCTTTTACCACCTGCTTTTCC  
TCACCCCCCAGATGAGGCCAGACCATGGACACTACACCCAGCAATAGAGACGGGACT  
GCGGAGGAAGGAGGACCCAGGACA

>437

GCCTTGCCCCCTCCGGATTCAGGCCGATGGGGCTTGAGCCCCCCTGACCCTGCCCCGTG  
TCTCCCTCGCAGCTGGGCGCCGTGTACACAGAAGGTGGGTTCGTGGAAGGCGTCAATA  
AGAAGCTCGGCCTCCTGGGTGACT

>438

GGGACAGGGGACCGGCTGGAGACAGGGCCAGGCGGGGCGTCTGGGGTCACCAGCCG  
CTCCCCCATCTCAGTCTCCCGGGACCTGCCCGTTATGATCTGGATCTATGGAGGCGCCT  
TCCTCATGGGGTCCGGCCATGGGGC

>439

TGATCTCCCCCTCCTGGAGGCCAGGCCTGGGCCACTGGTCTCTAGCACCCCCCTCCCCTG



CCCTGCCCCCAGGTAACTATGGCCTTCGGGATCAGCACATGGCCATTGCTTGGGTGAA  
GAGGAATATCGCGGCCTTCGGGGG

>440

GAGGCAAGGGGCGGCTCAGGGGAACTGGGAGGTACAAGAACCTGCTAACCTGCTG  
GCTCTCCCACCCAGACCCCATGCTGCACTATGTGGGCTTCGTCCCTGTCATTGATGGAG  
ACTTCATCCCCGCTGACCCGATCAA

>441

GCAGGTGGAGAGCAGGGCTTCAGCCCCCTGGGAGTCCCCAGCCCCTGCACAGCCTCT  
TCTCACTCTGCAGGGACCCCAACATGGGCGACTCGGCTGTGCCACACACTGGGAAC  
CCTACACTACGGAAAACAGCGGCTAC

>442

CCTGGGGAGGGTGGGATGCTGGGTGGGCTCTCCTTGCCTGCTTACTTTTCGTCCTCCTTT  
CCCCTGCCCAGGGGTGTGGGGTACGGATACAGAGGAGCGGCTGGTGGAGCATCTCCT  
GGATCCTTCCCGCTACAACAAGCT

>443

AGTTCGTTTCCTTAACCTTGAGCCCCACCCAGGGCACAAGTTGGTACTGCCTCCCTCTC  
TCATTTCCAGGAGTGGGAAGATTATCGCCTCACCTGGAAGCCTGAAGAGTTTGACAA  
CATGAAGAAAGTTCGGCTCCCTT

>444

AGGGGCTGGGTTGATGGGTAAGGAGGAAGGAACGCTTAGGCCAGGGCTGACTGTGCC  
CATCCTTTGGCAGTGCTGACGGCATGTACGAGGTGTCCTTCTATTCCAATGCCGTGGTC  
TCCTATGATGGCAGCATCTTCTGG

>445

ACCCGCTTATACTCGTTTGTCTCCCATCCTGCATCATGTGACCTGGGCCTCCTCCGTCTC  
CTCCATCCAGGTGAGTGAGGACTGGAAGTACGTCGCCATGGTGATCGACCGCCTCTTC  
CTCTGGATCTTTGTCTTTGTCT

>446

AGTGGCAGGGATCCTGGCTGTCTCTGCTGTGTCCCTGCCTCTGTACCTGAGTGTTTCTA  
ATGACTTGCAGGTGGAGCTGGAGACCTGGTCTCTCTAGGGCCTACCCTGAGCTACCA  
TCTGAAGGAGAGTGCCATCATCC

>447

TCCCTGTAAGTCTCTCCGCACTCTTCCCCACACCCACCTCCACTCCAGCCCTGATTCTG  
GCCTCCACAGCCCAGCGCAGACTGTCCGAAGCTCTGAAAAGGCTACGTTCTGGGCCT  
AAGTCTAAGAACTGGGTCTACAA

>448

ATGAGGTGGCTTGAGGGGCAGGGAGGGGGGCGCAGGGCTCTGCATACCGGATTTCCC  
ATCCCTGTTTCAGATCCTTGAGAGTTTTGCCCCTGAGCACAAGGAGCCCACCCTGCCC  
TCGGACAGCCCACGGCACCTCCCTG

>449

TCATCCAGGCCAGCTGCCCCCTCTGTTCTTCATGCCCGCAATGCCTAAAGGCGCTTCCC  
CCCACCTCCAGGTCCCAGTGGCTGTCAAGTCCCTCCGGGTAGGTCCCGAAGGCCCCGAT  
GGGCACAGAACTGGGGGACTTCC

>450

GTGCGGCAGGAGCGTGGGCGGCCAGGGTCCAATGGGTCCGGCTCACGCGGCGCGGTG

TTCCCTCCTGCAGGTGATGGAGCTGGCGCCACTGGGCTCCCTGCACGCGCGCCTAACG  
GCCCCGGCCCCGACACCCCCGCTGC

>451

GGTGCTCCGTGGAGGGTGGGCCTCCAAGGAGCACGTGTCCCGCCCCCTTTCAGCTCCAC  
TTCCTTCGGCAGGTGTGCCCCAGAGAGCCTGCGCCACGGAGCCTTCTCGTCTGCCTCG  
GACGTGTGGATGTTTGGGGTGACG

>452

ATTCCTGCTCCCATATTACCTATCTGACTCAGGCCACAAGCCCAGCCACCCCTTCTCTCTT  
GTCTCCACAGGCCGGGCCTTCGGAAGCATGTTGTGTGAGGGATGTCACAGAACCAGG  
CGCCCTGAGGATGGAGACTGGTG

>453

CTGTGGGCCAGGGCCCAGCCCTAACTCTTGCCCTTATTCCCATCCTATTTACCAGCTCCT  
CTTTCCACAGCCCCGACTCCACAATCTGGAAGGGCCAGAATGGTCGCACCTTCAAAGT  
GGGCAGCTTCCCAGCCTCGGCA

>454

TGGGAGGGTATATTGATCTGTGGGGTGGGGAGAGTTGGTGTGGAGGATGAACTGGATC  
CCTCTCCGACAGAGACAGAAAGAAGGCAAATCTTTGGGATGCGCCCCCAGCACGGGG  
CCAGAGGAGGAACATGCCCCCTGGAG

>455

GATCGCTTGAGCCCGGGAGGCGGAGGCTGCAGCCAGCCGAGTTCAAGTTGTTTCCTTC  
TCAACTGTGCAGGCATTTCCAGGAGTCTGGAGTCAGTTCTGTCCCTCGGTCCTCGTCC  
CACAGGGGGTGGTTCAAGCCCCC

>456

GAAATGGCCTGGTGTCCAGAAGGGGCTACAGGCAGGGGCAGGGGCCTGAGTGAGGCT  
TTGTCTGTACAGATGGAGCTGAGTGTGCATGGGGTCACCCACCAGGAGTGCCAGAC  
AGCACTAGGAGCCACTGGGGGAGATG

>457

TCTTGGGGTCCCTCCTCTCCTGCCCTGCCGCCTGGCAGTCAGCTGCAACCCACCCTC  
CTGCTTCCACAGGTAGATCAGCTCTTCCACCTGAGTAGCCGGTCCAGAGCTGACTGCT  
GGCGCATCCTGGAGCATTACAGT

>458

GTGAAGCCAGCAGGTGCTCTGGAGTTAAACCAGCTTTCTGCAAGCCCTGCTTCCTGGT  
CTCCCTCTCCAGGTACTGGCTGTGATCGAACTTCTCAACCCTCAGAGACTTAGATCTTC  
CACCTCACTCCCTCAGCCAAGCC

>459

CAGGCAGAGCTGGGTGACAGGCCTCGCACTGCTGGCCCTACCTGTAACCTGGGCCTGTT  
GCTGTCTCCTAGCACAACTCTCAGAGCCCATCCCCACCCAGCAGTTCCATTGCCTACA  
GCCTCCTGAGTGCCAGCTCAGAG

>460

GAGGTCTGGGGGCCCAGGCCACACTCTGGGACTAATGTCTTTATCTCTTTCTTCCCTGT  
GGGCCCCGCAGCAGTGAACAGTCAGCCGGGCAAGGACTCAGAAGGAACTCATGAC  
AGCACTTCGAGAGCTCAAGCTTCGA

>461

ATGGCCTGGGCCTGGGCTCCCGTGTTGAGGCAGCCTCCTTACTGAATGCCTCACTGCCT

CCACTCTGCAGCCAACCAGGAATACTACCAGCAGTGGAGCCTGGAGGAGGGCGAGCC  
TTGCTCCATGGACATGTCCACCTA

>462

GCATCCCGACGCACCCCTACTCCTTCTCCACAGCTCTTGAATCTGCTCTTGCTCTCCC  
CCTCCTGCCAGGATACCTTCTCAGTGGCTGTCTCCTTCCTGACGGGCCGAATCGTCTAC  
ATTTCGGAGCAGGCAGCCGTCC

>463

GTGACCTTATTGTTGGAGGAGTGGGTGGCTCTCTGTTGAAAGTCCCTAATGCTCCTCTC  
TCCTTTGCTAGAGGAGGTCCTGACCGGGATCCAGGGCCTCGGTACCAGCCATTCCGCC  
TAACCCCGTATGTGACCAAGATC

>464

AGGCAGAGTGGAGGGCTGAGGAGTTGGGCATTCTGGACGAAACCCAGTGACCACACT  
CTCTGTGCCTCAGCTCCCCGGATACCCCTGACAAGAGGATTTTCACTACGCGGCACA  
CACCCAGCTGCCTCTTCCAGGATGT

>465

TAGGACCTAGAGGAGACGAGGGCAGCCAGGGCTGAGGCCACGGCCACTCTGATGCCT  
CCTTCCCGTTCAGGGCTGCCCCCCTGCTGGGCTACCTGCCCCAGGACCTCCTGGGGGC  
CCCAGTGCTCCTGTTCTGCATCCT

>466

GCGTTGGGGATAGGGCAGTGCGGTGGGGGACAGGACCGGGCCAGGGCTGGATTCACT  
CTTCACTCTACAGGGCCCCCCTGAATGAGGACGTGTTCACTCCCCGGCCCCCAGCCC  
AGCTCCCTCCCTGGACACTGATATC

>467

GAGCCTGGGAGGTGAGAAAAGGTGTGGGAAGCGGGGTCAAGCCATCTAACCTGCCCT  
CTCCCTGCTGCAGCCCGTCCACAGCCCCAGCCCCACGGGACTCTGTGGAGTCGGCGCC  
GTGACATCCCCAGGCCCTCTCCACA

>468

CCAACCCATTTGCTGTTTTTTTCCATGTGAGCTTGAGAAGGCTATTTTCCTCTTTCTCTC  
TTTGCCCCAGCTACAGGCACGTTCAAGGCCAAGGCCCTTCCCTGCCAATCCCCAGACC  
CAGAGCTGGAGGCGGGTTCTGC

>469

CTCCACCTCGGGCTCTAACCCCTGCCACCCCAAGCCCTGCTCTGATGCCCTGTGCTGTG  
TCCATCCCCAGGTACCTGGAGAGCTGCAACCTCCCCAGCACCCTAAGCGTAAATGTG  
CCTCCTCCTCCTCCTATACCACC

>470

TCCCTGGGATCCTCTCTCCTGACTTCCCAGTGGGGGTGGGGATGGTAACTGGCACCATC  
TCTCTGCACAGATCCGCCGTCAGCAGCGCTGTCTGGGGAGGGGGGCCACCCACGGAA  
GGAGCCAGTGGTGGGAGGCACCCT

>471

GAGGGTGTGGTATGGATGTGTTGACCCCTGAAGTGGTTCTGATGACCTTTCCCTATCTC  
ACTCTCCTCAGACATCATGATGGAGGACCTGCCTGGTCTAGCCCCAGGCCAGCC  
CCCAGCCCAGCCCCCAGCCCCAC

>472

AGGGCAGTGTGGGTAGCAGGGGTACTAACCCCAAGGTTGAGGTCCTTGCTAACCCCTAGT

CTCTCCCCACAGGCTGCCACCACGGCCCCGCACCCCCAAGCCGCCGACACCACTGCC  
GATCCAAAGCCAAGCGCTCACGCCA

>473

GTAAGAGCAGTTGAAGGGAGGCCTAGGTGCTGACCCCTCCATCCCTCCTTGCCCCCT  
CCCCTCCTCCAGGCGGAGGTCACTGAGTCCTCCAATCAGGACGCACTTTCCGGCTCCA  
GTGACCTGCTCGAACTTCTGCTGC

>474

GGCCTTGTGAGGTCCCAGGAGTGGGCATGCAGCCGGCCTGACTCCCATTGGTCTGCCC  
CCCCTTCACAGGCAGCAGCCAGAGCAGCCACACAAGCAAATACTTTGGCAGCATCG  
ACTCTTCCGAGGCTGAGGCTGGGGC

>475

TGCCAGCTTCATGGGTCTTGGTCCGGGTCTGGATCCCAGCCTCTGCCTTCTGAACCCC  
TTCTTGGGCAGGGACATGACCTCTGTGCTGAAGCAGGATCGGGAGCGGCTCCGAGCCA  
TGCAGAAGCAGCAGCCTCGGTTT

>476

GGGAAGCTGCGCTGGCAGGTTAGCAGTGAGAACCCTGTCTGACTCTCTCATGTCCATT  
TCTCTACCAAGGCCTGTGTGGACTGTGGGAGCAGCACCCAAGATCCTGGTCACCCTG  
ATGACCCACTCTTCTCAGAGCTGG

>477

CACTTGGGAGGGGGCAGGGGAGCCCAGGCAGGCCTGGTGGGGAGCTGACCCACCGC  
CGTTTCTCTGGCAGGTTCTGACGCGATGAGGAAGCACCTGAGCTGGTGGTGGCTGGCC  
ACTGTCTGCATGCTGCTCTTCAGCCA

>478

TATCCTCACAACAGGCCAATGTTGGCATCTTTGGACCTTTCTAAACATCAACATTTCTGT  
TTTCCTTTAGGAATCGTCTACGAAGCCTGATAAAAAGGTTTCTGTCCCATCAGGACAGA  
TTGGTGGCCCCATTGCTTTGC

>479

TGCCAGGTTTGGTGTGAGTGAGCCACGAACAGGACTGGAGTTCTTACCGCTTGCTGTG  
TTTCTTCCCTAGAAAGGAGCGAGTGGGACTGTGCTGCTGGCCGGCTCCTCTTTGATGG  
CTTACCCCTACAAATCCAGCAGCC

>480

GGAGCTGCTTTCCCTGTTCTGTCTTCAATGTGTGTGTTTTGTTCTTTTCTCCCCTCCTGT  
TTTCTCTCAGGTCTTCTGGCTGGCTTGCACTCCAGCCCGCCCCATGCAGCGCCTCTCCC  
ACACGCTGCGGTGCCCACCCA

>481

GTTACTACTGCCTTAAGGAAATCAGAGAGCATGAAAACTTGCGTTCTAATTTTCTTA  
CTCTTTTCCAGGTGCTTCTCAGCTTCATGGGAAAGGGCCTGCTGTACCACGGAAATTGT  
GACCGCTTCAGAGGCAAGGCTT

>482

AGTAGCTGGGAGTGTAAGGAGAGGACCCTCGTCCCCTCACCAACCTCATCTCTCTCC  
CCCTACCCACAGGTAGCCTCATGGCTGCAACCTGTGAGATTAGCAACATTTTGTAGCAAC  
TACTTCAGTGCGATGTACAGCTC

>483

AAAAAAAATGGGGCTGTAAGGTCTGCTGGGTGGCCTGAGCTGAGCCTGTTTCCCTGCC

TGGCCCTTGCAGAGAAGGCCAGCTGGTTGGGGGAACAGCCCCAGTTCTGGTCTGAAGA  
CGCAGGTTCTGGACTGGATCAGCTA

>484

GCTGCACAGCCAGAGAGAGCCCTTGAGGGAGGGATTAGGGGAGTGTGACCCTTCCTT  
CCTTCCTTGTCTAGCTTCCAGCTCTTCTGATGAGCTCAGTTGGATCATTGAGCTGCTGGA  
GAAGGATGGCATGGCCTTCCAGGA

>485

CCATGGGCAGCATCACCTGTCCTGGTCTGGTCCCCTGAGCCCTCTCTGAGTTCTCACCT  
CCTCTTCCCAGACCAGGGCAGCCCCTTTGCCCAGGAGCTGCTGGACGACGGTCAGCA  
AGCCAGCCCCTACCACCCCGGCAG

>486

CCTGAGAGCCAGCAGCGTGGTTGAACAGAAGGTGGGCCGGCAGGGGACTTACTCTGA  
CCCCGCCCCCAGGGACTGGTGCTTCTCGGAGCTCCCACTCCTCAGACTCCGGTGGA  
GTGACGTGGACCTGGATCCCACTGA

>487

TCCTGTAGAGGGGCTACTCTCCCTAACTCCCCCTTTGCCCTCCTTGACCTTCCACCAC  
CGTCCCCACAGATGGTTTTTCGTGACTGCAAGAAGGGGGATCCCAAGCACGGGAAGCG  
GAAACGAGGCCGGCCCCGAAAGCT

>488

GGGCAGGGCTGGCTGGCCTTGGGTGAGAGGGGACACCTGGATGGCAAACCTGATGGAG  
GCTGGCCTTGCAGCGCCCAGAGGCACCCACCTGTGGGAGTTCATCCGGGACATCCTCA  
TCCACCCGGAGCTCAACGAGGGCCT

>489

GGTGGGCGGGCTGGCAGCCTGGGGCCCATTTCCTGCCAAAGCACCTCTGACCATCCTT  
CTCTTACCCAGGTACTACTACAAACGGGAGATCCTGGAACGGGTGGATGGCCGGCGA  
CTCGTCTACAAGTTTGGCAAAAC

>490

CGGTAAGCCCACCCCCAGGAACCCTGGGGCCCGCTCCTGGTCCCGATCCCATCCCTGA  
CTCCGCCCTCAGGATCGCTCGTCTCTGGTAGCTGCAGCCAAATCATAAACGGCGAGGA  
CTGCAGCCCCGCACTCGCAGCCCTG

>491

GGGGTTGAAGATGAGAATGGAGGTAAGGATGTAGTTGCCACAAAACCTGACCTGCCCTC  
CGTGGCCCACAGTCTCTACACCATCGGGCTGGGCCTGCACAGTCTTGAGGGCCGACCAA  
GAGCCAGGGAGCCAGATGGTGGAG

>492

TGTGTGTCTGCCCTCTTCAAGGAGGTCTCTGCCCAGTCGCGGGGGCTGACCCAGAGC  
TCTGCGTCCCAGGCAGAATGCCTACCGTGCTGCAGTGCGTGAACGTGTCGGTGGTGTC  
TGAGGAGGTCTGCAGTAAGCTCTA

>493

CCTTTCTGAGCCCACATCCATTTCCACCTCTCTGTGTTTTGAATTCTGACTCTCCCTCTC  
TTCACAACAGGGTGACTCTGGGGGGCCCCCTGATCTGCAACGGGTACTTGAGGGCCTT  
GTGTCTTTTCGAAAAGCCCCGT

>494

GTATGTCCCTAGCCCTGGCTGCTGAATTGTTGCGTTCCTGTTGTGTGTTTATTTTTCATAT

TGGCTGAAGACCAAGAGGGAAGAAGCACAGAATTCCTCAACTCCCAGTGTGCCCATG  
AGTAAGAGCAAATGCTCCGTGG

>495

GCCCAAGCTCCCACGAGGAGAGATGGGCCCTTCCGAGGCCCCAAACTAAAGGTGCTT  
TTCTGCCCCACAGGTGCCTTCCTGGTCCCCCTACCTGCTCTTCATGGTCATTGCTGGGAT  
GCCACTTTTCTACATGGAGCTGGC

>496

AGGGACACGTTGCTGATGGTGGCTCTGTGCTCCACCTGCGTGGGCTCCATGGCCTCCC  
CCTTCCCGCTAGGTGTGGGCTTCACGGTCATCCTCATCTCACTGTATGTCGGCTTCTTCT  
ACAACGTCATCATCGCCTGGGC

>497

AAGCTCAGCCGTCCAGTTCCAGGTGGGTTGACAGCCACCCACAGAGTCCCCCGCTGA  
CTCCCCTCTGCAGACGTGGCGTGCTGCACCTCCACCAGAGCCATGGCATCGACGACCT  
GGGGCCTCCGCGGTGGCAGCTCACA

>498

CCTTGTGCCAGTGTCTGCTCCCACCAAGGGCCCTGCCTGTGCAGCCTGGTGACACTGT  
CCTCTCCTGCAGGTGGTATGGATCACAGCCACCATGCCATACGTGGTCCCTCACTGCCCT  
GCTCCTGCGTGGGGTACCCCTCC

>499

GGTGCTCAGGTCCTTTGCCTGTGGCCTGCGTTCTCCTGGGACAGCCTCTCACCGCCCT  
CTGGCTCTGCAGGTTTGGATTGACGCGGCCACCCAGGTGTGCTTCTCCCTGGGCGTGG  
GGTTCGGGGTGCTGATCGCCTTCT

>500

AATAATGACTGGAAAATTGCAGCTGCTGCAGCTCAGCTGGTTCCTGAGACGGCGTGTC  
TTGTTCTTACAGGGACGCGATTGTCACCACCTCCATCAACTCCCTGACGAGCTTCTCCT  
CCGGCTTCGTCTCTTCTCCTTC

>501

CGGGGTGGGGCAGGATGGGCGGGAGAGCACAGCGTGGGCTCTGTGGCAAGCAGGGC  
GGGTTCTGTTTCAGGGCCAGGGCTGATCTTCATCATCTACCCGGAAGCCATCGCCACGC  
TCCCTCTGTCCTCAGCCTGGGCCGT

>502

GTAGGTCTTGGCCCAGGCTGCGGTCAGGAGCGCCGCCAGCCTGCAGCCCGACCCTGT  
GCTCTGTGTGCAGATGGGTGGTATGGAGTCAGTGATACCGGGCTCATCGATGAGTTCC  
AGCTGCTGCACAGACACCGTGAGC

>503

TGAATCCCCAGGCTGGGTTTACCTCTGGGGAAAGCCCTTCTGTAGGTCCACAGGCTCC  
CCTCTCTTCCAGGGTGGCATCTACGTCTTCACGCTCCTGGACCATTTTGCAGCCGGCAC  
GTCCATCCTCTTTGGAGTGCTCA

>504

TGCCCCGCTCCCTGCTTTGTCCTGGCACCGCCGGCTGAGAGCTGCCTGACCTCCGTATCT  
GCTGGTTGCAGTTCGTGGTCGTGGTCAGCATTGTGACCTTCAGACCCCCCCTACGG  
AGCCTACATCTTCCCCGACTGGG

>505

GTGAGTCAGTGGTGGGTGCTGGCAGTGGGTACTGGTCTGCACTGACCCCTGCACTCTC

TTTCTCTTTCAGAAACTGGCCTACGCCATTGCACCCGAGAAGGACCGTGAGCTGGTGG  
ACAGAGGGGAGGTGCGCCAGTTCA

>506

TAGCCACCTTCAGCTGCTCTTAAATGGGGCATCGCCCCAGGGTTTCTGACTAAACCTGT  
TTTCTTTCCAGCTCCGCCACTGGCTCAAGGTGTAGAGGGAGCAGAGACGAAGACCCC  
AGGAAGTCATCCTGCAATGGGAGA

>507

CCCTGAACAATAAGCACAAATGCAGTTTTAAAGACTGTTTGCTTATTTGATGAAATTTCTG  
TACTTTTATAGGAGAATGGGGTACTAAGAGAAAAGCACGAAGCTGTGGATCATAGTTC  
CCAGCATGAGGAAAATGAAGAAA

>508

AGATAAAGCCTAAAGCCCCAACCAGTTCAGTCTTTTATGTGAAAGATGCACTTTTTGTG  
TTTCTCTACAGAGACATCTGAATGGGACAGATACTTCTTTCTCTCTGGAAGACTTATTCC  
AGTTGCTTTCATCACAGCCTG

>509

TTGTTAGGTAATAGAACTGCTTCAGAAATAGGGCTATTCATGTTTGAAGTGTTTCTCCTT  
CGTTTTTTCAGGGCATCTCATTGGGAGATATTCCTCTTCCAGGCAGTATCAGTGATGGCAT  
GAATTCTTCAGCACATTATC

>510

AGAGTAAACAGGAGGCATAGCTGCAGCTTCTGTGGCAGAGCTTGCCTTAACTTCTCAT  
TCTCTTCTTTAGCCCCAGCCCAATTGCCATCAAGACTCCTGAAGCCAGCTGTGCTTGA  
CCAAGGATGGGCCATAAACAATG

>511

TTCCCAGCTGGGAGGGGCGGGGACAGGTGTGCGGCTCCTGCTTCTCCTGAGGGCCTC  
CCTTTCCCCGCAGCTGTGAGGTGGAGCAGTGGGACTCGGATGAGCCCATCCCTGCCAA  
GGAGCTAGAGCGAGGTGTGGCGGGG

>512

GATAGTCCCCAGTGCTGTGGCTTTGAGTTCCCTCGAGGAAAGATACTAACAATGCACTTT  
CTGCACAACAGGGGCCAATCTCAAAGTCATCAGCACCATGTCTGTGGGCATCGACCAC  
TTGGCTTTGGATGAAATCAAGAA

>513

AAATGTCCCAGCAGTAGACATTGGTAAATATGGTTGAGGCTGATGTTACCACCAGATGT  
TTGATTCGTAGTGGGATCCGAGTTGGCTACACCCCAGATGTCCTGACAGATAACCACCGC  
CGAACTCGCAGTCTCCCTGCTA

>514

TGCCGGGTTCTCAGCGGCCCCATCTTGGTCCAAGGCTGGGCCTCTCACCTGCCCCCTCT  
CTCTCCCCCTCAGTGGTGGCTGGACCTCGTGGAAGCCCCCTCTGGCTGTGTGGCTATGGA  
CTCACGCAGAGCACTGTCGGCATC

>515

TCCGGAATGCTGGGTGGTGTCCCTACCCTTTGCGGGACGGGAACGAGACATGGACTC  
TCCTTGCTCTAGGCCAGGCCATTGCTCGGCGTCTGAAACCATTTCGGTGTCCAGAGATT  
CTGTACACAGGGCGCCAGCCCAG

>516

GCTGGTCTCCCGCCATCTGGTTGTCCCTAGCCTGGGACTCAGTGCCTGATGGAGTCCTG

CCCTCCCTCAGTGTCTACCCCTGAGCTGGCTGCCCAATCTGATTTCATCGTCGTGGCCT  
GCTCCTTAACACCTGCAACCGA

>517

GTTGTTCTGCCTCAAAGGTGGCCTGGGCGGAGGGATCTTCGGGGTACCCATGTCACCA  
CTGTCATTCCAGGGGCGACGTCGTAAACCAGGACGACCTGTACCAGGCCTTGGCCAGT  
GGTAAGATTGCAGCTGCTGGACTG

>518

GAAAACAGCCCAGCTGAAGGCTGCTGAACCACCCTTCTTATCTCCCTCTCTCTCTCTCT  
CTCCTTTCCAGTGATTCTGCCCCACATTGGCAGTGCCACCCACAGAACCCGCAACACC  
ATGTCCTTGTTGGCAGCTAACA

>519

TTGGAAGTGGGCGGGGGGTGAGTATGTGCTGGGTGGGGCTGGGCTCCCCAGTGACCT  
CCCCGCCCCCAGGCCGGCTGCATCCAGTGCTTCTCAGCCCCCGCTGGGAGCTGCCC  
TTCTCCGAGGTCATCGACTGGACCA

>520

CCCTACTCAGGTCATTCTTCATGGGGTTCTGTTCCCTCCCACTCTAATAGCCTGTGTCTC  
ATTCCCCCAGGCTCCCGCCCTGAGGGCAGATTACAGCGCCCTGATCTGGGTGGGGCCCC  
CAGGCCAGCCCCCTCTGAAGCT

>521

GCCTCCATTTCCTGGATGTTCTAGGCATTTAGGAGTCCAACCACACAGCTCACTTGAG  
TCCCTCCCCAGGTGGACTTTGCCTTTCTGGTGTGGCAGAGCTTCCAGAGCGGATGGT  
GGGCTTCCTGACGTCGAGCCATT

>522

AGGAGGGAGGAGAATGGGGCCTGGGGATGGATTGCTGCAGCCTCTCCCTGTCTTTT  
CCTCTTGCCCAGGTATTACCACACTCTCTTCACCCACTCCCTGCCCAAGGCTCTGAGGA  
CCCTGGCAGATGAGGCACCCACC

>523

CTTGCTGCACGGGCGTGGGGAGTCGGAAGGGCAAAGAAGCCCGTTAATGCATTGCTTC  
TTTCCCTCTTAGGCGCCTGGGGGCCCGGGGCCAGGCCAAAGCCGCCTGCCCCAGCCC  
CCGACTGCATCAACCAGATAGCGG

>524

GAGGAGCAGGGGTTTCCTGTCAGTGACGCAGCCCGTGAGAACCTCTCTCCCTCCCTCT  
TCCCTCCGTTTCAAGATCCTGTTGACTGTGGTGGTGATCTTCCGGATCCTCATTGTGGCA  
TTGTGGGGGAGACGGTGTACGAT

>525

GCGGTGGGCTCATGTTTGTTGATTGAGTGAATGATTTAATTAACGCCTGACTCTGCTTTT  
TCTCCCTCAGAGTTTACCTTCCAGCAGCCCTACGACCAGGCCACCTGCTGGCAGCCA  
TCCCACCTCCGGAGATCCTCAA

>526

GGGAGGGATTCCCATCACTGCCAGCCGTTGTCCACGGCTCACTCGGCCTTTCTGGCG  
TTCTCTCCCCAGGCGAGAAGCCCTTCTCCTGTCCCCACTGCAGCCGTGCCTTCGCTGA  
CCGCTCCAACCTGCGGGCCACCT

>527

CAAAATAATATAGTACTATGATTTTCCCTTTACTTTATAAGTAATTTTGTGCTGTTCTTTT



TTATACAGCCATTGATTATTATTATTCCTAAAGAAAATGAAGATAATTACATATTTTTGCA  
TTTGGGCAGTAGCATGG

>528

GTGTGTGCACGCTCACACACATATTCACAAATAAGAACCTTTTCAATAGCCAGTATTTT  
CTACTTGGCAGGTTTCCTCAAAGCAAACCACTGGAGAGACATGTTCGAAAAATCCATGAA  
TTTGCATCTCCTAGCAAGATCAA

>529

TCCAAGATTGCAATTTGCTTTCCTTCAAGATCATTGACACTCATAATTGATTGAATTGTT  
TCTTTTTCAGGATGAGTTAAATGCCAGTGGAACCATCAAAGAAAGTGGTGTCTGGTG  
CATGAAGGTGATAGAGGAAGGC

>530

TTCCTCAGATCAATGCAATTTTGCAGCAAATATTCAGTAAATCATTCTTTCCTCCATC  
CTTCCATAGGGAATAGAAATCAAGGGTCCCAGCAGTGGCAACAGAAATATTACCAAAG  
AAGTTGGGAAAGGCAACGAAG

>531

AAGGGTTCATTCACTGTTTTAAGGAAACGATTTATAAATGTTAATGGGATGTTTATTTTT  
TCTCCTATAGAAAGCTAGACTGGCCAGGATCCGGGCAGCCAAAAGCGGAAGCGCAAA  
TGCTTACATGCAGAGCAAACGGA

>532

AATATGTAGCCGAGGTTTCGAGTTGTTTGCAAATAAAATAGAAAGCTCTTCTGTCTTCTC  
TTTGTTAACAGTCCTCAGAGGATGAGCAGGCTTTTGTTAGCAAATCCGGCTCCAGCTTT  
GAAACCCAGCACCAACCACTGC

>533

ATAAAGCTATGTATTTTCGTTTTTAAAAATGTGCTTCTCTGTTTCTTCATTTACTTACAAC  
GTGGAACAGAATCACGAGTTTGTGGACGAACAAGTCTTTGAAGAAAGCTGCATGGAA  
GTTGCAACTGTTAATCGTCCTT

>534

TATTCTTCAGTTGTATGAAAAACATTTTAAAGTAAACAACCTTACTTTCTAAATATTTTTTT  
TTCTATCAGCCGATCCAGTTTAAATGCCAAAATGGAAGAGTGTGTTAAACTAAACTGTG  
AACAACCTTATGTGACTACA

>535

GGAGTGGGGAGGGCTATCAGGCCAGAGCTCAGCGGCCACTGCCCCAGCTCACGGCC  
GGCTCTGCTGCAGGACCCCTTGCAAGTGGCTCGGCTCCCCACCAAGGGGCTCCTGCCCC  
AGCCCCAGCTCCAGCCCCAAGGAGC

>536

AGAAGGGTAGGCGGGTCCAGGCCAGGATCAGGGGGTGTGGGGGAAGGACTGACCC  
CACCTGCCTGCAGAGCTGCAGGTCGCCTTCCAGGAGTTTGACCGAGACCAGGACGG  
CTACATTGGCTGCCGGGAGCTGGGTGC

>537

AGAGGAGGGAGGGCCAGGGAGGGGCAGGGGTCTCTGATGCCCTGGGTCTGTGAATGG  
ACGGGACCCCCAGGTGGCGGAAAGGTGGACTTTGAAGACTTCGTGGAGCTGATGGGC  
CCCAAGCTGCTGGCAGAGACGGCAGA

>538

TGCCGTGAGTGAGGGGCTGCGCGTGTGAATGACTGTCAGTGACCAGACGCCACAACC

AACGCCGCCACAGTTCGACACCAATGGGGACGGCCGCATCAGCGTGGGCGAGCTCCG  
GGCGGCCCTCAAGGCCCTGCTGGGGG

>539

GGGTGGGGGGTGATTGCTGGTCGTTTGTGTGGCTGTAAATTTTAAACTGCCATGCAC  
TCGGCTTCCAGTATGCTGGGAGCGGTGAAGATGGAAGGGCACGAGCCGTCCGACTGG  
AGCAGCTACTATGCAGAGCCCGAG

>540

GTGGGAGGTCTGGGCACCCTCCAGCCGCGGTGCTAACGCTGTCGCCTCCCTCCCGGGG  
CTCTGTCCGCAGGGCTACTCCTCCGTGAGCAACATGAACGCCGGCCTGGGGATGAACG  
GCATGAACACGTACATGAGCATGT

>541

CCAGAACATAGTGGGAGAGAACTGTAGGGATCTGCGGGGCCTAAAGCTAACATATTA  
CTCTGGGGACAGGAAGCAGCTTACCACCCAGAAGTGGCCCCTGATGTGCGGCTTCGA  
GCCCTGCACTATGGCCGGGAGTGTG

>542

GCCCTATTTTCATAGATCAGGGTAGACCCTAAGATGTGATGCTCTTTGTCCCCTGCCCGCT  
TCTTGCCCAGACCCTGCAGAAGCCAAGCCCAGAAGTGAAGCAGCAGTTGACAGGACA  
TTCAAAGCGTGTGGCTGGTTCCG

>543

ACCATGCTCCCTGGTGCTTTTGACCTCCCCACTCTGCCTTAGCCTCTTTCCTCTTCCTTC  
ATCCCACCAGGAACAGAATGGGTAGACCCAGAGGACCCCACAGTCATTGCTGAGAAT  
GAGCTCCTGGGAGCTGCAGCCGC

>544

CTCACCATGGCAGTGTCCCCACCTTCATCTCTGACTTTACATCTCTTTCTGCAACCTTCG  
CTTATTGCAGGAGGCAGATGAGTCCTTGAACCTTTGAGGAGCAGATACTAGAAGCTGCC  
AAGTCCATTGCAGCAGCCACCA

>545

CTTGAGAAGGCTGGAGTGGGGATGGACCAGGGCAAGGGGCATATTTTTTAAGCAAAC  
CTCCCTGCTTTAGGCCCCGGATGGTGGCTGCGGCCACCAACAATCTGTGTGAGGCAGCC  
AATGCAGCTGTACAAGGCCATGCCA

>546

AGAATTGAGGTACTGTCTCAACTGGGACCGTACCTGAGTTCTCAACCTAGGCCACTTT  
CTCTCTGCCCAGGCTGCTGGCAACGCAGTGAAGCGAGCCTCAGATAATCTGGTGAAAG  
CAGCACAGAAGGCTGCAGCCTTTG

>547

GCTGGTCCCAACTACCCTATGCCCCTGCTGTGCATCCTCACTGAACCTAAGTCCCCGATC  
TCCACCCTCAGATCATCGCAGCACAGGAAGAAATGCTTCGGAAGGAACGAGAGCTGG  
AAGAGGCGCGGAAGAAACTGGCCC

>548

TTTTACACACTCACCCACCCATCCCTGGCTTTCTATTTCATGGAACAACCTCTCTCTACA  
ATCCCTCCAGATCTTCGCAAATACTGTGGACAATGCCCGCATCGTTCTGCAGATTGACA  
ATGCCCGTCTTGCTGCTGATG

>549

GTAGGTGGCATGAGTTGAGAAGGTTCTGGATCAGAGATAGGGGCCCCCTCTGATCACCT

CCACTCCTATAGGTATGAGACAGAGCTGGCCATGCGCCAGTCTGTGGAGAACGACATC  
CATGGGCTCCGCAAGGTCATTGAT

>550

ATCACAGAAGAAAGGCCTTGTTGGAGCTCTGACCCTGAACCCTCCTCACTTTTGCCCC  
TGTCACCTTTAGGAAGTAAAAGGCCTACAAGCCCAGATTGCCAGCTCTGGGTTGACCG  
TGGAGGTAGATGCCCCCAAATCTC

>551

GGATGGCTGCCAAGGTGTGGGAGGGAGGCAGACGGAATGAGGGGCCTGATGGACTGT  
CCCCATCCTGCAGATTGAGGAGAGCACACAGTGGTCACCACACAGTCTGCTGAGGTT  
GGAGCTGCTGAGACGACGCTCACAG

>552

CCAAAAGTGAAGGGATGAGCAGTCCTGGGACTCTGGGCTCACCTGCCCCCTCCTCTCT  
GTGCCCCCTGCAGAAGGCCAGCTTGAGAGAACAGCCTGAGGGAGGTGGAGGCCCGCTAC  
GCCCTACAGATGGAGCAGCTCAACG

>553

CCTCTACCTTTCTTGTCTCCCTTCTACTCCACGGGGCTGTTTATAACTTGGGCTTGGTCT  
TCTGTTACAGTCTTGGTGATGCCTTGACAGCAGCAACTCCATGCAAACCATCCAAAA  
GACCACCACCCGCCGGATAGTG

>554

ACCACAGTTAATTTTCTGCAAATATTAAACAGTTTTACTGATCTAAAATATTATTTTATC  
TTACAACAGGGAAATTGGTTACAGTAAAATATTTACGACTAGATAGATACCACCATCGC  
TTTCCCCAGGCTCTCACTTC

>555

AAGAACTCAAGTTCAGCAGGGACAGGCCCCACACCCTGGCTGCTGGCTCATGTTCTCC  
TCCCACCCCCAGGCCTGCACTTTATAGACCAGCACCGGGCTGCGCTTATCGCGAGGGT  
CACAAACGTTGAGTGGCTGCTGGA

>556

TCTACTCTTCTTTCTTGATGCATGGAGAATGCCAGCACTAATTTTTTTCTTTCCTCTCTTT  
TCCTTTTAGGCACACCATATGATCCCTATAAGGCACTGTGGTTTGAGCGGAAGAAGGAC  
CCTGTTACCAAGGAGTTAAC

>557

GTGCCCCCTCCTCCAGGCAGCCTCCTAAGCCCCGCCACCTAGTGATGCCAGGCGCCCT  
GTGTCTGCCCAGGGGGCCGGGTCTGGAGGTGGGCTTTGGCATGGCCATCGCAGCGTC  
AAAGGTGCAGGAGGCGCCCATTGA

>558

GAGGGGTGGGCGCCAGGGTGCAAGTGACCCCCATGGCCCTCAGAGGTGACCTGGTGC  
CATCCCCGACCAGGAGACGCAGGTGCCCCGCGCTGCTGGAGGCGGCTTCCGGAGGGA  
GAACATCCGTACGGAGGTGATGGCGC

>559

TAATTTTCAAGCTCATGAGTGGTTGTAACTTTAAACGTTCACTAGAGATGGCTTTCTGT  
CTTTGTTTCAGCCGTCTGCCGTTTAAAGCGCTGAATCTTGTCCCAAAGGGGAAAGCC  
GATGACATGTCAGACGATCAGGG

>560

TGCTGTGAACCGAGCTTCCTCCTGGGAGTTGGAGGGAGGGCCACCTGTCACTTGCCAC

ACTGTCTTGTAGGATCAGGAGCGTCTGGGCAAGCAGCTCAAGTTACGTGCAGAAAGG  
GAAGAAAAGGAGAAGCTGAAAGAGG

>561

CTGTGTGCGTCCATGGTGCCTCCTTTCTCCCATTGCTCGAAGACCCCATCGGGTCTCTT  
CTTGATTTTCAGACCCCTGGCCGGCTCCTGTGGGAAGTTTGCCCCCTTTGAAATTAAAGA  
GCACATGGTCCTGGCCCCCTCGGC

>562

AGGTTCTTGGGAGGTTTGTGAGCAGGTCTGTAAGGCAGCGTGATCCTGAGCCTGGGGT  
TTTCCTTCTCAGTGATGTCGTCATCGTGAGCGTGGGAAGGGCGACGGTGTTCCCGAG  
AGGAGGAAGTTTGGCAGGATGAAG

>563

TACCTCCTCACTGTGCCCCCTTTCCTCCAGCCCCAAAGACAGTTGTGAGTCCCATGTGTT  
TCTTTTCTCAGAAGCTCCTGGACTATGAGGTGGACAGTGATGAGGAGTGGGAAGAAG  
AGGAGCCTGGGGAGTCCCTGTCCC

>564

ACTTTGTTTTTAATAAGGCACACACTCTGCTTTTCTATCTGATGAACTCTTTTTTTTTTCT  
CCTTTTGAGGATGATGATGACGACATGGGAGAGGATGAAGATGAGGACGATGGTTTCT  
TTGTGCCCCATGGGTACCTGT

>565

TTCCTCAAAAGAGTGCCTGGGCATAGGGGAGCAAGAACCCCAAATAAACTTCTGCTTT  
CTAAACCACAAGGAGTGTGCCGACCTGAGAACCATAAGGTCCGCCAGAACTGAAG  
GCCAAGGAGTGGGACGAGTTCCTGG

>566

TTTTGTTTTTTGGCCTGTGGTGATGGGTGGCTCCCCAAGCCTCATGCCCACCCATGTTT  
CCTCCTGCCAGTCCTGGCCCAGCTGCTGCCGCTCCTGCACGGCAATGTGAACGGGAGC  
AAGGTCATCATCCGGGAGTTCCA

>567

CCCGCTACCGCACTGGCACCAGGGTGGCTGCTGCCTGCAGTGCTGATGGCCGTGTACC  
CTGTCTGTCCAGATTGGTGCTGAAGACATGGACGGCTTCCAGGCAGACACGGAGGAG  
GAGGAAGAGGAGGAGGGCGACTGTA

>568

GGGTGGGGTCTTCCCCAGGGAGCCCAGAGGGGCCAGCCAGCTCAAGACCCTCCCTC  
TCTTGCCCTGCAGAGGTCCAAGCCCCGTGTGGAGCCGCTTCCGGAGCTGGGGGTGGT  
GTGGGGGTGGACACCGGCAAGGCCAC

>569

GCCTTATAAACAAACAGGATAGAAGATACTGCTCGACAGTGCCATCCCTATCATGGCCTT  
GTTTTTTACAGGCCCAACGAAGGAACCACTTCTGGGAACTCATTGAGGAAAGAGAGA  
ACAGCAACCCCTTTGACAACGATG

>570

CCTGCTGGGCCTTTACTGGTGGCTTTCCTTTCTGAGCACTCATGAGGCCCTGTGTCTT  
CCCTCATATAGATTCCAGGTGGATCTGCAGAATGGCAGCAGTGTAACCTCGAGCCG  
ATGTGGCCTTTCATTTCAATCCT

>571

GGATAATAAGTTAATTTATTAAGTGTTTTTTTTTTGGTGGCGGGGGGGCTCTGTCTTCTGT

ATCTCTCTAGGTGGCTGTAAATGGAAAACATACTCTGCTCTATGGCCACAGGATCGGCC  
CAGAGAAAATAGACACTCTGG

>572

TTTGGACACGAGTTTTCCCTGGAGATCGCTTTCTGCAGGCCTCTTGGTCCTGACTGTGG  
CTTCTTTTCAGAGCCTGCCATTCGCTGCAAGGTTGAACACCCCCATGGGCCCTGGACG  
AACTGTCGTCGTTAAAGGAGAAG

>573

CATTGCTGAAATTGCCACTACTCTGTCCTACTTGGTTAATTAAGGTTTTTTTTTCTTTCTT  
TCTCAAAAGCTTTAATGTTGACCTACTAGCAGGAAAATCAAAGGATATTGCTCTACACT  
TGAACCCACGCCTGAATATT

>574

GTTAGCATGTAACAAACACAAAATTTTAAACTAAGGGGAACCACTAATGGCATGTTTCC  
TTTCCTTTTCAGATGATAATTTACTGTGATGTTAGAGAAATCAAGGTTGCAGTAAATGGCG  
TACACAGCCTGGAGTACAAAC

>575

AGGCTTCATGGAGGAAGTGCAGTGGGTTTCTTGGGATCCCCACCAGGCACCCCTTCCT  
CCTTCGACTTAGGGTGTGGCCGGCCGCAGGTTTCGGATGCAGGCGGCCGGATCGTGGG  
GGGTCACGCTGCCCCGGCCGGCGC

>576

CTGGGCGGGGCCGACACTGACCTCCAGCCTCCGCAGCTGGCCCCCTCTCACCAGCCA  
CCTTCCCTCCCAGGTCCCTGAACTCATCCGACTACCAGGTGCACCTGGGGGAACTGGA  
GATCACTTTGTCTCCCCACTTCTCC

>577

CAAGGTCTGCCATGCCCCAGTGCACGGCCTGGTGCCCCAACCTTCTCTGAAGCCTGT  
TCCCCCAACCAGAGCCTCTGCCACCTCCGTACAGCCTGCGGGAGGTGAAAGTCTCCGT  
GGTGGACACAGAGACCTGCCGCCG

>578

GGGGCGGCTGAAGCCCAGGGAGGGGCTCCCCATCTTCTCGGCTCCCAATGCTCGCCTT  
CTCTGTCTCAGGACGACTCCGGGGGGCCTCTGGTCTGCCAGGTGAACGGTGCCTGG  
GTGCAGGCTGGCATTGTGAGCTGGG

>579

TCCGAACATCTATACTATTTGATCTCTCTAACCTGTGTTTTGTGATATTTATCATTTGTTG  
TACTCCAGGTTGAATTCACATTCCCTGACTTTGTAACAGAGGGAGCCAGGGACCTCATT  
TCAAGACTGTTGAAGCATA

>580

GGAAATTAGTTTGCTCTGTATGGGTCAAATATAGGCATATTCTCATGATTGTCATGTTTCT  
TTCTCCCAGCATTTATCAGCTGCCGCTTATTCATTGCCTTGATTTTCTTCAAAAGACAAC  
TATAATCATTCAAAAATTC

>581

CTCTTGAGAAATCCTGTGTCTCAGAAACCTTCGGAGACATTTAAGCCCTCTCACCCCTCT  
CTTTAAACCAGGACTCTGCATGCTGCTGAAAGCAAATGAATGTGGAGGGTTTCAAACA  
AGACAAAAGGCATTCCCTCCCTGC

>582

CCCAGTTCTGTGTCCTGACTGGGTGGGGTGGAGGGGCTGCTCCACATCTCACAGCGTT

CTCTGGCTGCAGAATCTCCAGCCAAGTCCTCCGTGCTCGTGGTGGGAATCGTCATCGG  
TGTCTTGCTACTCACGGCAGCGGC

>583

TGGGGGACGCCAGTCAGACCCAGAGCGCCTCAGAGATTCTGATGACCTCTCCCTCTCT  
CTCTCTCCTCAGCCCCCTTGGATCTCCCTTCGTGGAGACGACACCGGGGTCTCCTGCCC  
ACCCAGGGGAGGCCAGGATGC

>584

TGGGTGGAAAAGGGCTCCAGGGTCATTATCATGCTTTTGGTTTTCTGACATGCTCCATT  
CTCTGTTGCAGCCTTGGAGTCCTCAAACCCCAACACCAAGCAAGCATCATTCTGGAGA  
CCGTCCCCCTCAAGAGTGGACAA

>585

CAATGACTCATCAACCCCTATATCTATAAAGTCACAATCGCTGTGACTTGATTCTGTTT  
CACTTTGTAGATATGGAACCCATTACATGGACTTTTTAAGAAGCTTGGAATTCCAGGG  
CCCACACCTCTGCCTTTTTTG

>586

CTTCCTGGGTGGGCTCCAGCTGTAGAATAAGGCTGTTGATGTTTAATCAACTCTGTTT  
TTTTACACAGCTTTTATGATGGTCAACAGCCTGTGCTGGCTATCACAGATCCTGACAT  
GATCAAAACAGTGCTAGTGAAA

>587

ACACATTTTCTACAACCATGGAGACCTCCACAACCTGATGTAGGACAAAATGTTTCTGCT  
TTGAACTCTAGCCTTTTGGTCCAGTGGGATTTATGAAAAGTGCCATCTCTATAGCTGAG  
GATGAAGAATGGAAGAGATTAC

>588

GGAAAGCCATGTCCTTCTGGGACTAGAGTCTGCACATTTAACTATGGGTGGTGTGTGT  
TTTGTGCTTAGATGGTCCCTATCATTGCCCAGTATGGAGATGTGTTGGTGAGAAATCTG  
AGGCGGGAAGCAGAGACAGGCA

>589

CTGTTGCATGCATAGAGGAAGGATGGTAAAAAGGTGCTGATTTTAATTTTCCACATCTT  
TCTCCACTCAGCGTCTTTGGGGCCTACAGCATGGATGTGATCACTAGCACATCATTGG  
AGTGAACATCGACTCTCTCAAC

>590

ATTGCTCCAGGTAAATTTTGCACATTCACAATGAATTTCTTTTCTGTTTTTGTGTTT  
TTCTTACAGCAGTCTTTCCATTCCCTCATCCCAATTCTTGAAGTATTAAATATCTGTGTGT  
TCCAAGAGAAGTTACAAA

>591

TTCTCTTCATCTAAACTGTGATGCCCTACATTGATCTGATTTACCTAAAATGTCTTTCCTC  
TCCTTTCAGCTCTGTCCGATCTGGAGCTCGTGGCCCAATCAATTATCTTTATTTTGTGCTG  
GCTATGAAACACGAGCAG

>592

GTA CTGCATGGACTGAGTTAAAAGTTAATTCAAATCTCAATTTATCCAAATCTGTTTCG  
TTCTTTCCAGGCACCAACCTATGATACTGTGCTACAGATGGAGTATCTTGACATGG  
TGGTGAATGAAACGCTCAGAT

>593

AAACCCTAACATGTAACCTCTTAGGGGTATTATGTCATTAACCTTTTTAAAAATCTACCAAC

GTGGAACCAGATTTCAGCAAGAAGAACAAGGACAACATAGATCCTTACATATACACACC  
CTTTGGAAGTGGACCCAGAAAC

>594

TCACTTTGATGCTATACTTTCTACTTTTGTATTATTTAATGCTTCTCAATATGCTTGTTTAAAC  
TGTTGCAGATCCCCCTGAAATTAAGCTTAGGAGGACTTCTTCAACCAGAAAAACCCGT  
TGTTCTAAAGGTTGAGTCAA

>595

TTAGACCAGGCTCTCCCTGGGCCAGGCTCCGGTGGGACACTGGCAGGCTGACGCATGT  
ATCTTCTCTCAGGGTGTCTTGCCATGGTCCCCTGGTGCTGCAACTCCTCTCCTTCACG  
CTCTTGGCTGGGCTCCTTGTCCA

>596

GGGGCTCAGTTCAAGGCTTGGCACACAGTAGGTGTCTAATAATTGCAGTTCCTTTTTTA  
TTTTGGCCAGTGTTCAAGGTCCCAGCTCCATAAGTCAGGAACAATCCAGGCAAGAC  
GCGATCTACCAGAACCTGACCCA

>597

GAAGGCTGGGCAGGTACAGGAATATGGACAACCTAATCTAAGCCCAGCCCTGACCAGC  
CTCCCCCAACAGAACGCCTGTGCCACCCCTGTCCCTGGGAATGGACATTCTTCCAAGG  
AAACTGTTACTTCATGTCTAACTC

>598

AAGAGATGGGGAGACAGAGCCTGGAAAATGGGAAGCAGAGCTCCCTCCTGACTCCTC  
CTGTACCCTCCAGAACTTCCTACAGCTGCAGTCTTCCAGAAGTAACCGCTTCACCTGGA  
TGGGACTTTCAGATCTAAATCAGG

>599

GACAGAAGGTAGAAACACAGCTCATGTAGCTGGCGGGGACAGAGGCTCACATTCCGC  
ATGGGCTTTGCAGCTTCAAGCAGTATTGGAACAGAGGAGAGCCCAACAACGTTGGGG  
AGGAAGACTGCGCGGAATTTAGTGGC

>600

TGGGGCTCAGTTCAGGGCTTGGCACACAGTAGGTGTTTAATAATTGCAGTTCCTTTTCT  
TCTTGGCCCAGTGTTCAAGGTCCCCAGCTCCCTAAGTCAGGAACAATCCGAGCAAGAC  
GCAATCTACCAGAACCTGACCCA

>601

GAAGGCTGGGCAGATATGGGAATATGGACAACCTAATCTGAGCCCAGCCCTGACCACC  
CTCCCCCAACAGAACGCCTGTGCCGCCACTGTCCCAAGGACTGGACATTCTTCCAAGG  
AAACTGTTACTTCATGTCTAACTC

>602

CAGAGACGGGGAGGTGGAACCTGGAAAATGGGAAGCAGAGCTCCCTCCTGACTCCTC  
CTGTACCCTCCAGAACTTCCTACAGCTGCAGACTTCCAGGAGTAACCGCTTCTCCTGGA  
TGGGACTTTCAGACCTAAATCAGG

>603

TTACAGAAGGTAGGAGTGTGGCTCATCTACTGGGCAGGGCAGAGGCTCACATTCTGCA  
TGGGCTTTGCAGCTTCCAGCGGTACTGGAACAGTGGAGAACCCAACAATAGCGGGAA  
TGAAGACTGTGCGGAATTTAGTGGC

>604

TCATGTGTAGCTGCCCTGTCCCCTGGGGCTTTATCTCATCCATGCAAACCTACCATCTGCT

CAACTTCCAGCTACACCCCGTGCACCCTTTTGACTGGGGACTTGCTGGTTGAAGGAGC  
TCATCTTGCAGGCTGGAAGCAC

>605

CCCAACTTCAAATTTTTTCATATAATATAGGAAAAATAATGATTGAAACATTTAAATGTTT  
TTCTTTACAGATGTTTCATTTGGATCCTTCTTTGACTCATACAATATTTAATCCAGAAGTA  
TTTCAACCACAGATGGCAC

>606

TGTACCTTTGTTGCCGTAATTTTTAATAAGTATTTCTCAAACCTTAATTGGCTTAACGTTCA  
CCTTTGCAGAGAGGATTTTCGTTTCCGTTATGTATGTGAAGGCCCATCCCATGGTGGACT  
ACCTGGTGCCTCTAGTGAAA

>607

TATCATAAACATGTTTCCATGTTGCTGGAGAGTCAGATATGCTAACTTTTGGAATGTGCT  
TCTTATATAGATCTGCAACTATGTGGGACCAGCAAAGGTTATTGTTCAAGTTGGTCACAA  
ATGGAAAAAATATCCACCTGC

>608

CAGATTCCCTAGACATTAAGTGCCTAACTTTTGGTTGTTGTTGCTGCTGCTGTTACTGTT  
TTTTCTCCAGCTTCGCAAACCTGGGTATACTTCATGTGACAAAGAAAAAAGTATTTGAA  
ACACTGGAAGCACGAATGACA

>609

TTATAAAAGCATGGTCTTTTAAATGTTCACTTCCCTGGGCATGAATGGACTGTGCTGT  
ATGGCCCTAGATCGGGAAAAAGAGCTAATCCGCCAAGCAGCTCTGCAGCAGACCAAG  
GAGATGGACCTCAGCGTGGTGCG

>610

CCTACCTAAAGGACTGGCTTGTTGAGCTGAGGATTAATCATGTTATTTGTTGTTTTTCCC  
CTGTGAACAGAAGCCCCCAATGCATCCAACCTTGAAAATTGTAAGAATGGACAGGACAG  
CTGGATGTGTGACTGGAGGGGA

>611

ATTTTTTCAGCATGTTTATAAATACTATTTTACACTATGTGAAATTACACACTTCAATGTGAT  
TGTTTGCAGATGACATCCAGATTCGATTTTATGAAGAGGAAGAAAATGGTGGAGTCTG  
GGAAGGATTTGGAGATTTTC

>612

TGAGTAGCATTACTGCAAAAAAAAAAAAAATGTAGTCCTACACCAACATGTGGTTCTT  
CGTATCCTGCAGTTTGCCATTGTCTTCAAACCTCCAAAGTATAAAGATATTAATATTACA  
AAACCAGCCTCTGTGTTTGTCC

>613

GGTCTTTCTGTGGCTAGTGGTGGGACCAAATCAATCTTTTCTCCTCTGGTTTCTCTTCCT  
TTAAATACAGATAAAGAAGAAGTGCAGAGGAAACGTCAGAAGCTCATGCCCAATTTTT  
CGGATAGTTTCGGCGGTGGTAG

>614

GACACTAAGTTGTGCTGAGTCTTTGTAAAATATCTTCATGATGTTTCATTTGTTTTACTT  
GCCGTTTCAGGGTATAGCTTCCCACACTATGGATTTCTTACTTATGGTGGGATTACTTTC  
CATCCTGGAACACTACTAAATC

>615

CATTGGAATAGCGAATTATCACTAAATACATTTTACTGAGAAAAATCTGATGTTTTTGCA



TTTATCTTAGGAACCATGGACACTGAATCTAAAAAGGACCCTGAAGGTTGTGACAAAA  
GTGATGACAAAAACACTGTAAA

>616

CCTTAAGCATGCCATACCCATAAAACAAAAGTAGGAACACTCAACTATGATTGTGGTCA  
TTGCCTTACAGATAACCTCTTTCTAGAGAAGGCTATGCAGCTTGCAAAGAGGCATGCCA  
ATGCCCTTTTCGACTACGCGGT

>617

TCACATCTTGGGAATCTTTTCTTTTTCATTAACATTTTAGTTAATTATTGCCACTGTGTTT  
TCATTCCAGTGTCTTACACTTAGCAATCATCCACCTTCATTCTCAACTTGTGAGGGATCT  
ACTAGAAGTCACATCTGGT

>618

CTACCAAGCTGTGAGTTGTAAGTAAGTATTCACTGCTGACCAGTGAATCTCCTGCCCTT  
TCACTTTCCAGACGCCCTTGCACTTGGCAGTGATCACTAAGCAGGAAGATGTGGTGGA  
GGATTTGCTGAGGGCTGGGGCCG

>619

TCAGCTTCACAAGGGCCATCTTGTGAGTTAGCCATCCCATCCTGTGACTGTCCCTTTGC  
TTGGACTCTAGGTCTGAATGCCATTCTATCTAGCCATGATGAGCAATAGCCTGCCATGTTT  
GCTGCTGCTGGTGGCCGCTGG

>620

CACTGGGAGGTGGGGACAAAAGGGCAAAAGAACCTTCCACTAACGCTTTCTTGTGTG  
GGCTGGATTGTAGGGTGATGCCCATGTGGACAGTACTACCTACGATGGAACCACACCC  
CTGCATATAGCAGCTGGGAGAGGGT

>621

TGACCTTTGCAGGCAGTTGGAAGTTGACAAGATCTGGGTTTACCTAATGCTGTGTAATC  
TAACTTCGCAGGAGCAGATCCCCCTGGTGGAGAACTTTGAGCCTCTCTATGACCTGGAT  
GACTCTTGGGAAAATGCAGGAGA

>622

GCAATGATCAGTCCCTCCAGAGTGTCTATGGCATGTTAGAACAAGTGTGTTCCCTTCTTC  
ATTTCCCTTCAGGAGACATGAAACAGCTGGCTGAAGATGTGAAGCTGCAGCTGTATAAG  
TACTAGAAATTCCTGATCCAGA

>623

TGTCAGTGCTTACAGCCTGCACTGGGACTCGAACACAAGAACATGCTCCTCCTTCCTT  
TCTTTCTCACAGGTCTCTGGGGGTACAGTCAGAGAGCTGGTGGAGGCCCTGAGACAAA  
TGGGCTACACCGAAGCAATTGAAG

>624

CCACAGAATAGTCCATGAGCTTTTTAGAGCCCGGCCATTCCCCCAGTGAATTTGTGCTT  
TCTCCCCTCAGACGAGCTCCGAGACAGTGACAGTGTCTGCGACAGCGGCGTGGAGAC  
ATCCTTCCGCAAACTCAGCTTTAC

>625

GAGAGTCTAGAGCATATTTGGTCATAATTAGAACTAGCATTCTTCATCCTGTATTCCTTT  
CTTTTCTCAGGCCCTGAAAAGACAGATGAATATCTCTTAGCAAGGTTCAAAGGCGATG  
GTGTAAAATATAAGGCCAAGCT

>626

ATTTTAATATTA AAAACCATGTAGGATGTTTTTAAAAATTCAACTTCTCTTGTTTTTCCAC

CCTCATCAGGGAATGGCGGCACGTGGTCGGTCTCAGGGACAACACAAACAAAGGATC  
TGGGTCAACATTTCCCTTTCTG

>627

GCGTCGGTGTGCTAGCCTGCAGATAGATTCTAGTTTTCTTAATAGATTACTCGTTATGTT  
CTTTTGTGAGGTAATAGAGCATGAACATCCAGTAAATAAGATTTCTTTCATTGCCCGTGA  
TGTGACAGACAACCGGGCAT

>628

ATTGATAGCAGACAAAGGAAATAAAATACTAAAATTAAAATACTGATAACAGTGCTTTC  
CCTTACTGCAGGCTGAACCATTAGTTGTTGATCTTAAAGACCTTTTTCAAGTTATCTATA  
ATGTAAAGAAAAAGGAAGAAG

>629

ATGTAATTTTCTCATTTGAAGTCACAACATGGACTAACACTTTCTTTTTTTTTCTTTCCA  
AATGTGATAGGAAAGCAAAGATATCCTGTAGTGGATCTAAACTCTGAAATCGACACCA  
ATCAGAATTCTTTAAGAGAAA

>630

AGACAAAATGAGGCTGTATTTCACTGTAGTGAGTAACTAAGGCTTCTCCCTCCCTCCC  
TGTCCTGTCAGTCTTCAGCCAATGACTTGCTTGCATCAGACATCTTGCTCCTCCCGTC  
TCAGAACCTTCAGGCCAGGCGT

>631

TGCTCTCTGAAATTCAAGAATCTTCTTCAAGCTTGATTCCTGATAAGTATTTTTCTTCCT  
CTTACTTCAGGTGGTGTAAGTGTCACTCCCTCAGGCAGGACCATGGAACACAGCAT  
CTTTGGTCTTCAATCAGTCCCC

>632

GCTGACTCGGGGACTGGCCTATATTTGGGGAAAGCTTGTCTACTGATTGCCTGGATTTT  
TTACCTTCTAGAACCACCAAAGCCAGCTCCCAGACAAGTTTCCCTGCCAGTTACCAAA  
TCTACTGACAATGCATTTGAGAA

>633

AAGTCTTCATTGCGATTTTTTTCTTATGACTGTAACTGTATTTATTGACTAGATGATTTTA  
TCTTCTTAGGTGGCTTCTTCTCAACCTGTATCTTCTGAGATGTATAGGGATCCATTTGGA  
AATCCTTTTGCCTAAATTC

>634

ATATTTAATACATTGATATTCAGTTCAAAAATTCTAACCACAAGTTTCTTTCTTCTCCATA  
CCTCTCTAGGAACTTGGTCTGCAGACCATCCAGAGGAATAAAAAGGTTGGCCTTAGTA  
GTCAAAAACAAAGCTGATAGC

>635

AGAAAATGGTGCCTGAGAGGCTACAGCAGGACCCGGCAGTGACCCGCTGCTCTTGGC  
TGTCTCCCTGCAGGCTCCACAGACTCTCCTGGGGCCCAGAGGAGCTGGTGCTGACCTA  
GCTAGGGATGCAAGAGTGAGCAAGC

>636

TTTCTTAAACAAATTTTTCTCCCATTTGTCATGGTTCTGTATATTAACACAAAATTTCTT  
TTCTCATAGGAGAGATTATTTCAATCAATTTTTTATGAATTATTACCATTTGTAATTCA  
ATAGTAGCAGAAGACAA

>637

GCCCTCATCATGTTGATCATTACTATCACTGTGTTTCTGAAATGTCAGTGAACATG

TCTTTTATAGGTGGAACATAAATAATGATACCTGGGTCATAACTGAGCAACTAAAACCTT  
TAACAGTGAATTTGGATTTC

>638

TCTTCCGGGTCCTGACTGGTTACATAGTGTACCTCTTCCGGTTCCTGACATTGTGTTCA  
TCTCTTCCAGGTATTCTAGAATGGATTCTGGGAAAGAAAGATGCCATGTGGATAGGGTT  
CCTCACTAGAACAGTTCTGGA

>639

AAAAATAAATGAAGTTATTTACTAAAATTAAAAAAAAGTTTCATTTTTCTTTTTAAATGT  
TTCTATATAGTTATGAAGAAGCCAAGAATTTATTGACCAAGACCAAGATATTGGCCCCA  
GCCTACTTTATCCTGGGAGGC

>640

AAATGCTAATATATATCAGAACATCTCTGAATTGAAAACGTCCTTAAAGTAAAAATAACT  
TTTCTTTCAGCTGACCGTATACACAACCTTGATAGATGTTACCAAAGGTCAATTCGAAA  
CTTACCTGCGGGACTGCCCTG

>641

CAATACATTGTTTCTTTCTAATATATATTTTATTTAATCAGACATCTATTTACCTCTCCTTG  
AATTGCAGACTCACAGATGAATGCTTCTCACCCGGAAACAACTTGCCAGTTGGGTAT  
CCTCCTCAGTATCCACCGAC

>642

ATAACCCTAAAAAGGTTGACAATTCCATTTTTGGTGCAGTTACAAATCATTTCACTTGTT  
TGTATTTACAGGACCTCCAGGATATAGTGGCTACCCTGGGCCCCAGGTCAGTACCCACC  
CCCACCAGCCGGCCATTCAGG

>643

TTATAATATCTGGATAAATTCAATATTTTTAACATAGAGGTGATTATGATTTTCGTCTTTTAT  
GTTTTTAGTTTTAACAGGTTTTTGAACTAATAACAAATATGAAATTAAGAACAGCTTTG  
GACAGAGGGTTTACTTTGC

>644

GTCATTGAACCTTTCATCGAACCTAGGCATTATGATTATTACATTTACATATATTATTTTGC  
CTTTGTAGATAGAAATCCAAGCTCCTCCTGGTGTACCAATAGGTTATGTTATTCAGACTT  
GGCACCCATGTCTACCAA

>645

ACTTCAAATTTGAAAGTACTTTTGCTATAAGTTTCCTAAAAGTATTTAATACTTTTTTTTT  
TCAATTTAGATTAAATCTCTTGATGAACAGTGTGTGGTTGGCAAAATTTCCAAGCACTG  
GACTGGAATTTTGAGAGAGG

>646

TTTCTGCATCTGATAATTGATCTCTGTTTTGTTGTTGAAAATTCATTTGTATACTTTTGT  
TTTATCTAGGACTTCATGTTTTTTGAAAGCACTGGCAGCCAGGAACAAAAATCAGGAG  
TGTGGTAGTGGATTAGTGAAA

>647

GTTAGGAGGCCCAGAACTGGAGAGCTAAGGCATACTTCATCAGCTTAGCACATGACGA  
CTGTCTCTCCAGACTGCGTGGAGTGCATGGCGTGTTTCCAGACAACACAGTTTCGTGCTGG  
CCTGACACCCAAGTTCATTGATGT

>648

TCCTGGGCCCATGAGCTGATGAGAGCCAGAGTCTGAGCTGCACTGCCTTATCATTTCTT

CCTTGCCCCAGGTCCCTGGCTCTGTCACTGAATACAAGGTCTTGGCACTGGACTCTGC  
CAGCATCCTCCTGATGGTACAGG

>649

TAGAGGCAGTCACTTATTTGAATCCCATTGTGCGTAACTTTCTACTATTTTATTTTCCACT  
GTGACTCAGGGAGATTCAGGTGGTCCCTTAGTTTGCAAACACAACGGAATGTGGCGTT  
TGGTGGGCATCACAAGCTGGG

>650

GCTGTCAATGGGGAGGAGTTGTGGCCATGTCCAAGGCACCTGTCCCATGCCCCCTGCCT  
CCTCTCACACAGGATGGTGTGAGGATGGAGGAGATTGTGGAGGGCTGCACCGGAGCA  
CTGCACATCCTCGCCCGGACCCCA

>651

TGGGGTGTGTTGTCCGGCCTGCCTCACCCCTTTCCAACCTCTCCCCTGCTTCCCACGTCC  
CCTCTCCCCAGCTCCTGTACTCGTCGGTGGAGAACATCCAGCGCGTGGCTGCCGGGGT  
GCTGTGTGAGCTGGCCCAGGACA

>652

GTCCCACTCCCCCAGCCACGATGGAGGCTGGCCGACGTTTAACCTGGCTTTTCCTTTCC  
TCTCTGCTCAGCCACCTACGCTGCTGCCGTCTGTTCGCATCTCCGAGGACAAGAAC  
CCAGACTACCGGAAGCGCGTGTCT

>653

AGGCTGTGCAGACTGCTCCCTGCAGGGTAGCTTGCAGACCCTAGGACCGAGCCCCACT  
TTTTGTCCCCAGACATGGATGCCACCTACCGCCCCATGTACTCCAGCGATGTGCCCTT  
GACCCGCTGGAGATGCACATGGA

>654

CCCTTTCCCCGCCCCCTCTTCCCCTCGCCCCACTCCCATTCCCCTTCTCACCACCCCTCC  
TTATTCCCAGACTGCGGCCAACTCCTGGGGCCCAGCCTGGGGCGAGAGGGGCCACTTC  
CGCATCGTGCGCGGCGTCAATG

>655

TAAGCTACTATGCAAGTAGATTTTCCTCTTCAGCGTCACAACATGACTCATTTTCCCTCT  
ACCGTCACAGGTTTAATTCTAAAGTTGCCTCTCTGGGGACAGCCATCTGACCAGAACT  
GCTATGATGATTCTGTTTATTG

>656

TTCAATACTAATTTCTGACAAGAACAGTGAGAATAAACTATTAAGTGCCCTCAAACCTTG  
TTTTTTTAAAGGTCCCTAAGACGAGATAACTTGACAATCAGTTCCATGGACATGGTGAC  
CACAGCCAGCTGGAACCTGAAG

>657

TGAGGCACAGTTCTCCATGGCTATGAGACTCCATTTATGCATCAGGAGTAAAGGGGTCT  
TGTGTTTTTAGGTGAGGTTCCCTGGAGCAGCAGAACCAGGTACTGCAAACAAAATGGG  
AGCTGCTGCAGCAGGTAGATACCT

>658

CCCCTCACAGGTAATGAGAGGGACCTGCCCTGGAGAGAACGTGCCTTCATGATGTCCC  
TTGTTCCCTCTAGGATGTGGATGGTGCTTATATGACCAAGGTGGACCTTCAGGCCAACT  
TGACAACCTGCAGCAGGAAATTG

>659

ACTGCTTTCTCTGTCTAAGTTGTTTTTTGTTTTAGTGCTGTAAGAGTCACTAACCTATTA

TGTCTTGCAGGAGTTGTCTCAGATGCAGACTCAAATCAGTGAAACTAATGTCATCCTCT  
CTATGGACAACAACCGCAGTC

>660

GGAGACCAATTGGGATGAGGAGGCCTAGTGGGGAATGCATATTATGAGAGGGTGTCAT  
ATTCTTTTTTCAGATCTCCAACCTTGCAGCAGTCCATCAGTGATGCAGAGCAGCGTGGCG  
AGAATGCCCTCAAGGATGCCAAGA

>661

TGAGACACCAGGAGAGCTGCTGCTTTGGGGGATGGACAGGGGCAGCAGGAATGCCTT  
TGTGTTTTTCGACAGTGAACTCCTTGGCCTGGGCGAAGCTGTGTGGACCAAGCAAGTCA  
GGAGTGTGGCCATGTTTTCTGAGCA

>662

CAGGGCCTCCATGGCCTCTGTCTGGGCGGGGGGGCTACTTCATCTCTGAGTCTGTACCC  
CTCGTGTCCCAGGCAGTGGAGTGGGAGTGAAGAAGCTGTGTGAACTGCAGCCTGAGG  
AGAAGTGCTGTGTGGTGGGCACTCT

>663

CCAGCTCACTAACACCAGAGCTTTGGTGGGCTCTGGCCCCAAGATTATACCTCCTGTCT  
CTGCATTCCAGCACAACTGCTCCCCAGCCTCCTCGGAGTAAATACATACACCCAGAT  
GACGAGCTGGTCTTGGAAGATG

>664

CGTTGGGGTGACTGGAAGGAGTGGTAGCACCTGGGGCTCCCTGCTCAGGCCTGATGCC  
ACTGCTCCCCAGGGACTGTCCTGGCTGTGTTTGGCTCCGTGAGAGACGACGGGAAGTT  
TCTGGTGGAGGACTATTGCTTTGC

>665

TCTTTGAGTTGCACCTAGGAGGGGCTGCCTCCCTTCTCGGCACCCTGGAGGACCCAC  
CTTCTCCCGCAGGTTTGTGCTACTGGTGTCCGGCCTGGGCCTGGGTGGCGGTGGAGGC  
GAGAGCCTGCTGGGCACCCAGCTG

>666

GGTGGGGCTCTACTCTCCTCTGAGCCTGGGACTCGCCTGGGCCTGATGGCCTTCTGGG  
CTTCTATTCCAGGCCAAATACCTCACCAAGAAAACCCAGGCAGCCAGCGTGGAGGCTG  
TTAAGATGCTGGATGAGATCCTCC

>667

GGAGTGGCCGGAGTTGGTGTAGGGGGCTCCTTCGGGGCCCTGTGAGCTCTCCCTGCCC  
TGTGCCTTCCAGGCCTCAGTGCCCGTGGACGTGATGCCAGGCGAGTTTGATCCACCA  
ATTACACGCTCCCCCAGCAGCCCC

>668

CAGATGAGCTCTGGGCTGACCACTATGGGTGGCACCCAAAGCCAAGAGTCAGCTGAG  
CTTTGCCTTGACAGATTTTTGGGGACATCAGGACAGAACGTGAGTGACATTTTCCGATAC  
AGCAGCATGGAGGATCACTTGGAG

>669

AGCCCCACATCCTGTGCAGAGTGCTAGTGCTGAGGCGGAACCCTCCTCAGAGCTGCCC  
CTTCTCCTCCAGGTTGTTACCCCTTCTACAAAACCTGACCCGTTTCATCTTCCAGAGTGC  
CCGCATGTCTACTTTTGTGGCAA

>670

TTCTGGCAGCTTCTCTTTGAGGCAGGACTTACTTGGAACCTACAGTGGGTCCCTATGTGA

CTTCTTTGCAGGTCCTGAGGACCAGACAGTGCTGTTGGTGACTGTCCCTGACTTCAGT  
GCCACGCAGACCGCCTGCCTTGT

>671

TTCTCTAAGTTCTTGACCTGCTGGTGATTTCATAATGGTTTCTGTTTCATTTTCTCCTGTG  
TCTTTTCAGCCTAGTGGAGGCCAGTATAAGATTCAGATCTTTGAGAAAGGGGATTTTAG  
TGGTCAGATGTATGAAACCA

>672

CTAGGCAAACAGTAATTTTGGTTAAAACCAAAATACGTGTTCTGAATTACTGTTCTGTG  
TTTATTTTCAGGCTTCTGGAGTTACAGTGAATGATGAAGTCATCAAAGTTTTTAATGATA  
TGAAAGTAAGGAAATCTTCTA

>673

CACAGACCCCCACTAGCCGGGGACGCAGCTCAGGCCCCCTACCCCCAACACAAACAC  
TTCTCTCCTGTAGAGGATAAAGCTTGGGGTTCATCCTCCTTCCCTGGATCACTCCACAG  
TCCTCAGGCTTCCCCAATCCAGGG

>674

AGTTTTTCAGGAATCAAAACCTTTGCCCCATCCCACCTCCAGCTCAATGACCATTGCCC  
CTTCCTCAAAGGGACGATCATGGCTTCTCCCCCTTGCACTGGGCCTGCCGAGAGGGCC  
GCTCTGCTGTGGTTGAGATGTTG

>675

TGACACCAGTATCTCATTTGGAAGTACTGTACTTTCTGCCTCTTCTTTTTGTCTGGCCA  
TGGGGTCCAGCTATTGCAGTACAAGGCAGACATCAATGCAGTGAATGAACACGGGAAT  
GTGCCCTGCACTATGCCTGTT

>676

ATTCATGGTTGGTTCAGTGACTGCCAGCGAGGTAGCAGTGGCTCTCATCATAATGGCCT  
TTTCATTCCAGGACCTGGTGGCAAATGGGGCCCTTGTCAGCATCTGTAACAAGTATGGA  
GAGATGCCTGTGGACAAAGCCA

>677

TGTGTCCTCTCGTCCCTTCCCACCTGTCTTCTCCCTCTGTACCACAGCTTAGGTTGTTTT  
TCTTCCCTAGAGCGGGCAGAGAAGATGGGCCAGAATCTCAACCGTATTCCATACAAGG  
ACACATTCTGGAAGGGGACCAC

>678

AGGAAATAATCCTGGCCTCTTGGGGCTGGGTTAGGGTGAAGCTGGGTACCTGACCTGC  
CCACACTCTTAGGAAATGGAACCCTGAACAAACACTCTGGCATTGACTTCAAACAGCT  
TAACTTCCTGACGAAGCTCAACGA

>679

TTTCCTCCAGTTAGTGGGCAAGGAAGTGGCAGCAACATTTCAAGCCTCCTAACCCTA  
CCTGTCCTGCAGCTATGGAAGGGCCGCTGGCAGGGCAATGACATTGTCGTGAAGGTGC  
TGAAGGTTTCGAGACTGGAGTACAA

>680

CCAAGGAACCCTGAATAGCACTGAAAGAGATCTTTTGTACTGGGTCTCAACCACTCCC  
TCCCTCTTCTAGGATTTTCTCGCATCCAAATGTGCTCCCAGTGCTAGGTGCCTGCCAGT  
CTCCACCTGCTCCTCATCCTACT

>681

TGAATTTCTTGGGGAGGAAATGGCAGAGAGGGAGCCTCTCTGAACTATTTGACTTTT

GCCTCCTCTCAGATTTCGTCGTGGACCAGAGCCAGGCTGTGAAGTTTGCTTTGGACAT  
GGCAAGGGGCATGGCCTTCCTACA

>682

CTGGCCCAGGCCCCAAAAGCCCTTTGCCTATCTATGACTTACCTCCTTCTATCTGTTTTTC  
TCTTCCTCAGATTGATGAGGACATGACTGCCCCGAATTAGCATGGCTGATGTCAAGTTCT  
CTTTCCAATGTCCTGGTCGCA

>683

CAGAAGTAGTGGAAGGGGGCAGAGACAGGACAGGCAAGGGGGGCCAGAACAGACAA  
GCCCTATCTCTCCAGCTCTGCAGAAGAAGCCTGAAGACACAAACAGACGCTCAGCAG  
ACATGTGGAGTTTTGCAGTGCTTCTGTG

>684

CAAGGGCCAGTGGCTTCTCTCTACATGACAGACTCAAATTGTGAGGCTGCTTTTTTTCT  
TGTATTTCGAGGTGGCATTGGAAGGCCTTCGGCCTACCATCCCACCAGGTATTTCCCCT  
CATGTGTGTAAGCTCATGAAGA

>685

TTTTTCCCCCTAAATTTAATCTTGTAGCATTTTTGGTTACTCCTGCTTACATATTTGGCTC  
TTTTCCTAGGTAAAGTGGAGGTATACTTCGAATTTTTCCAGAAGGCAAAGCCCAGTTTGC  
TGACATTGAACCCAAATTTG

>686

GGAATGCAGTAGCAGAAGCTCTCTGGTGCTTAGTGAATGAATGAAAATTTTTTTTTTTT  
TTACCTTGCAGGTGAAAAAGGTGTGAGGGTTGAACTCAATAAACCTTCAGATTCGGTC  
GGTAAAGACGTCTTCTAGAGCCT

>687

GGTTTTGAGGAATTACTCATTAGTCTCTGCACATCCACAGACATATAATTACTTTTTATCT  
GCACTGTAGGAATGATTGCAATTAGTAGGATGGCTGTGCTGTATCCTCAAGTTATTGTCTG  
ACCATCCATTTTTCTTTCT

>688

AGCAAGAAGGAAGATAAATATTTTATTATTTTGTTCACCCCCCTCTTTTGTTTACTTCTGA  
ACCAATACAGGTACAATTCTATTCATGGGACGAGTCATGCATCCTGAAACAATGAACAC  
AAGTGGACATGATTTCAAGA

>689

ATTGTGACCATTTAATCAACACAGCAGTTAAATTGTATATTTACTTTCATTGTTTTATATT  
GCTTGGCAGAAAATGAAGACAAAAAGTGATATGATGGAAGAAACATAGATACAAGT  
GCCCAAGCAGTTGCTGAAACCA

>690

GTAAATATTTAGGGGAAATGGTTCTAAATTTACAGACAGAATCTTGTTTTTCTTTTCACT  
ATACTTACAGGCACCAGCTTCTGAAAAAGAAATTGTGGAAGTAAAAGAAGAAAATATT  
GAAGATGCCACAGAAAAGGGAG

>691

GACTGAGGAAATGAATGAATGAATGTCTCCATCTCAACCCTCAGCCTGGTCCCTCCTTT  
TTTCCCTGCAGTTGGTACAGATGGCATTGTCCAGTCTGTTCCCTTCTCGGCCACAGAG  
CTTCTCCTGGCCTCTGCCATCT

>692

GGGAGTGGAGCAACGTTTCAGCCTTTGACCTTGGAAGTGCCAGAGGTGCCCCTAAGCT

TGTGCCCCCTCAGAACAGTGTCCGGGACATCACGGGTGCCCTGTTCAAGCACAGCAA  
GAAGGGGCCTAGAGCCAGCGGCAACC

>693

GATACTTGGGAAATGATGGTTTCCTTGTTTCTGTCTTCCTTCTTTCCTCACCTTACACTA  
CACGGTTCAGGATTTGACACAGTCACCACAGCCATCTCCTGGAGCCTCATGTACCTTGT  
GACCAAGCCTGAGATACAGAG

>694

TATAAGAGGGGATAATTCATGGGGCAGTTAGGGCAGCCCCTGAGCTCTGCTTGTCTCT  
GTGTTCTACAGACACTGTGATTGGCAGGGAGCGGCGGCCCCGGCTCTCTGACAGACCC  
CAGCTGCCCTACTTGGAGGCCTT

>695

GTGGAGGTAGGAGCAACACATGCCCCAGCTTTCAGCCCTGAGCCTCACAGTGCCCTC  
TTCCCTCCTCAGCACAAACAAGGGACACAACGCTGAATGGCTTCTACATCCCCAAGAAA  
TGCTGTGTCTTCGTAAACCAAGTGG

>696

CCCTCCCCCAGGCACCTCCTCCCAGGGCCTCTCCAGCCCTGAGGTCCCATCTCCTCTGT  
TCCTCTTGACAGAGAGCTGTGGGAGGACCCCTCTGAGTTCCGGCCTGAGCGGTTCTCTCA  
CCGCCGATGGCACTGCCATTAAC

>697

AGTCTCTGGGCTGTCTAGGGCTCGGGCTGGGCTGGGCTCTCGTTGTTAATGGTCTTCCCC  
TCATCTTGACAGGAGCCATGTGGCTAGAAATCCTCCTCACTTCAGTGCTGGGCTTTGCCA  
TCTACTGGTTCATCTCCCGGGA

>698

GAAACAGACTTTGCTCTTGCTCTGTCTTCCCATCCCTCTCAACTTGGGGTCCTGAA  
TTTTGCTCCAGGACTTACACCAGAGGATCGATAAGTTCCGTTTCACCCACCTTTGGAG  
GACAGCTGCTTCCACTATGGCT

>699

GGGGGTGCCAGAGCCTGACCGTGCAGGGTCTTCTCTCTCCCTCCACCCTGACTGTGCT  
CTGTCCCCCAGGGCTGGACATCCACTTCATCCACGTGAAGCCCCCCCAGCTGCCCCG  
AGGCCGTACCCCGAAGCCCTTGCT

>700

AACACCAGAGGGCCCAAGGAGCAATCTGCCTGTGACTCCGTGACTCCATGCCTTTCCC  
CATCACTGCCAGGGTTCAACTCGGTGGCCACCGCCAGGATCTTTTACAAGCTGATGCT  
GCGGCTGGGCTTCCAGGAATTCTA

>701

CGCCATCTCTCCTCTCTCCCTGTCCTTGACACCAGCCCAGCCTCACCCCGGCCCCCTCTC  
TCTGCCTTCAGCCACGTGAAAGGCCTGCACTTGAACATGGCTTTGGTTTTAAGCAACT  
TCTTACCCTGACCTCCTCCTG

>702

CATCACACCTGAAGCTCCAGCTCTCTGGTCCCCAGGCCTGAGTCTCTCCCTTGCTCCCC  
GCTCCCGCCAGGCTCTGCTCTGAATGACTCTCCTGTGGGTCTGGCTGCCTATATTCTAG  
AGAAGTTTTCCACCTGGACCAA

>703

TTTCTGGCTGCCCTTTGTCTACACAACCTGCATGTGGCACTGAGAGTGGGGCTTTGTGTTC



TGCGTTCCCAGGAAGTTCTCCCTGGACGACCTGCTGACCAATGTCATGCTCTACTGGA  
CAACAGGCACCATCATCTCCTCC

>704

ACCCCTGCTGTGCAGACGGAGGGGCGCAGGGCCACAGCCTCACCCCTCCGTCGGCT  
CTTTCACCTCCAGGATGAAGGTCTATGTGCCCACTGGCTTCTCTGCCTTCCCTTTTGAG  
CTATTGCACACGCCTGAAAAGTGG

>705

TTATTTTAGTGAAACGATGCAGGTTTAACAGTAACTATGTACTTTTTTCCCTACTGTCTTC  
TCCTTCGTAGGACAAGAAGGTTCTGTTTGTCTCCGGTCATCAGACTGTGCCTCAGGATT  
GTGTTGTGCTAGACACTTCTG

>706

GCACCTTAGTGAGTTGATCATAGAACATGAAATCCAAGTTTCTCTATCTTCAAACCCTG  
CTCCCCTCCAGGTGCGGTTCCCTGGAGCAGCAGAACAAGGTTCTGGACACCAAGTGGA  
CCCTGCTGCAGGAGCAGGGCACCA

>707

CTCTCTAAGCGTGGAGCTCACTTGAGTAGGGTGACGGTGTGTGCAGTGCCAATCATCC  
CTGTTTCCCCAGGATGTAGATGCTGCCTACATGAACAAGGTGGAGCTGGAGGCCAAGG  
TTGATGCACTGATGGATGAGATTA

>708

AGATTTGAATGGAACCTGACATTAAATAACACAACACAGAACCAGATGACCGACTCCAA  
ATCTCCCTGCAGGAGCTGTCCAGATGCAGACGCATGTCTCTGACACCTCAGTGGTCC  
TCTCCATGGACAACAACCGCAACC

>709

CTGTGAACTTTGGGAAAGTTCTTCCCATTCTCATATAAACAGAATCTTTCCTCTTTCCTG  
GCTGCATCAGTATGAGGAGCTGCAGCAGACAGCTGGCCGGCATGGCGATGACCTCCGC  
AACACCAAGCATGAGATCACAG

>710

CTGACCCAGCCCCTCAGAAGGAGACACCTCAGGTCCCAAGCAACCCCACTCTCCTCCT  
TTCTATCTGTAGTGCGCCAATCTGCAGAACGCCATTGCGGATGCCGAGCAGCGTGGGG  
AGCTGGCCCTCAAGGATGCCAGGA

>711

GATCAAATAAATGGGCCATGCAGGATCAGCCTGGCAGATGGTCTCACTGAGTCCTCCTC  
CTTTCCTGCAGCTGTTGTACAAGCAGTGTTCCTCTGGATATGGCAGTGGCAGTGGCT  
ATGGCGGTGGCCTCGGTGGAGG

>712

ATAATACACAGAGGCTTGCAGGCCACTGCTCCCTTCCCCACACCTCTCTCCCTTTTCT  
TCTTGCCACAGGAACTTCGAGAGGAGGAGAGGCGTGCCACCTCCCTCCCTCTATCC  
CCAACCCCTTCCCTGAGCTCTGC

>713

TAGCAGGTGCGGAAAGGGAATGAATCACCCCTTTGCCTCCCCTCAAGTCGTGTGCAATT  
CCTGGGGCGCAGGTAGTAAAGGTGTACAGTGAGGATGGGGCCTGCAGGTCTGTGGAG  
GTGGCAGCAGGTGCCACAGCTCGCC

>714

CTAGGCATGTGGCTCATCCAGGAGATCTGGTTGATCTCCAATAACCCCTGCTTTTTTGCC

CTTGTCCCCAGAGCGGGGTTTGGAGGACCACGAGTCCGTGGTGGAAGTGCAGGCTGC  
CTGGCCCGTGGGCGGAGATAGCCG

>715

GGGCGCTGGGATGCCCTGATCCTCAACCTGGATGCTGGAGCCCTGATCCCTGACACTT  
GTCTACCCACAGCACTCCCTGTTCCCAGAAAAAATGGTCTCCAGCTGTCTCGATGCAC  
ACACTGGTATATCCCATGAAGACC

>716

AACATCCTGGTGGTAGAGGGGAAGGGAGGAGGTCAGACCTGTCACTCTCCTCTGCTCT  
CCTCTGGCTCAGAACTTCCTGAATGCTGGCAGCTTTCCTGAGATCCAGGGCTTTCTGCA  
GCTGCGGGGTTACAGGACGGAAGC

>717

TGGCTTGTGGGGGGAGGTAATAGTGGGCGGGATCTACCTGTACCAAGTCCTGCTCACT  
CATGCTGCTTAGGATCCGAGGCACCTGCAGTACGTGGCAGATGTGAACGAGTCCAACG  
TGTACGTGGTGACGCAGGGCCGCA

>718

TATGTGGAGCAGGGGCAGACATGTGGTCCTAAAGGCAGATATGGGACCAGTCAATTC  
CTCTCTCTGCAGCCCAACAAGCTTCGAAATGGACACAAGGGGCTTCGGATCTTCTGCA  
GTGAAGATGAGCAGAGCCGCACCT

>719

TGAGGGGGGCGTCACAGCCACGCCCCCAGGACCTCTCGACCTCAAGCTCTCTTTCTCT  
CCCCACCCCAAGTACGGGGTGCAGCTGTACAAGAATTACCAGCAGGCACAGTCTCGCC  
ATCTGCATCCATCTTGTTTGGGCT

>720

GGGTATGCAGGCCCTGTCTTACGGGTACCTGGGCCCTGTTCTGACCTCTCTCCTCTCCT  
TCCATCTCCAGAGAAGTGCCTCAGATAATACCCTGGTGGCCATGGACTTCTCTGGCCAT  
GCTGGGCGTGTCAATTGAGAACC

>721

ATTCCCAGTGGGGAGTAGATGGTATAGGGGTCCCCTCCCAAAGTGACCGCCCATGTCCT  
TCCCACCACAGCCATCCACCGCACCCAACTCTGGTTCCACGGGCGCATTCCCCTGAG  
GAGAGCCAGCGGCTTATTGGACA

>722

AGAGACTGGGGTCCAGGTGGCAGCCATGGTCCTTGGGTAGTAATGCTGCCCATCTCCT  
GTCTTCTGGCAGCCTGTTCTGGTCCGGGAGAGTCAGCGGAACCCCCAGGGCTTTGTC  
CTCTCTTTGTGCCACCTGCAGAAA

>723

CTGGCCCAGGAGGGAGCTTCCCAAGCCTCGGGCCCCCTCCCTGAACTTCCACCCCCTTT  
ACTGTACCCCAAGAGCGAGGAGGAGGGTCGCCTGTACTTCAGCATGGATGATGGCCAGA  
CCCGCTTCACTGACCTGCTGCAGC

>724

GTGAAGGAAATTGACTTTGTCAATGACCAGATTTTTATATCAACCTTCCTTTTTTCTGTC  
CTTTCTCTAGCACTATTTAGGAGCCTACGTTTTTATTATCTTCACCGGCTTCCTCATTACC  
TTCTTGGCTTTTACCTTCT

>725

ACGATCAAGGAACGCAGCCTTCCTGTTGCTCTTAGCAGTAACCAGGCATGTCCACTGG

CTGTTTTTGCAGTTCTTTAATTCAGTGCGGCTCTGGGATTTTCATCGAGAACCGAGAAAG  
CCGGCATGTCCCAACAATGAAG

>726

CTAGGCAACCAGTAATTTTGGTTAAAACCAAATACGTGTTCTGAATTACTGTTCTGTG  
TTTATTTTCAGGCTTCTGGAGTTACAGTGAATGATGAAGTCATCAAAGTTTTTAATGATA  
TGAAAGTAAGGAAATCTTCTA

>727

TATTATCATAGTCAGTCTTACCTTTGTTTTTCTTATAAATGGGATTCAATAATTTTTTTTTT  
TTCTGTAGGGCTCCTGAAAGTGCACCTTTAAAAGCAAGATGATTTATGCTAGCTCTAA  
AGATGCCATTAAAAAGAAA

>728

ATATTTGGGGCAGAGAAATTATCTTTATTAATTATAATAAGTAATAGGATAATGTTTTT  
TCTTTTATAGGTATTAAACATGAGTGGCAAGTAAATGGCTTGGATGATTAAGGACCGTT  
CGACACTTGGAGAGAAATT

>729

TTTGACTTCTCAGAAATATATAGACCAACAGTGGTTGCCTTTTTTTCATTTTCACTTCTCT  
TCATTCTTAGATCTACGGAATCCAGAGGCAGCATTGTCTCCAACCTTCCGTAGTGACAG  
CCCAGTGCCTACTGCACCCAC

>730

GTTAGGATTACCCTTATTTTCAGTTCACGGTCAGTGTCTTATTGCCCATACCTCCCCT  
CGTTCTCTAGCCAGATGCTCCTGCCACTCAAGATGGGGTAGAAAGCCTCCTGCAGAAG  
TTTGCAGCTCAGGAGTTGATTG

>731

TTTGCAGGAGTTGGTCTAAGAGCCAGTTTGATCTATAAGACATTTTAAGTCCAAGGCTAC  
TTCTGTCACAGGTCAGTCAGGAGATCCTAGAGCTATTAAATACTACAACAGCCAAGGA  
ACAATCCATTGTTGAAAAATTC

>732

TCATTTGGAATTTGAACTGTTGGATCTACATCTGGAGCACCATCTTGATTCTCCCTTTTT  
ATTTTCCCAGACGAATTATCAATAAACACACTGATGAGTCTTTAGGTGACTGCTCTTTCC  
TTAATACATGTTTCCACATG

>733

GAAAAGAGGGACTCGGGCCATGAATCTCAGAGTTAAAGTAGGGAAGATGACCAAATA  
CCACTTTATGCAGTGGATCTGTTGTGATATCCGCTACCTGGACGTCAGTATCTTGGGCA  
AGTTTGCAGTTGTGATGGCTGACC

>734

TCTATAAATGGTACTACCCCTAAACTGTAAAAGTTTGGCTAAAATTCTAGTTCTTTTTTA  
TGCCCCACAGGTATGAACGGGTAGATGAAATTATTTGGGTGAAGACAAATCAACTGCA  
ACGCATCATTCGGACAGGCCGT

>735

TAAACATAATAGAAAGGGCTAGAATTGCAATCTTGTGTAACCTAAAAAGCAGCTAGTTT  
TTATTTCTAGGTTTCGTTCCACCAGTCATAAACAGATGAAATCTATGGCATGATTGAAA  
GACTATCTCCTGGCACTCGCA

>736

CATTTTTTAACAATATTAAACCCTCTAATTCCAGGATTTCTGGTTTGCCCTCCTTTTACA

CTGTTTCAGGATCACCTTGGAACCAACTGGATGGGATCCACCTACTAGACCCAGAT  
GTGGTTGCACGGTTCAAGCAA

>737

TGTTCTCTTTTTGGAAAGCTTTGTAATATAAATATGGAATTGTGTTTTATTTCCCATTTTTT  
ATTTTCAGGTGTCTGCTTTTGGGGCAGAGTTTTCATCGGAGGCATGCAGAGAGTTAGG  
CTTTTCTAGCAACTTGCTTT

>738

TTTGTCTTAGATGAGGCTGAGAAGGTTGTTTCTGAACAGAAAGTAATGATGACGTCCC  
TCTTTTTTGTAGTATGTCCGTGGTTCAGACCCTGTATTAAAGCTTTTGGACGACAATGG  
GAACATTGCTGAAGAACTGAGCA

>739

TAAGACACTACAGTGTGTGTCATAACCAAGACCTGATCAGGGAGTAGTTACTTCTCTTC  
TTTTCTTACAGGAAACATGGTTCCAAAACCTGTTCACTTCCCAAATTTGTCTGCTTCTTCT  
GTTGGGGCTTCTGGCTGTGGA

>740

TAAGACACTACAGTGTGTGTCATAACCAAGACCCGATCAGGGAGTAGTTACTTCTCTTC  
TTTTCTTACAGGAAACATGGTTCCAAAACCTGTTCACTTCCCAAATTTGTCTGCTTCTTCT  
GTTGGGGCTTCTGGCTGTGGA

>741

TGAGACACTATAGAGTGTGTCATAACCGAGACCGGATAGGGGAGTAGTTACTTCTCTTC  
TTTTCTTACAGGAAACATGGTTCCAAAACCTGTTCACTTCCCAAATTTGTCTGCTTCTTCT  
GTTGGGGCTTATGGGTGTGGA

>742

TGAGACACTATAGAGTGTGTCATAACCGAGACTGGATCGGGGAGTAGTTACTTCTCTTC  
TTTTCTTACAGGAAACATGGTTCCAAAACCTGTTCACTTCCCAAATTTGTCTGCTTCTTCT  
GTTGGGGCTTATGGGTGTGGA

>743

TGAGACACTATAGAGTGTGTCATAACCGAGACCGGATCGGGGAGTAGTTACTTCTCTTC  
TTTTCTTACAGGAAACATGGTTCCAAAACCTGTTCACTTCCCAAATTTGTCTGCTTCTTCT  
GTTGGGGCTTATGGGTGTGGA

>744

GTTAGGGAATGGGGAAAGGGGAGCGAGCCAGAGAAAACCTGACGCCCTCTTCCCTGC  
TTCTTCCCTCCAGGGACCCCTCGGAGGAGCATTCGCTGCTGGTGAATTGATTCGACCTG  
ACTGCCGTTGGACCGTAGGCCCTG

>745

CCAGCCCTAGCCCTGCCTTCCCAGAACCGTAAGGGTCTATCTCCACGGACACTGTGCC  
ACCCACCCCCAGATGAAGGAGTCCGCTGCCCCGAGTGCTACAAGAAGCCTGGATGTTCT  
ACAAACATACTCGCAGGAAGGAGT

>746

TTCTTCCCCTGAGCTACAGCTACATTCAGGGACCAGGCTTGTAACAACTGACTCCCCACT  
TGTTCCACAGGTTCCGCCAGGTGCGGCTGAAACACCGGAAGCTCCGGGAACAAGTG  
AACTCCATGGTGGACATCTCCAAG

>747

TGCCTTACGCTATGGAGTAGGTGGGGGTCGACCCCAGCCCCGACACCTCTGATCCTCTC

CTCCCACCCAGATGCACATGATCCTGTATGACCTGCAGCAGAATCTGAGCAGCTCACA  
CCGGGCCCTGGAGAAACAGATTG

>748

CCTCGGTGTGTCCCACTCTCACTCTCCCTCTTACTGGCCTGCCTCTCCATCAGTCTCTCT  
GTCTCTCCAGGGACCCACGAGGAGGGAACCAAGGCTACTTTCCCAAGTACTGAGGT  
GGTGGACATCGTCTCTGCCACTC

>749

CCCCTCCTATCCGTCTCCCACTCAGGGGCTGGTGCTGTGGCCCCGCTGACCCCTCCCC  
TGCCTCCTCAGCCCCAGGATGGGTGAGTTCAACGAGAAGAAGACAACATGTGGCACC  
GTTTGCCTCAAGTACCTGCTGTTT

>750

CCCCACCCCCACCCCTCCCGGGCCACCATCAGACCTGGGCAGATGCGGTGACCTTTGT  
GACTGCTTGTAGCTGGCTGGCCTGGCTGTCATGGCAGTGGGCATCTGGACGCTGGCCC  
TCAAGAGTGACTACATCAGCCTGC

>751

CTGCTCTGAGGTGCACTAGGTCTAGGCACTAGGCCTCAGAACAAGGGTGCCCTTGTGC  
TGCCCCCCCCAGTACTTCATCCTGCTCCTCATCATCTTTCTGCTGGAGATCATCGCTGGT  
ATCCTCGCCTACGCCTACTACC

>752

CTGGGGCTCTGCCAGCCCCACCTTGGAAGGTCTTAGACTGAGGCTGAAGTTTCCTGCA  
CCCCAACCCAGCTGAACACGGAGCTCAAGGAGAACCTGAAGGACACCATGACCAGG  
CGTACCACCAGTCGGGCCATGAGG

>753

CAGGGCCTCCCTGGACCTCTGCAGGAGCCTCTGGCCCCAGGTCTCAACCCCAGCCTTG  
TTCTTGATGCAGTTCCACTGCTGTGGCAGCAACAACCTCACAGGACTGGCGAGACAGTG  
AGTGGATCCGCTCACAGGAGGCCG

>754

GCTGGAGGCAGTAGGGGCCAGTGGGAGGTGCCCCCTGGGCCCCGCTTCAACACCCAT  
CCGCGCCCCGCAGGGCGGCTGCATCACCAAGTTGGAGACCTTCATCCAGGAGCACCT  
GAGGGTCATTGGGGCTGTGGGGATCG

>755

GGGACACGGGGCAGGGCGGTGGCTGGTGGCCCCATGACGTCTGCTTACGCCCACCCG  
GCTCTGCACACAGGTCTTTGGCATGATCTTCACGTGCTGCCTGTACAGGAGTCTCAAG  
CTGGAGCACTACTGACCCTGCCTTG

>756

TTTtagggagccctagcagtacctagggtcagaggggaggtctgacttgctccccaaaa  
ctcatccctaagaacatgctcctgccagctggactaagacaacgtgaccagacaaaga  
agagcccaacggggccactggacc

>757

AAGGAAACCTGGAGGCCAGGATCTTGGGAGAAATTACCTCTACCTGAGCCATCCTTCA  
TCTCCCCATCAGGGAAACCCTATATTACGCCCAAGAGGGAAATCCAGCAGAGGAGCA  
GATACCCCTGGAGCCTGAGCTGGA

>758

AATAGGTAGGAGGGAGGCTTGGAACAGGTTCCCTTCTCATTCCCTGTGACTCCTCTTCTT

ACCCTCTCCAGCAATTCTGGACATGTACACACTGATGAGTAACAAGCAATACTATGATG  
CCCTCTGCAGTGGAGAAATCTG

>759

GAAAAGAAAACCAATGGGGAGGAGATTATGGGGAACATGTTGGGGTTCCCTTCCTGCC  
CTCATTCACCAGGTGTGGTACAGCCTGACAAGTATAAGCCAGTGCCGGATGAACCCCC  
AAATCCCACAAACATTGAGGAGAT

>760

ACCATAACACCGGATAACCACTGACATCCGAGAGTCCCTTAGCCCACCATCTCCTATTC  
CCCTCCGATAGGACATCCCAATACCCATGCTAAGTGAGCTGTGTGAGGCAATGAAGGC  
AAATACCTATGTGCGGAGCTTCA

>761

TCCTGTTCTTTCTTTCTCAGTCATCTGTGAACTGTTCCCTAATCCTAACCCAAGTCCC  
TACTACCCAGGCAGTGGCTGACATGTTGCGTGAGAATCGTAGCCTCCAGAGCCTAAAC  
ATCGAATCCAACCTTCATTAGCA

>762

GGGTCTGTGATGTGGGATGGTAAACAGCCCAGAGAGGGTGACTGTCAGCTTTTGCCTC  
TCCCTCCCCCAGCGCCAGTGGCCTGGTGATGCAGTGGAGATGGAGATGGCCACCGTGC  
TAGAGCAGTGTCCCTCTATTGTCC

>763

AAGAATTAGACAAGGATGTTTATATAAACACTTTAAATGTATTTGATATAAAATTTTTATT  
TCTTTGTAGACCCAGAAAACCCCAGAAAGTGGTGATACAGTGGAAGTACAAGTGAATGG  
AAATCTTGTGAGAGAACCTGA

>764

TCTGCATTGTATCATGGACAAAACTGGTGGTAGGAATCAGTGTTTTGTTTTCTTTTCAT  
GCTTCTACAGAGAATCAGCTGTTAATCTAGTGAGGAGTGGCTCCTATACCCGGCAGCTA  
TGGAGGGATGAAGCAAAAGGA

>765

TCTGTGCCAGTGCTTTGTTGTATAGCATGCCTAACCATTTCTTTCTGCTTGTATCTTTTT  
AAATTTTCAGGACTCCTCACAAATCCCAGGCCGACACAACAGCAGAGAAAACAGCAGA  
CAATGTCTCTTCTAGCACCCCG

>766

AACACTTTGTCAATTCCTCAAGTATATGCAGCAAAGATCTTGCTTTTGCTATTACTTTTTT  
TCTCTGCAGGTCTATCTGACTCCTGTACGGGATGAGGAAGCAGAGTCTTTACGGAAA  
GCACGCTCCAGACAAGCTCGG

>767

TATTCCTGATCAATCAAGAGTTATTCCATGGTTAGTGTGAAACAGCCCTGATCTTGTGAT  
ATTTTCCCAGGGTGTACCCCTAACAGACCTTCAAGAAGCAGAAAGGACATTCAGCCGG  
TCGAGGGCAGAGAGGCAAGCTC

>768

TATAAACCTGCTGTCCTTACTCTTTAGATGGACTTGATTTCTAATATCTCATATTGTGGAT  
TATTTCCAGCCTATCTGTCATCGCCTGAGGTGCCAGCTCAGCCAGACAAACCCACCAC  
GCCAGCATCTCCTTCTACGT

>769

AGACACAGGCCCTCCACAGTGCACATCCCCAGATTCTTAAAGTTCATACTTTATTTTAT

CTCTGGCCAGAGAATGAAGAAGCAGATTTGGATGAGCAGTCCTCTAAGAGGCTGTCCA  
TCCGAGAGAGGAGGCGGCCCAA

>770

CTGAGCATTACCTTCTCCCCACTACTTTGTTCTCAAAACCAATTTTATCTTTAATATTAT  
CTCCACAGGTTGGAATCGGGAGGTAGTAATCCTACAACCAGTGATTCTTACGGTGAC  
CGGGCTTCAGCAAGAGCCCGT

>771

GCATTCTCATGTGATGAAATGGTGTGAGTTCTAACGCGAACGCTGATCCTCTTTTTTCC  
CTCTCCTCTAGCTCTATGAGAGTGCTCTGACTGAAAACCAAAAACCTGAAAACAAAACCT  
TCAGGAAGCCCAGCTAGAGCTAG

>772

GGCCTGGTCAGGGAGGGCCAAGGAGGATCCTGCCAGGCTCTAACTCACCTTTCCTCT  
GTCACCCTACAGGTGTTAACAGAACTGAAATCCGACAACCAGAGGCTGAAAGATGAA  
AATGGTGCCCTCATCAGAGTCATCA

>773

ACTGGAGGTGCAGGGGGCCGGACTCAAGCCCAGAAGCTGCCTGCACCAACCACCCAA  
CTTCTCTCCACAGCCCTGGAGCCCACCTCCCAGAAGCCCGGTGTGGGGGCGGGCCAC  
GGGGGAGATCCCAAGCTCAGTCCCCA

>774

AGTGGTCCCCCTGTCTCGCTTCCAGCCCAGAACCATCTCTTCTCTCCCATCCCTGCCCT  
CGGCCCCACAGTCCCACGCTGCTGGCTCCAAGCAGCACGAGAGCATCCCGGGCAAGG  
CCAAGAAGCCCCAAAGTGAAGAAGA

>775

AGTGGGCACTTCTTGTTAAATTTACCATTGAGACCCTGGTAACACTGAAGTTTGTGTTG  
ACTTTCTGTAGGTGTTTTACAGTCCTGTGTTTGGTATGGAGAGTGTGGAATTGCATAT  
GGGGACAAGAGGTACAATTGCG

>776

GTTCACTGAGGAATGTTGACCTTACTCTAACTGTTGCCTACTCCCGTGTCTGTGCTCTTT  
CACCTGAAAGGAACTCTGTCCAGGATTCTTCTTTGGCAATGTCAGTCTCTGTTGTGATG  
TTCGGCAGCTTCAGACACTAA

>777

TATTTAAAATCGTTCTTGCTGGCCCTATTATGTGTGAGATCATGCAGAATATAATTTACTT  
TTCTTTAGATGTCCATCCTGTTTTTATAACCTACTGAACCTGTTTTGTGAGCTGACATG  
TAGCCCTCGACAGAGTCAG

>778

TTGTAAGATCTTGCCTCGTGAATTACAGCAAGCATCTTGTCTCCTTTTTCTTTGGGTTT  
CCTCTTCTAGCAATGTACAATGCCTGCCGGGATGTGGAGGCCCCCTCAAGTAATGACAA  
GGCCCTGGGACTCCTGTGTGG

>779

GTTTAAGTATAATACAAAATTTTGGATGTTTTTAATTGAGATTTGTACTCAACACAATTC  
CTTTCTGTAGATTTTCCAGTCCATGGGATGGAGCCCATGAACAATGCCACCAAAGGCTG  
TGACGAGTCTGTGGATGAGGT

>780

TCCCTGTTCCGACTTTCAGGAACGGCTTGGCTCTTAACCTCCACCTTCCCTTCTCTCC

CGTTCTTCCAGGAGAGGCGTCCTGCTGTGACCCCTGTCAGCGCAGCATTGAGGGCTGC  
TTGAGGCGGCTGTTACACGCTG

>781

CTGATTAATCAAGATCTGAGAGAAATGTGACGTGTTTCTGGGTTTGCTTATTTTTAAAAT  
CTTCTTTCAGGTTCTTGACTTACAAATAGCCATCGAAAACATTACTGCCTCTTATGACAA  
TGAGACTGTGACACTTCAAG

>782

TGTAAATGTTTAGGTCCCTGATGTCTTGAGGCCCTTCTAACTGGGAGGTGTTTTCTAAA  
CTTTTTGGCAGGGCTCCTGCCTCTCTGAATGATACAAGTTTGCTCCATGACCCTTGCT  
GGGTACGTTTGGTGGACCAGTG

>783

TCCCCTGGTATGTGTCTAATTTTCTGCATGCTTGTAATCTGCTTTTTGATGTCACATTTTT  
CCTTTCTAGATCAAACTACAATAACGCCACTGCCCTTG TGATTACCTTCCCTGTCAATA  
ATTACTATAATGATACAGA

>784

TTAGGGAGAAGTTTCTTACTTAGCTGTCAGTTAGTTTAACTAAAAATATAACATTTTGCT  
TACCTTTTAGGTTTATTAATTTGTGAAAACTACAAGAATCCCAATCTGACCATTTCT  
TCACTGCTGAACGAAGTATT

>785

GACCTTTTAGTAACAAGTGGGACAGACAACCCTGTAAC TAATTGGTGATTGTGTCTGTC  
GCCTCTCTCAGGTGGATTCTGAAGGTCTCACTAGGCATCGCGGGCATCTTGATCGTGCTG  
AGCTCGGTGGCTTGCTCCTTGG

>786

CAAGGCAGCAAGAAATGGCGTTGTTATTGAGAAATTTAATGTCGCATAATTTTTTTTTT  
TTTTTTTAAGAGAGATGAACGTCTTCAAGGGGAAACCCTGGATCAGCAGCTGGGCAGG  
GTCCTAGGAGAAGTGGCTCCCA

>787

TGAACATAAGACCTGCAGAGAGCCCCGGCTGTAAACAGAAGTGACGCAGAGCCCTT  
CTCTCCCCGACAGGAGCATTGTCCGTGATGCCAGCCGTGCACACCTTCTCTCTTTGC  
GGGATTGGCAGTCTTCATTGACTT

>788

TTTAATTTGAGTCTAGAATCTAGAGGAAGCAGCTAGCGGGTATAACCTTTGTTTCCCTC  
TGTCCTCTCAGAAAAATCGGCTAGACATCTTTTGCTGTGTGTCAGAGGTGCTGAAGATGG  
AACAAGCGTCCAGGCCTCAGAGA

>789

AAGATTTTATTTCTGGTCGTAAGCTTATTTACTAAGCAGTCTCTGTCTTATGATTCATTTG  
TTGTTCCAGATAGCAATATTTGTGGGTGTTCTGTCAATCAGCATCGCAGTCCTGAACAA  
AGTAGATATTGGATTGGATC

>790

AAGAAAAAGTACTGAACTAAAGACTTCCTCCCTGTGGAGCAGGTCAGTAACCCTGTC  
TGTCCTCTCTAGTACCCGAATAGGCTTCGCCCCCTCGTCCTGGATCGACGATTATTTTGA  
CTGGGTGAAGCCACAGTCGTCT

>791

ATTTTAAAATGTTTTACAAAAAATCTGGAGACCTATTCTTCTAACAGTCCTCCCTGCATG



TCTCCGCCAGTGGTTGACCCTGCCTGCGTTCGCTGCAGGCCTCTGACTCCGGAAGGCA  
AACAGAGGCCTCAGGGGGGAGA

>792

TCAAGTGCTCAGATTCTGCTGATATTTTGCAAGACCTGGACTCTCTTGACACCCAGGAT  
TCTTTCCTCAGGGGACATGCTGCCTATAGTTCTGCAGTTAACATCCTCCTTGCCATGGC  
ACCAGGGTCGGAGCCACGTAC

>793

GTGACAGGATGAACACGCAGTGTTCTGGGAGTGAGAGCGAGCTTTAATGAGGCCTCCC  
CTCTCCCCTCCAGTGTTTATGTCTTCTACGAACAGTACCTGACCATCATTGACGAC  
ACTATCTTCAACCTCGGTGTGTCC

>794

TCAGAACGGGGTGGCTGCCTAGGGTCTTCAACAGGAAGAGAGCCATCCTAAAGGAAG  
TGCTTTATTTAGAGCTGTGGCATCTCCGTGGAGTTCTGCAGCCACATAACCAGAGCGT  
TCACGGTGAGCATGAAAGGCAGCC

>795

TGTAAGGAAGTGTTTTTGTTCATTACAGGTTGGTAAAAGTGGTTTCTAACACAGTATC  
TCTTCTTTTAGGTGTTTCAAGTGAATCACACTTACAAAATTTGGAGGGATTGTGGTGTG  
GCTTTTGCCAAATCTCAAATTT

>796

GTGAGCCACTATGCCCAGCCAACTAGCTCCCTTTCTCCTGCAGAAATAAGAAAAAGTC  
TCTCTCTCATAGGGCCATCAGTAAATAAGCCAAAAGTTGTGCCACTGAAGAGCGATA  
CAAAGGAACAGAGCGCGAACGGCT

>797

GGCTCTGAATTTTTCTAAGAAAAAATGGTAACTATCACTTGTTACTACTAACCACAAAA  
TTTTCTTTCAGAACGCTCCAGAATAATCAGTTGAAAACAGTACCCAGTGAAGCCATTC  
GAGGGCTGAGTGCTTTCAGTCT

>798

GTTGTGAGACTTGAAGTACTCATTTCACTAGAATTTGTTACTGAACATGGTTGTTTTT  
GTTTCTGTTAGGCGTTTAGATGCCAACCATATTACCTCAGTCCCCGAGGACAGTTTTGA  
AGGACTTGTTTCAAGTACGGCAT

>799

CATATAAAACAATGATAATAGTTGCCAATGGGAGATGGAAAAGTCATTTTATGCTTTTTT  
TCCCCCTTAGGCATCTTCATAACAATAAAATTAGAGGCCTGAGTCAACACTGTTTTGAT  
GGACTAGATAACCTGGAGACC

>800

CAGTAGATACTTGGGTTTTATTTTCGCAAGAGGATAATGCATTTCAAATACTTTTCTCCT  
ATCTTCTAGAGGATTTTATAGTAATTCTATTTCTGTTATCCCTGATGGAGCATTTGATGG  
TAATCCACTCTTAAGAACT

>801

TGAACATAGAGTTAATATTAGAGTGCTTGTGAACATATGAAAATTTTACTTTTTTTGGAT  
ATTTTCACAGACATTTGTATGATAATCCTCTGTCTTTTGTGGGGAACCTCAGCATTTACA  
ATTTATCTGATCTTCATTCC

>802

TATATGGGAATAAATTTTGCTTACTATCTTGAGTTGAATTATTTCTTACATGAATAATGTTT

TTCCGCAGGACTTTGACAGGTACAAAGATAAGCAGCATACCTAATAATTTGTGTCAAGA  
ACAAAAGATGCTTAGGACT

>803

TCTTTCCTCCTCCTCCTGTTCTCTTCTTTGTCTTTGTCTTCGTCTTCTTCTTCTTTT  
TTATTTAGTTCTTTACAGCGTAATCAAATCTACCAAATAAAGGAAGGCACCTTTCAAGG  
CCTGATATCTCTAAGGATT

>804

AGTATAGTCTAAGTAAGTGGCATTCTGAGTGTATTATTTGAAAGATTAACATGTTACTCTT  
ATAATTGCAGAGATCTGAGTAGAAACCTGATACATGAAATTCACAGTAGAGCTTTTGCC  
ACACTTGGGCCAATAACTAAC

>805

AATACGTGTACAGATGTTTTATGTGATTTATATATTGGGCATTAACTTGAAGTCTCATTC  
ATATTTTAGAGATGTAAGTTTCAATGAATTAACCTTCCTTTCCTACGGAAGGCCTGAATGG  
GCTAAATCAACTGAAACTT

>806

TACTTTTACAAAACAAAACCATAACTGCGGAGTTGCTGTTCAAGTGTAGATTTTACAAC  
TTTTTTTCCAGGTCTTTATCAGTACCATATGCTTATCAGTGCTGTGCATTTTGGGGTTGTG  
ACTCTTATGCAAATTTAAAC

>807

TTGCAGGAAAATATGGTTCTTTTGAGTTGCATAAGGTTTAAATTAAACATGCTTTGTGTT  
ATATGTTCAAGTACTGCTGATGCAGCAAATGTCACAAGCACTCTTGAAAATGAAGAAC  
ATAGTCAAATAATTATCCATTG

>808

GCCATATCATTTTCTAAATTGTTTTCTAAGTTATCTTTATTTCTCTCTCTGTGTGTGTT  
TTTTTTAGGTGCTTTTAAGCCCTGTGAATATTTACTGGGAAGCTGGATGATTCGTCTTAC  
TGTGTGGTTCATTTTCTT

>809

TACCTTATACACAAAATATTTATGTTCTACCTGCCTGTGAAACGTCTAAAAGCCTCTCCT  
CTCTCTGCAGACAGAGCACACTCCTCCGTATGATGTGGTACCTTCCATGCGACCAGTGG  
TCCTAGTGGGCCCTTCTCTGA

>810

GGCATACACTTCTATCCCCTTTGATTAGACCAATAACCTTAAGGTCTTCTGTGACTTTTT  
CCTCCAACAGGATATCCATCACAAGGGTCACCGCTGACATCTCGCTTGCCAAACGCTC  
GGTATTAAACAATCCCAGTAAG

>811

AGAAACAGTATACCATTTTACTTTATCTTAAAAATACTGCACTTTAACTGAATTGTTTCG  
CCCTTTACAGCGGAAGTTCAGAGTGAAATCGAAAGGATTTTGAAGTTGCAAGAACAT  
TGCAGTTGGTGGTCCTTGACGC

>812

GTCAATAATGTACCTTGTACTTTACCTGGATGTAGTTATTACTCTGTAAAACTCATTAT  
CTTTTACAGGTTTTACAAAGGTTAATAAAATCTCGAGGGAAATCTCAAGCTAAACACCT  
CAACGTCCAGATGGTAGCAG

>813

TCTTATGGAGGTGGGAAGGGGGTGAAAACCTGGGCTGGCATCAATGTGGTCTGGAATGT

CTGCCTCTGCAGGAGCTGTTTCGATGTGATCTTGGATGAGAACCAGCTTGAGGATGCCT  
GTGAGCACCTTGCCGACTATCTGG

>814

CACTTGCTCTGGGACATGTTCTTTACACACTGACCTTGGTTAACGCCTGGTGTGCTCCT  
TTCGCTGCCAGGGTTCTCAAGGTGATCAGAGGACTGATCGCTCCGCTCCTATCCGTTCT  
GCTTCCCAAGCTGAAGAAGAAC

>815

CGGCCGCCGCCCCGCCCTCTGGCGGCAGCGCGGGGTACGGCGCCGCCTCTGAGCGC  
CATCGTCTCACAGGTGCAGTCGGAGATCCGCCGTGGCTGGCACCACTGCCGCCTGCGC  
CGCAGCCTGGGCGAGGAGCAACGCC

>816

TGACCTCCTGCCCCGGCAGGACCTGAGTGTGAGGGTCTGTCCCACACTGACACCCTTTC  
TGCTCCTCCTAGAACCGTACGGAGTCCCCAGAACCTAATGCCACAGCGACCCCTGCGA  
TCCCCACTATCCTGGTGACCTCTG

>817

GCGGCTGGAGGTCCTGAGGGGCTCGGGTGCCCCTCGAGGGAGCCCTGACCCTGCCAC  
CCCCTCCCCACAGCACTACCGAGGACGGGAGGCCCTGCAGGTTCCCCTTCGCTACG  
GGGGCCGCATGCTGCATGCCTGCAC

>818

CTCCAGGGTGGTGGGGTGGGGTGGGGGGCCTCTGCCTGGGACCCCCATGCACGCAGG  
TGTCGCCCCCAGGTGTGCCACAACCTACAACCTACGACCGGGACAGGGCCTGGGGCT  
ACTGTGTGGAGGCCACCCCGCCTCCA

>819

GCAGAGAATGTCACAGAGGGACCCTGAGCCTCCCAGTCCGCCCCCTCACATCCCCTCCC  
GCATGTCCCCAGCTGCCCTGGATCCCTGTGCCTCCGGCCCCCTGCCTCAATGGAGGCTCC  
TGCTCCAATACCCAGGACCCCCA

>820

AGTGCAAGGGCAGGGGCCCTGCACGGGGACAGCAGGTGGCAGGGTGTGAGGGCTTACT  
GTGCACCCCTCAGAGAAATGCTTTGATGAGACCCGCTACGAGTACCTGGAGGGGGGC  
GACCGCTGGGCCCCGCGTGCGCCAGGG

>821

CCCCGGCCCCGACTCCGCTGTCGTGGGGCACTGCGCGGCCCTGGCCCAGCTCCTCGG  
CCCTGCCCCCAGCTTGTCTGAGCAGCCCTTGCCCTGAACGGGGGCACCTGCCACCTGAT  
CGTGGCCACCGGGACCACCGTGTG

>822

CCCCGGGGTGCCCTGGGGCAGTGCCGGGTGGACCCACCGTGGGGCCGGCCTCACTGCC  
CCTCTGCCCCGAGAGCCTGATGAGCGCTGCTTCTTGGGGAACGGCACTGGGTACCGTG  
GCGTGGCCAGCACCTCAGCCTCGGG

>823

GATGCCCCCTCCCCATGCCCTCTTCGAGGGGCAGTGTGACTCCCTGCCAGCCCCCACTT  
ATGCACCGCAGGAATCCGGACAATGACGAGAGGCCCTGGTGCTACGTGGTGAAGGAC  
AGCGCGCTCTCCTGGGAGTACTGC

>824

AGGGCCTGTGTGTGGAAGGGGGCTGGCCCTGTGAACCCCAGGGGTGTGACCCGGTGA

CCTTTGCTCCCAGAATCCCTCACCAGAGTCCAACTGTCACCGGATCTCCTGGCGACCC  
TGCCTGAGCCAGCCTCCCCGGGGCG

>825

GGGTGGGGAGAGGTGAGCCCGGTGGCTGGGGGAGGGCTGGTCCATGCAGCCTCCAGC  
CCCCCTTGCACAGCCCCCCCAGGGACAGCGTCTCCGTGGTGCTGGGCCAGCACTTCTT  
CAACCGCACGACGGACGTGACGCAG

>826

ACCACGGGGCCCCGACAGCCTCCCGTTCAGCCCGCACACCACAGGCTGACCCTGGCCA  
CTCTTCTGATCAGTCCTGATCCGGCTGAAGAAGAAAGGGGACCGCTGTGCCACACGCT  
CGCAGTTTCGTGCAGCCCATCTGCCT

>827

CCCAGCGTCCGCCAGGTGGACAGGTGGCCAGCCACAGTGTGGTGTCACGCTGAGGGC  
ATTGTGTCCACAGACGTGAGCGGCTACTCCAGCTCCCTGCGGGAGGCCCTGGTCCCCC  
TGGTCGCCGACCACAAGTGCAGCAG

>828

CACTTGGGGTAGAGGGGTGTCCCTGAACCAGGCCCTGGGAGGGTGGCTCTGACCAA  
CGTCTCTGCCAGGGGGACTCAGGGGGGGCCCCTGGCCTGCGAGAAGAACGGCGTGGC  
TTACCTCTACGGCATCATCAGCTGGG

>829

AGACGATTGTTCCCTGTGATCTGGGTAATTGCTTTATTTTTAATTGTCTGTTGTTTTTTTT  
CCTCATCAGGTGTAGGGAGTGAAGTCTCACATAGGAGGACCTGTGTGAGCCTCACTAC  
CCAGCGACTGCCAGTTAGCAG

>830

TGATCTTAACTCCTGACCCTGAGGCTTTGAGAACGTGGCTAACTTCATCTGTCTTTTCC  
TTGCGTTACAGTTTTATTACCAAACGTGGCCTAAAAGTCTGTGCTGATCCACAAGCCAC  
GTGGGTGAGAGACGTGGTCAGG

>831

AGATGATTGTTCCCTGTGATCTGGATAATTGCTTTATTTTTAATTGTCTGTTGTTTTTTTTTC  
CTCACCAGGTGTAGGGAGTGAAGTCTCAGATAAGAGGACCTGTGTGAGCCTCACTACC  
CAGCGACTGCCGGTTAGCAG

>832

TGATCTTAACTCCTGACCCTGAGGCTTTGAGAATGTGGCTAACTTCGTCTGTCTTTTCC  
TTGCGTTACAGTTTTATTACCAAACGTGGCCTAAAAGTCTGTGCTGATCCACAAGCCAC  
ATGGGTGAGAGACGTGGTCAGG

>833

TACCAACCTTCTTTTTATCATTTGTCTATTTGGTTGTTTTGCATACTGACAAGATTTTCTT  
TTCTTTTAGTTGGTCGAATTGTCTTAGAATTGTTTGCAGATATCGTACCCAAAACCTGCGG  
AAAATTTTCGTGCACTGTG

>834

GTATCCATTAGTAAGCATTGCTAAAGGCATCCATGTCTCAGTCACTAATAGCCATTTTCC  
TTTTTTGTAGTTATTAAGAAATTTATGATTCAGGGTGGAGACTTCTCAAATCAGAATGGG  
ACAGGTGGAGAAAGTATTTA

>835

TTCAGACTAACACACAATTCAGAAAAGAACACATCTAACCTTGGTTTTCTTTTAATTTT

TATTTCTACAGCATGATCGGGAGGGTTTACTGAGCATGGCAAATGCAGGCCGCAACAC  
AAACGGTTCTCAGTTTTTTTATCA

>836

CATATGATAGAATCTAGCATTAAACCACATTACTTACTAAAATCCAACATATTTGTATTTT  
TTTATACAGGTAGATAAAATTTTATTAATAACAGAAGACTTAAAAAACATTGGAAATACT  
TTTTTCAAATCCCAGAACT

>837

TCTGGACATAGAGAAGAGTAATTCCTGTTTATGTGGTCTTTCATACTGCTTTTATTAATG  
CATTCTGCAGATACGTGGACAGTTCAAAGGCTGTTATTGAGACAGCAGATAGAGCCAA  
GCTGCAACCTATAGCTTTAAGC

>838

GCAATGAATTGAAATCTGGCATATAAGCTTAATACTTTGATATAAAATACTAGCTTTATACT  
TTTTTGTAGGCTCTTGAAGTAGACCCATCAAATACCAAAGCATTGTACCGCAGAGCTCA  
AGGATGGCAAGGATTAAAAG

>839

AATAGTTTGTTAGTCACCATAATTTTTGGATATTTTGAGAAATAACTCACATTGCATATTT  
ATTTTACAGCTATCCAGGCAGAATTGCTGAAAGTCAAACAAAAGATAAAGGCACAGAA  
AGATAAAGAGAAGGCAGTATA

>840

CGCATACCGTGGACCGCACACAGGATCAGGGGAATAGGTTGCTCGCGGCTTCACTCT  
TTGTCTCCACAGCAGCCCTCCGGAGAGCTGTTTGAGATTGAAATAGACACCCTGGAAA  
CCACCTGCCATGTGCTGGACCCCA

>841

TGCCTGGAGGGAGCCTGCCCCGGGGTGCGAAGGGGAAGGGCAGCCATCCTCACGTGGG  
TTTCTTTCTCCAGGCTGTCTGAAGGAGACTGTGATTTCAGCTGTTGAAACTAGATGGCA  
AGTTTTCCGTGGTATACGCAAAAT

>842

TAACGCAGCAGAGCTGGGGCCATGCCAGGGAGAATGGCTGCCCACATCCTGGTTTCCT  
CTCTCCGAGCAGACTCAGCCGAGGACGTGCGCAAGGTGTGCCAAGACTGCCCCCTGC  
TGGCCCCGCTGAACGACACCAGGGT

>843

CGCTCTCCTTCTCTGCCCTTTTCATTGTAAGTCATCTTTCCTCAAGAGCATTTTCATGTA  
CTCTTCTCAGCCCCCTCCCACCTTCTACCTATGTGGAGTTTACAGTGTGTGGCACTGACT  
GTGTTGCTAAAGAGGCCACAG

>844

CGCGTCAATGAAATTGGGGGGGATCCATTTTTGAAATTAGTTAAAATAAATCCTCTTTCT  
CTGTGGGCAGCAATATGGCTTTTGTAAGGCAACACTCAGTGAGAAGCTTGGTGGGGCA  
GAGGTTGCAGTGACCTGCACGG

>845

CCTGGGCCTGTGGGTTGTCTTGCCTGGGAGGAGGAAGCAAATACTGAAGGAAATG  
GTCCTTTTTCCAGCCCGTGACCTCACAGCCCCAACCAGAAGGTGCCAATGAAGCAGTC  
CCCACCCCCGTGGTGGACCCAGATG

>846

GAAGGCTGGAGTGCTGTGGCAGGGATGACGTCTCACTTCTGTTATGTCTCTGTGCCCT

GTGCTCTCCCAGGATGAGGGGCATGAAGCTGCTGGGGGCGCTGCTGGCACTGGCGGC  
CCTACTGCAGGGGGCCGTGTCCCTG

>847

CCCTTTGTGGCGCTGTAGGGTCCCTGGGTGGCACCAGCCCTGCTCAGTACCACTGTGG  
CCCTGCCCCCAGATCCTGAGCCGCTATGACATCGCCCTGGTCCAGGAGGTCAGAGACA  
GCCACCTGACTGCCGTGGGGAAGC

>848

CCTCGCTATCGGCAGCCAGAGGGGTCCCCTATGGCCCCCGCCACTGGGACCTTTTGT  
TTTCAATCCAGGGATGCACCAGACACCTATCACTACGTGGTGAGTGAGCCACTGGGAC  
GGAACAGCTATAAGGAGCGCTAC

>849

TGCCTCCTGGGAAGCAGGAGTGGGGAGCTTCCAGCCTGGGGTCACCTCCTCCTGCCC  
GGCCTTCCCGCAGGCCTGACCAGGTGTCTGCGGTGGACAGCTACTACTACGATGATGG  
CTGCGAGCCCTGCGGGAACGACACC

>850

GTTCCAGCTGACATGGTGACTGAACCTGCCCCCAGGGAGTGTGCCTCACACGACGTG  
GCTGTCTCCACAGAGGTCAGGGAGTTTGCCATTGTTCCCTGCATGCGGCCCCGGGGG  
ACGCAGTAGCCGAGATCGACGCTCT

>851

GCCCTCCCAGGGGCAGTGGGCACCAGCGGCCTCCGCATGTCCCAGGGCCACAGGCAG  
CGTTTCCTGGTAGGACGTCATGTTGATGGGCGACTTCAATGCGGGCTGCAGCTATGTGA  
GACCCTCCCAGTGGTCATCCATCC

>852

GTTCTGCGGGTGCTGAGCCAGGCCCATGTGTGAAAGGGGAACCTACTTTCTCTTCCC  
AACACCCATCAGGATCGTGTTGCAGGGATGCTGCTCCAAGGCGCCGTTGTTCCCGAC  
TCGGCTCTTCCCTTTAACTTCCAG

>853

CAGCCACATGAGGATGGGACACAGGAGCTCAGGTAGGCTCAGCCCAGACCCTGTGCC  
CACTTGCCTGCAGGCCCAAGCCATCAGTGACCACTATCCAGTGGAGGTGATGCTGAAG  
TGAGCAGCCCCCTCCCCACACCACT

>854

CTCTGCCTTGTTGAGAGCCCTTCTGCAGGCTTCCGCCTTCCCTTCCCAACTCCTGGATT  
CCCGGATACAGATGAGAAAGGGCAACACCATGCAGCAGTTCCTGCAGAAGGCGCTCG  
AGATCCTTCGGAAAGACTTCAGTG

>855

ATAGCACCTTGCCGCCGATGTTGTCACTGGGGCAGCAGCGGGACATTGGGCTGTCACT  
TCTCCCCTGCAGGACCACTCTTCAACTTTGATGTTTCATGACGATGTGCGGTTGCTCAGT  
GACGCCACTGTGGAGAAGGATGA

>856

CTGGGCTATGGAGGAGAAGCCAAGGGAAGGGGAGGTCAGCAGGCGGCCCTGTGCCCT  
CTTCCTCCCTTAGTCCCATGCAGGCAAGGTGGTGCTGAGGAGCTGGTACGAGAAGAAC  
AAGCACATCTTTCCCGCCAGCCGCT

>857

GGGACGGCAGCCAGCCCCTGCTCACCCCTCGCCTTCCTTGTCTCCTCTGCCACCTTGT

CCTCACACTAGATCCGCTGAGCATCCAGGAGCTGCGCGGCCCCGGCTCCTCAGCTCCC  
TCAGTGTGCCCCGTGGTGTACC

>858

AAGAGAGGGGAGAGTGGAGGTTGAGGGGTGGGGGAGAACTGCCTCTAGACTTCCCT  
TGTTTCCTTGAAGGTAAACATTAGGCTGGGAAGATGACAAAACCTGAAGAGCATCTGG  
AGGGAATTGTCAATATCTTCCACCA

>859

ATAAGAGGCCTAAGAAAGGGTCTTGTGTGGAGGTTCTGAACTCAAGGTCTCTGTTGTC  
CTTTTTTCCTAGAATATCAAAGATAAAGCTGTCATTGATGAAATATTCCAAGGCCTGGAT  
GCTAATCAAGATGAACAGGTCG

>860

GGGGGCGCAGGACCTGAGGAGCCGCGCCGGGAGGAGGGTCGGGCGGGTCTCAGCCC  
CTCCTCGCCCCAGGCTCCCACTCCATGAGGTATTTGACACCGCCATGTCCCGGCCCCG  
GCCGCGGGGAGCCCCGCTTCATCTC

>861

AAATCCCCGCGGGTTGGTCGGGGCGGGGCGGGGCTCGGGGGGACGGGGCTGACCGC  
GGGGCCGGGGCCAGGGTCTCACACCCTCCAGAGCATGTACGGCTGCGACGTGGGGCC  
GGACGGGCGCCTCCTCCGCGGGCATAA

>862

TCACATGGGTGGTCCTAGGGTGTGCCATGAGAGATGCAAAGCGCCTGAATTTTCTGAC  
TCTTCCCATCAGACCCCCCAAAGACACACGTGACCCACCACCCCATCTCTGACCATGA  
GGCCACCCTGAGGTGCTGGGCCCT

>863

TATCTCTTCTCAGGGAAAGCAGGAGCCCTTCAGCAGGGTCAGGGCCCCCTCATCTTCCC  
CTCCTTTCCCAGAGCCGTCTTCCAGTCCACCGTCCCCATCGTGGGCATTGTTGCTGGC  
CTGGCTGTCCTAGCAGTTGTGGT

>864

GTGGGCTGTTTAGAGTGTCACTTACCATGACTAACCAGAATTTGTTTCATGACTGTT  
GTTTTCTGTAGCCTGAGACAGCTGTCTTGTGAGGGACTGAGATGCAGGATTTCTTCAC  
GCCTCCCCTTTGTGACTTCAAGA

>865

GAGGGCGCAGGACCCGGGGAGCCGCGCAGGGAGGTGGGTCTGGGCGGGTCTCAGCCC  
CTCCTCGCCCCAGGCTCCCACTCCATGAGGTATTTGACACCGCCGTGTCCCGGCCCCG  
GCCGCGGAGAGCCCCGCTTCATCTC

>866

AAAATCCCCGCGGGTTGGTCGGGGCGGGGCGGGGCTCGGGGGACTGGGCTGACCGCG  
GGGGCGGGGCCAGGGTCTCACACCCTCCAGAGGATGTATGGCTGCGACCTGGGGCCC  
GACGGGCGCCTCCTCCGCGGGTATGA

>867

TCACATGGGCGCTGCTGGAGTGTCCCAAGAGAGATGCAAAGTGTCTGAATTTTCTGAC  
TCTTCCCGTCAGAACCCCCAAAGACACACGTGACCCACCACCCCTCTCTGACCATGA  
GGCCACCCTGAGGTGCTGGGCCCT

>868

TGGAGCCCTTCAGCCGGGTGAGGGCTGAGGCTTGGGGGTCAGGGCCCCCTCACCTTCTC

CTCCTTTCCCAGAGCCATCTTCCCAGCCCACCATCCCCATCATGGGCATCGTTGCTGGC  
CTGGCTGTCCTGGTTGTCCTAGC

>869

GTGGGCCGTTTCAGAGTGTCACTTACCATGACTGACCTGAATTTGTTTCATGACTATT  
GTGTTCTGTAGCCTGAGACAGCTGCCTGTGTGGGACTGAGATGCAGGATTCTTCACA  
CCTCTCCTTTGTGACTTCAAGAG

>870

TGACCCCCTGTGAGTCCTGGGCCAATCCCTGAGGACTGCTAAGCTGCGTCCTATGCCCT  
ATGCCTGGTAGATTCTGAGCAAGCTGGTGAACAGCCTGTACCCTGATGGCTCCAAGCC  
GGTGAAGGTGCCCCGAGAACCCAC

>871

AGAGGGATCAGAAAACGGGTGGAAAACACACAGTTCTACCAAGTCTTTATCCTGCTTC  
CTCCTCTTCTAGGAAAGCGCAGGAGCATAAGAGGGAATTCACAGAGAGCCAGCTGCA  
GGAGGGAAAGCATGTCATTGGCCTT

>872

CCCCTGTAAGGGAAGCTCGAGAGAGAGTCTGCTGTTCAGCCATCTGACTGCTTCTAAA  
TCTGCTTTTCAGGCCTAAAGGGGAGTGGCCCCAGTGGCGGTAGCGGCGGTGGTGCCAA  
TGGTACCTCTTTCAGCTACACATT

>873

GACGGCCTCTGGGCAAGAGCTGAGCCTCTTGAGCCAGCTTCCATCTAATGCTGTCCTTT  
TGCTTTTCAAGGCTCTGTGTGGCTGCACAGTGAACGTCCCCACTCTGGACGGCAGGAC  
GATACCCGTCGTATTCAAAGATG

>874

TTGGCTTCGGTTTTAGCATTCTGCTGTCATCACCTCCATCCCTCCGTCTTGCTCCTGTTT  
CTCTCTGCAGAGTGGCAGCCAGCGGTGCAGATTCTCTTGTACTCCTTGATATTCTGCT  
CAGCGTGCTGGGAAACACGCT

>875

TTCAAGCTAATGTGCAAATAAACTTTGGATTTTCAGAGTCAACATAACCGGCTTCTTTGT  
TCCTTTCCCAGGCACCTCTGTGAGTGTATCTACCTTTAATCTGGTAGCCATATCTCTAGA  
GAGATATGGTGCGATTTGCAA

>876

ATTCATTCTTCCCATTTGAGTTTGAAGGTCTAAAGTTGCTGGTTATTGGATTTCTTTTG  
ATTTCAATTAGGCACACATTCTGTACTCATCCTCTTTCTTATTCCTGGAATTGTGATGAT  
GGTGGCATATGGATTAATC

>877

GTGGGGGCTCCATGCCTTCTACCGGGCATGACCCATCCCCAGCAATGAGTGATGTCTCT  
TGCCACCCAGAAAGGAAACCTAGCACCACCAGCAGCGGCAAATATGAGGACAGCGA  
TGGGTGTTACCTGCAAAAGACCAG

>878

CCCTGTTCTTCCTCCAAGCCTCTGCCTTGGAGCTATGGATACTATAACTAACTGAAGCTT  
CTTCTTTTCAGGTACCCACTGATGGTAATGCTGGCCTGCTGGCTGAACCCAGATTGCCA  
TGTCTGTGGCAGACTGAACA

>879

CTTGTTAGATGCTTGTAATGCCAGCCCCTGCCTCAAGTAACAATTGATTCTTTTTGTGT



GCTCTCCCAGGTCTACCCTGAACTGCAGATCACCAATGTGGTAGAAGCCAACCAACCA  
GTGACCATCCAGAACTGGTGCA

>880

TTGATGTCTTCTGCGGTAAGAACACTGTGATACAGATGGAATGACGGGAAGTGGTTTT  
CCTTTCTTTCAGTTGGTGAGTTTGTAAAGTGATGCCCTTCTCGTTCCTGACAAGTGCAAA  
TTCTTACACCAGGAGAGGATGGA

>881

TTATGTGGAGTTTTCTTACAATGAAACACATCTACTCTACCACTCACTGTTTTCTCCTTA  
CACTTTGTAGACATGCAGTGAGAAGAGTACCAACTTGCATGACTACGGCATGTTGCTG  
CCCTGCGGAATTGACAAGTTCC

>882

ACGACTTTTCTTTTCCCTGAAATGTGTTTAATTGACTTTTTCTGTTATTTGTGTTTG  
CCTTCACAGTGAAGACAAAGTAGTAGAAGTAGCAGAGGAGGAAGAAGTGGCTGAGGT  
GGAAGAAGAAGAAGCCGATGAT

>883

CGTGTATACATGAACAGAGAGACAGTGCCTTTTCATGCTAAATGTGGTTCCCCACATCT  
CCTCTGATTAGAGGTGTGCTCTGAACAAGCCGAGACGGGGCCGTGCCGAGCAATGATC  
TCCCGCTGGTACTTTGATGTGAC

>884

ATTAAACGAGTGGATTATTCTGTTGTTGTTGGCTTTTTTTTCTCAAACCTCCTTCTCTTCT  
ACTTTATAGTTTCTACAACAGCAGCCAGTACCCCTGATGCCGTTGACAAGTATCTCGAG  
ACACCTGGGGATGAGAATGA

>885

CCATCCTATTAAGTCTGTATTCAAAGGATGAACTGATGATTTTAAATTCAAATGTTTCCTT  
AATTTATAGGTCATGAGAGAATGGGAAGAGGCAGAACGTCAAGCAAAGAAGTGCCTA  
AAGCTGATAAGAAGGCAGTTA

>886

TAGAAGACTTGAAATTGCTGCTTCATCCTACTTATTCAGTCCCCATGGACATATGTGTTT  
ATGATGGCAGCATTTCAGGAGAAAGTGGAATCTTTGGAACAGGAAGCAGCCAACGA  
GAGACAGCAGCTGGTGGAGACAC

>887

ACCCATCGCCAATGGAAGAAGCAGTGTTTTGCACAACTTGAAAAAGAGTTTTTCATT  
TTCTTCCCACAGCCTCGTCACGTGTTCAATATGCTAAAGAAGTATGTCCGCGCAGAACA  
GAAGGACAGACAGCACACCCTAA

>888

AAAAAGAAAGAAAAAGAACCATTCCCTACCCCCAGACATTGTTGACCTGGAGTTGTCAT  
CCTTTGATGCAGGTTATGACACACCTCCGTGTGATTTATGAGCGCATGAATCAGTCTCT  
CTCCCTGCTCTACAACGTGCCTG

>889

TGGTGGCTGCTGCTGCTGCTGCTGTTGTGATTGTTGTTACTCACCAAAGAGATGGTTTT  
GTTTGGTTTAGATGAGCTGCTTCAGAAAGAGCAAACTATTCAGATGACGTCTTGCC  
AACATGATTAGTGAACCAAGGAT

>890

CTTACAGTGTTATTATTTATGAGTAAACTAATTGGTTGTCCTGCATACTTTAATTATGAT

GTAATACAGGTTCTGGGTTGACAAATATCAAGACGGAGGAGATCTCTGAAGTGAAGAT  
GGATGCAGAATTCCGACATGA

>891

ATTGCGTTTATAAATTGTAAATTATATTGCATTTAGAAATTAAAATTCTTTTTCTTAATTTG  
TTTTCAAGGTGTTCTTTGCAGAAGATGTGGGTTCAAACAAAGGTGCAATCATTGGACT  
CATGGTGGGCGGTGTTGTCA

>892

ACTGCTTCTCCATGTTACCCCTTAAAGATTGATTTTTATTTTTTACTCAGCTCTCCTCTT  
GTTTTTCAGGTTGACGCCGCTGTCACCCAGAGGAGCGCCACCTGTCCAAGATGCAGC  
AGAACGGCTACGAAAATCCAA

>893

AGGAGAGACCGCTGTTCTGCGGCGCCATTCTGGGTTCTCATCCTAAGGCTGCTTTCTA  
TTCCATAACAGTGGTTGAAGTTGACATCTGACGACGTGAAGGAGCAGATTTACAAACT  
GGCCAAGAAGGGCCTTACTCCTT

>894

GAGCCTTGACATCATCACATTCTCCAGTTTGTGTTTCGTGTTGAAAGTTAAAACGTGAT  
TCCCTTTTCAGGTGTAATCCTGAGAGATTACATGGTGTGACACAAGTACGTTTTGTGA  
CAGGCAATAAAATTTTAAGAAT

>895

CTTATTAATGTTTGATAATGTTAGGTCATTTGGGTGGTTTTCTTGAATTGCACCAAATTT  
TATTTTTAGGATAAGGATGCTAAATTCCGCTGATTCTAATAGAGAGCCGGATTCACCGT  
TTGGCTCGATATTATAAGA

>896

ATTCTGTTAATGAATGTGGAGGGACCAGTATTAATCCTGATTTTCTTTCTTTCCCCTTTTG  
CTTTTCCAGTGAATCATCTACAGCCTCTGCCCTGGTTCGCATAAATTTGTCTGTGTACTCA  
AGCAATAAAATGATTGTTT

>897

CCGCGATGTCTGCAGCAGGGGTTTCCCTTCGCGTCCCGTCTTCCTCAACTACCTGTTTT  
TTCTTGTCCAGACCGGGGCTTTGAGCTCACATTCAAGACCGCTGATGACCCAGCCTG  
TCTCTCATAAAGTATGGGGAATT

>898

CCTCCCTGCCAGTGTGAGAGGAGCAGGGAGAGGAGACCTCTGGGTCACTGTGTCTGG  
TGCCTGCTTTCAGATTTTGGAGGCAACATCAACGTGGAGACCATCAGTGCCTTTATTGA  
CGGTGGAGGCAGTGTGCTGGTAGC

>899

GGAAGCCAAGGACACTTGGCCCAAGGCCCCCTGTAAGGGCTCAGCTAGGTGTCTCTT  
CGGTCTGTGCAGGTGACCCTCTTCGAGAGCTGGGCAGTGAGTGCGGGATTGAGTTTGA  
CGAGGAGAAAACGGCTGTCAATTGA

>900

GTGTGAGGAGGTTCTCCCTGGCTTGGGGAACCTTTTCCTGACCACCCACCTTTCCATCT  
ACTCTTTGCAGCATACGCTCATCGTGGCTGACACTGAGAACCTGCTGAAGGCCCCAAC  
CATCGTTGGGAAATCATCTCTAA

>901

CTCTCGGGGATCCCATGTCCTTGGGCTCAGTTCCTGGGGCCAGTGCTGGGCTGCTCTC

GTCCTGCTGCAGGATGGTGGCCGATCCTGATAACCCTTTGGTGCTGGACATCCTGACGG  
GCTCTTCCACCTCTTACTCCTTC

>902

CTTGTTCTGGGAGGCGTGCAGCTTTTCCCTTACTTGGAAGTGGTGGGTCACAGCTTCGT  
TTTGTTCCAGTATCCACATGCGGTGGGGAAGAACACCCTCCTCATTGCTGGGCTCCAG  
GCCAGGAACAATGCCCCGCGTCA

>903

GTCCTGCCCCATCAGGCAACACTGGAAAGGTGGCTCTGGTGGCCAAGCTGCTCCTGTT  
TCCCTCCTGCAGGTATTCCCAGACAGGCAACTATGAACTAGCTGTGGCCCTCTCCCGCT  
GGGTGTTCAAGGAGGAGGGTGTC

>904

AGCTCTGCCTGCAGGTGGTGGAAAGGCCTCCAGTCATGGCCACCCCTGGCTAACCTGCC  
CTTTTATCTCAGGAGTATAGCATCGTGATCCAGCAGCTCTCAAATGCCAAATGGGTCCC  
CTTTGATGGCGATGACATTCAGC

>905

TGCTCTCGAGGCCCAACCAGGAAAAGCTCTGGGAAACCCCTCCCGGTTATTCTTGTTG  
GTTCTTCCGCAGGTGGCAAATACAGTGTTTCAGTTCAAGTTGCCCGACGTGTATGGTGTA  
TTCCAGTTTAAAGTGGATTACAA

>906

GTTTTTCAGCTAGCATGTGCCCTGCCTGGGTTCTGCAGTGGGCAGGTCCTGCCACCTCTG  
TCCTCCTGCAGGTATCCGTGCGGCCACTCCAGCACACGCAGTATGAGCGCTTCATCCCC  
TCGGCCTACCCCTACTACGCCA

>907

GAAACCATTACCCCTTATATTTAACTGTGAAATATCTGATTTAAAATTATTTACTTCTTTG  
TTTCCACAGCCTGGTGAGAGTCAAAGAGGCCCCAGGGGACCATATCCACCTGGACCAC  
TGGCTCCTCCTCCTCCACCAC

>908

GCCGCCCGGGCGCCCTGGAGGGGTCTCCGCCCGGAGCCTGGCGCTGCCTCGTGACCT  
GCATCATCTTCAGTTCCAGGGTCTCCCTCCACTGCTGTAGTAACCCGGGTCCGGGGCCT  
CGGTGGTGCTCCTGATGCCCCCTCA

>909

AGCGCTGCCGGGTTCTTGAGTCCTGTGGGATGAGTCAGGGTTCTGAATTGGGCTGCA  
CCCCCTGGACAGGATGATCGGCTGAATGTAACAGAGGAACTAACGTCCAACGACAAG  
ACGAGGATTCTCAACGTCCAGTCCA

>910

AGGGTAGCTGCTAAGGCCCAGGAGGTAGGCAGGTGGGTCGGGCCAGCCGAGACGCTG  
ACACTCGCTGCAGCTTTGCAGTTCTCCTGGAGTTCGCTGAGGAGCAGCTGCGAGCCGA  
CCATGTCTTCATTTGCTTCCACAAG

>911

CCCTGCGGGGGTGGGGGGTGCGGGCGGGGGGTTCTGGTCGGCAGGGGTTCTGACGGC  
TTCTCCCCCGCAGCCGCCTTGCTCCGAACCTTCAGCTTTTTGGGCTTTGAGATTGTGAG  
ACCGGGGCATCCCCTTGTCGCCAA

>912

TTGCACAGCCTGATGGTGGCCCGCAGAACCAGGCCTGGAGCTCCCACTGCGATCTTTG

CTTTCCTTTTATAGCGTCAATCCAGAGTTCAGCCCAGAGGCCCTGGACAACTGCTGTCTGG  
TTTTACAACCACACGATCTGTGCA

>913

GTCACCCAAAAAATACTTTTCGTATTCTACACTGATGTGACAGTAATAATGGTTTTTCTT  
CAACTGACAGATGGGCTTTTTTAAACGGGTCCGGCCACCTCAAGAAGAACAAGAAAG  
GGAGCAGCTTCAACCTCGTGAAA

>914

GGCTCTGTGAAGGGTGGGCCACAACACAGCTGTTCCCAGCACAACTCAGTGTTTCCA  
ACCTTCTTTTCAGTATTAGGATATCCAAGCCGCCTAGCCCGAAGCCCATGCCTGTCATCC  
GAGTGGTGGAAACCTGAGCTGCC

>915

CTGTAGTTCCAAGTTAAAATTCTACACTCCTGATATTTATATATTGCTACTTTGTCATTTT  
CTACCATAGGTCGAAGATCAATTTACAAGACCTCCAAGGAGCTTGCACCAAGAAGACA  
GCCTGAATAGCCCGACAGTTC

>916

CACTGATTTTAAAACTGTACAGTGATCAAACCTGGCCGTTTTATCACAAAACAATTTT  
TATATTTTCAGTACGTGATGGTTCAAGACATGCTCTCTCCATCCCCATGGAACGACCTG  
AAGCTATAAACATCATTGAAA

>917

AAGCCTCTGAGGGATTGAGGGGCCCTGGCAGGACCCTGACCTCCGCCCCTGCCCCCG  
CTCCCGCTCCCAGGTTCCCCCAGCAAGCGGGAGCCCGTGGTGGCGGTGGCTGCCCCG  
GCCTCCTCGGAGAGCAGCAGCACCAA

>918

CCCCCTGACACCCTGCCTCCAGCCTGCCCCCTTTCCTCTAAGGCCCTCTGTTCTCTCC  
TCCCTTCTAGAACATCATCCGCAAGGTGAGCGGCCAGAAGTTCGTCTACAAGTTTGT  
GTCCTACCCTGAGGTCGCAGGGT

>919

GGTGGCCACAGGAGAATCCTGTGGTCCCAACAATCCTTACACACCCTCTTTGTGCCTG  
CTCCTCTACCAGGTCATCCTGACCCCGCCCGAGGCCCAAACCTGAAATCGGAAGAGC  
TTAATGTGGAGCCGGGTTTGGGCC

>920

CCCGTTTTGGACAGGGTGAGAGACCCAAGAATGGCCCCCATCTGTGACCTCTCCCTCT  
TTTTGCCCCCAGTTTCCATCCAGTGGCAGCGCCAGGTGCACATCCCTTCTATCAGCGT  
GGATGGCCTCTCGACCCCCGTGG

>921

CTAGGTAGGGGTGGATGTGCCACCCAACACCCAACCACTGACCCATATTCCTCCTTCCC  
TACTTTCCAGGCCCATCCCGTGGCGGTTGCCAGCAAGAAGCGAAAGAAGCCTTCAAG  
GCCAGCCAAGACTCGGAAACGTC

>922

GTGAGCCAGATGGGTGAGGGTTGTGATTGGGGGTGCTCTTGGAGCCCCACACCTGCCT  
TTCCCATCCCAGGTGCTGTGAGAACTGTGGAATCAGCTTCTCAGGGGATGGCACCCAA  
AGGCAGCGGCTCAAAACGTTGTGC

>923

GGTCAGTAGACATGGGAGGACCAATGCTTCTGGAGCAGGCCCGTGATCTCGTCCCTAC

CATTCCTGGCAGCGTGTGGGCTGTGGGGAGTGTGCAGCCTGCCAGGTAACAGAAGAC  
TGTGGGGCCTGCTCCACCTGCCTCC

>924

TCGGCCCCCTGGCCCCCATGGGCTTGGCCCCATGCTTCATGCCTCTGCTCCACCTGCCC  
CCCGCCAACAGAGCCGAGGGTGTGGAGTATGCCGGGGCTGTCAGACCCAAGAGGATT  
GTGGCCATTGCCCCATCTGCCTTC

>925

TAGGGTGTGGGGAGTTTCTGTGTCTGCCTGGTGCCACCAAGCTGAAACCACCTTTCT  
GATCTTTCCCAGGGTAAACATGCCCCGCCGCAAGGGAGGCTGTGACTCCAAGATGGCTG  
CCAGGCGGCGCCCCGAGCCCAGC

>926

ACTGGAATAGGCGTTGAGGATGGCCTCTCCTAGTCCTAGTTGACAGCACCACCCATTCC  
CCCCACCCCAGCAGCCCTACACGAACCGCCGGCAGAACCGCAAGTGCGGGGCCTGTG  
CAGCCTGCCTACGGCGGATGGACT

>927

TGGAGCCGGGCAGGGTGGATGTGATTGGTCAGGACACCAGGTAGCCATAGCACCTAT  
CTTTCCCCATAGAAGCGGCTGCTGCCCAGTGTCTGGTCAGAGTCTGAGGATGGGGCAG  
GATCGCCCGCACCTTACCGTCGTC

>928

CCTTCCCAGCCTCACCCAGCTGCATGCCAGGGAGCTGAGACCAAGTCTGCTGCAATCC  
TCCCTCACGCAGGAGGCCAGTGCTCTGGCCTGAGTTGGGTTGTGGCCTTACCCCAGG  
TGAAGCAAGAGAAGGCGGATACCC

>929

TTGGCTGATAGAGACTTTTCCTCAGGTGAACTCTGCCCTTCTAATGGTTGCCTGTTTCCT  
ACTTCTCCCAGGCAGTAGACCCAGGCCTGCCTTCTGTGAAGCAAGAGCCACCTGACCC  
AGAGGAGGACAAGGAGGAGAACA

>930

GGTTTTGTAATGCTCCATTGCGCACATAGCAAACCTCATTCAACATACAGACCTGCTCC  
CTTTTCCCTAGGTCCAAAGACCTTAAAAAACCTGGAGCTAGAAAGCAGTAGACTGGAG  
GCTTCTACAGACTGTAGGATTCA

>931

GGTGCGGGACAAGGACTTCCTGCCCTGTCCTCACCTCCCTTCTCTCTTTGATGCCCTCC  
TCCCACTGCAGATCCATTACACCGGCTGCTCTATGAATCCTGCCCGCTCCCTGGCTCCA  
GCTGTCTGCTACTGGCAAATTTG

>932

GCCGGGGCCTGAGGGCTCCGCGTGCCGGTGCGGGCGCGGGTGCCAAGCCGCCCTCTC  
CGCTCGCCCCCAGGTCTTCTGGATCGGACCCCTGGTGGGCGCCATCCTGGGCTCCCTC  
CTCTACAACCTACGTGCTGTTTCCGC

>933

CCTACTCCAGGAATCCTTAAGGCAGATATCATTTACCTACACTGAGTTCTTTGTTGCCAC  
CCTGTAAACAGGCACAATGAGTTTGACTTCATCTCAGGAACTCGAATGAGGAAGCTCGC  
CCGGAAGGAGAGAATCCCCCA

>934

GGTGCCCATCTGAGTCCCTGGGGGCAGGGGCGCCCTCGGGCTTTGACGACGCCCCCTC

CCGCTGGGCCAGGTCGTCCATCCGCAACGTGCACAGCATCCACCAGCGGTCGCGGAA  
GCGCCTCAGCCAGGACGCCTATCGC

>935

CAGAGAGCGCTGTGGGCGGGGCCAGTGTGCGGGGCGGGGCGTCTGACTCGGCCCCGC  
TCTCTGCCCCGAGAGGAGGAGCGGCAGACGCAGCGCTCTAAACCGCAGCCGGCGGTG  
CCCCCGCGGCCGAGCGCCGACCTCAT

>936

TTTCCCAATCAGAACAGCAAATTCTAATTCCATTTTGGGTTTTCAATTCTGATGCACTAT  
GTTTGTTTAGCTCTTAGCCCCCACGACGTAAAGCCTTTAAGAAATGGACACCTCCTCG  
GTCACCTTTTAATCTCGTTCA

>937

GAGAACTACTTGAACGTGAAATCAGCCCACCTGGAGTCTTGTAATCATTAGTTACTT  
TACTTCCCAGGCAAAATGGCAATACCTGTGCTTTGGAAGTTTCTGGAGAAGTATCCTT  
CAGCTGAGGTAGCAAGAACCGC

>938

CCATCACCACACATTTTGGGAGGGTGTCTTTAGAAGCTGACCTGATAATGTGGGATGTT  
GTATTCTTCAGATGAATACCTGACAAAGCAGTGGAAGTATCCAATTGAGCTTCATGGGA  
TTGGTAAATATGGCAACGACTC

>939

AATTTTAAAAAATGTATTTCTGACTAAGTTACATTAAGGTCTCTGCCTCTGTATCTTATGT  
TTCTTCCAGGTGCACCCTGAAGACCACAAATTAATAAATATCATGACTGGCTTTGGGA  
AAATCATGAAAAATTAAGTC

>940

GATGGGTGTAGACCAGCGCAGGGGGTAGAAACGATTTTTAGAAACGAAAGCTTTTTAT  
TACCTTTCACAGGTGGGTTCTACCCTGAGCCCTGTTCCATGGCTCCCTTCAGAGGAATC  
CACTCTCTGGAGCAGTTTGTCTC

>941

ATCTTGTTACTGGGGACTCTAATGTTTGGGCAAAATGAAGGAGACGAATGTCTGTTT  
TCTGGTTGCAGGGGTGCCCTGCTGACAGGAACTAGCAGTGTCTTCTACGGGGCCCCC  
CAGGCTGTGGGAAGACCACAGTA

>942

CCTCCCCTGATTCTCCTGCCCTTGTCATGCTTTCCCCTTGCTCACAGACCCATTGGGATC  
CCCTCCCAGGTGCCCTGCTCCAGCCTCTGTGCAGAAAGTAGTGGGGCTGTGGAGACA  
AAACTGCAGGCCATCTTCTCCC

>943

TTGGGACAAGGCAGTCCACAGGAGCTGCCAGCCATGTTCTCACCTCAGTGCCCACTC  
CTCTGTCTGCAGCTGCCCTCCCCTCATGGTTGTGGCCACCACAAGCCGGGCCCAGGAC  
CTGCCTGCTGATGTGCAGACAGCA

>944

CTGGGGGACGGTCCCTGAAGGTTCCCTGCCTACTGTGCCCTGCTCATGTGTCTTTCTTG  
TGGTTCCCTAGGGCTTTGTGGTAGGGGATCTCTATGCCCTTCTGACCCACAGCAGCCG  
GCAGCCTGCACCAGGATCAAGA

>945

GGGTGGTGAGGAAGGGAGAAGGGAATGGGACGCTGATGGTGAGGAGGCTTCCCTGTG

TTCTCTTTGCAGTTTGGCAGGTGGCTTGAAGGAGGATGAGGGGGAGCTGTGTGC  
TGCCGGCTTTCTCTCCTGGCTGAG

>946

CCAAGTCCTTGGAGGTGGGACAGGAGCCCCCTCCAAGAGCATATCCCAACCACGCACTT  
TCCATCTCCTAGATCCCCCTCAGTGTCTGGCATGATGTGGGTGGGCTGCAGGAGGTGA  
AGAAGGAGATCCTGGAGACCATTC

>947

CTGCTCTCACCTAACTTCAACCCCCACAAGCCGAGCTTTGCCCTCCTGTGGGCCCCCTC  
TCTCTCTTCAGTGTGTGCCAGGGCCAGGGCTGCAGCTCCATGCATTATCTTCTTTGATG  
AACTGGACTCTTTGGCCCCAAG

>948

AGGTACCACAGGCAGGGGCAGAGTCTAAGGGGGACACCAAGGACTCTTGCCCTTGCT  
CCCTTCTCTCCAGGGTGGTGTCTCAGCTCCTTGCCGAGCTAGATGGGCTGCACAGCAC  
TCAGGATGTGTTTGTGATTGGAGCC

>949

CTCATTTTGTGCCTCCTTCACCCCTCATGGCTGGGCTCCCTGAAACTTATACCTGCCTAT  
CTCCCTAAAGATTTGACAAGCTGGTGTGTGTGGGGGCAAATGAGGACCGGGCTCCCA  
GCTACGCGTTCTAAGTGCCATC

>950

GAGCTGGTCAGCACTGGCTTTTCGAGGGAGGAGGTGATGCCAACTCTGTTTCTTCCTGT  
ATCCCAACAAGATTCAAGCTAGAGCCATCTGTGAGCCTGGTAAACGTGCTAGATTGCT  
GCCCTCCCCAGCTGACGGGCGCG

>951

GGAAGCCACCTTCGCAGGGCTCTCCCCTGCCTGGGCATAGACCACAGCCTCCCCACCT  
TGTCATCTCCAGGGCTGGAGCCAGGTAGCTCAGCACTGATGCTCACCATGGAGGACTT  
GCTGCAGGCTGCCGCCCGGCTGCA

>952

GTTCTTGAAGGGAGAGAAGTCATTTTCGAGTTACCCTCGTATCCTTTCTTTGTATCTTCGC  
CTTGATCAGGGGCCATGGAACGTATATGGGAGAAGAGAAGCTCATTGCATCTGTTGCT  
GGCTCTGTGGAGAGAGTAAAC

>953

ATTCTGTAGTCTCCTTTTCATTCATCCCGCCAATCTTGCAGTGACCTAGCTTCGTGATATA  
TTTCTTTAGCTAGGTCAGGGGGTTTTGGTCCAGGTTTCCCCCTCCCTGGTGAAACGGCA  
GAAGACCCACTTTCATGATT

>954

AATTTCTGTGGCTGGTCACGTATTTTGGTCCTGTTTGTATTTCCCTTCCCCTCTCTGTGT  
CTCCTTATAGCCTGTCTCTCTTGTGATCGAGAGGTGATATCCCGGCTTCGGAACATGCAT  
CATCTCGCTGGTAACTCAGA

>955

GTTTGGATTGGCTTGGTGGTCTGTTTATGGTTGGTTTCTTTTCTGAACAAATGCCTTTTC  
CCTTTTTTTCAGATCAAAGACATCTTAAAGCCAGAAATAATGGAGGAGATTGTGATGGAA  
ACACGCCAGAGGCTTTTGGAAC

>956

AATAAACTAATTTTTTCTCCCAATTTTCTCTTCCTTTTTCTTTTTTCTGTCCCCCCTTT

CTCTTCCAGAAGCCCTTCAGCGGCCAGTAGCATCTGACTTTGAGCCTCAGGGTCTGAG  
TGAAGCCGCTCGTTGGAAGTC

>957

AAGAATCAATGAAAAAGAACGAAGCTGGTTTCCAAAGCTGATATGTCTGATTTGGTTC  
CTTCTTCTCAGGTGAAAAGCTCCGGGTCTTAGGCTATAATCACAATGGGGAATGGTGT  
GAAGCCCAAACCAAAAATGGCCA

>958

AACTGGCTCACGTGAGCTCTTTGAGCTTGCCTGTCTCTGTGGGCTGAAGGCTGTTCCC  
TGTTTCCTTCAGCTCTACGTCTCCTCCGAGAGCCGCTTCAACACCCTGGCCGAGTTGGT  
TCATCATCATTCAACGGTGGCCG

>959

CTAGTCAAGTACTTACCCACTGAAAAGCACTTCCTGAAATAATTCACCTTCGTTTTTTT  
CCTTCTGCAGGAGGACACCATGGAGGTGGAAGAGTTCTTGAAAGAAGCTGCAGTCAT  
GAAAGAGATCAAACACCCTAACC

>960

TTCTTTAGACAGTTGTTTGTTTCAGTTGGGAGCGGAGCCACGTGTTGAAGTCCTCGTTGT  
CTTGTTGGCAGGGGTCTGCACCCGGGAGCCCCCGTTCTATATCATCACTGAGTTCATGA  
CCTACGGGAACCTCCTGGACTA

>961

CAGCAGTGGTGGATTTGTGAAGTGGAAGGTGGCCAGGAGCTCTCATGGGTGAACATT  
TTCCTTTCTTAGAGATCTTGCTGCCCCGAAACTGCCTGGTAGGGGAGAACCACTTGGTG  
AAGGTAGCTGATTTTGGCCTGAGC

>962

CTGATTTTAAATGTAGTGTAGTGAAATGCTACACATCTTGAACAGCCTTTCTCTTTTCGGT  
TTTCTTTCAGCATTTGGAGTATTGCTTTGGGAAATTGCTACCTATGGCATGTCCCCCTAC  
CCGGGAATTGACCTGTCCCA

>963

TTGAGAACTGCTAGCCCCGTATTGCTAGCCAGATCTCATGGATGATCTGACTTGGGTTT  
CATCTGTCCAGGTTGGCAGTGGAATCCCTCTGACCGGCCCTCCTTTGCTGAAATCCACC  
AAGCCTTTGAAACAATGTTCCA

>964

CCACCACACCAAGCCAACACCAGTACTGATGGCTGCTGGATTTTGTCTTCTGTCCCTGT  
ATGATTCTTAGAAGTGGAAGGAGCTGGGGAAACAAGGCGTCCGTGGGGCTGTGAG  
TACCTTGCTGCAGGCCCCAGAGCT

>965

GTTCAAGCGATTCTCCTCTGTCAGCCTCTAGAGTTGTCTGGAGTTGTCAGCTCTTCCCC  
TTGCGTTTCAGATCCTCTGGACCATGAGCCTGCCGTGTCTCCATTGCTCCCTCGAAAAG  
AGCGAGGTCCCCCGGAGGGCGG

>966

GATGAGATTGTGTTAAGGATGTTTTTGTATGCAGGTTTTGCCATTTTCTTCTTTTTCCTG  
TCCATTTAGGGGAATGACTCTGACTTTGAGACGGTGTACCAGCAGTGTGTCAGGTGCT  
GCAGAGCGTTCTTGGAGAAGG

>967

GGTTGATTAGAGGAAGGTCCAGGAAATTCATCCTCTACCATTCTTCCCACCCTCTGCC



CCACACCTAAGAAATGGAGTGGCCAAAGTCAACATCTTCTTCAAGGAGCTGAACTACA  
AAACCAATTCTGAGTCTCCCTCT

>968

AAGGGGGCTCCTCTGCCAGAGTCCATCCAGAACCCTCTGTCCCATCGTCAATGTACCTC  
TCCTCTCACAGATGGTCACCCTCCTGTCCAACCTGGGCAGCCAGTGGAGCCTGTGGTT  
CGGCTCCTCGGTGTTGTCTGTGG

>969

ATGATTCTCATGTCCTCTGAGGCTTGAGCCCCCTTAGTCCAGCCTTTGATCATTTCACCT  
TGTTCCCTTAGGATGGAGTGATGGTGCTCAGCGCAACCCACCGGTACAAGAAGAAGTAC  
GTCACCACCTTGTTATACAAGC

>970

CGGGGTAGGGTGGGGTGGCTGCAGGTCTGGGAGGCAGGACAGAGGCGTGACCACCT  
CCTTCCCCACCAGTATCTTCCTGACCGCTGCCCTGGGGCTGCCTGAGGCCCTGATCCCG  
GTGCAGCTGCTATGGGTGAACTTG

>971

TGAGGCCCTCAACCCTCGATGCCCCCTATCTCCCCAGCCCTGACCCCCGACTCCCCTCT  
CTCCACCACAGGCTATGTGGGTGCAGCCACCGTGGGAGCAGCTGCCTGGTGGTTCTCG  
TACGCTGAGGATGGGCCTCATGT

>972

ATGCAGGAGGGTACCAGGAGGGTGGCATGGAGGTGGCCCTGGACCTCAGTCTCCCGT  
ACCTTCCCTGCAGACTCACTTCATGCAGTGCACCGAGGACAACACCCACTTTGAGGGC  
ATAGACTGTGAGGTCTTCGAGGCCC

>973

CCACATCTCCACTGTGCCGCCCACCTCCTTCTCCTCACTGTTCTTCTCCCTCCCCTTC  
CCCTCTGCAGCCTGTCCGAGAACCAGTCCCTGCTGCGGATGCCACCCTGGGTGAACAT  
CTGGCTGCTGGGCTCCATCTGC

>974

GGGCTGGGCAGTGCTGGTCTCTGGCTCCCTCCCCACCCCTCCTGAGAGGGCGCTTGT  
CCCCTGCCCCAGATGATCTTCAAGCTCCGGGCCCTGGACCTCACCCAGTGGCTCATGG  
TCCTCAAGATCTCACTGCCAGTCA

>975

CATTCATATACAGTGTTTTTGAATACAGTATTTTGATCTGCCTTTAACAAATGTTTTCTCA  
TTATTTTCAGTTGCCAAAGCTGTTTGATGGATGCTACTTCTATTTGTGGGGAACCTTCAAA  
CACCATCCAAAGGACAACC

>976

AGAAAACCTGGGGGAGGCAGGACTAGAGAGCAGGGCTGGACACAGGTCCCTCACAG  
TCACTGTTCCCCAGACACCGCTCCACCTGGCTGTGATCACACATTACCGTCTGTGGTC  
CGGCTCCTGGTGACAGCTGGTGCCA

>977

AGCGGACCTGGAGTCCATCAGCGGCCGCAAAGCCCGGGCCTAGGTTTCACCGAGCCC  
TCCTCTCCCTCAGGGCTCACCGCCCTGCACGTGGCAGTGAACACCGAGTGCCAAGAA  
ACCGTGCAGCTCTTGCTAGAGCGCGG

>978

GGACGGGATGCGGGTCGCCGGCTGCTGGAGCAGAGCTTGGAGAACTAAGACCTTCC

CTCCCCGCCG CAGGACATTAAGAGCGGCCGCTCCCCGCTCATCCACGCCGTGGAAAAC  
AACAGCCTTAGCATGGTGCAGCTGC

>979

GCCTCCAGCCTCTGTTCCCTTACCCCGGGTGGCCCGCGCGCCCTCCTGACCCGGCCCT  
CCCGTCCCCGCAGCACGGCGCCAACGTGAACGCGCAAATGTACTCCGGCAGCTCCGCC  
CTGCACTCAGCGTCCGGCCGCGGGC

>980

GAGCTAGGAGGGTTCGGGAGAGAGGACTGTGAGGCATGGGTGGCTCTATGGTCACGCC  
CATCTTCTACAGGTCATCGACATCCTGAGGGGGAAGGCCACCCGGCCTGCTTCCACC  
TCCCAGCCAGACCCCTCCCCTGACC

>981

TAGGCCCCAGCCCCTGCTCTCTGGGTCTAGCCTCTCACCTCCCACCCCTCTGTCTCTCT  
TCCCTTCCTCAGGTCTTCTCTCCGCATCACCATCCTCCTCACCTCCCAGTCTCCCCCA  
GGGACCCCTGGATTCCCCAT

>982

GACAGGTTGGTTTGGCTCATAGGCTGTAGTCTGCCACTTCCTGTTTTATTCTACCTTCTG  
TTCATTT CAGGTCACTGTGCATGGCATCATCCTGGCCCCCTCTAGAGCTCCAATCCTCC  
AACCAGAGCCAGCTCTTCCCT

>983

TTGGCCACTTGGTCTCAAACCTCTCCTCCTTTTTGCTCTTCTCTACTCCACCCCCATCCC  
GGTGATGCAGGAGGAATATCAGGAGTATGAGCCAGAGGCGTAGGGGGCCAGGAGAGC  
CCCCACCAGCAGCACAATTCTGT

>984

AGAATGAATGAATGCAGCGGTTCTTCCTGCCATCTGATAACAGACTATTCTTTGATGTTT  
TCATTTTCAGGATGTACAGATTATAGTGTTTCCAGAAGATGGCATT CATGGATTCAACTT  
TACAAGAACATCCATTTATC

>985

CGCCTCAGCCTCCCACAGTGCTGGGATTACAGGCAAAAACCTCATTTATTTACACCTTT  
TTTTCTCTAGGTGCTCCAGCGCCTGAGTTGTATGGCCATCAGGGGAGATATGTTCTTG  
GTGGCCAATCTTGGGACAAAGG

>986

GAGTTGGGAGAGAAGAGAAGAGTGCTTGGTATCTTGACAAACCTCCTACCTTTTCTC  
CTAACTACATAGATCTTGAAAAAGCCACTACCGCCTGAGCCAGCAGCAGCACCAGTCT  
CCACAAGTGAGCTGAAAAAGGTTG

>987

GTTTGGGCAGGTGGGATGCAGGTGTGAGCACCACTTCCTCCTACAGACAGCTTCTTTT  
TCGTTGTTTCAGGGGAAAGAAGGAGGTTTCATTGTCAGAGACTCCAGCAAAGCTGGC  
AAATATACAGTGTCTGTGTTTGCTA

>988

ATCTCACTTCACTTCCTGGGTCTGTGACCTTTGTGCCCAAGTTACTGACTAAGCATC  
CACTTCTTCAGGGACCCTCAAGGGGTGATACGTCATTATGTTGTGTGTTCCACACCTCA  
GAGCCAGTATTACCTGGCTGAG

>989

TAAGTGAGGATGTGTGAGGCATCCCACCTCCTACACCACACCAACAGCATGACCTCTC

TCTCTGTTTCAGGACTCATATCCAGGCTCAAATATCCAGTGTCTCAACAAAACAAGAAT  
GCACCTTCCACTGCAGGCCTGGG

>990

GGATTTTTTCGTCTATTGTAAGAATTATACATTCATGACCCCAAAGAATCACACCAAGACT  
TTATTGTTAGGATCATGGGAAATTGATCCAAAGGACCTGACCTTCTTGAAGGAGCTGGG  
GACTGGACAATTTGGGGTAGT

>991

CCTCCCCAGCCCCTTTATTGCTATTATGCAGAGCCAAAAGGAGAAGACTAGTTCCTTGC  
CTTTCCTGTAGGAATCTTTCCCATGAGAAGCTGGTGCAGTTGTATGGCGTCTGCACCAA  
GCAGCGCCCCATCTTCATCATC

>992

CGTGCCAAGAAAACGTAAGCAAATATCAAGCCTCCAAATCCTAATGCAACAAGTCCTG  
AATCCCTTGCAGGTATGTCTGGATGATGAATACACAAGCTCAGTAGGCTCCAAATTC  
CAGTCCGGTGGTCCCCACCGGAA

>993

CTAGGAAGACTAGGACCCCTGCTATCCAAAAAGACTGCAAACCAATTTAATAATTTTTT  
TCACCTTCTAGGGGTTTTGATGTGGGAAATTTACTCCCTGGGGAAGATGCCATATGAGA  
GATTTACTAACAGTGAGACTGC

>994

TTACTCATTGCATTTCCCTTGAATTCTGGATTCTAGCCACTCTAACACTTTACTTTTTCTT  
TGGTTTTAGAAAGCAGATGAGCGTCCCACTTTCAAATTTCTTCTGAGCAATATTCTAGA  
TGTCATGGATGAAGAATCCT

>995

TCCACTAAACCTTTGCTGTTTGCTTATATGTTTCCACTAAAGCTTTGATGTTTCCACTAA  
ACCATTTTCAGGTAATGGCACAATTGACTTCCCTGAATTTCTGACAATGATGGCAAGAAA  
AATGAAAGACACAGACAGTGA

>996

TGAGTAAAGTGATTTTTTTTCTTGGTCTTTTGCTATTGACTTACTCTTTTGTGTACTTCTT  
CTTTTTCAGAGTTTGTACAAATGATGACAGCAAAGTGAAGACCTTGACAGAATGTGTT  
AAATTTCTTGTACAAAATTG

>997

CCCGGCAAGTGTGTATTGTGACTGGGTTGGATAAAGACATTGATTCTAACGGGTCAACT  
TTTGTTTTCAGAATTCAGGAAGCCTTCTCCCTATTTGATAAAGATGGCGATGGCACCA  
TCACAACAAAGGAACCTTGGAAC

>998

GAAATGATTACTGCAGAGCAGCGTTAATGGAGTGCTTACTTTACATGAGCTTTTTGTTT  
TTTAATTCGAGGTAATGGCACCATTGACTTCCCCGAATTTTGACTATGATGGCTAGAAA  
AATGAAAGATACAGATAGTGA

>999

GCATAGCTAAGTCAAAGACCTACTTCCCCACACTACATCATTAGCAATAACAATTGCTG  
AATGTTTACAGGATGGCAATGGTTATATCAGTGCAGCAGAACTACGTCACGTCATGACA  
AACTTAGGAGAAAACTAACAG

>1000

TAAAGATGTTGTGTTTATTAAAGCTGTTTTCAAAGATAACCAAAAAGTTACTATTATATTT

GTCTTTTCAGAATTCGTACAGATGATGACTGCAAAATGAAGACCTACTTTCAACTCCTT  
TTTCCCCCTCTAGAAGAATC

>1001

TATTTAGAAGGAGTTAAAATGTCTTTTGTAAGTTTCTTACACAGCTTTCTTTTTTTCCC  
TTTTTTACAGGCAACTTCGGGCTCGCTGGAGAACAATAAGGGGCACCAAAGCCCTCT  
GAGGTTTTACTTTAAGGTTTCGC

>1002

GACTTCCACCATTTTCTTCAAGCATCATCTGTGTTGTTGGAGACTGACATCGATCTTTGC  
CTCTTTGCAGGTTCTGACCCAGCCAGTCCTGGTGACTGGCCTCTGCCTTCCACCGGAG  
AGACTACTGACCTTCTCACCTC

>1003

AAAGAGCACGTCGGGGTGGCTCTGGGCTCCTGGGCTGGCCCCTGACCCACCTTCCTCT  
GTTCTCTGTCAGTCTGGCAGTCGAGGGGAGCTGGGCCCCAAAGGCACCCAGGGTCCC  
AACGGCACCCAGCGGTGTTTCAGGGTG

>1004

TATGCTTTACGTAACAATACTTCTGATGATCCTCTCTCGAGTAAACGCCTGCACCCTTGT  
TTTCCCAAAGAACAATTGCACAGTTAGCCGCGCACCTAAGGAAGCCTTTGGCACCCG  
GGTCCATTGGTCGGCCCCGGTCC

>1005

ATCAGACACCGCTGTGGTGTGGCTGCAACAGATACTCTAACCATATGTCTGTGTCCACA  
CCTGGTGACAGGAAACCAGGGTGACAGAGGAGACAAAGGCGCGGCAGGAGCAGGGC  
TGGACGGGCCTGAAGGAGACCAGGG

>1006

CAGCTGGATGTCAAGTCCCCCTGCTTTCAGTCCGGGCTGCAGCTGAACTCACCTTTCT  
GCTCTGCCCAAGGACCCCAAGGCGTGCCCGGCACCAGCAAGGACGGCCAGGACGGT  
GCTCCCGGCAGCCTGGGCCTCCCGG

>1007

TGTGCCACCATTTGTTCTAAGGAAAAAGGCATCTTTGGAACATGTGTAAAGTCTAACTTT  
TTCCCCTGCAGTGGTTTGCAGGAAAAATTTAGATAGCACAAACAGTGGCAATTCACGAT  
GAAGAGATCTACTGCAAATCCTG

>1008

TTCTTGCTTGTGTACTTAAAAGGGCCCTGTGGAACTCTTGCCTACTTTTTTTTTCTC  
TTTTTACAAGTGTTTCAGCCTCACAGGCCTACAACAAATCCAAACACTTCTAAATTTGCT  
CAGAAATATGGAGGTGCTGAG

>1009

TTGCCATACATCTAAATTGAACTGTAGGAAACAGGCCTCTCAAACATGCTGACACATTC  
ATCTCTTCCAGCCCTGGCACAAAAACTGTTTCCGATGTGCAAAGTGTGGGAAGAGTCT  
TGAATCAACAACCTCTGACTGAAA

>1010

TGGGTCTTAAGCAGTGCTAGCAAAGCTTAATGGACTTGCACTAACTATCCTTCCTCCCT  
TTCTTTGTAGGATGCTATGCAAAGAACTTTGGGCCCAAGGGATTTGGCTATGGCCAAG  
GAGCAGGGGCTCTTGTTTCATGC

>1011

GACCCCTTCAGTGGCCACAGCTCAAGTGAGCCCCTGACCTGGAGTCTTTTTCTCCTC

ATCAACCACCAGGCCAAGGAGGAGCAGCAGGATGACACAGTCTACATGGGCAAAGTG  
ACCTTCTCATGTGCGGCTGGTTTTG

>1012

CCTGGGCTGGGCTGGGCTGGGCTGGTGGTCACCTGGGCCTCAGTTTACCCTGCCTGCT  
GCTTCCACCCAGAACTTTCAGATCTCCCTTAAGAGCAAACAAGGCCCGATCGATGTTTT  
CCTGTGCCCTGAGGAGACCGTAG

>1013

CAGGCACGACAGCCCCTGCCTTCCTCCCTGCTGGGGCATCCCCGGCCTGTGATGCTCC  
CCGTCTCCCCAGAACCGCTGTTGTCCCGGATGGGCAGCCTGCGGGCTCCCGTGGACGA  
GGACCGCCTGTCCCCGCTGGTGGC

>1014

GTAAACAGAGACCCCAGAGCATCTCCAGCCCCGGGGTGGCAGCCTCCTGATGCACG  
CTTGCCCTTTGCAGCCTGGTCAACGAGCTGGCCTTCACCGCCCACAAGATGATGGCTGA  
CGAGGCCCTGGACAGTGGGCTGGTC

>1015

CTTCATCTGCGGGAGGCTGGAGGAGAGAGCCCTTCCCAGCCCACCCGGTCCCTGATCT  
CTTTCAGTGCAGCCGGGTGTTCCCAGACAAAGAGGTCATGCTGGATGCTGCCTTACCC  
CTGGCGCCCCGAGATTTCCAGCAAG

>1016

TCTCATGCTTTATCCTGATTGGCCCCCTGCTAATCTCTCTCCTCGTTCTCTCTTACCCCT  
CGGTACCAGGCGTCCTGGAACATGAGCATGCTGCAGACCCAAGACCTCGTGAAGTCG  
GTCCAGCCCACGACTGAGAACA

>1017

CGGGTGGGAGGCGGTTGCTTGGGGGACCAAAAGACACAAACCCACACCTCCTATTT  
TCGTGTTCCCCAGGAGACATCAAGCAGGAAGGGGTCGGTGCATTTTCGAGAGGGGCCG  
CCCTACCAGCGCCGGGGTGCCCTGCA

>1018

TTTCTGACCTTACCCCCATTTTTTCTCTGCCAAGGTAGCATCTCTACCCCCAAAAGTGT  
TTGTTCCCAGGTGCGCAGGCTCTGGGGCATCCAGAAGAACCGGCCAGCCATGAATTAC  
GACAAGCTGAGCCGCTCGCTCC

>1019

ACTCCCCACCTTACCCCATACAAAGGCTGGGCGGCTAGCAGGCTGACCAGACCTTCT  
CTCTCCCCATAGGTGGCTGGTGAGCGTTACGTGTACAAGTTTGTGTGTGAGCCCGAGG  
CCCTCTTCTCTTTGGCCTTCCCGG

>1020

TTTGCATATAGACCAGTGAGAAGCTGGAGCTAGCACCACTGGCTTAGGTTCTTCCCTTT  
CCCCCTGACAGTGGGCGGCTTTCTGGCTGGGCTGCCCTTCAGCACCATGCCAAGCAC  
TACAGTTGGAGCACAGCCTTCTG

>1021

CCTAGACCAAAGCTGGGTGGATACGGAAGTGCTTAGGGCCAGCCTGATGAGGCTCCTT  
TCTCCCTTCCAGGATGACCATTGATGCCGGATGCTCACTCCACATGCTCAGATTTCCAA  
TGGATTCTCACTCTTGCCCTCTA

>1022

TTCATGCTATTGGAGACCTCAGGTGGGCTTCCAAGTCTCATAGGACCCTCTTTCTCACA

TTCTTTCCAGTTTCCTATCCTGAGAATGAGATGATCTACAAGTGGGAAAATTTCAAGC  
TTGAAATCAATGAGAAGAACTC

>1023

TGTTACGTCCTGCTAAGGGGGACCGTCGTGTCAGCACTGTAATGCAGTGATGTTTTTT  
GTGTCTTTCAGGTGACTTCATGGTCATGACGATTTTCTTCAATGTGAGCAGGCGGTTTG  
GCTATGTTGCCTTTCAAAACTA

>1024

GTCATGGAGTCTTTTAACCAATGTGCGACATAGGTCAGGAGCTGAGCCCATCACTCTTG  
TGCTCTTGCAAGGATCACCTCTGTTCTGACCATGACCACGTTGGGCACCTTTTCTCGTA  
AGAATTTCCCGCGTGTCTCCTA

>1025

CCGGAGGCAGCACTTAGACTTGGGTATCTTCCCTTGACTTTTCCCCACTTCTTTCCTT  
GTCCATTTTAGCCTCGTATCAATAGCCGTGCCCATGCCCCGTACCCGTGCACGTTCCCGA  
GCCTGTGCCCCGCCAACATCAGG

>1026

TCTCTCCTCCTGCCCCCAGACCCAGGTCTCCCCTTCTTCTACATGACCACCTCTCCTCC  
CCCTTGCTCAGGCCAGCTGTCTCTGAACGAGTTTGTGAAGGTGCCCGTCGGGACAAG  
TGGGTGATGAAGATGCTGCAGAT

>1027

AATATTATAAAATAGTCTCTTGAAGATTTTGTCACTCTGATCTTTTTAAAAATTAACTTTTT  
TTCTTGCACTCGGAAAAACAACCATCATTTTAAATCTGAATCTGAAGAGGAGAAAGC  
ATTGATTTATCAGTTCAGTCC

>1028

AGGGTGTGATGTGAGAGAAGGGATTGGTAATGCCTCTTGCCACTGGCTCGGATCCTCT  
TCCCCACACAGGTACCCATCACGGGTGTTTGTGGGAGATACCTTCTGTTACTTTGCTG  
GCATGACCTTTGCCGTGGTGGGC

>1029

CTTCCTATTAGCCACAGGGAGGAGGGTTCAAATAGTGGCCCAGTCACATGAAGCTATCT  
TCCCCCGCAGACTCAATATCAAGACAGGCAAACCTGGAGATGAGCTATTCCAAGTTCA  
AGACCAAGAGCCTCTCTTTCTTG

>1030

GCATTAAATAGATCCACATTCTAAAGCATAGGTATTAGCTGAGGTTCTCTTACCTCTG  
GTCCCTCCAGGTGGCAGAGAGCCTCCAGCTGGTGACAGTACACCAGAGTGAGACTGA  
AGATGGTGAATTCATGAATGTA

>1031

GGGAATCGAGTTTATACCTCCGTGTCTCCCTTTCTGCGTGATTCTTACTCCAGTCCATTT  
CTCCTTGCAATCCTGGGCAGTGCCATCACCTTCTCCATTCGATATCAGCTCGTTCGACT  
CTTCTATGATGTCTGAGTCC

>1032

GCAGTGGCTCTAGGAGAAAGACCCCATCAGTAGGCTCCCACTGACTGGCGGTCCACTG  
GCTTTCCCGCAGGGAACCTACTCACTGCCAAGAGCGAATTCGTTGTGCCTGACCTGG  
AGCTGCCCAGTTGGCTCACCACCG

>1033

GGCCGTCCCCCTCTCCTCTCCCAGGATCAGGAGGAATCACTGCCTCTCCTCTCCCCCGA

CCCCCTTCCAGCACCCAGCAGCAGGTCTTGGGAGCCATTGAGAGGGCCAAGCAGGTCA  
CCGCTCCCGAGCTGAACTCTATCA

>1034

GGGACCTGGGCGGGTGGGCGGGGACAGGTGGGCCCCAGGCAGCTAATGTTCCCCTC  
CCCCGCCCTGCAGCAGCAGCTCCAAGCCCACCAGCTGTCCCAGCTGCAGGCCCTGGC  
CCTGCCCTTGACCCCACTACCCGTGG

>1035

CCGTGTGGCTTTGCCCCGTCCCCAGGTGAGTGTGCGCGCAGCTTGGGTCTAACTTCCTG  
TGTGTTTTGCAGACAGCTGGATAGAAAACGACAGCCTGTCAGTAGACAAGCACGGGG  
ACGACCAGCCGGACAGCAGCAGCCT

>1036

GGGGGGACTCCGGGGACAGGAAGCCCTGGGGTGGCGGTGGCCGGTTTCTCACGCCCCG  
CTTGTCGCCGCAGGTGAAGATTTGGTTCCAGAACCGGCGGATGAAATGGAAACGCAG  
CAAAAAGGCCAAAGAGCAGGCGGCGC

>1037

GGACCAGACTACTGGCCTCTGAGCATCGGGCCAAGTCCAGCTACTGAACCTGCTCCGC  
TCCTCTCCCCAGGTGTGGTTCCAGAACCGGCGCATGAAGGACAAGCGGCAGCGCCTG  
GCCATGACGTGGCCGCACCCGGCGG

>1038

CGGGCAGAGGCTGCTGTCATAGGCAGAGGCCCCCGCTGATGCCGGCCCTGCTTGCCCC  
TCACACTGCCAGGTCTTCACGTGCTCTGTGTGCCAGGAGACATTCCGCCGAAGGATGG  
AGCTGCGGGTGCACATGGTGTCTC

>1039

AGCCCAAGGGTGGGTGGCAGGGTTTCATGGGTGCAGGCCGCCCTGGAGGTGACTGTG  
GCCTCTTTTTTCAGTGTTCCCTCCTGCTCCCAGCAGTTCATGCAGAAGAAGGACTTGCAG  
AGCCACATGATCAAACCTTCATGGAG

>1040

TCCCAGGCAGCCCTTCCCTGCTCTCACCCCTGGCCCTGGTCCCTCCCTCTGCCTGCCTGG  
TCTGCCTGCAGTGCCCCACCTGTGCCAAGTGCTTCCTGTCTCGGACAGAGCTGCAGCT  
GCATGAAGCTTTCAAGCACCGTG

>1041

CTAGCTGTAGCAGAGCAAGGGGGTCACTTCCCTTGGTGATGGCCTCTGCCCCATGTCC  
CCACCTTAACAGGAATGAGAGGCCACACGTATGTGAGTTCTGCAGCCACGCCTTACC  
CAAAAGGCCAATCTCAACATGCAC

>1042

CCTGCCCCCTCCCCTCGTCTCCCCATCCTGAGGTCAAGGCCACAGGCTGAGCTCTTGCC  
TTGTGCCTGCAGCCAGCCTGGACAAGCACAACCGCACCCACACCGGGGAAAGGCCCT  
TCAGTTGCGAGTTCTGTGAACAGCG

>1043

CCTCCTGCTGGGTTTCCTCGAGGGTCCCGGGGCTCCTGCATGATCCCCACGGTGTCT  
CCCTCTTGAGCCGTGGAGCAACTGCGTGTGCACGTCAGACGGCACAAGGGGGTGAG  
GAAGTTTGAGTGCACCGAGTGTGG

>1044

TAGGCCAGGGCCTGGCCCCCTTCCCCTACCCTAGGATCCCCCAAAGTTCTGAGCTCAC

CCTCCCCGCCAGGCCACCTGCGGAGGCACATGGAGATCCACGACCGGGTAGAGAAC  
TACAACCCGCGGCAGCGCAAGCTCC

>1045

AAGGGTAGAACCTGGGTGGACAAGGGCCCAGCCTGAAGCCCCTGAGCCCCAGCTG  
GGGTACATTGCAGAACGGTTGCCCATCAACCGGCGGGACCTGGACCCCAATGCTGGGC  
GCTTTGTCCGCTACCAGTTCACGCC

>1046

GCCTGTCTGAGCCTGGCTGGCTAGTTGACTTCAAGGACAGACTTAGCCCTGCCTCCT  
TTTCTTGCTCAGGGTGGAGTTCACAGTGGGAGACAAGCCTGTCAACAATTCCGCATG  
ATCGAGAGGCACTACTTCCGCAAC

>1047

CCTGAAGCCCCTGCAGTGGCGGGACTCAAGCTCCTGACCTTTGCCCGGCCTGGCTGGG  
CCTCTCTTGACGTCAGCGAGATGATCCGCCACCCGTATGAGACCCAGTCTGACAGCTT  
CTACTTCGTGGATGACCGGCTGGT

>1048

AGGACACGGGGACTGGAAGTTTGCTGCTGGGCTGACCTAAGGCTTCCCTCCTCTGCCT  
CTGTGACCCCAGGCCTGTGGGGCCTCGTCAACAACGCAGGCCACAATGAAGTAGTTG  
CTGATGCGGAGCTGTCTCCAGTGGC

>1049

CCTGGGGTGGGGGAGGGCTTAGGGAGCCCCCTTGCCAAAGCTGAGCTGCCCCACTCCC  
AATCCATCCGCAGGGGGACATGCCATATCCGTGCTTGGGGGCCTATGGAACCTCCAAA  
GCGGCCGTGGCGCTACTCATGGACA

>1050

GGTTAAACAGTCCTAATTGGCTTTGGCTCCCCCTACGTGATCCCAGTCTGACCTTGCCAC  
TCCTTCCCCAGAGTCAGTGAGAAACGTGGGTGAGTGGGAAAAGCGCAAGCAATTGCT  
GCTGGCCAACCTGCCTCAAGAGCT

>1051

CCACCCTGACTACTGAGGTTCTGTGCACACGTCTCTACCTTCCTGCTCAAGACACTGG  
GTCTTTCCACAGCCTGAAGATGACCATGGACAAGACGGGTCTCCTGCTGCTCAGTGAC  
CCAGACAAAGTGACCATCGGCCTG

>1052

CCTGAACTGAACATTTGATGGTGTGTCTCTCTGGTGCCATCTTAATACCCTTTCTCCTTT  
TTCTGTGCAGAAATTTAAATGTGAGTTTCAATCCTGAAAGTTTCCTGGACTGCCAGATTC  
ATAGGGTGGATGACATTCAAG

>1053

AGTAGTGCCAGAGGCACCCTGACATCACTCTCTGAACTGCTTTCTCTTTCACATTCTTG  
TATTTTCCAGCTGACGGCCCAGAGGGTGGGTGCCAATTCCACCAGCAGCTGCAACTG  
AAAAGCAAGGTTCAGAAATGTCA

>1054

CTCTCTCTCTGTCTTTCTCCACTGAACTCTTGAAATGTAATGGCTTATCGTGTGGC  
TTTACCCTAGGGGAAAAGATTACCTTGAGGTTGTGTTCAACAGAGGAGGAAACAGCA  
GAGCTTCTTAGCAAAGTCCTCAA

>1055

GAAGTCATATGGAACAGAGTCTTCTAAATGATCTTTACCTGAATCCAAACACATTGT



TCCTTTTTCAGATTCAACTTATCAGTATATAAAAGGTTCTGCTGACATTAAATCCAACCA  
GGGAATCTTCCCCTGTGGACT

>1056

GTTTGAAAGTGACATGAGTAATGAAAAACAAATGTGATAATCATCACCAATTGAAATTT  
TTCTTCTACAGGTGGAAAGGACAGTGCTATTGGGGCCTTTCTTACATGGGGACCAACAT  
GCATTCACTACAGCTCACCATC

>1057

CATCCCCATTAGTGTATTTGCTTCTTTGTGAGATTAAATTTGTTTCTCTTTCTCTTTCCCTC  
TTCTCTAGTGTGGATTCTTTAAACGCTCTAGGTACGATGACAGTGTTCCCCGATACCATG  
CTGTAAGGATCCGGAAG

>1058

TTGGCCTTCCCTCTCCTCCAGGCCTCTGGGAAAGCGGCTTCCCTTTCTGAGCCACCCCT  
GCTCTCCCCAGCTCTCTGTCGGATGAGGCCCCAGTCCTGCCCAACACCACCCCGGACC  
TCCTCCTGGCCACCACAGCCAAG

>1059

GGCTCTGGAGCCCAACAGCACAGTGGTGACAGTGGGCATCACTGAATCTGTATCCACT  
TCTGTGGCACAGGACAGGCCAGGCAGTCCCAGTGGCTCTGAGGACAAGGGCAACCCG  
GCGCCGGAGCTCAGGGCCTCCTTTC

>1060

AGGAGAGCAGGGGAGGGGTTGGGGGGTGCTCCTGGGCTTCCCTAGCTCAGCCTGCTC  
CTTGTGCCACAGTCATGTCGGAGGCGGGCAGTGGGACCCTGGAGGACGAGTGGCAG  
GCCATCTCGGAGATTGCCTCTACTTG

>1061

GGGGCTGGGAGTCAGCTGGTGCACTGCCCCCTGCCTTGGTCCTGCTGAGTCTTGACCC  
CCATGTCTTCAGGCCAGAGCCTGGGAACCTCTCAGAGAAGGTCTCTCACTTGGAGTCC  
ATGCTCAGGAAGCTGCAGGAGGAC

>1062

TGGGGGGAGTCACAGGGCTGCCCCAGGAAAGGGGCTGGCGGCTCTGACTCCTGTCTC  
CCCGGCACCCCAGGAGAAGGCGGACAGGGCGGCCCTGGAGGAGGAGGTGCGGAGCC  
TGAGACACAACAACCGGCGGCTGCAGG

>1063

CTAGTCTTATTCCCAAAGAGTCCTGGAAAATGTGAGCACCCCTCCCTCACTCAGCATTTC  
CCTCCCTCCAGGACTCTGATGAACAAGACCCTCAGGAGGTGACATACGCACAGTTGAA  
TCACTGCGTTTTACACAGAGAA

>1064

ACAGTCTTATTCCGAAATAGTCCTGAAAAATGTGAACACCCTCCCTCACTCAGGATTTC  
CCTCTCTCCAGGACTCTGATGAACAAGACCCTCAGGAGGTGACATACGCACAGTTGGA  
TCACTGCATTTTACACAGAGAA

>1065

ACAGGGCAAACAGGGGGCCCCCAGGAGCCCCAGCCTGTACCCCGGTCCTGACACCCC  
TTCTGCCCCCAGGGAACGACTCCATCTTCCATGACATCGACAGCGATACCTCCTTAAC  
CAGCCTCAGCGACTGCTTCCTCGG

>1066

TCACCCTGGGCTCACAGGGCTCAGAGAAGGGTCCTGCTCAGCATCCTCCCCACCCAC

CCATACCTGCAGTGACCAACCCATGTGACCGCAAGAAATGCGAGTGGCTCTGCCTGCT  
GAGCCCCAGTGGGCCTGTCTGCAC

>1067

CCCTGACCTTGTTGCCTGTCCCTCTCCTCCTATTCCCCTGGCTCTGCCCCTTGACGGGC  
CCTTCCTGCAGCTCCCCGGCCTGGAACCTGTAACCTGCAGTGCTTCAACGGTGGCAGC  
TGTTTCCTCAATGCACGGAGGCA

>1068

CCCATTCTCTGCTATAGGGCCAGGTGGTCTCGAGGGCCACAGTCGCGCTCACACATC  
CTCTCCCACCAGGCATGCCACGTGCCGGTGCCCCACGGGCTTCACGGGCCCCAAATG  
CACCCAGCAGGTGTGTGCGGGCTA

>1069

CTCTGTTCAACCTATGGAGAGCCCTCATGAGGGTGGGGCTTGAGGCACTTCTCTCCCTC  
CCCAACCACAGGGCAGTGCTCTGGCTACTGTGAGAACTTTGGCACATGCCAGATGGCT  
GCTGATGGCTCCCGACAATGCCG

>1070

CCCTCCCTTCCTCAGCATCCCAGGCACGCCTCTGCCAGCCCCAGCCCCAGCCTCTGATT  
CCTTCCTGCAGCTGCACGGATGGCCGGGTGGCCCCCAGCTGTCTGACCTGCGTCGGCC  
ACTGCAGCAATGGCGGCTCCTGT

>1071

GAGCAGGGGGACCGTGTGCCTCCTGCTTCCCTGAGCCTTGGTGACTCAGTGTCCCACC  
TCTTCCCTCCAGATATAGCCTCCATCCTAATCCCTCTGCTGTTGCTGCTGCTGCTGGTTC  
TGGTGGCCGGAGTGGTATTCTG

>1072

GTCATTATTTTGCCATCCTAGCCTTCCCCCCCCAATAATCTCTGTCTCCTTATACTCCTGCC  
TTTCCCCAGGGCTAAGGGCTTCCAGCACCAACGGATGACCAACGGGGCCATGAACGT  
GGAGATTGGAACCCCCACCTAC

>1073

GTGGGGGTGGGGTAACCTGGGCTACAGGCCAGCTCCTGAGCCCTACCTGAACCCTCT  
GTCACCCTGCAGCCCACCAACTTCACCAACCCCGTGTATGCCACACTCTACATGGGGG  
GCCATGGCAGTCGCCACTCCCTGG

>1074

ACCTGTCCCTTGTTCTCACTCATCGAACAGATGGGAATTTAGTCACCTAATATGTTTTGTT  
TCTATTATAGGCCTTCATTCAATCTCAGATTTATGAAAATAATTACTGGATTGGATTATCAT  
ATGATGAAAGGGAAAGTA

>1075

GGGGCCCAAGGAGAGCTGAGGAACAGGACAGAGGGTGCCAGGTCCTAAGAAACAGT  
ACTTATCTCCTCAGGTGGACTTTGAGGGCAGCCTTGCTGAAAATCGCTTCACAGTCCTC  
CCCAACATAGATCCTGAAATTGATG

>1076

GCTGGGGATCTTCATAGCAACCAGGGCAGGAGACTCACTTTTGATAACCACGTGTCTT  
CCACCCTCGTAGAAAAGCGAAGACTGATGGGACTTCCCAGTTTCCTTACTGAGGTTGC  
CCGCAAGGAGCTGGAGAATCTGGA

>1077

TCTAGGGTGGGGAGGTGTCCAGTAAGTCTCCAAGCAGGAGAGTAGAGTATCTCCTCTT

TACTCTCCCCAGATTGGCTTCCTTCTTTCTATTCCCCGCCTGCCTTCCATGGTAGAGGCC  
AGTGACTTTGAGATTAATGGAC

>1078

AGGCCAACTGTGGTCAGTGCGTTACGGGGCTTCCAATACTAACTTTCCCTTGTCCACCTT  
ATACCCAGCAGGTGGCGAAAGCAGTGAACAATGCCACTGCACAGTCGCTGGTCCTTAT  
TGATGAATTTGGAAAGGGAACCA

>1079

ATTCTGACCCTTATTTCCCCTTCTCTTCCCCACTCCCCTTACTCCTCCCACCTTCTTGCT  
TGTTCTAGGTCTCAGACTTGATCCGCAGTGGAAAACCCATCAAGCCTGTCAAGGATT  
TGCTAAAGAAGAACCAAATGG

>1080

GTTAGAAAGATGGGGAAGGAGAGGAGGACCAAGAGATGCAAAGTCCACAGCTTTGA  
ACCCCTGTACCCAGTTTCTCTCAGAGGAGAAGCTGCACTATCGTAGTGCCCGAACCAA  
GGAGCTGGATGCATTGCTGGGGGACC

>1081

TAGGGGCCTCTGCCTCTCCTTCACTTTCCCCTGGAAGTACCTCCAGCTCCCTTCCTCA  
CCCCTCCAGACCAGGAGACGCTGCTGATGTACCAGCTACAGTGCCAGGTGCTGGCA  
CGAGCAGCTGTCTTAACCCGAGT

>1082

GGCTACATCTTCTGGGGGTTTCATCTATCTTGATCCACAAGCCATGCGAGGTGCCTCTCC  
GCCACTGCAGACATCCTCTGATGGAAGTCTGTGCCCGAACCTTTGTGCCCAACTCCA  
CAGAATGTGGTGGGGACAAAGGG

>1083

ATGCCTTGAGCCTCACTTTACCTCAGCCCACGGCACCAGGCCCCAGGCCCTGTCTCC  
TTCCCTATTAGGTAGGCTTGATCACATTCATGGCCCTGGTAGGCAGCTTTGTGCCAGC  
AGAGGAGGCCGAAATTGGGGCAG

>1084

AGGCCAACTGTGGTCAGTGCGTTACGGGGCTTCCAATACTAACTTCCCCTTGTCCACCTT  
ATACCCAGCAGGTGGCGAAAGCAGTGAACAATGCCACTGCACAGTCGCTGGTCCTTAT  
TGATGAATTTGGAAAGGGAACCA

>1085

GGCAGTGCAAGTGCAGAGGGGCATATGGGGTCCCCATGGCTCCGAATGCTAACCTCTG  
CCCTCTTTGCAGGTGGATGGGCTCGCGCTTCTGGCCGCTGTGCTCCGACACTGGCTGG  
CACGTGGACCCACATGCCCCCACA

>1086

AGGATTGGCCAAGGGTTTCAGGACAGGAAGGAGGTGATTGATGATACACTGTCTTTTA  
TTCTCTTTTAAGACCATGGAGACCTGTGAGGATGGCAACGATCTTGTCTTCTTCTATCA  
GGTTTGCGAAGGTGTTGCGAAGG

>1087

GATTTCTGACCCTTATTTCCCCTTCTCTTCCCCACTCCCCTTACTCCTCCCACCTTCTTG  
TTGTCCTAGGTCTCAGATTTGATCCGCAGTGGAAAACCCATCAAGCCTGTCAAGGATT  
GCTAAAGAAGAACCAAATGG

>1088

CCTCTCCCCTCTGCCCAGGGATTTGGTTGTCCATTCTGCCATAAATCTTGCGATTTTCTC

TCTTCTTCAGTTGCCAGACATTAGTGGATAAGTTTATGAAACTGGATTTGGAAGATCCT  
AACCTGGACTTGAACGTTTTTC

>1089

AGGCAAGAGAATCTCTTGAACCTGTGAGCCAGAGGTTGCAGTGAGCCGAGATTCCAC  
CACTGCACTCCAGCCTGGGCAACAGAGCAAACTCTGTCTCAAAAAAAAAAAAAAAAAA  
AAGGCAAAATTAAAGAATTTCAAGTCC

>1090

TAAAGGAGGAATCAGTTTTATTGTTTGTACTGGACTATACACAAATGTAAAAATCATTTTC  
ATCATTTTCAGAACTTGAAGAAGCTGAAAGAAAAAGCCAGCACCAGCTCGAGAATTT  
GGAACGAGAACAGAGATTTTAA

>1091

TGTTAGTTTTTTGAAGGTGCGCTATACTCGATAAATAATGTTCTTCTTCCTTTTTTTTTTTC  
CTTTGGCAGAGGAGATTGAAGTGGATGTTGAAAGCACAGAGTTCTCCCATGGAGAAG  
TGGACAATATAAGTACCACCAG

>1092

GCCCAGGTGCCTCTGCCCCAGGGCTGGGCAGAGGCAGCCTGTGGTGACCGCAGCTGT  
CGCTGCCCCCTCAGCTGACCATGAATGACTTCAGCGTGCATCGCATCATTTGGGCGCGGG  
GGCTTTGGCGAGGTCTATGGGTGCC

>1093

GCCGCTGAGGCTCTGCAACCCCGGGCGCCCCCTGCTAACTGCCCCGCCCCCTCCCCCTCCT  
CTCCCCCTCCTAGGACTGCCCATTCATTGTCTGCATGTCATACGCGTTCCACACGCCAGA  
CAAGCTCAGCTTCATCCTGGACC

>1094

CCAGCTGGCATCTTGCCTGGCTGGGCCCCATCCTGAGCTGCCCAGGCAGCTCACTGGG  
CTTCCTTCACAGCCAGCCAACATCCTTCTGGACGAGCATGGCCACGTGCGGATCTCGG  
ACCTGGGCCTGGCCTGTGACTTCT

>1095

CCTCTCTCCCTGAGCTGGGATGGGGTCAAGGGCTCTTCCTAAGCCCTGCAATGTCCACT  
CCTCTCTAAAGGCCGTGGAGCTGCCCCGACTCCTTCTCCCCCTGAACTACACTCCCTGCTG  
GAGGGGTTGCTGCAGAGGGATG

>1096

TGCGGCAGGGACTGGGGGTGCTCTGCAGCCCCACCCCCGAGCTAATGCCCATGACCCT  
GTTCTGCTGCAGTACCCTCCCCCGCTGATCCCCCACGAGGGGAGGTGAACGCGGCCG  
ACGCCTTCGACATTGGCTCCTTCG

>1097

TGGGCAGCCTGTGGCTGATGGTATTCCGGCATCTCTGTCCACCCATGTGCCCCTGCCCC  
ACCTGGTAAAGTTACTGGACAGTGATCAGGAGCTCTACCGCAACTTCCCCCTCACCAT  
CTCGGAGCGGTGGCAGCAGGAGG

>1098

CCGGGAGCCGGGCTTCCGGGTGGCTGGCCGGCCCGCTCTTCACCTGCACCACCCATCC  
CTGGCCCTGCAGCAGAGCCTGCTGACCATGGAGGAGATCCAGTCGGTGGAGGAGACG  
CAGATCAAGGAGCGCAAGTGCCTGC

>1099

GGAGGCCGAGGGGCCAGGCCAGGCAGGCTGGGGAGAGCCCCAGCTGACAGAGCTGG

GCTTGGCTGTGCAGAGCGACCCTGAGCTGGTGCAGTGGAAGAAGGAGCTGCGCGACG  
CCTACCGCGAGGCCAGCAGCTGGTGC

>1100

GACTGAGGCCTGAGCACTTGCAATGCCAGCATCACACCCTCTTGTCTGTGTGACCCCC  
CACCTCCCACAGGCTGTGCTGCACATGGAGCAGCAGAAGCAGCAGCAGCAGCAGCAG  
CAAGGCCACAAGGCCCCGGCTGCCC

>1101

GGGCCTCTGGGTTCGTTTTGTAGGAGGGGTTCGGATGTCCTGTGCCACCATTCCTCCC  
TCCATTTCCAGACGATGTACCTGTCCCAGCTCCAGCCGGTGACCAGAAGGAGGTGGAC  
ACTTCAGAAAAGAACTTCTCGA

>1102

CACTAACTGACTTTCAGATTCTAAAACCACCATGTGGATTCCACAACTCAGAAACATT  
ACTCCCCACAGGACTTCATCCAGCAAGCAATTTCTATTCCAGTTTTCCATTCTGGATG  
GGGCTGTCTCGGAGGAACCCCA

>1103

AAGTTTCTGAAACAAGGTGGCAGTAAACCTAAGTTTTTTTGTGGTTTGTGGTTTGTGGT  
CCTACCTGCAGATTTAGAGTCCGAGGCGCTGTCTCCCAGACATACCTTCAGGTACCTG  
TGCATATATAACAACGAGGAGCT

>1104

CACGCAAAGAATAAGATGGGTTGATGGGTTGCAAGCATCCTGGCTCACTCTCACCCCTAT  
GCTAAACTCAGGCGACCGTGCTGTGTGACATCATAGTCCTCTACTGCATGAAGAAAAG  
ACTCTACTATCGGGAGAAGAAAT

>1105

GCGCAACTCCCTCCCGCCTGCCACAAGGGGTCCCAGGGGCACCTTGATCTGCTTGTGT  
CCTTCTTTGCAGGGTCTTGCTAGTGAGCTGGACCAGTGAGGCCTACCCACACCTGGG  
CTCTCCACAGCCCCATCAAAGAAC

>1106

CTGGAGGCTGGATTGAGTCTAGGGTCACTGTAACCTACCAAATGCCGACATGCCCCAC  
CCCTCGCCACAGGTGGGTTTCATTGACTACATTGCTCACCCACTGTGGGAGACTTGGG  
CTGACCTGGTCCACCCAGATGCAC

>1107

AAGCCTGTCCCTCAGTCCCCTTTGACCAGTAATCTCTTCTTCCTTGCTTTTCATTCCAAA  
AATGCTTCAGGCCAATACTGGCAAGTTCTAGGGGGCCCAGTGTCTGGGCTGAGCATTG  
GGACAGGCAGGGCAATGCTGGG

>1108

GAGGGTGTGGCTGTGAAAGGAGAAGCTGTGGCTCAGGCCTGGTTCTCACCTTTTCTGG  
CTCCAATCCCAGACCAGGTGCCTTTCTCCGTGAGCGTGTCCCAGTTGCGGGCCTTGGA  
TGGAGGGAACAAGCACTTCCTGAG

>1109

GAAGTGGATAGAGGGGACAGCTGGCAAGCAGCAGACATGAGTGAAGCAGTGCCTGG  
GATTCTTCTCACAGGTCAAGAAGCAGGCCTTGCGCAGGTTCCGCTGATCGTGGGCATC  
TTGCTGGTGTGATGGCTGTGGTCTCT

>1110

CAGCAGTTTAGCATATTTTTGCCATGAGCTCATCTCGTGTCATTACAGCTCTTTCCTCCT

TTCTCTTCAGGAGGAAATCTCTGACATCAAAGAGGAGGGGAACCTAGAAGCTGTCTTG  
AATGCCTTGGATAAAATTGTGG

>1111

TGGAAGCTGAACCTTCTTCCACAAGGGCCTTCCGCCTCCTTCATTCTTGTGCCCCGTG  
TGGCCCTCCAGGCGCCCCAGCGGGATCCCAGAGAAGGATCTGCACAGTGTTATAGCAC  
CCTACTTCCTGCAGCAACGGGAC

>1112

GGGACAGTGGAGGGCAAGGATTTGGGTTTTCTTAGATCCCAGTTTGTCTGTTGTCTCCC  
ATTGATTTCAAGGCTCTACACAGAGAACAGAGGGAGCTGGTTGCTGTGCTGAGGGAGCC  
TGAGTGAGGAGACCGCCAGCCCC

>1113

GCTCAGCCTGGCCTCCTTGGCCTCCTCTCTGAGTGGACTGGGGTCTCACTGTGCCTGTT  
TATTCCTGCAGGTCTTCATGGAACAGATCGGAATATTCCGGAACATTGCCCAGCACTAC  
GGCATGTCGTACCTCCTGGAGA

>1114

CTGCTCTGCGTCCTCCCACCAGGGGGAAGGCTGTTGGTCTCACCTGGGCCCCTGACCC  
CGTTCTCTCCAGGACCAGGAGAAGGTGCTGGACAAGTATGAGGACGTGGTGCAGGGG  
CTGCAGAAGCGAGGCCAGCAGGTGG

>1115

GAGATGGCAACCGGGCTCCCAGGCCCTCAGGCCCTGCCGGGATCCTGACTGTCCAGCC  
TGCCCCCGCCAGGGCCTGATCTCGCGGGGCTACAGCTACACCCTGCAGAAGAACAAC  
GGGGAGAGCTGGGAGCTCATGGACA

>1116

GTCCGCAGTCCCGCCTCTGTGGGTGCAGGGGGTGGTGGGCTGCCCAGTTCCCAGCTCA  
TTCGTCTCACAGCCTGGGCAGCCAGTACCGGAGCGTGCGGCAGAAGGCAGCTGGGAG  
CAAACGCACGCTGCAGCAGCGGTAT

>1117

TAGGTCCATCCCTGGGCCTCACACCCCTGGCCCGTTGTACACCTGCCTGTGTCCTCCC  
TCCCTCCACAGATGCCTCTGACCTACAGGGGCGGCAGCTGCTGGCTGGCTTGGACAAG  
GTGGCCAGCGACCTGGACCGGCA

>1118

CCCTGGGCACATCCTCAGGGGAAGGGGCTGCCTGGCTGTGTCCAAAACTGAGGGGCC  
CTGGTTCCACAGAACATCACCAACGAGCTACTGCGGATTGAACCTGAGAAGACGCG  
GAGCACGGCTGAGGGCGAAGCCTTCA

>1119

GCAGCATGGAGGTTGGGGTGGGGTCAGGGGGCCAGGTGGGCATCCCCGACGCCTGA  
TTGGTGCTCTCAGGGTTGATGTGGCCAACCGCCTGGAGAAGAGCCTGCAGCAGAGCT  
GGGAGTTGCTGGCCACACACGAGAAC

>1120

CAGGGGGTGTTCATCGCCTGGCTCTGGGAGCTCTGGCCGTAGCACCGCCGTCTCCTCCT  
CTGCCCCGCCAGCCCATGGCCTGTGAGTTACAGGCCCAGAAGTCCCTCCTGGGTGAGG  
TGGAGCAGAACTTGCAGGCGGCCA

>1121

AAAAAAAAAATGAGGGCTCGGTGAGGCATCTGTTTGCTGTGGCTGAGGCCTGAACGC

TTTGCCTTGACAGGGCGCAGAGCCTACAGAGCGCCAAGGCAGCCTACGAGCACTTCC  
ACCGCGGCCATGACCACGTGCTGCAG

>1122

TACTGCATCCATGGTTGCTTTTTTAAATTTTTTTCTGGTTAGTTTTGATTTTTTAAACTCT  
GTCTTACAGAACCTGCTAGATGAGATAGCAAGTAGGGAGCAGGAAGTACAGAAGATCT  
GTGCCAATTTCCAGCAGTACC

>1123

GGTACAGGAACATGTCTGTCTCTTCTCAGCTGTTTTAATCTCCCCTCTGCCATGTCTCTC  
CCTCATGCAGGACTATGAGTTAGAAGCAGAAAACTAAGGTCTCTTCTCGACTTGGAG  
AATGGAAGGAGCAGCCACGTGA

>1124

GTCTAGCTCTCTGTTGCTTACCCTGTTGACACCTGTTTGTTGACCGCTCTCCTAATCCTC  
TTCTCTGCAGGAAGCAGCACTTGCCGCCAAGTTCACTGAAGTTTATGCCATCAACAGA  
CAGAGGCTGCAGAATCTGGAGT

>1125

CAGGTGGGGACAGGCCCTACATGTGCTGCCAGAGCCTGGCTTTAACCTTGTCTTGTCT  
TCTCCATCACAGCAGCCGGAAGTAGAAGTGACCCATGAGACCCTGCAAAGGAATAGG  
CCGGA CTCTGGAGTGGAGGAGGCGT

>1126

GGGGATATAAGACAGTGACTGTTGAGGACCCTAAGTTTAGCTCCCACCTGATCTTCCTC  
TGTCTCTGCAGAAAGCTGCTGATGGGAGCTCCACCCTGGGAGGGGGTGCCGGCACCAT  
GGGATTGAGCGCCCCGCTACGGACC

>1127

AAGGGTAGGAGACGAGGGCCAGGCGGCCAGGCCATCAGAAGCAAGGCGTCCACTGC  
TTTTGCTGTTCTAGGAATTTTTGAACCGAAGAAAAATGACAGAGTTTGGCAACCTGGC  
ACTAATTGATCAGGATGCTGGGCAGG

>1128

AAAAAAAAAAGAAAAAAATGTTGGGAGGAATGAGCTTAAATTTTTAGGAAAGCACTG  
CTTAATTTCCAGGGCGCTGCTGGGCGGCCACCACCACGGAGGGACTCCTCATCTACT  
CCCTGGACACCCGCGTGCTCTTTGA

>1129

CCGGGGTCATCCTCTCTTCCCCTGGTTTGAGTTGGTGGCAGAATAAGCATGATTTTTTC  
TCCTTTTGCAGTTGAAGTGGTCACCTCCTCCCTTCCTGAACTGTATGTGGAGAAAGTGC  
TGGAGTTTTTAGCTTCCTCCTT

>1130

CAATGCAGCATGAAGTGAGCCCACTGTACCACGGGGTGAGCCCCGCACGCTTAGGGA  
GTCTCCCTTTCAGAGCCGGGACGCTGCTGCCTGTCATTCAAGTTCCTCCAGAAGAGCAT  
CCAGCGGCACCTGGACGACCTGTCTG

>1131

AGGTGGTTGGGTGCAGGACAGGCCAGGGCCTGGGCGTTGCTGGCATTGACCATCCCT  
GTGTGATTGACAGCTGTAGCTGGAACCACTATAACATGCAGTACGCACTAGCAGTTTCC  
AAGCAGCGGGGCACAAAACGCTCC

>1132

CTGGTTGGGATGAGGCAGAAGGTGGAGATCCTGCCAGCAGAGTGAACCAGAGCTTCC

CTTTGACCTGCAGAACCCAAGAGAGTGGACGCGGATGGTGATCCGGAACATAGCCAC  
CTCTGGCAAGTTCTCCAGTGACCGCA

>1133

TCCTTAAAATCTGGTTAGATGGATAATTTACATACCTATTTTTTTTTTACTCTTTTCTTCTGT  
TGAAACAGGCTTCACACTGTATAAATAGGAGAGGATGAGAGCCCAGAGGTAACAGAA  
CAGCTTCAGGTTATCGAAATA

>1134

AATGGAGGTTATAGTGTTAGGGTTTGGGATAGGAGTAGGAGACAGGAGTCTCAAACCTC  
TCTTTCCCCCAGGAGTGAGTCCTGGAACCTGAAGGACCTGGATATTACCTCTCCAGAA  
CTCAGGAGTGTTGTGCCATGTGCCA

>1135

CCCCCACCACAGGCACAGACTTAGTGAACCTCCCCCATGCAAGGCCTGACTGTGGTC  
CTCTCTCTGCAGTCCACATCACTCTGGATCCAGACACAGCCAATCCGTGGCTGATACTT  
TCAGAAGATCGGAGACAAGTGAG

>1136

GGTGACCCCGCAGGTGGGCAGGATGCGCCTGGGCCTGGGGCCTCCGACCGCTCCCC  
GCTGTCTCTCTAGTCTCTCTACCTGGGGCCCATCTTGAAGTTTGGCTCCAAGGAGCAG  
AAGCAGGCGTGGGTCACGCCTTTCA

>1137

GGGAGTGAGGCTGGTGCCCTTAGGTTGTGTGGGGTGGGGCGTGCGCTGAGCCCTGGG  
TCTGTGTGGGCAGGGAACGGCAGTGATGCAGGAGCTGCGTCCACCACCGCCCGGGCC  
GAGGGCGACTCATGGGTTCTGAATGG

>1138

TGTTGGGTGTGCTGGTGTGAGGGTGTGGCTGAGGGGCAGCTCTGAGAAAACCAACCCG  
CCTCTCCTTTCAGGGCATCAGTGCCTTCCTGGTCCCCATGCCAACGCCTGGGCTCACGT  
TGGGGAAGAAAGAAGACAAGCTGG

>1139

GTGGGGGTGGCACCTTGAGGCCAGGCCCGCGCCCCGGCTGGCGGGGCACTGACCAGG  
GCGGTCCCCACAGCAAACCTGGACATGGGGCCGCATCGGCATCGCCTCCCAGGCCCTG  
GGCATTGCCCAGACCGCCCTCGATT

>1140

CCTCCTCCCCCTCCCTTCTGTCCCTGGAGGGGCAGCTGCTGACCTGTGGTGTGGGGTG  
GGGCTATTGCAGTTCAAGTTGGCAGACATGGCCCTGGCCCTGGAGAGTGCCCGGCTGC  
TGACCTGGCGCGCTGCCATGCTGA

>1141

CCAGCTGCCCCTTCTCCAGCTTTCCCCACGCCGGGGTCTTCTCCCTCCTGAGCCACTGT  
TCTCATCTCAGGCCATCCAGATCCTGGGCGGCATGGGCTACGTGACAGAGATGCCGGC  
AGAGCGGCACTACCGCGACGCCC

>1142

GGGCATCCTCACTGTCCTTGTAAGTTCCCTTGCTCATCCAGCCACCCATCCTGTCCCTTGCT  
CCAACCCCAAGTTCCCTCCAGTTCCGCATGAAGATCATTAACCTGAAGCTGGAGCGGTTT  
CAAGACCGCGTGGAGTTCTCAG

>1143

ACGGGTAGTGGGGTGATGGGGGAGGCCCTTTCCAGCCCTGGTGCTCAGTGGCTCTG



CTTCCTTTCCAGAGCCCCCTGAGCGGGACTCCACGGTGGCCGTGATTGTGGGTGCCTC  
CGTCGGGGGGCTTCCTGGCTGTGGT

>1144

GTTGGTTTGCTTATTCTTCTGGCTCTGATTTTTTTTCCCCTTTACTCTTTTTGTGTTTTGTTT  
GCATTTTCAGGGTGAACTTCCTACATCCGAGTTTATCCTGAGAGAAGCACCAGCTATGG  
CTACTCACGGTCTCGGTCTG

>1145

ACTGGTGTCCACAGAGGACATGGTTTAACTGGAATTCGTCAAGCCTCTGGTTCTAATTT  
CTCATTTGCAGGAAATGCTGGCATAGAGCAGCACTAAATGACACCACTAAAGAAACGA  
TCAGACAGATCTGGAATGTGAAG

>1146

GCTCAGTTAAGGGTGTCTGTGTCAGCAGAATAACCCTAACCTCACAGAATGGCCCACT  
TCTCTCTTCTAGGCCACATTCGTGGCTGACTGGCGGAACTCGAATCGCTACCCTGCTGT  
TATTCTCTTCTACGTCAATGCGT

>1147

CAGGGTGGGGAGACCAGGTAGAGGGAGTACAGAGTGACCGCCTCAAGTGACACCTCA  
CCTCTCTGCACAGCTCCAATGAGACTCTGTCCTGCGTCATCATCTTTGTCATCGTGTACT  
ACGCCCTGATGGCTGGTGTGGTT

>1148

GACCTGGATGGGGTGAGTTTGAGGGAGGGGGCCAGTAACCCACCTTCTGTCCCACCCC  
TTCTGCTGCAGGTGGATGGGGACTCTGTGAGTGGCATTGTGTTTGTGGGCTACAAGA  
ACTACCGATAACCGTGCGGGCTTCG

>1149

CCCACTACCCATCCTTCCCAGCAGGGCAGCCTCACCCCTGCTAATGTCTGAGGTCCCC  
CTTCTGTTTCAGGAGTCATGACTCTGTTCTCCATCAAGAGCAACCACCCCGGGCTGCTG  
AGTGAGAAGGCTGCCAGCAAGAT

>1150

ACTCTCTCCTCCCCACTGCTGCTGCGGGACTGGGCTTGGTAACGTCCTGTCCTGCCCT  
GTCCTCCACAGGCATTTTTGGCTTCCTGGCCTTTGGCTTTGTGCTCATTACCTTCAGCTG  
CCACTTCTACGACTTCTTCAA

>1151

AGATCCTATCTCAAAAAAAGAGAGAGGAAAAGAAAGGAAAGCCTCACCTGTCTACGT  
TCCCTCACTGTAGATGTCAGGCCAATGTGACCATCGGGCTGCCACCAAGCAGCCCAT  
CCCTGACTGTGAGATCAAGAATCGC

>1152

TGGCCCTTCCCAAGATTTGATGGGAAGTGGCAGCTTCTTCACGCTCCTTCCCTATCCCT  
TCTGCTCTCAGGTTGACTGGGCAGAGTGACGATGAGCCAAAGCGGATCAAGAAGAGC  
AAGATGATTGCCAAGGCCTTCTCT

>1153

ACTATGGGAGGCACTGCCAGGGACCGGGAAGTCACTATTCTTCTCCTTTCCCTTCCTTC  
CATTTCCACAGCGGGCTTGGCCTTTGACCTCAATGAGCCCTCAGCTGATGTCTCCTCTG  
CCTGGGCCCAGCATGTCACCAA

>1154

CTCCCAGGGGAGCGGGGGTGGCATGGACAGAGCCAGGGCCCCAGGCTCGTGTTGTCT

CTCCTCCTGTCAGTGCCCCCAGAGGAACAAGCCAACCTGTGGCTGGTTGAGGCAGAG  
ATCTCCCCAGAGCTGCAGAAGCGCCT

>1155

TGCTTGGTAGTTTGGGGCACCTGGCTCTTTCTCTTGAAGGTTGAATATAATGCTCGTG  
CTCTTTTACAGGTGGCCAGTGGCGATTTCGATGCTTGCGTCCAAGTCTGTGAATGTAAA  
ACCCCTCGTCACCCATAGGTTT

>1156

TTGAGCAGCCATACACCAGTCACCTCCATACTCACTGCCCATGCCCCATCCTCTCCTTC  
ATCCCGGCCAGGCTGATCATTGGCTTCATCAGCAAACAGTACGTTACTAGCCTTCTTCT  
CAATGAGCCCGACGGAACCTTT

>1157

CTTATGGTAGGGGTGGGGAAGGGGAAGAAATCCGGACAGAGGGATCTCAGGGTCTC  
CTTCCTACCATAGGCTCTCCACAGATAGAGAACATCCAGCCATTCTCTGCCAAAGACCT  
GTCCATTGCTCACTGGGGGACCG

>1158

TGCTTATCTGCAGGAAGGAGGGGTGGCATCAACCCTTGGTCAGTCACATGTACCTCCTT  
CCCTCCTCCAGGGACCAACCACTTCCTACCCCAGAGCTCCAGATGCCTACCATGGTG  
CTTCTTATGACCTTGGAATGGCC

>1159

TGTTCAAAAGCAGGGTGTGGTGGTGTCCAGGAGAAGGGCTGGCATCAGGGGGTCTGT  
TTTCTTTCCCCAGGCCCCAGGTGTACCCACCACACTCTCACTCCATCCCCCGTATCAA  
GGCCTCTCCCCAGAAGAATCAGTC

>1160

CCTGACCCATGTGCCTCTTCTTTCTGCGCCTTGCCCGCTCTCCTTATTTCCATTGCTGG  
TTCCTGGCAGGGCCTGCTGCCGTGCCAGCCTCAGGAGCATGCTGTGTCCAGCCCTGAC  
CCCCTGCTCTGCTCAGATGTGA

>1161

GTGGAGGCTGGGTGGCATCTAGGGGAGTGGGCGCCATGCCTACTCCACTGCTTCTCCC  
ATCTCCTTGCAGGATTGGTGAAGACATATTCCCTCCTCTGCTGCCTCCCACTGAACAGG  
ACCTCACTAAGCTTCTCCTGGAG

>1162

TTCGGCCCTTCCGAGGGCAGCTCCTGTGTGCTGAGGGCTCTGCTGCTCTGAGATGCCG  
CGTCCCTTCCAGACCTCACGCCCACCATCTTGGATTGGTTCTCGATCCCGTACCCCAGC  
TACGCCATCTTTGGCTCGAAGAC

>1163

GAAGCACCTGCCCTCCCTGAGTTCAGTGTGTCCAGTGTTCCTCCGGCCAGATGCTCATGC  
CATGCTTCGCAGGGAGCGGGAACGCCGAGAGAAGGAGAGAGAAGAGTGGAACGCC  
AGTACAGCCGGCAGAGCCGCTCACCC

>1164

GCATCCACGGCCCCAGGTGTGTTGATGTGTGTATGCCCCATCCTCACGGCCCCCTCCCTT  
TCTCTTTCCAGGCGCTCAAGGTCCCGATCCCGAAGCCCCATTACCGACATTAGGCAG  
AAGAGTGGGGGGTGGGGAGGACA

>1165

CCTTTGCCATAGTCCCACCCACCTGCCGCCAACACTGTGTGAGGCCTCTCCTGCCCCG

TTCCCATGCAGAAGAAAATCATGATCATCATCTGCTGTGTGATCCTGGGCATCGTCATC  
GCCTCCACTGTTGGGGGCATCT

>1166

GCCTCCAGCTTGCTCTGCGTGGTGGGCAACCTGCGTGATCTGAGGGGATGGGTCTTC  
TTGCTCCTACAGGCTCTCCTTTGATAAAGATGCGATGGTGGCCAGAGCCAGGCGGCTC  
ATCGAGCTCTACAAGGAAGCTGGG

>1167

CGTACCCCGCCCCGCCCTCACCCGTCCCCGCCCTCACCTGCCCCGCCCTCACCTGTC  
CCCGCCCCGCAGGGAGCTCGAGGAGCAGCACGGCATCCACTGCAACATGACGTTACT  
CTTCTCCTTCGCCCAGGCTGTGGCC

>1168

GGCACTGGGAGGGCAGGTGGGGTGGTACCTCTGCCGAAGCCTTCCTGGTCACAGCTT  
GGTCTCTTTCCAGGGTAAAGAGTGTCACTAAAATCTACAATACTACAAGAAGTTTAG  
CTACAAAACCATTTGTCATGGGCGCC

>1169

CCCTGAGCCCAAGGGGCCAAGGTGGGCAGGGACATGGAGCAGGCATGGAAGGCTGG  
TTCTTGTTCCCCAGCCCAAGCCAGTGACCTGGAAAAAATCCACCTGGATGAGAAGTCT  
TTCCGTTGGTTGCACAACGAGGACCA

>1170

GTGCCTTGTGAGGCTTCAAGGTGCAGAAGGTAGGGTGGGGAGACACAGCTCGTGCTC  
TGTTTGTTTCTAGGAACGAATGTTCAATGCAGAGAATGGAAAGTAGCGCATCCCTGAG  
GCTGGACTCCAGATCTGCACCGCCG

>1171

TGGCCACGTGGTCCTGCCTGTCTCAGCACCCACCGGCTCACTCCCATGTGTCTCCCGTC  
TGCTTTCGCAGAGCTCCTCCCTGAATGAGGCCAGCAGTGGCCTCTTCGACGTCTTCCTA  
CGCTTCATGTGCCACCACGCCG

>1172

GGCTCGGTTTGAGTGTACGCATGTCCAGCACATGCCCTGCCCGTCTCTCACCTGTGTCT  
TCCCGCCCCAGGTCCTACGTCCAGTGCCAGGGGATCCCGCAGGGCTCCATCCTCTCCA  
CGCTGCTCTGCAGCCTGTGCTAC

>1173

AGTCCCTCGTAGACAGATACTACGTAAAAAGTGTAAGTTAACCTTGCTGTGTATTTTC  
CCTTATTTTAGGCTGCTCCTGCGTTTGGTGGATGATTCTTGTTGGTGACACCTCACCTC  
ACCCACGCGAAAACCTTCCTC

>1174

ACAAGGGTGTGAGGTACCTCCTGGGTGACGGCCCCGCATCCTGGGGCTGACATTGCC  
CCTCTGCCTTAGGACCCTGGTCCGAGGTGTCCCTGAGTATGGCTGCGTGGTGAACCTG  
CGGAAGACAGTGGTGAACCTTCCT

>1175

AGCAAGCTTTGCAGGAGGGGGCTGGGTGTGGGGCAGGCACCTGTGTCTGACATTCCC  
CCCTGTGTCTCAGCTATGCCCGGACCTCCATCAGAGCCAGTCTCACCTTCAACCGCG  
CTTCAAGGCTGGGAGGAACATGCGT

>1176

CCATGCCACACCCACGAGCACCGTCTGATTAGGAGGCCTTTCCTCTGACGCTGTCCG

CCATCCTCTCAGGTTTCACGCATGTGTGCTGCAGCTCCCATTTTCATCAGCAAGTTTGGA  
AGAACCCACATTTTTCCTGCGC

>1177

AGCTTTCCGGTGTCTCCTGGGAGGGGAGCTGGGCTGGGCCTGTGACTCCTCAGCCTCT  
GTTTTCCCCCAGGGATGTCGCTGGGGGCCAAGGGCGCCGCCGCCCTCTGCCCTCCGA  
GGCCGTGCAGTGGCTGTGCCACCA

>1178

ACGTCTAGGAGGGTTGGAGGATGCCACCTCTGGCCTCTTCTGGAACGGAGTCTGATT  
TTGGCCCCGCAGCCAGACGCAGCTGAGTCGGAAGCTCCCGGGGACGACGCTGACTG  
CCCTGGAGGCCGCAGCCAACCCGGC

>1179

ACATTTTTTTACATTACAATTATGTTGTCAGATTTACAATGTGCAAGTTACCTGGGCTTTT  
CTCTTTTAGAAATCCAAGGGGGAGAGTGATGACTTCCATATGGACTTTGACTCAGCTGT  
GGCTCCTCGGGCAAATCTG

>1180

TTCTGTACAGTCCAGCCCCCTCCTCCCACAGGATCTGCTTTAATCCAGCGCCTCTCCTC  
ATCTCTCCAGCCCAAGGCCACAGTCTCAGATACCTGTGAAGAAGTGGAACCCAGCCT  
CCTTGAAATCCTCCCCAAGTCCT

>1181

TCCTGCCCATTGCCTTTCCACCCCGGCCTCCCCGCCCCCTCCCTGTTCTCTCCTCGTGG  
CCTGTTACCAGCCACAGAGAGTCCAGCCGGCAGCCTGCCTTCCGGGGAGCCAGCG  
CTGCCGAGGGCACCTTTGCTGTGT

>1182

GTGGCCTGTTTCCTGTGTCTGGCTGTGTCTGTCTGTGACCCCAAGCCGGCAT  
TTATGTTGCAGCCAGCAGAGGCCTCGGAGGTGGCGGGTGGGACCCAACCTGCGGCTG  
GAGCCAGGAGCCAGGGGAGACGG

>1183

TTCTCCTCGGTGGCCCTGGCTGTCTTGGACCACCTTCCCTGCTCAGCTGACCCGTACC  
TCTGCCACCAGAGCTCTCTTCCTGCTGTCTGTTGGAGACCTTCCCAGCAACTGTGAA  
TGGCACCGTGGAGGGCGGCTGTG

>1184

CAAGGCCCCGTGCTCTGTGCAGGGCTGGAGGTGGGACGGAAGGTCTGACTTGCGATCC  
GCATCCTCTGCAGGTACAGGCCACCACGACTACACGGCCACTGACACAGACGAGCT  
GCAGCTCAAGGCTGGTGATGTGGTGC

>1185

TTTGTCCCCTGCCACTTTGCTTCTAGACTATCATTATTGGACCTCTGAATTCTTGTCTGC  
CTTCTTGTAGGAGCCCCATGGCACCTGCCCAGCCCCACCTCAGCCCATCTTGACAAAAT  
CTAAGGCTCCATGGAGCCACC

>1186

CAGAAGGATGGGAACATCAGCTGCGCTTCTGTTGGGCATTGAGGACCCCTACATCTGC  
ACATACACACAGGTGACTGTCCGGGATGGCATGAGTGTCTACGACTCTCTAGACAAGG  
CCCTGAAGGTGCGGGGTCTAAATC

>1187

TGTGGGGGTTCCCTGCCTCCCCATGGCCCCCTACCCAACCTCCCACTCATTCCTTTCCAT

GCCCCCTGCAGACGAAAGACGGTCACTGCCTGGGACACAGCCATTGCTCCCCTGGATG  
GCGAGGAGCTCATTGTGAGGTC

>1188

ACGGTGGGGGTGGACCATGGTTGGGGGTGTCCTTGACCAGGTCTCAAACCTCCCTGCT  
CTGTGGCATCAGGTACGGAAGACCTTCTTCAGCCTGGCGTTCTGTGACTTCTGCCTTAA  
GTTTCTGTTCCATGGCTTCCGTT

>1189

GGCCAGCCACGAGGCCCTTACAGACAGCTGACCTGTGTCCCCTTGCTTTATACCCTTC  
ATGCCCTCAAGGTTCTACCACAGTGTCCAGGATTTGTCCGGAGGCTCCAGACAGCATG  
AGGCTCCCTCGAACCGCCCCCTG

>1190

GGGGGTGGGGTGGGGGGCTTTCTCGGTTCTCTGATTCTTGGCAGTGATTTACAGCCT  
TTCCCCTGGCAGCCCCCGCACCCAGCACTGTGACCCGGAGCACTTCCCCTTCCCTGCC  
CCAGCCAATGCCCCCTACAGCGC

>1191

GTCCCCTGTGCCTGCACCCTGACCCCCGCTGCCCCACTTACCTCCACTCACATCCTCTC  
TGCAACTGCAGCTGCCGGTAGTAGAGGAGGTAGTGATGGAACCCCCGGGGGAGCCC  
CAGCCCAGCCAGCGTGTCTCGGG

>1192

CACCAAGGCTGAGTGACGTGGGATGAGGGATGTGGGCAGGCCTCTTAGATGCCACCCA  
TCTCGCCACAGAAGAACCTGGGGTACCGGGACTCAGGCTATTACTGGGAGGTACCAC  
CCAGTGAGGTGCAGCTGCTGAAGA

>1193

TCCTGATGCTCGGTAAGTGACAGTTGCTATTTTTCTCCCCACCTCTGACACTGCCCTC  
CCTGCCTGCAGGAAGACGCGACATGTCAACATCTTGCTGTTTATGGGCTTCATGACCCG  
GCCGGGATTTGCCATCATACA

>1194

GGGATCTGGGACTGTGGACCAGCCATTTGCTGACCTCCGTGGTCCCCCTGCCTGGTCT  
GGCCTGTTGTAGGCAGCTGAGGTGATCCGTATGCAGGACCCGAACCCCTACAGCTTCC  
AGTCAGACGTCTATGCCTACGGGG

>1195

ATACAAAATTCCTTGGGCCTCCCAGCCCCTGACCCCAGATCACCCCTTTCCTGCCCCCG  
TCTGCCCCCAGATTATCTTTATGGTGGGCCGTGGCTATCTGTCCCCGGACCTCAGCAA  
ATCTCCAGCAACTGCCCCAAGG

>1196

CCATGAGGCTGGGGCTGTTGGGATGCCACAGCGGTCTGGACCCCCCTCCTCCCCCCC  
ACCTGCCCTCAGATCCTGGCCACAATTGAGCTGCTGCAACGGTCACTCCCCAAGATTG  
AGCGGAGTGCCTCGGAACCCCTCT

>1197

GTGGCTAAGGACCTGGGTCAGGGAGAGAGCAGGGCAGGACCCCGAATGATCTCCAGC  
ATTCTGTGCCTAGCTGCTGATCGCCTACAAGCCAGCCCCTGGCACCTGCTGCTACATCA  
TGAAGATAGCTCCAGAGAGCATCC

>1198

TTGCCTGATATACCTGAAGTCCCACAATAAGGGCTGCACATGGGATAGAACTCACTTC

CTACATTCCAGATGGAATGCTCTCTGCAGGCCAAGCCCGCAGTGCCTACGTCTAAGCTG  
GGCCAGGCAGAGGGGCGAGATG

>1199

GAGGTGGGCGGGGCAGGAGGCTAGGGAGGGCAAGAGGGGCCAGGGCTCTGAGCATA  
CTACCTCCTTGCAGAGCCGCCCCCAGGCCCTTCCTGGACATGGGGGAGGGCACCAAG  
AACCGAATCATCACAGCCGAGGGGAT

>1200

CTGGGGGTGGCTGGGGGCAGGGACCCCAGGTGTCAGGGTGCTGATGTTTCGCTGCCTC  
ATTTCCATCCCAGGGCCTGAACCTGGACGACTGCTCCATGTATGAGGACATCTCCCGGG  
GCCTCCAGGGCACCTACCAGGATG

>1201

GTCTTTTACTTACATCTTTACTGCACGTTCCAAGCGTTGTGTGGCCTGACGAGTGTGTT  
CTCTCTTCTAGTCGACATTACTCTGAAGGGACGCACAGTTATCGTGAAGGGCCCCAGA  
GGAACCCTGCGGAGGGACTTCAA

>1202

TCGGTAAGTGGTCTGTTGTCTTTTAAGCCTGCATATTTCTGGAAAGAATACATTTTTTGT  
TCTGTTACAGCTCCGGGTTGACAAATGGTGGGGTAACAGAAAGGAACTGGCTACCGTT  
CGGACTATTTGTAGTCATGTAC

>1203

TTAGAAAATTTTAAAACCTATTAAAAATATTCCTCAGCATTGCTAATAGCTTGCTTATTTAT  
TTAACATAGGGCTTCCGTTACAAGATGAGGTCTGTGTATGCTCACTTCCCCATCAACGT  
TGTTATCCAGGAGAATGGGT

>1204

TTAGTGCCTCTGCAATTTAAATATTTTTTACACAGATTTGATGCTGTGCAAATGCCCTCT  
CCCCTTTTAGGTGTTGCTTGTTCAGTATCTCAAGCCCAGAAAGATGAATTAATCCTTGA  
AGGAAATGACATTGAGCTTGT

>1205

CATAATGAAATACTTCCTTTTTTAAGATGGGTTAGGCTGATGTATTAATTGCTTTATCTTCA  
CTCCTATAGCGGCTTTGATTCAGCAAGCCACAACAGTTAAAAACAAGGATATCAGGAA  
ATTTTTGGATGGTATCTATGT

>1206

AAAAAAGATTAGTACTTTCCTGGGCAAGTGTATTGATGGGGATTACAGATTTTTTTTCT  
TTTTTTACAGTTACCTGGCTACAGAAAGAAGATGCCAGATGACACTTAAGACCTACTTG  
TGATATTTAAATGATGCAATA

>1207

TTGGCCTTTGTTAGAACCTCCAGGGTGTGGTTCTCAGCTGTGGCCACTTACACCCTCCC  
TCTCTCCCCAGGCCTGTGGGTCCCCATCGCCCAAGTCCTGCCACACTCCCACCTGCTA  
CCCTGATCAGAGTCATCATGCC

>1208

TAGGCCTTTGTTAGATTCTCCATGGTTCATATCTCATCTGAGTCTGTTCTCACGCTCCCT  
CTCTCCCCAGGCTGTGGGGCCCCATCACCAGATATTTCCACAGTTCGGCCTGCTGAC  
CTAACCAGAGTCATCATGCCT

>1209

CCTCCACCGACCTCACTCCTCCCACCCCCATCCACGCTGAATCGGGTTCTGCTTCCGCT

TTCAACCCAAGAAAGCCGCAGGTGCCGGAATGTGATGCCACTGACTTGCGCATTGGGG  
GTTAGAGAAAAGCGAGCTGCTCT

>1210

CATCAATCCTGCAGAATCGACCTCTGCTGGCCGGCTATACCCTGAGGTGCTCTCTCACT  
TCCTCCTTCAGGTTCTGAGCAGACAGGCCAACC GGAGGACAGGATTCCCTGGAGGCC  
ACAGAGGAGACCAAGGAGAAGAT

>1211

TAAGCCTTTGTTAGAGCCTCTAAGATTTGGTTCTCAGCTGAGGTCTCTCACATGCTCCC  
TCTCTCCGTAGGCCTGTGGGTCCCCATTGCCCAGCTTTTGCCTGCACTCTTGCTGCTG  
CCCTGACCAGAGTCATCATGTC

>1212

TAAGCCTTTGTTAGAGCCTCTAAGATTTGGTTCTCAGCTGAGGTCTCTCACATGCTCCC  
TCTCTCCGTAGGCCTGTGGGTCCCCATTGCCCAGCTTTTGCCTGCACTCTTGCTGCTG  
CCCTGAGCAGAGTCATCATGTC

>1213

CTGTCAGTCCTGCAGAATCAGCCTCTGCTTGCTTGTGTACCCTGAGGTGCCCTCTCACT  
TTTTCTTCAGGTTCTCAGGGGACAGGCTGACCAGGATCACCAGGAAGCTCCAGAGGA  
TCCCCAGGAGGCCCTAGAGGAGC

>1214

TAAGCCTTTGTTAGAGCCTCCAAGGTTCAAGTTTCTAGCTGAGGCTCTCACATGCTCCC  
TCTCTCTCCAGGCCAGTGGGTCTCCATTGCCCAGCTCCTGCCACACTCCTGCCTGTTG  
CGGTGACCAGAGTCGTCATGTC

>1215

CTTTGTTAGAGCCTCCAAGGTTCCATTCACTAGCTGAGGTCTCTCACATGCTCCC  
TCTCTCCCCAGGCCAGTGGGTCTCCATTGCCCAGCTCCTGCCACACTCCCGCCTGTTG  
CCCTGACCAGAGTCATCATGCC

>1216

TAGGCCTTTGTTAGGGCCTCCAGGGCGTGTTTACAAATGAGGCCCTCACAAGCTCC  
TTCTCTCCCCAGATCTGTGGGTCTCCATCGCCCAGCTGCTGCCCCGCACTCCAGCC  
TGCTGCCCTGACCAGAGTCATCA

>1217

TAGACCTTTGTTAGGGCATCCAGGGTGTAAGTACCCAGCTGAGGCCTCTCACACGCTTCC  
TCTCTCCCCAGGCCTGTGGGTCTCAATTGCCCAGCTCCGGCCCCACACTCTCTGCTGCC  
CTGACCTGAGTCATCATGCTTC

>1218

TCAGCCTTTGTTAGAACCTCCAAGGTTTCGGTTCTCAGCTGAAGTCTCTCACACACTCCC  
TCTCTCCCCAGGCCTGTGGGTCTCCATCGCCCAGCTCCTGCCACGCTCCTGACTGCTG  
CCCTGACCAGAGTCATCATGTC

>1219

CTCACATCATTGATGAGAATGCCTTGAATCCGAGCTACTAAATCACATTTCTTCTTCT  
AACCTTCCAGTTAGATCAAACCATTGCTGAAACTGAAGAGGACATGTCAAATATTACA  
GATCCACAGATGTGGGATTTTG

>1220

GGGGCTGTGACTAGGATCGGGGGACGCCCCAAGCTCAGTGCCCCTCCCTGAGCCATGC

CTCCCCAACAGCTATACGGGCAGCTCCCCAAGTTCCAGGACGGAGACCTCACCCCTGT  
ACCAGTCCAATACCATCCTGCGTC

>1221

GGCCCATCCCCAGTGACTGTGTTGATCAGGCGCCCAGTCACGCGGCCTGCTCCCCCTCC  
ACCCAACCCAGGGCTCTATGGGAAGGACCAGCAGGAGGCAGCCCTGGTGGACATGG  
TGAATGACGGCGTGGAGGACCTCCG

>1222

TGGGGCAGACGGGGGTGTCTCAGGGGCTGGGAGGGATGAGAGTAGGATGATACATGG  
TGTGTGCTGGCAGGAGGCGGGCAAGGATGACTATGTGAAGGCACTGCCCCGGGCAACT  
GAAGCCTTTTGAGACCCTGCTGTCCC

>1223

AGGCCCTCTGCCCCCAATTCCTCTCCAGCCTGCTCCCGCTGGCTGAGTCCCTAGCCCCC  
CTGCCCTGCAGATCTCCTTCGCTGACTACAACCTGCTGGACTTGCTGCTGATCCATGAG  
GTCCTAGCCCCTGGCTGCCTGG

>1224

CTTCCCCAGCAACACAAATGTCCTGCCAGATTCTCCTGGAAAAAACTTCTGCTCCT  
GTCCCCCTCCAGGTCCAGGTTGCCCATGTCCAGGAAAAGATGGATCCCCCTATCCAAA  
TCTTCTCCGTGGTGTGTGTGGGT

>1225

GAAATGGGATAGATTGGAGGTCCTGTTGACCTCCATGCTTATTCACCTCAGTTCTCTTCT  
TGGCTCTTAGTTGGATCGAAGCCTCTTAAAATGGCAGATGACTTGGACTTCGAGACAG  
GAGATGCAGGGGCCTCAGCCAC

>1226

GTCAATTTGAGCCTTTATTTCTCCGTTTTAGAGTTTGGTTGGGTTTCTCTTTGTGATGC  
ATACATACAGGTCCATCTGGTTGGTATTGACATCTTTACTGGGAAGAAATATGAAGATAT  
CTGCCCGTCAACTCATAATA

>1227

CAGAGCCTTTACTGTCATGTCAGCCTCCCTGGGCCTACTACCTTCAGCCTCCTTCCCTAT  
CTGCCCCCAGCTGATTGGCATCCAGGATGGGTACCTATCACTGCTCCAGGACAGCGGG  
GAGGTACGAGAGGACCTTCGTC

>1228

TGCTCAGCTTTGTTCTGTACGTTTCTTCCTGAGCTCAGACATCTCTTGGCTATCCCTCTT  
GCTTCTCCAGATCACGGTGCTGTCTGCCATGACAGAGGAGGCAGCTGTTGCAATCAAG  
GCCATGGCAAATAACTGGCTC

>1229

TGGCTCTGTCCTCCCTATCCTTCCTGTTGAAGGTATTATCCTGTCTTACTAATTTCTCTCT  
CCTACCTAGGATGGCGGTGGTGGCAGCAGTGATCCTCTGAACCTGCAGAGGCCCCCTC  
CCCCAGCCTGGCCTGGCTCTG

>1230

CTCTACGCGTGGGGAAAGTTTCCTGGCAGCCTGAAGTGTACACCTGACGCCTGCACTCC  
CTCCCTATGCAGGGTGCAAATCCGGCCGCGATGAACGCGAGCGCCGCTCGCTCAACG  
ACTCCCAGGTGGTGGTAGTGGCGG

>1231

GAACAATCATGAAACTATGGATGATTAGTCCAGCAAAAATATCCAATTGGGAACCCTCA



TCCTTCTGCAGAGCCCCAAATGGCGCAGTGGGAAATGCTGCAGAATCTTGACAGCCCCCT  
TTCAGGATCAGCTGCACCAGCTT

>1232

AAGGGGTTGGAAAGCCTCAGGACTACAGTAACACTGCAGAGACACTAATACTTCTTAT  
TCCTGGTCCCAGGCAGGAAGCTGCACTTGGGAGTGATGATTCCAAGGCTACCATGCTA  
TTCTTCCACTTCTTGGATCAGCTG

>1233

AGGGTCTAGGGCAATAGGTCATTGAGAGTGGTTGAATTGGATCAATCCTTTCTGTTTAC  
CTTTCTGTTAGCCCTTTTCCCAGGATCCTACCCAGTTGGCTGAGATGATCTTTAACCTCC  
TTCTGGAAGAAAAAAGAATTT

>1234

TATAATTTCAGGCCTGAACTTAAGGCATGAAAGGCCAGAGTTAAAACGTGCTCAGAGC  
CTCTTTTTTTCAGGAACAAGGAGAGCCAGTTCTCGAAACACCTGTGGAGAGCCAGCAA  
CATGAGATTGAATCCCGGATCCTGG

>1235

TAGGGTTGACAGTGTTACGCCTAACACCTCCCTGAGAAGCAGCCTCATCGGGGTCCTC  
TCCCCTCTGCAGAAGCTGGTAAAATCCATCAGCCAACCTGAAAGACCAGCAGGATGTCT  
TCTGCTTCCGATATAAGATCCAGG

>1236

CTCTGACTGAGACCCAGTCAGGAAGGAGAGGAAAGAACCCCTGGACTGACTCCTGT  
TCCCACCATCCAGGGAAGACACCCTCTCTGGACCCCATCAGACCAAAGAGCAGAAG  
ATTCTGCAGGAAACTCTCAATGAACT

>1237

CTTCATCCCCAGTTGGGTGGTGGAGGGTGAAAGGGAGAGATGCTCAACACTCACATTA  
TCTCTTTCCCAGGAGGTGCTGGATGCCTCCAAAGCACTGCTAGGCCGATTAACCTACCT  
AATCGAGCTACTGCTGCCAAAGT

>1238

AGATCTTGGAACCTGGATGGGGGAATCCAGGAAACTCATGGATTCCTTCTTCCTGAATT  
TTATCACCCAGGTTACACAGCTGGAGCAAAGCTGTTGTTTCACCTGAGGCAGCTGCTGA  
AGGAGCTGAAGGGACTGAGTTGC

>1239

TTTTTTTTTTCTGCTGAGTTTTTACAATAATTCCATTCCTTGTCTCCATGTATCTTCCTCC  
TGGAACAGCTTCCGGAAGTTCAACATTCTGACTTCAAACCAGAAAACCTTTGACCCCCG  
AGAAGGGGCAGAGTCAGGGT

>1240

ACAGAGGACTCGAGGCAGGGGGAGCTTGCCAAAGAGCCTTCTGATGACTATGTCTTTG  
CCTGTCCCAGAGGGGGCCACTAGGTGTGACAGAGGAACTGCACATCATCAGCTTCACGG  
TCAAATATACCTACCAGGGTCTGA

>1241

GAGCAGGGGTGTGGAAGCTTGGTGTGATAGGTTGCTTCTGAGCCAGCCTACACTGCTC  
CCACCCCTGCAGAACCAGCAGTTCTTCTCCAACCCCCCAAGGCCCTGGAGCTTGC  
TGGGCCCTGCTCTCAGTTGGCAGT

>1242

CTTCCCACGTGCCCTCCTTCCCTACACCAGAGGCAACTCCTCAGCTTTTGCTACCTTTC

CATTCTCCAGCGAGAGAGCCCTCCTGGCAAGTTACCATCTGGACATGGCTGGACAA  
AATTCTGGAGTTGGTACATGACC

>1243

GGAGCAGGGAGGCAGGGGCTGGGGGGGCAGGGTGTGGGCGGTGTCACACGTGAC  
ACACTGTGCTCCAGACGCATCATGGGCTTTGTGAGTCGGAGCCAGGAGCGCCGGCTGC  
TGAAGAAGACCATGTCTGGCACCTTT

>1244

CAGAGAGTCAGAGAGCTCCAAGGCCCGGCCTCTTCCCTCAAGCCCGCCTGTTCCCTGCA  
TTCACTCTCCAGACAAGGTGCTCATCTACTCTGTGCAACCGTACACGAAGGAGGTGCT  
GCAGTCACTCCCGCTGACTGAAAT

>1245

TCCCTTGGGCTGCTGGGTTGGGAACCTAACTAAGATCGGGGCCTCACTTTTCTCTCT  
GGATTACCTAGTCTTCAGAACTGTGTAAAGATTGAAGAAATCATGCCGAATGGTGAC  
CCACTGTTGGCTGGCCAGAACAC

>1246

GTATCCCAAGTATAAGGAGGTTCTTGTGAACTGCAATGCCTCTTTTTCCCTTTCTTTTT  
TATATTTCAGAATAGCTGCAATCTCCATGGCCTCTAAGATAACAGACATGCAGCTTGGA  
GGTTCAGTGGAGATCAGCAAG

>1247

AAACATTTAATAGAGAATAAAAGAAAAGAACTTTCAGTGGTTTAATGCTGTTACTTTTA  
ATATTTCAAAGATCTGACTGCAGCCATGAGCAGCAATGAGTGCTTCAAGTGTGGACGA  
TCTGGCCACTGGGCCCCGGAATG

>1248

AAGTACTTCAGTATTTGTTAGTATCAAGACTGGTCTGACTAGCCGAATTCTTTGTTTTTG  
CTCAAAACAGGTTTCCAGTTTGTTCCTCGTCTCTTCCAGATATTTGTTATCGCTGTGGT  
GAGTCTGGTCATCTTGCCAA

>1249

ATAAGTTAAAACGTAACACTTTGTAAAGGTATTATAGTACATGGCCTGTTTCTTTTCCTT  
ATTGTTGAAGCCTGCTATAACTGCGGTAGAGGTGGCCACATTGCCAAGGACTGCAAGG  
AGCCCAAGAGAGAGCGAGAGCA

>1250

ATGGTGACTGTTGCTTTGGTAGACAGTTTTTTCTGAGGCCCATGTGAAAACTTTTAAT  
TTCTTTTTTAGGTGTGGTGAACTGGTCATGTAGCCATCAACTGCAGCAAGACAAGTG  
AAGTCAACTGTTACCGCTGTGGC

>1251

ATGGCGCGGAAAACAGGGGTGGCCTGGCTCGGCCTGGCCCCGGCCGACGCTGTGCGT  
TTGTCGCTTACAGTCTCCCGCTTCATGGGCCCCGGCGAGCGGCATGAACATGAGCGGCA  
TGGGCGGCCTGGGCTCGCTGGGGGA

>1252

CAGAGAAGACTCTTGGGTTTCTGATAGGCACTGACTCTCTCTGCCTATTGGTCTATTTTC  
CCACCCTTAGGCTGCTGGTGGTCTACCCTTGACAGAGGTTCTTTGAGTCCTTTGGGGA  
TCTGTCCACTCCTGATGCTGT

>1253

GCTGGAAGTGCGCACCTGGGCTGGGCTCGCAGCAAGGCGCAACTTCAGGCTCCGAAG

CGGTGTGTTGCAGATCGAAGCGCTGCAAGAAGTCTTGAAGAAGCTCAAGAGTAAACG  
TGTTCCCATCTATGAGAAGAAGTATG

>1254

GACTGTGAGACTTGCTGTGGGAACCTGGGTTTGTTCATACTCGATGACCACACATTT  
TGTTGTTTCAGTGTGACGCCGGTGAGCAGTGTGCAGTGAGGAAAGGGGCAAGGATCG  
GGAAGCTGTGTGACTGTCCCCGAG

>1255

GCATGTGGAATATTCTGGCTGTGCTGGCTGTGCTGGCTGTGGACTGAGTCCTCTGTCTT  
CCCCATCCAGTGTGACCCCTGGAGGAAGAATGCCTGCTGTTCTACCAACACCAGCCA  
GGAAGCCCATAAGGATGTTTCCT

>1256

CAGTTCTATTCGGGGCTGAGTTGCTGGGATTCTTGAACCTGAGCCCTTCTTTGTATCA  
AAATCACCCAGGTGGATCAGAGCTGGCGCAAAGAGCGGGTACTGAACGTGCCCTGT  
GCAAAGAGGACTGTGAGCAATGGT

>1257

AGTTGTAGGGCTGGCAGACCTCAAGATAGTTCCGGGCCCAGTGGCTAAAGGTCTTCCC  
TCCTCTCTACAGGGTTTAAACAAGTGCGCAGTGGGAGCTGCCTGCCAACCTTTCCATTTC  
TACTTCCCCACACCCACTGTTCT

>1258

GCAGGGCGGATACTGGAGGGGGGCTTGTGGCATCTGACTCTGTATCTCCTACCTGCCCCCT  
CTCCTTGGTAGCTGTGAGAAGTCACTGCTTTGGGGAGACCTGATCTGGCTGTGCCAGA  
TGGACACTGAGAAAGAAGTAGAA

>1259

GAGAGAATCCCACTTTCTTGCTGTTGTGATGGTGGTAAGGGAACGGGCCTGGCTCTGG  
CCCCTGATGCAGGAACATGGAGCTGATCCAGGACACCTCCCGCCCCGCCACTGGAGTAC  
GTGAAGGGGGTCCCGCTCATCAAG

>1260

GGCAGTCCCCACCTTGGTCAGCAAGGTCGTGCCCTCAGCCTGCTCACCTCCTATCTCCC  
TCCCTCTCCAGGCACCACCTGGGTGAGCCAGATACTGGACATGATCTACCAGGGCGGC  
GACCTAGAGAAGTGTAACCGGGC

>1261

GGGTAAGGGAAGTGGAGGAAGACAGGGCTGGGGCTTCAGCTCACCAGACCTTCCCTG  
ACCCACTACTCAGGGCTGGAGACTCTGAAAGACACACCGCCCCCACGGCTCATCAAG  
TCACACCTGCCCCCTGGCTCTGCTCCC

>1262

TCAACAGATGAGCTGGCCTGGGGTGGGCTGTGTGGTGATGGTGCTGGGGCTGGGTCCCT  
CTGCCCCCTGCAGGTGGTCTATGTTGCCCGAAACCCAAAGGACGTGGCGGTCTCCTACT  
ACCATTTCCACCGTATGGAAAAGG

>1263

TGTGAAGCCGAGGGGTGGTGGCTATAACGTACAGCAACCCTGTGTCCGGTGCCCCCTGC  
CCGCTTCTCTAGTGTCTACGGGTCCTGGTACCAGCACGTGCAGGAGTGGTGGGAGCT  
GAGCCGCACCCACCCTGTTCTCTA

>1264

AGATCCCCCTCTGAGGTTAGAGAGGGGGACCCGTTTTGTGTTTGCTCCACTGAGGAGCCC

TCTGCTGCTCAGAACCCCAAAAGGGAGATTCAAAAGATCCTGGAGTTTGTGGGGCGCT  
CCCTGCCAGAGGAGACCATGGACT

>1265

CCTCCCCATAGGCACTTGGGGCCTCCCCTGGGATGAGACTCCAGCTTTGCTCCCTGCCT  
TCCTCCCCCAGGCATGGCTGGGGACTGGAAGACCACCTTCACCGTGGCGCAGAATGA  
GCGCTTCGATGCGGACTATGCGGA

>1266

AAATGCTAATGATTCAAGGATGTCTCAGCTCTGTATGTGTTCTAAGAGTTCTATGTTTT  
TTCTCCACAGAAGGCATAAGAACTAGGAGCTGCTGACATTTCAATATGAAGGGCAACT  
CCACCCTTGCCACTACTAGCAA

>1267

GGAGGCTGGGTTGGTGTGACGCTCTGACCTCTTCCGGTGCTGACCTCTCCTTATCGCTA  
CCTGAATACAGACAAGGACGAGGGTGACCACCCCAACAACAGCTTCAGCCCCTGTAG  
CGCCCATGACCGCAGGTGCCTGCA

>1268

CTCTGACCCCAGGCCTGGGCCTCCTGCCTCTCTTCCCTTCTGCTGAGCAATTTTGTCTTC  
CCCTCCTCCAGCCCCAGGGCTCCTGCCAGAGCGAGCTGCACCGGGCGCTGGAGCGGC  
TGGCCGCTTCACAGAGCCGCACCC

>1269

TGGACTCAGCTCTGGGGCATGGTCTCTTTTCCTGCGTCGGAAGTGAACCCCTCATGTCCT  
TCTCTTGGCAGTGTACCCAGCTCTGGATGGGCAGCGTGGCAAGTGCTGGTGTGTGGA  
CCGGAAGACGGGGGTGAAGCTTC

>1270

ACATCTCGGTGCTGGGCCCCATTCAAGAGTGGAGGGTTCTCCCTCTAACCACTCCCACC  
CACCTCCATCAGATCAGTGAGCGCTATGGCCCCGTGTTCAACATTCACTTGGGGCCCCG  
GCGGGTCGTGGTGCTGTGTGGAC

>1271

GGAGCTAATGCCGTGAAGCTATGTGCATCTCTGTCTGGCCGTACCTGGGTAATAACC  
TGATCGACTAGGCGTGGTATTCAGCAACGGGGAGCGCGCCAAGCAGCTCCTGCGCTTT  
GCCATCGCCACCCTGAGGGACTT

>1272

GGAATTCTGACTCTCCTCAGACCTCTGAGTTGACTCTCTCCCCAACCCCCTTCTCCCGA  
CATACCCGGAGGCGCCAATATCGATCCCACCTTCTTCCCTGAGCCGCACAGTCTCCAATG  
TCATCAGCTCCATTGTCTTTGG

>1273

ATCCCATTCCCATCAGCTCCTGCCCCGTGACAGCTGTCCTTCCCTTCCCATCCTCTCTCT  
GCAACCCCAGCTCTATGAGATGTTCTCTTCGGTGATGAAACACCTGCCAGGACCGCAG  
CAACAGGCCTTTCAGTTGCTGC

>1274

GGTGAACCCCTAGATGGTGCCCTGAGGTCAAGCAGGAGTGAGGTTGTCCTAAAGCCC  
CCTCTCCCTTCAGGAGGAGAAGAACCCCAACACGGAGTTCTACTTGAAGAACCTGATG  
ATGAGCACGTTGAACCTCTTCATTG

>1275

GCCTATCCGGACTIONATCATTTCCTGCTCTGAGACCCCTAGATACCTAAACACATTCCCCCT

CCTCCCCCAGCCAAGGTCCATGAGGAGATTGACAGAGTGATCGGCAAGAACCGGCAG  
CCCAAGTTTGAGGACCGGGCCAA

>1276

TCCAGCCCCTGTGTACTCTCAACAATCCCCCAACCCGCCTCATCACATACACCTTCCTC  
CTCCCTCCCAGGGCATAGAAGTGTTCCCTATGTTGGGCTCCGTGCTGAGAGACCTCAG  
GTTCTTCTCCAACCCCCGGGACT

>1277

AGGTCGGTACTGGGGCGAGGCTGCACTGAGAGTGGGCTTCACCTCCACCCCTCCCGCC  
TCTCCTCCTCAGGAAAGCGGAAGTGTTCGGAGAAGGCCTGGCCAGAATGGAGCTCTT  
TCTCTTCTTCACCACCGTCATGCA

>1278

GATATCTCAGCGCTGGGCCCATTGAGAGTGGGGGCTGCTCCCTCTAACCACTCCCACCT  
GCCTCCAACAGATCAGTGAGCGCTATGGCCCTGTGTTACCAATCACTTGGGGGCCCCG  
GCGGGTCGTGGTGCTGTGCGGAC

>1279

CCTTGGAAGTGGTCCGCTCCTGCTACCACCACCCCTGACCTCTCTCCACCCCCGCGTT  
CACCTCCCCAGGCGTGCGTTGAGCAACGGGGAGCGCGCCAAGCAGCTCCGGCGCTT  
CTCCATCGCCACCCTAAGGGGTTT

>1280

GAATTCTGACTCTCCTCAGACCTCTGAGTTGACTCTCTCCCCAACCCCCCTTCTCCCGC  
CACACCTGTAGGCGCCAATATCGATCCACCTTCTTCTGAGCCGCACAGTCTCCAATG  
TCATCAGCTCCATTGTCTTTGG

>1281

TCCCCATTCCCATCAGCTCCTGCCCCGTGACAGCTGTCCTTCCCTTCCCATCCTCTCTCT  
GCAACCCCAGCTCTATGAGATGTTCTCTTCGGTGATGAAACACCTGCCAGGACCACAG  
CAACAGGCCTTTAAGGAGCTGC

>1282

AAGGAAAAGCCCTAGAAGGGCCCCAAGAGCATGGAGAGTGAGCTTGGTCTAAACCGC  
CCTCTCCCTGCAGGAGGAGAAGAACCCCAACACAGAGTTCTACTTGAAGAACCTGGT  
GATGACCACCCTGAACCTCTTCTTTG

>1283

CTAGGGGGGGCGATACATGCCCTGCTCTAAGACCCCTAGAGAGGGTAAAGATATTCCC  
CTCCTCCGCCAGCCAAGGTCCATGAGGAGATTGACAGAGTGATCGGCAAGAACCGGC  
AGCCCAAGTTTGAGGACCGGGCCAA

>1284

GGAGCCCCTGTGTACTTTACCAATCCCCCAACCTGGCTCATAACACACACCTTCCTC  
CTCCCTCCCAGGGCACTGAAGTGTTCCCTATGCTGGGCTCCGAGCTGAGAGACCCCAG  
GTTCTTCTCCAACCCCCAGGACT

>1285

GGGGTCAGTAGGGGTTGAGGCTGCACTGAGAGTGGGCTTCACCTTCACCCCTCCTGCC  
TCTCCTCCTCAGGAAAGCGGTACTGTTTTGGAGAAGGCCTGGCCAGAATGGAGCTCTT  
TCTCTTCTTCACCACCATCATGCA

>1286

GCCATAGGGTGGCAAGGTCTAGGCCTTCTCAGATTCCGGTGACCCTTGTGTCTCTCTC

ACTTCCTTCAGAAATGCACGTGGCCGTCCTCGGAAGTACCCAGTGAGCGCTCCCATGG  
CTCCCCCTGCAGTTGGGGCGGGG

>1287

GGGCCCCAGGGGCCAGGCCTGCACCACAGCCCTCACTTCCTGACCCCTGCTGTCCCTG  
TGCTGTCTCAGGAGACCTCCAGTCGGAACCTGGTGACCCTGCGTGTGGACCCCAATG  
GCTTCTTCTTGTA CTGGACGGGCC

>1288

GCCTGGGAGTGAAGACCACAGCGAGACTGTGCGGGAGCCCCCTCTTACCCCTTCGCT  
GTCACCTACTCAGGACCCCAAGATCCGGGAAGTTCTGGGCTTTGGGGGTCCCGATGCC  
CGGCTGGAGGAGAAGCTGATGACGG

>1289

GACCTGGGTTGTGGCTGGGCAGCCCCTGTGTCCCCCACTCACCGCCTCCCCGTGTATA  
CTGGCCCCCAGGTCTGGTCTGAGGAGCTATTCAAGCTGGCTATGAACATCCTGGCTC  
AGAACGCCTCCCGGAACACCTTCC

>1290

ACCTTCCTCCTGCCCTGACCTTGGTGACCTTTGTCCTCCACTGACCCTGAACCCCTCCT  
GCCCCCATCAGCATCCTGAAGATGTTCTCAGCAGACAAGAAGCGGGTGGAGACTGCG  
CTGGAATCCTGTGGCCTCAAATTC

>1291

TCACGGTGGACACCCACCCTTACGGGGGTGCCCCGCCCTGGTTTCTACCCCCACACTC  
CTCGACCTCCAGAGTGAGTCCATCCGGCCTGATGAGTTTCTTGGAAATCTTTGAGCG  
GTTCTGAACAAGCTGTGTCTGC

>1292

GGCAAGGGCTTGGCGACGGGGTGGGAGCCCTGCCAGGCTCCATCCTGACCCAGCTTC  
CTGTCCCCCTCCAGAGGCGCCAAGGGCAAGCCATACCTGACGCTGGAGCAGCTCATGG  
ACTTCATCAACCAGAAGCAACGCGAC

>1293

CTGGCTGGGGTGCAGGTGGGTGGGGGCAGGTGGGACACCAGCTGACCCTGCTGATCC  
TCTCCCACCCAGACCAGATGTCCATGGAGGGCTTTAGCCGCTACCTGGGAGGCGAGG  
AGAATGGCATCCTGCCCCTGGAAGC

>1294

CCAGGTGGGACCGGGGTGGTGAGGAGCTGGGCTGGTGGGCGGCCTCGGTGACAGAG  
CCTCGCCGCCCCAGCGGGGCAGCTGGCTGGGACCTCGTCGGTGGAGATGTACCGCCA  
GGCACTACTATGGGGCTGCCGCTGCGT

>1295

TGACATGTCCCGTAGACCTCAGCTTCCTCTCTGGGGGAGGGATCTCTGACCTCTGACCT  
CGGTTCCGCAGGGCAAAGCAACAGGCAAAGATGGCTGAGTACTGCCGCTCCATCTTTG  
GAGACGCGCTACTCATCGAGCCT

>1296

AGGGGGGTGGCATGGGGGCCAGGGTGCTGCGGACCCGGTCCAGGGCCCTGACTCGTC  
CATGCCTGCCAGCTGGCCCCAGGCGTTCCCCTGCCAGCCCCAGGACCTGATGGGC  
CGTATCCTGGTGAAGAACAAGAAGC

>1297

AAAACCCCTCCAGACTTCCTAAGCAGCTGTGTGGTCCTGACCCCTCACCTGTGGCCC

TGTCCTCTGCAGGGTCTCCCAGCTCTGACAGCTGCCCAGGCCTGAGCAATGGGGAGG  
AGGTAGGGCTTGAGAAGCCCAGCCT

>1298

TGGGGGGCAGGTGAGGGAATGGCCAGCTGTGGCGGGAATGGCACTGCTGACCCTGGG  
TTGGGGCCACAGGGCACAGCCAGCAGCGAGGTGAATGCCACTGAGGAGATGTCCAC  
GCTTGTCAACTACATCGAACCTGTCA

>1299

GTGGCAGGCATGGGAGCTTGCCCAGCTCAGCCCTGCCAGGTCTGACGCCCTTTCTTGG  
CTCACCCCTAAGAGAGGAACAAATGCTTCGAGATGTCGTCCTTTGTGGAGACCAAGGC  
CATGGAGCAACTGACCAAGAGCCC

>1300

GCTGAGGCCGGAGGTGGAGGCTGATGGGGTGGGCCCTGGCACCTGTGTGGCCCCTGA  
CCACCAATCTCAGATACAACAAGCAGCAGCTCAGCCGCATCTACCCCAAGGGCACCCG  
CGTGGACTCCTCCAACTACATGCCC

>1301

TCTCCCATTTCCCCACATGGCACCGTCCTGCCTGATCCCTGCCCCTGCTCGACGTGCCCCG  
TGGCACCCCAAGATGTGGCGATGCAGCTCAACGCGGGCGTTTTTTGAGTACAACGGGCGC  
AGCGGGTACCTGCTCAAGCCGGA

>1302

GGCTCAGGCCAGGGGTGTCCTGGGGGCAGGACTCTCAGCATCCGCCTCACCCCTCCTTG  
GCCACCCCAAGGTGATCTCAGGGCAGTTCTGTCCGACAGGAAGGTGGGCATCTACG  
TGGAGGTGGACATGTTTGGCCTCC

>1303

GTTAGCTGTGGCCTGGTAGCCACAGTGGCCCAGGGTCAGCCCTGCGGCTCAGCTCCAG  
TCTGGCCCAAGGTGGTGCTGCCCACGCTGGCTTCACTTCGCATTGCAGCCTTTGAGG  
AGGGGGGTAAATTCGTAGGGCACC

>1304

CAGCACAGCGGGCAGTGGGTAGGGCCCCCACCTGGCCCAGCAACCCAACGTTGCCTT  
CCTGACCACCAAGGATACCACTACGTCTGCCTGCGGAACGAGGCCAACCAACCGCTGT  
GCCTGCCGGGCCCTGCTCATCTACAC

>1305

ACCAGAGGTGGCGGGTGGGGGTGGCCTGGGGGCTCTGTCTCTGAGACCTTGGCCTTC  
TGCCTCCCCCAAGTATGCGGAGGCCCTGATCAACCCCATTAAGCACGTCAGCCTGAT  
GGACCAGAGGGCCCGGCAGCTGGC

>1306

GTGGTAGAGGACAGAAGGGTCTGGAGGGAACAGCATTCTCTGAAAAGAGCATTCTCC  
TTTCTCCCTATAGGCTCAGGCTGGCCAAGAGACGTGCCAGGACACCCAGTCTCAGCAG  
CTGGGGTCTCAGCCGTCTCAAACC

>1307

GTACCTGGAGGCAGGGGGTTGCCTTGGAGGTTCCCCACCCCCGCCCACCTTTGGTC  
TGCCGCTCCCAGAGGTGGCCCCACCCCGCTGGATGAGCTCCGAGGTCACAAGGCTCT  
GGTCAAGCTCCGGAGCCGGCAAGA

>1308

CCCTACACACCCTCCCCATCCCAGTCCATGTGACGGGCCCAGGCATCACCCAGAGGGG

TTCTCCTCGCAGAGGTGGGGCCGCTGATGTGGAGGACACGAAGGAGGGGGAGGACG  
AGGCAAAGCGGTATCAGGAGTTCCAG  
>1309  
GGCCAGGGAAAGCCTGCTGGATAGACCCGTCGTCAGCCCGGCATCACCTGTCAGCTCC  
CTGTGTCCACAGGCTCTGCAGCGGCTCAGGGAGGTCGTCCTTGATGCAAACACAACCTC  
AGTTCAAGAGGCTGAAAGAGATGA  
>1310  
AGTACCAGAAGGAGGGCAGAGTCTGTGCTTCTGCCGCTGACCCCTCCTCTTCCCCTGC  
CGGCTTCTCCAGGGAGAAGAAGGAGCTGCAGAAGATCCTGGACAGAAAGCGCCATAA  
CAGCATCTCGGAGGCCAAGATGAGG  
>1311  
CCAGCCAGAGCCTCGAGGCTCTAGCCCCCTCCCTCAGGGCCCCCTCAGCTGAGCCCTTGC  
CCACGCCTGTAGCTGGAGGAGGCCCAGAAGCAGCGGCATGACCGTCTTGTGGCTGGG  
CAGCAGCAGGTCCTGCAACAGCTGG  
>1312  
GGCGAACAGGTGGGCAGACGGTGTGCAAGGCAGCCAGGCCTCGCCTGTGATGCCCAT  
CCTTCTCCACAGCTGCTGGCCCAGCTGGCCCAGGAGTGTGAGGAGCAGCGGGCGAG  
GCTCCCCCAGGAGATCCGCCGGAGCC  
>1313  
GGGGAGGAGGGAGGCAGGCATGTCAGGGGTGGAGGGGAGCTCTTGGCCATGAACCTC  
TTCATCTCCCCAGATGTCCCCAGTGCCCCACTGCTGCTGACCCTGGATGATGTGAGCAG  
CAGCTCTGTGACTGTGAGCTGGGA  
>1314  
AAAGAAGCCCCATGGAGAGGGGGCGCCTGTGGCCACATTGCAAAGACCTCACACTCTC  
TCCATCCCCCTCAGGCTCGGAGTGGGTGCCTGTGAGTGCCCGGCCCATGATGGTGACCC  
AGCAGACTGTGCGGAACCTGGCTCT  
>1315  
TGCCCCATCTCAGAAACCCCAATCAGCCACCCCACTGCACTGCTAAGCCCAGACTCTT  
GCTTTGATCCAGAGGCCCCCAAGATCCGTGTCCCCCGCCACCTCCGTCAGACCTACATC  
CGCCAGGTGGGAGAGACGGTCAA  
>1316  
TCCTGGAGTTAAGGAGGTGTGGGGACTCTGGCACCTCCCTACACTCACCTTGGGGGCT  
CCTCCCTGCCAGGGGAAGCCTAAGCCTCAGGCCACATGGACCCACAACGGCCATGCCC  
TGGACAGCCAGCGGGTGAGCATGC  
>1317  
ATTTTGGGTGTGGGGGCTCTGTGCCAGCCTGGCCCTCACACTCACTTCCTCTCACACTC  
TGGGCCTACAGAGAAACCTGGACCCCCCTGCTGCATCAGGCTCCTGGACGTCTGGGGC  
TGCAATGCTGCTCTTCAGTGGAC  
>1318  
AGGTCTCCAGGGTAAGCAGGGAGGGTGAGGACAGGGGTGAGAAATGAGGGTGACAC  
CCGGGGCCCTGCAGCAATGGTTCACAGTGCTGGAGCGCTACCACCAACCACCTGCAC  
CATCTCTGACCTCATCATCGGCAACT  
>1319  
TAGTCAGTCCTGACAGGTCTCCCTCACTCCTGTAAGCTCAGATGCACCCGACTTTCTCC



CCTGAACCCAGATATTGCTGCCAAACCTAAAGGGTTTATTGAGCGAGACTTCTCAGAA  
GCCCCCTCATTCACCCAGCCCCCT

>1320

CTGGGGATAGCTGTTGAGAGCCCCGCCCCAGTCCATACCTCCCCAGCTCTCTTCTGACC  
ATGTCTCCCAGCCCAAGATCATCTGGATGAAAAACAAGATGGAGATCCAGGGCAACCC  
CAAATACCGCGCCCTCTCTGAGC

>1321

CTCTGCACCTCTCTGGCCTGCAGCCGAGCTCTGCTCACACCAGGGGCTCAGGAAGCAT  
GTCCTCCTCCAGGTGCTGCAGGCCTGAGGGGCCAGGTCCACCAGGCCTACAGTCAAA  
CTCCAGAGATGCCCAAGACCCCCGC

>1322

TGGACATGCCAATACACATTACTGACATGTATGCCACCTGACCTGCACCCACTCATGC  
CCTCTCTGCAGGGCAGCGCTCGCCATTGAATGACTTCCAGGTGCTCCGGGGGCACAGAG  
CTACCTGCTACATGCGGTGGTGC

>1323

CTGGGCCTAGATAAGACTGGGGGCAGGGGAGCCTGGGCCGTGGCGTTACCTGTGCCT  
TCTTCTCTCCAGGGCCTTCCACTACAATGTGAGCAGCCATGGTTGCCAACTGCTGCCAT  
GGACTIONAACACTCGCCGCACTCG

>1324

GGGGTGGAGAGGGGCAGGGTGGGAGACAGGGGACCTCAGCCCAAGTTGATCTTCTGT  
CTCTTGCTCCCAGACTACATACGGACCTGCATCATGAACAATGGGGTTGGGTACCGGG  
ACACCATGGCCACGACCGTGGGTGG

>1325

AACACCTTCCCTCCATCCCGGCCTGGGACCTTCCCCCAGCACACACTATAGTGATGCTC  
TGGGCCCTCAGGTACATGCCACGCTCCGGAATGGCCTGGAAGAGAACTTCTGCCGTA  
ACCCTGATGGCGACCCCGGAGGT

>1326

CGGGTCAAGCTGGGAGAGTGGAGGGACAAGCCACGCCCATCCACGAACCCACTGGC  
TCTTTGTCTCCAGCCGCGTGTGTCTGGTGCAATGGCGAGGAATACCGCGGCGCGGTAG  
ACCGCACCGAGTCAGGGCGCGAGTG

>1327

TAGGGCAACTGGGCGGGGCCAGATAAGCCAGAGTCCCAGGGTCTTCTTCACGCCCCAT  
TACCGCCCCCAGGTTCTCGACCAAGGTCTGGACGACAACTATTGCCGGAGTCCTGAC  
GGCTCCCAGCGGCCATGGTGCTAC

>1328

CGGGAGGAGGGTAGTCACAGGCTTAGGGCTGGAGGCTGGCGGGCTAGGGCTGAGTGC  
AGCGCCTGCTTAGAGACCTTCGGGAGAACTTCTGCCGGAACCCCGACGGCTCAGAGG  
CGCCCTGGTGCTTCACACTGCGGCCC

>1329

GGGGCTGGAAGCCTGGAACCGAAGGGCCGGGGCGAGGTCTCGGCCTGATGGCTGCCT  
GCACCCGCCGCACTGCTACCACGGCGCGGGGGAGCAGTACCGCGGCACGGTCAGC  
AAGACCCGCAAGGGTGTCCAGTGCCA

>1330

TATGGGTCAGGCCCTTTAGCCACGACATCCACACAGTCTGGGTTTCATCCAGCCCACC

CCATCCTACAGACCAGGTGCAGTTTGTGAGAAGTGTGGCAAGAGGGTGGATCGGCTGGAT  
CAGCGTCGTTCCAAGCTGCGCGT

>1331

AGCCAGAAGATGGCAGGTCTAGCATCTGTCCCAGGAGTCTGTTCCCTGTCCTAATTCCC  
CACTCCTCTAGGCAGGGCCAGCATTCTGCGGGGGTCTCTAGTGAAGGAGCAGTGGA  
TACTGACTGCCCCGGCAGTGCTTC

>1332

CAAGCTAACAAGTGAGCCTTGGGGCAATGGACTGAGAGTCACAAATGACCTAGCAGA  
GCTTCTCTCCCAGCCATATGCCTCTCACGGGCTATGAGGTATGGTTGGGCACCCTGTTT  
CAGAACCCACAACATGGAGAGCCA

>1333

ACCTGGGAGGGTGTGAGGTGGGGCTGAGCCTTGTGGCCTCAGACCCTGAGTGCCCCC  
ATTCTTGCTAAAGATCTGTGACCCTGAACCAGCGTGTGGCCCTGATCTGCCTGCCGCCT  
GAATGATATGTGGTGCCTCCAGGG

>1334

TGGCGGCCAGGAGCCCAGCCCTGGATCTTCCTCCAGGACCGTCTCCTTCTCCCCATTCC  
CCTCACTGCAGGTACGGGTAATGACACAGTCCTAAATGTGGCCTTGCTGAACGTCATCT  
CCAACCAGGAGTGTAACATCAA

>1335

AACTATTTTATCATGAAGCAGGCTAGTCATGGCTGTGGCCCCGGGGCCTCATCAGTTCTC  
CTACCTGCCAGAGTGACTACGGGGGGCCACTTGCCTGCTTTACCCACAACCTGCTGGGT  
CCTGAAAGGAATTAGAATCCCCA

>1336

TATTGGGTTTTTTTAAGAATCAGTTCTTAGATTCAATTTATCAATTCTAGTTTTTTGTTGTT  
GTTTTTAAGGACTCCTGAATATTTTCAAACTGAACAATTCAGCCATGTCTGAGCTT  
TCCGTCTTCCTGGAGGCACA

>1337

ATTATGCAGGAAACATTTAGTAATTTCAACATAAATATGGGACTCTGACGTTCTCCTCTT  
CATTTTGCAGAGCAGTCATTATGGCGAACCTTGGCTGCTGGATGCTGGTTCTCTTTGTG  
GCCACATGGAGTGACCTGGGC

>1338

TTTGGCCAGTTTTTTGCCTCTGCATTCACCTCCACCTTGAATCTTTTCCTTTCCCCACCC  
TGGGCCTCAGCACCCCCAAACAGGCGAACCTGTGTGTTCTTTGAGGCCCTGGAGTGC  
GGGGAAGCACAAAGACACTGGG

>1339

TTCCACACCCCATTGTGCTTTCTTCCTTGCCCCCCTTTCTCTCCTCTTCCCCTAATCCCA  
TCCCATCAGGATGCCGAGACAGTGATGAGCCAGGCTGTGAGTCCCTCCACTGTGACCC  
AAGTCCCCGAGCCCACCCAG

>1340

CAGGAGGGGAAGAGCAGAGAGCAGGTTTGGGTCAGTGCTCTCCAGCCTGCATTCTTG  
CCTTGATGTCCAGGTGAGTCCATCTGGATGGCACTGGTGCTGCTGGGGCTGTTCTCCT  
CCTCCTGCTGCTGCTGGGCAGCAT

>1341

CTTTCACGAAGTCCCTTTTCCTGTCCCTATGCATTTGCACCCTGACCCTAAGGCTCTTG

TCTGTTCCAGCCCTGCTACAGCGAAAGAACTACAGAGTGCGAGGTGAGCCAGTGCCA  
GAGCCAAGGCCAGACTCAGGCAG

>1342

GTTGTGCTGGGGAGGAATCCTGGCCCTGTTATAGCTCAGAGGCCACACTCAGCACAG  
TGTCCCCAGCAGGTAATCCGGGAAGGAGGTCATGCAGTGGTTTGGGCCGGGCAGCTG  
CAAGGAAAACCTGGTTGCCATCAAGG

>1343

CTCTGCTCCCTGGGATGGATCAGCCGTCTCCAGCTTTGTGTACCATCCTTTTCTCTCTGC  
GTTTCCCAAGGGCTCCCTGTGCCACTACTTGACCCAGTACACCAGTGACTGGGGAAGT  
TCCCTGCGGATGGCACTGTCCC

>1344

CGCCGACTCAAAAAAAAAAAAAAGAGGGAGGAAGAAAATCCATGTTTCCTTCAACCTTG  
GATCCCCCACAGGCCAATATAAACCAGGTATTGCCACCGAGATCTGAGCAGCCAGA  
ATGTGCTCATTGCGGAAGATGGATC

>1345

TGCATGGACCATTGCTGCAATGAGGATTGCCACAGAGATGATTCTTGGCCCTTCGTGCC  
TTGCTCTCCAGGCTGGCACCCAGAGGTACATGGCACCAGAGCTCTTGACAAGACTCT  
GGACCTACAGGATTGGGGCATGG

>1346

TGTCTTGGCCCTTCTACATGGTAGGCACCCCTAGGACTAACTGATACCCAGCCCCCTCTA  
CCTTCCTCCAGACAGCAGTCCACCACCTTCCAACCTGGCCTATGAGGCAGAACTGGGC  
AATACCCCTACCTCTGATGAGCT

>1347

AGATGGCTTTTAACCCTGGGGCCCACTCAAGATCCTAGGGTCAACCCTTCCTCCCTGTC  
ATTCCCCCAGGACCCTGATGGGCTGAGGGAGCTCCTAGAAGACTGTTGGGATGCAGA  
CCCAGAAGCACGGCTGACAGCTG

>1348

GCTCTCTTGCGGAAGTCCCCCATGCTGGCCCTTGACCCTCATGAACCCTGCTGCAAC  
CCTGTGTTTCAGGCCGCGTCATTCTACTGCAGCAAGATGGGCTTTGAACCTCTAGCCTA  
CAGGGGCCTGGAGACCGGTTCCC

>1349

GGAGACTAAAAGCCAGGTGAGGGGACCTAGACTCCAGACTCCAGTGCCATCCTCTCC  
CTGCCGGCCACAGAGATGGGCGATCACCTGGTGAAACACGGTGACGGAGTGAAGGAC  
ATTGCGTTCGAGGTGGAAGATTGTGA

>1350

TATGAAATGTGCTCTGTCCTCGGCGGGGATGGGTGCCCAGGGGCCGAGCCAGGCTGTT  
TTCCACCCGTAGTATGGGGACACCACACACCCCTGGTGAGAAGATGAACTACATCG  
GCCAATTCTTGCTGGATATGAGC

>1351

GAGGGGTCATGGAGAAGGGAGCAATCTGGGGGGTAGCCACCTTCTCACCCCCATCTTC  
TTCCCTTCCCAGGCCCAAATGCAGTCTGGAGATGATCGACCACATTGTGGGAAACCAG  
CCTGATCAGGAGATGGTGTCCGCC

>1352

GTGGAAATGGGTGATGGAGGCCGTCCCTGGAGGCGCTCAGAGCATATGTGTTCCACCG

CCCACCCTACAGGTACCTGAAAAACCTGCAGTTCCACCGCTTCTGGTCCGTGGATGAC  
ACGCAGGTGCACACGGAATATAGC  
>1353  
GGGCTCTTGTAGGGTCAGGGATGTGGGTGATGGGGCAAATGACAGTGGTCTCCTTGTT  
TCCCTCCCCCAGGAATATGTGGACTATAACGGGGGCGCTGGGGTCCAGCACATCGCTCT  
CAAGACCGAAGACATCATCACAG  
>1354  
AGCACCTCCACCTGGCTAGGGGAGTTGAACTTGGAGGCCGAAGGCTGACCTCAGCTT  
TGCTCTGAAACAGATTCGCCACTTGAGAGAGAGAGGCCTGGAGTTCTTATCTGTTCCC  
TCCACGTACTACAAACAACTGCGGG  
>1355  
GCCCCTGTGGACTTTCCAAGGATCTCACCGTGCCAGCCTCCCCTAGCAGAGCCCCCTG  
TCTCCCGCCTAGGAGCTGAAAATCCTGGTGGACTACGACGAGAAAGGCTACCTCCTGC  
AGATCTTCACCAAACCGGTGCAGG  
>1356  
CGAGGGGACAGGCAGCTAGCACACTCGGTTTTCTGGGTCCTTGGCTCATCTCCTCTCTT  
TCCCGCCACAGGGTTTTGGAGCCGGCAACTTCAACTCACTGTTCAAGGCTTTCGAGGA  
GGAGCAGAACCTGCGGGGTAACC  
>1357  
GCCAGGAAGGGGTAGCGGGGCAGTGCAGTGTGCGGGGAGAGCGGCTTGCTGCCTCGT  
TCTTTTCTTGCAAGCCCCAGGATGCAGGCCCTGGTGCTACTCCTCTGCATTGGAGCCCT  
CCTCGGGCACAGCAGCTGCCAGAA  
>1358  
TGAGGAGACAGTCCCTGTGCATCTCTGCGAGTCCCTGAACTCAAACCCAAGACTTCCT  
GTCTCCTGCCAGGGGCTCCCCAGACCCGACAGCACAGGGGCGCTGGTGGAGGAGGAG  
GATCCTTTCTTCAAAGTCCCCGTGA  
>1359  
GTTCTGGGAGGGGGCTTGATTTGGGGCCCTGGTGTGCAGTTATCAACGTCCACATCCTT  
GTCTCTGGCAGGAGCGGAGCAGCGAACAGAATCCATCATTACCGGGCTCTCTACTAT  
GACTTGATCAGCAGCCCAGACAT  
>1360  
GGCAGGCTCTCAAAGACGGGATGCTTGTGTCGAGTCTCATAACGCTAACCTCTGCTCC  
GCCTCTTCTCAGAGCTGCGCATAAAATCCAGCTTTGTGGCACCTCTGGAAAAGTCATAT  
GGGACCAGGCCCAGAGTCCTGAC  
>1361  
GGGACACAGCATGGCGCCACTGTCTTTCTGGTCTCCTGGGGCTCAGACTATGTCATACA  
CTTCTTTCCAGGGCAGTGGGTAACAAAGTTTGACTCCAGAAAGACTTCCCTCGAGGAT  
TTCTACTTGATGAAGAGAGGAC  
>1362  
TCCTGGCTGTGTCTGTCCCCCGGCTTTTGGGCTCTGAAGGACTAACCACATGCTTTCTC  
ACTTGTCTCAGATTGCCAGCTGCCCTTGACCGGAAGCATGAGTATCATCTTCTTCCTG  
CCCCTGAAAGTGACCCAGAATT  
>1363  
CAAAGGGATCCCTTGGTTGGGGTGTTGGGGAAGGCAGGGTTTTAACGGAAATCTCTCT

CCATCTCTACAGAGCTGCAATCCTTGTGTTTGATTACACCAGACTTTAGCAAGATCACAGGC  
AAACCCATCAAGCTGACTCAAGG

>1364

ATCTTCCTGCAGACTCACAAAAGGCAGCTGCCCAAGCAGGGCCTGACCCCTCGGTGTC  
CCCTCCCCACAGTACTGTGCAGCCCTGGAATCCCTGATCAACGTGTCAGGCTGCAGTG  
CCATCGAGAAGACCCAGAGGATGC

>1365

AGCCCTGGTTTGTGCGAGTCGTCCCGGCCTCTGGCGTTCTACTCACGTGCTGACCTCT  
TTGTCCTGCAGCAGTTTTCCAGCTTGCATGTCCGAGACACCAAATCGAGGTGGCCCA  
GTTTGTAAGGACCTGCTCTTAC

>1366

GGAGAGGAAGAGCCAGGCTTTAGCTCCCATCTCAGGGGTGGGGGATTTTTGACTCTAC  
CTCTCCCCACAGATGAGCAGCAGCTGCTCAGGGCTGAGCAGGGTCCCTGGTGGCCGTG  
GCTACAGCCCTGGTGTCTGCCTCCT

>1367

GAGCTGTGGCATGGTCTGACTTATGCTTGACATCTTGTCTTTGTCCATTGTCACCTCATC  
TCACTTCCAGGGACCCAGTGTCTTGGTTTCGGGATGGGGAGCCAAAGCTGCTCCAGG  
GACCTGACTCTGGGCTAGGGCAT

>1368

CTAAGTAAGCCCTCTGGGACCAGGAGGACCTGAGGACTGCTCAGTCTCCAGGTGTACC  
CTCTGCCTCTAGACCCTCCAGCCCGCCCTGTTGTCTCCTGCCAAGCAGCCGACTATGAG  
AACTTCTCTTGCACTTGGAGTCC

>1369

GCATGTGGGGGCTCCAGCTGGGTCCCACAGTAGGCATTTTCAAAGCCAAAGACCACAT  
CCTCCCTTCTAGGAGGAGTCCATCCACAGGGCCCTGGCCATGCCACAGGATCCCCTA  
GGGGCTGCCCCGCTGTGTTGTCCAC

>1370

ACTTTGGGAAGTGGTGGGGAAGTGATGGAGACCCATAGCCTACCCTGACTTTGTGTCT  
TGATGCCCTTAGTGCGCCCTGACCCACCCCAGGGCCTGCGGGTAGAGTCAGTACCAGG  
TTACCCCGACGCCTGCGAGCCAG

>1371

CTTTGTAGATGGTGGCTGGGAAGGCCCTGCACTTACAAGCTGGGTAACAGTGAGTCAT  
GTTTACCCCCAGGTGGAGCCAGCTGGACTGGAGGAGGTGATCACAGATGCTGTGGCTG  
GGCTGCCCCATGCTGTACGAGTCA

>1372

CCTTGAGCACAGGACGTGACCCCGTCCCCACCAGCGTATGGACACTTATTGGGTCTT  
GCCTTCCTTTAGGGACCATAACCAAAGGAGATACCAGCATGGGGCCAGCTACACACGCA  
GCCAGAGGTGGAGCCTCAGGTGGA

>1373

AACCCAGAGAAAAGGGGACACCGAGCTTGGTCAGGCTTGCTCTCAGTGACATGTGG  
CCCTCCCCCTCAGATCACAGGGACTCTGTGGAGCAGGTAGCTGTGCTGGCGTCTTTGG  
GAATCCTTTCTTTCCTGGGACTGGT

>1374

TAATAAACCCCTTTGGCGGAGACTGAGATAACCCACATTGTTGGAGAGACAGCTGCCTT

TCTATGCCCCAGGCTGAGGCTGAGACGGGGTGGGAAGGATGGATCCCCAAAGCCTGG  
GTTCTTGGCCTCAGTGATTCCAGTG

>1375

TCATTCTCAGGGTGTCTGGGCCAAGATCCGGTCTTACTGTCTCTCCTGATTGCTCCT  
GCTTCTTCTAGGAGCTCCAAACCTGTAGAGGACCCAGGAGGGCTTCGGCAGATTCCAC  
CTATAATTCTGTCTTGCTGGTGT

>1376

ATCAGAGCTCCTGGGCTGCATAGGAGTGGCCAGGCTAACAACCTGACCCCTTCCCTTC  
CTCCCTGGGCAGCTCCCTGCGGTGTGGCCCCCAAGCACGCATCACAGGTGGCAGCA  
GTGCAGTCGCCGGTCAGTGGCCCTG

>1377

GGGGTTGGCAGTGGGGGTGGGGAACAAGGAGAGGTCTCCTGGGTCTCAGCCTTTGC  
CCCCTGCCTGCAGCGAGCACCACAAGGAAGCCTATGAGGTCAAGCTGGGGGGCCCACC  
AGCTAGACTCCTACTCCGAGGACGCC

>1378

GGTGCCTAGAGGTGTGGAGGGGCACCTGACTTGGGGAGGGGGCCCAGGGTAAGCCTCT  
TTTACCCCCACAGTGAGCCTCCTGACGCCCAAGCCACTGCAGCAACTCGAGGTGCCTC  
TGATCAGTCGTGAGACGTGTAAGTG

>1379

ATGACCAGTGCAACTTCGGAAAGGAGGCCTGGCCCGGTCTGATGGCTGCTGTGTGGC  
TTCTCTCCTCAGGGTGACTCTGGGGGGCCACTCTCCTGCCCTGTGGAGGGTCTCTGGT  
ACCTGACGGGCATTGTGAGCTGGG

>1380

ACTCCAGGAGTGGGGGCGGTGCGTCCTCCGGCGCGCAGCGGTGGCCACAGCTCTCCT  
CCCGCCGCGCAGGTCTTCCTACCGCTTTGCGCGCCCCGAAGCCGACCCTGCGCTAC  
TTCACCACCGAGCGCTTCCTGCCCC

>1381

TGGACATGCCAATACACATTACTGACATGTATGCCACCTGACCTGCACCCACTCATGC  
CTACTCTGCAGGGCAGCGCTCGCCATTGAATGACTTCCAAGTGCTCCGGGGCACAGAG  
CTACAGCACCTGCTACATGCGGT

>1382

ACTGGGCTAGATAAGACTGGGGGCAGGGAAGCCTGGGCTGTGGCGTTACCCTGTGCCT  
TCTTCTCTCCAGGGCCTTCCACTACAACGTGAGCAGCCATGGTTGCCAACTGCTGCCAT  
GGACTCAACACTCGCCCCACACG

>1383

GGGGTGGAGAGGGGCAGGGTGGGAGACAGGGGACCTCAGCCCAAGTTGATCTTCTGT  
CTCTTGCTCCCAGACTACGTACGGACCTGCATCATGAACAATGGGGTTGGGTACCGGG  
GCACCATGGCCACGACCGTGGGTGG

>1384

AAACACCTTCCCTCCGTCCCGGCCTGGGGCTTCCCCAGCACACACTATAGTGATGCTC  
TGGGCCCTCAGGTACACGCCCACTCTCCGGAATGGCCTGGAAGAGAACTTCTGCCGTA  
ACCCTGATGGCGACCCCGGAGGT

>1385

GCCGGGTCAAGCTGGGAGAGTGGAGACAAGCCCACGTCCATCCACGAACCCACTGGC

TCTTTGTCTCCAGCCGCGTGTGTCTGGTGCAATGGCGAGGAATACCGCGGCGCGGTAG  
ACCGCACGGAGTCAGGGCGCGAGTG

>1386

TAGGGCAATTGGGCGGGGCCAGATAAGCCAGAGTCCCAGGGTCTTGTTACGCCCCAT  
TACCGCCCCCAGGTTCTCGACCAAGGTCTGGACGACAACTATTGCCGGAATCCTGAC  
GGCTCCGAGCGGCCATGGTGCTAC

>1387

CGGGTTTGGTCCCAGCCCCAGAGGGATCTCAGCTCTCGCTCGGGGGCCGACCTATCTC  
GGTCCATCTAAGGGTCCGAGGCACAGCCCCGCCAAGAGGCCACAACCTGTCAGCTGCT  
TCCGCGGGAAGGGTGAGGGCTACCG

>1388

CGGGAGGAAGGTAGTCACGGGCTCAAGGCTGGAGGCTGGCGGGCTAGGGCTGAGTG  
GAGCGCCTGCTTAGAGACCTTCGGGAGAACTTCTGCCGGAACCCCGACGGCTCAGAG  
GCGCCCTGGTGCTTCACACTGCGGCCC

>1389

GCCGGGCTGGAAGCTGGAACCGGAGGCCGGGGCGAGGTCTCGGCCTGATGGCTGCCC  
GCACCCGCCACAGACTGCTACCACGGCGCAGGGGAGCAGTACCGCGGCACGGTCAGC  
AAGACCCGCAAGGGTGTCCAGTGCCA

>1390

GGTGTCTGGGACCAGAGCCTGGAAATGGTTGAGACTACCCTGCCACGATTTTGCTCCC  
GCTTCCGCCTAGGTTACGTTTACCTCCGAACCGCATGCACAACTGGAGGAGAACTTC  
TGCCGGAACCCAGATGGGGATAGC

>1391

TATGGGTCAGGCCCTTTAGCCACGACATCCACACAGTCTGGGTTTCATCCAGCCCACC  
CCATCCTACAGACCAGGTGCAGTTTGAGAAGTGTGGCAAGAGGGTGGATCGGCTGGAT  
CAGCGGCGTTCCAAGCTGCGCGT

>1392

CAAGAAGATGGCAGGTCTTACGAATCTGTCCCAGGAGTCTGTTACCTGTCCTAATTCCC  
CACTCCTCTAGGCAGGGCCAGCATTTCTGCGGGGGGTCTCTAGTGAAGGAGCAGTGGA  
TACTGACTGCCCCGCGAGTGCTTC

>1393

CAAGCTAACAAGTGAGCCTTGGGGCAATGGACTGAGAGTCACAAATGACCTAGCAGA  
GCTTCTCTCCAGCCATATGCCTCTCACGGGCTATGAGGTATGGTTGGGCACCCTGTTT  
CAGAACCCACAGCATGGAGAGCCA

>1394

ACCTGGGAGGGTGTGAGGTGGGGCTGGGCCTTGTGGCCTCAGACCCTGAGTGCCCCC  
ATTCTTGCTAAAGATCTGTGACCCTGAACCAGCGTGTGGCCCTGATCTGCCTGCCCCCT  
GAATGGTATGTGGTGCCTCCAGGG

>1395

TGGTGGCCAGGAGGCCAGCCCTGGATCTTCTGTCAGGACCCTCTCCCTCTCCCCATTC  
CCCTCACTGCAGGTACGGTAATGACACAGTCCTAAATGTGGCCTTGCTGAATGTCATC  
TCCAACCAGGAGTGTAACATCAA

>1396

AACTATTTTATCATGAAGCAGGCTAGTCATTGCTGTGGCCCCGGGGCCTCATCAGTTCTC

CTACCTGCCAGGGTGACTACGGGGGCCCCACTTGCCTGCTTTACCCACAACCTGCTGGGT  
CCTGGAAGGAATTATAATCCCCA

>1397

GATACATACTCTGGGGCCTGCCTCCCTGGAGATGAGGATGAGACCCCTGTCCCTTGCTG  
TTCTCCAACAGGTGCTGGGAGGCCCTCCTTGGCTTAGGAGGACACTTCCAAAGCTGGG  
GCGCCCCAAGGAGGCACCAAGTGG

>1398

TCGGGGTGCAGCAGACAGTGGACGCGAGGCACAGCGACTACCAGTCACCCACCTGAG  
CCTCCTGCCACAGCCTTCATCTCCGTCTTGGGCGTCTGCCCCCTGTACCTGGATGAGAT  
CCGGCACTTCCTGACCCTATGTCC

>1399

GGGTTGGTGGTTGGGGGGGAGCACGTGTCAGCAGAAGTGACCTGGGATCTCATCCCTT  
GCTCGCTCCCAGGAGTCACTGACGCTGCACAGGTCTGGGGGCCACATAGCCCACCTGC  
ATGTGCTGGCCGTGCACCGCGCCT

>1400

TGTGGCCGGAAGGGACTGAGGCTGGGTGAGTTGCGCCGTTTTCTAACAGTTTTCCC  
ATCCTGTGCGAGACAAAGAAAAGAAGGAACAATGGTTCGTGCCAAAAGGGCCGCG  
CCACGTGCAGCCTATTCGCTGCACTA

>1401

TCTTCATTCATGTAACAAAGAAGCAAGGTAGGTATATAATACCAGTATAACTCTATTTTC  
TATTCCTTAGCCTATGTGCTTCCCAAGCTGTATGTGAAGCTACATTACTGTGTGAGTTGT  
GCAATTCACAGCAAAGTAGT

>1402

AAGTTCTTTGGGGGAAGGGAGTCTTGGATCCATGGGTTTTAATTTACTCTTTTGTTTCTT  
TGTCTTTCAGGGTGCTGCCCCACGTCCCCCACCAAAGCCCATGTAAGGAGCTGAGTTC  
TTAAAGACTGAAGACAGGCTAT

>1403

CATAAGGCAAATCTCAAAAGTTGTTTCATTATGCTTTACATAACCTTGCACTTCTCTCTC  
ATAATTTACAGGATCCAGTGCAGATATTGTGATGACCCAGACTCCACTCTCTCTGTCCGT  
CACCCCTGGACAGCCGGCCTC

>1404

CATAAGGCAAATCTCAAAAGTTGTTTCATTATGCTTTACATAACCTTGCACTTCTCTCTC  
ATAATTTACAGGATCCAGTGCAGATATTGTGATGACCCAGACTCCACTCTCTCTGTCCGT  
CACCCCTGGACAGCCGGCCTC

>1405

TCCGAGGGGCTGGAAGAAAAACAGAGCCTGTCTGCGGTGGAGTCTCATTATATTCAA  
TATTCCTTTTAGGAGCCATTCCGTAGTGCCATCCCGAGCAACGCACTGCTGCAGCTTCC  
CTGAGCCTTTCCAGCAAGTTTGT

>1406

CATCTCTATTTCTCCCTATTTATTGGTGTTTGTATTCTTTAACCTTCCACTCCCCTCCCC  
CTCCCCAGAGACACCATGATTCCTGGTAACCGAATGCTGATGGTCGTTTTATTATGCCA  
AGTCCTGCTAGGAGGCGCG

>1407

CTTGACTCTTCCATCTTTGAAAAAAGTTCATATGCTTTTTCTTTTCCCCTTCCTTCCTAA



CTGTGCCTAGAACATCTGGAGAACATCCCAGGGACCAGTGAAAACCTCTGCTTTTCGTT  
TCCTCTTTAACCTCAGCAGCAT

>1408

ATAGAGTAAACTTGAGAAGAATGTTTGCACAGCCAGGTAAAGTGTTACAAATCCTTCT  
GCCCTCACTTAGGCATCTATATCATAAATCTCAAGAGGACCTGGGAGAAGCTTCTGCTG  
GCAGCTCGTGCAATTGTTGCCAT

>1409

AAGTGCTTACTGGGTGCCAGGATTGTTGCTGTGGAATATCGAGTACCACTAACTTTTAA  
ATTCTTCAAAGAGGGCTGTGCTGAAGTTTGCTGCTGCCACTGGAGCCACTCCAATTGC  
TGGCCGCTTCACTCCTGGAACCT

>1410

GAGCCAGGAAGGTGCTTGCTGTTTGGGTTTGACCAAGTGTCACCTTTTAAATAATCTGCC  
ACTCTTGGCAGGGAGCTCACTCAGTGGGTTTAAATGTGGTGGATGCTGGCTCGGGAAGT  
TCTGCGCATGCGTGGCACCATTT

>1411

GGACTGCTGTCTAGGAAGCAAACTTGTTCAGTCCCTGTAAGTCTCTTCCTCTTTTTTTT  
TTGTAACCCAGATTGAAAAAGAAGAGCAGGCTGCTGCTGAGAAGGCAGTGACCAAGG  
AGGAATTTCAAGGTGAATGGACTG

>1412

GGAGTGGGGTAAGGAAAAATACTACATTGAGGACAGAGCTGATGGGCTTTTTTTGGTA  
TTCTCTTAACAGAAGACTGGAGCGCTCAGCCTGCCACGGAAGACTGGTCTGCAGCTCC  
CACTGCTCAGGCCACTGAATGGGT

>1413

TATTTCTCTTCTTGATACCACTGTGGGGGACATGGCTCTGCCTCTCTGACTTCTGCTTCC  
TTCCCTGCAGACCTATGCCAGATTTACTGGTGCTCCACTGAAGGTACACAAGATCAGCA  
ACCCCTGGCAGAGCCCTTCAG

>1414

GGAATGTGTTGCAACTATGTATGACTAGGCAGCTAAGGGTCTGGTTGGTATACTTCCCT  
CTCAATATCAGGAACTCTGCCTGCCCTTCGGACCAGTCATGGAGAGGTCATCTCAGTTC  
CACACAAGATCATCACCCACCT

>1415

GACTCCTTCCTCCCTGGTGAAGTGCCCTTGCAGCTCCCTAGTGTCCACGCCATGGATAT  
TTCTCCACAGAAGTACAATGCTGATTATGATCTGTTCAGCTCGGCAAGGGGCAGACAC  
CCTGGCCTTCATGTCTCTCCTGG

>1416

GAAGCCCACCTTGAATCAGACAGGTGCACTGGCTCAGACCTACCTGTTTCTTCCTGCC  
CACCCAATCCAGGTACATACTTTTTGGATAGACACCAAGAACTACGTGGAAGTGACCC  
GGAAGTGGTATGCAGAGGCTATGC

>1417

AATGGGAGTGCTTAGGTGGGGAGGTGGCACTGTTCCACAGCTGCAAGCCTACCTGTG  
TCGCCCCTACAGCTGTACCGAGAGGCTCGGGAGTGTCTGACCTGCTCTCTCAGCGCC  
TGGGCTCTCAAAGTTCTTCTTTG

>1418

CTCCAGCTCCATCTTTACCCCTTCTACCCAGTGGTTCTCCTCCATCCCACCCCTTCTCTC

TCTGCTCCAGCCCTGCCTCCTTGGACGCCTTCGTCTTCAGCTACTTGGCCCTGCTGCTG  
CAGGCAAAGCTGCCCAGTGGG

>1419

AGCCCTGGGGAGAGTGGGCAGGGATCCAAGAAGTAGTTCTCCTAACACACCTTCCTTC  
CTTGACCCCTCAGCTGAGGTACCACCGCAACGCCAGACACCAGCAGGCCCCAGAGACTG  
AGGAGGAGCCATACCGGCGCCGGA

>1420

TGGGGTTTAAATACTGGAGATGGAGGCAGACCTGGGGCCAGATGTTCTCTGTGCCCT  
CTTCACCCCTCAGGTTGGAGAGCAGTGACGGGGATGGGGCCTGGTGCCCCGCAGGGTC  
GGTGTTTCCCAAGGAGGAGGAGTAC

>1421

CCAGGCCTGATGAAGGGATGGGGGATGGAGTCTTAGTGCCTCTGACCCCCACCCTCTT  
ATTTTTTCCCAGATGGACTCCTGTCTTACACCGCCCCTGTGGGGCAGACAATGTATTTAT  
CTGAGGCCGTGTACCTCAACGA

>1422

ATGCAGGGTGCCGTTGGGGTGCCCCCACCCTCCTAGCCTTGACCCTGTGCCCTCTTCC  
CTTCCCCCAGGTCCACTGTAACAACATGCACACGCTGGGAGCCCGTCTGCCTGGCGG  
GGTGGAATGTGCTTCCGGCGTG

>1423

CACTGCCTCTGCCTCCCTTGGGTCTCCTCCTCATTTACCTCCCTCCTTTCTTTTTGTTCCT  
TCTCCCCAGATGTGGTGAACAATTCCTCTCCGGCACTGGGAGGCACCTTCCCGCCAGC  
CCCCTGGTGGCCGCCTGGCCC

>1424

CTTCTCCCTGGGCCTCCCCCTCGGCTAGGGTGGGACCCTCCTGTGGTGCTGACCCTGCT  
GCCTCCACCAGAGCTGGAGCCCAGAGGCCAGCAGCCCGTGGCCAAGGCCGAGGGGA  
GCCCCACCGCCATCCTCATCGGCTG

>1425

ATGGACACAGCAGAGGGCCAGGCCGTGTGTGCTGAGCAACACGGGTGATGCCTCCCA  
TCCCTATGACAAGGCTGAACGGAGGGTGTTGGAAGAGGAGCTGACGGTTCACCTCTCT  
GTCCCTGGGGACACTATCCTCATCA

>1426

AGGTCTCCCTGTCTGTCTAGCCTTGAGTCTCATCCCTTCCCCGTGTTTCCCTCCTCCTT  
CTCCCGACAGCGTTGCTGCTCTCCAATCCAGCCTACCGCCTCCTTCTGGCCACTTACGC  
CCGTCCCCCTCGAGGCCCGGG

>1427

GTGTGGGGAACTATAGCTCTTGGGCTGTTCCCTGATGCCTCGTCCTGTCTTCTTTCCCTC  
ACCCCTGCAGCCTACAGTGGGGACTATATGGAGCCTGAGAAGCCAGGCGCCCCGCTTC  
TGCCCCACCTCCCCAGAACAG

>1428

CTTAGTCATTTGTAACCGTGTTAATCCGTTTGACCCTGTGACCGCCTAGCAAACGAACT  
TCTTTCTCCAGGTGCACCTGTGTGAGGTCGACAGCCCTCAAGATCTGGTTAGTCTTGAT  
TTCCCCCTTAATGTGCGTAAGG

>1429

CTCTCTCTCCTCTCCTGGATGGGAATCTGCGAAGCTGCCCCCAGTGACCTTCTGTGCGGT

TCCCTTCTCAGCTACCCAATGCTGCTGCATGTGGCAGCCCAGATCGCCTCCGGCATGCG  
CTATCTGGCCACACTCAACTTT

>1430

AGGAAGGGAGGGGGGTCAACCGTTGCCTGATGTCCCCTGTCTGTTTTTGCTGCCTTCC  
TCTGCATCCCAGGGGAAGTTCACGACTGCGAGTGACGTGTGGGCCTTTGGTGTGACCG  
TGTGGGAGGTGCTGATGCTCTGTA

>1431

TTGGTGGGGAGGTCATGGACACAAATCAGAAAATACAAGAATGGGCCTCCCCATTTCC  
TCCTCTGACTAGGATGGGGACCCAGACACGCCAAAGCCTGTGAGCTTCACAGTGAAG  
GAGACAGTGTGCCCCAGGACGACAC

>1432

TCCCACTGGGATGTGGCTGGGAGGTCATGGCAAATGGTTTCAAGTTTGACCTTGAGCT  
TCTCCTTTCCAGCTGGTGAAGCGGTGTATGGGGACAGTGACCCTCAACCAGGCCAGGG  
GCTCCTTTGACATCAGTTGTGATA

>1433

GGAGGGGTCTTGGATTGACCCTGGGTACATCCCCGACAAGGAACCTGTTTCTTCCTGT  
ACACAACCCAGGATAACAAGAGATTGGCCCTGCTGGGTGATTCTTCCGGAAATCTA  
AAGAGAAGATTGGCAAAGAGTTTA

>1434

TTCCCGCCCGCCTCCGCTCTGCCTCCTGGCCAGCCCTCACCTCTCCGTCTCTCCGTGCC  
TTCCCTCCAGGCCCTTTGGCCACTGCCGCACCCCTGCAGTCCCCTCCTGAAGGC  
GCCCTCCCCGGCTGGCCCCCTTAC

>1435

CTGTCTAGGGGGGAGTGCACCCTCCTTAGGCAGTGGGGTCTGTGCTGACCGCCTGCTG  
ACTGCCTTGCAGGTGAAATTGCCCTGTGGTCCTTGGTGGTCCTGGCCATCGAGCGGTA  
CGTGGTGGTGTGTAAGCCCATGAG

>1436

GCGCTCGGCAGCCACCTTGGCTGTTCCCAAGTCCCTCACAGGCAGGGTCTCCCTACCT  
GCCTGTCCTCAGGTACATCCCCGAGGGCCTGCAGTGCTCGTGTGGAATCGACTACTAC  
ACGCTCAAGCCGGAGGTCAACAAC

>1437

CCCAGCATGCATCTGCGGCTCCTGCTCCCTGGAGGAGCCATGGTCTGGACCCGGGTCC  
CGTGTCTTGCAGGCCGCTGCCCAGCAGCAGGAGTCAGCCACCACACAGAAGGCAGAG  
AAGGAGGTCACCCGCATGGTCATCA

>1438

CTACTAACGTGCCAGTTCCAAGCACACTGTGGGCAGCCCTGGCCCTGACTCAAGCCT  
CTTGCCCTTCCAGTTCCGGAAGTGCATGCTCACCACCATCTGCTGCGGCAAGAACCAC  
TGGGTGACGATGAGGCCTCTGCTA

>1439

GTGACTTTTTCTTGACCATAAATGGAAACTCTGCAACTGATCTTTGTATACCCCATGTGA  
ACTGTTGCAGCACCATCATTTGCATTTGCTCAGTATGTTTCAGGAAGCAACCTTTGAAGAA  
ATGGAAAAGCTGGTGAAAGAC

>1440

TTTTCTCAGTGAGTACAGAAGCTTTACTTTACCATGACTAAAAATTGTCCTTTTCTTCTC

TGTTGTATAGAATAATGTTTTACAGGAAAAAATATGTGCTATGGAGGGGCTGCCACAAA  
AGCATAATTTCTCACACTGCT

>1441

CTTGTCTACATTCATTGCTTCCTGTTTCTTCCCTCACCCGTCTTCTCTCTTTCATTTTTATT  
TTTTATAGCTTTTTATATGAAGTTGCCAGAAGGAACCCATTTGTCTTCGCCCCCTACACTT  
CTAACTGTTGCTGTTCAT

>1442

TATGACTAAAAAATAAGAGAATAGTGAGATTTTGCTATTGTTTCAAAGAATTTTCTCTT  
TCTTCTTCAGGCAATACCTGTCACACAATATTTAAAAGCATTTTCTTCTTATCAAAAACA  
TGTCTGTGGGGCACTTTTGA

>1443

TAGCAAATTACTCCCACTTGTTCTACTTGCTGTTCAAATTATTTTTGTGGTTTATCAATTC  
TCTTTCCAGATATATTGCGATACTCAGTCAAAAATTCCCCAAGATTGAATTTAAGGAGCT  
TATTTCTCTTGTAGAAGAT

>1444

TGCCATCATTCCATAATGGAAGAAAACCCAGCCTGAAAGTAAAATAATCTCTCATTCTT  
ATTTGGTACAGAGCAAGGTTATGAACCATATTTGTTCAAACAAGATTCTATCTCCAGC  
AAAATCAAAGAGTGCTGTGAAA

>1445

TACAAAATAGTGGAATTGGGTTTTTTTGCTCTTTCTCTAATTTCTAATATACAAAATTTTAC  
ACATTGCAGGTTTACTTTTGAATACTCAAGGAGACATCCAGACCTGTCTATACCAGAGC  
TTTAAAGAATTGTTCAAATA

>1446

CACATTGATGTAAAGCTTATGGTTAAATTTTAGATAAAATGTTTGTAACCATGATTATTCT  
TATTTTCAGGAAGACAAATTCAATGAGACAACTGAGAAAAGCCTCAAGATGGTACAAC  
AAGAATGTAAACATTTCCAGA

>1447

TTCAGCAGTAATTCAAGGGAAAAATGGGTATCTGCTTTCATTTCAGAACCAAACAGACAA  
ATGTTCTTTCAGTTACCTCATCAGGCTCACGAAGATAGCTCCCCAACTCTCCACTGAAG  
AACTGGTGTCTCTTGGCGAGAAA

>1448

CTAACCATATTTTGTAGAAATTCCATTCAAGTTTTAAGATCGTATCTCAGTTGCAACTCTT  
GTTGGTACAGGCAGATTTAGTTTTTGGAGAGTTATGTGGAGTAAATGAAAATCGAACTA  
TCAACCCTGCTGTGGACCACT

>1449

AGCATTTTGGAGTAGAGACGCTTCAGAAAGAAAGCGTTAATTAATTTTATTTGACATCT  
TTTGGCCACAGGTTTCTTGTCAACTTAGTGAAGCTGAAGCATGAAGTCACAGATGAAG  
AGCTGCAGTCTTTGTTTACAAAT

>1450

GACTTTCTATCACCCAACCTTTCAACATTTTCATGTTTTTTTGATGCATGAAATACTATCTTC  
TCTTTCCAGGGAAGGCTTCCTATCTGTGTGGTGATGAATCGCATTCCTGAGAACAAAA  
TAAAAGGATTTTCTGTAAC

>1451

TGCAGATTTAAGGTATTTCCACATTTGGGTCTATAATAATAATATTCTGTATAATTTATTTT

TTTTGCAGTGCCATGAGAATGATGAAAGACCATTCTATCAGAAAACAGCTCCATATGTC  
CCAATGTATTATGTGCCAA

>1452

AATAAATATATATCATGAGAACTGTTAACATACTATGAATAAATTTCTAAACTATCATTATT  
TTTTATAGGACTTGCTGAAACCAAATTACTACTTCACACTCTCCTTCAGCCATTGTCTG  
CCTTCAGTCAACAGAAAA

>1453

CGCGAGACTCCCCTTGTCGTCCAATAACCTGCCAGCGCCTGGCTGGTTCGGCATCCCAC  
TTTTCTCCGCAGATCTCCCTAGAGCACGAAATCCTGCTGCACCCGCGCTACTTCGGCCC  
CAACTTGCTCAACACGGTGAAGC

>1454

ACTTTTATTGCAGATGTCTTTAGAGGCTCTTGGACACACAGTGTCTTCTGTTTCTCATC  
CTCCTTGCAGGTATGGCTTTGTAATTGCTGTCACCACCATTGACAATATTGGTGCTGGTG  
TGATCCAGCCAGGCCGAGGC

>1455

AGTGAAGTGATTGTGATGTAACCTTCTCATAAACTGAGGAGCATCTGTACACTGTTCCCT  
CCTCTCCTCAGGATATTGTGATTGAGCAGGACGATGAGATCCGCTTAAAGATTGTGGGG  
ACCCGTGTGGACAAGAATGACA

>1456

GATGAGGAGTACATGGTTGTGGCTACCCTAAATTCCGGTTCTAACTGATATGCTTTTTCT  
GGTTTCGCAGGGCTTGTAAGCTGAGCCTGGTGGCCTCCTACCCTTGGTCTACTCTAGG  
AAGTGTGATTGTCACACTTAT

>1457

GGCAGTCCCCACCTTGGCCAGCGAGGTCGTGCCCTCAGCCTGCTACCCCCCATCTCC  
CTCCCTCTCCAGGCACCACCTGGGTGAGCCAGATTCTGGACATGATCTACCAGGGTGG  
TGACCTGGAGAAGTGTACCGAGC

>1458

GTGCAAGGGGAGTGAGGAAGACAGGGCTGGGGCTTCAGCTCACCAGACCTTCCCTG  
ACCCACTGCTCAGGGATGGAGACTCTGAAAGACACACCGGCCCCACGACTCCTGAAG  
ACACACCTGCCCCCTGGCTCTGCTCCC

>1459

CCAAGAGATGAGCTGGCCTGGGGCAGGCTGTGTGGTGATGGTGCTGGGGTTGAGTCTT  
CTGCCCCCTGCAGGTGGTCTATGTTGCCCGCAAACGCAAAGGATGTGGCAGTTTCTACTA  
CCACTTCTACCACATGGCCAAGG

>1460

TGTGGAGCCGAGGGGTGGTGGCTACAACGCACAGCAACCCTGTGTTGGCACCCCTTG  
CCTGCTTCTCCAGTGTCTACGGATCCTGGTACCAGCACGTGCAGGAGTGGTGGGAGC  
TGAGCCGCACCCACCCTGTTCTCTA

>1461

GAAGGGGACCCCTTTTACTTTTCCTGAATCAGCAATCCGAGCCTCCACTGAGGAGCCC  
TCTGCTGCTCAGAACCCCAAAGGGAGATTCAAAGATCCTGGAGTTTGTGGGGCACT  
CCCTGCCAGAGGAGACCGTGGACT

>1462

CCTCCCCATAGGCACTCGGGGCCTCCCCTGGGATGAGACTCCAGCCTTGCTCCCTGCCT

TCCCCCCCCAGGCATGGCTGGGGACTGGAAGACCACCTTCACCGTGGCGCAGAATGA  
GCGCTTCGATGCGGACTATGCGGA

>1463

TCTGTTTGCCACTCTGCCAGCCAGGCTGGTGGGGCTCTGTCTAGCCCATTATTCTCACA  
TTTCACCACAGGTCTGGTTACAGGATGGTCACTGGCCTTCCTGGCCTTTGAGCGCTACA  
TTGTCATCTGTAAGCCCTTCGG

>1464

AATCCAGGCATCTCAGCTCCCACCGCACTCTTGTGGAGAGTCCAGTGAGCAAGTGTTT  
GGTCCTTTGCAGGTTTCATCCCTGAGGGCCTGCAGTGTTCTGTGGCCCTGACTGGTAC  
ACCGTGGGCACCAAATACCGCAGC

>1465

AAAAAAAAAAAAAAAAAGCATCCAGAGGGACAGGAAAAAGAGAGATGTGATGCTTTCC  
GTGCTCCACCCAGGTTGCAGCTCAGCAGCAGGAGTCAGCTACGACCCAGAAGGCTG  
AACGGGAGGTGAGCCGCATGGTGGTTG

>1466

GAGAATAAGGTCTTTTTTCCCATACTTCCTCATCTGCCAAGGTTATCTCCAATTGTACCT  
TTCTCTCCAGTTCCAAGCTTGCATCATGAAGATGGTGTGTGGGAAGGCCATGACAGAT  
GAATCCGACACATGCAGCTCCC

>1467

TTCATTGAGTTTCTTGTACACTGCTTCTCTACCCCAGCTCATATACTCATAACCTTCCCC  
TACCCTCAGGTGTGGGTTTTGCTACCAGGCAGGTGGCCAGCATGACCAAGCCTACCAC  
AATCATCGAAAAGAATGGGGA

>1468

GTCCAGACCCACCCCTGCCCCCTCAATTCCTGACTAAGATCACAGCTCAGGCCTCTACCC  
TCTTTCCACAGTCCATTGTGACACTGGATGGAGGGAACTTGTTACCTGCAGAAATG  
GGACGGGCAAGAGACCACACTTG

>1469

AGGGAGGGTAGAATGCTCGCAATGGTGTTCCTGGCTCCCACCCCCCATCTCACTCTGTC  
TTTCCTTCCAGACACTCACCCACGGCACTGCAGTTTGCACCTCGCACTTACGAGAAAGA  
GGCATGACCTGACTGCACTGTTG

>1470

GATCCCTCCCCTCCCATCTCTGGGGCTTCGGGTGTCCAGACCTGACTCCCGCTCCCC  
TCTCCCCCAGCCTACTTCTCCCTGCAGGTGATCTCGGCGCGCAGGGCCTTCCGCGTGT  
CGCCGCGCTCACCACCGGCC

>1471

GCGAGCCCCAGGCGGGTCCGGGTGCGAGGACCATCCCGGCCGGCGCGCTCATCCCAC  
CCGCCCACCGCAGGGTGAAGTGCAGCGAGTACTTCCCGCTGTTCTCGCCACGCTCTG  
GGTCGCCGGCATCTTCTTTCATGAA

>1472

CAGGGGCGCACGCGCTGGACCCCCGGGACCCGCGCAGGGCGCTCACCAGGCCCCGTGC  
GTACCTCTCGCAGGGGCGGCGGCCCTGTGCGGCCTGGTCTACCTGTTGCGCGCCTCC  
GCTACTTCCAGGGCTACGCGCGCTC

>1473

CCTGTGTGTAAACATCAATGTGAAGTTATTTCCAGGAAGAAGTTTCACCTGTGATTC

CTCTTCCCCAGAGCCCCACAGTCTTCGTTACAACCTCATGGTGCTGTCCCAGGATGGAT  
CTGTGCAGTCAGGGTTTCTCGC

>1474

GCTGAGTTCCTCACTTGGGTGGAAAGGTGATGGGTTCGGGAATGGAGAAGTCACTGCT  
GGGTGGGGGCAGGCTTGCATTCCCTCCAGGAGATTAGGGTCTGTGAGATCCATGAAGA  
CAGCAGCACCAGGGGCTCCCGGCA

>1475

AGCAGCCCTGTTCCCTGCATCTCCCTTAGAGGGGAGCAGGGCTTCACTGGCTCTGCCC  
TTTCTTCTCCAGTGCCCCCATGGTGAATGTCACCTGCAGCGAGGTCTCAGAGGGCAA  
CATCACCGTGACATGCAGGGCTTC

>1476

AGGCCAGGGTAGGAACAGCAGGGACGGCTGTGGCTCTCTGCCCAGTGTATAACAAGT  
CCCTTTTTTTCAGGGAAGGCGCTGGTGCTTCAGAGTCAACGGACAGACTTTCCATATGT  
TTCTGCTGCTATGCCATGTTTTGT

>1477

AGAAAAGTCCTTAGGGAATAAACACAACACTGCACCCAGTGGAGCATTTACCCGTTTC  
CCTCTTCTCCAGAGCTTGTGAGCCTGCAGGTCTTGATCAACACCCAGTTGGGACAGG  
AGACCACAGGGATGCAGCACAGCT

>1478

GTGGGGGTGCATGGTCTTGGGGAGGAGTGAGGCACCAACCCCGGGCCCCCGTAACCAG  
TGTGTCTCTCCAGAGCAGGACAGGCTGCTTTGGTTTGTGACCTCCAGGCAGGACGGCC  
ATCCTCTCCAGAATGAAGATCTTCT

>1479

AATGTCCACTGGGGTCAGGCCTGGGAGGGACACTGGAGGCTTCCCTGAACAGGTGTG  
TCCTCCTTCGCAGCCAGCTCGCTGATGTGCTTCTCCTGCTTGAACCAGAAGAGCAATCT  
GTA CTGCCTGAAGCCGACCATCTG

>1480

CTCAGCAGAGGCCATTGCTGTCTGTCTGCAGCCGTCTGTCTCTCCCCTGACAGCCTCAT  
TTCCCATGCAGGGAATCTCGTGACATTTGGCCACAGCCTGAGCAAGACCTGTTCCCCG  
GCCTGCCCCATCCCAGAAGGCGT

>1481

CCCTACCCTGCCCACCTGTTACAGGCCCGCCGCCCCAGGACCGCCGCGCTCACCCCG  
CTCCGTCCGCAGCTCGTACCTGGCGTCTGCTGACCTTCGTGCTGGCGCTGCCAGCGT  
GGCCCTCTGCACCTTCAACTCCTA

>1482

GGCGCGGGGGCGGGGCGCGGACTCCGGACTCACGGCTCACGCGAGCTCCCTCCCCC  
GCTCTCTCCACAGCCCTACCCCTGGGGGGACGGCAACCACACTCTGTTCCACAATAGC  
CACGTGAACCCTCTGCCCACGGGCT

>1483

TATAATTTGGGTTCACCTGTGGCTACTTGAACACTACACTGCAGCTAACTCTATCTTTGTT  
TCCTTTCCAGGAATCAATGAATTTTCAGCGATGTTTTCGACTCCAGTGAAGATTATTTTGT  
GTCAGTCAATACTTCATATT

>1484

GATGCTGGCACTCCTGAAGGGCACAGATGGGGTGACTCAGGAGGGACCTGATGGGAC

CATCCCCCTGTAGGCATCCTGCCTGTGTACCACTCCCTCTTTGCTCTGGCCACGGAGGA  
CCTGTCCTGCTGGTTCCCCCGAG

>1485

CCACCATAATGTCACTCCTACTGAGGGTGGGTGCACTTTTCATCCCAGGGTTCTCTCC  
TCTCCTCACAGCTCTTTTTACTTCCCCAATTGGTTTGGGCTGGAGAAGTGCCACCGCTT  
CGGGCTACGCAAGGATTTGGCC

>1486

GGTCTGCAGGTTAACAACAGGGCTTGAAGTTGGGTGGCCTCAGCTGATGCTCCCTGTG  
GCGGCCCCCAGCACCGCAGTGACCTGGTGAGTGGGCGCCTCCCCGTGGGCCTCAGT  
CTCAAGGAGCAGGGTGAGTGTCTCA

>1487

TTTGTGTGTGTACCCCGCGGGGACCCCTCCCGACGCTGAGGACCGGGTCCCTCCCCTC  
CAACCCCTGCAGCTACAAGGCCTGCCTACCCCCAAGCCTGCGCGACCTGATCCAGGGC  
CTGAGCTTCGTGACGCGGAGGGCT

>1488

TCAGCCTTACCCCGAAGGGCGGGACCGGCACCCTCGGGTTTCACTGGGCTCTGACGCT  
TGTCCTTCGAGAGGGCCGAGTTCCCAGGGCTGCCCAGGGCTCTGTCTCGTTCTGGCGCT  
CGTGGACGGCTACTTCCGGCTGAC

>1489

AAAAGGAAGAAGGACTGAGAAGGAGAGTGTCTGTCGCTCAGTCCCCTCAGGGGCC  
ACTCTTCTTTGCAGAACCCCTTGGTCCTGATTATAAGGGCTGCCTCATCCGGCGCAGC  
CCCACAGGAACCTTCTTCTGGTTG

>1490

TGAGTTAGCTAACCCTTGGGGACTTTTCACCTCTGATTCTGGTTTCTCCCTCATCCT  
CTCCCCATAGAAAAGTCCAACCTGATCGTGGTCCAGAGAGGTCACAGCCCACCCACAT  
CATCCTTGGTTCAGCCCCAATC

>1491

TGTCTCGCTTGGGCTGGGATCCTGCAGGAACCCCTCACTGGCCTCTTCTGCTGTCCCC  
TCACCATTACGCATGAGAACCTGGGCCATGGGTCTTCACCAAGATTTACCGGGGCTG  
TCGCCATGAGGTGGTGGATGGGG

>1492

GAGCACAAAATTTGGGATTATTGGAGTGGAAGAAACCCACGCATCTTCTCTCCCTTCCC  
ACCTTCCCCAGTCATTCCCTGGAAGCAGCGAGCTTGATGAGCCAAGTGTCGTACCGGCA  
TCTCGTGCTGCTCCACGGCGTGT

>1493

GATGCCCCCAGATATATTTTCGGGAGTGCGCAAAGAACTAACTTGGAATACTGAGCAA  
ATATGGGCTGAGCACCATGGTGCAGGAATTTGTACACCTGGGGGCCATAGACATGTATC  
TGCGAAAACGTGGCCACCTGGTG

>1494

AGGAGTTTGCCAAACAGACTCTTCATTTTATCAAACCTCCCGGGCATTTTCGTGTGTTT  
GGCCCCCTTAGGAGGACAAAGGCCTGCCCCATGGCAATGTCTCTGCCCCGAAGGTGCT  
CCTGGCTCGGGAGGGGGCTGATG

>1495

TGGAGGTGGAGGAGGGAGGGGCTGAACAGGGCAAGGAAGTGATCCCTGATCCCCT



TTCATTCCCTCAGATGCTCACCGACAGGATCCCCTGGGTGGCCCCCGAGTGTCTCCGG  
GAGGCGCAGACACTTAGCTTGGAAG

>1496

ACATCCAGTCTGGGGAGATTGGGGTGGGTCTATTGGGTTGGGGATTACCGACTGCTCCT  
CTCACCTCAGAACTCCAATTTTATGAGGACCGGCAGCAGCTGCCGGCCCCCAAGTG  
GACAGAGCTGGCCCTGCTGATTC

>1497

CAGGGCCAGGGTGGGTGGAGAGGACAGGGCAGCATCCAGGTACCTGGACATCAGTGC  
CGCTATCCTCGAGGGCAACTTTGGCAGCGTGGAGCTGTGCCGCTATGACCCGCTAGGC  
GACAATACAGGTGCCCTGGTGGCCG

>1498

GGTCACGCTTGGGGGTACCTGCCGGATTATCCTGGGATCCTCTCTTCAAGATCACAACG  
ACCCCCCCCAGGGCATGGAGTACCTGGGCTCCCGCCGCTGCGTGCACCGCGACCTGGC  
CGCCCGAAACATCCTCGTGGAGA

>1499

AGAGAGCGGGGTCCCACTTCAGGACACCCCTCCAGGTGCCTCCAATACCCGCCCCACCT  
CCCACCCCGCAGGTGTCCAGGCGCTGATCCGCTCCTTCAGCTCCACCGCCCGGAACC  
GCTTTCAGAACCGAGTGCGCGAGA

>1500

GCCGGGGCAGGCGGGGCGCGCTCTAAGGAGCAGCCAGCACCCCTTTCTCATCAGACA  
CCCCACATCCAGGAGGACAATGACATCCCGTTGTACCTGAAGGGCGGCATCGTTGAC  
AACATCCTGTACCGAGTGACAATGA

>1501

CTGTCAAAAGCCTGGGATGTCCAGGGAGGGGATTAGGTCTCATTCTGTCTCCAACGCT  
TCCCCTTTCTAGGCACTGTCTACAGCTTGTACTCCCTTGGCTGGGCCTCCTTCCCCAGG  
AATTAAGACCAAGAAGCCTGGGG

>1502

GGGGTGGGAGAGCGGCTGGGGCGCCTCCGTGACTCAGCCCCGGCCTGTCTGGCCCCT  
CCCGTCTCCGCAGTTCTGGGAGGTGATCTCTGATGAACATGCCATCGACTCCGCTGGC  
ACCTACCACGGGGACAGCCACCTGC

>1503

CTGCATTATGGTGGTGACCACTGATGACCGTATACCTGGCCGTCGAGTGACCGGCTGTA  
CTGTCTTACAGGTCAGTGTGGGGCCGGAACAACCTGGGCCAAGGGACGCTACACCGA  
AGGCGCGGAGCTGATGGAGTCAGT

>1504

TGAGGCCTTGAGGGGTGGCCTGGGGACCTTGGACACAACCAGCCTGCCCCTGACCCA  
TCCCTCCCTGCAGCTTGCTCCTGCAACGGCCATGCCC GCCGCTGCCGCTTCAACATGG  
AGCTGTACCGACTGTCCGGCCGCCG

>1505

GCCCTCACCTCTGACTTCCCAGATCCCCAGACAGGCTTCTGACCAGGCCCTTCCCAC  
CTCTGTCTCAGCCTGCGACTGTCACCCGTTGGTGCTGCTGGCAAGACCTGCAACCA  
GACCACAGGCCAGTGTCCCTGCAA

>1506

TGGGGGAGGGGGCTCTGGGAGGAGAGGGTGGGGAAAGGGAGTCTGTGCCAGCCTCC

CACCTTCTACCCAGACTGTGACTCGCACTGCAAACCTGCCCCGTGGCAGCTACCGCATC  
AGCCTAAAGAAGTTCTGCAAGAAGGA

>1507

TCCCCGTGCCTCCCCCTACCGCGGGCAGGCCGCCCTTCTTGACCCCGCCCCCTCTCG  
CTCTCCCCGCAGCGGTGCAGGTGGCGGTGGGTGCGCGCGGCGAGGCGCGCGGCGCGT  
GGACACGCTTCCCGGTGGCGGTGCT

>1508

CACAGTGAACATTTAGAAGCAAACCTTTTGAAGGAGTATTTTCAGCTGCCATTTATGCTT  
CTTACAAATAGAGTTTGAAACAGCTGAGACACTTCTAAATTCAGAAGTTCATATGCTTC  
TGGAACATCGAAAGCAGCAGAA

>1509

GATTACTCTTTGATTTTTGTTGTTTATTTGTTTTTGATTATTTTGATTTTTTTTTTTTCTTT  
TGATTAGCTTGCTACTCCAGAAAAAGCTTCATAAGTTTGAGTTGGCCTGTTTGGCCAAC  
CTTTGCCCAGAGACTGCT

>1510

CACGCCTCAAAGAAGAGTGCGGGGAAATTGCCAGTCGCCAAATCACTCATTTCTTTTC  
ATTTTCTTGCTAGCTTGAGGGACGGTTTGAAGATGAGGAGCTGCAGCAGATTCTTGAT  
GATATCCAGACAAAGCGCAGCTTT

>1511

CTTCTCTGCAGGCCCAGGTGACCCAGGGTTGGAAGTGTCTCATGCTGGATCCCCACTT  
TTCTCTTGAGCAGCCAGACTGCCTTCCGGGTCACTGCCATGGAGGAGCCGCAGTCA  
GATCCTAGCGTCGAGCCCCCTCTG

>1512

GACCTGGAGGGCTGGGGGGCTGGGGGGCTGAGGACCTGGTCCTCTGACTGCTCTTTT  
CACCCATCTACAGTCCCCCTTGCCGTCCCAAGCAATGGATGATTTGATGCTGTCCCCGG  
ACGATATTGAACAATGGTTCCTG

>1513

CGTGTTCCAGTTGCTTTATCTGTTCACTTGTGCCCTGACTTTCAACTCTGTCTCCTTCCT  
CTTCCTACAGTACTCCCCTGCCCTCAACAAGATGTTTTGCCAACTGGCCAAGACCTGCC  
CTGTGCAGCTGTGGGTTGATT

>1514

GGGCTGGAGAGACGACAGGGCTGGTTGCCAGGGTCCCCAGGCCTCTGATTCCTCAC  
TGATTGCTCTTAGGTCTGGCCCCCTCCTCAGCATCTTATCCGAGTGGAAGGAAATTTGCG  
TGTGGAGTATTTGGATGACAGAAA

>1515

GGCCTCCCCTGCTTGCCACAGGTCTCCCCAAGGCGCACTGGCCTCATCTTGGGCCTGT  
GTTATCTCCTAGGTTGGCTCTGACTGTACCACCATCCACTACAACCTACATGTGTAACAG  
TTCCTGCATGGGCGGCATGAACC

>1516

TTTTTTAAATGGGACAGGTAGGACCTGATTTCCCTTACTGCCTCTTGCTTCTCTTTTCTTA  
TCCTGAGTAGTGTAATCTACTGGGACGGAACAGCTTTGAGGTGCGTGTTTGTGCCTG  
TCCTGGGAGAGACCGGCGCACA

>1517

GGTGGAGGAGACCAAGGGTGCAGTTATGCCTCAGATTCACTTTTATCACCTTTCCTTGC

CTCTTTCTAGCACTGCCCAACAACACCAGCTCCTCTCCCCAGCCAAAGAAGAAACCA  
CTGGATGGAGAATATTTACCCCT

>1518

GTAACCTGAACCATCTTTTAACTCAGGTACTGTGTATATACTTACTTCTCCCCCTCCTCT  
GTTGCTGCAGATCCGTGGGCGTGAGCGCTTCGAGATGTTCCGAGAGCTGAATGAGGCC  
TTGGA ACTCAAGGATGCCCAGG

>1519

CAGGGAAAAGGGGCACAGACCCCTCTCACTCATGTGATGTCATCTCTCCTCCCTGCTTCT  
GTCTCCTACAGCCACCTGAAGTCCAAAAAGGGTCAGTCTACCTCCCGCCATAAAAAAC  
TCATGTTCAAGACAGAAGGGCCT

>1520

CCCGGGGCGCGGCGCAGTGGGTGCCGAGCTTGGCCCCAGCCCCGCGCCTCACCGCGC  
CCTCGCTCCGCAGGCGCTCGTCTGGCGTGCCGCTGAGGCTGGGACCGGCGGTGCC  
TTGTCTCTGGGTGCGCCAGCCGGAGG

>1521

CTGTGGGACCCCTCGGGAGCCGGTGGGACGCAGGACCTGGGGCTAGGGCTGAGCATTC  
CCCCATCCCCAGGTCTGGTTCAAGAACCGCCGGGCCAAATGGCGACACCAGAAGCG  
CGCGTCGGCTTCCGCGAGGCTCCTGC

>1522

ATGACCACGTTGGAAATTCTGGAACCTGGAATCTGCTGTATTCTAACATTGGCAACTTT  
TTTTAAACAGCTGTTGTTGGCCTACTGTACCCCTGTATCGACAGTCACCTCGGAGAAC  
CCCACAAATTTAAGAGAGAATG

>1523

CCCTTGTTGGTTTTACGTTTTTTTATCTTAATAAGAGTCACCGAACTTTTCCTTAACTTTTA  
TATCACCAGAAATTGGATTTTGCCAATAATGTCCAGCTGTCCTTGACTTTAGCAGCCCTA  
TCTTTGGGCCTTTGGTGGA

>1524

GAGAATCTGTGATGTAGAATTGAGCCAGGTGAAATTGACTGCTAAGGTACAGTTTCTTT  
TCTCGCTCCAGGTATACGTCCCCAGATTTCTCTATATTCGTTCTTGGCTCCCTTGTATAT  
TTTTCTCAGGAGGCGTCACG

>1525

TGGTAATTAAAATATTTATACATTTAGTGCTAATTTCTCTTTTCTTTTCTTTTCTTTCT  
ACACATAGGGTGTTCCCTGAAAAGCCCCATAGTGATTGAGTCTTCAAACCCACCGATTCT  
GAGAGCAAGGAAGATTTTG

>1526

TTCAGATTTTCTTATTCCCAAGGCCTTTAAACTGTTACCTCACTGAAACCTTTGTGTTT  
TTGTCCTTAGTGATATTGACCAGAGTTTCGACAAAGTAGCTGAACGTGTCTTAATGAGA  
CTACAAGAGAACTGAAAGGA

>1527

AGCATTTAATTCTAAGTGATTTCCCATGACTTACAGTTTTCTGTTTTTTTTCCCCTTTTC  
TCTATTTAGGTTACCTACATCTCATACTTGCTTTAATGTGCTTTTACTTCCGGAATACTCA  
AGCAAAGAAAACTTAAA

>1528

GCTTCTCAAAGTGCTGGGATTACAGGTGTGAGCCATCGCGCCCGGCCAATTGTTGCTTC

TTTTTCAACAGGAGTGTGGGCTGCTGCTCTCCTCTGAGGGCGAGTGTTCAGGGCTGCTA  
CCCGCTGGATGGGCACATCTTGT

>1529

AGGGCTCTGGCGGGGGCGGCCTCCAGGTTCTGCTCCCCAGCCCTGGTCCGACGGTG  
CGCTTCTCCCCAGCCCTACAGACGCTGCGCGGCTGGGACTCTGTGGACAGGGAGGTG  
GCCGAGATCCGGCAGGAGGATGAGGC

>1530

GCCGGGCGTGGGTCTTGCGCCGAGGCCGCCTCCTCCGGGCAGCCGCCAGCCCCGC  
GCTTGCTTGCAGATCTACTACTACGCGGACCAGATCTACCTGAGCGCCGGCGTGCCG  
GAGGAGCACGTGCAGTACGTGACGG

>1531

CCCCATTGGAGGGGGCTGGAGGGAGGTGAAGCTGGGCCTCTCCCGCCTGAGCCCTGC  
CACCTCCTGTAGGTGTTCTGTTGGAGCTCCTGGGTCCGAGGCTGCTGCTGCTGCTG  
GGCTTCTCCATCTGCCTCATAGCCT

>1532

GGCCGCCCCCTGGGGTCCCCGTCCTACGCTTTGTCTGCTCCAGGTGAACCAACTGCTT  
TCTCTCCGACAGGACACAGTGTCTGGATGCCATACATCAGCATCGTCTGTGTCATCTC  
CTACGTCATAGGACATGCCCTCG

>1533

TCTGCATGGCCAGGCCTGGGATGCTCGGGCCCGCTCTGCCTTCAGGGAGGCTGCTCTC  
CTCCCCCTACAGGTCCCATACCCGCGCTGCTCATCACTGAGATCTTCCTGCAGTCCTCT  
CGGCCATCTGCCTTCATGGTGGG

>1534

CCCCATGCAGTACAGTGCAGAGCCCCTGGGCAAACCACGTCCCACAGTGTACCTGCCC  
CTCTTCCCGTAGGAGGGCCTCGGCCCCGTACAGCTTCATTGTCTTCGCCGTGATCTGCCT  
CCTCACCACCATCTACATCTTCT

>1535

GGGAGAGAAGGGAAAAGCCCTTGGAGGGCCAGAAGAGAAGTCAGATCTTCCTCCTCTC  
CCAAAACCTCCAGTGTATGCCACGTTGAGGGACCTGAAAACACAGGGCCGGCTGTGG  
GAGGCGGCCCGGGCCCTGGCATGCCC

>1536

TGGAGCATGAGGGGACAGGCCGTGCTGAGGGTGATGCTGAGGCGGGCTGGTTGGGCC  
TCTGTCCCCGCAGTGTGTAACACAGGCCTGGGCCTGCTGGGGCCGCTGGGGGAGGAC  
GCCGTGGCCTCTGTACTGGATGTGAA

>1537

GAGGGGCACTGCCTGCCGGGGGATGACCCCCTGGCCGCTGCGCCTCAGGAACCTCAT  
CTTCCCACCCAAGGGCTGCCTTTCAATGACGTTTATTGCGCCAGCAAGTTCGCGCTCGA  
AGGCTTATGCGAGAGTCTGGCGGT

>1538

CTGGGGCAGGAGATGGGACTTGGGCCTGGGTGCGTCCGTCCCTGCCCACTTGCGGCTC  
TCGGGCCAGCAGCGTGAGCCTGATCGAGTGCGGCCCTGTGGACACCGCCTTCATGCAG  
AAGGTGTTGGGCGGTCCCGACCAG

>1539

TTTCCCTTTGCTGGATCTTGCTGCCCCTCTGAGTTTCCTCTTTTTTGATCTGACCCCTGC

TGTCTCCTAGCTGTCGCCATTCCCCTTTGACCTCCTGCTGAAGGAGGTGCAGAAGTACC  
CCAATGCTGAGCTGGCCTGGT

>1540

TCAATCCCTGATCACTGGGAGTCATCATGTGCCTTGACTCGGGCCTGGCCCCCCCATCT  
CTGTCTTGCAGGACAATGCCGTCTTCTGTCTCGTGGGGCATCCTCCTGCTGGCAGGCCT  
GTGCTGCCTGGTCCCTGTCTCC

>1541

TTTCTTATTCTGCTACACTCTTCCAAACCTTCACTCACCCCTGGTGATGCCCACCTTCCC  
CTCTCTCCAGGCAAATGGGAGAGACCCTTTGAAGTCAAGGACACCGAGGAAGAGGAC  
TTCCACGTGGACCAGGTGACCAC

>1542

CACTGTGGTGGGTCCCAGAAGAACAAGAGGAATGCTGTGCCATGCCTTGAATTTCTTT  
TCTGCACGACAGGTCTGCCAGCTTACATTTACCCAAACTGTCCATTACTGGAACCTATG  
ATCTGAAGAGCGTCCTGGGTCAA

>1543

GTGTCCACGTGAGCCTTGCTCGAGGCCTGGGATCAGCCTTACAACGTGTCTCTGCTTCT  
CTCCCCTCCAGGCCGTGCATAAGGCTGTGCTGACCATCGACGAGAAAGGGACTGAAG  
CTGCTGGGGCCATGTTTTTAGAGG

>1544

GCACAGGAGCCTCCCGGTTTCCGGGGTGGGCTGCGCCCGTGCTCAGGGCTTCTTGTCC  
TTTCCTTCCCAGGGCGTGATGGTGGGCATGGGTCAGAAGGATTCTATGTGGGCGACG  
AGGCCCAGAGCAAGAGAGGCATCC

>1545

ATGTCCCCGTCTGGCCTGGCTGTCCCCAGTGGCTTCCCCAGTGTGACATGGTGCATCT  
CTGCCTTACAGATCATGTTTGAGACCTTCAACACCCCAGCCATGTACGTTGCTATCCAG  
GCTGTGCTATCCCTGTACGCCT

>1546

TGCCTGACATGAGGGTTACCCCTCGGGGCTGTGCTGTGGAAGCTAAGTCCTGCCCTCA  
TTTCCCTCTCAGGCATGGAGTCCTGTGGCATCCACGAACTACCTTCAACTCCATCATG  
AAGTGTGACGTGGACATCCGCAA

>1547

GTGGGGTCCTGTGGTGTGTGGGGAGCTGTCACATCCAGGGTCCTCACTGCCTGTCCCC  
TTCCCTCCTCAGATCATTGCTCCTCCTGAGCGCAAGTACTCCGTGTGGATCGGCGGCTC  
CATCCTGGCCTCGCTGTCCACCT

>1548

GGGCTCCTGGGTTCTGCGTTGCGGGGTGGGTTTCGGTGTGCGCGGCGAGGCTGACGGAT  
CGTCCCCTGCAGGGCGTCATGGTGGGCATGGGCCAGAAGGACTCCTACGTGGGCGAC  
GAGGCCAGAGCAAGCGTGGCATCC

>1549

TTGTGGCGTGTGAGCATGGGGTGGCCGTGGGTCTCTGTCCCTGACTAAGCCGCCCCCTT  
GTCCCTTCTCAGATTATGTTTGAGACCTTCAACACCCCGGCCATGTACGTGGCCATCCA  
GGCCGTGCTGTCCCTCTACGCCT

>1550

GTGAGCTAAAGGTTTCTACTCTTTCATCCTCGGTGACACAGCATCACTAAGGGAGGGC

TCTGTCCCCTAGGTATGGAATCTTGCGGCATCCACGAGACCACCTTCAACTCCATCATG  
AAGTGTGACGTGGACATCCGCAA

>1551

TCTGCCTGGCTCGGGAGAGCTGACTGGGGGGCGCTCTGCGAGCTGAAGCCGTGCCTG  
GCTGTCTTTGCAGATCATCGCACCCCCAGAGCGCAAGTACTCAGTGTGGATCGGCGGC  
TCCATCCTGGCCTCACTGTCCACCT

>1552

CCATCCTGGCCTGTCAGGCCTGCCTGGATCCTGCCCCGGGTGGTCCACCACTCACTGT  
TTTGTTCAGGAGGAGAGGGATCGCCCTCCCAGCTAACACAGCAGAGGGGCTGCTG  
AACGTCATTGGCATGGACAAGCCG

>1553

TGTCATTTGCTCCTGGAGCTCCCAAGGGACTTGGGGAAGGTTGTTCCCAACCCCTTTC  
TTCCCTTCCCAGGGGCTGCCGGGAGGCTATCAAAGGATCGCCTATGAGTTTGTAGAG  
ATGAAGGCCAAAGAGGGCGTGGTG

>1554

CCCAGTCCCAGAGCTGCCCTTTAGGCCTTCCTTTTGCCTCAGGCCCATCCCTACTCCTC  
TCCTCACACAGAGGGGACCTCACCCCAGACGAGGTGGTGGCCCTAGTGGGCCAGGGC  
CTGCAGGAGGGGGAGCGAGACTTC

>1555

AGCAGGCAGGTAGGCTGGGAGGTCTCTCCATGGTGCTGGTGACAGAGCCTGGGTGGG  
CATCTGCCACAGACTGGTCCCCCAAGGTGGTGGAGCTGTGTAAGAAGTACCAGCAG  
CAGACCGTGGTAGCCATTGACCTGGC

>1556

CAGCATGGTCAAGGCAGGCTGCCGGGGCCCTCCCGCTAGGGCACCCATGACCTGGCTC  
TCCCCCTTCCAGGAGGCTGTGAAGAGCGGCATTCACCGTACTGTCCACGCCGGGGAGG  
TGGGCTCGGCCGAAGTAGTAAAG

>1557

GCCTGGGCTGGCCATGGGGTCCCTCCTCACTGCCTCCTCCCATACTTGGCTCTATTCTG  
CTTCTCTACAGGCTGTGGACATACTCAAGACAGAGCGGCTGGGACACGGCTACCACAC  
CCTGGAAGACCAGGCCCTTTATA

>1558

CGTCAATGTGTTCTGACTATTTATGTAAGAGTAAAAGGAGGCTGATTCTCTCCTCCTCC  
CTCTTCTGCAGGCTCAAAAATGACCAGGCTAACTACTCGCTCAACACAGATGACCCGC  
TCATCTTCAAGTCCACCCTGGAC

>1559

TCACTACATTGCTAAGAGCTGCCTTCTTTGTTCTCTGGTTCCATGTTGTCTGCCATTCTG  
GCCTTTCCAGAACATCAATGCGGCCAAATCTAGTTTCCTCCCAGAAGATGAAAAGAGG  
GAGCTTCTCGACCTGCTCTATA

>1560

AGTCGAAAAACACAATTTTAGTTGTCTTAAAGGTATCATTTAAAACTTAGTATGTTGCTT  
CCTTTTACAGCATTGCAACTGTTGTAAAGATTTAATTCAAAAAGAGAAAATAATGTCCAT  
CCTGTCTGATGTGATAGGAG

>1561

AACTATACTTGAGAAAAATAAGCTTGCTGCAGGTCTGTTTCCTTAAGGATTCACACGTAT

TTTTGTTTCAGGGCTACCATATTTTTTGCCCAGTTTGTTC AAGAAGCCACTTACAAGGA  
AGTAAGCAAAATGGTGAAAGAT

>1562

TTTCATGTGTCTTATAGATTTTTTAAAGCAAAGTTAGTTGTCTTTCTCCAAACATAAAATA  
TTTCTTATAGCTACCTGCCTTTCTGGAAGAACTTTGCCATGAGAAAGAAATTTTGAGGA  
AGTACGGACATTCAGACTGCT

>1563

TCCAGTTCCAAGCAGTAGTAGTCCTATTTTTAGGTGTTTATAAATCTTCTAGCTCTATTTT  
ATTTACAGATTCAATTTATGAGATAGCAAGAAGGCATCCCTTCCTGTATGCACCTACAAT  
TCTTCTTTGGGCTGCTCGC

>1564

CTAAATATTAGAGCTTGTAAGAAAAATGTTAGTATATGCTTTCATGACATTTTGTTTCCTC  
TACATCTAGGCAGCAACAGTTACAAAAGAATTAAGAGAAAGCAGCTTGTTAAATCAAC  
ATGCATGTGCAGTAATGAAAA

>1565

ACTCTATAAATTCTATTTTATTTTGACAGATAACCAAGAAATTAATTTCTAATTTCTTTTTT  
TTCCCTAGAACTGTTACTAAACTGAGTCAGAAAGTTTACCAAAGTTAATTTTACTGAAAT  
CCAGAAACTAGTCCTGGAT

>1566

AAAGCTGGCTTTGAGATCCTTTATTAAAGAATAAATCTTTAAAACTTATACTTTATTTTCC  
CTGTTGCAGGAAAAAATCATGTCCTACATATGTTCTCAACAAGACACTCTGTCAAACA  
AAATAACAGAATGCTGCAAAC

>1567

CTGGAGAAGTGATGGCTCCTTTTGTCTCTTAGTTCCAATAACTTGAAATATTTTCTCCA  
CATATTTCAAGTTTGTTCATGAATATTCAAGAAGACATCCTCAGCTTGCTGTCTCAGTAA  
TTCTAAGAGTTGCTAAAGGA

>1568

ATCAATTTTATATACAAAGTTATGCATCCAAGAAAAAGAAAAATGTATATGTAATAATTCTT  
CATTTTCAGGAAGAAGAATTACAGAAATACATCCAGGAGAGCCAAGCATTGGCAAAGC  
GAAGCTGCGGCCTCTTCCAGA

>1569

GAGAAGAAGCAAGGCGGCTAAAAACTCATGAATGACTCAGCAGGACTTAGTTAAAAA  
ATGCTTCTTTCAAGTTTCTCGTTGCTTACACAAAGAAAGCCCCCAGCTGACCTCGTCG  
GAGCTGATGGCCATCACCAGAAAA

>1570

CTGAAAAACTGAACCAACTTTGTGACTAATGCCCAATCTCCTTACTTTTTTTTCTCATTC  
TCCTAACCAGGCTGACATTATTATCGGACACTTATGTATCAGACATGAAATGACTCCAGT  
AAACCCTGGTGTTGGCCAGT

>1571

TAGGAAGGCTGTAGAAAAATAGCATTGCATAACAGACTTCTCTTGATTTTGTGTTTGTGTT  
TAAATCACAGGTTTCTCATTAACCTTGTGAAGCAAAAGCCACAAATAACAGAGGAACA  
ACTTGAGGCTGTCATTGCAGAT

>1572

TAATAGAACCAGTTACTTACTGCACCTATTAGTTTAATTAGTATTTAATATATTTTTTGCTCA

TATTGCAGGGGAAGAGAAGACAAAACGAGTCTTTCATTTCGGTGTGAACTTTTCTCTTT  
AATTTTAACTGATTTAACAC

>1573

GGGGTGGGATGAGGGCTGGAGCTGTGGGGGCAACTGATAGTCACCATCCCCCTCCGTCC  
GTTGCCCCGGTAGTGCTCTTGCTGGGACATGTGGCCCAGGTGCTGATGCTGGACAATGG  
GCTCCTGCAGACACCACCCATGGG

>1574

AGCTGAGGCAGGGTGTGGGTGAGGGCCGGGCTGGGTCCCTGAGCTACCCCATCCCTCT  
GCCCCTCACTAGTGAACAGCTCTTCATGGAGATGGCTGACCGGATGGCACAGGATGGA  
TGGCGGGACATGGGCTACACATAC

>1575

GGTCAGATATGCCTTGAGGAGGCTCCTTGAGGGTCCTGCTTGAGCCCACTGTGTCCTC  
AAACCCCCACAGGTTCACTCCCTGGGCCTGAAGTTGGGTATCTACGCGGACATGGGCA  
ACTTCACCTGCATGGGTTACCCAG

>1576

AAAGGTCTGCTAAGGCCCCAGACTGCCTCCTGCACTTCCTCAGGACTGAAACAGGTTG  
GGCTTTCTCTAGGGTACCCCAAGATGGCTGCTGCCCTGAATGCCACAGGCCGCCCAT  
CGCCTTCTCCTGCAGCTGGCCAGC

>1577

CTCCTGTGTGGGTCCCTGGGCTGCAGCGTGTGATTCTGGTGCTGGACTCTGCCTTTCCC  
TCGACATCCAGGTGAACTACAGTCTGCTGGCGGACATCTGCAACCTCTGGCGTAACTAT  
GATGACATCCAGGACTCCTGGT

>1578

TTTGGGGATGGTCCCTGTGTCTACCTCCTTGAGGAGATGAGAGCTGACTACTCCTCTTC  
TCTGCCCCCAGCTGCTCATTGGGAACTTTGGTCTCAGCTTAGAGCAATCCCGGGCCCA  
GATGGCCCTGTGGACGGTGCTGG

>1579

GGGCCAGGGAGGCAATGGTAGGTCTGTCTGAGCAAGGGACCCCAGCCAGTAGCCAC  
CTTCTGTGCCCAGGAAAAATCTCTCATCGAAGTGTACATGCGGCCTCTGTCCAACAAG  
GCTAGCGCCTTAGTCTTCTTCAGCT

>1580

ATCCTCTAGCGGGGGGGGTCTCTGTGCCCCACTCTCATGGTGGCATTGGTGATGTCCCT  
CCCCACTGCAGGCCAGGACGTCTACTCAGGTGACATCATCAGTGGCCTCCGAGATGA  
AACCAACTTCACAGTGATCATCA

>1581

AGACCCTGGCAGCCCCTGTTCCCTCCTGGGACCCTGTGTCTCGGGGTTTATGAATGGGT  
GGGCGTTTGCAGGTGGGCCTGGCTCAGGGAAGGGCACCCAGTGTGAGAAGATCGTGC  
AGAAGTATGGCTACACCCACCTCTC

>1582

GTGACGAGAGGCTGGGAGAAGGGATGGGGAGGAGAGGCTCATGGCCCCCTTCCTCCTT  
TGCTGTGCCCCAGGAGACAGTGTTGGACATGCTCCGGGATGCCATGGTGGCCAAAGTC  
AATACTTCCAAAGGCTTCCTGATTG

>1583

TGGGAAGATGGGGAGGACATGGCCCTAGGGGGCAGGAATGGGGTCCCTGTGACATGG



TGCCCCGCTGCAGATTGGACAGCCCACACTGCTGCTGTATGTGGACGCAGGCCCTGAG  
ACCATGACCCAGCGGCTCTTGAAAC

>1584

TGGGGCCTGCCATGGTGAGGCCCACCCCACTCCACCTGGTGACTCAGCCTCACGGCCC  
ATCTCCCCACAGGTCAACGCTGAGGGCTCCGTGGACAGTGTCTTCTCCCAGGTCTGCA  
CCCACCTGGACGCCCTAAAGTAGC

>1585

TCCCAGAGTTGAGGGTGGGTGAGACCACGTGCTCATGGCTCTTCTCACTGTGCCCTGC  
CCCCTGCACTAGGCGGTGCCTCGGGAGGAGCTGTTTGTGACATCCAAGCTGTGGAACA  
CCAAGCACCACCCCGAGGATGTGG

>1586

GGCTGGATGGGCAGGTAGGGTAGAAGCCTGGCATTGTGTCCACACTTGGTGGGGCTG  
TCTCTCACTCAGGCGGGGAGACAACCCCTTCCCCAAGAATGCTGATGGGACTATATGCT  
ACGACTCCACCCACTACAAGGAG

>1587

ATGCATGTCTGGATGGGCCAAGCAAGTCTGGGTGTCAACCACTTCATGGTGATGGGTTAT  
CTTTGGCTCAGGTGGAATGCCACCCATACTTGGCTCAAAATGAGCTAATTGCCCACTGC  
CAAGCACGTGGCTTGGAGGTAA

>1588

TGCATGGGGAAACAAAATAGTGCTTATGAATACTGACCCCTTTTCCTCATCTGTCTAATCC  
CCCAACTTAGGTGGCAGGTCCAGCGGAAAGTGATCTGCATCCCCAAAAGTATCACTCC  
TTCTCGAATCCTTCAGAACATC

>1589

AGGCAGTGTTGTGGAACCCAGCTTCTGCTCACAAAGCTGGCTTTCTTGAACCCCACT  
CTCCATCCTCAGGTGTTTGACTTCACCTTTAGCCCAGAAGAGATGAAGCAGCTAAATG  
CCCTGAACAAAAATTGGAGATATA

>1590

GGGAAGATGCCTGGAGTCTTTGGAATGGCAACTCCTGCTGATGGAGTAATCTATCTGTC  
TCTCTTTCCAGGTGGATGGGAAGAGAGTCCCAAGGGATGCAGGGCATCCTCTGTACCC  
CTTTAATGACCCGTA CTGAGACC

>1591

CCGGTGTGCCATGACCCCAGGCCACCCTTTCCTGCCTTTCTACTCATGGCTTCTTCCTG  
ACTGTCCCCAGGAGTTGTGCCCCTGCTGTTGGTTCTGCACTGGAAACATGGGGCGGGG  
AGCCCCCTCCCCATCACCCCTGT

>1592

CCCAAAGGGTTGGCGGCAGGGCTGGGACACTGACCCCTGACTCCCACGTCACCTCCC  
TTCTGCCCCCTCAGTACACAGCCCAGGGGGAGCCGTTCCCCAACACCTGGACAAGCTA  
TGTGGCCCCAACGTGACGGACTTCC

>1593

TACACACACACACACACACACACCACCCCCAGCCCAGGCTGACCTGATCTTTGCTCT  
CCCCCTGGCCAGTTGAGGAGGAGAACCCGGACTTCTGGAACCGCCAGGCAGCCGAGG  
CCCTGGGTGCCGCCAAGAAGCTGCA

>1594

CGGCGCCCGGACCCTCAGTGTTCCAGGACAGCCCTGGGGAGCAAGCCTCACACACT

TCTGCTCCTTCAGGGATGGGGGTGTCTACGGTGACAGCTGCCAGGATCCTAAAAGGGC  
AGAAGAAGGACAAACTGGGGCCTGA

>1595

TCCCAGAGGACAGAGATCAGGGTCTTGTGTTGTCTGCCCCAGAGAAGAGCTCAGAGTG  
TCTCTGTCCCCAGACATACAGTGTAGACAAGCATGTGCCAGACAGTGGAGCCACAGCC  
ACGGCCTACCTGTGCGGGGTCAAGG

>1596

TGGGGCCCCGGCTGTGGGGTCAGGGCCAGTGACAGACCTCTATCGCATATCCTGACCTC  
TATCACCTCAGGAAAGTCAGTGGGAGTGGTAACCACCACACGGGTGCAGCATGCCTC  
GCCAGCCGGCACCTACGCCACAC

>1597

CTCTGCATGAGGAGGGGACACGGGGCCTAGCCATGGCCCAAAGTCCACCTGCCCCATC  
CTCTGTTCCCAGGTGATCCTAGGTGGAGGCCGAAAGTACATGTTTCCCATGGGGACCC  
CAGACCCTGAGTACCCAGATGACT

>1598

CAGCAGGGGGAGGGCAGAGGTGTGGGGCTCGGGGCTGTGGGCTGAGGCCTGGCTCTC  
TCCCTCCCCGCAGGGTGCCCGGTACGTGTGGAACCGCACTGAGCTCCTGCAGGCTTCC  
CTGGACCCGTCTGTGACCCATCTCA

>1599

CTGTGTGCACATCCGCCAGCACCCCTCCCACCCCCAGCCTGCCAGTCACCACAGGACCC  
CTTGTTCCCACAGGTCTCTTTGAGCCTGGAGACATGAAATACGAGATCCACCGAGACTC  
CACACTGGACCCCTCCCTGATGGA

>1600

CCCTGGGAGTGGGGGGTTGGGGGTGAGCAGGGCAGGCTCAGCATCTCCCCCTCT  
GGCCTTCCTGCAGGTGGTCGCATCGACCATGGTCATCATGAAAGCAGGGCTTACCGGG  
CACTGACTGAGACGATCATGTTCA

>1601

TGGCGGGAAGGGGTCACCTCTTGTCTGCCTGGAAGTGAAGTTCTACTGAAAGTGA  
CCCTCCAACCAGGGAGCCCCGAGTATCGGCAGCAGTCAGCAGTGCCCCTGGACGGAG  
AGACCCACGCAGGCGAGGACGTGGC

>1602

CCCAAGCTGTTCCACACACAGGGCACCCCCTCAGCCAGGCTGACCTGATCTCTACTCT  
CCCCCTGGCCAGCTGAGGAGGAGAACCCGGCCTTCTGGAACCGCCAGGCAGCTGAGG  
CCCTGGATGCTGCCAAGAAGCTGCA

>1603

GGCACCCGGGACCTTCAGTGGTTCCAGGACAACCCTGGGGCCCAGGACTCACACATT  
TCTGCTCCTTCAGGGTTGGGGGTGCCACGGTGACAGCCACCAGGATCCTAAAGGGGC  
AGAAGAATGGCAAAGTGGGGCCTGA

>1604

CAGAACCAGGTCCTTGGTTGGGGTCTGGGTGTCCGCCCCGAAGTAGAGCTCAGGGTG  
TCTCCGTTTCGACACATAAATGTGGACAGACAGGTGCCAGACAGCGCAGCCACAGC  
CACGGCCTACCTGTGCGGGGTCAAGG

>1605

TGGGGCCCCGCTGTGGGGTCAGGACCAGGCCCAAGATCTCGGTCACCGATCCTGACCTC

TGTCACCTCAGGAAAGTCAGTAGGAGTGGTGACCACCACACGGGTGCAGCACGCCT  
CGCCAGCCGGCACCTACGCACACAC  
>1606  
GGCTATGCATGAGGAGGGGGCACGGGGCCAGCCAGGCCCCCAAACCACCTGCCCCAT  
CCATTGTCCTCAGGTGATCCTTGGCGGAGGCCGCAAGTACATGTTTCCCATGGGGACCC  
CAGACCCTGAGTACCCAGCTGATG  
>1607  
GGCACGGCAGGGGGAGGCCAAGTGTGTGGGTCTCAGGGCTGTGGGCTGAAGCCTGGC  
TCTGTCCCTGCAGGGTGCCTGGTATGTGTGGAACCGCACTGAGCTCATGCAGGCGTCC  
CTGGACCAGTCTGTGACCCATCTCA  
>1608  
CTGTGTGCCCATTGCCAGCACCTCCCCTCACAGCCTGCCAATCACCACCAAGCTC  
CTTGTCCACAGGCCTCTTTGAGCCCGGAGACACGAAATATGAGATCCACCGAGACCC  
CACACTGGACCCCTCCCTGATGGA  
>1609  
CTGGGGAGTGGAGGAAGGCGGGGCGCGGCAGGGCAGGTTCAAGCATCACCCCCCTCT  
GGCCTTCCTGCAGGCGGCCGCATCGACCATGGTCATCATGAGGGTGTGGCTTACCAGG  
CACTCACTGAGGCGGTCATGTTCTGA  
>1610  
TGCCTGGCACATAGGAGGCACTCCACAGCTGTGGTCAGCTCAACTACAGGGACCCGC  
ATCTCCCTACAGGGTTGGCCCCCAGCAAGGCTCAGGACAGCAAAGCCTACACGTCCAT  
CCTGTACGGCAATGGCCCCGGGCTA  
>1611  
CAGGGATGGGGGCATTTCGCGGGAGGGGGACGCCGCCTGCCTGCCCTGAAGTGCCTC  
ACCCTCCTACCAGGGAGCCCCGATTACCAGCAGCAGGCGGCGGTGCCCCTGTCGTCCG  
AGACCCACGGAGGCGAAGACGTGGC  
>1612  
CCCTACACAACACACACACAGGGCACCCCCCAGCCCAGGCTGACCTGATCTTTGCTCT  
CCCCCTGGCCAGTTGAGGAGGAGAACCCGGACTTCTGGAACCGCGAGGCAGCCGAGG  
CCCTGGGTGCCGCCAAGAAGCTGCA  
>1613  
CGGCGCCCGGACCCTCAGTGGTTCAGGAGAGCCCTGGGGCCCAAGCCTCACACATT  
TCTGTTCTTCAGGGATGGGGGTGTCTACGGTGACAGCTGCCAGGATCCTAAAAGGGC  
AGAAGAAGGACAAACTGGGGCCTGA  
>1614  
GAGGACAGAGATCAGGGTCTGGGTCTCCGTGTCTGCCCCAGAGAAGAGCTCAGAGTG  
TCTCTGTCCCCAGACATAACAATGTAGACAAACATGTGCCAGACAGTGGAGCCACAGCC  
ACGGCCTACCTGTGCGGGGTCAAGG  
>1615  
TGGGGCCCCGCTGCTGGGTACGGCCAGGTCACAGACGTTGGTCACATATACTGACCTC  
TGACACCTTAGGGAAGTCAGTGGGAGTGGTAACCACCACACAGTGCAGCACGCCT  
CGCCAGCCGGCACCTACGCCACAC  
>1616  
GCTGTGCATGAGGAGGGGGCACGGGGCCAGCCAGGGCCCCAAATCCACCTGCCCCAT

CCTCTGTTCCCAGGTGATCCTAGGTGGAGGCCGAAAGTACATGTTTCGCATGGGAACC  
CCAGACCCTGAGTACCCAGATGACT

>1617

CAGCAGGGGGAGGGCAGAGGTGTGGGGCTCAGGGCTGTGGGCTGAGGCCTGGCTCTC  
TCCCTCCCCACAGGGTGCCCGGTACGTGTGGAACCGCACTGAGCTCATGCAGGCTTCC  
CTGGACCCGTCTGTGACCCATCTCA

>1618

CTGTGTGCACATCCGCCAGCACCCGCCACCCCCAGCCTGCCAGTCACCACAGGACCC  
CTTGTCCCACAGGTCTCTTTGAGCCTGGAGACATGAAATACGAGATCCACCGAGACTC  
CACACTGGACCCCTCCCTGATGGA

>1619

CCCTGGGGAGTGGGGGTTGGGGGTTGGAGCAGGGCAGGCTCAGCATCTCCCCCTCT  
GGCCTTCTGTCAGGTGGTTCGATCGACCATGGTCATCATGAAAGCAGGGCTTACCGGG  
CACTGACTGAGACGATCATGTTCTGA

>1620

CGGTGCCTAGCACGTGGGAGACACTCCACAGCTGTGTTTCAGCTCAACCACAGGGACC  
CCTCTCTCTGCAGGGCTGGCCCTGGCAAGGCCCGGACAGGAAGGCCTACACGGTC  
CTCCTATACGGAAACGGTCCAGGCTA

>1621

CGGGAAGGGGTCACCTCCTGTCTGCCTGGAAGTGAATGAACCCTCCTACCGGAACTGA  
ACCCTCCAACAGGGAGCCCCGAGTATCGGCAGCAGTCAGCAGTGCCCCTGGACGAAG  
AGACCCACGCAGGCGAGGACGTGGC

>1622

ATTTTTTCAGGCAGGATGCATATTATTTATTAATTCACTCCTCTTTTTTCTCATTTAATAT  
AACTGCAGGAGCCCCTAATGGAAGAATATGCTATTGCTGCACAAGTCTTCAAGCTGAG  
CACCTGTGATATGTGCGAAG

>1623

AGAATGCAATTATTGTCTATACCAGGGTGAAAAGAGACAACAATCATTCTGCCATCCTT  
TTCTCTTATAGGAGAAAGTAAAGTTTCTGGGCGACAATTACCTTGAGGAAGGCCCTGC  
TGGAAATGATATCCGGAGGACAA

>1624

TGCTCACTCCTCTTGATTTCTCCAAGTCAGTGAGGTTTATCCCTTTCCCTGTATTTCC  
TTTTCTAAAGAATTTGCTGGACCATTTGGAAGAAAAGATGCCTTTAGAAGATGAGGTC  
GTGCCCCCACAAGTGCTCAGTG

>1625

AGATGGCATAAGCTCTTCTTTCCCTTCCCCATGGTTATAACTGTCCCTGTTGGCTTCC  
TTCCTGTCAGGTGCAGCATGCCAGCAAGCAGATCACTGCAGATAAGCAATACAAAGGC  
ATTATAGACTGCGTGGTCCGTA

>1626

TTAGGGGATGTGGGGAAAGGAAGTCAGTAAACTTCTGCTTTTTGGTAAAGATCTCTT  
TCCTATTCTAGGAATGCTTCCGGATCCCAAGAACTCACATCGTCATCAGCTGGATG  
ATCGCACAGACTGTCACTGCTGT

>1627

TTTAGCCTAGTGAATCTTAGGATTTTTTCATCGGCCTTCAGTCACTAACTCCACGTCTTTA

TTCTTTGCAGCTGACATCATGTACACAGGCACGCTTGACTGCTGGCGGAAGATTGCTC  
GTGATGAAGGAGGCAAAGCTTT

>1628

TCTGCCCCACCTCTTGATTGCTTTCCCTTTTCTTATAGTTTTTTATGCTAATTCTGTTTCAT  
TTCTATAGGCGAGGAGGAGCATGATCAGGAAGGCCGGGTGATTGTGGCTGAATTTGAC  
TCGTTTGTGCTGGTAACAGC

>1629

AGCTCAGAGCTGGAGCAGAGGGGCCACACAGGAGACGGGGCCTCATGAATTGCTCTC  
TGTTACCACCCAGGAGCCAGGGCTGAGGTCAGTGCTGACCAGGTGGCCACAGTGATG  
TGGGACTACTTCAGCCAGCTGAGCAA

>1630

ATACAAGCAGACAAAGTCTTGCCGTGTAAATGCCAAATGTAACGTGGCCTCCTTGTGC  
CCTTCCCCACAGTGCCCTCTTCCAGGACAACTTGGAGAAGTGAACACTTACGCAGGT  
GACCTGCAGAAGAAGCTGGTGCCC

>1631

GAGCAAGACTCCATCTCCAAAAAAAAAAAAAAAAAAAAACAAATTTTGAACCCCTGCCC  
ATCTTCCTGGCAGGCCAGCCCCAGCCCAGGGGACCCCAGACGTCTCCAGTGCCCTTGG  
ATAAGCTGAAGGAGTTTGGAAACAC

>1632

CCGTCTCAAACTACAACAACAACAACAACAACCAAATTTTGCACCCCTGCCTCA  
TCTTCCTGGCAGGCCAGCCCCAGCCTAGGGGGCTCCAGAAGTCTCCAACCCCTTTGA  
TGGCCTGGAGGAGTTAGGAAAGAC

>1633

CCCCTAGGTAGCTAGATGCCTGGACGGGGTCAGAAGGACCCTGACCCGACCTTGAACCT  
TGTTCCACACAGGATGCCAGGCCAAGGTGGAGCAAGCGGTGGAGACAGAGCCGGAG  
CCCGAGCTGCGCCAGCAGACCGAGTG

>1634

GCCCCCCCCATCCCAGCCCTTCTCCCCCGCCTCCCCACTGTGCGACACCCTCCCGCCCT  
CTCGGCCGCAGGGCGCTGATGGACGAGACCATGAAGGAGTTGAAGGCCTACAAATCG  
GAACTGGAGGAACAACCTGACCCCG

>1635

GAACCCCTCGTCTTTCGCCCCCGGGCCCTGCTCCTTCGGCCCCGCGTCACCAGGCCTGT  
CCTTGGGTCCAGGGACATCTCGCCCGTCCTGAAGGACCCCGCCTCCTTCCGCGCCGCC  
ATCGGCCTCCTGGCGCGACACCTG

>1636

TTGCCACCGCCGAACCCTGCCCCTGGGGATTCCCATGCTGCCGAGTCACTCCTGTCAC  
TTACCCTGACAGGCCTAGACTCCCGAGGCTTCCTCTTTGGCCCCCTCCCTGGCCCAGGA  
GCTTGGACTGGGCTGCGTGCTCAT

>1637

AGCTGCCAAGCTGTGCAACAAAGCTGTTTTCTGCGGGAGGCTGAGGACCACACACCA  
CTTCCCCTCCAGGCTGAGCTGGAGATTCAGAAAGACGCCCTGGAGCCAGGACAGAG  
GGTGGTCGTCGTGGATGATCTGCTGG

>1638

CAGGGGCTGGCCTGGAGCACCTGCTCTCTGCAGCCCAGGCCAACTGGGGACCTCACC

CTCCCATCCCCAGGAACCATGAACGCTGCCTGTGAGCTGCTGGGCCGCCTGCAGGCTG  
AGGTCCTGGAGTGCGTGAGCCTGGT

>1639

CCTGGCTGAGTGGTGGGAATGGAGGCCCCAGCCCCCTCTCTTCCCTGACTCTCCGGCTC  
TCCCTCCCTCAGGCTGGCCGTGAGTACTCACCTGCCGCCACCACGGCAGAGAATGGGG  
GCGGCAAGAAGAAACAGAAGGAGA

>1640

AGGGATGGGCATGGTGACTGGCTGGGTTGGCTCCGGATGCGTGCCCCCTACGCCTCTCC  
TTGCTCCCTCAGGGCCTCACCAACCAGCGGGCTCAGGACGTTCTGGCTCGAGATGGGC  
CCAACGCCCTCACACCACCTCCCA

>1641

TCCCAAGTGGCAGCTGCCCCCTTTAGGGTTGGGGGGAAGGTCAGGTCCCTGAAACTCTT  
TCTCCTTACCAGCTATATCTGGGTGTGGTGCTGGCAGCTGTGGTCATTGTCACTGGCTG  
CTTCTCCTACTACCAGGAGGCCA

>1642

GGGAGACCAGCAGGAGAAGAAGGCAGGGGCAGAGACAAGCATTTCATGAGCTGCCT  
GTGGCTCCCCACAGCAAGCCCTTGTGATCCGGGAGGGAGAGAAGATGCAGATCAACG  
CAGAGGAAGTGGTGGTGGGAGACCTGG

>1643

G TTCAGGAGACAGCTGTGTGCATACAAGTGGCTCTGCCAGTCTGATGACTATGCACTC  
CTTCCTCCTCAGGTGGATAACTCATCCTTAACAGGAGAGTCGGAGCCCCAGACCCGCT  
CCCCGAGTTCACCCATGAGAACC

>1644

AGGAAATAGGATGGGACTGCAGTCCCTGGGAGCCACAAGGCACCCAACCTGATGCCC  
CACCATGTTGCAGGCACTGCCAGGGGCATTGTGATTGCCACAGGAGACCGGACGGTGA  
TGGGCCGCATAGCTACTCTCGCCTC

>1645

GTCTAGGGTAAGGTTATGGCCATCTCCGGCTTCAGCCTTAACCTTTTTTATTCTCCTCTT  
TCTCTACCAGGTGTGCCTGACCCTGACAGCCAAGCGCATGGCACGGAAGAACTGCCTG  
GTGAAGAACCTGGAGGCGGTGG

>1646

GTGGGGTGAGTGGTTGAGATAAAGGCTCTAAAGGGAGCCACGCTCCTGGTTCCCCCTC  
ATTTCCTCCCAGGGGCCACTTTTGACAAACGATCCCCCTACGTGGACGGCCCTGTCTCG  
AATTGCTGGTCTCTGCAACCGCGC

>1647

TGCCGCCTTCACCTGATCCTCCACTCCCTTCCCTCCCATGCTGACACTGAATTCTTGTCT  
CTTCTGGCAGCGGGACACAGCTGGTGATGCCTCTGAGTCAGCTCTGCTCAAGTGCATT  
GAGCTCTCCTGTGGCTCAGTGA

>1648

CAGCTGCTGCTCTATGCCGCGCTACCAAGACAAGTATGGCCCTCTCTGTAACTACCTGT  
TGTCTCTCCAGCTGTCTATCCACGAGCGAGAAGACAGCCCCCAGAGCCACGTGCTGGT  
GATGAAGGGGGCCCCAGAGCGCA

>1649

GGTGGGGGACTGTGGGGGCGTCCAGGAAGCCACTCTGCGGATCTCACTGATCCCTTCT

GCCCCCTTTAGGATTCTGTCAACTGAATCTGCCATCTGGAAAGTTTCCTCGGGGCTTC  
AAATTCGACACGGATGAGCTGAA

>1650

TTGGGAGAGGAACAGGAGGGGGGATAAACCCCTTAATACTACTTTTCCTGTTGTCTCCTCTC  
CTTCCCCTAGGTGATCATGGTAACCGGGGATCACCCCTATCACAGCCAAGGCCATTGCC  
AAAGGCGTGGGCATCATATCAG

>1651

GAGGCAGGGGGCAGGAGGGGGCTGGTACAGGTGCCAGGGGTCAGCTGTCTCTGTCCCC  
ACCCACCCTCCAGAGAAGCCAAGGCATGCGTGGTGCACGGCTCTGACCTGAAGGACA  
TGACATCGGAGCAGCTCGATGAGATC

>1652

ATGGAGTGAGAGGCGAGGAGCCAGGCTTGGGAAGGGGTTTCGTCCTCAAGTGTGGCC  
GTCTTCCCTCCAGGGAGCCATTGTGGCCGTGACGGGTGACGGGGTGAACGACTCCCCCT  
GCATTGAAGAAGGCTGACATTGGCA

>1653

CATGCTTCAGGGGCTGGGGGTGGGGAAGAGTCCCTCTGACCTCCCTGATGCCCTCAGA  
ATCTCCCCACAGGCCCGCTGATCTTTGACAACCTGAAGAAATCCATCGCCTACACCCTG  
ACCAGCAACATCCCCGAGATCAC

>1654

GATCAATTGCTTCTGTCATCTCCTACGTCCCTTCAAATGCCCTCCCTGCCCCATTTCCTA  
CCCCACACAGGTCCCTGCCATCTCCTTGGCCTATGAGGCAGCTGAGAGTGATATCATGA  
AGCGGCAGCCACGAAACTCCC

>1655

GCCCTGAGGGGCTGTGCCCCCTTCTGCTTCCTGCTCTGACCCTGCCCCTGCCCTTGGCCC  
TCTACCCACAGGGATGATCCAGGCACTGGGTGGCTTCTTCACCTACTTTGTGATCCTGG  
CAGAGAACGGTTTCCTGCCATC

>1656

AACCATGCTACCTTCTGGTCCTACCCTTTTCCTCCGACACTCTCATCTGTCTCTGCCCACC  
CTCCCTCCAGACCTATGAGCAGCGGAAGGTGGTGGAGTTCACGTGCCACACGGCATTC  
TTTGCCAGCATCGTGGTGGTGC

>1657

CCAGGGGTATCCCAGGATCTCTGCCTCCATGATCCCCCTTCACCTGCCACCTCCTTTCTT  
TGCCTTTCAGGAACAAGATCCTGATTTTTGGGCTCCTGGAGGAGACGGCGTTGGCTGC  
CTTCTCTCTTACTGCCCAGGC

>1658

AATGCTCCTTTATGTGACAGCCACCAAGCCAACCTCTGATGCTGCTGACACTCTCCTCC  
ATTGCTTTCAGAGTCACCTGGTGGTCTGCGCCTTCCCCTACAGCCTCCTCATCTTCATC  
TATGATGAGGTCCGAAAGCTC

>1659

CCCTAGGAAATTGATCTCTTGCCTCCTTTTAAGCTCATGCTGCAATCTCCACTCCCAATC  
TCTCTAACAGGCTGGGTGGAGAAGGAGACATACTACTGACCCCATTTGGAAGAAGAAC  
CAGGCATGGAAAGATGGGGAGCT

>1660

ATTTTAGAGGCTCTGTTTACCCACTTCAACAGACTCTCCATTTCTGATGTACTTTTTTCT

ACCTCTACAGGCTGGTGGGATAAGAACATGTATTATTAAGACCACCTCCCTTCCTATGTC  
TCTCAGCAGCACGTTGGGGC

>1661

CCCCGTTCCCTCGTCCACAGCCCCGCCCTGTTCCCCCGTCCACAGCCTCGCCTCTCCCC  
CCCGCCCACAGCTGTCCATACATACGCTGGAGGACCCGCGGGACCCGCGACACTTGCT  
GGTGATGAAGGGCGCCCCCGAGC

>1662

GTCCCTCTCTTCCTGTGTCCCTGTCTCTGTGTCCATCTCTGTCTCCCTGTGTCCCTTGT  
CTCTCTCCAGGTGCCATTTCAGTCCTTTGCTGGCTTCACTGACTACTTCACGGCAATGGC  
CCAGGAGGGCTGGTTCCCACT

>1663

TTTGTTTAAGCTTGTAAGTTTTATAAAGGCTTTGTTAAAAATCAAATTTTAAAGAATACT  
TTTGCCTAGGTCTCCAGAAATGCTTTGGGTTTCATCTTTCATTGCTGCAAGGAACCTCC  
ATGCCTCTAACACTCATCTTC

>1664

GGATTACAGCTGTGAGCCACTGTGCCTGGCCCAGATTATTTTTTTAATTGAATTGAATTG  
TCTTCCATAGGGACTGCTGAGATGTCTCTATTCTTGAAGAGCGTATTCTTGGAGCTGAT  
ACCTCTGTTGATCTTGAAGA

>1665

ATGTAGTATTGGTGTATGGGGAGGAGTGCCCATTCAGCTTCATTGATGTTCAATTGTGTC  
TTTTGTGCAGGGTATGTCCTTGAACCTGGAACCTGACAATGTTGGTGTGTCGTGTTTG  
GAAATGATAAACTAATTAAGG

>1666

ATATAGTTGCAGCTTCTAACAAACATCAAACTGATTATGCTTAGGGTTTTTCTTTTTATT  
TTTTAACAGGGTCCAATTGGTTCCAAGACGCGTAGGCGAGTTGGTCTGAAAGCCCCCG  
GTATCATTCCTCGAATTTTCAG

>1667

TCTCTTTCTTTCCCCACAGGGAAGTCCTTTTAAAGTTTAGGAAGATTTATATTTACTTTCT  
CTTTTTAAAGGAAAACCTCAATTGCTATTGACACAATCATTAACCAGAAACGTTTCAAT  
GATGGATCTGATGAAAAGAAG

>1668

AGGTAATTTTATAGTAGCCTCCAATTTAAAACCACAATATTGATAAAATTGTAAAATATA  
TTTTCTCAGATGCCATGAAGTACACCATTTGTGGTGTCTGGCTACGGCCTCGGATGCTGCC  
CCACTTCAGTACCTGGCTCC

>1669

CTGAAGTAAAAGTTCACATATGCAACTTCTATTTAATAGGTAACTTCACAAACCTATTC  
TGTACCATAGGCTGTTGCTTACCGTCAGATGTCTCTGTTGCTCCGCCGACCCCCTGGTC  
GTGAGGCCTATCCTGGTGATG

>1670

TGACTTAAATTTGAAGATAGTTGATTTCTTACTTTAAGCTTGCTAGCGTGCGTATTTCTT  
ACATTATAGATCTTCTTGAAACAGAATTGTTCTACAAAGGTATCCGCCCTGCAATTAAC  
GTTGGTCTGTCTGTATCTC

>1671

TAATATATTAACCTATATTTGTATAGTGCTCTGTGTCACTGAGTTACAGTACAGTAATTTCT



GTATTGCAGGTAGCAGGTACCATGAAGCTGGAATTGGCTCAGTATCGTGAGGTTGCTGC  
TTTTGCCCAGTTCGGTTCTG

>1672

TCCTGACCTTGGTAACATGGCATTCAATTTCTTTGAGCAACTCACTTGGCATTCTTCTTGT  
ATCTTTTCAGCTCCCATGGCTATTGAAGAACAAGTGGCTGTTATCTATGCGGGTGTAAG  
GGGATATCTTGATAAACTGGA

>1673

TCTGTAGTTAGGCTAGTCATTAAAACTTTTTCCAGGTCAGAACTTACGACCTGCTTTTAT  
TTCCAAATAGGGCTGATGGAAAGATCTCAGAACAAATCAGATGCAAAGCTGAAAGAGAT  
TGTAACAAATTTCTTGGCTGGA

>1674

TTAAGTCCTGGCTTCCGATGACCTTTAACTGGCCTGACCCCAGCTCCTTCCAATATCTTT  
TGTCTGTAGTCAGGGACTATGCGGCGCAAACATCTCCTTCGCCAAAAGCAGGCGCCG  
CCACCGGGCGCATCGTGGCGGT

>1675

GTCTTGGTCGATTTAGGTCTTGATACCAATTTATCCTTATGTATAACCTGCGATGCCTGT  
ATCTAACAGGTGAGAGCACAGTAAGGACTATTGCTATGGATGGTACAGAAGGCTTGGT  
TAGAGGCCAGAAAGTACTGGA

>1676

AGGGATATATAAGATTATCATTGTCTTTCAACAAGGTGAATAGATACTATCCTCTCTTCTA  
CCTTTACAGATTTGCTCCCATTCATGCTGAGGCTCCAGAGTTCATGGAAATGAGTGTTG  
AGCAGGAAATTCTGGTGACT

>1677

ACTTTTTTTGAAGTTTGCTTATTTAGGAAAGCAGAACTCTTAAATATTCTTTCTTTTCAA  
CCTCTTATAGGGCTTTTTGGTGGTGCTGGAGTTGGCAAGACTGTACTGATCATGGAGTT  
AATCAACAATGTCGCCAAAGC

>1678

TTTGGGAACCTTCAGTATGTGGCTTCTCTACTCCTTTGTCAGGTTTTACGATTATGTATG  
ATTACTGCAGGTAGCGCTGGTATATGGTCAAATGAATGAACCACCTGGTGCTCGTGCCC  
GGGTAGCTCTGACTGGGCTGA

>1679

ACCTGGTTCATCTGGCCTTTCTTCGGATGAGGCTAAGGATGTAGACACCTAAGACCTTT  
TTTTCTTTTAGGTGTCTGCATTATTGGGCCGAATCCCTTCTGCTGTGGGCTATCAGCCTA  
CCCTGGCCACTGACATGGGTA

>1680

AGCGAGACCCTCTCAAAAAAAAAAAAAAAAAAATTTACTTTGGTTCCTGTTCTTCATGGG  
ATCTCACTTTAGGCTATCTATGTGCCTGCTGATGACTTGACTGACCCTGCCCTGCTACT  
ACGTTTGCCCATTTGGATGCTA

>1681

TTTCCCTTTGTTAGCTTGTCCCAAATTAAAGGAATGAGAATACTTAACTCAGTCTTCTTT  
TTTCTCATAGGACTACAAATCCCTCCAGGATATCATTGCCATCCTGGGTATGGATGAACT  
TTCTGAGGAAGACAAGTTGA

>1682

TGTTACATGATGCAGAAAGTTGATATCCCTCCGCTTCTTACTCTTTTTTTTTTTCTCCCCC

ATCATACAGGTGAATATGACCATCTCCCAGAACAGGCCTTCTATATGGTGGGACCCATT  
GAAGAAGCTGTGGCAAAAGC

>1683

AAGCCGGCTTGCTCTGTGCCCAGGCCCCAGCCTGGTGTCTCCCTCTGCCCTTTCCTCC  
GCTACTCTCAGGAACCCCCGGGGTTAGCACCGTGGTGTGGGTGCCTATGACCTGAGGC  
GGCGGGAGAGGCAGTCCCGCCAG

>1684

TGCTCCCAGGGGTCCCCATGAGGCTCCAGTCCCCAGGGCCACCCTCCCCTGACTCCAT  
TTCCTTCCCCAGCTGGACCGTGAGGCCAACCTCACCAGCAGCGTGACGATACTGCCAC  
TGCCTCTGCAGAACGCCACGGTGG

>1685

GCCTCTGCAGTTCTGGGGTGGCGTGGGAGCCAGGCCCTGGGACGCCCTGACACAGCT  
GCTGCCTGCCCAGGGGGACGGGGGCACCCCCCTCGTCTGCGAGGGCCTGGCCACGG  
CGTGGCCTCCTTTTCCCTGGGGCCCT

>1686

CTGGATTATTCTGAGTCCAAGCTAGGCCCTTTTGCTAATCATGTTTCATACCTCTTATCTTC  
CTCCACAGCTCCTGGGCAACGTGCTGGTCTGTGTGCTGGCCCATCACTTTGGCAAAG  
AATTCACCCCAACAGTGCAGG

>1687

GTCACCTGATTACAAATTTATGTTTTTAGATTTGTTTTTCCATTTTCAGCTTGACATTTAC  
TCATTTAGAGAAAACCTGTGGTTTTTCCCTCATGTGGAATGGAAGAATTGCCCAATAT  
TACTATACTTTTAAAAGCTT

>1688

CTTAATTTTACAATTTAGTAAAAGACAAGCTTAGTTTCATCATTAAAGTTAAATAATTTTTT  
TTCCCATAGAAAAATGCACTAAGCCTGACCTGAGTAATGGTTACATCTCTGATGTAAAG  
TTATTGTATAAAATTCAAGA

>1689

CATATTTTGAGATTTTTTATAATCTAGGTTATTAAAAAGTTTATAAAATAAATAATTTTTAT  
AATTTTAGAAACGTGTTTGGCTCCTGAATTATATAATGGAAATTATTCCACAACACAGAA  
AACATTCAAAGTGAAGGA

>1690

AATAGTGCATTTTGTGTAGCAGAAAAAATAAACATTTGTTTGTAATTTTATTCATTCTTT  
TATTTGCAGAAATTAAGTGCTCTTCTTTAAGATTAATTGAAAATGGTTATTTTCATCCTGT  
AAAGCAAACCTATGAAGA

>1691

TATTTTAATTTAATCTTTATTATTTTTTGTAATTATATGACTAAAGGTGCTGATTAATTTTTT  
CCATAAGGAAGAAGAAACAGATGTCTCCTCCACCTCTGCCCATAACTCCAAAATTC  
AAACACATTCAACAACTTA

>1692

GAAGCTTTGCTAAAATGAAATCTGCATGTGTAGCTAAATGGTCAGTTCTCTTTCAACTG  
TACCTTTTTCAGAAGGACAGGAGAAGGTAGCCTGTGAGGAACCACCCTTCATTGAAAAT  
GGTGCAGCAAATTTACACTCTAA

>1693

ACTATAGTATGAGTTACTATAGTATATTGTTATGAGCTCATATTAATTTTAAAACAACCTC

TTTTCTTAGAAAATAATGAGAATTGTAAGCATCCTCCTGTTGTAATGAATGGGGCTGTTG  
CAGACGGGATATTGGCAAG

>1694

TGTTTTAAAAAATATCACTTTTATATTTGTCAGACAAGTAAAGAATTTAAAAGAGCATTT  
TGTTTTACAGAACCATGTACTGTTAATGTGGATTACATGAACAGAAATAACATAGAAAT  
GAAGTGGAATATGAAGGGAA

>1695

TGTAGCACTTATAAAGTACTGGATGTTTATTATAGCAATTCATTGTATACTTTAAACTTA  
TTTTTGCAGAATCTAAAGGAATGTGCACATCTCCTCCTCTTATTAAACATGGAGTCATTA  
TTAGTTCAACAGTAGACAC

>1696

TGTTCTTACCAAGATGTAACAAGATAGTTTTCTTCTTTTTCTTCTTTTTTTTTTAAATTGT  
TGTTCCAGAGCCATGCACATTATCTTTTACTGAAATGGAAAAGAATAATTACTTCTGA  
AATGGGATTTTGACAACAG

>1697

GGCTGAGATTGTAATTAACACCTGACTGCAATTGATGCTTATTTCAAAAATCTCTCTTTT  
TCCCCTCAAGCACTCTGTCTTATCAAGAACCCTTAAGAACATAGAAATGAATGGCAGA  
AAGAGGAGTCATATTTCAATAC

>1698

GCAAAAAAATGGGGTGGAGGAAAATGAGGCATCTGTGTGAGTATATAACCATTTGAC  
ATCTCTTTTTAGCCCTCTCCAGGGTCACCCTAGAATCAGATCTGCTCCCCAGCATCTTCT  
GTTTCCTGGTGAGTGATTCTTG

>1699

TCACCTTTATCAGAAAACCTTCTCAGCCAGATACAGAAATCATTCCAATGACCTGACCTG  
TGTTACACAGAACTCCAGAACAAGACCAAGCTGACAGTGCTGGAAGGAGACATTCT  
GGATGAGCCATTCTGAAGAGAGC

>1700

AGATCTGTGTTTCGTGGTTGGCACCTCTTAGGGATATATCCTGACAGTGACAATATGCTCT  
TCATGGACAGGTACCCAGCTCCTGTTAGAGGCCTGTGTCCAAGCTAGTGTGCCAGTCT  
TCATCTACACCAGTAGCATAGA

>1701

AAGGGGAGAGCCCAGGGAGGGAAGGGAAGAATGGGCAGATGGGAGGGCAGCCAGCT  
TCTGCTCACTCCAGGCACAGCCATGGGAGATTTCGGAGATGGCAGTCTTTGGGGCTGCC  
GCCCCCTACCTGCGCAAGTCAGAGAA

>1702

ACTCCTAACCTCTTGAGGAAGGAGGGAAAGCCCAGGCTGACAGGAGGGCTTGGGTG  
GGGGCTCTTGACAGACAGTGACCGTGAAGGAGGACCAGGTGATGCAGCAGAACCCACC  
CAAGTTCGACAAAATCGAGGACATGG

>1703

CTCTAACTCCCAAAATCACCAGCCCTCCCCCTTCGCAACTGGCAAGTCACTGCTCCTTT  
TCTATCCCCAGACCTACTCGGGCCTCTTCTGTGTACCGTCAACCCTTACAAGTGGCTG  
CCGGTGTAACCTCCTGAGGTGG

>1704

CTCTCCTGATTTGAGGCTTGCTGGTCTCCAGTAGTATTGTTCACTGCCCAATAAGCCCCCT

GTCTTCACAGCGGAGAATCCGGAGCAGGGAAGACAGTCAACACCAAGAGGGTCATCC  
AGTACTTTGCTGTTATTGCAGCC

>1705

CCCTCCAAGGTCCTGTACCGCAGAAGGGAGGGAGAAGAGCTCTCACCTGCCTCCTTCT  
TGGCCTCTGCAGGGCACCCCTGGAGGACCAGATCATCCAGGCCAACCCCTGCTCTGGAG  
GCCTTTGGCAATGCCAAGACCGTCC

>1706

TATCATTAATTTTCCTTGTGCCCAAACCCTAACTTTTCTTTCTCTCCTTCTTCTCCCCACC  
TGTTACAGATCTTCTGGAAAAATCCAGAGTTATTTTCCAGCTGAAAGCAGAGAGAGA  
TTATCACATTTTCTACCAAAT

>1707

GTGCTGTGGCGAGCAGCCTCCATGAGAGCCGGGGGCTTGTGTCCCACCCTAACCATGT  
TTTTTCCCCTAGACATGCTGCTGATCACCAACAACCCCTACGATTATGCATTCATCTCCC  
AAGGAGAGACCACCGTGGCCTC

>1708

CTTACAAGGGATCTCACTTACCCATCATACTTCTTTTTCTGGGGTCCGCCAATATGGGGC  
CTCCCTACAGAACGCTTTTGATGTGCTGGGCTTCACTTCAGAGGAGAAAACTCCATG  
TATAAGCTGACAGGCGCCATCA

>1709

AGGCATGAACCACCACACCTGGCCAGCAGTCATCTCTTTACCAACTTTGCTACTTGCCT  
TTTCCTTCCAGAGGCTGACAAGTCTGCCTACCTCATGGGGCTGAACTCAGCCGACCTG  
CTCAAGGGGCTGTGCCACCCTCG

>1710

GGGATGAGAGTTTTCAAGTTCACTCTTCCCAACAACCCCTGCTCAATATGGGTCTCTCCT  
CCACCTTGCAGGTGATATATGCCACTGGGGCACTGGCCAAGGCAGTGTATGAGAGGAT  
GTTCAACTGGATGGTGACGCGCA

>1711

GGACGGGCACAGCCCCAATGGCCACTCACACCCACTTTCTGACTGCTCCCACCCCTCA  
TGCCCCCTGCAGTTCAACAGCTTTGAGCAGCTCTGCATCAACTTCACCAACGAGAAGC  
TGCAGCAGTTCTTCAACCACCACA

>1712

TGACCATAGAGCAGAATCCATGTCCACCTGTGTGAAGGACACTCAGTGATGCTCTCTC  
CTGCTTCCTCAGCCCATGGGCATCATGTCCATCTGGAAGAGGAGTGCATGTTCCCCAA  
GGCCACCGACATGACCTTCAAGG

>1713

TCTCCTCTCTTCTTCTCCTGCATCTCTTTCTGGCATTCTTTCTTTACTTTTCTCTATTGCATTTT  
GGCCACAGGAAAATCTGAACAAGCTGATGACCAACTTGCGCTCCACCCATCCCCACTT  
TGTACGTTGTATCATCCCTA

>1714

AGCCAGGATCAGAACCCAGAACTTCAGTCCAGTGTTCTCACAGACTCCTCCTACTTCC  
TTCTTGCCACAGGCGTGATGGACAACCCCTGGTCATGCACCAGCTGCGCTGCAATGG  
TGTGCTGGAGGGCATCCGCATCTG

>1715

GACCCTAGAATTCTATGGGCAGAGCAGATCACTGCAGAGCATGGGTGACTCTGGACAC

TTCCCTCCTCAGGTATCGCATCCTGAACCCAGCGGCCATCCCTGAGGGACAGTTCATTG  
ATAGCAGGAAGGGGGCAGAGAAG

>1716

AAGGTAATCCCCACCATCTCTTTCCCTCGTACCCCTCCCTAGTCATGGCCAACACACAC  
CTTGCCTGCAGGTGTTCTTCAAGGCCGGGCTGCTGGGGCTGCTGGAGGAAATGAGGG  
ACGAGAGGCTGAGCCGCATCATCA

>1717

TCCCAAGGTTTTCAGGACCTCAGGTAGGAAGGAGGCAGAGGCTCAGCACTCCTTTCAAT  
GGGCCCCCTGCAGAGACTCCCTGCTGGTAATCCAGTGGAACATTCGGGCCTTCATGGGG  
GTCAAGAATTGGCCCTGGATGAAG

>1718

TCCTTCCCTCTACCTGCAAGAATGAGGACCTTACCCCCTGAACAGCCTCCCCCTCTGTTC  
CTCACCTTCAGGAACAAGACAACCTGGCAGATGCTGAGGAGCGCTGTGATCAGCTGAT  
CAAAAACAAGATTCAGCTGGAGG

>1719

GGAGCTCCCCACAGATGGCACCAAGCTGGTGACCTTTGACCCTAAAGGAGATGGGATT  
CTTGCTCGGCAGGTGAAAAACCTGACAGAGGAGATGGCTGGGCTGGATGAGATCATT  
GCCAAGCTGACCAAGGAGAAGAAAG

>1720

GTAAGTGAACAACAAAATCACCAAGTCAGGATGCTTTGCCTCACTGGGCCTGGCTCCT  
TCTCTCTACCAGCTGGAAGGATCCCTGGAGCAAGAGAAGAAGGTGCGCATGGACCTG  
GAGCGAGCGAAGCGGAAGCTGGAGG

>1721

TTCAACCACTGGTGGACCCTCCTGAGGCCCCACGAGTCTCCCTTACCTCACCATCCCTC  
CTTCCCCACAGAAAAGACTTTGAGCTGAATGCTCTCAACGCAAGGATTGAGGATGAAC  
AGGCCCTCGGCAGCCAGCTGCAG

>1722

CCTTTTAGAGCCGGGGGGATTCCAGTGAGGGGTCCAGGCGGTGGGTCTGAGCCCTTT  
GTGTCTGACCAGGCACGCATCGAGGAGCTGGAGGAGGAGCTGGAGTCCGAGCGCACC  
GCCAGGGCTAAGGTGGAGAAGCTGC

>1723

TTGCACCTCTTACACCCCTTCATTCCCCCGCCCCAACATCCATCATATAACTCTCCTT  
CCCTTCTCAGGCTAACCTGGAGAAGATGTGCCGGACCTTGGAAGACCAGATGAATGAG  
CACCGGAGCAAGGCGGAGGAGA

>1724

ATGGGGCCTGAGGGCTAGAGGAGGAGGTGGGGATAGAGAGGAGTGCTGATCTAGAAT  
GGTGCTTCCCCAGGTGAGCTGTCCCGGCAGCTGGATGAGAAGGAGGCACTGATCTCCC  
AGCTGACCCGAGGCAAGCTCACCTA

>1725

GAGAAGGGCAAGGGTGGGGTTGCTTTATGGAGAAAGCTGAACCCACCTCCTGGTGCC  
CACCCCTCCCCAGGCGAAGAACGCCCTGGCCCACGCACTGCAGTCGGCCCGGCATGA  
CTGCGACCTGCTGCGGGAGCAGTACG

>1726

CATGTTGTTTACCTCTTGTCCTCCCATCCACACCCTCCATCCTCCCCACCCTCTGCCACCTC

CCCTGGGCAGGAAGAAGCTGGCCCAGCGGCTGCAGGAAGCTGAGGAGGCCGTGGAG  
GCTGTTAATGCCAAGTGCTCCTCG

>1727

GGTCCTGAGACAGACCCTGGACATGGGGCTGAGGCTGGGGGGCTGAAGAGTGAGCCT  
TGTCCCCGGGCAGATCCTGGCCGAGTGGAAGCAGAAGTATGAGGAGTCGCAGTCGGA  
GCTGGAGTCCTCGCAGAAGGAGGCTC

>1728

AAGAGGCGTGTCCCTCCAACCTCCACTGGACCTCAGCAGCCCTCAACCGAGTTACCGTG  
TTCCCCACACAGAGGAGATCTCCGACTTGACTGAGCAGTTGGGTTCAGCGGAAAGA  
CTATCCATGAGCTGGAGAAGGTCCG

>1729

GTGAGCAGGCCCCACCCTGCCCTGTGCCCTGACTGTCTGCCTGCATCCCCCTCCCCCA  
ACCCCTTCCCAGGCCTCCCTGGAGCACGAGGAGGGCAAGATCCTCCGGGCCAGCTG  
GAGTTCAACCAGATCAAGGCAGAGA

>1730

TCTGACAGGTGCCTTTAGTGAAGGGAACCGAGGCTGGCTCCCTGCTCATGCCACTCT  
CCTGATCCTCAGGACACCCAGATTCAGCTGGACGATGCAGTCCGTGCCAACGACGACC  
TGAAGGAGAACATCGCCATCGTGG

>1731

AGCAAGGCTTGAGAGCTATGCATAGATGCTCAATGCTTTTCCTGCTCTGCCCAACCCTC  
CCCCAACCCAGAACACCAGCCTCATCAACCAGAAGAAGAAGATGGATGCTGACCTGT  
CCCAGCTCCAGACTGAAGTGGAGG

>1732

TCTCCGTGGGCTGGGCAGCAAGTGTGTGAGGACTTGACCAGACCATGTGCCACCTCTC  
TCCTGCACACAGGCCGCCATGATGGCAGAGGAGCTGAAGAAGGAGCAGGACACCAGC  
GCCACCTGGAGCGCATGAAGAAGA

>1733

GCAGGGCGGAGGGGATGCTACCTTCTATGACTGTGCCATCTTCACCCCCTGCCTACCCT  
CTGGCCCCCAGACGGAGGAGGACAGGAAAAACCTGCTGCGGCTGCAGGACCTGGTAG  
ACAAGCTGCAGCTAAAGGTCAAGG

>1734

GAGCTCGTCCCCCAAGCCAGGAGTCTGAGAACCCAGGCCCCCTCTCACCTCATGCTCC  
CACCTCCCGCAGGAGGAGCAAGCCAACCAACCTGTCCAAGTTCCGCAAGGTGCAG  
CACGAGCTGGATGAGGCAGAGGAGC

>1735

GTTCCCATGCCCTGTCCCTGCCCAATACCATCTCTCCAAGGACTGATTGGACTTTGTTTC  
CTTTCAAAAGGGCTTGAATGAGGAGTAGCTTTGCCACATCTTGATCTGCTCAGCCCTGG  
AGGTGCCAGCAAAGCCCCATG

>1736

CTTGGGTGCCATGAAGGGCTGGTGAGCCAGGGGTGGGTCCCTGAGGCTTGGACGCCC  
CCATTCAATTGCAGGAGCAGCGCAACCATTTGCAGGGCAAACCTGTCGGAGCTGCAGGTG  
GAGCAGACATCCCTGGAGCCCCCTCC

>1737

GTTTAATAAAACATTTGTTTTTAAAGAGACTGGTCAGCATTGCTAATTTAAATTTTCTT

TTCTTAATAGGTGAATATGTTTACAAACCAAGGAACAGTGATCCACTTTAACAACCCTA  
AAGTTCAGGCATCTCTGGCAG

>1738

GCCCGTTTTGGGAACCTGGACACAGTGCCCTCACTTGCCTCCTTCCCCATCTGATCCT  
CACACCCACAGATGTCTCCAAGCTCACAGACACCATCTGCGGGGTGGGGAACATGTCA  
GCAAACGCCTCTGACCAGGAGAG

>1739

GATTCCAGAGGTAAAAGCGGCCATGGGCCAGACATACTGCAATCTCTGAAAATCACCT  
GTTCCCCTGCAGCCCAAGAGCCAAGAGACCTGCCGGGGGGCCCTCATCTCCGACCAAT  
GGGTCTGACAGCAGCTCATTGCT

>1740

CTACCACCTCACCCAGCCTCTGGCCCCTGCAGGAGCCCTGGTCTAGCCTAATCTAGTGT  
ATCATTTCCAGGAGACCCCAAATCCCAGTGGGGCAAAGAATTCCTTATTGAGAAGGCG  
GTGATCTCCCCAGGGTTTGATGT

>1741

AGAGTGCTCTGGAGATCCCTGGAAGAGACTACTGGGGACAGGCTGGTGTGACCCTTG  
CTCTTCTCCCCAGGCCCATCTGCCTTCCCTGCACGATGGAGGCCAATCTGGCTCTGCGG  
AGACCTCAAGGCAGCACCTGTAGG

>1742

AGTCCCCAAGCCAGGAACCTGGATTCTGGGTAAAAGGACCAGCACCAACATCCCCCTC  
TCTTGACTATAGAGAATGAACTGCTGAACAAACAGAGTGTTCCCTGCTCATTTTGTGCC  
TTGAATGGGAGCAAACCTGAACAT

>1743

GGCGTGAGCCACTGCACCCACCCGGGTCTGCTTATTCTACCCTTCTCTCTGGTTCCAC  
CCCTGCTGCAGTGGACAAGCTGTGCCGAGGTTGTCTCCCAAGAAAAAACCATGTTCCC  
CAACTTGACAGATGTCAGGGAGG

>1744

GATCTAGGGAGGTTGGGGCTTACAGTTGGGGCTGTGGCAGCCTCCCAGCCAGTTCTCT  
CCTTTTCTCCAGGTGGGTCTGGTGAGCTGGGGTCTTTACAACCCCTGCCTTGGCTCTGC  
TGACAAAAACTCCCGCAAAAGGG

>1745

GGAGGGGGAAGGGGAAGAATCCAGGGTTGTCATCACCCTGAGTATGGATTTCACATT  
CTAACACATTAGAAGCTGCAGGATGCTGAAATTGCAAGGCTGATGGAAGACTTGGAAC  
GGAACAAGGACCAGGAGGTGAACT

>1746

GCTGACATCTACCCCTTTAGGACCTGAGTTCTCTCTGCTCCCTCCTGAGTGCCCTGCCT  
TCTGCCTGCAGGTTCTGGTACCCCCGGGCTATGGACAGGATGTACGGAAGTGGCCACA  
GGGGGCTGTTCCCTCAGCTCCCAC

>1747

AGCGACAGAACGAGACTCCGTCTCAAAGAAAAAAAAAAAAAAAACAACTCTGGGCCAA  
CGTTATCCCTCCAGACACCTGAAAGACCCCGCCGTGGCATCCCAGGGCTTCCTGATGG  
CCGCTTCCATCTGCCGCCCCGAATCC

>1748

GGGACCTCTGATCTGGCCTTGGTAGGAGGAACCCTCTGACCAGCCTTTTCTGCCCCATC

CCTCACTGCAGAGCTGATGGGAACCCCTGATGGCACCTGCTACCCTCCACCACCAGTA  
CCGAGACAGGCATCTCCCCAGAA

>1749

CCACCCAGAGCTTTGAGGATTTGGAAAGCTGGGGCTAGGACCTTTCTAGCTAACTTGG  
GCTCTTTCTTAGATGTCTCACCTGTTCAATGTGGCACACACACTGCGTATGATGGTGCA  
GAAGGAGCGGAGCCTCGACATCC

>1750

GTGGTGCCTAGCTGGGGTTTCCCCAGGGTGGACACGCATACGTACACCTTCCATCTTGC  
TCTTTCCCTAGGGGAAGGTCATGGCCTCCATGTTCTATGAAGTGAGCACACGGACCAG  
CAGCTCCTTTGCAGCAGCCATGG

>1751

CCAGAAGAGGGGGACTGGCAGTTGGGGGGCCTCTGAGCTGCAAAAGACAGGATTTTC  
CCCTTTTTTCCAGCTGGCCGCCAAGCACTGCCGGAGGCCAGTGATCAATGCTGGGGAT  
GGGGTCGGAGAGCACCCCACCCAGG

>1752

TAAAAGCTTGGAATGATGTCGGGGGGCACTCAGTCTGGGATCCCTGTGGTGACTGGA  
TTCCTCTCCTAGATCACGATGGTGGGTGACCTGAAGCACGGACGCACAGTACATTCCC  
TGGCCTGCCTGCTCACCCAGTATC

>1753

AGCCATGGAGATGTGGGTGGGCAGTCAGAGCCCAGCGCTGCATCCACCATGGCTCTC  
CTCACCTCCAGGAGGAATTCGAGAGCATTGAGGAGGCGCTGCCTGACACTGATGTGC  
TCTACATGACTCGAATCCAGAAGG

>1754

AGCCAGACTTGTGTCCTCTGTAGCCACTCCTACCCCAAGGCACTAATGGGGACCCCA  
TCTGCTTTGCAGTGCTTTGGTCAGTTCATCCTCACTCCCCACATCATGACCCGGGCCAA  
GAAGAAGATGGTGGTGATGCACC

>1755

ACTTAGTCCTGGACAAGCCATCCATGGGCTGCACGATAACACTTCCTTTTTTTTTTTTTT  
TTTTTGCAGCGTGGAAGTGGACTCGGATCCCCGCGCAGCCTACTTCCGCCAGGCTGA  
GAACGGCATGTACATCCGCATG

>1756

AGCCACCAATCTGGTACCCACATTGCAGGTTCAAGCAAGCATAGAGCTAAGTGCCAAAT  
GCTTCCTTCCAGGGGAGATCATCGGAGGCCGGGAGAGCAGGCCCCACTCCCGCCCCTA  
CATGGCGTATCTTCAGATCCAGAG

>1757

CTGTCTGCCTACCCTGCAGAGCTGGTGGACCATAGCTCCTGCAGCCCAGACCTACCTCT  
TGCTTTTGCAGCAATATAAATGTCACCCTGGGCGCCCACAATATCCAGAGACGGGAAA  
ACACCCAGCAACACATCACTGCG

>1758

CTGCACCAGCGACCCCCGAGCCTTGGCTGGAGGCCCCAGCTGAGCGGGAACGCCTAC  
ATTCTTCCTCCAGCTGAGCAGAAGAGTCAGACGGAATCGAAACGTGAACCCAGTGCC  
TCTGCCTAGAGCCCAGGAGGGACTGA

>1759

AGAGCCCGGAGCTCAGGGAAGCAGGAGCAGGGAGGCCTGTCTCAGTCTCCCTTCTCC



TCTCTACCTACAGGGGGATTCCGGAGGCCCCCTGCTGTGTAACAATGTGGCCACGGC  
ATCGTCTCCTATGGAAAGTCGTCAG

>1760

TGGAGAAGTTGCTGGTTTGGTCCCAGTGGGAGGTCTATGCTGATTCCTGGGTTCCTCCA  
CCTTGTTCCAGGGCACCAAAGCCCAGTTCAGCTGCTTCAACCCCAAGTGCCTCCTGCC  
TGCCAGCCGGCACTACTGGACCT

>1761

GATGCATCTGGGGTCATAGAGGACCACAGCACCCCCAATCTGCCCTGAGCATTCTTCT  
GCTTCCTCAAGATGGGGAAGTTCCGGAGCCTGCTTTTTACCTCGGAGGACGATGAGAG  
GATCCACATGGTGAACAACCTTC

>1762

TAGTATCATTGTATAGAATTTTACCCCATGGGTACAATGTATTAAGTATGTTCTCTTTCTC  
TCCATAAAGTTGCTGATCCCACACCCTTTCATATTCAAGCTGAAGTGACGATGAAAACA  
AATTTCTTTGGTACCCGAGA

>1763

AAATTTGGCATTACCTCTCTACGGGATTGTTGCACACCTTTCTACATAATGCTTTGTGG  
TGTATCTTAGGGAGAGTGGTGAACGTATCTAGCATCATGAGCGTCAGAGCCCTTAAAAG  
CTGCAGCCCAGAGCTGCAGCA

>1764

GTGTGAGGAGTCGGGGGGCTTGGAGGTCCCCCCCACCCATGCCACACCTCTCTCCCT  
CTCTCTCCACAGAGGGAGATAACGCTGTGCTGCAGTGCCTCAAGGGGACCTCAGATGG  
CCCCACTCAGCAGCTGACCTGGTC

>1765

TCTGTCTTTGAGTCTCTATCTCTCTCCCTCTCCTGGGTGTCTCTGCATTTGGTTCTGGGT  
CTCTTCCCAGGGGAGCTGTTCCGGTGGAATGTTTCGGACCTAGGTGGCCTGGGCTGTG  
GCCTGAAGAACAGGTCCTCAGA

>1766

GGGGAGGGGAAACTGAAGAGGTGAAACCCTGAGGATCAGGCTTTCCTTGTCTTATCTC  
TCCCTGTCCCAGACCTCACCATGGCCCCTGGCTCCACACTCTGGCTGTCCTGTGGGGTA  
CCCCCTGACTCTGTGTCCAGGGG

>1767

CCTTGAGATCTCAGGATTGGGACGTAAGATGCCAGCCTGGGGTCCTCGTCTCATAGCCC  
CTTCCCCCTAGTACTATGGCACTGGCTGCTGAGGACTGGTGGCTGGAAGGTCTCAGCT  
GTGACTTTGGCTTATCTGATCTT

>1768

AGAATCTTGAGTGGGTCCGCCATTCCATTCCAAGTCGGCCCTCACCGTGCACTTCCTCT  
TCTCCC GCCAGATTCTTCAAAGTGACGCCTCCCCCAGGAAGCGGGCCCCAGAACCAGT  
ACGGGAACGTGCTGTCTCTCCCC

>1769

GCCGCGCGGACCCTTAGCCTTGACCGCCCCCATCTCTTCTGACCCCGTCTTACAATGCC  
CCTCTCACCAGGACGCGCCAGCGTTGGGCCGAGGCCTGGGGGGCACTGCCCCGTC  
TTATGGAAACCCGAGCAGCGACGT

>1770

GAATAGTGGACTGGGCCCTGGAGGAGAGGGGGCATGACTCGGTTCCCCATCCCCATCC

CCAAACCCCCAGGCCAGAGAAGAAGAGGAAGGGGAGGGCTATGAGGAACCTGACAGT  
GAGGAGGACTCCGAGTTCTATGAGAA

>1771

GTCTTCCTCCTTACCGTAGGCTGTACTTCCCATGCCCTAGCCTCCAATTCTCCATCCCC  
GCCCAAGCAGGGTCCCAGTCCTATGAGGATATGAGAGGAATCCTGTATGCAGCCCCC  
AGCTCCGCTCCATTCGGGGCCA

>1772

CTGGGCTGACTTTGCCTTCCAGCCTACTTCCAGTGCCACCCATGTTCTCCTCCTCCCTG  
GTCCTATCCAGATGCAGACTCTTATGAGAACATGGATAATCCCGATGGGCCAGACCCAG  
CCTGGGGAGGAGGGGGCCGCAT

>1773

GGGTTCTAGGGCCTGGTGGGCAGGGGGAGGACTGCTGGACCCCTCCCCATCACCGTT  
TCTTCTGCATAGCCTGGATCTCCTCAAGTCCCCAAGATTCACACCTGACTCTGAAATCT  
GAAGACCTCGAGCAGATGATGCC

>1774

CAGAGGGGAGGCCCCGGCCAGGTCCTCCGGCAACTCCCGCGTGTTCTGCTTCTCCGGCT  
GCCACCTGCAGGTCCCAGCTCTTGCTCCTGCCTGTTTGCCTGGAAATGGCCACGCTT  
CTCCTTCTCCTTGGGGTGCTGGTG

>1775

GCAGGGGCCAGGGCTGGGGAAATGTGTCACCATCCCCAGTCCCTGACCCACCCACCCCT  
GTCTCTCCACAGGCCCTGGGTGCCAGGCCCTGTGGATGCACAAGGTCCCAGCATCATT  
GATGGTGAGCCTGGGGGAAGACGC

>1776

GGTGGGCGGGGCCAGGAGGCTAGGGAGGGCAAGAGGGGCCAGGGCTCTGAGCCATA  
CTACCTCCTTGCAAGAGCCGCCCCCAGGCCCTTCCTGGACATGGGGGAGGGCACCAAG  
AACCGAATCATCACAGCCGAGGGGAT

>1777

ATCCAGGAGGGTCTGAAAGATATTCACCTCCCCCTGCTCACTGAGGCACCCACCCAC  
CCACCCCTACAGAAACGATGGCAGAACGAGAAGCTCGGGTTGGATGCCGGGGATGAA  
TATGAAGATGAAAACCTTTATGAAG

>1778

CTGGGGGTGGCTGGGGGCAGGGACCCAGGTGTCAGGGTGCTGATGTTGCTGCCTC  
ATTTCATCCCAGGCCTGAACCTGGACGACTGCTCCATGTATGAGGACATCTCCCGGGG  
CCTCCAGGGCACCTACCAGGATGT

>1779

CCCAGGACCCCATTTTTCCACCCTAATGCATAGGTCCCAATATTGACCGATGCTCTCTGC  
TCTCTCCTAGCCTCACTTCTAACCTTCTGGAACCCGCCACCACTGCCAAGCTCACTAT  
TGAATCCACGCCGTTCAATGT

>1780

CTTGCCCTTGCCCCCTCCGGATTCAGGCCGATGGGTTGAGCCCCCCTGACCCTGCCCGTGT  
CTCCCTCGCAGCTGGGCGCCGTGTACACAGAAGGTGGGTTGCTGGAAGGCGTCAATA  
AGAAGCTCGGCCTCCTGGGTGACT

>1781

GCCGGA CTGGCCCTGCGGCGGGGCGGGTGAGGGCGGCTGCCTTCCTCATGCCAACTC

CTGCCACCTGCAGGGACCCTGAAGGCCAAGAACTTCAAGAAGAGATGCCTGCAGGCC  
ACCATCACCCAGGACAGCACCTACGG

>1782

AGGGACAGGGGACCGGCTGGAGACAGGGCCAGGCGGGCGTCTGGGGTCACCAGCCG  
CTCCCCATCTCAGTCTCCCGGGACCTGCCCCGTTATGATCTGGATCTATGGAGGCGCCT  
TCCTCATGGGGTCCGGCCATGGGGC

>1783

GATCTCCCCCTCCTGGAGGCCAGCCTGGGGCACTGGTCTCTAGCACCCCCCTCCCCCTGC  
CCCTGCCCCCAGGTAACTATGGCCTTCGGGATCAGCACATGGCCATTGCTTGGGTGAA  
GAGGAATATCGCGGCCTTCGGGGG

>1784

TGTCCTTGTCCCAGCGTGGGGTGGGCAGAGTGGGGAGCGGCCTTGGTGACGGGATTT  
CTGGGTCCCGTAGACCCTCTCCCCCTACAACAAGGGCCTCATCCGGCGAGCCATCAGC  
CAGAGCGGCGTGGCCCTGAGTCCCT

>1785

CTTGCCCTTCAAATGGTTCTGAGCCCTGAGCTCCGGCCTCACCTACCTGCTGGCCTTGGT  
TCTGCCCCCAGGTGGCTGAGAAGGTGGGTTGCCCTGTGGGTGATGCCGCCAGGATGGC  
CCAGTGTCTGAAGGTTACTGATC

>1786

GGCAAGGGGCGGCTCAGGGGAAACTGGGAGGTACAAGAACCTGCTAACCTGCCTGGC  
CTCTCCCACCCAGACCCCATGCTGCACTATGTGGGCTTCGTCCCTGTCATTGATGGAGA  
CTTCATCCCCGCTGACCCGATCAA

>1787

GTCGGGGTGAGTATGCACACACCTTCCTGTTGGCACAGGCTGAGTGTCAGTGCCTACT  
TGATTCCCCCAGGGAGGACTTCTACAAGCTGGTCAGTGAGTTCACAATACCAAGGGG  
CTCAGAGGCGCCAAGACGACCTT

>1788

CAAGTCCGGTCTCTGGGCTGATCGGTCCCCAGTGAGCACCTGCCTACTTGGGTGGTC  
TCTCCCCTCCAGGAGTGCCAAGACCTACGCCTACCTGTTTTCCCATCCCTCTCGGATGC  
CCGTCTACCCCAAATGGGTGGGG

>1789

TGCAGGTGGAGAGCAGGCTTCAGCCCCCTGGGAGTCCCCAGCCCCTGCACAGCCTCT  
TCTCACTCTGCAGGGACCCCAACATGGGCGACTCGGCTGTGCCACACACTGGGAAC  
CCTACACTACGGAAAACAGCGGCTAC

>1790

GAACAGCCCCTTTCCTGTGCCCCACTTGTGAAAGTCTCCATAAACCCCTGTGGCCCAC  
TCTGCCTTCCAGAGAGAGGGGCTGAACTGCAAGGTGGCCACCAACACAGAGGCCCTG  
CAGAGCGGCAGGATGGAGATGTGGA

>1791

TCTCTAGTGCTCTGCCATGGGGAAGGGTCCCACGTCCATCTCATCGCACCCACCTATCTC  
TTGGCCACAGAAAGCATCGCTGGAGGGCAGCCTGGTGGAGACGGAGGTGTGTTACA  
GGACCCAGCTGGCCCAGCTGCAGG

>1792

GGTGGAGAGTTTATTGAGTGTTTGGGTATTGGCTTGTCACCTGCCAATCTGTTCTGCCC

ACTCCATCCAGGCCTGGGGCTCCTAGAAGACCAGAGGGGAGGAGGAGGAAGGATTAA  
GGGTGGAGGGAAGGGACAGCCCCT

>1793

AACTCTGGTGTGGGCTCAGCACCCCATCCGATGACCTGACTACTCTCCCATCTCCGCT  
GATCCTCACAGCCACCGTGGACAATGCCAACATCCTGCTACAGAATGACAATGCCCAT  
CTGGCTGCTGCTGACTTCCGCAC

>1794

AGGTGAGCAGCCAGGACCTGGACCTGCAATTCCAAGCAGCCTGGGCTGAAGTCCCTG  
ATTCCCATGGCAGGTTTGAGACAGAGCAGGCCCTGTGCTGAGTGTGGAGGCCGACATC  
AATGGCCCGTGCAGGTGCTGGATGA

>1795

GGAAGGCTTGGGAGTGAGAGATCAGGATGGGTCCAGATGCGCACATCCACATCCCCTT  
TTTCCATAGGAGATGAACGCCCCGCGAGCCAGGTGGGCGGTGAGATCAATGTGGAGAT  
GCGCTGCCCAGTGTGGACCTGAGC

>1796

ATTTGGGAGGAGGCCTGACTGAGGAGAGGGATCCAGGCTCACACCACCCTGTCTGT  
GTTCTGTCTGCAGACAGAGGAGCTGAACCGCGAGTGGCTACCAACAGTGAGCTGGTC  
CAGAGCGGCAAGAGCGAGATTTCCGA

>1797

GCATGGGGATGGGCCCAGAAGAGGACACTGACAACCCTCACTGACCCCTGGTCTTCCT  
GCCCTCCTGCAGAAAGCATCCTGGAGGGCAACCTCGGCGGAGACAGAGAACCGCTAC  
TGCATGCAGCTGTCCCAGATCCAGG

>1798

TGAGCTCACCTCAGAAGAAACCCCAAGCCATCACTGTCGCTCCTTTTCCTTCCTTCTT  
CCTCACAGCAGGTCTATAACAGTCACCCTTGGAGCCCATAACATAACAGAGGAAGAAG  
ACACATGGCAGAAGCTTGAGGTT

>1799

TCCCTCCCTGATCACCTCCAACCTGTCCAGAGCCCATTTTCGAGGACTGACAGTCCTTCAT  
TCCCTTCACAGTTGAAGGAGAAAGCCAGCCTGACCCTGGCTGTGGGGACACTCCCCTT  
CCCATCACAATTCAACTTTGTCC

>1800

AACCCAATTTGTCCATTTCATTGGAGAGAGTATCTATGGCCGTGTTCAAACCCTGGGGTG  
CTCTGTTCCAGGGGAGATCATCGGGGGCACAGAATGCAAGCCACATTCCCGCCCCTAC  
ATGGCCTACCTGGAAATTGTAAC

>1801

ATGAGCTCACCTCAGAAGAAACCCCAAGCCATCACTGTCGCTCCTTTTCCTTCCTTCTT  
CCTCACAAACAGGTCTATAACAGTCACCCTTGGAGCCCATAACATAACAGAGGAAGAAG  
ACACATGGCAGAAGCTTGAGGTT

>1802

TGCCCTCCCTGATCACCTCCAACCTGTCCAGAGCCCATTTTCGAGACTGACGGTCCTTCAT  
TCCCTTCACAGTTGAAGGAGAAAGCCAGCCTGACCCTGGCTGTGGGGACACTCCCCTT  
CCCATCACAATTCAACTTTGTCC

>1803

CAAGCTGGCTGGCAGACAGGAGTGGAGGACTTCCCGGGCTCACCTTCTTCTCTCTCTC

CTCTCTCTACAGGGAGACTCTGGGGGCCCTCTTCTGTGTGCTGGGGTGGCCCAGGGCA  
TCGTATCCTATGGACGGTCGGATG

>1804

TCTCATGAGCCCCAGATCTGGATGGGACCCAGCCCTGGCCTTGCCCTGAGTTTCCCCC  
ATGTTCCCCAGAGACCACGACCAGCACCACCAGCTCCCTGGCACCCCCACCTACCACG  
AAGATCTGTGACCCTGGGGAGCT

>1805

GTGGCAGAGGGAGCCTGAGGGAACCCCCACTCCAGCCCCCTCCCTGACAGGCCCCCTG  
CCTGTCTCTACAGAGCCCGGCACCCCATGAGGACATGCAGAGCACCTGCAGAGGAGC  
AGGAGGCCGGAGCTGAGCCTGCAGAC

>1806

TTTTTCTCTCTGGCTCCCCACCCCCTCCTTCCCTTGGCTCTCTGCTTCTCCCTCCCCACC  
CTTGGTGCAGAGGAGGCTGGCAGCTGTGTGCAGGATGGGCAGAGGTATAATGATAAGG  
ATGTGTGGAAGCCGGAGCCCTG

>1807

GCAGCCAAGGGACAGATGGCTCTTGGAGAAACACTGCTTCCCATTGATGCCTTTTTTCT  
CTTTATGCCAAGGGTGGCCCTGGACCTCGTGGCAGAGATGGAGAACCTGGGACCCCTG  
GAAATCCTGGCCCCCCTGGTCCTC

>1808

AGACTTACCTAGCCAAGTAGGGAAGACCTAGTGCCTTTCAACCTCCTAACGTTGTTGG  
GTTTCTTTGCAGAACTTTGCTGCCCAGATGGCTGGAGGATTTGATGAAAAGGCTGGTG  
GCGCCCAGTTGGGAGTAATGCAAG

>1809

ATTGCCCACCCACTAGAGGTCTGTGTCCCCCTCTCTTCTTCTTCATTTCATACCTCCCTGT  
CTCTTCCCAGGGTGAAGCCGGCCCCACTGGTGCCCGTGGTCCTGAAGGTGCTCAAGGT  
CCTCGCGGTGAACCTGGTACTC

>1810

GCTACCCCAGGAGAGCCCAGTCCTGCCTCTCCCCCTCTCCTGACACCCCTCCCTTCTTCT  
CATGCCCACAGGGTGCTCCTGGCATTGCTGGTGCTCCTGGCTTCCCTGGGCCACGGGG  
TCCTCCTGGCCCTCAAGGTGCAA

>1811

ACTCTAGATCGAGGCTTGCTCCAAGGCCAGGTGAAGGCTCACTCTGTTTCTCTTTTTTG  
CTGGTCCTCAGGGCCCTGCTGGCCCCCAGGGAGCCCCCTGGACCCGCTGGTGAAGAAG  
GCAAGAGAGGTGCCCGTGGAGAGC

>1812

AGGGGCTGGGGTCTCCCTGCATCGCTGAGGTCACATGGTATCCCACTGACTCCCTGT  
GTACCCTTGTAGGGAGCCCCTGGAGAGCGAGGGCCCAGTGGTCTTGCTGGCCCCAAG  
GGAGCCAACGGTGACCCTGGCCGTC

>1813

CTTAGTGGATGTTGGGTGGATGGATGTGGTCAGAGTGTCTATGTTCTGAGAATGGTGTT  
CTGTCTTTTACGGGAGCCCCTGGTGAAGATGGTCGTCCTGGACCTCAGGTCTCAGGG  
GGCTCGTGGGCAGCCTGGTGTCA

>1814

CTCCCTGCTTCTCCCTGGACCTTCTCCCCCACTGCTGTTGGTTGATCACTTCTTGGTGTC

TCTGCCGCAGGGTGAACGAGGTTTCCCAGGTGAACGTGGCTCTCCCGGTGCCCAGGG  
CCTCCAGGGTCCCCGTGGCCTCC

>1815

CAGGCTCCATGAACATGGGTTCAGGGAGAGGTGCTGTCCACTACAGACTCCCTCTTAC  
CTCCCTCCCCAGGGTGCATCTGGCCCAGCAGGCCCCCTGGCGCACAGGGCCCTCCAG  
GTCTTCAGGGAATGCCTGGCGAGA

>1816

CGTCTTCTGGAAGAGCTCCAGGGTTTTAGCCTGCCCCCTCATTCACCTGCTTCCCTCCTT  
CCCCATTATAGGGTGCTGATGGCCAGCCTGGGGCCAAGGGTGAGCAAGGAGAGGCCG  
GCCAGAAAGGCGATGCTGGTGCCC

>1817

ACAGTGACTTTGGCAGCCTGGATGAGGAAGGGTGAGATGAGTCCTCACTTCCCGCATT  
TTCTCCTTCTAGGGCAACCCTGGACCCCCTGGTCCCCCTGGTCCTTCTGAAAAAGATG  
GTCCCAAAGGTGCTCGAGGAGACA

>1818

CAGAGCTGTGCTGAGAGGACGAAGAGGCTGGGCCACTGTCAGTTCTCATCTCCTGCCT  
CTCCTCTCTCAGGGTGCCGAAGGTCCACCAGGTCCCCAGGGTCTGGCTGGTCAGAGA  
GGCATCGTCGGTCTGCCTGGGCAAC

>1819

TGAAGGGTCAGTGGGCCCTGGGCAGGGGTGCTTACCACTTGCACTCATCATCCTTGTC  
TCTGTCTCCAGGGTGAGCCCGGCAAGCAGGGTGCTCCTGGAGCATCTGGAGACAGA  
GGTCCTCCTGGCCCCGTGGGTCTCTC

>1820

CTAGAAGGACCTTCTGTTCTGTCTCTTCTGGAACATTCTTCTCTGAGCCTGAGACCTC  
TCTCCTGACAGGGTGATCGTGGTGAGACTGGTGCTGTGGGAGCTCCTGGAGCCCCTGG  
GCCCCCTGGCTCCCCTGGCCCCG

>1821

TTGGGTGGGACAGGAGGGGGCTCCTGTCTGGCCCTGACCTGACTCAATCGGTGTCTG  
TCTTGTTCCCAGGGTCCTCAAGGCCCCAGAGGTGACAAAGGAGAGGCTGGAGAGCCT  
GGCGAGAGAGGCCTGAAGGGACACC

>1822

CCCAGCCCCAGCGACTCCCCAGCCTTCCCTGTGGTGACCACTCTTTCCTCACGACCTC  
TCTCTCTTGACAGGGTCCTCCTGGCCCCGTGGTCCCTCTGGCAAAGATGGTGCTAATGG  
AATCCCTGGCCCCATTGGGCCTC

>1823

AGCAAATGGGGATGGACATGGAGGGGGCACTTTCACACAATCCTGGCTGATCTCTCTGT  
TTCCTGCTGCAGGGTCCTCCTGGAAATCCTGGGCCCCCTGGTCCTCCAGGTCCCCCTG  
GCCCTGGCATCGACATGTCCGCCT

>1824

CCTGGGTCTCTCAAGCTTTTGTGTCTGTGCCTGTCTGAGCCCCCATGGGTGCTGCCTCT  
TCCCCCTGCAGGAGACTACTGGATTGACCCCAACCAAGGCTGCACCTTGACGCCATG  
AAGGTTTTCTGCAACATGGAGAC

>1825

GCCCCCTACAGCCCCTGGTCCCATTGAATGCCAGCTCCCAGGCCTCACACTGCCGCTCTC

TGCCCCAACAGTTCAGCTATGGAGATGACAATCTGGCTCCCAACACTGCCAACGTCCA  
GATGACCTTCCTACGCCTGCTGT

>1826

GCTTCTGGGCAGCTGGAAGTGGGTAGCAAGGCATCTACTGAACAGAGCCTCCTCCTTT  
TTTCTCCCCTAGAAACATAACCGGTAAGTGGGGCAAGACTGTTATCGAGTACCGGTCAC  
AGAAGACCTCACGCCTCCCCATCA

>1827

GAGGCCACCGTGCGGGTAGGCGGGTGGTTGGCCTCCCAGAAGAGGCCCTGATCTCTC  
CTGCCCCGCCCAGTGACCTGCACGCGCCTTTACGCCGCTGACATTGTGTTCTTACTGGA  
TGGCTCCTCATCCATTGGCCGCAG

>1828

AGGCCTCCTCAAGGCCAGGGCCAGAAGAGATCCTGAGTCCTAGCCTGTTGCCACCCCT  
ACCCTCCAACAGGACAGAGTTCGGCCTGGATGCACTTGGCTCTGGGGGTGATGTGATC  
CGCGCCATCCGTGAGCTTAGCTAC

>1829

CATGCCTCCCAAGATGACCCCAAATGAAGTGTCCAGGGGAACCGTGATTTGACCCCTG  
CACCTGTCCCAGGTCTGCATCCTGATCACAGACGGGAAGTCCCAGGACCTGGTGGACA  
CAGCTGCCCAAAGGCTGAAGGGGC

>1830

AGGTCAGCTGGGGGGTGGGGGCAGTCAGAGAGCATGTGGGTGACTGAGTCCTGATGG  
GTCGTCACTTCAGGGATCAAGAATGCTGACCCTGAGGAGCTGAAGCGAGTTGCCTCAC  
AGCCCACCAGTGACTTCTTCTTCTT

>1831

CGACCCCAACCCTGCATCATAATGCCCCACCCCAATCCTCCTGCCTGATCCCCTGATCC  
CGCATTCCCAGCGGATGACTCGACCTCTGCTCCACGAGACCTGGTGCTGTCTGAGCCA  
AGCAGCCAATCCTTGAGAGTACA

>1832

GATGTCAGGAGTATAGGTGGTGGCTGGGGACTTGGCTGGGCAAGATAAAGTGACCTCT  
TGCCCTGGGCAGGTGAACGTCCCAGCTGGTGAGACCAGTGTGCGGCTGCGGGGTCTC  
CGGCCACTGACCGAGTACCAAGTGA

>1833

ACCTAACCCCCGACCCAGTACCCCTCCCACTTCTGACTCCATGAATCCCTGGTGGGA  
CTCTCCCCAGCTGCCCTAGAAGGGCCGGAAGTACCATCCAGAATACCACAGCCCAC  
AGCCTCCTGGTGGCCTGGCGGAG

>1834

CCGCGCCTCAGACAAGGCTGTAGAGTCCTGAGTCTGCAAGCCCACTGGCCCCCTTGGTG  
TCCCCCATGCAGGTGGGCCCACACAGCAGCAGGAGCTGGGCCCTGGGCAGGGTTCAG  
TGTTGCTGCGTGACTTGGAGCCTGG

>1835

TTTCTTCAGGCTGGGACGGGCAGGCAGGGCAAGGCCCGGAGGCCACTGACATCCCAT  
GTGCCCTGGGCAGACGCTTCTGTTGAGCAGACCCTGCGCCCGGTCATCCTGGGCCCCA  
CATCCATCCTCCTTCTCCTGGAAGT

>1836

TGCGGGGAAGGGATGGACAGGCAAGGGTCAGGGCATGGCCTCTGCTGGTCTGACCC

TGTTATCTTGCAGGCTTGGAGCCACCGCAGAAGGTGGTACTGCCCTCTGATGTGACCC  
GCTACCAGTTGGATGGGCTGCAGCC

>1837

TGGGCTGGGCCAGTGAGTGGGGGAGGTGTCGGAGCCCCAGGCTGCCTCTATGCTGTG  
CTCTCTCCAACAGGACCAGAGCTGCCTGTGAGCCCTGTAACAGACCTGCAAGCCACC  
GAGCTGCCCCGGGCAGCGGGTGCGAGT

>1838

CATCACTGCCATCGTCCCACATCCCTGTCTCTTTCTGACCCCTGCCACCTACCCTGACT  
TCTCTCTTAGGGGTGGAGCGGACCCTGGTGCTTCCTGGGAGTCAGACAGCATTGACT  
TGGATGACGTTTACAGGCTGGGCT

>1839

TGTGGAGGACAGCCTGCCTGCCTCACTCTGGTCCTGGTTCTGACTTCTGACTTCTGTCT  
GTAACCTCTAGAGCTGGAACTCCACTTGCTGTTCCAGGGCTGCGGGTTGTGGTGTCA  
GATGCAACGCGAGTGAGGGTGGC

>1840

GGGACCAATGAGGGTATGGGTGCCAGAGGGGACAGGCAGGAGCCATGCCAGCATTTC  
CCTCTGACCTCAGGTCCGGAGTCCAGCCAGACACTGCCCCCAGACTCTACTGCCACAG  
ACATCACAGGGCTGCAGCCTGGAAC

>1841

TTGCCCTATCAGATAGCCCCACTCCTTCCTGCCTGTTCCAGCAGACTCCCCATTGCCT  
CTCCCCACTAGACCCACTGGGCCAGTGAGGACGGTCCATGTGACTCAGGCCAGCAG  
CTCATCTGTCACCATTACCTGGAC

>1842

TGGGGGTTTACAGGTGGGGCTCTGGGGCACAGAGTTTGCTAGCCCTGGAGCTGCCTCCAT  
CCCTGTTCCCAGGCCCAGAGAAATCCAGTTGGTTTCTGGGGAGGCCACGGTGGCTGA  
GCTGGATGGACTGGAGCCAGATAC

>1843

CCCTGCGTAACCATTTCCTGCACTGCCTCTCTGTTCTCTACCAGGACCCCTTACCTTGCCT  
CTGTCCCCAGCCCCTGAGCCTGTGGGTCGTGTGTCGAGGCTGCAGATCCTCAATGCTT  
CCAGCGACGTTCTACGGATCAC

>1844

CTGACGCCACCCCTGTCCCTTCCTGGCTGGGACTGCTCACCCCTAACCATTGCTGTATGC  
CCACCTGCCAGGCGGCCCATGAGGCACCAGATACTCCAGGAAACACAGACTCTGC  
AGAGATCCGGGGTCTCGAAGGTGG

>1845

CCAGGGTGGGCCTGGGATTGGTGCAGGGGCATGGGGGCAGAGCTCCCTGATTCCTGA  
GCTTTCTCTCCAGCGCCTGAGGCTCCGCCAGCCCTGGGGACGCTTACGTGGTGCAGC  
GCGGGGAGCACTCGCTGAGGCTGCG

>1846

CAGGCCCTTTAATGCCCCCAGGTGTCACTATCCCACATGCTCTTGCCCCCACCCTCAC  
GCCTGCCCCAGGTGGCCAGGAACAGTCCCGGGTCTGGGGCCCGAGCTCAGCAGCTA  
TCACCTGGACGGGCTGGAGCCAGC

>1847

ATCTCAGATCTCTCCCTTCTGGGTTCTCAGGACTCAGCCTCTGATCCTCGATCTTTCATT



CCTCCTTCAGAGTCACCTCGTGTTCCTCAAGCATTGAACTACGTGTGGTGGACACCTCGAT  
CGACTCGGTGACTTTGGCCTG

>1848

CAGGATTTGGGTGGGCTGGCAGTTGGGGCTCTGTGGAGACAGCTTTTAAATCAAGTTC  
TGTCTCCTGCAGAAGTGCCTGGGTCCCCGCAGACACTTCCAGGGATCTCAAGCTCCCA  
GCGGGTGACAGGGCTAGAGCCTGG

>1849

ATAGTGGGAAGGGCAGAAAGGTGTGTCTGGGTGGGCTGCCCCGCTTCAGTAACTTGTTTC  
CCCTTCCTACAGTGTGCCCCGTGGCCTGGCGGATGTGGTGTTCCTACCACATGCCACT  
CAAGACAATGCTCACCGTGCGGA

>1850

CTCCAGGCTCTGTGCACCCCCATCCCTGCTCTGTTCCTCCTCAGGCTCTGTGTTTCC  
TTCCACCCCAGGTTGGCCTGCTGTCTTACAGTCATCGGCCTTCCCCACTGTTCCCACTG  
AATGGCTCCCATGACCTTGGA

>1851

AGGCATGGACTCCTGGGGCTATCCACTGGGAGCTTGGTGCCCCAGGGTTCTGACATGT  
CCTTCCTTCCAGGCACAGCCGTGGTCACAGCTCACAGATACATGTTGGCACCAAGATGC  
TCCTGGGCGCCGCCAGCACGTACC

>1852

ATGGGGAAGGGGTCTGGGAATAGGGGTGGCCCTGAAAAGGCTATCATGCAGCCACTG  
GACCCACCTTAGGGCTTAATGTGGTGATGTTGGGAATGGCTGGAGCGGACCCAGAGC  
AGCTGCGTCGCTTGGCGCCGGGTAT

>1853

GAGGCCCTCCAGCAAACCAGGGGCCTTGGGGGAGGGTCCCTTCCTGTCCTGACCTCT  
TCACCTCCTCAGGGCTTCCCTGGAGCAGATGGGCGTCCAGGCAGCCCTGGCCGCGCCG  
GGAATCCTGGGACCCCTGGAGCCC

>1854

TGTCTAGGGGCTTCTTCCAGCTCAAGGCCCCCATAGCCTGAATCCTGCCCCACTGCTCTC  
TGTCTTACAGGGGGCTCCCGGACAAGTCATCGGAGGTGAAGGACCTGGGCTTCCTGG  
GCGGAAAGGGGACCCTGGACCAT

>1855

GGGGACCAACACCAGGGGGGCGAGAGTGAGGTCTGTGGGGTTGCACCTTATACTTTG  
TCTCCTCCATCAGGGCCCCCTGGACCTCGTGGACCACTGGGGGACCCAGGACCCCGT  
GGCCCCCAGGGCTTCTTGAACAG

>1856

GGGGTCCCCTCCCCTTGAGAACTGCTTGCTTCGAGCGTCCTGCATCACCTCCCTCTTGC  
CTCCTCCACAGGGTGACTCAGGGCCTCCTGGAGAGAAGGGAGACCCTGGGCGGCCTG  
GCCCCCAGGACCTGTTGGCCCCC

>1857

AGTGTAGCGGGTCATAGGGGCACCTGCAAAATATTGGGAGGGTCTGTCTCAGGCCAGC  
TGCTCTTCTTAGGGGGCACCTGGAGTTCGGGGGCCTGTGGGTGAAAAGGGAGACCAG  
GGAGATCCTGGAGAGGATGGACGAA

>1858

CCCAGCAGGTTCTACCTTGGGCATGGCTTGGCTTCAAGGATGTTCTCAGCAAGCTTAT

CTCTGCCACAGGGAGAGCCTGGGGACCGCGGACAAGAGGGTCCTCGAGGGCCCAAG  
GGTGATCCTGGCCTCCCTGGAGCCC

>1859

TCAGGACATGAGCCTGGGTTATCAGATCCACCTCAGCCTTGGTGGCCTCTTACCACTCT  
ATTTTCCACAGGGTGACCGGGGTCCCCCTGGGCTGGATGGCCGGAGCGGACTGGATGG  
GAAACCAGGAGCCGCTGGGGCCCT

>1860

GACCCTGGGGAATATGACTCCACTCTTTTCTGAGGTCTCAGGGTGCTGATGCTGGCTGC  
ATCCTTCACAGGGTCGTGATGGCCCCAAGGGTGAGCGTGGAGCTCCTGGTATCCTTGG  
ACCCAGGGGCCTCCAGGCCTCC

>1861

CTAGTGGTGCCACAGGCATAGGGGCTGCGGCGACGCACCCCGCTCCTCTGACCTCTT  
GCTGTCCCTCAGGCATCTGCCCTGCGGGAGATCGTGGAGACCTGGGATGAGAGCTCTG  
GTAGCTTCCTGCCTGTGCCCCAAC

>1862

CAGTGGGTTGTGCCCCGTGGAGTGGGGTGTAGCTGTACAGCCACCAGCATTCTCTCTT  
CCACTCCTGCAGGGCCCCATCGGCTTTTCTGGAGAACGCGGGCTGAAGGGCGACCGT  
GGAGACCCTGGCCCTCAGGGGCCAC

>1863

TGGGGGTCAAGGGTTGGGCTCCAGGGGTCAAGGGTCGACAGGCAGCCCTGACAGAG  
CTCTTCCCTCTCAGGGGGAGACAGGGAAGCCGGGAGCCCCAGGTCGAGATGGTGCCA  
GTGGAAAAGATGGAGACAGAGGGAGCC

>1864

GGAGTTCTGATGAGAGTCCTGGGAGGGGTCTGCATTGACCATTCCCTCCCTTTGCTGT  
TTTTATTTACAGGGAGATCTGGGCCTCCCTGGCCTGCCCCGGTGCTCCTGGTGTTGTTGGG  
TTCCCGGGTCAGACAGGCCCTC

>1865

CTTGAGGGGGCAGAGGGTAGGAGGGTTCCCAAGTCACTCTCTGCCTCTCTTGCCCCTA  
TTTTTCTGGTAGGGTCTGGCAGGCCCCCAGGGAGAGAAGGAATCCCAGGACCCCTG  
GGGCCACCTGGACCACCGGGGTCAG

>1866

AGAGCTCAAACCTCCAGAGGGTGAGGGACCTTCAGCCCCCTTACCGTGACTTCTTACCC  
AAACCAACCCAGGGTGAACGAGGGCCTCGGGGCTTGATGGTGACAAAGGACCTCGG  
GGAGACAATGGGGACCCTGGTGACA

>1867

GGCTCGTTGTATTCTAAGCCCCCAGCCTGATCTGGTCCTGACTGAATCCCTCTCCTGGT  
CACTCCACAGGGCAGCAAGGGAGAGCCTGGTGACAAGGGCTCAGCCGGGTGCCA  
GGACTGCGTGGAATCCTGGGACCCC

>1868

CTATCCAGGGCGATTCTCTTTGGTCCCTCACTGACCTCCTCTGACCTCACATGGACCCT  
CTCCCTGCTAGGGATCCCCAGGAAAGGATGGAGTGCCTGGTATCCGAGGAGAAAAAG  
GAGATGTTGGCTTCATGGGTCCCC

>1869

AGCGAGGACTTTGGGAGAGGGGTCCATCTCTGGGGCCTCTGATTACTGACTCTGTCCT

ATATCTCCCCAGGGAACCCCAGGAATTGGGGGCTTCCCAGGCCCCAGTGGAATGATG  
GCTCTGCTGGTCCCCCAGGGCCAC

>1870

GGCCCCAACCTGCCTGACTCTGATCCCCACTGCCTCTGACCCTGCTCACTTGGTCCCT  
GTGTCTGACAGGGTGAGCGAGGTCCCCCGGAGAGAGAGTGGTGGGGGCTCCTGGGG  
TCCCTGGAGCTCCTGGCGAGAGAG

>1871

TCAGGGGGGTTGGCTGGGATGGCTGCCCATGGTGACTTCAGGGCCCTGAGGCCCCCTGC  
TCTTGGCTCCAGGACCCCTCCCTAGTTATGCTGCAGAACTGCCGGCTCCCAGCTCCAT  
GCTGTGCCTGTGCTCCGCGTCTC

>1872

AAATCAGTGCTGCCCCACCTTGCCCCGGGGCCAGCAGCCACTGCTCCCAGCACACCCTG  
CCCTACCTGCAGAGCGGGTACCCCTGAGGATGATGAGTACTCTGAATACTCCGAGTAT  
TCTGTGGAGGAGTACCAGGACCC

>1873

TGACCTCCCCCTGACCTTTCAACCCTCTCTGATTCCCACAAACCCTGCTGACTTGACCC  
CATTTGGCCCAGACCCCTGTTCCCTGCCACTGGATGAGGGCTCCTGCACTGCCTACACC  
CTGCGCTGGTACCATCGGGCTGT

>1874

GGTGCCTCTGCCTGAGCGTCTCCGGGGAAGGTCAGATGGCTGACGACCGTTTCCAACC  
TGTCTTACCAGGTACTGCCAGGACTGAGGCCAGATAATGAGCTGAGATTGAGCAT  
CCCCTGGAGGAGTCGGGGTCTCAG

>1875

GTGGGTACAGGTCTGAATGGAGAAGGGACCTGAGGGAGTGGGGCCTGGGCTGACTGG  
CTGCTCCTGGCAGGAGAACGGTGAGCTCTGCATGAATAGTGCCCAGTGTAAGAGCAAT  
TGCTGCCAGCATTCAAGTGCGCTGG

>1876

GTCAGGCAGGGACAAGTGATGTCCAAAGTATCTCCCCATAGCCTTGACTCCATTGGCT  
GTGTCTCTGCAGACGCTCTATGGGATTTACTACAAGTGTCCCTGTGAGCGTGGCCTGAC  
CTGTGAGGGAGACAAGACCATCG

>1877

ATCATTTCTGTTTGTAGTTTTTCTATCAGTCATTTGAGTCAGCGTCATAATTCACGTTATC  
TTCCTTTAGGTGGTGTTCCTACTGATGAAGAGCAGGCGACTGGGTTGGAGAGGGAGAT  
CATGCTGGCTGCAAAGAAGGG

>1878

AGGGCTTATTTGGCCTAATGGTTCAATTCTTGTTTTTTTTGTTTTGTTTTGTTTTGTTT  
TTTCTTCAGGACCCATACAATGTACTGGCCCCAAAGGGAGCTTCAGGCACCAGGGAAG  
ACCCTAATTTAGTCCCTCCA

>1879

AAAAGAAATTCATGTTGAAAGTCTCCCTTTCTAGGTTGGATGACCATAAACCACCTTTT  
TTCCCTTTTAGGTGAAGAGGACAATACCAGCGTCGTCTGGTTTTGGCTGCACAAAGGG  
CAGGCCAGCGATGCCCCCGCTG

>1880

GGCCGAAGAAGGTCAGGCCCTCAGCTGCCTTCATCAGTTCCACCCCTCCAGCCCCAC

CTCCTCCTGCAGACAAGCTGGTGTCTAGGAACTACCCGGACCTGTCCTTGGGAGACTA  
CTCCCTGCTCTGGAAAGCCCACAA

>1881

TGCCTCTCACAGTAGCCCCCGCCCTGCCCCTGCACAGCGGCCTGCTGAACTCACACT  
GTTTCTCCACAGCGCATGAGAGCCCCAGCCCGGCACCCCTGTGGCCATTGAGGAGGAAT  
TCTCTCTCCTCACCTGCAGCATCA

>1882

GTTGGGGATGAGTGAGGAAAGCCCGAGCCCAGGGAGGTCCTGGCCAGCCTCTAACTC  
CAGCCCCCTTCAGCATCTCCGGCTACGACATCCCTGAGGGCACAGTCATCATTCGGAAC  
CTCCAAGGCGCCACCTGGATGAG

>1883

GGCAGAAGAAGGTCAGGCCCTCGGCTTCCTTGGTCAGTTCCCACCCCTCCAGCCCCAG  
CTCCTCCTGCAGACAAGCTGGTGTCTAAACTACCCGGACCTGTCGTTGGTCTCTGCT  
CTGGAAAGCCCACAAGAAGCTCAC

>1884

CACCTCTCACAGTAGCCCCCGCCCTGCCCCTGCACAGCGGCCTGCTGAACTCACACT  
GTTTCTCCACAGCGCATGAGAGCCCCAGCCCGGCACCCCTGTGGCCATTGAGGAGGAAT  
TCTCTCTCCTCACCTGCAGCATCA

>1885

GGCCACCCCCAGCCCCCTCCCTGAGCCTCTCCTTGTCTGAACTGAAAGTACTCCATCC  
TTTCCTGGCAGGAGGACAACCTTAATGCCTGCCTATTACAAATGTATCCAGGAGGTGTTA  
AAAACCTGGAGCCACTGGTCCA

>1886

TGTGGGGGAGAGGCTGGGGTGGAGGGAGAGGCTCCTTCCCACAGCTGCATTCTCATG  
CTTCCTGCCGCAGTTCTTCCCCAATCCAGGTCTCCGGAGGCTGAAGCAGGCCATAGAG  
AAGAGGGACCACAAGAGAGAACAGC

>1887

TGGGCCTGTTGCCACTCTGTACTCCTCTCCCCAGGCCAGCCGCTCAGCCCGCTCCTTTC  
ACCCTCTGCAGGAGAGCCTGGTGGCAGGCCAGTGGAGGGACATGATGGACTACATGC  
TCCAAGGGGTGGCGCAGCTAGCAT

>1888

GCTGAGGGAGCGGCTGGAGGCTGGGCAGCTGTGGGCTGCTGGGGCAGGACTCCACCC  
GATCATTTCCCAGATTTCAGCAGCGACTGTGGAGGAGCTAGACCACGAACTGGGCCCCTG  
GTGCCTCCAGCTCCCGGGTCCCCTA

>1889

TCTCCCTTATCCCTCTCACTGCATTGCCCTGCTATGGGCCAGCTCACTTGGCCACCTG  
TCTCTTGCAGAGCCTGGTGAAATGGGAGAGTGAGAAATAAATGGTCTGTGAGCAGAA  
GCTCCTGAAGGGAGAGGGCCCCA

>1890

TCAACCTCCTCTCCAAAGCCACAGGACCCCAGGGGCCTCTCAGGCTAACAACCTACTT  
CTGTCCTTCCAGACCATGACGGCGGATGACGTTGTGTGCACCAGGGTCTACGTCCGAG  
AGTGAGTGGCCACAGGTAGAACCG

>1891

ACGTAAGTGAGGGGATAGATCTGTGTGATCTGAGAAACCTCTCACATTTGCTTGTTTTT

CTGGCTCACAGACATGTCGAGGAAGGCTTTTGTGTTTCCCAAAGAGTCGGATACTTCC  
TATGTATCCCTCAAAGCACCGTT

>1892

CTCCTGGAGCAGGGAGAGCGCTGGCCTCTTCCTCTCCGGCTCCCTCCATTGCCCTCCG  
GTTTCTCCCCAGGCTCCCGGACGTCCCTGCTCCTGGCTTTTGCCCTGCTCTGCCTGCCC  
TGGCTTCAAGAGGCTGGTGCCGT

>1893

AAGCAACAATGGGAGCTGGTCTCCAGCATAGAAACCAGCAGTCCTTCTTGGTGGGGG  
GTCCTTCTCCTAGGAAGAAACCTATATCCCAAAGGACCAGAAGTATTCATTCTGCATG  
ACTCCCAGACCTCCTTCTGCTTCT

>1894

AGGCGGGGATGGGGAGACCTGTGGTCAGGGCTCCCGGGCAGCACAGCCACTGCCGGT  
CCTTCCCCTGCAGAACTAGAGCTGCTCCGCATCTCCCTGCTGCTCATCGAGTCGTGGC  
TGGAGCCCGTGCGGTTCTTCAGGA

>1895

TGGATAAATGAGAGAGGGAGGGAAACAGTGCCCAAGCGCTTGGCCTCTCCTTCTCTTCC  
TTCACTTTGCAGAGGCTGGAAGACGGCAGCCGCCGACTGGGCAGATCCTCAAGCAG  
ACCTACAGCAAGTTTGACACAAACT

>1896

AGTGGTGGAGAGTTCTTGTACCACTGTGGGCACTTGGCCACTGCTCACCGACGAACGA  
CATTTTCCACAGGAGCCGACCTGCCTACAGACCCGCCTGGAGCTGTACAAGCAGGGCC  
TGCGGGGCAGCCTCACCAAGCTCA

>1897

CTGGTGCTTCCTTCCCCCACGTTACCCACTTGCCTGGACTCAAGTGTTTTTTATTTTTCT  
TTTTTTAAAGGAAACTTCCTGTGCAACCCAGATTATCACCTTTGAAAGTTTCAAAGAGA  
ACCTGAAGGACTTTCTGCTTG

>1898

GGAGCCACTAAGCAGGTGCCCACCCAGGAGATTCCATGGGTGCCCACAAGCAGACAG  
ACTTTTCTTCAGGGGAGATCATCGGGGGACATGAGGCCAAGCCCCACTCCCGCCCCT  
ACATGGCTTATCTTATGATCTGGGA

>1899

CTGCTCTTCACTGTCTCTGGGCTGTATACCCTGTGACTCCACCCCCATCCTCACTCTGCT  
CTCTCTGCAGCTCCATAAATGTCACCTTGGGGGGCCACAATATCAAAGAACAGGAGCC  
GACCCAGCAGTTTATCCCTGTG

>1900

GCCCCATCACTGTGTGCGGGGCCCAGAAGTTCGTTGGCTGACCTGGACTTTCTTGCCCTC  
TTCCCCCACCAGCTGGAGAGAAAGGCCAAGCGGACCAGAGCTGTGCAGCCCCCTCAGG  
CTACCTAGCAACAAGGCCCAGGTGA

>1901

GGGCTTGAGATGGAAGAGAGGGCAGGACCCGGAGGAGCATCAGCTCAGTCCTTCCAC  
TCTCTATTACAGGGGGACTCTGGAGGCCCTCTTGTGTGTAACAAGTGTGCCCAGGGC  
ATTGTCTCCTATGGACGAAACAATG

>1902

CTGCTCTTCACTGTCTCTGGGCTGTATACCCTGTGACTCCACCCCCATCCTCACTCTGCT

CTCTGTGCAGCTCCATAAATGTCACCTTGGGGGGCCCACAATATCAAAGAACAGGAGCC  
GACCCAGCAGTTTATCCCTGTG

>1903

GGAGCCACTAAGCAGGTGCCCACCCAGCAGATTCCATGGGTGCCCACAAGCAGACAG  
ACTTTTCCTTCAGGGGAGATCATCGGGGGACATGAGGCCAAGCCCCACTCCCGCCCCCT  
ACATGGCTTATCTTATGATCTGGGA

>1904

CTGCTCTTCACTGTCTCTGGGCTGTATACACTGTGACTCCACCCCCATCCTCACTCTGCT  
CTCTGTGCAGCTCCATAAATGTCACCTTGGGGGGCCCACAATATCAAGGAACAGGAGCC  
GACCCAGCAGTTTATCCCTGTG

>1905

AGCCCCATCACTGTGTCTGGGGGCCAGAAAGTTCGTTGGCTGACCTGGACTTTCTTGCCT  
CTTCCCCACCAGCTGGAGAGAAAGGCCAAGCGGACCAGAGCTGTGCAGCCCCCTCAGG  
CTACCTAGCAACAAGGCCCAGGTGA

>1906

GGGCTTGAGATGGAAGAGAGGGCAGGACCCGGAGGAGCATCAGCTCAGTCCTTCCAC  
TCTCTATTACAGGGGGACTCTGGAGGCCCTCTTGTGTGTAACAAGGTGGCCCAGGGC  
ATTGTCTCCTATGGACGAAACAATG

>1907

AAATGCAGGAATATAACATGTGGCAAACCTATCAGGAGTGTGAAATAACCGATGCATTCT  
TTCTTGTTTAGGCATCATCTGGGGAGAGGATACACTGATGGAGTATTTGGAGAATCCCA  
AGAAGTACATCCCTGGAACAAA

>1908

CAAATAGGACTAGGACCTGTAGTCTGGGGTGATCCTGGCTTGACAAGAGGGCCCTGACC  
CTCCCTCTGCAGTTGCGGCGCCGCTTCGGGGACGTGTTACGCCTGCAGCTGGCCTGGA  
CGCCGGTGGTCGTGCTCAATGGGC

>1909

GTTGGAGTGGGTGGTGGATGGTGGGGCTAATGCCTTCATGGCCACGCGCACGTGCCCCG  
TCCCACCCCCAGGGGTGTTCTGGCGCGCTATGGGCCCCGCTGGCGCGAGCAGAGGC  
GCTTCTCCGTGTCCACCTTGCGCAA

>1910

GGCACAAAGCGGGAACCTGGGAAGGCGGGGGACGGGGAAGGCGACCCCTTACCCGCA  
TCTCCCACCCCCAGGACGCCCCCTTTCGCCCCAACGGTCTCTTGACAAAGCCGTGAGC  
AACGTGATCGCCTCCCTCACCTGCGG

>1911

CAAATAGGACTAGGACCTGTAGTCTGGGGGGATCCTGGCTTGACAAGAGGGCCCTGACC  
CTCCCTCTGCAGTTGCGGCGCCGCTTCGGGGACGTGTTACGCCTGCAGCTGGCCTGGA  
CGCCGGTGGTCGTGCTCAATGGGC

>1912

GTTGGAGTGGGTGGTGGATGGTGGGGCTAATGCCTTCATGGCCACGCGCACGTGCCCCG  
TCCCACCCCCAGGGGTGTTCTGGCGCGCTATGGGCCCCGCTGGCGCGAGCAGAGGC  
GCTTCTCCGTCTCCACCTTGCGCAA

>1913

GCACAAAGCGGGAACCTGGGAAGGCGGGGGACGGGGAAGGCGACCCCTTACCCGCAT

CTCCCACCCCCAAGACGCCCCCTTTCGCCCCAACGGTCTCTTGGACAAAGCCGTGAGCA  
ACGTGATCGCCTCCCTCACCTGCGGG

>1914

TGGGGCCTGAGACTTGTCAGGTGAACGCAGAGCACAGGAGGGATTGAGACCCCGTT  
CTGTCTGGTGTAGGTGCTGAATGCTGTCCCCGTCTCCTGCATATCCCAGCGCTGGCTG  
GCAAGGTCCTACGCTTCCAAAAGG

>1915

CAGGTGCAGAATTGGAGGTCATTTGGGGGCTACCCCGTTCTGTCCCGAGTATGCTCTCG  
GCCCTGCTCAGGCCAAGGGGAACCTGAGAGCAGCTTCAATGATGAGAACCTGCGCAT  
AGTGGTGGCTGACCTGTTCTCTG

>1916

GAGGCAAGAAGGAGTGTGAGGGCCGGACCCCTGGGTGCTGACCCATTGTGGGGACG  
CATGTCTGTCCAGGCCGTGTCCAACAGGAGATCGACGACGTGATAGGGCAGGTGCGGC  
GACCAGAGATGGGTGACCAGGCTCA

>1917

TGTGTTTGGTGGCAGGGGTCCCAGCATCCTAGAGTCCAGTCCCCACTCTCACCTGCAT  
CTCCTGCCCAGGGAACGACACTCATCACCAACCTGTCATCGGTGCTGAAGGATGAGGC  
CGTCTGGGAGAAGCCCTTCCGCT

>1918

CCCTTCCGTGGAGTCTTGCAGGGGTATCACCCAGGAGCCAGGCTCACTGACGCCCCCTC  
CCCTCCCCACAGGCCGCGGTGCATGCCTCGGGGAGCCCCTGGCCCCGATGGAGCTCTT  
CCTCTTCTTCACCTCCCTGCTGCA

>1919

ATTGGGACTGCAGGGTGGGGCCACGAGGGACATGACCCCGTCCAGCAGGGCCTCCTG  
CTTGGCCCCACAGGTACAACCTTGGGAGGACCACGCATGGTGTGTGTGATGCTGCCGGA  
GGATGTGGAGAAGCTGCAACAGGTG

>1920

AGGATGGGATACGGGTCAGGGCCTGTGTCTTGCTGGGGCGGCCTCACAAGCTCTGCCC  
TGGCCTCTGTAGGAATGGGCCTGAATGGCGCTTCAACCGATTGCGGCTGAACCCAGAT  
GTGCTGTCGCCAAGGCCGTGCAG

>1921

GAAGGGAGTGTGGGGAGGCAGCCAGGAGGCCTGGGGCTGCCTTGTGCTCAGCAGTGC  
ATCCTCCCCGCAGCCAGCAACTTAGCTCTTTTTGGAGAGCGGCTGGGCCTGGTTGGCC  
ACAGCCCCAGTTCTGCCAGCCTGAA

>1922

GCAGGAGGAGGACACTGAAGGATGCTTCCCAGCACCAAGATCTGAGGGCTGTCCCCT  
GCTCCCTGGACAGGTGACAACTGTATCCAGAAAATCTACCAGGAACTGGCCTTCAACC  
GCCCTCAACACTACACAGGCATCGT

>1923

CCTGGGAGGGGTGTCCCGGGGGGCTGAGTCCTCCTGTGCAAGGTCTGACCCTGCAGAC  
ATGGCTTCTGTAGACAGCGTTTCCCTTGCTGATGACGCTCTTTGAGCTGGCTCGGAACC  
CCGACGTGCAGCAGATCCTGCGCC

>1924

GGAAGGGTGCTGAGAGCACAGGGAGCCCCATCCAGCTGAGGACCCTTTCTGTGGATG

CCCCACCTCCAGGCTCTACCCTGTGGGTCTGTTTTTGGAGCGAGTGGTGAGCTCAGA  
CTTGGTGCTTCAGAACTACCACATC

>1925

CCCCACACCCCTCGAGCTGAGAACCTCCCTCCCCAGTCATTCCCTGATCCCTGCTCTGC  
ACCGTCCGCAGACATTGGTACAGGTTTTCTCTACTCGCTGGGTGCGAATGCCGCCTTG  
TTCCCGAGGCCTGAGCGGTATA

>1926

GATGGGAGGAAGCTGCCCCAGGTCCATGGGCTACTGACCAGGCCAGATGGAAACCCA  
GCCTCTGTCCTAGGTGCTGAAGCACTTCCTGGTGGAGACACTAACTCAAGAGGACATA  
AAGATGGTCTACAGCTTCATATTGA

>1927

CAGGTGTGGCTTAGAGCCCCGCACCTCCTCGCCGCGCGCGGGCCTGACTTCTAGCCAC  
GGGTCTCCGCAGTTGGCCCAGCGCTTCGGGCGGGTGTTACGCTGTACGTGGGCTCGC  
AGCGCATGGTGGTGATGCACGGCT

>1928

GGCCCTCTGTAGCCCATTTCTCCCCAAAATGGGTATTTAGAATAACCTTCTGCTGGCCC  
CTCTGCCTTAGGAATCATTTTTAATAATGGACCTACCTGGAAGGACATCCGGCGGTTTT  
CCCTGACCACCCTCCGGAATA

>1929

TGGGTGACTGAGCAGGTGGAGGAGTCTCCTCACCCCCATCTTCTGGTTGCCCTGACTG  
CCTGTTTTGTAGGCCAGCCTTTCGACCCACCTTCCTCATCGGCTGCGCGCCCTGCAAC  
GTCATAGCCGACATCCTCTTCCG

>1930

TTGTTGGTCCAACACACACAATTATGTTGCATCCAGAAAAAAGTAGTAAAATATTTTTT  
TCCCTCTCTAGCTTTACAATAATTTTCCCAGCTTTCTACACTACTTGCCTGGAAGCCACA  
GAAAAGTCATAAAAAATGTGG

>1931

GGAGGTGGCTGGTTCTGTGCTGAAAGGAGACAAGCAGCCCCTTCTCTCCGGTCTGTCT  
CCGGTATCACAGGAAAAGCACAGTGCAGAGCGCTTGTACACAATGGACGGTATCACCG  
TGA CTGTGGCCGACCTGTTCTTTG

>1932

TGGATGATGGGTGGATGCCCAACTGGCCAGGAACCAATCCCTGAAATTTGTCCCATTC  
TATCTTGGCAGAGAAGCTCCATGAAGAAATTGACAGGGTGATTGGGCCAAGCCGAATC  
CCTGCCATCAAGGATAGGCAAGA

>1933

CTGGGGGTTTCCAGATGAAAGCCCACATTTTGTTAACATGACTCACTGAGACAGTCTTT  
GTTTCTCCTAGGGCACAGTCGTAGTGCCAACTCTGGACTCTGTTTTGTATGACAACCA  
GAATTTCTGATCCAGAAAAGT

>1934

GTCTCACTGTTAACAGTGTGCTGTCTGAAACTCCCTCAGTGTCTCATCAATACCATT  
GTTACTTCTAGGAAAACGAGTGTGTGCTGGAGAAGGCCTGGCTCGCATGGAGTTGTTT  
CTTTTGTTGTGTGCCATTTTGCA

>1935

AGTTAGTCTGGCTGTGCTTGTCCTTTTTCCCACCTCCCTCGCTGTGCCTGACCCTCTCTT



CTTTCCACAGGTTCTCAGGCAAGAGCCACCTGCTATTGCCGAACCGGCCGTTGTGCTA  
CCCGTGAGTCCCTCTCCGGGGT

>1936

TGGCCTCTCGCGTTTGCTCTGCCCCACCTGGGTGCGGAGACCATGTCCTTCTCGCTTG  
GCCTCTCCCAGGACGTGGATGCAGCTACTCTAGCTCGCATTGACCTGGAGCGCAGAAT  
TGAATCTCTCAACGAGGAGATCG

>1937

GGCTGGGAATAGGGGTGTGAGGGTCGTGTGTGGGCCCTGAGAGGGACTGAAGCCCAG  
TCATGCCCTACAGGAGATCCGTGAGTTGCAGGCTCAGCTTCAGGAACAGCAGGTCCAG  
GTGGAGATGGACATGTCTAAGCCAG

>1938

ATGCTCCCAAGCTCATCCCTACCCGTGCCCTGCATCCTTCTCATTTTTGGGCCCTTTCT  
CTGCCCTTAGGTGTCAGACCTGACCCAGGCAGCCAACAAGAACAACGACGCCCTGCG  
CCAGGCCAAGCAGGAGATGATGG

>1939

GCCCCAAAGCTTTCTTTGGGCTGCTAGTGTCTCTTCCCTTCCTTGACCTGGGTTCCCC  
CTCTCCTGCAGAACGATTCCCTGATGAGGCAGATGCGGGAATTGGAGGACCGATTGTC  
CAGTGAGGCCAGTGGCTACCAGG

>1940

GGACTCCCAGCCCCCTGGTATAGCCCAGCCTGGACTTGGTCAGGCTGAGTGTGCGATGG  
ACCCTGTTACAGAAACCAGCCCTGAGCAAAGGGGTCTGAGGTCCATACCAAGAAGA  
CGGTGATGATCAAGACCATCGAGAC

>1941

TGCGATCCTGGGTGGGATGCCTAGGCTGACGTCATCCTGCTAGCACATGTGACTGGACT  
CCTCTCCCCAGGTCGTCAGTGAGGCCACACAGCAGCAGCATGAAGTGCTCTAAAGAC  
GAGAGACCCTCTGCCACCAGAGAC

>1942

TTGCTGCTTGTGCCCCGAACTAACTCTCAGGCACATTAGTCAGAAAATATTACGTTTGGT  
TGCTCCCCGAGGTTCCATAAAAGTAAAGCTCTAGAGGCCGTCAAATTGGCAATAGAAGC  
CGGGTACCACCATATTGATTCTG

>1943

TACCTCAGAGCATGGCTATGTGTGGAGAAATTGACTTGTGACATCACTAAACTGACTGC  
TTCTACTTCAGCCAGGTGAGGAAGTGATCCCCAAAAGATGAAAATGGAAAAATACTATT  
TGACACAGTGGATCTCTGTGCCA

>1944

AGTTCTATGTTACATTTATCTTGCTCTTCAGTCGACTACACAAATGATACCTCACAATTC  
CTTTTCCAGGCCATGGAGAAGTGTAAGATGCAGGATTGGCCAAGTCCATCGGGGTG  
TCCAAC TTCAACCACAGGCTGC

>1945

TACTTTGGTGATTTTAATATTAATGTAAC TTTTGGATTATCTGATGCTTTTCCATCTTGCTC  
GTCTGCAGGTGGAATGTCATCCTTACTTCAACCAGAGAAA ACTGCTGGATTCTGCAA  
GTCAAAGACATTGTTCTGG

>1946

CTGTTAGGGAGCCGCCTAACAAACTGTATCCCCAGCCTCAGGGCCTCAGCCTTTCTGC

CTTTCCTTCCAGGGTGGACCCGAACCTCCCGGTGCTCTTGGAGGACCCAGTCCTTTGT  
GCCTTGGCAAAAAAGCACAAAGCGA

>1947

TGAACTTGGTTGTTCCCAATTGGCAATGATGTAATCTAAAAATAATTAAAGTTCCTATT  
ACTGTGATAGGTGTTTGAATTCAGTTGACTTCAGAGGAGATGAAAGCCATAGATGGC  
CTAAACAGAAATGTGCGATATT

>1948

ATCACTGCGCTACCGGCTAGTAACGGAGTCATTGCCATTTCAGAGTGTGCATTTTTTTTTTC  
CTCTTTCCAGTTTTGCTGGCCCCCTAATTATCCGATTTCTGATGAATATTAACATGGAG  
GGCATTGCATGAGGTCTGCC

>1949

TGCTTGCTTTCCTCCAGACTTTGAGCCCTGGCCTGATGTAGACCTTTTTTGCTCTCTCCTC  
CTTCGTATAGGTACGGTTCCTGGAGCAGCAGAACAAGATGCTGGAGACCAAGTGGAGC  
CTCCTGCAGCAGCAGAAGACGG

>1950

ACCTTGGGAGCCCCTTGGTTGGGGTTGGGTGTGGAAACCCAGCTCAGGCTCCCCTCTC  
CTCATCCCCCAGGATGTGGATGAAGCTTACATGAACAAGGTAGAGCTGGAGTCTCGCC  
TGGAAGGGCTGACCGACGAGATCA

>1951

AAGGCTGTTGTGGAAGGGGGCTCCTGTGTGCAGAGACAGGGCCTCACCCTTGCC  
CTCTTCCCCACAGGAGATCCGGGAGCTGCAGTCCCAGATCTCGGACACATCTGTGGTG  
CTGTCCATGGACAACAGCCGCTCCC

>1952

GAGGGTGGACGCACGGAGGAAGAGAAGGCATACCCAACCTGACCTACTTACCTGTCC  
CCTACCCACAGAGAGGGCTTCCCTGGAGGGCCGCCATTGCAGATGCCGAGCAGCGTGG  
AGAGCTGGCCATTAAGGATGCCAACG

>1953

CAGGGAGAAGGGCATGGAGCCTGCCATGGTGGGCTTCTGTACTCATGTGGCTACCTCT  
GTCCCTCACCAGGTGGTCTGAGCTCGGCCTATGGGGGCTCACAAGCCGGCCTCAGCTA  
CAGCCTGGGCTCCAGCTTTGGCTC

>1954

GCCCAGCCAGGCCCTTTCTGGCCGTGTGGCTCAGGAACACAGCCTCTTCCTCTTTTTTT  
TCCCCTCCTAGCCCTATTCAGGCAGGAGCTGCTCTTCTGGGGTATCGCGATCCACTTAA  
GGATGAGGCAGACTTGGTGACA

>1955

ATCTCGGGAGGTCACTGGGAGGCTGGTGCTGGGCAGCAGCTAGTGCCACTTCCTCTGT  
CCCATATTTTCAGCGCCTCCAGAGCCAGAACTGAGCCAGTGAGAGCGCACCCCTGGGGC  
AGCCTGGATTCTTGGGGTGTCCCC

>1956

CCCCTGGGCCCCACTGCCTCCTCTCAGGGCAGTTGGCACTGAGTCAGGCTGGCCTTCCT  
GATGTCCCACAGATACTGGCTCGCTGTGACATCATGGTGCTGCAGGAGGTGGTGACT  
CTTCCGGCAGCGCCATCCCGCTCC

>1957

TTCTGTGGGTCTAATCAGGGGCACACCCAGAGGCTTGAGGCCCTGACCCCGCCTCCCC

TTTTCTTGGCAGATTTGATGGCTCTGGGCCCTACAGCACCTGAGCAGCCCCAGCTG  
GGGCGCAGCACCTACATGGAGACG

>1958

CGCCGTTTGGCACTTGCAAGCCAAAATCAAAGACGTGGGGCCACTGCTGCCCATCCCT  
TTGTCCTCCCAGGTCACACAAAACACAGGTCCTGAGTTCCTACGTGTACAACGATGAG  
GATGACGTCTTTGCCCGGGAGCCA

>1959

CCTCACCCAGACGGGCTAGGGGGAGAAGGTCCAGGAGTGGATGGCAGCCCTCGGTCC  
CTGGGCCTTGCAAGTCCTTCCCAGCCTGGTGTTGGTCCCGCTGCACACCACTCCTAAGG  
CCGTAGAGAAGGAGCTGAACGCCCT

>1960

GGGCAGTTTGTACAGGAGGGACAAGGATAGGGTGGCCCAGCGGCCAGCCTGATGGCT  
GCTGTGTCTCTAGGACGTGATCCTGCTTGGGGACTTCAATGCTGACTGCGCTTCACTGA  
CCAAAAAGCGCCTGGACAAGCTGG

>1961

GGGCAGCAGCAGGGTCACAGGGAAGCCCCTCGGCCCCGGGCACTGACACTGCCCCAC  
CACCCATTCCCAGGCCCTCAACATCAGTGACCACTACCCCGTGGAGGTGGAGCTGAAG  
CTGAGCCAGGCGCACAGCGTCCAGC

>1962

TATTCCTGCTTCCACAGCGGCAGACCAGCCAGTTGCAGGCACCAAGCCTTTGGGCAT  
GTTTCCTTCTAGGTCGGCGCCTGCATCGTGAATTCAGAAAACAAGATTGTCGGGATTGG  
GTACAATGGGATGCCAAATGGGT

>1963

GTGTTAACTTAGTAAATTCTTCATGAGCTGCAACCAAAGTTTTTCTTTTCCCTTT  
CAACCCACAGTGTGCCATGCGGAGCTGAATGCCATCATGAACAAAAATTCGACCGATG  
TGAAAGGCTGTAGTATGTATGT

>1964

CTCGTTCCGCCTGTCTTTTGCAGCATCTGTAGGTGCGTACACTAAGGGAGCTCCCATTG  
TTACCTTACAGGTATAAAAGAAGTGATTTTCATGTCTGATAAATACCATGATAGTGACGA  
GGCAACTGCTGCGAGGCTCCT

>1965

GTAAAGCCAAAGTAAACAAATTGCTTTCACTACTCACCAGATAATAATTGTATTTTGTTT  
TTATTTTTAGGAAATTCATACCGAAGTGCAGCAAGATTGTCATTGACTTTGATTCAATTA  
ACAGCAGACCGAGTCAAAAG

>1966

TTTAATTAAAGAAAAATATTA AAAAGGAAAAATGAACTACTTATGATTTTCTTTTTTGCA  
TTTTTCCTAGAGGATGACTTG GTTACAGTCAAAACCCAGCGTTTGCAGAATCTGTCAC  
AGAGGGAGATGTCAGGTGGGA

>1967

GATTCTATACAGCTAATTTTCTAATGCTGGATAAACATTTGGACTTCCTCCATCTGTCTTC  
CTCTTCCAGACATCTGTGCAGGTTCCATCACCAGCAAATGGCGTGATTGAAGCTCTTTT  
GGTACCTGATGGGGGAAAAG

>1968

CCACTAAATTTTGCTTGGTTGCTTCTCATTTCAGACAGTGCCAGTGGCATATACTTTTCT

TGTTTTTCAGCTGCTCCTGCTAAGGCCAAGCCGGCTGAAGCTCCTGCTGCTGCAGCCC  
CAAAAGCAGAACCTACAGCAGC

>1969

AGCACTGGCACAAACTCAGCAGATGTTTCTTTCTTGTCTGATGCAGCTTTATCCTCTT  
TTCATTTTCAGTGTCTGCAGTAAAACCCACTGTTGCCCCACCACTAGCTGACGCAGGA  
GCTGGCAAAGGTCTGCGTTCAGA

>1970

TCTGACTACACGGGGAATGCTTGACCCAGAGAGATCAGATTGTCAATGCTTGTTCCACT  
CTTACTTTTCAGGAGAAAATGAACAGGATGCGGCAACGCATTGCTCAGCGTCTGAAGGA  
GGCCCAGAATACATGTGCAATGC

>1971

GGATTGAGAAACCTGCTGTGAAAGTCAAATGCAGGCTTTGTGGTCAGTTTGTTTTGT  
AATGTTTCACAGTAACATCCAGGAGATGAGGGCTCGGCACAAAGAGGCTTTTTTGAAG  
AAACATAACCTCAAACCTAGGCTTC

>1972

TGCACATATTACCTCATTAGTCTTGGCCTTCCTGGGGAGTTGTATGTAACATGTATTTTCT  
CTCTCATAGTGATTGACGACACAACCAAAGAGGTGGTGTATACGGATTATATTGACATC  
AGTGTTGCAGTGGCCACCCC

>1973

TTCAAGGGAGTTGTAACTATAAAAGGTACTATTAATTTGCAACTGAAAACAGCTTTTC  
ACCCCTTCAGGGTCTGGTGGTTCCAGTCATCAGGAATGTGGAAGCTATGAATTTTGCA  
GATATTGAACGGACCATCACTG

>1974

GGATTATGGACTGACTTTAGGTGAAGGAAACTGGGGTGGCTTAATATTTCAATTATGAA  
ATCTGTTTTAGGCCCGAAAGAATGAACTTGCCATTGAAGATATGGATGGTGGTACCTTC  
ACCATTAGCAATGGAGGCGTTT

>1975

GCTAAATCTCCTTCAGCGAGGCTGGCTGTGGCTTGCTGGAGACAAACCTATTTACCTTT  
CCTCTCTGTAGGTAGAGGTGCGGCCCATGATGTACGTGGCACTGACCTATGATCACCGG  
CTGATTGATGGCAGAGAGGCTG

>1976

CCTAGCCCTATGCAGCCCCACAGTGGGACCCTTGTCATGGACCTCAACCATCAGAATCTT  
TTCTTTTGCAGGTCGTTACTCTCTGACCTATATCTACACTGGGCTGTCCAAGCATGTTGA  
AGACGTCCCCGCGTTTCAGGC

>1977

GACTAAGAGTTATTTTGATAAATTTCTCACCAGGCTGACTGTCTCTCTGTGGGGTCGGG  
GGAGTTTTTCAGGGTCTCACGTATTGCAGGGAAGGTTTGGTTGTGAGATCGAGAATAAC  
AGAAGCAGCGGAGCATTCTGGAA

>1978

GGGTAGGAAGAGACCTGGGCCGGGAGAAGTCCACCTCAAGCCTGCAGTGTCACTC  
TATCCCTCCACAGATCCTCCCTCTGTGGTGGTCACCAGCCACCAGGCCCCAGGAGAAA  
AGAAGAAACTGAAGTGCCTGGCCTA

>1979

GGGAGAGAAGGGAGGAGCCCTTGGAGGCTAGAAGGGAAGTCAGATCTTCCTCCTCTC

CCAAAACCTCCAGTGTATGCCACGTTGAGGGACCTGAAAACACAGGGCCGGCTGTGG  
GAGGCGGCCCCGGGCCCTGGCATGCCC

>1980

GGAGCACGAGGGGACAGGCCGTGCTGAGGGTGATGCTGAGGCGGGCTGGTCGGGCCT  
CTTGTCTCCGCAGTGTGTAACGCAGGCCTGGGCCTGCTGGGGCCGCTGGAGGCGCTGG  
GGAGGACGCCGTGGCCTCTGTGCT

>1981

GAGGGGCACCGTCTGCCCCGGGGATGACCCCTGGCCGCTGCGCCTCAGGAACCTCGT  
CTCCCCACCTAAGGGCTGCCTTTCAATGACGTTTATTGCGCCAGCAAGTTCGCGCTCGA  
AGGCTTATGCGAGAGTCTGGCGGT

>1982

TGGGGTTGGGGCTGGGACTGGGGCCTGGCTGGCGTCCGCCCCCTCCCACTCGTTGCTC  
TCCGGCCAGCAGCTTGAGCCTGATCGAGTGGCGCCAGTGCACACCGCCTTCATGGAG  
AAGGTGTTGGGCAGCCCAGAGGAG

>1983

ACTCCAGGAGTGGGGGCGGTGCGTCCTCCGGCCGGCAGCGGTGGCCACAGCTCTCCT  
CCCGCCGCCGAGGTCTTCCTACCGCTTTGCGCGCCCCGAAGCCGACCCTGCGCTAC  
TTCACCACCGAGCGCTTCCTGCCCC

>1984

TACTGTGATCCAGCATGTCTCTCGGCGTTTGAGGAGACATCCCCCACTGACCTGCTCTT  
TCTCTCCCCAGCAGTCTTAGGCGCTGAGCTCAGCGCGGTGGGTGAGAACGGCGGGGA  
GAAACCCACTCCCAGTCCACCCTG

>1985

GTGTGTCCATGTGTCAATTTAAAGACTATTAATTACACTAATATAGTTTCTTTCTCTCTT  
GGATAATAGGCACGTTGTTCCGTATGGACTTGGAAGCCCTAGGTCCAAGAGAGCCTTG  
GAGAATTTACTTCCCACAAAG

>1986

TACATGTTTCTTTTGCCAAAGGGTGATTTTTTTAAAATAACATTTGTTTTCTCTTATCTTG  
CTTTATTAGGTCGGAGACCATGAGAAACAGCGTCAAATCATCTTTTCATGATCCCAAGC  
TGAAAGGCAAGCCCTCCAGA

>1987

GCTGGGGACAAGGAAATTGAAGCTGGAGTTTGTGTTTTAGTAACCAAGTAACGACTCT  
TAATCCTTACAGATGGGAAAGGGCTCCTTCAAGTATGCCTGGGTCTTGGATAAACTGAA  
AGCTGAGCGTGAACGTGGTATCA

>1988

AAGGCTTGCTTTGTACACTGGTTTTGTCAATTTGGAGAGTTGACAGGGATATGTCTTTGC  
TTTCTTTAAAGGCTGACTGTGCTGTCTGATTGTTGCTGCTGGTGTTGGTGAATTTGAA  
GCTGGTATCTCCAAGAATGGGC

>1989

AAGACCATTGTTAAAAAGCTCTGGGAATGGCGATTCATGCTTACACAAATTGGCATGC  
TTGTGTTTCAGATGCCTTGGTTCAAGGGATGGAAAGTCACCCGTAAGGATGGCAATGC  
CAGTGAACCACGCTGCTTGAGG

>1990

AAAGTTGAATTTGAGTTGATAGAGTACTGTCTGCCTTCATAGGTATTTAGTATGCTGTAA

ATATTTTATAGGTATTGGTACTGTTCCCTGTTGGCCGAGTGGAGACTGGTGTCTCAAACC  
CGGTATGGTGGTCACCTTTGC

>1991

TTAACTTATTGCAGAGGCTAAAGTCATTTGAGACTTTGGATTTGCACTGAATGCAAATC  
TTTTTTCCAAGGTGATTATCCTGAACCATCCAGGCCAAATAAGCGCCGGCTATGCCCCCT  
GTATTGGATTGCCACACGGCTC

>1992

AAAGTTGTGTTAAAGATGAAAAATACAACTGAACAGTACTTTGGGTAATAATTAACCTTT  
TTTTTTAATAGGTCGCTTTGCTGTTCGTGATATGAGACAGACAGTTGCGGTGGGTGTCA  
TCAAAGCAGTGGACAAGAAGGC

>1993

GCTGTCTGTGGTTCTGGGGAGGAACAAGGGGAGATGTGAAGGAAGGACACTTAGCTA  
TCCTCCCTGCCAGGGTCTGAGACTTCCACCTTTGAGACCCCTTTGGGTGCTAAGACGC  
TGCCTGAGGATGAGGAGACACCAGA

>1994

GGGACTCAAGACCCATGTGAATTCATGTAGGAAGGATGCTCCATTCTTTGTCTTTTATC  
CTGCCCTGTAGTTTACTTGCCGGAGGTGCTACAGGGGCAACCTGGTTTCCATCCACAA  
CTTCAATATTAATTATCGAATCC

>1995

GATACGGGGCCAGGTCTGCTTCTCTGCCTTCCCTCTGCCCCATCCCTTCTTCCCCTCTTG  
CTTTCTCCAGGGTCGCTGCAGACGCTTTCAGTGGGTTGACGGCAGCCGCTGGAACCTT  
GCGTACTGGGCTGCTCACCAGC

>1996

GGGGTCGCTGCGTTCCAGGGAACTCTCCCAGCAACCTGCCCTATAAAGGGTGTCTCTC  
TTTCTTCCCCAGCTGGTCCTGCCGCTGCTGTGTTGAGAGAGCTGCGTTGCGTTTGTTTA  
CAGACCACGCAAGGAGTTCATCC

>1997

AGAGAAATCCCGCAGCCTGGGTCTTCAACCTTGGTATCTCATGAGTGTATCTTCTTTTT  
CTTTCCTTCAGAGCCTCCCTGAAGAACGGGAAGGAAATTTGTCTTGATCCAGAAGCCC  
CTTTTCTAAAGAAAGTCATCCAG

>1998

AAGGAAGCTGTCCTTCCACAGCCACCCTTCTCCCTCCCCGCCTGACTCTCAGCCTGGC  
TATCTGTTCTAGAATGTCTGCCTGGCTGTGGCTTCTCCTGTCCCTGCTGTGCTCCCTC  
TGGGCCTCCCAGTCCTGGGCGC

>1999

ATCCTACGGCCTGTGGGCCAGGGCCAGAGCCTTCAGGGACCCTTGACTCCCCGGGCTG  
TGTGCATTTTCAGACGGGCTGTGCTGAACACTGCAGCTTGAATGAGAATATCACTGTCCC  
AGACACCAAAGTTAATTTCTATG

>2000

TGGGGCTGCTGAGGGGCAGGAGGGAGAGGGTGACATGGGTCAGCTGACTCCCAGAGT  
CCACTCCCTGTAGGTCGGGCAGCAGGCCGTAGAAGTCTGGCAGGGCCTGGCCCTGCT  
GTCGGAAGCTGTCCTGCGGGGCCAGG

>2001

AGTACAGGAACTGTCCGTATTCCTTCCCTTTCTGTGGCACTGCAGCGACCTCCTGTTTT

CTCCTTGGCAGAAGGAAGCCATCTCCCCCTCCAGATGCGGCCTCAGCTGCTCCACTCCG  
ACAATCACTGCTGACACTTTCC

>2002

TTCCTTCATAAAGACCCAACCCTATGACTTTAACTTCTTACAGCTACCACAGCCCCTGG  
GCCCCGAACAGTTGTTACAGGTTCTGGTCATGCAAGCTCTACCCCAGGTGGAGAAAAG  
GAGACTTCGGCTACCCAGAGAAG

>2003

GAGACATTGAAAGTCAGGGTAAAGCTGAATATAACATTGCTGAAATGTTTTTCCTTGTG  
TATTTTAACAGGGCTGAAGACATTATGGAGAAAGACTGGAATAATCATAAGAAAGGAA  
AAGACTGTTCCAAGCTTGGGAAA

>2004

CATAACTTGAAAAATAAACACTTCCTATGGGATTTGACTTTATTTTCTCCATTGTCTTA  
CCTTTTACAGGTGTTAATATAGTGAAAAGGAAGCTTGCAGCTCATGACAATTTGAAGCT  
GACAATTACACAAGAAGGAAA

>2005

CATGTGTAAGACCCTAATAAATGCCATTATTATTATTATTATTATTATTATTATTATTATT  
ATGTAGGGGACCTGGAGCCTTGAGGGAAATAAACTTATTGGAAAATTCAAACGGACAG  
ACAATGGAAACGAACTGA

>2006

CCCTTCTCTCCTCTGAGTACCAGATCCTCCCTGATACCCCCGACCCCATGGGCATCCTCT  
ATCCCCTCAGCGGCCCTGGGAGAGCCTCAGCTCTGCTATATCCTGGATGCCATCCTGTT  
TCTGTATGGAATTGTCCTCAC

>2007

TAAGAGATGTAAAATTTTCATGATGTTTTCTTTTTTGCTAAAACTAAAGAATTATTCTTTT  
ACATTTTCAGTTTTTTCTTGATCATGAAAACGCCAACAAAATTCTGAATCGGCCAAAGAG  
GTATAATTCAGGTAAATTGGA

>2008

TATCTACAGGGGAGGACCGGGCATTCTAAGCAGTTTACGTGCCAATTCAATTTCTTAAC  
CTATCTCAAAGATGGAGATCAGTGTGAGTCCAATCCATGTTTAAATGGCGGCAGTTGCA  
AGGATGACATTAATTCCTATGA

>2009

CAGTAGTTCATGTACTTTTTAGAAATGCATGTAAATGATGCTGTTACTGTCTATTTTGC  
TTCTTTTAGATGTAACATGTAACATTAAGAATGGCAGATGCGAGCAGTTTTGTAAAAAT  
AGTGCTGATAACAAGGTGGT

>2010

ATTTTTGTAATACATGTTCCATTTGCCAATGAGAAATATCAGGTTACTAATTTTTCTTCTA  
TTTTTCTAGTGCCATTTCCATGTGGAAGAGTTTCTGTTTCACAACTTCTAAGCTCACC  
CGTGCTGAGGCTGTTTTTCC

>2011

CAGCACACATATTTATTTTTTTCTAGATCAAATGTATTATGCAGTAAGAGTCTTAATTTTG  
TTTTACAGGTTGTTTTGAATGGTAAAGTTGATGCATTCTGTGGAGGCTCTATCGTTAAT  
GAAAAATGGATTGTAAGT

>2012

AGTAGTCACTTAGAAAATCTGTGTATGTGAAATACTGTTTGTGACTTAAAATGAAATTTA

TTTTTAATAGGTGAACATAATATTGAGGAGACAGAACATACAGAGCAAAAGCGAAATG  
TGATTCGAATTATTCCTCACCA

>2013

TGGGAACTCGCCCCACCTGTGTCCGGAACCTGCTCGCTCACGTCGGCTTTCCCCTTCT  
GTTTTGTTCTAGGACTTCTGCACGGACCTGGCCGTCTCCAGTGCCAACTTCATTCCCAC  
GGTCACTGCCATCTCGACCAGTC

>2014

TGGGGTGGGTGAATGGAGGTGATGGCAGACACTTTTACTGAATGTCGGTCTTTTTTTGT  
GATTATTCTAGTTATCTCCAGAAGAAGAAGAGAAAAGGAGAATCCGAAGGGAAAGGA  
ATAAGATGGCTGCAGCCAAATGCC

>2015

TTGGAGATTGAGCATAAGGGCCCTTGAGTAAGACTGTGTCTTATGCTTTCCTTTATCCCT  
CTGTATACAGGAGACAGACCAACTAGAAGATGAGAAGTCTGCTTTGCAGACCGAGATT  
GCCAACCTGCTGAAGGAGAAGG

>2016

GAAATGAGGGGGTGGGGAAATGGTACGGAGGTTTCATAACTGAGGAAATGACCACGAC  
TGCACTATTTTCAGGAGCAGACAAGATGGAGACAAATTCCTCTCTCCCCACGAACATCT  
CTGGAGGGACACCTGCTGTATCTGC

>2017

CATAGTCAGCCTGTATTCTATACTCATTAGTGCATTACCAGTTTGTTTCATTCCCTTTTGT  
TTTCTGCAGATAACAATGCTGGGAATTCAAGGAGATCTGAAGTGGTCCACAGATCCAG  
ATAAAGGTCTCTTCATCTCTC

>2018

CAGGGATCAGAAGCTGCCTGGCCTTTTCTTCTGAGCTGTGACTTGGGCTTATTCTCTCC  
TTTCTCCGCAGTTGCTGCTGACACGCCGACCGCCTGCTGCTTCAGCTACACCTCCCGA  
CAGATTCCACAGAATTTCATAGC

>2019

AGGGCCATGGTGGGCCCAGGATTCCCCGGCTGGATTCCCCAGTGCTTAACTCTTCCTCC  
CTTCTCCACAGCTTCCTAACCAAGAGAGGCCGGCAGGTCTGTGCTGACCCCAGTGAGG  
AGTGGGTCCAGAAATACGTCAGT

>2020

CTCTAGTTCCCTGCAGCTGGGGTGGGGCGTGCCTGCATTTTCAGGTGCCTTAACCGAC  
CCATTTCCGCAGAGCCTCCTGTGCTGAGCCCTGACGTGCCCCTGCCATCCGACCATG  
GAGGGACTGAGTCCAGCCCAGGCT

>2021

AAGCGTTCAGCTGCAGTAGCATATTCAAGTGTTGCTAGTTAGTAATTATCTTTTTAATTT  
TTTGTTTTAGTTTAAAAGATTGGAAGACCCGTTTGAGCTACTTCTTACAAAATTCTCTA  
CTCCTGGGAAGCCCAAAACC

>2022

GGAGAAACATAAGGAATCATTTGGTCTCTCAGTTCTTCACATTCTGCATGCTCTTTTCTC  
CCCCCTTCAGATGGTCTTGCTGCATTCAGGGCTTTTTTAAAGTCGGAATTCTGTGAAGA  
AAATATTGAATTCTGGCTGGC

>2023

TGTTTTCAAATACTAAATTTTAATCTTTAACTCTGAATACCAAATAAACAACCTTTTTTGTT



TTATTTTCAGATAAACATAGATTTTCAAACCAAAACTCTGATTGCCCAGAATATACAAGA  
AGCTACAAGTGGCTGCTTTA

>2024

GAGGCAGTGTCATTGGAGAGGCTTACTCCAGCTGGCGGAAGCCTCACGTACTGCTTGT  
CTCTCCTGCCAGGCTCTGGAGCTCATGACGGTGCTGGTGGGCAGCCCCGCAAGGATG  
GGCTGGTGTCTCTCCTCACCACCT

>2025

GACACCTGCCCTTCCTGTCCAATCCTCCCAGGCAGCCTCTCTTACCATCACCTGTTCTT  
TCCCCCTGCAGCTGCCCCCTCCTGGCTTCAGTGCAGTGGTGGTCAGCTCAGTGCCC  
CTGGGGGGTGGCCTGTCCAGCTC

>2026

CCCTGGAGTGTCATTGAAGCCACTGCTGCTTCCACCAGCCCTAGCCTCCCCACCTCAC  
CCTGTACTGCAGACTCGGGCACAATAGCTGCCCCGCGCCAGGTGTGTCAGCAGGCCGA  
GCACAGCTTCGCAGGGATGCCCTG

>2027

TGTGCCCACTGCCTGGCGCAGCAAGCACACGCTTGGCCTCGTCATCTCCCCATTGTA  
ACTCCACCCCAGGTCTTGGAGACCAGCCTGGTGCCACTCTCGGACCCCAAGCTGGCC  
GTGCTCATCACCAACTCTAATGTC

>2028

TGCTGGTCCTCACAGGCGTCGGGGCCCCAGGCAGTGAGAAGGCGGCTGCTGACTCCT  
CTTTCCTCCCCAGCTGCCAGGGACCTGGTGAGCAAAGAGGGCTTCCGGCGGGCCCGG  
CACGTGGTGGGGGAGATTTCGGCGCAC

>2029

CCCTCTGGGCGCCCCGCTCCTGCCGGGCACAGGCCGGCCCAGGCCACCCCCTTCAATA  
TCCTCTCTGCAGAGACGACTATGAGGTGAGCTGCCCAGAGCTGGACCAGCTGGTGGA  
GGCTGCGCTTGCTGTGCCTGGGGTT

>2030

CAGGGCCTGGGCGGGCAGGAGCGGCAGCTTCCCGGGGCCCTGCCACTCACCCCCAGC  
CCGCCTCTTACAGGAGCACTACGGCGGGACTGCCACCTTCTACCTCTCTCAAGCAGCC  
GATGGAGCCAAGGTGCTGTGCTTGT

>2031

GGGTGAGACCCAGGAGAGAGGGGAGCTAGAGGGGGGAGCTCTGAGGACTGATCTTGA  
CTGTCTGCCCCAGACCATCAGCATATCCGCTACAACCCGCTGCAGGATGAGTGGGTG  
CTGGTGTGAGCTCACCGCATGAAGCG

>2032

AGTCTTTGAAGCCCACCAGGTAACCTGGTGGTATGGGGCAGTGAGTGCTTCTAGCCTAT  
CCTTGTCGGTAGGTGAATCCCCAGTACGATAGCACCTTCCTGTTTGACAACGACTTCCC  
AGCTCTGCAGCCTGATGCCCCCA

>2033

TGGGGTTTCGCCCTGCCCGTAGCACAGCCAAGCCCTACCTCTCGGTTATCTTTTCTCCCG  
TCACCACCCAGTAAGGTCATGTGCTTCCACCCCTGGTCGGATGTAACGCTGCCACTCAT  
GTCGGTCCCTGAGATCCGGGCT

>2034

ATATGCCAATGATGTGGAGGCTTGGAGGTAAAGGACCTGCCTGTTCTTCTCTGCTTTTG

CCCCTTGACAGGTATGGGCCAGCAGTTTCCTGCCAGATATTGCCCAGCGTGAGGAGCG  
ATCTCAGCAGGCCTATAAGAGTC

>2035

TGCCTATTTGCTGACCACACTCCGGCTCCTATGTCACCTTGATGACTTCCTATCCATTCT  
GTCTTCCTAGGAACGTCTGGTCCTAACCAGTGAGCACTGGTTAGTACTGGTCCCCTTCT  
GGGCAACATGGCCCTACCAGA

>2036

ACTGGATGGAGGTTGCTCCCAGTAGGGTCAGCATCTGGACCCCAGGCTGAGAGTCAG  
GCTCTGATTCCAGATCTAGCCTCCATCATGAAGAAGCTCTTGACCAAGTATGACAACT  
CTTTGAGACGTCCCTTCCCTACTC

>2037

GGGAGTAGGTGCTAACCTGGATAACTGTAAAAGGGCTCTCTCTCCCCACTGTCTCTCT  
CTTTCTGTCAGGGGCTCCACAGGATCAGAGGCTGGGGCCAACTGGAACCATGGCA  
GCTGCACGCTCATTACTACCCTCC

>2038

TGAAGTCCATGCCACCATTCTTGGCAGCCCAGCCCTTATCCTCCTTAATTGCTCCCTGTC  
CCTTTTCCAGGCTGCAGAGAGACTAAGGGCACTTCCTGAGGTTCAATACCACCTGGGG  
CAGAAGGACAGGGAGACAGCAA

>2039

AAAAGTCCAGGTCGCTTCTCAGGATTTGTGGCACCTTCTGACTGTCAAACCTGTTCTTGT  
CAATCTCACAGGCTCCTGGTTGTCTACCCATGGACCCAGAGGTTCTTTGACAGCTTTGG  
CAACCTGTCCTCTGCCTCTGCC

>2040

AAAAGTCCAGGTCGCTTCTCAGGATTTGTGGCACCTTCTGACTGTCAAACCTGTTCTTGT  
CAATCTCACAGGCTCCTGGTTGTCTACCCATGGACCCAGAGGTTCTTTGACAGCTTTGG  
CAACCTGTCCTCTGCCTCTGCC

>2041

ATCTGGAGGCCAGGCTGGAGCTCTCAGCTCACTATGGGTTTCATCTTTATTGTCTCCTTTC  
ATCTCAACAGCTCCTGGGAAATGTGCTGGTGACCGTTTTGGCAATCCATTTCCGGCAA  
GAATTCACCCCTGAGGTGCAGG

>2042

ATCTGGAGGCCAGGCTGGAGCTCTCAGCTCACTATGGGTTTCATCTTTATTGTCTCCTTTC  
ATCTCAACAGCTCCTGGGAAATGTGCTGGTGACCGTTTTGGCAATCCATTTCCGGCAA  
GAATTCACCCCTGAGGTGCAGG

>2043

TGGCCTAGGGCTGCTCACATATTCTGGAGGAGCCTCCCCTCCTCATGCCTTCTTGCCCTC  
TTGTCTCTTAGATTTGGTCGTATTGGGCGCCTGGTCACCAGGGCTGCTTTTAACTCTGGT  
AAAGTGGATATTGTTGCCATC

>2044

CCCAAAGCTGGTGTGGGAGGAGCCACCTGGCTGATGGGCAGCCCCTTCATACCCTCAC  
GTATTCCCCCAGGTTTACATGTTCCAATATGATTCCACCCATGGCAAATCCATGGCACC  
GTCAAGGCTGAGAACGGGAAGC

>2045

TCCCTTGGGTATATGGTAACCTTGTGTCCCTCAATATGGTCCTGTCCCCATCTCCCCCCC

ACCCCGGTAGGCGAGATCCCTCCAAAATCAAGTGGGGCGATGCTGGCGCTGAGTACGT  
CGTGGAGTCCACTGGCGTCTTC

>2046

GGGAGGGGAAGCTGACTCAGCCCTGCAAAGGCAGGACCCGGGTTCATAACTGTCTGC  
TTCTCTGCTGTAGGCTCATTTGCAGGGGGGAGCCAAAAGGGTCATCATCTCTGCCCCCT  
CTGCTGATGCCCCCATGTTTCGTCA

>2047

AGAAGCGGCCAGCCTGGCACCCCTATGGACACGCTCCCCTGACTTGCGCCCCGCTCCCT  
CTTCTTTTGCAGCAATGCCTCCTGCACCACCAACTGCTTAGCACCCCTGGCCAAGGTCA  
TCCATGACAACTTTGGTATCGTG

>2048

CTTTCAAGGTGGGGAGGGAGGTAGAGGGGTGATGTGGGGAGTACGCTGCAGGGCCTC  
ACTCCTTTTGCAGACCACAGTCCATGCCATCACTGCCACCCAGAAGACTGTGGATGGC  
CCCTCCGGGAAACTGTGGCGTGATG

>2049

AGTGCAGGGTCTGGCGCCCTCTGGTGGCTGGCTCAGAAAAAGGGCCCTGACAACTCT  
TTTCATCTTCTAGGTATGACAACGAATTTGGCTACAGCAACAGGGTGGTGGACCTCATG  
GCCACATGGCCTCCAAGGAGTAA

>2050

GACGGAAGGAGGGGGATTTGACTGAATGAAGGCTGACCCCCTACTGCCACCTCTCCCT  
TTTCTTACCCAGAATTGGAGCTGGCCATTAGAATCACTCTTTACGCAGTGATCTTCCTGA  
TGAGCGTTGGAGGAAATATGCT

>2051

AGGAAGTCCCACTGATGCTTGTGTAGTGCAAGTTTCCTAGGTGACTCCTTCCTTCTCTT  
CCCTTGTTTAGGGGTGTCTGTGAGTGTGTCCACGCTAAGCCTCGTGGCCATCGCACTG  
GAGCGGTACAGCGCCATCTGCCG

>2052

CCTTGGCTTTTTTCTCCATCTGTGATTACAGCTGGACAGAAACCCGAGTGATCTGTCTGT  
GTTGCCTTCAGGTCCGTA CTGCTGCTTCTGCTCTTGTTCTTCATCCCGGGTGTGGTTATG  
GCCGTGGCCTACGGGCTTATC

>2053

TCAGGTGGGGACTGGGCTGGAGACTGGGGGGACTCGCCTTTTTTCTCTGACCGCCCACC  
CTTTGTGCTCAGGGGCTGTTACACAGAACGGGCGTTGCCGGCCTGAGACTGGCGCGG  
TTGGCGAAGACAGCGATGGCTGCTA

>2054

GACTGGCTCTGACTTCAGTTCCTAGAAGGTAGGCATCCTTCCCCATTCTCGCCTCTCT  
CCCCTCCTCAGACCCGTCCAAGAAGCAGGGACCATGGCTGGAGGAAGAAGAAGAAG  
CCTATGGATGGATGGACTTCGGCCG

>2055

GATGGGCGGGGCCTGAGGCTGGAGTGAGCGGGGCCCGGATGGGCTCACGGCGGCCGC  
GCCCTCGCCCAGGACGGCTACATTGATTTTCATGGAGTACGTGGCAGGCCTCAGCTTG  
GTCCTCAAGGGGAAGGTGGAACAGA

>2056

GTCCCAATCCTACCCCTGAGATAGGATAAGGATGGGCCCTCTCACTTCTGCCCCCTC

TTCCCTCCCAGGCCATTTCGCGCCATTAACCCCTGCAGCGATAACCACCATGACTGCAGAG  
GAGTTCACCGATACAGTGTCT

>2057

CCCGGTTCTGTGCTCTGGACTGCAGAAATGAACACCCTCCTCCCCCTGATTCCCTTTCT  
CTCTACCCCAGGGGAACTCTCCCTGGAAGAGTTTATAGAGGGCGTCCAGAAGGACCAG  
ATGCTCCTGGACACACTGACACG

>2058

CCCTGCCCAGGAGAGTAGTTGAGGGGTGGAGAGGGGCTTGCTTTTCAGTCATTTCCTCA  
TTCTGTCCTCAGGAATGTCCCAAGCCTTTGAGTAGGGTAAGCATCATGGCTGGCAGCCT  
CACAGGATTGCTTCTACTTCAGG

>2059

CTCCTAGCAGATGTGTCCATTCTCCATGTCTTCATCAGACCTCACTCTGCTTGTACTCCC  
TCCCTCCCAGGTGCCCGCCCCTGCATCCCTAAAAGCTTCGGCTACAGCTCGGTGGTGT  
GTGTCTGCAATGCCACATACTG

>2060

ATGGTGTCAGTGATCACCATGGAGTTTCCCGCTGGGTACTGATACCCTTATTCCTGTG  
GATGTCCTCAGGCCTGCTACTGACCCTGCAGCCAGAACAGAAGTTCCAGAAAGTGAA  
GGGATTTGGAGGGGCCATGACAGA

>2061

AAGTGATAAGCAGAGTCCCATACTCTCCTATTGACTCGGACTACCATATCTTGATCATCC  
TTTTCTGTAGGAATCGGATATAACATCATCCGGGTACCCATGGCCAGCTGTGACTTCTCC  
ATCCGCACCTACACCTATGC

>2062

GTGAGCCACCACACCCAGCTGGTCTGGTCCACTTTCTTGGCCGGATCATTTCATGACCTT  
TCTCTTGCCAGGTTCCCTGGATGCCTATGCTGAGCACAAGTTACAGTTCTGGGCAGTGAC  
AGCTGAAAATGAGCCTTCTGCT

>2063

CCTACAACAGGAACTAGAAGTTCCAGAAGCCTGTGTGCAAGGTCCAGGATCAGTTGCT  
CTTCCTTTGCAGGTACTGACAGACCCAGAAGCAGCTAAATATGTTTCATGGCATTGCTGT  
ACATTGGTACCTGGACTTTCTGG

>2064

ACCCTTACCTACACTCTCTGGGGACCCCCAGTGTTGAGCCTTTGTCTCTTTGCCTTTGT  
CCTTACCCTAGAACCCTCCTGTACCATGTGGTTCGGCTGGACCGACTGGAACCTTGCCCTG  
AACCCCGAAGGAGGACCCAATT

>2065

GGTGACTTCTTAGATGAGGGTTTCATGGGAGGTACCCCGAGGGACTCTGACCATCTGT  
TCCCACATTCAGCAAGTTCATTTCCTGAGGGCTCCCAGAGAGTGGGGCTGGTTGCCAGT  
CAGAAGAACGACCTGGACGCAGTG

>2066

CCCTGCCCCGGGAGAGTAGTTGAGGGGTGGAGAGGGACTTGCTTTTCAGTCATTTCCTCA  
TTCTGTCCTCAGGAATGTCCCAAGCCTTCGGGTAGGGTAAGCATCATGGCTGGCAGCC  
TCACAGGATTGCTTCTACTTCAGG

>2067

TCCAAACAGCTGTGTCCGTTCTCCACATCCTTGTCAGACCTCACCTCTGCTTGTGCTCC

CTCCCTCCCAGGTGGTGCCCTGCATCCCTAAAAGCTTCAGTACAGCTCGGTGGTCTGT  
GTCTGCAATGCCACATACTGTG

>2068

GAGGTAAACGGTGTCAGTGATCACCATGGAGTTTCTCCCTGGGCACTGATAACCCTGT  
GGATGTCCTCAGGCCTGCTACTGATCCTGCAGCCAGAAGTTCAGAAAGTGAAGGGAT  
TTGGAGGGGCCGTGACAGATGCAG

>2069

AAGTGATAAGCAGAGTCCCATACTCTCCTATTGACTCGGACTACCATATCTTGATCATCC  
TTTTCTGTAGGAATCGGATATAACATCATCTGGGTACCCATGGCCAGCTGTGACTTCTCC  
ATCCGCACCTACACCTATGC

>2070

CGGATGCACTGGTTGGGCTAGTATGTGTTCCAACTCTGGGTGCTTCTCTCTTCACTACC  
TTTGTCTCTAGATACCCCTGATTCACCGAGCCCTGCAGTTGGCCCAGCGTCCCGTTTCA  
CTCCTTGCCAGCCCCTGGACAT

>2071

ATCAGGCTTCCTGTTCTCTCGGTCTGGCCCACTTTCTTGGCTGGATCATTATGACCTTT  
CTCTTGCCAGGTTCTTGATGCCTATGCTGAGCACAAAGTTACAGTTCTGGGCAGTGAC  
AGGTGAAAATGAGCCTTCTGCT

>2072

CCTACAAGAGGAACTAGAAGTTCCAGAAGCCTGTGGGCAGGGTCCAGGGTGACTTGT  
TCTTCCTTTGCAGGTACTGACAGACCCAGAAGCAGCTAAGTATGTTTCATGGTATTGCTG  
TACATTGGTACCTGGACTTTCTGG

>2073

ACCCTTACCTACACTCTCTGGGGACCCCCAGTGTTGAGCCTTTGTCTCTTTGCCTTTGT  
CCTTACCCTAGAACCTCCTGTACCATGTGGTCGGCTGGACCGACTGGAACCCATCATTG  
TAGACATCACCAAGCACACGTT

>2074

GGCGACTTCTTAGATGAGGGTTTCATGGGAGGTACCCCGAGGGACTCTGACCATCTGT  
TCCCACATTCAGCAAGTTCATTCTGAGGGCTCCCAGAGAGTGGGGCTGGTTGCCAGT  
CAGAAGAACGACCCGGACGCAGTG

>2075

AAGTGGGCTGAAGACAGCGTTGGGGGCCTTGGCAGGATCACACTCTCAGCTTCTCCTC  
CCTGCTCCCTAGCTCCTCTAAGGATGTGCCTCTTACCATCAAGGATCCTGCTGTGGGCT  
TCCTGGAGACAATCTCACCTGGC

>2076

CTCCTGGAGCAGGGAGAGTGTTGGCCTCTTGCTCTCCGGCTCCCTCTGTTGCCCTCTG  
GTTTCTCCCCAGGCTCCCGGACGTCCCTGCTCCTGGCTTTTGGCCTGCTCTGCCTGCCC  
TGGCTTCAAGAGGGCAGTGCCTT

>2077

GCTAGGTTCCCAGAAAAGTAAAATGGGAGCAGGTCTCAGCTCAGACCTTGGTGGGCG  
GTCCTTCTCCTAGGAAGAAGCCTATATCCCAAAGGAACAGAAGTATTCATTCTGCAGA  
ACCCCCAGACCTCCCTCTGTTTCT

>2078

GCGGGGATGGGGGAGACCTGTAGTCAGAGCCCCCGGGCAGCACAGCCAATGCCCCGTC

CTTGCCCCCTGCAGAACCTAGAGCTGCTCCGCATCTCCCTGCTGCTCATCCAGTCGTGGC  
TGGAGCCCGTGCAGTTCCTCAGGA

>2079

TGAATGAATGAGAAAGGGAGGGGAACAGTACCCAAGCGCTTGGCCTCTCCTTCTCTTCC  
TTCACTTTGCAGAGGCTGGAAGATGGCAGCCCCCGGACTGGGCAGATCTTCAAGCAG  
ACCTACAGCAAGTTCGACACAAACT

>2080

GCTCCTGGAACAGGGAGAGCGCTGGCCTCTTGCTCTCCAGCTCCCTCTGTTGCCTCCG  
GTTTCTCCCCAGGCTCCCGGACGTCCCTGCTCCTGGCTTTTGGCCTGCTCTGCCTGTCC  
TGGCTTCAAGAGGGCAGTGCCTT

>2081

GAGGTTCCCAGAAAAGTAACAATGGGAGCAGGTCTCCAGCATAGACCTTGGTGGGCG  
GTCCTTCTCCTAGGAAGAAGCCTATATCCTGAAGGAGCAGAAGTATTCATTCCTGCAGA  
ACCCCCAGACCTCCCTCTGCTTCT

>2082

AGGTGGGATGGGGTAGACCTGTGGTCAGAGCCCCCGGGCAGCACAGCCACTGCCGGT  
CCTTCCCCTGCAGAACCTAGAGCTGCTCCGCATCTCCCTGCTGCTCATCCAGTCATGGC  
TGGAGCCCGTGCAGCTCCTCAGGA

>2083

TGGATGAATGAGAGAGGGAGGGGAACAGTGCCCAAGCGCTTGGCCTCTCCTTCTCTTCC  
TTCACTTTGCAGAGGCTGGAAGATGGCAGCCCCCGGACTGGGCAGATCTTCAATCAGT  
CCTACAGCAAGTTTGACACAAAAT

>2084

TCCCTTGTTTGGTTAGAACGTTTCTCTCCTCCTCTTGACCCCGGGTTCTAGCTGCCCTTC  
TCTCCTGTAGGAGAACGCCAAGAACGAAGAGATTCTGAATTCCCTCAAGTACGTCCGG  
CCTGGTGGTGGGTTCGAGCCCA

>2085

GGGCCCCCTAGCGGAAGGAAAAAAATCATGGTTCCATGTGACATGCTGTGTCTTTGTGT  
CTGCCTGTTCAAGATGGGGAACCCCTCAGCAGCGAGTGACTGGGACCCTGGTCCTTG  
CTGTGTTCTCTGCGGTGCTTGGCT

>2086

GAGGACAGGTGTCTCGGGGGTGGTGGAAAGGGGACGGTCTGCAGGAAATCTGTCCTC  
TGCTGTCCCCCAGGTGATTGAACAGAGCTACAATGAGACGTGGCTGGGGAGGCAGGG  
GCCTGAGGGACCCAGCTCCATCCCTC

>2087

TGGGGGAAACAGGAAGGGAGCCACTGCTGGGTGCCCTCACCTCACAGCCTCACTCT  
GTCTGCCTGCCAGGAAAAGGGCCATGCTGGTCAACAATGTCCTGGCGGTGCTGGGGG  
GCAGCCTCATGGGCCTGGCCAACGCT

>2088

TGGGCTTTCAGATGGGAATGGACACCTGCCCTCAGCCCTCTCTTCTTCCCTCGCCCAGG  
GCTGACATCAGGGCTGGTGCCCATGTACGTGGGGGAGATTGCTCCCACTCACCTGCGG  
GGCGCCCTGGGGACGCTCAACCA

>2089

ATATGGTGGGCTTCCAAGGTAAGGCAGAAGGGCTGAGTGACCTGCCTTCTTTCCCAAC

CTTCTCCACAGGTGCTGGGCTTGGAGTCCCTCCTGGGCACTGCCAGCCTGTGGCCAC  
TGCTCCTGGGCCTCACAGTGCTAC

>2090

GCCTCCGCCTCATCTTGCTAGCACCTGGCTTCCTCTCAGGTCCCCTCAGGCCTGACCTT  
CCCTTCTCCAGGTCTGAAGCGCCTGACAGGCTGGGCCGATGTTTCTGGAGTGCTGGCT  
GAGCTGAAGGATGAGAAGCGGAA

>2091

CCAGCCTGTTGTGGCTGGAGTAGAGGAAGGGGCATTCCTGCCATCACTTCTTCTTCTCC  
CCCACCTCTAGGTTTTCTATTATTCGACCAGCATCTTCGAGACAGCAGGGGTAGGCCAG  
CCTGCCTATGCCACCATAGGAG

>2092

CCTCACCCACGCGGCCCTCCTACTTCCCGTGCCCCAAAAGGCTGGGGTCAAGCTCCGA  
CTCTCCCCGCAGGTGTTGTTGGTGGAGCGGGCGGGGCGCCGGACGCTCCATCTCCTGG  
GCCTGGCGGGCATGTGTGGCTGTG

>2093

CTGAGTTGAGGGCAAGGGAAGATCAGAAAGGCCTCAACTGGATTCTCCACCCTCCCT  
GTCTGGCCCCTAGGAGCGAGTTCAGCCATGAGCTACGTCTCCATTGTGGCCATCTTTG  
GCTTCGTGGCATTTTTTTGAGATTG

>2094

CTGGTTGCCTGAAACTACCCCTTCCCTCCCCACCTCACTCCGTCAACACCTCTTTCTCC  
ACCTGTCCCAGGAGGCTATGGGGCCCTACGTCTTCCTTCTATTTGCGGTCTCCTGCTG  
GGCTTCTTCATCTTCACCTTCT

>2095

CCGGGTGACATCTGGGAAGGCTGAAAGGAAACAAACCCTTCCTGATGACCCTATCCCT  
GGCTCCCAACAGCCCCCGAGCTCCCCGCTAACCCAGCCCCAGAGGGGCCCAAGTT  
CCCTCGTGTGAAGAACTGGGAGGTG

>2096

TCCCTGCCCCCAACTCCCATCCCACCCCTGCACCCTGGCCTGTCCTGACCTTTGCACTC  
CCTCGACCCAGGATGGGCCCTGCACCCCAAGACGCTGCCTGGGCTCCCTGGTATTTCC  
ACGGAAACTACAGGGCCGGCCCT

>2097

AGCCTGGAGGAGGGCCTCCCTGTCCCACACAACCTTCCTGCTTGTCCCCTTCCCACCCC  
TCTCCTCCCCAGGAGCGGCTCCCAGGCCACGAACAGCGGCTTCAAGAGGTGGAAGC  
CGAGGTGGCAGCCACAGGCACCTAC

>2098

TCTGGAGCTGATACTCAAGACCCCCGTCTCTCTCCTCACCTCCTCTCCCGCTGCCTC  
GGCTGGCTCAGGTGTTGATGCCCGGGACTGCAGGTCTGCACAGGAAATGTTACCTA  
CATCTGCAACCACATCAAGTATG

>2099

CAGGCCCCAGCCTTCTTCCCCAAGGCAGGGAAGGCGGGGCTCTGACCAGCTCTTTCCC  
CATGCGTGCCAGCTCGGCCATCACAGTGTTCCCGCAGCGCTGCCCTGGCCGAGGAGAC  
TTCCGAATCTGGAACAGCCAGCTG

>2100

GTGGATGGAGGGGTCCCTGAGGAGGGCATGAGGCTCAGCCCCAGAACCCCTCTGGC

CCACTCCCCACAGCTCTGCATTACAGCACGGCTGGACCCCAGGAAACGGTCGCTTCGAC  
GTGCTGCCCCTGCTGCTGCAGGCCC

>2101

GGGGGCCATCCCTGAGCCTCTCAAGAAGGGCCTGCAAGGGGGTGCTGATCCCACACC  
CCAACACCCCCAGGCTGGAGTGGTTTGCAGCCCTGGGCCTGCGCTGGTACGCCCTCCC  
GGCAGTGTCCAACATGCTGCTGGAA

>2102

AGATAGTCTCCCCACCCCACCCCCGTGATCACCTCTGTCCCTACCGATGCCACACACCC  
TTCTGCCCCAGGATGTGGCTGTCTGCATGGACCTGGATACCCGGACCACCTCGTCCCTG  
TGGAAGACAAGGCAGCAGTGG

>2103

AGTGGTGGAGGAAGAATGGGCGAGGTCTGTGGGTCTGGTTTGAGCCTCTCCCCCTCTC  
TCTCCCTTCCAGCTAGCCAAAGTCACCATCGTGGACCACCACGCCGCCACGGCCTCTT  
TCATGAAGCACCTGGAGAATGAGC

>2104

AGCAGCCCCTGGGGACCTCTAACCTTTCCCTTTTCTTTACCTCCCCCTCCCAACCCCATCA  
TCTCTCTGCAGCCAGACCCCTGGAAGGGGAGTGCCGCCAAGGGCACCGGCATCACCA  
GGAAGAAGACCTTTAAAGAAGTGG

>2105

GTTGGACCCTTGCCCTGGGGAGGCCCTGCCTCTGTGCACCCGGGACACCCTCACACCTT  
CCTCTCCCGCAGCGCCGTGAAGATCTCCGCCTCGCTCATGGGCACGGTGATGGCGAAG  
CGAGTGAAGGCGACAATCCTGTAT

>2106

GAGGCCAGAGTGAGGAGGGCAGGGCCTCCGGGGGCCACAGCACCCAGGACATCTGT  
CTTCCCACCCACAGGTCCTGTGTATGGATGAGTATGACGTGGTGTCCCTCGAACACGA  
GACGCTGGTGTGCTGGTGGTAACCAGCA

>2107

GGGCTGGGTCTGGGCCTAGCCTGTATCCCCAGGGCCCTGTGACAACCTTGTCTTTGTCC  
TCTCTTGCCAGGAGTTATAAGATCCGCTTCAACAGCATCTCCTGCTCAGACCCACTGGT  
GTCCTCTTGCGCGCGGAAGAGG

>2108

ACGGGTGGGCAAGCTGCCTGGGCAAACGTGGCCTGCAAAGGGAGCTCCACTGACGAC  
CCCTGCACCCCAGGTTCTGTGTGTTGCGGCTCGGCTCCCGGGCATACCCCCACTTCTGC  
GCCTTTGCTCGTGCGGTGGACACA

>2109

CGCCCAGGCGCCTCACTAGGGCGACCCCTGGTGGCGGGAGGTCCTCAGCCCTCACCG  
GCCTGTCCCGCAGGCCGCCTGTGAGACCTTCTGTGTGGGAGAGGATGCCAAGGCCGC  
CGCCCGAGACATCTTCAGCCCCAAAC

>2110

ACTAAAGCACTCTGGGGCCAGGCCCTGCTCCCTAGCTCAGGCTGCCTCATTTGCCCTT  
CCCCGCCCCAGGTTCTGATCCACGTGCACAGGCGGAAGATGTTCCAGGCTACAATCCG  
CTCAGTGGAACCTGCAAAGCAG

>2111

TCCTCCTCCCACATTCTCCCGCCCCCACCCCTCTCTGACTCCCCATAAGTGCCCCTCTCC



CCACCCCCAGGAGGGCCACCATCCTGGTGCGCCTGGACACCGGAGGCCAGGAGGGGC  
TGCAGTACCAGCCGGGGGACCAC

>2112

ACAAACATCAGCCCAGGTACTGCAGTCCTGCTGGGCCCTGTCCTCAGAGCTCCCTGTG  
CACTATCCCCAGGTGGCCCTCCCCCGGCTGGGTGCGGGACCCCCGGCTGCCCCCGTG  
CACGCTGCGCCAGGCTCTCACCTT

>2113

GAGGGGTCAAGAAGGGAGGTTACTAGGAAGGGCTATGGGGCCTCCAACCCACTGCAT  
CCTGCCCCGCCAGGATCCCCGACGCTACGAGGAGTGGAAGTGGTTCCGCTGCCCCACG  
CTGCTGGAGGTGCTGGAGCAGTTCC

>2114

GGCCTGGCCACAGCAGGGTTGGGACCGGCCCTCTCTGGCCCCTCACCGGCCTCTCCT  
TCCCACCCCCAGATGGGCTGGGCCCCCTGCACTATGGAGTCTGCTCCACGTGGCTAAG  
CCAGCTCAAGCCCGGAGACCTGT

>2115

CCACCCTGCATGGTGAGAATGGTGGAGCAGGAAAGGCAAAGGGGACCTGATGGAGTG  
TCTCTCCTGCCAGGGCTCCCTCCTTCCGGCTGCCACCCGATCCCAGCTTGCCCTGCATC  
CTGGTGGGTCCAGGCACTGGCATT

>2116

GGCCTGTGGGGAGGCCCCACTAGCACTGTGCCCCGGAGAAGAGCCTTCCCAAGCGCG  
GGGTTGCTTGCAAGGGCTGCAGCCCACTCCCATGACTTTGGTGTTTCGGCTGCCGATGCT  
CCCAACTTGACCATCTCTACCGCGA

>2117

CAGCCAGCAGCCCCGGGCTGCCCCGCGCCCACCCCACCAGGGCCCCGCCCTAACCC  
CGCCGCCCCGCAGACCTACGTGCAGGACATCCTGAGGACGGAGCTGGCTGCGGAGGT  
GCACCGCGTGCTGTGCCTCGAGCGGG

>2118

GGGGGCTGGGGCCTGGGGGGATGCTTCCAGGGGATGCAGGGGGATCCACTCAAGGCT  
CCCTTGCCACAGGTCCTCATGCCTCTCCTCCTTGTGCTCCTGCTGCCAAGCCCCT  
TACACCCCCACCCCATCTGTGAGG

>2119

GGGATGGGGTCTCTGCTAAGGGCCAGGAAGTCCCTTCCCCTTCCCAAAAACAACTTA  
CCCAATCCACAGCCGCCCTCACCGCCCGGCCTTCTACGGTGTCCAGAGACAGTTAGCC  
AGGCCTGGGCTGGGCACACTCCAC

>2120

CCCAGTGCTTGCCGTCCCTGAGGATCGGTCCAGGCTGCCAGGCCCTCCCTCACAGCCC  
CTCTCTCTGCAGCCAGCCTGTCCCATGCCTGCCTGGGGAGCCCTGTTCCCTGCTCTGGGC  
CACAGCAGAGGCCACCAAGGACT

>2121

GGGGGACGGGGCGTGGCGCTGGCTGGCGTGAGAAGTGCGGTGCTGATGTCCCTCTGT  
CGGGTTTTTGACGCTCGGCGTGTTCAAGAACGGCCGCGTGGAGATCATGCCAACGA  
TCAGGGCAACCGCATCACGCCGTCC

>2122

TGGTAGTGGGTCTTTTAACTTTGAGATGTCATTGTATCTGTGTCTGAAAACAATAATTC

TTTAAAATAGGTGGTTGAAAAGAAAACATAACCATACATTCAAGTTGATATTGGAGGTG  
GGCAAACAAAGACATTTGCTC

>2123

CTGGCCAGACTGTAATTTAAATAAGGGTTAAACTATGTGACAATACACTTAATTATCTTT  
ATCCTTTTAGGTTACCCATGCAGTTGTTACTGTACCAGCCTATTTTAATGATGCCCAACG  
CCAAGCAACCAAAGACGCTG

>2124

ATACGGCATATTTGCCAAATAGTGGAATGTGAAGTACTGACAAAACCTTTTCCCTTTTT  
CAATCTAATAGTACGGCAGCTGCTATTGCTTATGGCCTGGATAAGAGGGAGGGGGAGA  
AGAACATCCTGGTGTTTGACCTG

>2125

CTCTGAATTCAGGACATTGCATCTAGATACTTAGATAACAGACATCACAGTAACCATGT  
CTTTTTTCTAGGATCTGTTCCGGTCTACTATGAAGCCCGTCCAGAAAGTGTTGGAAGAT  
TCTGATTTGAAGAAGTCTGATA

>2126

TTAGAGAGATAAACTTTACATAGCTCATAGGGAGAACTTGAATTAAAAGTTAAATAACT  
TATCCTTACAGGTGACCTGGTACTGCTTCATGTATGTCCCCTTACACTTGGTATTGAAAC  
TGTAGGAGGTGTCATGACCAA

>2127

AATGCGGGGATCTAGATGTGCTAATGCTTGTCAGTAACAACATAACAAGTTTTTCTGTAT  
GTAACCTTCTAGGTGAAAGACCCCTGACAAAAGACAATCATCTTCTGGGTACATTTGATC  
TGAATGGAATTCCTCCTGCTCC

>2128

CTGGTGCAGAGAAAGTCACCAAGTCAGGGACCCTCCATCTCTGACACGACCTGCGGG  
CCATCTCTTCCAGCTGGCCCACGCCATGCGCCTGCTCCTGGAATACACAGACTCAAGCT  
ACGAGGAAAAGAAGTATACGATGG

>2129

GCATATGGGAAGGGGATGCTGGGGAGCCTGCTGGCCCCAACTGAGCTTCCCCGGTTTC  
CCATCTATCCAGCTGCCCTACTTGATTGATGGGGCTCACAAGATCACCCAGAGCAACGC  
CATCCTGTGCTACATTGCCCGCA

>2130

GAAGGTGGCATCCTCCTTGGCTGGATTGGGGTGCTATGCTCAGAGTGAGTCTGTGTTTT  
GTGGGTGGCAGGTGGGGAGACAGAAGAGGAGAAGATTTCGTGTGGACATTTTGAGAA  
CCAGGCTATGGACGTCTCCAATCA

>2131

AGCCCTGGGGAGGCCACATCTGTGCAGGGAGCTTGTGTCTGAGGGTGGTGACAGCTG  
TTTTCTGCCTCAGGAGAACTGAAGCCAGAATACTTGGAGGAACTTCCTACAATGATG  
CAGCACTTCTCACAGTTCCTGGGGA

>2132

GGACACTAGAGATTTGCCATACATCCTATGTTACAGAGATTCCAGCCCACACATTCTTG  
GCCTTCTGCAGATCACCTTTGTAGATTTCTCGCCTATGATGTCCTTGACCTCCACCGTA  
TATTTGAGCCCAACTGCTTGG

>2133

TGCAGTGGGGTTGTCCCAGCCCTCATGGGCAGCTGACCTTGAGTTCTGGCCTTATTTTC

CCCCCTCTCAGGGCTTGGAGAAGATCTCTGCCTACATGAAGTCCAGCCGCTTCCTCCC  
AAAACCTCTGTACACAAGGGTGG

>2134

ACCCCTCCCCGGGTTGCTGCGAGGCGGAGTCGGCCCGGTCCCCACATCTCGTACTTCT  
CCCTCCCCGCAGGCCGCTGCGCGGCCCTGCGCATGCTGCTGGCAGATCAGGGCCAGA  
GCTGGAAGGAGGAGGTGGTGACCGT

>2135

GGGGGCTGTGACTAGGATCGGGGGACGCCAAGCTCAGTGCCCCCTCCCTGAGCCATGC  
CTCCCCAACAGCTATACGGGCAGCTCCCCAAGTTCCAGGACGGAGACCTCACCTGT  
ACCAGTCCAATACCATCCTGCGTC

>2136

CCCATCCCCAGTGACTGTGTGTTGATCAGGCGCCCAGTCACGCGGCCTGCTCCCCCTCC  
ACCCAACCCAGGGCTCTATGGGAAGGACCAGCAGGAGGCAGCCCTGGTGGACATGG  
TGAATGACGGCGTGGAGGACCTCCG

>2137

TGGGGCAGACGGGGGTGTCTCAGGGGCTGGGAGGGATGAGAGTAGGATGATACATGG  
TGGTGTCTGGCAGGAGGCGGGCAAGGATGACTATGTGAAGGCACTGCCCGGGCAACT  
GAAGCCTTTTGAGACCCTGCTGTCCC

>2138

TTAGGCCCTCTGCCCCCAATTCCTCCAGCCTGCTCCCGCTGGCTGAGTCCCTAGCCCCC  
CTGCCCTGCAGATCTCCTTCGCTGACTACAACCTGCTGGACTTGCTGCTGATCCATGAG  
GTCCTAGCCCCTGGCTGCCTGG

>2139

ATGGGCGCGCCGCCTTGGTAATTCTATATTCTCCGTTCCCTCCGCTCGCGGGCGTGTG  
CGCGCCGCAGGCTGGCGGTAAGGCTGGAAAGGACTCCGGAAAGGCCAAGACAAAGG  
CGGTTTCCCGCTCGCAGAGAGCCG

>2140

GCGCATATAATTTCCCATCTCTAGTTCTCATTTTTGTGCATTTATGTTTGTGTATGCTTAA  
AATTTAAGTTCCCAGTGGGCCGTATTCATCGACACCTAAAATCTAGGACGACCAGTCAT  
GGACGTGTGGGCGCGACTG

>2141

GGTTTTATTCTGTTCTCTGAATCTTGGCCAAAGGAAAGTTGGAAGGCAACTGACAGAT  
TCTGCCTTTTAGGTACTTGAAC TGGCAGGAAATGCATCAAAGACTTAAAGGTAAAGC  
GTATTACCCCTCGTCACTTGCAAC

>2142

CTTCTTGGTTTCAAATACTGTGATTTTTTAAAAAATCTTAAGTAGAATTAATTCCTGTC  
ACTCTCCTAGGTGTCATTCCACACATCCACAAATCTCTGATTGGGAAGAAAGGACAAC  
AGAAGACTGTCTAAAGGATGCC

>2143

TGCGGGGACGCTCTTGGGAGGAGTCTTCTCCCCAGCCTTAGCTGGTTTCATGATTTCTT  
TGCGTCTGTAGGCAACGCGGTAAAAATATTGCTTCGGTGGGTGACGCGGTACAGCTGC  
CCAAGGGCGTTCGTAAACGGGAAT

>2144

TCTATAGTTAACGCCGGATCGCAGTTGGAAACCACCAGCTTTTTGTTCAGTATATATTACT

CATTTTATAGAGCCAGAGGCCAAGAAGAGTAAGACGGCCGCAAAGAAAAATGACAAA  
GAGGCAGCAGGAGAGGGCCCAGC

>2145

GCATATAGATTATTCAATAAATGTTCTGCTGAATTGATAATACGTTTTCCACCTTTCTTTT  
CACTTACAGTGGGTAAAGGAAGAAGCCCCAGATATACTGTGCCTTCAAGAGACCAAAT  
G TTCAGAGAACA AACTACCAG

>2146

TCTGCCCCACCTCTTGATTGCTTTCCCTTTTCTTATAGTTTTTTATGCTAATTCTGTTTCAT  
TTCTATAGGCGATGAGGAGCATGATCAGGAAGGCCGGGTGATTGTGGCTGAATTTGAC  
TCGTTTGTGCTGGTAACAGC

>2147

CCCACAGGCCACCCTCAACCGTCCTGGCCCCGGACCCAAACCCACCCCTCACTCTGC  
TTCTCCCCGCAGGATGTTCTGTCTTCCCCACCACCAAGACCTACTTCCCGCACTTCG  
ACCTGAGCCACGGCTCTGCCCAG

>2148

CCCACAGGCCACCCTCAACCGTCCTGGCCCCGGACCCAAACCCACCCCTCACTCTGC  
TTCTCCCCGCAGGATGTTCTGTCTTCCCCACCACCAAGACCTACTTCCCGCACTTCG  
ACCTGAGCCACGGCTCTGCCCAG

>2149

CAGAGAAGACTCTTGGGTTTCTGATAGGCACTGACTCTCTCTGCCTATTGGTCTATTTTC  
CCACCCTTAGGCTGCTGGTGGTCTACCCTTGGACCCAGAGGTTCTTTGAGTCCTTTGGG  
GATCTGTCCACTCCTGATGCT

>2150

CTGGATTATTCTGAGTCCAAGCTAGGCCCTTTTGCTAATCATGTTCATACTCTTATCTTC  
CTCCACAGCTCCTGGGCAACGTGCTGGTCTGTGTGCTGGCCCATCACTTTGGCAAAG  
AATTCACCCCAACAGTGCAGC

>2151

AAAAGTCCAGGTTGCTTCTCAGGATTTGTGGCACCTTCTGACTGTCAAACGTCTTGT  
CAATCTCACAGGCTCCTGGTTGTCTACCCATGGACCCAGAGGTTCTTTGACAGCTTTGG  
CAACCTGTCCTCTGCCTCTGCC

>2152

GCGCCCCCGCCCCAGGGGCCCTCCCTCCCCAAGCCCCCGGACGCGCCTCACCCAC  
GTTCTCTCGCAGGACCTTCCTGGCTTTCCCCGCCACGAAGACCTACTTCTCCACCTG  
GACCTGAGCCCCGGCTCCTCACA

>2153

CCCCGGCGGGGTGGGTGCGGGGGGCGTGCGGGGCGGGTGCAGGCGAGTGAGCCTTG  
AGCGCTCGCCGAGCTCCTGGGCCACTGCCTGCTGGTAACCCTCGCCCGGCACTACCC  
CGGAGACTTCAGCCCCGCGCTGCAGG

>2154

TGATGTCACATGGCTGGATCCAGCTAAAATTCTAAGGCTCTAACTTTTCACATTTGTTCC  
ATGTTACCAGTCATCAGGTGGAAAAGCGGAAATGCAACACTGCCACATGTGCAACGCA  
GCGCCTGGCAAATTTTTTAGTT

>2155

TTTTTGAGAAACACTTG TACTGTCA TTCTCTATTCTCTGCAATTGCTCTCTCCTTTTGT

GTGTATGCAGGAAAAGCATCATTACATCGAGAATTTCCATTTTATGGGGACTATGGATC  
AAATTATCTATATGACAATT

>2156

TTTGTGAAGCATTTTACTGTCAATTGCCTCTATTCTCTGCAATTTGCTCTCTCCTTTTGTG  
TGTATGCAGGAAAAGCATCATTACATCGAGGCTATAGATCAAATTATCTGTATGACAAT  
TGATATCTTCAGTAATCAC

>2157

CGGGGTGCAGTGGGGACAGGGGTTGCAGTGGAATCTGAGTTCTCCCTCCCTCCATCCT  
GTCCATTCCCAGGAGAACTATGAGCTCTACTCGGTGGAGCTGGGTCCTGGCCCTGGCG  
GGGACATGGCTGCCAAGATGAGCA

>2158

GGGGCTTTCCACGGGGTGTGCATGTGGAGGAAAGCCCCCAGGACCGCCTCGCCCTGC  
CCCTCTGTCCCAGGGCCTCTCTGCGAGCCTGGCTGCTGAGCTGCTGCTGCGGGATGGG  
CCCAACGCACTGCGGCCACCACGGG

>2159

AGCAGGTCGGTGGCCTCAGGCAGGCAGCTTCCGGCCCCCTCTGAATAACCCACCCCTT  
CCCTGTCCCCAGCTGTACCTGGCAATCGCTCTCATTGCTGTGGTTGTCTGTCACCGGCTG  
CTTTGGCTACTACCAGGAATTCA

>2160

TACCTCCCCACATGCAGCAGCTCCCACCCCCACCCCCGTCCACCTCAACTTTGGTGCCC  
CTGCCCCGCAGCAAGCCACTGTCATCCGCGATGGAGACAAATTCCAGATCAACGCTGA  
CCAACCTGGTGGTGGGCGACCTGG

>2161

TCAGCTCACACGGCAGTGCACACCCCCTGCGGCCCCCTATCCCTGAGTCGCGCCTTG  
GCCCCCTGCAGGCACCGCGCAGGGCCTGGTGGTGAACACGGGCGACCGCACCATCA  
TTGGGCGCATCGCATCGCTGGCGTC

>2162

TCTTTGACGCGGGGAAGAGGACTGGAAGCCAGGGTGGGTCCCCAGCCTGCGGTGCTC  
ACCCCTTCCCCAGGTCTGCCTGTCCCTGACAGCCAAGCGCCTGGCCAGTAAGAACTGC  
GTGGTCAAGAACCTGGAGGCGGTGG

>2163

GGAGGAGGGGGCTCGGTTCTGGTCCGGGAGAGCCGCGGTGCGGGACCCAGCCTGGAC  
GCCTGGTCTGCAGGGCAGACGTTTGACCAGTCCTCGGAGACGTGGCGGGCGCTGTGC  
CGGGTGCTCACCTGTGCAACCGCGC

>2164

GGGGGCCTCCAGGGAATCCCGGGAGGCTGGTGTAGCCGGCTTCGCCCCTGACACCGG  
TCCCCGCTCCCAGCGCATCGTGATTGGAGACGCATCGGAGACGGCGCTGCTCAAGTTC  
TCGGAGCTGACGCTGGGCAACGCCA

>2165

CCCCGTTCCCTCGTCCACAGCCCCGCCCGTTCCCCCGTCCACAGCCTCGCCTCTCCCC  
CCCGCCACAGCTGTCCATCCATACGCTGGAGGACCCGCGGGACCCGCGACACTTGCT  
GGTGATGAAGGGCGCCCCCGAGC

>2166

ACCATTTCTTGGCCCTGCTAAGAAAGGGTGTGCCAGGGCTCTTCCCTGACTTCCCC

GTTTCCGGTCAGGCTTCTGCCAGCTCTACCTGAATGAGAAGGACTACCCGCCTGGCTAT  
GCCTTCGACGTAGAGGCCATGAA

>2167

TGTCTCCCAGGGAGGACAGGGAGATTGGGCTGATCTGAAGGGGTCAGTGATCCACTG  
GTTCCCCCTACAGGTGATCATGGTAACGGGTGACCACCCCATCACCGCCAAGGCCATT  
GCAGCCAGTGTGGGCATCATCTCGG

>2168

CCTCCCCGGGGTTCTCCCCACATCTGGCACAGACCGAGGTCCCAGCGAGGTCCCTCCCA  
TCTCCTCCCCAGGGATGCCCCGTGCCTGTGTGATCAATGGCATGCAGCTGAAGGACATG  
GACCCATCGGAAC TGGTCGAGGCC

>2169

ACAGGCGGGGCTGGTCTTGGACCGGCCTCTCACTGACCACCCACCCACCACCTGCAC  
CCACTGCCTGCAGGGTGC GATTGTGGCCGTCACGGGGGATGGTGTGAATGACTCCCCA  
GCTCTGAAGAAGGCAGACATCGGAG

>2170

GAGGGCAGGCAGTGTGGGCACAGGAGGGAGAGGGCTGTGAGGAGGCTGAGGTGCCC  
ACCCTACCCACAGGTGCACTGATCTTCGACAACCTGAAGAAGTCTATTGCCTACACAT  
TGACCAAGAACATCCCAGAGCTGAC

>2171

GGGGACCCGAAGTGGAGGGGACAAGGGCCCAGCCAAACCCTCAGTCCCAGTTCCTTC  
CACTCCTGGCCAGTTCCCATCTGTGTCCCTGGCATATGAAAAGGCCGAGAGTGACATCA  
TGCACCTGCGTCCACGCAACCCAA

>2172

GTCCCTCTCTTCCTGTGTCCCTGTCTCTGTGTCCATCTCTGTCTCCCTGTGTGGGGTTGT  
CTCTCTCCAGGTGCCATTCAGTCCTTTGCTGGCTTCACTGACTACTTCACGGCAATGGC  
CCAGGAGGGCTGGTTCCCACT

>2173

TGGGCTGCAGAGGCTCTCCGCCGGGACTCAGGCTGGACTCAGGCTGTTTCCGTTTGCC  
CCTGGCCTGCAGACATTCGGGCAGCGCCTGTACCAGCAGTACACCTGCTACACCGTGT  
TCTTCATCAGCATTGAGGTGTGCC

>2174

GACCCACAGTATCCTGATTTCCATCACGTCCCCAATTCTTAATGGCCTGTCCCATTCTGC  
CCACCCCCAGGAATAAGATCCTGGTGATCGCCATCGTGTTCAGGTCTGCATCGGCTGC  
TTCCTGTGCTACTGCCCCGGC

>2175

GGGGCAAGGACAGGGAGGGGGCTGTAGGGCACAGGCCTGGGATGGCCTTCACCTTGC  
CATGTGCCTTCAGGTTCCAGTGGTGGCTGGTCCCCCTGCCCTACGGCATCCTCATCTTC  
GTCTATGATGAGATCCGGAAGCTT

>2176

ACCTCTGAGCCCCTGCCCTGCCTAAGTGGCACCCCCAGCACTGAGTCTCCTTTCTCCCT  
CTCTCTCCAGGCTGGTGGGACCAGGAAC TACTATTAGAGGGACGACTGCCTTCAA  
GCATCCCTGCAACTGCCACAGCA

>2177

CCACCCCCGGACACTTCGAGCAGTGGAGGCCTTGTCTCTAACC GGCTGGGCGGGG

CTTGTCTGTGCAGGGTCTGGTCGCCAGCAACCTGAATCTCAAACCTGGAGAGTGCCTT  
CGAGTGCGAGGCGAGGTGGCTCCTG

>2178

GTGACAGATTAGTCGGTCAGTGGGGCTGGAGCTGGCCGAGGTGGCCTCATGCCCCACCC  
GTTACCCCCCAGCTTCGTGCTGAACCTGGGCAAAGACAGCAACAACCTGTGCCTGCAC  
TTCAACCCTCGCTTCAACGCCAC

>2179

CACATGAGGAACGGGTTCTGGAAGGGCCCATGGCATGTGGGGCCCGGCTCACTGCTCTC  
CTCTACCCCCAGGTGTGCATCACCTTCGACCAGGCCAACCTGACCGTCAAGCTGCCAG  
ATGGATACGAATTCAAGTTCCCA

>2180

GGAAAAAGTAAAACAAAATGTAAATAAGGAGTAAAGCATGTACTTAAAATATATTCTTA  
TTCTATCATAGGATAAATCTTCAGACAAAAAAGTGCAAACAAAAGGGAAAAGGGGAG  
CAAAGGGAAAACAGGCCGAAGTGG

>2181

GCGCCCGCCCTGGCAGCTGCGGCGTCCGCGCCGACCTCCGGCTTCCCCTCTCCCCCT  
CGGCCCCGTGAGGTGGACGCGGATCTGTCAACATGGGTAAAGGAGACCCAACAAGC  
CGCGGGGCAAATGTCCTCGTACGC

>2182

ATCTTGTGCTCTTTGGATGTTTATAGGTAACAATTTTGCTGTATTTTGGCTCTTATTTTAT  
GTCCACAGACCATGTCTGCAAAGGAGAAGTCGAAGTTTGAAGATATGGCAAAAAGTG  
ACAAAGCTCGCTATGACAGGG

>2183

AGTTTAAAATAACCCAAATTGCTCCTTGGATTTTTCCTTCAGTTTATTAAACTCTGTTGC  
TTCCTTTCAGATCTGCCTTCTTCCTGTTTTGCTCTGAACATCGCCCAAAGATCAAAAGT  
GAACACCCTGGCCTATCCATT

>2184

TTTACAATAAGTGGTTTTTTCACAGTTGAGTAATGATACCGGATGCTTTATTTTTTTGAC  
AATATTTTCAGGATATTGCTGCATATCGTGCCAAGGGCAAAGTGAAGCAGGAAAGAAG  
GGCCCTGGCAGGCCAACAGGCT

>2185

CTAAAGAGTCAGGGTCAATTTCTTTCAGACATTCTTGCCACAACAGCATTTTTTTTCC  
CTCACAATTAGGAACCAACCGGTGAGCCCTCTCCTAAGAGACCCAGGGGAAGACCCA  
AAGGCAGCAAAAACAAGAGTCCCT

>2186

CCTGCGGGGGGCGGGGACCCGGGAAAGGCGCGCGGTGGGGGAGGGGGCGCGCAGCT  
GCGGCGAGCGCGAGTTGTGCACCCGGCGGAGCCCGGAGGAGCCCGGCGCACCTCGC  
GCGGCGGCCGCTCCCGCTGGAGCCGGAG

>2187

CAAAAATGTTTTTTTCCTCTCATTGGGGTAAAAACTCTTTTCTTCTTTTTTTTTTTCTT  
TTAAATTAGACATGGGAGTCCCACCGTATTGTCCAGGCTGGTCTCGAACTCCTGACCTC  
AAGCAGTCCTCCTGCTTTGG

>2188

TGTGGGTGATGAGGGGGTAGAAAGTGGCTGAAGCGAGATGTTTGTCTAAAAGCACTTT

TCTGTCTCCCAGCATCCCAGCCATCACTCTTCCACCTGCTCCTTAGAGAAGGGAAGATG  
AGTGAGTCGAGCTCGAAGTCCAG

>2189

GAGGGCTGTGTCTTCTGAGGGGGTGGAAACAGGTGATGACTGTCCCTGACTACCCCCCT  
CTGTCTTTACAGAAGGAGCCCAGCGAAGTGCCAACACCTAAGAGACCTCGGGGCCGA  
CCAAAGGGAAGCAAAAACAAGGGTG

>2190

GGCCAGCCTCTGGGGGTGGAAGAGGGGGGCCACCGGGCCAGAGCTCACACCAACAAC  
TGCCACCTCACAGGAGAAGGAGGAAGAGGGGCATCTCGCAGGAGTCCTCGGAG  
GAGGAGCAGTGACCCATGCGTGCCGCCT

>2191

CAAGCTTGTCCCCCTGGCGGACTTTGGAAGACAGGAGTTGGTGGCTAAACCGCTGACT  
TTTCTATTGCAGACAACATAGGCGGCCCGGAAGGCAAAAGGGCCCGGACGGCCTACA  
CGCGCTACCAGACCCTGGAGCTGGA

>2192

CACCCCTCTCCAGTCCTGAGGGTCCCCACCCAACTCACTCAGCGCCCTCCCTCTCTCC  
CTCCCTGCCCAGGAGAGAGCTGCGAGGACAAGAGCCCGCCAGGCCACGATCCAAGC  
GGGTACGCACGGCATAACGAGCGC

>2193

TTCTCAGGCCCCCTGCTCTGTTTCTCTAGCTCCTCAACTTTTCTCTTTCCCCACTCCCAC  
TCCTCCCAAGGAAACACGCCCTAACTGCCACCGAATGAAGCCTGCTCTCTTTAGCGT  
CCTGTGTGAAATCAAGGAGAAA

>2194

AAGCACCAGGAGGACTGAGCACTGGGTATTGGGGTCTCTGGGTCCCTAAGTCCACTCG  
CCTGCATGCTAGGCCTCAGCATTCGGAGCTCCCAGGAGGAGGAGCCGGTGGACCCAC  
AGCTGATGCGCTTGGACAACATGCT

>2195

GAAGGGCTCTTGCAAGGGAATCCCATGGTCAAAGGGCTCCTCCTCACCAGCCCACTGG  
CCCCACTACAGGCATGTAATGAGTTCACGACCCATGTCATGAACCTGCTGAGGGAGC  
AGAGCCGCACCAGGCCCGTG GCCC

>2196

GGGTCATGCCATGTGACAGCCCTGCCAGGACATCAACATCCTCCTCACCGCTCTTCTCC  
CTCCTCTGTAGACGAAAGCGCCGTAACCTCAGCAAACAGGCCACTGAGGTCCTAAATG  
AGTATTTCTACTCCCACCTGAGT

>2197

ACTCACATCTTATTCAGTGAAGGACTTCAGAGGCAAATGTTTCTACCTGACCCTCCTTT  
CTGCCCCACAGGTCTCCAACCTGGTTTGGCAACAAGAGGATTCGCTATAAGAAAAACAT  
CGGAAAGTTCCAAGAGGAGGCAA

>2198

AGTTGAGAGTTGTGGTTCATCCTCTACCATCACGGGCTCTATTACACTCTTCCCTCTCTG  
CCCCACAAGGCTCTGGCGGCTCTTTCAATCTCTCAGGATCTGGAGACATGTTTCTGGG  
GATGCCTGGGCTCAACGGAGA

>2199

ACTTTAGGATACAAGACCTCTTTCCTCTGAGGCTTCTCTTCACTGTCATACCTTCCTCTG



CTGCCTGCAGGTGGAATCACTCCGACACTCGATGGGGCCAGGGGGCTATGGGGATAAC  
CTCGGGGGAGGCCAGATGTACA

>2200

CTAGTAATGTTGTGCCACACAGGGTTCCCAGGGCTTTCTCTGTTTTCTGTACTCTGTCT  
CTCCTTTCAGGCAAATGGCAGCTGGCAAGAGGCTGTGACCCCCTCTTCAGTGACATCC  
CCAACGGAGGGACCAGGGAGTG

>2201

CACCCACCCTGTCCAAATTTTGTTAGCCCTCATTCCCTTCCCTACCCCTCTACCATGGTGC  
TATCTCCCAGGGGCAGTAGTAGGTGCTCAAAACATCACAGCCCGGATTGGCGAGCCAC  
TGGTGCTGAAGTGTAAGGGGGC

>2202

CCCGTCACTCTGCCTCACAGTCCTTTCCCAAAGGCCTTGCACTGTTTAGGCCCTGCTTC  
TCAGCTTCTAGAACACAGGCCGGACAGAAGCTTGGAAGGTCCTGTCTCCCCAGGGAG  
GAGGCCCTGGGACAGTGTGGCTC

>2203

GTGTGTGTGGGTGTGGGTGTGTGGCATCTCTCATTTTCAAAGGATTCTGAGGTCACCAC  
TCTTTCCCCAGGTGGGGACATGTGTGTGTCAGAGGGAAGCTACCCTGCAGGGACTCTTAG  
CTGGCACTTGGATGGGAAGCCCC

>2204

CAAGCTGCCTTCTCCCTGATCTCACTCCCACACCCACCCTGGGATAATTTGTCTTATCCT  
CCCATCATAGGAGTATCTGTGAAGGAACAGACCAGGAGACACCCTGAGACAGGGCTC  
TTCACACTGCAGTCGGAGCTAAT

>2205

AGTCAAGCCCATGGCCACTGGGATCACTCACAAGTGTAACCTCTCCACCTCAAAACCCT  
TCCAACCTCCCAGAGCCTGTGCCTCTGGAGGAGGTCCAATTGGTGGTGGAGCCAGAAG  
GTGGAGCAGTAGCTCCTGGTGGAAC

>2206

GGGTATCTGAAGATATGGAGACAAAAAGACAAGGGTTTTTGAAATAGTCTCCTCTCCCC  
TTCCCCCACCAGGGTGTGCCCTTGCCCTTCCCCCAGCCCTGTGCTGATCCTCCCTGA  
GATAGGGCCTCAGGACCAGGGAA

>2207

GGGATGGTCAACAAGAAAGGAATGGTGAGTGGTGGTGGCTGTGCTCTCAATTTTCCCT  
GTCTCCGTACAGGCTCTGTGGGAGGATCAGGGCTGGGAACCTCTAGCCCTGGCCCTGGG  
GATCCTGGGAGGCCTGGGGACAGC

>2208

GGCAGCAAGCGAAGAGGGGTGCGGGGGGTGGAACGACAACGTGCCGCATTCCCCCAA  
TCTTTCTCCTCAGGAAGGCCCCAGAAAACCAGGAGGAAGAGGAGGAGCGTGCAGAA  
CTGAATCAGTCGGAGGAACCTGAGGCA

>2209

GTGTGGATGCATGCATGTGCTGTGAAGCAGGGAGACTAGCTTTCCACTCCTCCTTGTCT  
TCTCTCTGCAGTGCCCTGGGAGCTGTCAATTGCCCTCCTGCTCTGGGGACAGCTTTTTGC  
AGTGGACTCAGGCAATGATGTC

>2210

ATCTGACTTTTCACGGTTCCTGTTGGAACAATTTCCAAATAGCAAACCTCTCTGGCTTCTC

TCTCTTTGCAGATGACGGCTGCCCCGAAGCCCCCGAGATTGCACATGGCTATGTGGAG  
CACTCGGTTCGCTACCAGTGTA

>2211

ATGCCTTCTCACTCTGCTCTGGGTGCAGACTTGACTTTTCCTTTGGCTCATTTCTTGCT  
TTTGTTCAGGAGTATACACCTTAAATGATAAGAAGCAGTGGATAAATAAGGCTGTTGG  
AGATAAACTTCCTGAATGTGA

>2212

ATCTGACTTTTTCACGGTTCCTGTTGGAACAATTTCCAAATAGCAAACCTCTCTGGCTTCTC  
TCTCTTTGCAGATGACGGCTGCCCCGAAGCCCCCGAGATTGCACATGGCTATGTGGAG  
CACTCGGTTCGCTACCAGTGTA

>2213

ATGCCTTCTCACTCTGCACGGGGTCTAGACTTGACTTCTCCTTTGGCTCACTTCTTGCC  
TTTTGTTTCAGGAGTGTACACCTTAAACAATGAGAAGCAGTGGATAAATAAGGCTGTT  
GGAGATAAACTTCCTGAATGTGA

>2214

TTTCACCCCTTTCTCAGATGGAAAGGCTCTTGACATTTCCACTCACGAGTGTCTTGCT  
CTCCTTGACAGTATGTGGGAAGCCCAAGAATCCGGCAAACCCAGTGCAGCGGATCCTG  
GGTGGACACCTGGATGCCAAAGG

>2215

AACATCTTAATCCAATCAAATGTTTGTATCCTGTAATGCTCTCATTGAAACAGCTATATTT  
CTTTTTTCAGATTAGTGATGATGAACCAGGTTATGACCTTGATTTATTTTGCATACCTAATC  
ATTATGCTGAGGATTTGG

>2216

ACTAAGAGGTGTTTGTATATAAAGTTAATGTATGAACTTTCTATTAAATTCCTGATTTTA  
TTTCTGTAGGACTGAACGTCTTGCTCGAGATGTGATGAAGGAGATGGGAGGCCATCAC  
ATTGTAGCCCTCTGTGTGCTC

>2217

ACATGGGGGTTTTGGTACTTTATATTGTGACTCTGAATTTAAAGCTATGCAATGTCTTCT  
TTTTTGAAAGGATATAATTGACACTGGCAAAACAATGCAGACTTTGCTTTCCTTGGTCA  
GGCAGTATAATCCAAAGATGG

>2218

CACATTTGCCAGTATTAGATTTAAAAGTGATGTTTCTTTATCTAAATGATGAATTATGAT  
TCTTTTTAGTTGTTGGATTTGAAATTCAGACAAGTTTGTGTTAGGATATGCCCTTGACT  
ATAATGAATACTTCAGGGA

>2219

TTGTAAAAAATGGGGTGGAGGAAAATAAGGCATCTGCTGAGTGTATAACCATTTTACCT  
CTTGTTTTTAGCCCTCTTCTGGGTACGCTAGAATCAGATCTGCTCTCCAGCATCTTCTG  
TTTCCTGGCAAGTGTTTCCTG

>2220

TCGCCTTTATCAGAAAACCTCCCAGCCAGATCCAGAAATCTTTCCAATGACCTGACCTG  
TGTTACACAGAGCTCCAGAACAGGACCAAGCTGACTGTACTTGAAGGAGACATTCT  
GGATGAGCCATTCTGAAAAGAGC

>2221

GGATCTGTGCATGTGGTTGCAGCTCCTTTGGGATATTTCTGACACTGTCATCATGCTCT

TCGTGGGCAGGTACCCAGCTACTGTTGGAGGCCTGTGTCCAAGCCAGTGTGCCAGTCT  
TCATCTACACCAGTAGCATAGA

>2222

TGCACTGGTTGGCTCTGCGGACTCCGCGTCCGTCTGTGACACCCCCTGCACACTTACC  
CAATCCTTTTAGATGCCAAGATTCGCATTTTGTGACCTGGGGCGGAAAAAGGCAAAAGT  
GGATGAGTTTCCGCTTTGTGGCCA

>2223

TGGAGATAGTCGTGGTGAATGTTTCTCTATTATCTTCTCTCACTTTGCTGCTTTTCTTCTC  
CCTACCTAGCCCTGGAGGCTGCCCCGAATTTGTGCCAATAAGTACATGGTAAAAAGTTGT  
GGCAAAGATGGCTTCCATAT

>2224

CTAAGGGACCTTGGAGACAGGCCTTTCAGGTGGATGTTTCATGTTTCTGACCTTGCACTA  
CCCCAATGTAGGCTCCAAACAGGCATGCGAGGTGCCTTTGGAAAGCCCCAGGGCACT  
GTGGCCAGGGTTCACATTGGCCAA

>2225

GTAGTGCTGCAGCCCCCTTCTCCACCTTTGCCCCAGCCTCCTGACTCAGTTCTTTCCA  
TTGCTCCTTAGATCCACATCTCAAAGAAGTGGGGCTTCACCAAGTTCAATGCTGATGAA  
TTTGAAGACATGGTGGCTGAAA

>2226

ACGCGATGGAATCTCGTGTTGCCTCTGTAGACGTCCTGCAAGGTTTTAAACCGGCGCG  
GTGTCGTTCCAGATGCCTGAGGAAACCCAGACCCAAGACCAACCGATGGAGGAGGAG  
GAGGTTGAGACGTTTCGCCTTTCAGG

>2227

ATCGGATTTTGGTTTTCAGTGTGAACTTCTTGGGGGTGCTGTATGCTTAAATTAATATTTT  
TTGTAAACAGGCATTGGACAAAATCCGGTATGAAAGCTTGACAGATCCCAGTAAATTAG  
ACTCTGGGAAAGAGCTGCATA

>2228

GGTGTTAGGCATGGCGTTGAGCACTAAATTGAATGTATTATTAAGTCAATCTTTCTTTCT  
TCTCTTGCAGGTGAACCTATGGGTCGTGGAACAAAAGTTATCCTACACCTGAAAGAAG  
ACCAAAGTACTTGGAGGA

>2229

AATAGTGGTGCAGCGCTGTCGCTTAGTTCTGGAGTGCAGCAGTGATGTGATTTTCGTGTT  
TTCTTTTGAAGGTGGAGAAGGAACGTGATAAAGAAGTAAGCGATGATGAGGCTGAAG  
AAAAGGAAGACAAAGAAGAAGAAA

>2230

TTCTCCACCACCCCAAATATCTTCTATAATGCATTGTTTCATTGGTACTTAGTGTATCTGTT  
TTATTACAGCATTTTTTCAGTTGAAGGACAGTTGGAATTCAGAGCCCTTCTATTTGTCCCA  
CGACGTGCTCCTTTTGATC

>2231

TTTGGGAGTTTACATAGTACCAGTTTTGTCCTTGAATGACTCAGTGCATTTGGTTTATA  
TTTTTTTTCAGACTTCATTAGAGGGGTGGTAGACTCGGAGGATCTCCCTCTAAACATATC  
CCGTGAGATGTTGCAACAAAG

>2232

ATTGGCCTCTTTAGTTTTTTTTTTTTTTTTTTAATTCAGAAAGTCTTTTAAAGAACATACT

TTGTTTCAGCTTGGAATACACGAAGACTCTCAAAATCGGAAGAAGCTTTCAGAGCTGT  
TAAGGTACTACACATCTGCCT

>2233

GAAAAGTCAGAGCTAGATGAAACCATCTTAACTGTAAAAAGGTCTAAAAGTAACTTT  
GTAATACCTCAGGTGAGACCAAGGACCAGGTAGCTAACTCAGCCTTTGTGGAACGTCT  
TCGGAAACATGGCTTAGAAGTGAT

>2234

GATTTTCATTTACAAATGAAAGTTTAGGATTAATCTTTCTAGGTTCCCTAGTCATCACTTTTT  
GGATTACAGGTGGTTGTGTCAAACCGATTGGTGACATCTCCATGCTGTATTGTCAACAAG  
CACATATGGCTGGACAGCAA

>2235

ACCAAGAGTATTACCCTAATAGCTGGCTTTAAGAAATCTTTGTAATATGAGGATTTTATT  
TTGGAAACAGGTATTGATGAAGATGACCCTACTGCTGATGATACCAGTGCTGCTGTAAC  
TGAAGAAATGCCACCCCTTGA

>2236

TGTAGCTTGGGCAACAGAGCAAGAGTCTGTCTTGGAAGAGCAAAAGTAAGTTGCTG  
TTTGTATTTCCAGGCCTTGGACAAGATTCGCTATGAGAGCCTGACAGACCCTTCGAAGT  
TGGACAGTGGTAAAGAGCTGAAAA

>2237

TCATACTTATCTGTGTTCTTTGGTTTTTTGCTTCTTTAAACTTGTGATTGACTTTAAACT  
TGTTGGCAGGCTGGTGCAGACATCTCCATGATTGGGCAGTTTGGTGTGGCTTTTATTC  
TGCCTACTTGGTGGCAGAGA

>2238

ACTTACTAATTGCTGGTCTCAACTGCATATACTTTTTACCCTGTTACACGCTTGTAATTG  
ACTCTTCTAGGTGAGCCCATTTGGCAGGGGTACCAAAGTGATCCTCCATCTTAAAGAAG  
ATCAGACAGAGTACCTAGAAGA

>2239

TTGTCCTTGGCTTTTGCTTTCCCTGGTAGTGTTTTGTACTCCAAGGCTAACTTCTGTTTT  
TGTTACTTAGTTGGAGAAGGAACGAGAGAAGGAAATTAGTGATGATGAGGCAGAGGA  
AGAGAAAGGTGAGAAAGAAGAGG

>2240

TTAGATAATTTGGTGTGTTGGGGCTAAAAGGTCCTCTTTTGAAATGTACCACTTATTTTTGG  
TTTCTTTCAGCACTTTTCTGTAGAAGGTCAGTTGGAATTCAGGGCATTGCTATTTATTCC  
TCGTCGGGCTCCCTTTGACC

>2241

CTGTTTGAATCTGGGGACCAGGTCTGGTCTAGCTGTTTTTACTGAGCTTCTCACCCCTG  
GTTGATGGCAGATTTTATCCGTGGTGTGGTTGACTCTGAGGATCTGCCCCTGAACATCT  
CCCGAGAAATGCTCCAGCAGAG

>2242

ATTCCATTACATTGAAAGTGAAGTTATTGTAGTTAAGCTGGATTGTTTTTCTCTTCCC  
ACCCTTCAAGCTTGGAATCCACGAAGACTCCACTAACCGCCGCCGCTGTCTGAGCTG  
CTGCGCTATCATACCTCCCACT

>2243

CAATTAGGGCTTCCTGGGAACTGGCAGTATGAGGCATTTTAGTCACTGAGTTCATTTAA

TTACCCTACAGGTGAGAGCAAAGAGCAGGTGGCCAACTCAGCTTTTGTGGAGCGAGT  
GCGGAAACGGGGCTTCGAGGTGGT

>2244

AGGCTTGACAATGCCTGTTTTCTCTTTCAAAGTGGTAATGTCAATCTAAGGCTTTTGTG  
ATCGTCCACAGGTGACAATCTCCAATAGACTTGTGTCTTCACCTTGCTGCATTGTGACC  
AGCACCTACGGCTGGACAGCCA

>2245

AACTCGTCTCCTCTATGGATTTGACTTAATGCTATTTGGTCAAGTCTCACATGGCTTAAT  
TTTACTTCAGGTATTGATGAAGATGAAGTGGCAGCAGAGGAACCCAATGCTGCAGTTC  
CTGATGAGATCCCCCTCTCGA

>2246

GGCGAACAAGCCGAGGGGCGGAGTGGGCCAGGGATCACCTGCCCCGCAATGACCTGC  
GCCCCGCCCCCAGGCCTGCTGGAGCTCTCGCCCGTGGAGCGGGGCGTGGTGAGCATC  
TTCGGCGTGGCCAGCCGTTCTTCGT

>2247

CCCCTGGCTTCAGGCTGGGTACCTTGCCCAAGAGGTGCCCCAGCCCTGACACTGCCCT  
GCTTTGCTGCAGCCCTTCTTCACCGATGAGTGCACGTTCAAGGAGATTCTCCTTCCCAA  
CAACTACAACGCCTACGAGTCCT

>2248

TTTTAAAAATTGTGCTACAGGTGAGAGGTTGAGAAATGGATGCAAACCATCGTCTGTG  
TTCTCTTCTAGTGCAGGTACCCTTCTCCAGATGTTGCTTCTCATTTGCGGAGCAAGAG  
ATTCCCCTGAGGGCAATCCTGTG

>2249

GGGGCTTGTGCGTTGCCACCCAGTGGTGGCTTGGGTGGCTCAGCCTTCTCTCTTATTC  
TCTGTTACAGATTCAAGCTGAAGAGAGGCAAAGAGGCCTGCGCCTTGGACACAGTT  
GGATGGGTTCAGAGGCACAGAAAA

>2250

TTAAGATTTTACAAGACTGTGATAGATATTGATGACTCTCATGTGTTTGTCTCTCTTGG  
GCGTTTTAAGGAAATGCTAGTGAGTCGGAGGAAGACCGCAGCGCCGGCAGTGTGGAG  
AGCCCGTCCGTCTCCAGCACGCA

>2251

AAGATTTTAAAGCACACATTCTAGAGTAAAACTGTGACTCTGTTGCTCTGGTCCTTC  
CTGATCCCCAGGGTCCCTGCCGTAGAGAAATGGAAGACACACTGAATCACCTGAAGTT  
CCTCAATGTGCTGAGTCCCAGGG

>2252

CGCCCTGGCCACCGACCTGACACCAGACCCAGGAGCATTCACTTCTCTGTCTTCTGTT  
TCTCTCCACAGTGTGCGCCCTTCCAAAGGCAGGAAGCGGGGCTTCTGCTGGTGTGTGG  
ATAAGTATGGGCAGCCTCTCCCAG

>2253

CTCAGACTCAGCCCCAAAGTCTGTGGTCTCTGACCTGACACAGCCTTATGTGTATGTGT  
GTATTGTTCAAGAGGAGATGATCTTCCAGATCCCATGGAAGCATGCTGCCAAGCATGGC  
TGGGACATCAACAAGGATGCCT

>2254

CTTCAGCCAGGGGCAGCTGAGGATCCCTACCCATGGCCCTGACGATCCTCTTTTTTCTC

CTGCCCTCTAGGCCGATACAAAGCAGGGGAAAAGGAGCCAGATCCCAAGACGTGGAA  
GGCCAACTTTTCGCTGTGCCATGAA

>2255

TGTGGGCCAGGGTGAGCAGTGGAAGAAATGCTAAGGTGGCCTGGGCCTAAGCTGCTT  
TCTCCCTCGACAGTCATGTGGGGATTCCAGCCCTGATACCTTCTCTGATGGACTCAGCA  
GCTCCACTCTGCCTGATGACCACA

>2256

GGAGGGCGCTCGATGTCTTGCAAATAAGAAAGCACACAACCTTGACCTGTGGCTTCT  
GCTGTTCCCCAGCACTGTCGCCATGTGCTGTCAGCAGCACTCTCCCCGACTGGCACAT  
CCCAGTGGAAGTTGTGCCGGACAG

>2257

ATTGAGGCAGGGCCACAGGGTGAGTCTGCACTGGAAGGGAGTTGATAGCCTCTTGCTC  
TTCTGTCCCCAGCTCTTGAGCAGTCGGAGTGGCAGCCAACAAACGTGGATGGGAAG  
GGGTACCTACTCAATGAACCTGGAG

>2258

CAGGGGTAGGGGGAAGCACACCTGATGCCACCGTCCCCTACCCTCATACAACCTTCTT  
CACATCTTCTAGGGGATATTGGGCTGAGTCTACAGCGTGTCTTCACAGATCTGAAGAAC  
ATGGATGCCACCTGGCTGGACAG

>2259

TTAAGCCTAGACAGTTTTCAATGACTTTTTTCTCTCTACATGTCTTTTCATATTTTATC  
TTCTTGAAGTCCCTCAGAAACCTAAGGTCTCCTTGAACCTCCATGGAATAGAATATTT  
AAAGGAGAGAATGTGACTCT

>2260

TCTCTTTTCTCTATTCTCTCTCTCTCTTCATTTATTGTTAAATAAATAATGTAATGAATG  
TTCTTCAGACTGGCTGCTCCTTCAGGCCTCTGCTGAGGTGGTGATGGAGGGCCAGCCC  
CTCTTCCTCAGGTGCCATGG

>2261

AAACTCTGAACCTCATTTTTTCAGTTCCCAAGATGAATTATGTTTCTCATTGCATCTGTGT  
TCCACTACAGCTCCGCGTGAGAAGTACTGGCTACAATTTTTTATCCCATTGTTGGTGGT  
GATTCTGTTTGCTGTGGACAC

>2262

GATCTCCTGGGGGCCGAAAGGGGCAGATGCTTTGGGAGGGCTCATGGGGTCTGCAATG  
TTTCCTTTCCAGAGGCAGGGAGCCCTGAAAGCCCAGAGAGCACGGAGATAACTGAGG  
AGGAGCTCCTGGATAATTTCCATCT

>2263

ATCTCCTGGGGGCCCCGAAAGGGGCAGATGCTTTGGGAGGGCTCATGGGGTCTGCAATG  
TTTCCTTTCCAGAGGCAGGGAGCCCTGAAAGCCCAGAGAGCACGGAGATAACTGAGG  
AGGAGCTCCTGGATAATTTCCATCT

>2264

ATCAGTCATTGTCTAGGCTGATAATTCAGTGTGTCTTGTTAGATATGCTAATGTCAAGTTA  
TTCTCTTAGGAGCCCTGCCGAATAGAACTCTACAGAGTCGTAGAGAGTTTAGCCAAGG  
CACAGGAGACATCAGGAGAAG

>2265

GCCAGCTATGGCTCTACTTTCCCTGTCAGCTTGTGTCATCTGCTGCTCTTGACCTTGGTCTT

GTCTTTGCAGTGTGAGACATCCATGGATGGAGAGGCGGGACTCTGCTGGTGCGTCTAC  
CCTTGGAATGGGAAGAGGATCC

>2266

CTCTCTGATGTCAAAGCATGGTTCTTGGCAGGACCACCTCACCAGGCTCCCTCCCTCG  
CTCTCTCCGCAGTGCTCCTTCCAGGACCTGGACCTCTGCCCTCTGGATGGCGGCATCCA  
GCTACGAATCTCCGACCACCACT

>2267

TTTGCCGCCTCGCCTCACGAGGCCTGCCCTTCTGATTTTATACCTAAACAACATGTGCT  
CCACATTTCAGAACCTATCTTCTTCGACACATGGGATAACGAGGCTTATGTGCACGATG  
CACCTGTACGATCACTGAACTG

>2268

ATGGGGCCTAGGGGTTGGGGTGACCCTGCACTGCTGTGTCCCTAACCACAAGACCCCC  
TTCTTTCTTCAGTGGTGTTCTCCATGTCCTTTGTACAAGGAGAAGAAAGTAATGACAAA  
ATACCTGTGGCCTTGGGCCTCAA

>2269

CCAAAGAACATCTTTCCCATAGCATCTTTGTCCCTTGCCCCACAAAAATTCTTCTTTCTC  
TTTCGTGCAGAGTGTAGATCCCAAAAATTACCCAAAGAAGAAGATGGAAAAGCGATT  
GTCTTCAACAAGATAGAAATCA

>2270

AAATAAATTGGAAATTAATTTCTGATTCTGACCTCTATGTAAACTGAGCTGATGATAATT  
ATTATTCTAGGCCACAGAACTGAAACATCTTCAGTGTCTAGAAGAAGAACTCAAACCT  
CTGGAGGAAGTGCTAAATTTAG

>2271

TCAATTGGGAATAACTGTATATAAGGTAAACTACTCTGTACTTTAAAAAATTAACATTTT  
TCTTTTATAGGGATCTGAAACAACATTCATGTGTGAATATGCTGATGAGACAGCAACCA  
TTGTAGAATTTCTGAACAGAT

>2272

CGTGCTTGGCCTCCTCCTTCTGACCATCATTTCTCTTTCCCTCCCTGCCTTCATTTTCTCC  
CCAATCTAGATTTCTTCTGACCACTATGCCCACTGACTCCCTCAGTGTTTCCACTCTGC  
CCCTCCCAGAGGTTCAGTG

>2273

TAGGCTCTGGATATCTGCAGTACCCAGATTGGCCCCACTGTTCCCTCTTCCCTCCAACCTT  
TCTCCTCTAGGTACAAGAACTCGGATAATGATAAAGTCCAGAAGTGCAGCCACTATCTA  
TTCTCTGAAGAAATCACTTCT

>2274

GGGGCACTACCTTCAGGATCCTGACTTGTCTAGGCCAGGGGAATGACCACATATGCAC  
ACATATCTCCAGTGATCCCCTGGGCTCCAGAGAACCTAACACTTCACAAACTGAGTGA  
ATCCCAGCTAGAACTGAACTGGAA

>2275

TTCAGGAGTATGTTTTAATTCTCCCTTCTCTCATAGACACCCACTTTCCCTCATCCTCTTT  
CTCCTCAAGGAACAATCAGTGGATTATAGACATAAGTTCTCCTTGCCTAGTGTGGATGG  
GCAGAAACGCTACACGTTTC

>2276

GCAACAGTGCCTGGCATGTAGTAGGGGCACAACAAATATAAGGTCCACTTTGCTTTTCT

TTTTTCTATAGAGAATCCTTTCCTGTTTGCATTGGAAGCCGTGGTTATCTCTGTTGGCTC  
CATGGGATTGATTATCAGCCT

>2277

GACAACTGGGAGAAGGGTGATAAAAAAGCTTTAACCTATGTGCTCCTGCTCCCTCTTT  
CTCCCCTGTCAGGACGATGCCCCGAATTCCCACCCTGAAGAACCTAGAGGATCTTGTT  
ACTGAATACCACGGGAACTTTTCG

>2278

TTTGGCACAGAGCTCGGTCTTTTACTTCCTGCCCCTAATTGACCCCTGACCTGGACATA  
TCTGTCTTTAGGCCTGGAGTGGTGTGTCTAAGGGACTGGCTGAGAGTCTGCAGCCAGA  
CTACAGTGAACGACTCTGCCTCG

>2279

GAGGAAAAATCTCTCTCCCATCCTCCAAATGGAGCTGGCACATTGCTATCTGTGGCATT  
TGTCTTTCCAGAACACAACCTGAGAAGGAAACCTTCTGCAGGGCTGCGACTGTGCTCC  
GGCAGTTCTACAGCCACCATGAGA

>2280

CTTGATCAAGTAGACAGGCAGGCAAGACAAATGCTTACCAATGCAAGCTAATGAAATG  
TTTCTTTTGCAGAAATTCCTGTCTGTGAAGGAAGCCAACCAGAGTACGTTGGAAAAC  
TCTTGGAAGGCTAAAGACGATCA

>2281

GAATGGACAATGGACCAAATTTTTATACCTTGTCTTGATTATTTGCATTTTAAAAATTTTC  
CTCATTTAGCACCAACTGTGCACTGAAGAAATCTTTCAGGGAATAGGCACACTGGAGA  
GTCAAACCTGTGCAAGGGGGTA

>2282

CTGGCTGTGCCTATTTCTATGGAATTGACAGTTTCCTGTAATACCTATTGTCATTTTTCTT  
TTTTACAGAAAAAGTGTGGAGAAGAAAGACGGAGAGTAAACCAATTCCTAGACTAC  
CTGCAAGAGTTTCTTGGTGTA

>2283

TAGAAGGAAGTAGCTGGCAGAGCTGTGCCTGTTGATAAAATCAATCCTTAATCACTTTT  
TCCCCAACAGGTGCAGTTTTTGCCAAGGAGTGCTAAAGAACTTAGATGTCAGTGCATA  
AAGACATACTCCAAACCTTTCCA

>2284

GACTTTTCAAGAACCCTACTTTCCTTCTTATTAAACATAGCTCATCTTTATATTTTAATT  
TTATTTTAGGGCTGAGAATTCATAAAAAAATTCATTCTCTGTGGTATCCAAGAATCAGTG  
AAGATGCCAGTGAAACTTC

>2285

TGCTCTTTGTGATATATTTCCAAAGCTGTCCCTCAGAATATTTCTTTGAATAAATCCTTACT  
ATTTACCAGGACAACCTGCACCAGACCATGCTTCAGTGAGAGACTGTCTCAGATGACCA  
ATACCACCATGCAAACAAGAT

>2286

TAGGCTTCTGGGGCTGCTTGGCTCTACATCATTTGAGTCACTCTGTCCTTATCAACTTTC  
ATCCCCACAGTATTTTTCCTGTGAACAGCCATGCAACCAAACCACGGCAGGCAACGCG  
CTGACATTTCTGAAGAGTCTTC

>2287

CAGAGCTCTCACGCTACAGCTGACAGGCAGGGCAGGCGTTTTAATTATTATTAATTTTT



TTTTGAGACAGAGTTTGAGACAGTATCAAGAGTGGGTATCCTCTCAGCGTGTCTTCAA  
GTAGCATCCCAGAGCCCCGCTCC

>2288

GGGCAGCAGTTGTCCATTCTGGGGCCTGGGTGAGCTCTCAGCTGTGGCCGTTGTGCCT  
GTGCTTCCCCAGGTCCTGGTGGTGACTCCAACCCTGCCCTCACATATCCCAAGAGCAG  
GCTGACTGCCTTCCCCATTCCCAC

>2289

AGCAATTCATGGGGAGCACCCCTCCAGAGAGGGATGATTTGCACAGGGCCCTCAGCCC  
AGTCCCTTGCAGGCTGGACCTTGGAGAGTGAGGCCCTGAGGCGAGACATGGGCACCT  
GGCTCCTGGCCTGCATCTGCATCTG

>2290

CTCCCCAACCCCCGAGCTCAGCTCTGGCCTGAAGTACTTACCGTGGGCTCCTGATGGT  
CACTGTCTCCAGGGCCAAGGTCTAGAACCTTCACCTGCCTCACCAACAACATTCTCAG  
GATCGATTGCCACTGGTCTGCCCC

>2291

TCCCCAGGATTGAAGCAGCTATGCCAGGACAGTGTAGCAGCCCCGTGGTGCTGACAAA  
TGCCCTTTCCAGCAACCAGGCTCCTGGCGGCACACATAAGTGCATCTTGCGGGGCAGT  
GAGTGCACCGTCGTGCTGCCACCT

>2292

TCTTGTGTGTTCTGACTGACACACCCAGACCCATGGGGCTTCAGCCTCACATGGATTCA  
CTCTGTTCCAGTTAAGCTGGACCCGCCCTCTGACTTGCAGAGCAACATCAGTTCTGGC  
CACTGCATCCTGACCTGGAGCAT

>2293

GTGTGTATTCTCGAGGGCTGAGGGACCCAGCCCCACCTTCACCACCTGCTAACTGTCC  
CCACCCCCACAGCAGGCCCAGCACAGGGATCACATTGTCGGGGTGACCTGGCTTATAC  
TTGAAGCCTTTGAGCTGGACCCTG

>2294

GCCAGGTGGGTTTGGGGGGAGCCTCCTGGCACTGAGGCTGCTCACAGCCCTGGGCCC  
TTCCTGTCCACAGGCCCTCTGATCCCACCCTGGGGGTGGCCAGGCAACACCCTTGTTG  
CTGTGTCCATCTTTCTCCTGCTGAC

>2295

CTCAGCCTCTGCAGTGACCTCAGGCCACCTGGGTCGCCATAGGCCTCTGACTGGCCTC  
TCTTGGCCTCAGGGTGAAGAGAATCTTCTACCAGAACGTGCCCTCTCCAGCGATGTTT  
TTCCAGCCCCTCTACAGTGTACAC

>2296

GGCAGCTGCTCCCAGGATGAGTTCTGAACATGCTACCTGAGCCCTTCCCTCCTCCCGTG  
CTCTGTTCCAGACTTGATGGGGGCCACGGGGCCGGTGTGCTGTTGAGCCAGGACTG  
TGCTGGCACCCACAGGGAGCCT

>2297

GTGGGGGACTCAGTAACACCTTGAGGTGTAAGGGATGCTTTCCCACACTGGTTGACGT  
TTGTCTCCTCAGGACCTGACTTCTGCTCTGACCAAGAAAATCACTCTTAAGACCCCACT  
GGTTTCCTCTCCCATGGACACAG

>2298

CATCGCCTTTCCCCAAAGGCATTGAGTCCTGCTTCTTGCTCACTTAGTAGTAGTCTCTTTT

TATCCTGTAGCTTACAGGCGGTATTGGCTTCATCCACCACAACTGTACACCTGAATTCC  
AGGCCAATGAAGTTCGGAAAG

>2299

ATGCTTCAGATCAAGAGCCTGATGAAAGTAGTTCAAAGATGCGATGCCCTTTCTCACCA  
TCCCTTTCCAGAAATATGAACAGGGATTTCATCACAGACCCTGTGGTCCTCAGCCCCAA  
GGATCGCGTGCGGGATGTTTTTG

>2300

GAAGGAAAGAAAAGAGTTAACTGGTCATAGTCGATGACTGGCCCTTCTTCACATCTCA  
CCTCCCACGTAGATAATGACAAAGAGGGAAGACTTGGTGGTAGCCCCTGCAGGCATCA  
CACTGAAGGAGGCAAATGAAATTC

>2301

AGTCCTAGAGCTGGGAAAGGGCCTGGAACCTAATGCCTAGGGTCCTGATTCATGTCCTG  
CCCTGACCACAGGAAAGTTGCCATTGTAAATGAAGATGATGAGCTTGTGGCCATCATT  
GCCCCGACAGACCTGAAGAAGAA

>2302

GCTACACAGGTGGGTGTTGGGGCAATAGGGGCAGCTGCCACATGACAGTCTGAGACTTAC  
TTCTTGTCTAGACTCTTCCCAGGGAAATTCCATCTTCCAGATCAATATGATCAAGTACA  
TCAAAGACAAATACCCTAATCT

>2303

GTGGTGGGAGTGGGTAAGCTGGGCTCCACCTTAACCTTCACATGAGCATTTCCTTTC  
CTTCACCATAGTGGTCACTGCTGCCAGGCCAAGAACCTCATTGATGCAGGTGTGGAT  
GCCCTGCGGGTGGGCATGGGAAG

>2304

AATATGGCCACAGGGTCCACTGCCCCGTCCCCATTAACCCTATCCACCCATGTGTTTCCTC  
CATCTCAACAGTGCTGGCCTGTGGGCGGCCCAAGCAACAGCAGTGTACAAGGTGTC  
AGAGTATGCACGGCGCTTTGGTGT

>2305

CCACCCTAATCCTGCACTGACAGTCTCATCTCTGCTGTGACCTTGCCCCGTGTCTCTGCC  
TCTCCCTGCAGTGAAGCTGACAAAATCAAAGTGGCCCAGGGAGTGTCTGGTGTCTGTG  
CAGGACAAAGGGTCAATCCACAAA

>2306

GGAGCTGGGACATGGGTAGAGGGGCTGGTCCAGGGCCAGCTACCCACATTTGACCTCT  
GCCCTTCTTCAGAGCCATGATGTACTCTGGGGAGCTTAAGTTTGAGAAGAGAACGTCC  
TCAGCCCAGGTGGAAGGTGGCGTC

>2307

TCAGCCACAGTGAAGTGCCTGTGAGTGCATGAACTGATGGGGGCGCTGTCTGTTTTTC  
TCCTGTGTGCAGACCGTTGGGGGGGTGAATTACTTCTTCGACGTAGAGGTGGGCCGAA  
CCATATGTACCAAGTCCCAGCCCCA

>2308

TCTCATGCCTGGGCATCTTCCCCTTTAACTGTAACCCACACTGATTGGCCCTCTCTCTTC  
CCTTTCACAGAAACAGTTGTGCTCTTTCGAGATCTACGAAGTTCCTGGGAGAACAGA  
AGGTCCCTGGTGAAATCCAGGT

>2309

ACAGTAGCATCGCCTCCCTCTGAGTTCTTCTTCCCAGCCCCAACTTGGACACCTGTGCCT

TCCATGAACAGCCAGAACTGCAGAAGAAACAGTTGTGCTCTTTTCGAGATCTACGAAGT  
TCCCTGGGAGGACAGAATGTCCC

>2310

ACTGTGTCCTCCTGTGTCCCTCTGCCTCGCCGCTGTTCCGGAACCTGCTCTGCGCGGCA  
CGTCCTGGCAGTGGGGCAGGTGGAGCTGGGCGGGGGCCCTGGTGCAGGCAGCCTGCA  
GCCCTTGGCCCTGGAGGGGTCCCT

>2311

GCGCCTGCTTTTCCTGGGCTCTAAAACTGGCTGCTCCTCCTGACACTGAGTAGGACCTC  
CAACTCTTACAGATCCCTTCCCCTGAAGTATTTGAAGAGCTGATCAAGTTTTCTTCCA  
CACTAACGTGCTTGAGGACAACA

>2312

CTCCCCGAGGGGCACACAGGGCCTCACTGTGAGCTCAGCCCCTGAACAGGCTCTGCT  
TCCCATCCTTCAGGTTCAACATCGGTGGCCCCACATCCTCCATTCCCATCTTGTGCTCCT  
ACTTCTTTGATGAAGGCCCTCCA

>2313

CAGGATAGAGAAGACAGGTGCTCCAGGGTCCTGACATGACCCCCATCCTGAAGGGCCT  
TATGTCTTCCAGGTGAACGCTATGGCTCCAAGAAGAGCATGGTCATTCTGACCAGCAG  
TGTGACGGCCGGCACCGCGGAGGA

>2314

CCCTCTCCTAGCCTTGTCCCTGGCCTCTCCTGCCAACCCTGCCCTTCCTGACCCAGCAC  
CGCCTCTGCAGGTGCTGCGCCCCGATTAGTCCCGGATTGTGGGAGGCTGGGAGTGT  
GAGCAGCATTCCCAGCCCTGGCA

>2315

CCATGCTCCCCTGCCCCATCCCCTTTTCCCCTTCCCGTCTTCTCATCCCTCCATTCCCATC  
TTTCCCCAGCAATTACCAGCTCTGGCTGGGTGCGCCACAACCTGTTTGACGACGAAAAC  
ACAGCCCAGTTTGTTTCATGTC

>2316

CGTCCAAGGGAGAAAGGGCCAGGGAAGCAGGTGAGGTGCGGGCTGCAGCCCTTTTTCT  
CCCGGGTTCGTAGTCTCATTCCAGATGATCTCCAGTGTGTGGACCTCAAATCCTGCC  
TAATGATGAGTGCAAAAAAGCCCA

>2317

TGGGGCTCCCCAGGCAGAACTTGGGCCCCGTAGACCTTTCTCACTCTCCCCTCCCACC  
TTGTGCTCCCAGGGTGATTAGGGGGGCCGCTGATGTGTGATGGTGTGCTCCAAGGTG  
TCACATCATGGGGCTACGTCCCTT

>2318

CACAGCTCAGCTCCCTCCCCTATCCAATTCTTTTGGGTCTGATCCCCCTGACCCAGCAC  
CCCCTCCGCAGGTGCCGTGCCCCCTATCCAGTCTCGGATTGTGGGAGGCTGGGAGTGT  
GAGAAGCATTCCCAACCCTGGCA

>2319

TATCCTCCCCTGCCCCATCTACCTTTCCCCATTTTCTCTCTCCTCATGCATCCACCCCCTT  
CCTCCCCAGGAATAGCCAGGTCTGGCTGGGTGCGCACAACTGTTTGAGCCTGAAGAC  
ACAGGCCAGAGGGTCCCTGTC

>2320

GGTCTGAGGGAAGTGGGGCCAAAGAACCAGGTGGGGTCCGGCCACAGCCCAGTTTTT

CTCTGACCCATAGTCTTGCGCCCCAGGAGTCTTCAGTGTGTGAGCCTCCATCTCCTGTC  
CAATGACATGTGTGCTAGAGCTTA

>2321

AGAGATGGAGTTGCCTAGGCAGTTATTGGGGCCAATCTTTCTCACTGTGTCTCTCCTCC  
TTTACCCTTAGGGTGATTCTGGGGGTCCACTTGTCTGTAATGGGGTGCTTCAAGGTATC  
ACATCATGGGGCCCTGAGCCAT

>2322

CATTCCTGGCTGGAGGACTAGCTCTGTGGCCTGCAGATGTCCTGTACCTTCTTTTCAT  
CTTCCCTTCAGCCCTGTGGGAGAAACCATTCAATTCCTCAAGGACCACTCCCAAAGAC  
TTCTATGTTGATGAGAACACAAC

>2323

GGAGGGCTCTGCCCAGCAGGGATCCTGGCTTGTTCAATTAATCTAATGTTCTAACTCAAT  
GCCCCTTTCAGGAATTTTACAAGAAGCTAGAGTTGCATCTTCCCAAGTTCTCCATTTC  
TGGCTCCTATGTATTAGATCAG

>2324

GGCTCTCGCAGTCTTGTCCAGGCCCCCTCTCTTGCTGGCTTGGAGATAATGCTTGTGAT  
TTTCTCCAGAGTTTCCACAAGGCCACCTTGGACGTGGATGAGGCTGGCACCGAGGC  
TGCAGCAGCCACCACGTTTCGCGA

>2325

TGTAGGCTACAGTGAAGTCCAGCTTGTGAAGTCCATTTGACAAATTACCTGTGCCTTTT  
CCATCCTGCAGATTCTCACAGCCACAGTGGACAATGCCAATGTCCTTCTGCAGATTGAC  
AATGCCCGTCTGGCCGCGGATG

>2326

GGAGAAGAGAACAAAGCCCTCGCTGTGATCAGGATGGGTGTCTCATACCTTTTCTCTG  
GGGTCATTCCAGGTATGAGACAGAGTTGAACCTGCGCATGAGTGTGGAAGCCGACATC  
AATGGCCTGCGCAGGGTGCTGGAC

>2327

TTCAGGCCTAAGGAACACCAATCCGCTGCCATGGTGGAACCTCCTGACTGTGGACTGTC  
CCTGGCTTGCAGGAGATGAATGCCCTGAGAGGCCAGGTGGGTGGAGATGTCAATGTG  
GAGATGGACGCTGCACCTGGCGTGG

>2328

GAGGTGGAAGGAACCCAGACCACCTGCCTTCTGGGGCCTTCTGGTGTGAATGGCATTTC  
TCTTTTTTGCAGACAGAGGAGCTGAACCGCGAGGTGGCCACCAACAGCGAGCTGGTG  
CAGAGCGGCAAGAGCGAGATCTCGG

>2329

GTGCACCCAGGACTGGCAGGGAGAGAACGGCCACACTACTAATCGTTGATTCCCTTC  
CCTCCCTCACAGAAAGCATCCCTGGAGAACAGCCTGGAGGAGACCAAAGGTGCTAC  
TGCATGCAGCTGGCCCAGATCCAGG

>2330

GCCTCCTTACTCCTGATTAGTCCATTGTCTGTCCACCTCTGGTAACGTCCTCTTCCCACC  
TCTTCCCCAGTGACCTCCTCCAGCCGCCAAATCCGCACCAAGGTCATGGATGTGCACG  
ATGGCAAGGTGGTGTCCACCCA

>2331

TGGGGCACGGTTCTCCATGGCTATGAGACTCCATTTATGCATCAGGAGTAAAGGGGTCT

TGTGTTTTTAGGTGAGGTTCCCTGGAGCAGCAGAACCAGGTACTGCAAACAAAATGGG  
AGCTGCTGCAGCAGGTAGATACCT

>2332

TCCCTCACAGGTAATGAGAGGGACCTGCCCTGGAGAGAACGTGCCTTCATGATGTCCC  
TTGTTCCCTCTAGGATGTGGATGGTGCTTATATGACCAAGGTGGACCTTCAGGCCAAACT  
TGACAACCTGCAGCAGGAAATTG

>2333

GACTGCTTCTCTGTCTAAGTTGTTTTTGTTTTAGTGCTGTAAGAGTCACTAACCTATTAT  
TGTCTTGCAGGAGTTGTCTCAGATGCAGACTCAAATCAGTGAAACTAATGTCATCCTCT  
CTATGGACAACAACCGCAGTC

>2334

TCTCATGTATGTGTGCCTGTGCCATGCTGAGTTCTGCCTACATTTAACAAACGCTATCTA  
CCATCTTTAGTATGAAGAGCTGCAGATCACTGCTGGCAGACATGGGGATAGTGTGAGA  
AATTCAAAGATAGAAATTTCTG

>2335

GGGGAGACCAATTGGGATGGAGGCCTAGTGGGGAATGCATATTATGAGAGGGTGTTCAT  
ATTCTTTTTTTCAGATCTCCAACCTGCAGCAGTCCATCAGTGATGCAGAGCAGCGTGGCG  
AGAATGCCCTCAAGGATGCCAAGA

>2336

GGGGCATGTGCAGGCTTTGTTGGGCTGGAAACGGAGTTGAGGTTGAAAATAACTGAG  
CTTCCTCTTGCAGCTGTGAGCACAAGCCACACCACCATCAGTGGAGGTGGCAGCCGA  
GGAGGTGGCGGCGGTGGCTACGGCTC

>2337

ATATTACATGAAGGTTTTATTTTTCTTTTTGTCTCGACATCATTAATAAATGTACTTTTATTT  
TTATATAGATTTAAAAACCATTCATACTTCAACGGGAAAAAATCTTCTAGTTTCTGGATG  
GTGGGGCTTTGTTCGCCA

>2338

GGAAAGCAGGAAAAAATACATTGTAGTGATAATAAAAAATATCTAATACTGTGTACTATTA  
TTATCCACAGGTTTTAACCACATTCTGCCTTATTTCTACATAATTTATTTACCATGTTGC  
TTGTCCACCGAGAAGCTCG

>2339

CTCTCAAGCTCTATAGGTTTGAGCTGTGGAACAGTCCCAGTCCCCAAATGGGGATCTTG  
TTTTGTTTCAGACTTTGGAGAAGATTGAAGACATGGCTGTGTCCCTTATTCGAGAGGAG  
TGGCTTCTTGATCCATCACAGA

>2340

TCCTTTGTCCTAGCATAAAGAATAGGTTGTGACATTGGCTTGATGTTTGTTTATTACATTT  
TTATTTTCAGGTGGTGAGACCAGGAGTGAGAACAGGGAATTAGCTTCAAAACAGGTAAT  
ATCTACTGGAATCCAGCCACA

>2341

GGGGATCAGAAGCTGCCTGGCCTTTTCTTCTGAGCTGTGACTCGGGCTCATTCTCTTCC  
TTTCTCCACAGTTGCTGCTGACACGCCGACCGCCTGCTGCTTCAGCTACACCTCCCG  
CAGATTCCACAGAATTTTCATAGC

>2342

GGGGCCATGGTGGGCCCAGGATTCCCCTGCTGGATTCCCCAGTGCTTAACTCTTCCTCC

CTTCTCCACAGCTTCCTAACCAAGCGAAGCCGGCAGGTCTGTGCTGACCCCAGTGAGG  
AGTGGGTCCAGAAATATGTCAGC

>2343

AGAGGGATGGGCACAAATCGGTCAGGCCCAGTCAGGGGATTTAGCCTGATTTCTCTA  
TGTCACCTTCTAGGGAGAGAGATGGTGGATTACATCTGCCAGTACCTGAGCACTGTGCG  
GGAGAGACGTGTGACGCCAGACGT

>2344

TGGTCTCTGGAGAAAGAAAGCCTGCTGGAAATGCCTCCTGGTGCCAACTCTGTGCATG  
CTCTGCCTCCAGGTGGTACATTGGCAGAGCCCCCATATGCACGCCTACTACCCAGCCCT  
CACCTCTTGGCCCTCCCTGCTAG

>2345

TTTCTGGAGCTCGTGGGGGCACCTCAGTGCCCTGGGGCTGTGCAGTTTGAAGTTCCTT  
TTCCTTTCTCAGGCATCCAGCCCTGCGTGTACAGAGCTGGAGATGAACGTCATGGACT  
GGTTGGCAAAAATGCTGGGACTTC

>2346

ACTAGAAAGCCTGGGGAAATTTGGCAAGAGAATACAGAAAGGCTGCCATGATAATCCT  
TTTCCCCTGCAGAGCACGGTCAGTGAATCCACTTTGATTGCCCTGCTGGCAGCAAGGA  
AGAACAAAATCCTGGAAATGAAAA

>2347

CTTCAGCAGTTTCTGGGGGGTGATCATTCCAGGATGACTCTTTGCTGACAGGTTTCTGT  
GGCCCTTCTAGGCTCACTCCTCTGTGGAAAAGGCTGGTTTGATTTCCTTGTGAAGATG  
AAATTTCTGCCTGTGGATGACA

>2348

TTGGCCAGGTGCGAGACATCTTTCCCCACTTCATACCTCCCCTCCGGCCAGGTGATGTT  
TGCCTCCTCAGGTGCCCCGTGAGGGGCTGTGGCTCCACATCGATGCTGCTTATGCAGGC  
ACTGCCTTCCTGTGCCCCGAGTT

>2349

CGAGCACGCAGGAACGCCTTGCCTCCTCTGGAGAGACCTCAGCCACTAATGCCCATTT  
GGAAACCCACAGGGTCAAGGACAAGTACAAGCTGCAGCAGACCTTCAGTGTGAATCC  
CATCTACCTCAGGCATGCCAACTCA

>2350

GCCCAGAAATGCCCCGAGGGAGTGGGGCACCCCTTGTCTCTAACCTTGGGCACTGTGTTT  
CTTTGTTTCTAGCACTGGCAGATCCCCCTGAGCCGACGGTTTCGCTCTGTTAAACTCTG  
GTTTCGTGATTCGGTCCTTCGGGG

>2351

AGTCTGAAAGTTTATGCATAGTCTCTTGTCTGATGATTAATCTCAGTTCTCTTTATACTTG  
CAATTCCAGGGTACTGAAATGGCTAAATATTTTGAATCTCTGGTCAGAAACGACCCTTC  
CTTTGAAATTCCTGCCAAGA

>2352

CACAACTGGGCTCTGGGGATGCTGACAGGGGGTGCGATGGAGACTTCACTTCCTTTA  
TTTTTCAAACAGGGTCCTAATTGTCTCACAGAAAATGTGTTAAAGGAAATAGCTAAAG  
CTGGCCGTCTCTTCCTCATCCCCG

>2353

TATGGATGCAGCTGCCTCCGTAAGTATCCTCTTGCAGCTGGTCCAGCGATGCTCTCTTCT

CCCCTTCCAGGCTCTCCTTCCTTCTCAGACAAGATGTCTTATCAGAAAAAGCAGCCCAC  
CCCTCAGCCCCCAGTGGACTG

>2354

AGAAAGGAAGTAGCTGGCAGAGCTGTGCCTGTTGATAAAATCAATCCTTAATCACTTTT  
TCCCCAACAGGTGCAGTTTTTGCCAAGGAGTGCTAAAGAACTTAGATGTCAGTGCATA  
AAGACATACTCCAAACCTTTCCA

>2355

CTGACTTAAGGAATCATGATTTGAATGCAAAAATAAATATTAATCTGAACCATTTCTTT  
CTTATTTCAAGTGTAAGCTTTCTGATGGAAGAGAGCTCTGTCTGGACCCCAAGGAAAA  
CTGGGTGCAGAGGGTTGTGGAG

>2356

TGAGCTAAGCAGGTGGGAGCGGGGCACCTAGTCCTCCTCCCCACTGGCTGCCTTCTTT  
CCCACAGGTGAGTACCCCCACGTGCGGGTCCATGTGCCCGCCTCAGGCACAGGCAGA  
GGTGGGCCCCACCATGACTGAGAAG

>2357

TGGGGGGCAGTGGGGATTGGGGGCCAGGGTCCTTGCCCACAAGGACTTAGTGACCCA  
CGACCCCTTACAGTGTCTACATTGGGCCAGCAGGACCTTTAGCATCTTCCCTAGCAGC  
CGGTTGAAGCGGAGACCAAGCCAC

>2358

CGTGTCTAGCGGGAGGGCAGGAGGGGGCCGCCCTTTGCGCATGGCACCAACCCGGCCC  
TCCTTGTCACAGGGCACCAGCCCCAGAAGGTGGCCCGGCGCGTGTTACCAACAGC  
CGGGAGCGCTGGCGGCAGCAGAACGT

>2359

CTGTTCTCTCAAGGGTAGCCTGCATGGGTGGCTGCCCTGCCCCCAATCGTGGAATCTTT  
GCCCCTTCCAGGGTTTCAGAAGCTGCCAGAGGAGGAGCCAGAAACAGATCTCAGCCC  
CGGGCTCCCAGCTGCCACCTCAT

>2360

GCCACTTCCCCAGAAGTCCCAAGCCTTTAGGATCGCATTCCCAAGAGCGCGTCGGCCC  
GTGTCTCCGCAGGCGCTCCGCTGAAGGGGCAGGGGCTAGGCTGGGAGACGACGAAGG  
AACAGGCGTTTCTGACGAGCGGGAC

>2361

TAGGCCTTTGTTAGAGTCTCCAAGGTTCAAGTCTCAGCTGAGGCCTCTCACACACTCCC  
TCTCTCCCCAGGCCTGTGGGTCTTCATTGCCAGCTCCTGCCACACTCCTGCCTGCTG  
CCCTGACGAGAGTCATCATGTC

>2362

TGTCATTCTTCAGCCTCAGCATGTGCTGGCCGGCTGTACCCTGAGGCGCCCTCTCACT  
TGTTCTTCAGGTTCTGAGGAGACAGGCCCCGAGCAGCACTAGCTCCTGCCACACT  
CCTACCTGCTGCCCTGACCAGAG

>2363

CAAAGGGGTCAGCCCTGGACAACGCACGTGGGGGTAAACAGGATGTGGCCCCCTCCTCA  
CTTGCTTTCCAGATCTCAGGGAGTTGATGACCTTGTTTTCAGAAGGTGACTCAGGTCA  
ACACAGGGGCCCCATCTGGTGCAG

>2364

CTTTGTCAGAGCCTCCAAGGTTCAAGTTCAGTTCTCACCTAAGGCCTCACACACGCTCC

TTCTCTCCCCAGGCCTGTGGGTCTTCATTGCCAGCTCCTGCCCCGCACTCCTGCCTGCT  
GCCCTGACCAGAGTCATCATGCC

>2365

GGGCCTCTGTTGGGGAGGGAGGTCCCTGGGCAAGTTGGCTGTGACCTCTCATGCTCCT  
CTTCTTCCCCAGGCTGCTGCTCCTGCTGCCCCGTGGGCTGTAGCAAGTGTGCCCAAGG  
CTGTGTTTGCAAAGGGGCGTCAGA

>2366

AAGGAATATTCACGGAAATATTTCCAGCTATGTGTCGCTAAAACTGCATTTATTTATTTT  
CTGTTCTAAGATCCCTTCATTAACAGGAGAAATGCAAATACCTTCATATCCCCTCAGCA  
GAGATGGAGAGCTAAAGTCCA

>2367

TTCTTCTTTTCCATTTTTGTATTTTTCCACTTTATCCTTCTCAATTTTGGCCTCTTCTTCCA  
CTTCTAGGATCCGAGAACGCTCTAAGCCTGTCCACGAGCTCAATAGGGAAGCCTGTG  
ATGACTACAGACTTTGCGAA

>2368

CGGGGGCGCAGGACTCGGCAGCCGCGCCGGGAGGAGGGTCGGGCGGGTCTCAACCC  
CTCCTCGCCCCCAGGCTCCCACTCCATGAGGTATTTACAGCGCCGCCGTGTCCCGGCCCG  
GCCGCGGGGAGCCCCGCTTCATCGC

>2369

AAATCCCCGCGGGTGGGTCCGGGCGAGGGCGAGGCTCGGTGGGCGGGGCTGACCGA  
GGGGGTGGGGCCAGGTTCTCACACCTCCAGTGGATGATTGGCTGCGACCTGGGGTCC  
GACGGACGCCTCCTCCGCGGGTATGA

>2370

ACATCCAGGTGCTGCTGGAGTGTCCCATGAGAGATGCAAAGTGCTTGAATTTTCTGAC  
TCTTCCTTTCAGACCCCCCAAGACACACGTGACCCACCACCCTGTCTTTGACTATGAG  
GCCACCCTGAGGTGCTGGGCCCT

>2371

TGAAGACCTTTAACAGGGTCGGTGGTGAGGGCTGGGGGTCAGAGACCCTCACCTTCA  
CCTCCTTTCCAGAGCAGTCTTCCCTGCCACCATCCCCATCATGGGTATCGTTGCTGG  
CCTGGTTGTCCTTGCAGCTGTAGT

>2372

TGATGGGCTGTTTAAAGTGTACCCCTCACTGTGACTGATATGAATTTGTTTCATGAATAT  
TTTTCTGTAGTGTGAAACAGCTGCCCTGTGTGGGACTGAGTGGCAAGTCCCTTTGTGA  
CTTCAAGAACCCTGACTTCTCT

>2373

GGGGGCGCAGGACCCGGGAAGCCGCGCCGGGAGGAGGGTCGGGCGGGTCTCAGCCA  
CTCCTCGTCCCCAGGCTCTCACTCCATGAGGTATTTCTTCACATCCGTGTCCCGGCCCG  
GCCGCGGGGAGCCCCGCTTCATCGC

>2374

AAAATCCCCCAGGTTGGTCGGGGCGGGGCGGGGCTCGGGGGACCGGGCTGACCGCG  
GGGTCCGGGCCAGGTTCTCACACCGTCCAGAGGATGTATGGCTGCGACGTGGGGTTCG  
ACTGGCGCTTCCTCCGCGGGTACCA

>2375

CCACATGTGTGCTGGAGGAGTGTCCCATGACAGATCGAAAATGCCTGAATGATCTGAC



TCTTCCTGACAGACGCCCCAAAACGCATATGACTCACCACGCTGTCTCTGACCATGA  
AGCCACCCTGAGGTGCTGGGCCCT

>2376

TTTAGGGAAAGCAGGAGCCTCTCTGACCTTTAGCAGGGTCAGGGCCCCCTCACCTTCCC  
CTCTTTTCCCAGAGCCGTCTTCCCAGCCCACCATCCCCATCGTGGGCATCATTGCTGGC  
CTGGTTCTCTTTGGAGCTGTGAT

>2377

GGGGGCGCAGGACCCAGGGAGCCGCGCAGGGAGGAGGGTCGGGCGGGTCTCAGCTC  
CTCCTCGCTCCCAGGCTCCCCTCCATGAGGTATTTCTACACCACCATGTCCCGGCCCG  
GCCGCGGGGAGCCCCGCTTCATCTC

>2378

CAAAATCCCCGCGGGTTGGTCGGGGCAGGGCGGGGCTCGGGGGACCGGGCTGACCGC  
GGGGGCGGGCCAGGTTCTCACACCATGCAGGTGATGTATGGCTGCGACGTGGGGCCCG  
ACGGGCGCTTCCTCCGCGGGTATGA

>2379

CCACATGCGTGCTGGTGGAGTGTCCCATGACAGATGCAAAATGCCTGAATTTTCTGACT  
CTTCCTGTCAGACCCCCCAAGACACATATGACCCACCACCCCATCTCTGACCATGAGG  
CCACCCTGAGGTGCTGGGCCCT

>2380

AGGAAAAGCCGGAGCCTCTCTGGAGAGCTTTAGCAGGGTCAGGGTCCCTCACCTTCC  
CCCCTTTCCCAGAGCCATCTTCCCAGCCCACCATCCCCATCGTGGGCATCGTTGCTGG  
CCTGGTTCTACTTGTAGCTGTGGT

>2381

GGGGGCGCAGGACCCGGGGAGCCGCGCCGGGAGGAGGGTCGGGCGGGTCTCAGCCC  
CTCCTCGCCCCCAGGCTCCCCTCCATGAGGTATTTCCACACCTCCGTGTCCCGGCCCG  
GCCGCGGGGAGCCCCGCTTCATCAC

>2382

ATATCTCTTCTCAGGGAAAGCAGGAGCCCTTCAGCAGGTCAGGGCCCCCTCATCTTCCCT  
TCCTTTCCCAGAGCCGTCTTCCCAGTCCACCGTCCCCATCGTGGGCATTGTTGCTGGCC  
TGGCTGTCCTAGCAGTTGTGGT

>2383

CGGGGCGCAGGACCCGGGGAGCCGCGCCGGGAGGAGGGTCGGGCGGGTCTCAGCCC  
CTCCTCGCCCCCAGGCTCCCCTCCATGAGGTATTTCCACACCTCCGTGTCCCGGCCCG  
GCCGCGGGGAGCCCCGCTTCATCAC

>2384

CAAAATCCCCGCGGGTTGGTCGGGGCGGGGCGGGGCTCGGGGGGACGGGGCTGACG  
CGGGGCGGGGCCAGGGTCTCACACCCTCCAGAATATGTATGGCTGCGACGTGGGGCCG  
GACGGGCGCCTCCTCCGCGGGTACCA

>2385

TCACATGGGTGGTCCTAGGGTGTCCCATGAGAGATGCAAAGCGCCTGAATTTTCTGAC  
TCTTCCCATCAGACCCCCCAAAGACACACGTGACCCACCACCCCATCTCTGACCATGA  
GGCCACCCTGAGGTGCTGGGCCCT

>2386

TATCTCTTCTCAGGGAAAGCAGGAGCCCTTCAGCAGGGTCAGGGCCCCCTCATCTTCCC

TTCTTTCCAGAGCCGTCTTCCAGTCCACCGTCCCCATCGTGGGCATTGTTGCTGGC  
CTGGCTGTCCTAGCAGTTGTGGT

>2387

AAAATCCCCGCGGGTTGGTCGGGGCGGGGCGGGGCTCGGGGGACGGGGCTGACCGC  
GGGGCCGGGGCCAGGGTCTCACATCATCCAGAGGATGTATGGCTGCGACCTGGGGCCC  
GACGGGCGCCTCCTCCGCGGGCATGA

>2388

AGGGGATGGGGCGGGCGGGGGCGGGGGGCTCGGGACTGCTTGCTCAGCCTCGCTGC  
TTGCCTCCTGCAGACGCCGCCAGGCCGAGCCAGTTCCGGGTGTCGCCGCTGGATCGGA  
CCTGGAACCTGGGCGAGACAGTGA

>2389

GCCAGGGCTAGGGCAAGAACACCTCCATAACCCCAGCCTGGCCCCCAACCACGCTCT  
GTTGCTCTTGCAGCGAAGCCCACCACGACGCCAGCGCCGCGACCACCAACACCGGCG  
CCCACCATCGCGTCGCAGCCCCTGTC

>2390

TCCCGGGACGGTGGGGCGGTTGGGAGGTCCCGGGCCCTCTCCTAAATGTCGGCGTCTT  
TGGTGTCTCAGTGCACACGAGGGGGCTGGACTTCGCCTGTGATATCTACATCTGGGC  
GCCCCTGGCCGGGACTTGTGGGGT

>2391

GGGGGCGCAGGACCTGAGGAGCCGCGCCGGGAGGAGGGTCGGGCGGGTCTCAGCCC  
CTCCTCGCCCCAGGCTCCCACTCCATGAGGTATTTCTACACCGCCATGTCCCGGCCCG  
GCCGCGGGGAGCCCCGCTTCATCGC

>2392

AAAATCCCCGCGGGTTGGTCGGGGCGGGGCGGGGCTCGGGGGACGGGGCTGACCGC  
GGGGCCGGGGCCAGGGTCTCACATCATCCAGAGGATGTATGGCTGCGACCTGGGGCCC  
GACGGGCGCTTCCTCCGCGGGCATAA

>2393

TCACATGGGTGGTCCTAGGGTGTCCCATGAGAGATGCAAAGCGCCTGAATTTTCTGAC  
TCTTCCCATCAGACCCCCCAAAGACACACGTGACCCACCACCCCGTCTCTGACCATGA  
GGCCACCCTGAGGTGCTGGGCCCT

>2394

AGGGAAAGCAGGAGCCCTTCTGGAGCCCTTCAGCAGGGTCAGGGCCCCCTCGTCTTCC  
CCTCCTTTCCAGAGCCATCTTCCCAGTCCACCATCCCCATCGTGGGCATTGTTGCTGG  
CCTGGCTGTCCTAGCAGTTGTGGT

>2395

CACCATAGGAGGGGGCGGAGGTGACGGAGAGGGTCCTCTCTCCGCTGACGCTGCTTT  
GGCTGTCTCCCAGATGTGGTGGTGCTGAACTCCAAGAGGACCATTGAGGAAGCCATGG  
TCAAAAAGTGGGCAGACTTTGCTGG

>2396

GGCCGAAGAAGGTCAGGCCCTCAGCTGCCTTCATCAGTTCCCACCCTCCAGCCCCCAA  
CTCCTCCTGCAGACAAGCTGGTGTCTAAGAACTACCCGGACTTGTCTTTGGGAGACTA  
CTCCCTGCTCTGGAAAGCCCACAA

>2397

GCCTCTCACAGTAGCCCCCGCCCTGCCCGCTGCACAGCGGCCTGCTGGAACCTCACACT

GTTTCTCCACAGCGCATGAGAGCCCAGCCCGGCACCCCTGTGGCCATTGAGGAGGAAT  
TCTCTCTCCTCACCTGCAGCATCA

>2398

GGCCACCCCCAGCCCCCTCCCTGAGCCTCTCCTTGTCTGAACTGAAAGTACTCCCTC  
CTTTTCTGGCAGGACGACAACCTTAATGCCTGCCTATTACAAATGTATCCAGGAGGTGTT  
AAAAACCTGGAGCCACTGGTCCA

>2399

TGTAGGGGAGAGGCTGGGGTGGAGGGAGAGGCTCCTTCCCACAGCTGCATTCTCATGC  
TTCTTGCCGCAGTTCTTCCCCAATCCAGGTCTCCGGAGGCTGAAGCAGGCCATAGAGA  
AGAGGGATCACATCGTGGAGATGC

>2400

TGGGCCTGTTGCCACTCTGTACTCCTCTCCCCAGGCCAGCCGCTCAGCCCGCTCCTTTC  
ACCCTCTGCAGGAGAGCCTCGTGGCAGGCCAGTGGAGGGACATGATGGACTACATGCT  
CCAAGGGGTGGCGCAGCCGAGCA

>2401

GCTGAGGGAGCGGCTGGAGGCTGGGCAGCTGTGGGCTGCTGGGGCAGGACTCCACCC  
GATCATTCCCCAGATTACAGCAGCGACTGCAGGAGGAGCTAGACCACGAACTGGGCCCT  
GGTGCCTCCAGCTCCCGGGTCCCCT

>2402

GTTGGGGATGAGTGAGGAAAGCCCGAGCCCAGGGAGGTCCTGGCCAGCCTCTAACTC  
CAGCCCCCTTACGATCTCTGGCTACGACATCCCTGAGGGCACAGTCATCATTCCGAAC  
CTCCAAGGCGCCACCTGGATGAG

>2403

GAAAATGTGGTGGAGGCTGGTCCCCGCTGCCGCTGAACGCCTCCCCACCCACCTGTCC  
ACCCGCCCCGAGATCGCTTCCTGGAGCCAGGCAAGAACTCCAGAGCTCTGGCCTTCG  
GCTGCGGTGCCCCGCGTGTGCCTGGG

>2404

GCAGGCGCAGGACCCGGGGAGCCGCGCAGGGAGGAGGGTCGGGCGGGTCTCAGCCC  
CTCCTCGCCCCCAGGCTCCCACTCCATGAAGTATTTCTTCACATCCGTGTCCCGGCCTG  
GCCGCGGAGAGCCCCGCTTCATCTC

>2405

AAATCCCCGCCGTTGGTCGGGACTGGGGCGGGGCTCGGGGGACGGGGCTGACCACG  
GGGGCGGGGCCAGGGTCTCACACCCTCCAGTGGATGTGTGGCTGCGACCTGGGGCCC  
GACGGGCGCCTCCTCCGCGGGTATGA

>2406

TCACATGGGCGCTGTTGGAGTGTGCAAGAGAGATACAAAGTGTCTGAATTTTCTGAC  
TCTTCCCGTCAGAACACCCAAAGACACACGTGACCCACCATCCCGTCTCTGACCATGA  
GGCCACCCTGAGGTGCTGGGCCCT

>2407

TGGAGCCCTTCACGCGGGTCAGGGCTGAGGCTTGGAGGTCAGGGCCCCCTCACCTTCC  
CCTCCTTTCCAGAGCCGTCTTCCCAGCCCACCATCCCCATCGTGGGCATCGTTGCTGG  
CCTGGCTGTCCTGGCTGTCCTAGC

>2408

CGAGGGCCAGGACCCGGGAGCCCGCGCAGGGAGGAGGGTCGGGCGGGTCTCAGCCC

CTCCTCTCCCCAGGCTCCCACTCCATGAGGTATTTCTACACCGCTGTGTCCCGGCCCA  
GCCGCGGAGAGCCCCACTTCATCGC

>2409

AAAATCCCCGCGGGTTGGTCGGGGCTGGGGCGGGGCTCGGGGGACGGGCTGACCACG  
GGGGCGGGGCCAGGGTCTCACACCCTCCAGAGGATGTACGGCTGCGACCTGGGGCCC  
GACGGGCGCCTCCTCCGCGGGTATGA

>2410

CACATGGGCGCTGTTGGAGTGTGCAAGAGAGATACAAAGTGTCTGAATTTTCTGACT  
CTTCCCGTGCAGAACACCCAAAGACACACGTGACCCACCATCCCGTCTCTGACCATGA  
GGCCACCCTGAGGTGCTGGGCCCT

>2411

TGGAGCCCTTCACGTGGGTCAGGGCTGAGGCTTGGGGGTCAGGGCCCCTCACCTTCCC  
CTCCTTTCCCAGAGCCATCTTCCCAGCCCACCATCCCCATCGTGGGCATCGTTGCTGGC  
CTGGCTGTCCTGGCTGTCCTAGC

>2412

CGGCGGCTGCGGGGGCGGCCGGGCTGGGGCCGGGCGGGGCCTGACTGACCGGCCG  
GTGATTCCCCGCAGAGGATTTCTGTGTACCAGTTTAAGGGCATGTGCTACTTCACCAACG  
GGACGGAGCGCGTGCGTCTTGTGAC

>2413

CATTCCCAATGGTAGACGTGCTGTGTGGTCTCACATCTCACTCCTGTCTTTTCTGTTTA  
CTGCCCTCAGTGGAGCCCACAGTGACCATCTCCCCATCCAGGACAGAGGCCCTCAACC  
ACCACAACCTGCTGGTCTGCTC

>2414

ACTTCAGCTCCTCAGCAGGGATGCTATGGGGTGTAGGGACAAACGCTGACACTCAGGC  
TCTGCTTCTTAGGGGCTCAGTCTGAATCTGCCCAGAGCAAGATGCTGAGTGGCATTGG  
AGGCTTCGTGCTGGGGCTGATCTT

>2415

GGGGGCGAAGGACTCGGGGAGCCGCGCCGGGAGGAGGGTCGGGCCGATCTCAGCCC  
CTCCTCGCCCCCAGGCTCCCACTCCTTGAAGTATTTCCACACTTCCGTGTCCCGGCCCG  
GCCGCGGGGAGCCCCGCTTCATCTC

>2416

AAAATGCCACAGGGTGGTGGCGACGGGGGCGGGGCTTGGTGGGCGGGACTGACTAA  
GGGGCGGGGCCAGGGTCTCACACCCTGCAGTGGATGCATGGCTGCGAGCTGGGGCCC  
GACAGGCGCTTCCTCCGCGGGTATGA

>2417

TCACATGGGTGCTGCTGGAGTGTCCCATGAGAGATACAAAGTGCCTGAATTTTCTGACT  
CTTCCCCTCAGAGCCCCCAAAGACACACGTGACTCACCACCCCATCTCTGACCATGAG  
GCCACCCTGAGGTGCTGGGCCCT

>2418

TGGAGCCCTTCCGCAGGGTCAGGGCTGAGGCCTGGGGGTCAGGGCCCCTTACGTTCCC  
CTCTTTTCCCAGAGCCGGCTTCCCAGCCCACCATCCCCATCGTGGGCATCATTGCTGGC  
CTGTTTCTCCTTGGATCTGTGGT

>2419

GCGGGGGCGAAGGACTCGGGGAGCCGCGCCGGGAGGAGGGTCGGGCCGATCTCAAC

CCCTCCTCCCCAGTGCTCCCACTCCTTGAAGTATATTCCACTATCCTGTCCCGGCCCGG  
CCGGGGAGCCCCGCTTCATCTCTG

>2420

GCCAAAAATGCCACAGGGTGGTGGCGACGGGGGCGGGATTGTGGGCGGGACTGACTA  
AGGGCGGGGCCAGGGTCTCACACCCTCCAGTGGATGCATGGCTGCGAGCTGGGGCCC  
GACGGCTTCCTCCGCGGGTATGAACA

>2421

TCACATGGGTGCTGCTGGATGTCCCATGAGAGATACAAAATGCCTTAAATTTTCTGACT  
CTTCCCCTCAGAGCCCCCAAAGACACACGTGACTCACCACCCCATCTCTGACCATGAG  
GCCACCCTGAGGTGCTGGGGCCCT

>2422

TGGAGCCCTTCCGCAGGGTCAGGGCTGAGGCCTGGGGGTCAGGGCCCCTTACGTTCCC  
CTCTTTTCCCAGGAGCCGCTTCCCAGCCCACCATCCCCATCGTGGGCATCATTGCTGGC  
CTGGTTCTCCTTGGATCTGTGGT

>2423

GGGCTGTTTACAGAGTGTCTATCACTTACCGTGACCTGACCTGAATTTGTTCATGACTATTT  
TCTTCTGTAGCCTGAGACAGCTGCCTTGTGTGCGACTGAGATGCAGGATTTCTTCACGC  
CTCCCCATATGTGTCTTAGGGG

>2424

TGGGGCGCAGGACCCGGGGAGCCGCGCCGGGAGGAGGGTCGGGCGGGTCTCAGCCC  
CTCCTCGCCCCAGGCTCCCACTCCATGAGGTATTTACAGCACCGCGGTTTCTGGCCGG  
GCCGCGGGGAGCCCAGCTTCATTGC

>2425

TCACATGGGCGCTGCTGGGGTGTCCCATGAGGAATGCAAAGTGCCTGAGTTTTCTGAC  
TCTTCCTTTCAGACCCCCCAAGACACACGTGACCCACCACCCTGTCTCTGAACATGA  
GGCATAACGAGGTGCTGGGTTCTG

>2426

TGGGGCGCAGGACCCGGGGAGCCGCGCCGGGAGGAGGGTCGGGCGGGTCTCAGCCC  
CTCCTCGCCCCAGGCTCCCACTCCATGAGGTATTTACAGCACCGCCGTTTCTGGCCGG  
GCCGCGGGGAGCCCAGCTTCATTGC

>2427

AAATCTCCGCAGGTTGCTAGGGGCGGGGCCAGGGCTCGGTGGGCGGGGCTGACCGCG  
GGAAGTGGGCCAGGGTATCACATCCTCCAGGGAATGTTTGGCTGCGACCTGGGGCCCCG  
ACGGGCGTCTCCTCCGCGGGTATGA

>2428

TCACATGGGCGCTGCTGGGGTGTCCCATGAGGAATGCAAAGTGCCTGAGTTTTCCGAC  
TCTTCCTTTCAGACCCCCCAAGACACACGTGACCCACCCCTCTCTGAACATGAG  
GCATAACGAGGTCCTGGGTTCTGG

>2429

CTGGAGACCTTTAGCAGGGTCGGGGCTGGGTCCTGGAGGTCAGAACCCTCACATTCCC  
CTCCTTTCCCAGAGCCCTCTCCCCAGCCCACCATCCCCATTGTGGGTATCATTGCTGGC  
CTGGTTCTCCTTGGAGCTGTGGT

>2430

CGGGCCCGAAGTGGACGTTTCGGGGCCCCGACGAGGTCGCTGGGGCGGGCTGACCGCGC

CCTTTCCTCGCAGTACATCGCGGTGCACGTGGTCCCGGACCAGCTCATGGCCTTCGGC  
GGCTCCAGCGAGCCGTGCGCGCTCT

>2431

GGAGGGGCGGCGGCGCGGGCCAGGCCCGGGACTGAGCCACCCGCTGAGTCCGGCC  
TCCTCCCCCGCAGGGTCTACATCAACTATTACGACATGAACGCGGCCAATGTGGGCTG  
GAACAACCTCCACCTTCGCCTAAGAG

>2432

ACAGATCCCAAAGATTCCCGGGGGGTGTGGCCTTCAATGGCTCAGGCGTCCCCTGCTG  
TCCCGGCTGCAGTGACCTGGGAGCCAACACCCTCGCTGAGGTTCCAGGAGCCCCCGC  
CTGGAGGAGCTGGCCCCCAGAGCT

>2433

GAGGAAGGGGACCGGTAGAGCGGGGCTGGGTAAGCCTCCATCCAGCCGGGCTGAGCC  
CTGGTCTCCGCAGAGCCTCTGCCCCCTCCCGAGACACCCGCTACCTGGTGTTAGCGGTG  
GACCGCCCTGCGGGGGCCTGGCGCG

>2434

GGACGGGGAGCCGGGTGCGACTGCCCCCGGGCCCCAGCCCCTGAGCCAGCCGCGTGC  
CCACCCACCGCAGACTCCCGGCTGAGTACCGCCCGGCTGCAGGCACTGCTGTTGCGCG  
ACGACCACCGCTGCTTCACACGGAT

>2435

ACGGGGCAGGAGCGGGCGGGGGCGGCGTGGCCTCGTGGCCGCTCTCAACTCCTCCAA  
TTGCGGGTTCCAGGCCATCCGCGGAAGTTCGAGGAGTCGCCACCCAGCGCAGACCCCT  
TCCTGGAGACGCTCACGCGCCTGGTG

>2436

GAGGGCCCTGCACGCGGCCCCGGTGGGGAAGGGGACGGGCCAGGGATTGAGACTCG  
GGCTCTCCCCTCAGGATGCAGCACCGAGGCTTCCTCCTCCTCACCCCTCCTCGCCCTGCT  
GGCGCTCACCTCCGCGGTGCGCAAA

>2437

CCCAGGAAGGCGGGTCCCGAGGGAGTCTCCCCGTGCCCCAGTCCTGAACTCTGTTCT  
CGCGCGTTGTAGATAAGGTGAAGAAGGGCGGCCCCGGGGAGCGAGTGCCTGAGTGGG  
CCTGGGGGGCCCTGCACCCCCAGCAG

>2438

GCCTGGGGGGACCCCTTGGCGGAGGGCGGGGCCGCGGGCGCGCAGCCTGACCTGGGC  
CGCTCTCTCGCCAGCCGACTGCAAGTACAAGTTTGAGAACTGGGGTGCCTGTGATGGG  
GGCACAGGCACCAAAGTCCGCCAAGG

>2439

GTGGAGCCGGCGGTCTGCAATGGGTCAGCCTAACTGCTGATATGGTATTAATATTCTTCT  
TGTTTTACAGCCAAGAAAGGGAAGGGAAGGACTAGACGCCAAGCCTGGATGCCAAG  
GAGCCCCTGGTGTACATGGGGC

>2440

GAGGGCCCTGCACGCGGCCCCGGTGGGAAAGGGGACGGGCCAGGGATTGAGACTCG  
GGCTCTCCCCTCAGGATGCAGCACCGAGGCTTCCTCCTCCTCACCCCTCCTCGCCCTACT  
GGCGCTCACCTCCGCGGTGCGCAAA

>2441

ACCCAGGAAGGCGGCTCCCGAGGGAGTCTCCCCGTGCCCCAGTCCTGAACTCTGTTCC

TCGCGCGTGTAGATAAGGTGAAGAAGGGCGGCCCGGGGAGCGAGTGCCTGAGTGGG  
CCTGGGGGCCCTGCACCCCCAGCAG

>2442

CCTGGGCGGACCCTTGGCGGAGGGCGGGGCCGCGGGCGCGCAGCGCTGACCTGGGCC  
GCTCTCTCGCCAGCCGACTGCAAGTACAAGTTTGAGAACTGGGGTGCGTGTGATGGGG  
GCACAGGCACCAAAGTCCGCCAAGG

>2443

GGAGCCGGCGGTCTGCAATGGGTCAGCCTAACTGCTGATATGGTATTAATATTTCTTTCT  
TGTTTTACAGCCAAGAAAGGGAAGGGAAAGGACTAGACGCCAAGCCTGGATGCCAAG  
GAGCCCCCTGGTGTACATGGGGC

>2444

CATTTACTGTGCTCCAGTCCCCACCTCTGGCCACACCCAGCTCTCACAGCCTTCTCTC  
CCCACCCGCAGAAGGAGAATAAGAATGAAAAGGTCATAGAACACATCATGGAGGACC  
TGGACACAAATGCAGACAAGCAGC

>2445

TCATAGATGCTATGCCTCGGCTCTCTCTGAGATCTTTAAACTCTGGCTTCTTCCTCCTCA  
ATCTTGACAGAAAAAGGGTGCAGACGTCTGGTTCAAAGAGTTGGATATCAAACTGAT  
GGTGCAGTTAACTTCCAGGAGT

>2446

CCTAGAAGATGAATTTATGTAATATGATTTGCAAAATGAGTATTCATTTGTGATTTTTTTT  
TTTTTTAAGGTGAAAGTACATTTTTTTGTTGAATTAAGTGAACTGCCAGCATACTCATG  
CATGCAACAGCACATTCTCT

>2447

TTTTTGTTTTAATTCCTTTTTTGTTTTAATTCCTTTGAGTTACTTCCTTATGCATATTTTAC  
TTTAACAGGAAGAGGTACTGCAACATTTGATGGGACGGCAATAGCAAATGCAGTTGTT  
AAAGAACTTGCTGAGACTAT

>2448

ACAAATTCGGTTTTTTTGAGAGGGCACTTCTGTTGCTAGCACATGTATCGCTAATATTTTT  
CTTCTTAAGGCATGCATGGTAGAAAATGAATGTGAAGACCCAGCCAGGAGACTATT  
ACGTTCTCTATAAATTCATTA

>2449

AGTAAAAGGGGAAGGGATGATGCACTATGAAAAACAAAAAACTTTTTTTTTTTTTT  
TTTAATTTTAAGGGAAGTTTGCCTGGCTAGTGAAAGGTCAACTGTAGATGCTGAAGCT  
GTCCATAAATTGCTGACTTTGATT

>2450

GGCCTCTGTTGGGGCAGGGAGTTCTATGATCGAGTCTGCTCTGACCTCTCAATCTCCTT  
TCCTCCCCAAGGCTGCTGCTCCTGCTGCCCTGTGGGCTGTGCCAAGTGTGCCCAAGGC  
TGCATCTGCAAAGGGGCATCGGA

>2451

CTGCGCCAGGTTTCCGCACCAAGACCCCTTTAACTCAAGACTGCCTCCCGCTTTGTGT  
GCCCCGCTCCAGCAGCCTCCCGCGACGATGCCCTCAACGTTAGCTTCACCAACAGGA  
ACTATGACCTCGACTACGACTCGG

>2452

GCCTGAGCGTGCGGGGTTCTTGCTAAGGTCTCCGAGTCGGGTTCTGATCCACTGTGCT

CTTTTCCGACAGGATCAGCAACGCTACCACGAAGACATTTTCGGGCTCACGCTGCGCA  
CCCAGGAGGTGACAAGCCGCATAC

>2453

CCAGCCAGGAGAACGGGCTTTCCCTCTCCTTCCGCCTGCGGAGGGGAAGCTGAAGTC  
TGGTCTTCCTCAGGTCTGGTCTTCTCTCGTCTGAGCCCTGAGTACTACGACCTGGCAAG  
AGCCACCTGCGTGATGAGGAGAA

>2454

CTTTCCTGGGCACTTTACGCGCTCCCAGAGTGTCTGAGAGACCATCATAAGGGCTTTC  
TTTCCTGACAGGGTGACCTGTTGACCAAAACACAGGAGCTGGGCCGTGACTACAGGA  
CCTGTCTGACGATAGTCCAAAAAC

>2455

ACCTGCAGGGTTGGCAGAGCTGGGCAGGACTCACCTATAACCATGTCCACTGTGGTG  
CTGCTGCTGCAGAGAAAGTGTTCCAATGCTGCGACCCGGGTGTGTAGGACGGGGAGG  
TCACGATGGCGCGACGTCTGCAGAA

>2456

ATTCTGAGTGCCTGCTTCTCCTTGAGGACCCACCACATCTGCCCACAGCTAGCTGTTCT  
CTCCGCTCCAGGTCCCCTCTGAGCCCTCTCACCTTGTCTGTGGAAGAAGCACAGGCT  
CCTGTCCTCAGATCCCGGGAACG

>2457

CTTCCCCGAGATTCTTTTTCTTACCCACTGCTAACTCCATACTCAATTTCTCATGCTCTCC  
CTGTCCCAGGCTCAAGGAAAAACATGGCCTGCTATTGCAGAATACCAGCGTGCATTGC  
AGGAGAACGTCGCTATGGAAC

>2458

CCCAGTAGAGCTATAAATCCAGGCTGGCTCCTCCCTCCCCACACAGCTGCTCCTGCTCT  
CCCTCCTCCAGGTGACCCCAGCCATGAGGACCCCTCGCCATCCTTGCTGCCATTCTCCTG  
GTGGCCCTGCAGGCCAGGCTG

>2459

CTTCCCCGAGATTCTTTTTCTTACCCACTGCTAACTCCATACTCAATTTCTCATGCTCTCC  
CTGTCCCAGGCTCAAGGAAAAACATGGACTGCTATTGCAGAATACCAGCGTGCATTGC  
AGGAGAACGTCGCTATGGAAC

>2460

CTAATGGCAAAATATGAATGGCCTGAAATGTCGAGGTGGAGGTGTAATGATCTATTTGT  
GTCCATTTTAGGCAGGTAAAAATCAAGGTGACCCCAAGAAAATGGCTCCTCCTCCAAA  
GGAGGTAGAAGAAGATAGTGAAG

>2461

TCATTGGGACCATGGTTATCTTTTTGGGTGTGGGGCTGGACTTACTGGTTTGGTTTTTCAT  
TTATCTCAAGGTCGTCATACCTCAGAAGAAAGGCAAGAAGGCTGCTGCAACCTCAGCA  
AAGAAGGTGGTCGTTTCCCAA

>2462

TTACATTAGATTTGAAAACCGATGTTGGTTTTGGGAGATTGCTGCAATTTTtaggtgact  
TCTCTTTCAGACTCTGAAGAAGAAGCTATGGAGACTACACCAGCCAAAGGAAAGAAA  
GCTGCAAAAGTTGTTCTGTGAA

>2463

TATGTTTAAAGGAGGCACTTAAGTGTTTGTGGCTACTGATGTGTGATACATTGTTTGACA



TCTTGTCCAGAGCCTGTCAAAGAAGCACCTGGAAAACGAAAGAAGGAAATGGCCAAA  
CAGAAAGCAGCTCCTGAAGCCAA

>2464

AGAAATTTTGCTTTGGAACTAACTTTTTACCACACTACAAGTAGACTGAGTTGAGCTT  
TTTTTGTGCAGGCACAGAACCGACTACGGCTTTCATCTCTTTGTTGGAAACCTAACT  
TTAACAAATCTGCTCCTGAATT

>2465

TCTAGATACAGATTGTGATTTTGATTTGTGTTTTACCTGTTGTAATTTTGCCCTCCTCTC  
CACCTGAAGGAAATTTGGTTATGTGGATTTTGAATCTGCTGAAGACCTGGAGAAAGCG  
TTGGAACCTCACTGGTTTGAAA

>2466

CTCTTTTTGTTGTTGCCCCCACCTTTGGTTTTTCAGGCCACAGAGCTCATTTTTGTTTT  
TTAATCTAGAGCGAGATGCGAGAACACTTTTGGCTAAAAATCTCCCTTACAAAGTCAC  
TCAGGATGAATTGAAAGAAGT

>2467

TGTTGCTGAGGTAAAAGCATTTGTGTTAATATGGTTTTAAAAACCATGAGTTCTTCTCCC  
TCCATTGCAGGATTGCTTATATTGAATTTAAGACAGAAGCTGATGCAGAGAAAACCTTT  
GAAGAAAAGCAGGGAACAGAG

>2468

AGATATTACTGTTGTGACCGAAGCTGGGACACTGTTTCAGAGTCTTAGGAATGTGGCTC  
TCTATTTTCGAGGTGAATCAAAAACCTCTGGTTTTAAGCAACCTCTCCTACAGTGCAACAG  
AAGAACTCTTCAGGAAGTATT

>2469

ATCATGTGACCAGTGGTATAGAGAGCATGTGCCTGGTAAATTACTCTAAGCATTAACTG  
TTCATCCTCAGGTATGCATTTATAGAGTTTGCTTCATTCTGAAGACGCTAAAGAAGCTTTA  
AATTCCTGTAATAAAAGGGAA

>2470

TAGGCATTGTGCAAATTCAGTGTACGAACTGTGAATTCACATAAATCGCAAATTTTTTTT  
TCCTTCCCAGAGCCATCCAAAACCTCTGTTTGTCAAAGGCCTGTCTGAGGATACCACTG  
AAGAGACATTAAAGGAGTCATT

>2471

CATGTACAGTTAACTTGGGACATGTGTAGTAGGTGCTTTTTATAATGGGCAATTTCAATT  
GGTGTCTTAGGTTTGGTTTTGTAGACTTCAACAGTGAGGAGGATGCCAAGGAGGCCAT  
GGAAGACGGTGAAATTGATGGA

>2472

GGTTCCTAATCACTGGGGAGGAGGAGCTTTGTACCCATTCTTTTAACAGTGTCTTGCCT  
TCCTCCTGTAGGGCGAGGAGGCTTCCGAGGAGGCAGAGGAGGAGGAGGTGACCACA  
AGCCACAAGGAAAGAAGACGAAGTT

>2473

CAGCCAGTGCCCCATCTTCAACTCGATGTGTTCCCTAAGGTAGACAGCAAATTCCTATT  
TTATTTCTCAGATTGTCACTGCTGTTCCAAGGGCACACGCAGAGGGATTTGGAATTCCT  
GGAGAGTTGCCTTTGTGAGAAG

>2474

TTTTTATTTTGATTGTGGCTATAAGTGAACATCTATCATGAGACATTTGCTGCACTTTTCCT

TGCTTG TAGGTTGGTTTTGCGGATTGCCACTGATGATTCCAAAGCAGTCTGTCGTCTCA  
GTGTGAAATTCGGTGCCACG

>2475

GGAAGTAAATACTCTCATGCCCAGTTAGGAGTGAGTCAGGGTTTTTAATATGCCACTTT  
TTCTTTCTCAGGCAACTCATGCAGCAATTCCAGAACCCTGACTTCCCACCCGAAGTAG  
AGGAACAGGATGCCAGCACCTG

>2476

GATTTTTTTGGGTTGATGACATATAGAAAGGCAAAGAAAGTGATTGCATGTTTTTGAAA  
ATCATTTTCAGGACTTTCCTTATCCCAGTTGATTGTGCAGAATACTGCCTGTCGCTTG  
TCTTCTATTACCATGGCTTC

>2477

AAAATTATAGTACAGTTTATTAGAACAGGAGAATCCTGGTTTTCTGAATTATAAATATAA  
TCAATTCTAGATATCCAGGTGAAAGAACTGGAGAAGCGTGCCTCAGGCCAGGCTTTTG  
AGCTGATTCTCAGCCCTCGGTC

>2478

CAGGCGTGAGCCACCACCCAGCCTGAATACATTTTAGAGTGCCTAGCCTATTAAACT  
TTTTTTTCCAGTCCCATGAAGCTGAGGTCTTGAAGCAGCTGGCTGAGAAACGAGAGCA  
CGAGAAAGAAGTGCTTCAGAAGG

>2479

TCGTGACTTGACAGGGCTTTTTTTTTTTTTTTTTTTTTTTGACTGATGACACCTTACCCT  
TCCTTTACAGGATAAGCACATTGAAGAAGTGCGGAAGAACAAGAATCCAAAGACCC  
TGCTGACGAGACTGAAGCTGACT

>2480

AATGGTTGTTTTTTCCATTATCCCTACATTTCTTTTTTTAATAATGATAAACATGCAACT  
TTTTTGTAGCTTTACAACAAATACCCAGATGCTGTGGCCACATGGCTAAACCCTGACCC  
ATCTCAGAAGCAGAATCTCC

>2481

TAATGTGCTATAAAGGCTAAGGGAAAATAAAAACCCATATATTAATTTCCCGGCCATCT  
TAATTTTCAGACCCTTCCAAGTAAGTCCAACGAAAGCCATGACCACATGGATGATATGG  
ATGATGAAGATGATGATGACC

>2482

TGGAAGGATTACCATATTCCCATCCCTAGCCGTTTCATATAATTATTCTTCATTTGTGCC  
GTGATTCAGTACCCTGATGCTACAGACGAGGACATCACCTCACACATGGAAAGCGAGG  
AGTTGAATGGTGCATACAAGG

>2483

GCCTCGCAGGGTCCTCCGAGCGAGTCCCCAGCGCCGCCCGCGTCCCGCTCACCCCGC  
CCGTCCCCCGAGTGCCTCCCCTGCGGGCCCCGGGGGCAAAGGCCGCTGCTTCGGGCCC  
AATATCTGCTGCGCGGAAGAGCTGG

>2484

GCGCTCCGGGGCCAGGGGGAGGCGGGCGGGGGTGCGGCCGGGATTCCCCTGACTCCA  
CCTCTTCTCCAGACGGCTGCCACGCCGACCCTGCCTGCGACGCGGAAGCCACCTTCT  
CCCAGCGCTGAAACTTGATGGCTCC

>2485

GAAGTGGGTGGATTTGGAAACCTTTTGGGATACTGGATAGCTTGTTCCATAGGTTGTGT

ACTATTTACAGGTATGCTGTCACACCAGTTGAAGCAGCATGTCATCGATGGAGAAAAA  
ACCATTATCCAGAATCCCACAGA

>2486

CAGCCTGGGTGACAGAATGAGACTTTGTGTCAAAAAAAAAAAAAAAAAATTCCTTTCTCTC  
TATTCCTTTTAGGAAGGACCATGAAAAAGCTGAATTTGAGGTACATGAAGTATATGCTG  
TGGATGTTCTCGTCAGCTCAGGA

>2487

ACCAGAGTTGGCAAAGAGGGGTGACTGAGAGTGTTACCAGACCAAATGTTACTTAA  
ATTACTCTCTCAGGCCAAGGATGCAGGACAGAGAACCCTATTTACAAACGAGACCCC  
TCTAAACAGTATGGACTGAAAATGA

>2488

AAATATGAGCAAAATGGTAAGACTTGATGGGGAGTTAAAGATACCTCTGAATATCATCT  
TCCCCTGCCAGAGCATTGTAAGATGAGAAGAAGGCTCGGATGGGTGTGGTGGAGTGC  
GCCAAACATGAACTGCTGCAACCA

>2489

CTGTAAGTTCAGAAGAGCTAAGTATGACAAAGGAACTTTTTATCAAAACACATCTTCAT  
TTTTGCCATAGGTGAATTTGTTGCCAGTTTAAATTTACAGTTCTGCTCATGCCCAATGG  
CCCCATGCGGATAACCACTGG

>2490

CTCTGGTCCCAGACATCCCCAAGTAGTTAGAACTGACAGGTCTTCTCCCTCTCCTTTT  
CTTGCAATATAGGCCTCCAAGACTGCAGAGAATGCCACCAGTGGGGAAACATTAGAAGA  
AAATGAAGCTGGGGACTGAGGTG

>2491

ACCAGAGGTGTAAGGGCAAGAGTGGGGTGGATGGGTGTGAGATTCCTACAGCCTTGC  
CTGCTCTCTAAAGGCAACTCTAGACATCGCGTCCAACAACCGTAAGGGTATCGCCTTC  
GCTGACTCTGGCGCACACTGGCAGC

>2492

GAGGCAACTGGTACAGAGAGGGGGTAAGGGTGCTGATTCATTTCCACCCTCATGCCCC  
CTCTCCCTTCAGTTTGTGAGGAAATCAGTACATTGTGTGATATGCTGGCCACCCACAAC  
GGACAGTCCATAGACATCTCCTT

>2493

AGGAGAGACTCTGGCAGCTGGAGAAGCAAAATGGAAGAAGGGTGGATTTAACATTTT  
TTTTTATTTCCAGATTTTCCCCAACAAAACCTGGAAAAATTAAAGAGCCATGTTAAAA  
TACGAAATGATCTGCTGAATAAAA

>2494

GAAGTATGGCAGGAGTGTCACAGATGGGGCTCCTTCCTTATTAATGTCTCCCAAACCTC  
ACCCAACCCAGGAGAAATTCCGGAGTGACTCTATCACCACATGCTGGACACACTGAT  
GCAAGCCAAGATGAACTCAGATA

>2495

TTATTCTCTAAGCCCTTGCCCTCTCCTGGGGCTTACACACACTAGTCACCTCCAACCTACTC  
TGGTCTTCAGGTGAAGAAGAAGCTCTACGAGGAGATTGACCAGAATGTGGGTTTCAGC  
CGCACACCAACTATCAGTGACC

>2496

GGGCATGAGGCTGAGCAAGGAAGGGAGTACGAAGTCCCAGACCCACTTTTCCTCTTC

CACTCTGGAGCAGCATCGGTGAGTTTGTCTGTGGACAAGGGCACAGAAGTTATCATCAA  
TCTGTGGGCGCTGCATCACAATGAG

>2497

AACCAGGGCAGAACCATGCCTCTCCTCCCTCCTGCCCTAACCCCTGGCTGATGCCACT  
CCTTGCCAGCAGAGCGTTTCTTGAATCCAGCGGGGACCCAGCTCATCTCACCGTCAGT  
AAGCTATTTGCCCTTCGGAGCAGG

>2498

TACCACAAAGAATAAATCCTTTCACTCTGATCAATTTTGTTAACTTCTCACGTGTCTTCT  
CTACACCCAGGGCACCGGTGAATCCAAGTGTCTCTGATGGTCAAAGTTCTAGATGCT  
GTCCAGGCAGTCCTGCCATCA

>2499

TACCACAAAGAATAAATCCTTTCACTCTGATCAATTTTGTTAACTTCTCACGTGTCTTCT  
CTACACCCAGGGCACCGGTGAATCCAAGTGTCTCTGATGGTCAAAGTTCTAGATGCT  
GTCCGAGGCAGTCCTGCCATCA

>2500

GGGTGTATTACTTTGCCATGCCATTTGTTTCCTCCATGCGTAACTTAATCCAGACTTTCA  
CACCTTATAGGAAAACCAAGTGAGTCTGGAGAGCTGCATGGGCTCACAACCTGAGGAGG  
AATTTGTAGAAGGGATATACAAA

>2501

CAGTCATGTGTGTCATCTGTCACGTTTTTCGGGCTCTGGTGGAAATGGATCTGTCTGTC  
TTCTCTCATAGGTGGTATTCACAGCCAACGACTCCGGCCCCCGCCGTACACCATTGCC  
GCCCTGCTGAGCCCCTACTCCT

>2502

ACTAGAGAAGGAAAATGACATGAGGCAGTGGGGTATCTGTGTGTTCTCCCACTGACCA  
CGCTTTCTTTAGTGACTCCTGATTGCCTCCTCAAGTCGCAGACACTATGCTGCCTCCCA  
TGGCCCTGCCCAGTGTATCTTGG

>2503

TTCCCCAAGGTCATCTCCCACCCCAAGCCCCACTCTTCATTTTACCCTCCCCCTCTTTCT  
TCCACCTCAGGTGAAGAACCCAGAGGGAACTGCCCTCTGCACGGATCCGCTGTCCC  
AAAGGCTCCAAGGCCTATGGCTC

>2504

CACCTACCTTTGCCCTGCCCTCCCTCAGCAGGTCTCAGGCTCCCTCTCATTCTCTTTGTT  
GCCCTCAAAGCTGGCCTGCCAGAAGCGGCCCTCTGGAAACCTGGTGTCTGTGCTCAGT  
GGGGCTGAGGGATCCTTCGTGT

>2505

AGCTAAGGGGCCATGCAAGAAGAGCTGCAATGGCCATTCCCTTCACCTGGCTACCTCC  
TCTACTCTACAGGGCACCGAGCCCAATGGAGAAGGTTGGGAGTGGAGTAGCAGTGAT  
GTGATGAATTACTTTGCATGGGAGA

>2506

CTGGGATGCCCCCTTCATTGGATTACAAGCTTCCTCAGCCCCATTCCATTTATGTCTTCT  
GTCTCTCCAGCATTTCTGAGGTGGAAAGATTATAACTGTAATGTGAGGTTACCCTATGTC  
TGCAAGTTCACTGACTAGTG

>2507

GGTTGGAGCCCCCTCTGTTTTGACCTATAAAGAGAAATGCCCTTGGGCCTCTGTTTTTTT

CCCTCTTCTAGGCTGGCAAAGCACACAGGCTGAGCGCTGAGGAGAGGGACCAGCTGC  
TGCCAAACCTGAGGGCTGTGGGGT

>2508

CCTTGAATTGGTGATGTCCAGAAGTCCTTTCTCTTAGAACACTAACCTGGCTCTCACTC  
CACTTAAATAGGCCTTTGGGTTTCATGACAAGAGTGGCCCTGCAGGCTGAGAACTGGA  
CCACCATCCTGAATGGTTTAACG

>2509

CCAGCAGCTAGTGACTCCCTCCTGTTCTTAAGTGAAGTCAGTGGAAGCAGAATTTCTG  
GTTTCATTTACAGGTCCACATCACGCTGAGCACCCATGAGTGTGCCGGCCTTTCAGAAC  
GGGACATAAACCTGGCCAGCTTCA

>2510

GGACATCTCTGGAAAGTCAGCACCTGGACCAGCTCCACCCCTCTCTGAGGACACCTTC  
TTTCCCTTTCAGAACAAAGAACAGCCACCATGCAGCTCTTCCTCCTCTTGTGCCTGGTG  
CTTCTCAGCCCTCAGGGGGCCTC

>2511

TTATTTGCAGCTGAGAATTTCTAATTCTGACACAAAATTCTTTTTTCATTTTTCCCTTTTTT  
CATCTTTAGCTAAGTGGGAGACAAGCTTCAACCACAAAGGCACCCAAGAGCAAGACT  
TCTACGTGACCTCGGAGACTGT

>2512

AATCCAAGGGGTGAGGCTCAGTGTGCCAATGCCCCAGAACAGTCTAAGAAAGCTCCTT  
TTCCCTTTCCAGGCAGCTCGAGCTTTACCTTCCCAAATTCTCCATTGAGGGCTCCTATC  
AGCTGGAGAAAGTCCTCCCCAGT

>2513

GCTTTGCCATTTGCTATGATGACTTCACCTGCCCCTGGTGGCCTGGTGATGCCTGGTGT  
CTCCCCTGCAGATGGTGCACAAAGCTGTGGTGGAGGTGGACGAGTCGGGAACCAGAG  
CAGCGGCAGCCACGGGGACAATCT

>2514

TAACCGGTTTCGAAATACAGCCCTTCAGCAGACGGCGTTGATTTTAAAGCATGTGTCTC  
CTGTCTTCTAGTATGTCCAAAATACTAAAATGCGCCGGCAATGAAGATATCATTACACTA  
AGGGCCGAAGATAACGCGGAT

>2515

TTAAGAAAGTGAGGGTGCCAAATCATTAATTTCTAACAATTAACCTTTTGGAAAATTTT  
GTTCTTAATAGGAACAGGAGTACAGCTGTGTAGTAAAGATGCCTTCTGGTGAATTTGCA  
CGTATATGCCGAGATCTCAGCC

>2516

TAAATATATAATGAGCTAATAGATTGCAACTTTCTTGATGTTTTTCAATGATGAATCTTTT  
GTTTTGTAGGTTACCATAGAGATGAATGAACCAGTTCAACTAACTTTTGCAGTGGGTA  
CCTGAACTTCTTTACAAAAG

>2517

GAACCTTGTTTTGATGGTAGTCATATGTGATACATACTCCTCAGTAATTAACCATCTTCCT  
GTCTTTTCAGTTGTAGAGTATAAAATTGCGGATATGGGACACTTAAAATACTACTTGGCTC  
CCAAGATCGAGGATGAAGA

>2518

GTTTCTGGGACGGAGAGGTCCAGGGACACCCTCGGGCCTAACCCTGACCCTGAGGT

CACCCACCTACAGGAAAAACCAGTGTGAGACCCGAACCATGCTGCTGCAGCCCCGCGG  
GGTCCCTCGGCTCCTACAGCTACCGG

>2519

ACCCCTTCCCTGAAGCAGAGGTGAGGTTTGGGGGGCTGGTCCCCGACAGGGTTGTCT  
CTTGGGTTCCTCAGACTGGGGCAGCACCTACTCCGTGTCAGTGGTGGAGACCGACTACG  
ACCAGTACGCGCTGCTGTACAGCCA

>2520

CCCAAGACCCAGGGCAGGGCACACAGCATCCCCCTCCGCTGAGGCCAGCTCCGTCTC  
CACCTGTCCCAGGCCGAACCCAGACCCCCAGGGCTGAGTTAAAGGAGAAATTCACC  
GCCTTCTGCAAGGCCAGGGCTTCAC

>2521

TTCCTTCATAAAGACCCAACCCTATGACTTTAACTTCTTACAGCTACCACAGCCCCCTAA  
ACCCGCAACAGTTGTTACAGGTTCTGGTCATGCAAGCTCTACCCCAGGTGGAGAAAAG  
GAGACTTCGGCTACCCAGAGAAG

>2522

TAAGGTTGGGGGAAGAGTGCTGAGCCAGAGCTGGGACCCGTGGCTGAAGTGCCCAT  
TCCCTGTGACCAGGCCAGGATCTGTGGTGGTACAATTGACTCTGGCCTTCCGAGAAGG  
TACCATCAATGTCCACGACGTGGAG

>2523

TTCCTTAGTGCTGGCAGCGGGAGGGGCGCCTCCTCTGGGAGACTGCCCTGACCACTGC  
TTTTCTTTTAGTGAGTGATGTGCCATTTCTTTCTCTGCCCAGTCTGGGGCTGGGGTG  
CCAGGCTGGGGCATCGCGCTGCT

>2524

TCCCTGGCCCTGATCAGAGCCCCCGGTAGAAAGGCACTCCATGGCCTGCCATAACCTC  
CTATCTCCCCAGGCTGTCTGTCAGTGCCGCCGAAAGAACTACGGGCAGCTGGACATCT  
TTCCAGCCCGGGATACCTACCATC

>2525

GGGGTGGCATCCAGGGGCTCTAGGAGGTACCTTTTGCTCCTCACCCCTGGATCTCTTTTC  
CTTCCACCCAGGTTTCTGCAGGTAATGGTGGCAGCAGCCTCTCTTACACAAACCCAGC  
AGTGGCAGCCACTTCTGCCAACT

>2526

GGCAGCCGCAGCCTCCCGCCGTGTAGGGTCGAGGCTTGGAATGACCCACGTCCCAATG  
TCGCCTTCCCAGATGGTGTTCGTGCGCAGGCCGTGGCCCGCCTTGACCACAGTGCTTC  
TGGCCCTGCTCGTCTGCCTAGGGG

>2527

CACCCTGCGGCCCCGCTCCACCTGGGGGCGTGGCCAGATCTGACCACGCTCTTCCCTT  
CCCCGCGCCCAGGTATGGGAAAAGAGACGGCCCGGACACGCTTCTTTCCAAAACGTT  
CTTCCCCGACGGCGAGGACCGCCCC

>2528

GCAACATCATTTAACGACGTCTCCCAGGCTCGCCTCCCAAGATCCAATTCCTTCCACTT  
CGTTCCGCAGGTCGGAGGGCCCAGACCTGTGGTGAGGACCCCTGAGGCCTCCTGGG  
AGATCTGCCAACCACGCCCACGTC

>2529

TATCTCTGGCTACTCAGGAGTCACAACTCCCACCCCTCCTCCTCTCTTACTCCCTCCCTT

TCCCCCTCAGCTGAAGCTGAAGAAGATGGGGACCTGCAGTGCCTGTGTGTGAAGACC  
ACCTCCCAGGTCCGTCCCAGGCA

>2530

CCCTCCCCCTTCTAATGCCATTTGCAAACCCAAGGACTGAAAGTCACGTCTCTTCTCTT  
TTCCCTGCCAGAGCCACGCTGAAGAATGGGAGGAAAATTTGCTTGGATCTGCAAGCCC  
TGCTGTACAAGAAAATCATTAAAG

>2531

GCTGCAGAGTGGGGAGTCGGGTGGGGGCCCACTGGCTTGGGAGGGAAAGCAGCGTG  
CCTGTGTCCCCCAGGAGCGTCGGTACGCAGGCCTGAAGCCCGGGAACTCCCCACCT  
GCGAGAGCCTCAAGGACACCATTGCCC

>2532

TCACATAGTGTCTGCTGTGTAAACAGGCTGGGGACAGAGGGGCTAAGGACACCTATTC  
CTTCCGGCATAGGGATGTCAGACCAGGCGATCATGGAGCTGAACCTGCCCACGGGGAT  
CCCCATTGTGTATGAGCTGAACAA

>2533

GCCACGGTACTGAAGGAGATGGTTCGCTGCCCCGTGGTGCTTGGCTGAAAGGAAGCCT  
GTGATTTTTGCAGCTGGTTGGCTCTCACTGACCCCAGGGATGTGGCCAGGATCGAAAG  
CAAGACGGTTATCGTCACCCAAGAG

>2534

GAAAAAAATGCTGGTCGTGTTCTGAAGTCCAAGGTCATTTCTCACCAGTGCCACCCAT  
CGCACCTGTAGGTCGCACCATGTACGTCATCCCATTCAGCATGGGGCCGCTGGGCTCA  
CCTCTGTCTGAAGATCGGCATCGA

>2535

CCAGTGAGTGCCTCGGGGACCCCCAACCAGGGCCCTGGCGCACTGACTTGGGAGGGG  
TCCTTGTTACAGAGCCTTTGGTCAACAACCTGGCCCTGCAACCCGGAGCTGACGCTCA  
TCGCCCACCTGCCTGACCGCAGAGA

>2536

CTCTGGGCTGAAGTACCAACCTCGGGGAGAAGGAAACAAAGATCACAATAAAGAATC  
TTGTCCCCAACAGATTCTGGGTATAACCAACCCTGAGGGTGAGAAGAAGTACCTGGCG  
GCCGCATTTCCCAGCGCCTGCGGGA

>2537

CAATATATAAGAGTATATGTTCTGCTTTGCCTGGCACTCACTACTGCTTCTCTGGTTTAA  
AACTCTCCAGGTCATTTAAGGGCCATCAACCCAGAAAATGGCTTTTTTCGGTGTCGCTCC  
TGGGACTTCAGTGAAGACCAA

>2538

CTGTGTGTGCCGGGCTGCAGGGACTGCCTGTTTTGAGCCAGGCACTCACGAGCCTTTC  
TCTGTCTTATAGGGGAACCTTGTGCCCACCCCAACTCGAGGTTCTGCACCCCTGCCAG  
CCAGTGCCCCATCATTGATGCTGC

>2539

ACACCACTGGTTGTGGAGTCTGAATTTCAAAGCCTCTGATGAACATTTCTCTTTTTTTTT  
CCTGCTAAAGGTGTCCCTCTAGTCTATGAAGCTCTCAGCTGGCAACATGGAGTCTTTGT  
GGGGGCGGCCATGAGATCAGA

>2540

CAACAATCAATGGCGTCAGTCTTGCCTAGGAGAGCCTCATTTACTAATGAACTCCCTCT

CTGTTTAAACAGGCAAAATCATCATGCATGACCCCTTTGCCATGCGGCCCTTCTTTGGCT  
ACAACCTTCGGCAAATACCTGGC

>2541

GGGATCTCCTGGGTGGGGAGCTGGCGGCTCGCGGGCCGGCACTGAGTCCCCGTGCTT  
CCCCCTTTCCTAGGCAAGGAGAAGGAGCCCCCTGGAGTCGCAGTACCAGGTGGGCCCCG  
CTACTGGGCAGCGGCGGCTTCGGCTC

>2542

CCCAGGATGAGTGGGTGGGGTGAGGGGAGCCCCGACTCCCGCCCTAACGCGGCCCC  
CTCGCCCCCTGCAGCCTAATGGCACTCGAGTGCCCATGGAAGTGGTCCTGCTGAAGAAG  
GTGAGCTCGGGTTTCTCCGGCGTCA

>2543

ATACCACCCAGCTTCTTTGTGCTTGTTTTTGCTAAAAGTGTGTTTTCTCTTCTATTCCCTT  
GGCTCACAGGGACCCGAGTGTATAGCCCTCCAGAGTGGATCCGCTACCATCGCTACCAT  
GGCAGGTCGGCGGCAGTCTG

>2544

ATGGGGAAGACCTTTGCAGTGTA AAAACAAGTTGAGTCATTCATAACCTCGTCTATCCT  
CCTTTCTGCAGAAATGTCAGCATCTCATTAGATGGTGCTTGGCCCTGAGACCATCAGATA  
GGCCAACCTTCGAAGAAATCCA

>2545

GTGGGAGGCCATAGCTTGGGGATGCTGGCAATGTGTGGGATGGGCCCAGGGAAGGCC  
TCTGGCCTACTAGGGGCTCTGGCCCTGACCCACGGCCACTCACTCCTCAGAGACGTCT  
CCCACAACCTGCTCCGGGCGCTGGA

>2546

GCGGCACCGCCTCTTGCTGCTCAGCTGTGGGGGGCTTCCATCAGCTTTGCCGAATCCCC  
CGTCTCTTCCAGGGATATAAGCAACAACAAGATTTCTACGTTAGAAGAAGGAATATTTG  
CTAATTTATTTAATTTAAGTGAA

>2547

TTGCCAGTGGGGGGCTGGCATAGACCCCTTCCACCAGACCTGGTCCCCAACACCTGCC  
CCTGCCCTGCAGAAACCTGAGTGGGAACCCGTTTGAGTGTGACTGTGGCCTGGCGTG  
GCTGCCGCGATGGGCGGAGGAGCAG

>2548

CCCCCGCCACCTCCTGCCCCACCTGTAGGGGGCCCCACCCTCCTCCAGCACGTCTTCC  
CTGCCTCCCCAGGGGGCCACCCTGGTGGGGGGCCCCACGGACCTCTGGCCTCTGGCCAGCT  
AGCAGCCTTCCACATCGCTGCCCC

>2549

GGGCAGAGCCTGGTACCCCCGTCTTGGGCCCACACTGACCGTTGACACCCTCGTTCCC  
ACCGGTCTCCAGCGGTGCACCCGCTCTGCCCTCGGACACGGAGATCTTCCCTGGCAA  
CGGGCACTGCTACCGCCTGGTGGT

>2550

GCGGGCTGCTGTGAGGGTGGGAGGATGGAGGAGTGCCCTGAGCCCCCTGCCATCCCA  
CACCCGCCCCCAGGAGCCTAGACGTGTGGATCGGCTTCTCGACTGTGCAGGGGGTG  
AGGTGGGCCCAGCGCCGCAGGGCGAG

>2551

GGTCCCCAGTCTGTTCGTCTCTGGTGTCCTGGGCCCTGGCCCGGCGCCTCACTGTGCAC



TCGCCACCCAGGCCAGTGCAGGATGCCGAGAACCTCCTCGTGGGAGCGCCCAGTG  
GGGACCTGCAGGGACCCCTGACGCC  
>2552  
GGTCTGATGGCTCGCTCTCCTTCCCTCCCCTCTTCCTGGGAAGTTCGGGTAGGGGGAGT  
CTGGGCTTCAGGCTGGGATGGGGTCTGTGGAGCTGAGGCGGCCCCCTGCCACCAGG  
TCATGGTATTCCCGGGCCTGCGTC  
>2553  
CAGGCAGTTGGGCATCTCTGACGGTGGCCTGTGGGCAAATCAGGGCCCCAACACCTC  
CCCTCCTCACAGGGACCCCGGAGAACGGCAGCGAGCCTGAGAGCAGGTCCCCGGACA  
ACAGGACCCAGCTGGCCCCCGCGTG  
>2554  
CCTTCGTGCCCCGGCTGCCCCCTGGGAGACCAACGATACCCTGTTCTCAGTGGTAGCACT  
GCCGTGGCTCAGTGAGGGGGAGCACGTGGTGGACGTGGTGGTGGAAAACAGCGCCA  
GCCGGGCCAACCTCAGCCTGCGGGTG  
>2555  
GTGTCCAGGAGGCGACAGGCTAAGGGCAGAGTCCTCCACAGAGCCCAGGCTGACACC  
ATTCCCCCGCAGAGGTACAGCCCCGTGGTGGAGGCCGGCTCGGACATGGTCTTCCGG  
TGGACCATCAACGACAAGCAGTCCC  
>2556  
GAGGGAGGGACGCCAATCAGGGCCAGGCCTCTCACCTGCCACCTGGGCTCACTGACG  
CCTGTCCCTGCAGCTGACGGCCTCCAACCACGTGAGCAACGTCACCGTGAAC TACAAC  
GTAACCGTGGAGCGGATGAACAGGA  
>2557  
CAAGCACCCCCTGCCCCGCCACCGCCACCCCTGTCCCGTTCACTCACTGCGTCCCA  
CCGCCCCGGCAGGTGGACCTTTGGGGATGGGGAGCAGGCCCTCCACCAGTTCAGCC  
TCCGTACAACGAGTCCTTCCCGGTT  
>2558  
GGGCTTCTGCCGAGCGGGTGGGGAGCAGGTGGGGGTGCCGCGGCTGCCCCACTCGGG  
CCTGTCCCCACAGGTGAGTACCTCCTGACCGTGCTGGCATCTAATGCCTTCGAGAACC  
GGACGCAGCAGGTGCCTGTGAGCGT  
>2559  
CCCGCTGCCCTCGCCTGGGGGTGTTCTTTACACGTGGGACTTCGGGGACGGCTCCCCT  
GTCCTGACCCAGAGCCAGCCGGCTGCCAACACACCTATGCCTCGAGGGGGCACCTACC  
ACGTGCGCCTGGAGGTCAACAACA  
>2560  
CGGTACAGCTGCAGGCCGTGGTTAGGGATGGCACCAACGTCTCCTACAGCTGGACTGC  
CTGGAGGGACAGGGGCCCGGCCCTGGCCGGCAGCGGCAAAGGCTTCTCGCTCACCGT  
CTCGAGGCCGGCACCTACCATGTGC  
>2561  
GGCCGCCACCAGCCCCAGCCCCGGCGTGTGGCCTACCACTGGGACTTTGGGGATGG  
GTCGCCAGGGCAGGACACAGATGAGCCAGGGCCGAGCACTCCTACCTGAGGCCTGG  
GGA CTACCGCGTGCAGGTGAACGCCT  
>2562  
CTGGGCCGGGCTCTGCTTTAAACTGGATGGGGCTCTCAGGCCACGTCGCCCCCTTGTT

CTCGGCCTGCAGAGGGAGGCTGGCGGGTGTGCGCTGAACTTTGGGCCCCGCGGGAGC  
AGCACGGTCACCATTCCACGGGAGC

>2563

CCATGGGTCCCCCAGTCCTTCCAGCAGGCCAAATAGACCTGTGTTGGAGGTAACCCCA  
CTCCCACGCCAGGTGCTGATCCGGAGTGGCCGGGTGCCCATTTGTGTCTTGGAGTGTG  
TGTCTGCAAGGCACAGGCCGTGT

>2564

GGGCCTGCAGGCAGAAAGTGGGGCTGACAGGGCAGAGGGTTGCGCCCCCTCACCACCC  
CTTCTGCCTGCAGCGGTGGGCTGCACGTACGTTACAGCAACAAGACGCTGGTGCTGGAT  
GAGACCACCACATCCACGGGCAGTG

>2565

GAGCAGCGGGATCCCCGACTCTGTGACGTCACGGAGCCCTCCCGTGATGCCGTGGG  
GACCGTCCCTCAGGCTGGCATGACGCGGAGGATGCTGGCGCCCCGCTGGTGTACGCCC  
TGCTGCTGCGGCGCTGTCGCCAGGG

>2566

GCTGTGCCCCCTGCCTGCCCCAGTACGAGCGGGCCCTGGACGTGGCGCAGAGCCCAA  
GCACGAGCGGCAGCACCGAGCCCAGATACGCAAGAACATCACGGAGACTCTGGTGTG  
CCTGAGGGTCCACACTGTGGATGACA

>2567

CGTGTAGAGAGGAGGGCGTGTGCAAGGAGTGGGGCCAGGAGCGGGGCTGGACACTG  
CTGGCTCCACACAGGGGCCAGCAGGGAGCTCGTATGCCGCTCGTGCCTGAAGCAGA  
CGCTGCACAAGCTGGAGGCCATGATGC

>2568

CCCCCTTTTGCCTGCCCCCACCCTCCCTCTACCTCCCTGTCTCTGCACTGACCTCACG  
CATGTCTGCAGGAGACCTCATCCACCTGGCCAGCTCGGACGTGCGGGCACCACAGCCC  
TCAGAGCTGGGAGCCGAGTCACC

>2569

GGGCCATCGTGGGTGTCCCCCGGGTGGTTGAGCTTCCCGGCAGGCGTGTGACCTGCGC  
GTTCTGCCCCAGGCCACTACCTGTCTGAGGAACCTGAGCCCTACCTGGCAGTCTACCT  
AACTCGGAGCCCCGGCCCAATGA

>2570

TGGGCTCTGAGACTGCGACATCCAACCTGGCGGAGCCTGGGCTCACGTCCGCTACCCC  
TTCCCTGCCCAGGAGCAGAGACCCAGCGGGGAGTTACCATCTGAACCTCTCCAGCCAC  
TTCCGCTGGTTCGGCGCTGCAGGTG

>2571

GGCTCGGCTCTATCCTGAGAAGGCACAGCTTGACAGTGACCTCCTGGGCCCCGGCGGCT  
GTGTCCTCACAGGAGCCGACAGCGGATGTAAACTACATCGTCATGCTGACATGTGCTG  
TGTGCCTGGTGACCTACATGGTCA

>2572

TGACTTGCCTGGGATGCCACACGTGTTGGGCAGCAGACCGAGCCTCCCACCCCTCCCT  
CTTGCTCCCAGGTACCACGGCCCACGTGGGCATCATGCTGTATGGGGTGGACAGCCG  
GAGCGGCCACCGGCACCTGGACGG

>2573

CCAAGCTCTGCCCCTCTGCCCCCGCATTGGGGCGCCCTGCGAGCCTGACCTCCCTCCT

GCGCCTCTGCAGGGGCTCAGCCCTGCCTGGTTCCCTGCAGCACGTCATCGTCAGGGACCT  
GCAGACGGCACGCAGCGCCTTCTT

>2574

CTCCGTGGGAGGTTGGGCAGGGTGGTCCTGCCCCGTGGCCTCCTGCAGTGCGGCCCTC  
CCTGCCTTCTAGGCGACGCAGCCCTTTTTCGCTTCCGGCGCCTGCTGGTGGCTGAGCT  
GCAGCGTGGCTTCTTTGACAAGCA

>2575

GGCAGCCTCTTCCTGCCCAGCCCTTCCTGCCCCCTCAGCCTCACCTGTGTGGCCTCCTCT  
CCTCCACACAGCACGGGGCATGTGTCCAGGCTGAGCCCGCTGAGCGTCGACACAGTC  
GCTGTTGGCCTGGTGTCCAGCGTG

>2576

AGGTGGCTTCTCATCCCTGTCCTGAGCAGGTCTGAGCTGCCGCCCCGCTGACCACTGCC  
CTCGTCCTGCAGGTGGCTGGGAGCCCGAGCCCCACACCTGCCGGGCAGCAGGTGCTG  
GACATCGACAGCTGCCTGGACTCGT

>2577

GTGACTGGACGGGGGTGGGCTGTGTGTGTGACACATCCCCTGGTACCTTGCTGACCCG  
CGCCACCTGCAGTCTGGTGTGCTGGCCCTCCGGCGAGGGAACGCTCAGTTGGCCGGA  
CCTGCTCAGTGACCCGTCCATTGTG

>2578

GGGGTGAGAGGAGGGGGCTCTGAAGCTCACCCCTGCAGCTGGGCCCCACCCATATGCCT  
CCTGTACCTCTAGATGAAGACCTGATCCAGCAGGTCCTTGCCGAGGGGGTCAGCAGCC  
CAGCCCCCTACCCAAGACACCCACAT

>2579

GTAAACATGGGCTTGGCTGCAACTGCCTCCTGGAGGCCGGGATGAATTCACAGCCTAC  
CATGTCCCTCAGGTCCAGCACTCCTGGGGAGAAGACAGAGACGCTGGCGCTGCAGAG  
GCTGGGGGAGCTGGGGCCACCCAGC

>2580

GCGTAGCCCCGGGATGCCCTAGCCCCTCCCTGTGAGCTGCCTCTCACAGGTCTGTCTC  
TGCTTCCCCAGGACTGGTGGAGGGTCTGCGGAAGCGCCTGCTGCCGGCCTGGTGTGC  
CTCCCTGGCCCACGGGCTCAGCCT

>2581

GAGGGGGCTGCCAGGGGTAGGCTACAGGCCTCCATCACGGGGGACCCCTCTGAAGCC  
ACCCCTCCCCAGGTCTTGCTGGAAGCCCTGTACTTCTCACTGGTGGCCAAGCGGCTG  
CACCCGGATGAAGATGACACCCTGG

>2582

GCCGTTGCCAAAGCCCTGCTGTCACTGTGGGCTGGGGCCAGGCTGACCACAGGGCCC  
CCCCGTCCACCAGAGCCTCCTGGTGTACATGCTTTTTCTGCTGGTGACCCTGCTGGCCA  
GCTATGGGGATGCCTCATGCCATG

>2583

TCTGGTGGCCGCTCACTCGAGGCGGGCATGGGGCAGTAGGGGCTGGAGCGTGTGACT  
GATGCTGTGGCAGGTCTGAGGAGCTCTGGCCATGGATGGCCACGTGCTGCTGCCCTA  
CGTCCACGGGAACCAGTCCAGCCCA

>2584

GCCAGCAGGAAACACTCCTGTTGGGTTTTGATGAGGCCCTGGCCCCGGCCTGGGGCTC

TGTGTGTTTCAGCACTCTACCCAGACCCTCCCGGCCCCAGGGTCCACACGTGCTCGGC  
CGCAGGAGGCTTCAGCACCAGCGA

>2585

TCCTGACCAGCCTGGCTCCGGGGTGCCGGAAGGGCTGGGGTGCGGCACCCACGCCAC  
CCCTCTCCGGCAGGGCATGGTCCTGGGGCTCCTGTGCCGTGTATGACAGCGGGGGCTA  
CGTGCAGGAGCTGGGCCTGAGCCTG

>2586

GCCTGCACTGCGCGGTCCCCGCAGCTCCCGCCCTGCCACCCGCTCCTACTGACCCGCA  
CCCTCTGCGCAGGAGCCGCGCTGTGTTCTGGAGCTCACGCGCTACAGCCCGGCCGTG  
GGGCTGCACGCCGCCGTACGCTG

>2587

GCGTCCCGCCCCCTCGCAGGGCCCCGCCCCGGCAGCGTCCCTCCCGCCCTCCTGACCG  
CGCCCCCACAGGTGTGCCTGCTGCTGTTCCGCGTGCACTTCGCCGTGGCCGAGGCC  
GTACTTGGCACAGGGAAGGGCGCT

>2588

GGCTGGGCCGGTGGGCGCGGGGCTGGGCGCACACCCCAGGGCTGCAAGCAGACAGA  
TTTCTCGTCCGCAGGCTGCCAGCAGCTACGCTTCGTGCGCCAGTGGTCCGTCTTTGG  
CAAGACATTATGCCGAGCTCTGCCAG

>2589

CGGCCGGGGAGGGCGTCTTAGCTCAGCTCAGCTCAGCTGTACGCCCTCACTGGTGTGCG  
CCTTCCCCGCAGCTCGTGTCTTCCTGTGTGGACTCCCTCTGGAGCGTGGCCCAGGCC  
TGTTGGTGCTGTGCCCTGGGACTG

>2590

GGGAGAGGGACACGCCCTGGGCTCTGCCCAGGGTGCAGCCGGACTGACTGAGCCCCCT  
GTGCCGCCCCCAGTTCCGCCACAAAGTCCGCTTTGAAGGGATGGAGCCGCTGCCCTCT  
CGTCCTCCAGGGGCTCCAAGGTAT

>2591

GCTCCTGGAGCAGGGAGAGCGCTGGCCTCTTCCTCTCCGGCTCCCTCCATTGCCTCCG  
GTTTCTCCCCAGGCTCCCGGACGTCCCTGCTCCTGGCTTTTGCCCTGCTCTGCCTGCCC  
TGGCTTCAAGAGGCTGGTGCCGT

>2592

AAGCAACAATGGGACCTGGTCTCCAGCATAGAAACCAGCAGTCCTTCTTGGTGGGGG  
GTCCTTCTCCTAGGAAGAAACCTATATCCCAAAGGACCAGAAAGTATTCATTCTGCATG  
ACTCCCAGACCTCCTTCTGCTTCT

>2593

GGCGGGGATGGGGGAGACCTGTGGTCAGGGCTCCCGGGCAGCACAGCCACTGCCGGT  
CCTTCCCCTGCAGAATCTAGAGCTGCTCCGCATCTCCCTGCTGCTCATCGAGTCGTGGC  
TGGAGCCCGTGCGGTTCTCAGGA

>2594

TGGATGAATGAGAGAGGGAGGGAACATTGCCCAAGCGCTTGGCCTCTCCTTCTCTTCC  
TTCACTTTGCAGAGGCTGGAAGATGGCAGCCCGCGGACTGGGCAGATCCTCAAGCAG  
ACCTACAGCAAGTTTGACACAACT

>2595

GGGAAGGGTAAGGAGGCAGGGGCTGCCTGGGCTGGCTGGCACCAAGGACCCTCTTCCT

CTGCCCTGCCCAGGTGAAGTGTCGGACGCACCCTCATCGACATTGGTTCAGGCCCA  
CCGTGTACCAGCTGCTCAGTGCCTG

>2596

GTGGCTGGTTGGGGCAACAGAGGCCTGAGCGTAGAACAGCCTTGAGCCCTGCCTTGT  
GCCTCCTGCACAGGGAATGCTGGCAGGATAAGGAGCGCCAGCTGCGAGCCAGGGTGA  
AACGGGTCCTGCCCATCGACGTGCAC

>2597

CCCCGTCTGCACCGGGTGCAACGAGAGCCATGGTGGGGTGGGACCGCCGTGCAGCCC  
AAGGCCCCCTCAGTTGGCAGGGACCTGGCACTCCATGGCCATGGCGACCAACAACATC  
TCCCTCATGGCGACACTGAAGGCCC

>2598

GATTTTAGGAGTGACAGTGAAGGCAACTCCAATTCAAGTGGCCACTCATCCTATTGTCA  
CCACCTTTCAGGGAGAACAACAGCTGTGTTGAGAAGAAGGTCCTTGGAGAGAAGACT  
GAGAATCCAAAGAAGTTCAAGATC

>2599

ACACACCTGCACAGGACTCTGCTGAGACGGAGGCTTCATCTTCCTTTTGGTTCTTCTCT  
TCTTTCCCCAGATACGGTGGCGAACGAGGCCACGCTGCTCGATACTGACTACGACAAT  
TTCCTGTTTCTCTGCCTACAGGA

>2600

AAGGCCTCTGGAGCTCCCCAGCTCTCATGGAAGCCCCAGGGGCCAGGACTGACCCA  
GCCTCTTCCACAGCCAGAGTCCTGGTGGAGGACGATGAGATCATGCAGGGATTCATCA  
GGGCTTTCAGGCCCCTGCCCAGGCA

>2601

AGGTCAGATATGAAACAGGTGGGCTGGCACCTGGGCACAGTGCTTGCCCCTGCTGCCT  
CTTCCCTCCCAGGTATGGGAAAAGACACAAAGAGGACACGCTGGCCTTCTCGGAGTG  
GGGTCCCCGCATGCTGCTGTCCCC

>2602

CAGACCCCCTCATGGCCCCAGCCCCTCTTAGGCCCCCTCACCAAGGTGAGCTCCCCCTCC  
CTCCAAAACCAGACTCAGTGTCTCCAGCAGCGAGCGTGCCCACCAGGTGCTGCGGA  
TCCGCAAACGTGCCAACTCCTTCCT

>2603

GCTGGACTACCGGCGCCCGCGCCCCTCGGGATCTCTGGCCGCTGACCCCCTACCCCGC  
CTTGTGTGCGACAGGTGACCAGTGCTTGGTCTTGCCCTTGGAGCACCCGTGCGCCAG  
CCTGTGCTGCGGGCACGGCACGTG

>2604

GGGGCGGGGCTGGGGCCGGGTTGGGGGCGCGGCACCAGCACCAGCTGCCCCGCGCCCT  
CCCCTGCCCCGAGAGGTGAGCTTCCTCAATTGCTCTCTGGACAACGGCGGCTGCACGC  
ATTACTGCCTAGAGGAGGTGGGCTG

>2605

AGGACCAAGACAGGAGGGCAGTCTCGGGAGGAGTGCCTGGCAGGCCCCCTCACCACT  
CTGCCTACCTCAGTGAAGTTCCCTTGTGGGAGGCCCTGGAAGCGGATGGAGAAGAAG  
CGCAGTCACCTGAAACGAGACACAGA

>2606

AACCCAGGTGCCCTGGACTGGAGGCTGTCAGGAGGCAGCCCTGTGATGTCATCATCCC

ACCCCATTCAGGTGGTCCTGCTGGACTCAAAGAAGAAGCTGGCCTGCGGGGCAGTG  
CTCATCCACCCCTCCTGGGTGCTGA

>2607

GGGCCTCAGGAAAGTGCCACTGGGGAGAGGCTCCCCGCAGCCCACTCTGACTGTGCC  
CTCTGCCCTGCAGGAGAGTATGACCTGCGGCGCTGGGAGAAGTGGGAGCTGGACCTG  
GACATCAAGGAGGTCTTCGTCCACCC

>2608

GAGGAAAGACATGGCAGCTGAAGCAGAGGCTTACTGGGTATAAATGTGGGCTCGTTTC  
TTCTTTTAACAGTTCCTGTAAAGGTCAAGACACTGTCAAAGGCCGTGTTCCATTCAAT  
GGACAAGATCCCGTTAAAGGACA

>2609

CTGTCTTCCTCACTGCCTCTGAGTGCTTTGATGTGCTGACTCTCACCTCTGATACTCTTC  
TCTTCCACAGAGGGAGCCGGTCCTTGCTGCACCTGTGCCGTCCCAGAGCTACAGGCC  
CCATCTGGTCCTAAGTCCCTGC

>2610

CCTCCGTGCCCCGCCCGGGCGGTGCAGCTGGCCCCGGGTGCTCACGCTCGACTCTCTTT  
CTTCTTTTCCAGGGTCTGCGCTTCGCAGCCGGGATGAAGCTGGTTCCGTCGCCCTGAT  
GTACCTGGGTTCGCTCGCCTTCC

>2611

TGAATGGGAGCAGGGACAGGCCTGGGCGTCACCTGAACGCACGCGAATCGGGTCTGC  
TTGTGTTTTCCAGGTGGAATAAGTGGGCTCTGAGTCGTGGGAAGAGGGAAGTGC GGAT  
GTCCAGCAGCTACCCACCGGGCTC

>2612

CGGTGTTGGGGCCAAAGCTCTGCTTGATGGGGTCTCAAGTTGCCTTTCTTCCCCCTCCC  
CCCGCCCGCAGCAGTCCGGATGCCGCCCGCATCCGAGTCAAGCGCTACCGCCAGAGCA  
TGAACAACCTCCAGGGCCTCCGG

>2613

TGAAGGAGTTATTTGATTGAATGGGGGAAATACTCCCCTGGGCCCAGCTGAGGTCTCT  
CTCTTCTCGCAGTTTCCATGTGGTACACACTCCCCCGCTGCACCCTGACTTCAAGAGGG  
CCCTCGGGGACCTGCCCCACCAC

>2614

AGACAGAGAGGTATGAAGACAGGAGGGTTTTCCAGCATGAGCTCAGCTCTTCTTGTTT  
CAACTCACACAGATGGAGGAGACTCTGAGCAGTTCATAGATGAGGAGCGTCAGGGAC  
CACCTTTGGGAGGACAGCAATCTCA

>2615

TGAGGGATTAGACATTTCTGCCATGTCAAGTGTTGTCTGTAATCTTCCTTGTTTGCTTG  
TCTTTTTCAGGAAGTGAATAAGAAGATAACAGTGTTTCAAATGCCGTGAAACACGGCA  
TCATGCTCTAACTTCAGTATAC

>2616

AGACAGAGAGATATGAAGACAGGAGGGTTTTCCAGCATGAGCTCAGCTCTTCTTGTTT  
CAACTCACACAGATGGAGGAGACTCTGAGCAGTTCATAGATGAGGAGCGTCAGGGAC  
CACCTTTGGGAGGACAGCAATCTCA

>2617

TAAACCAATGAGGTATTAGACATTTCTGCCATGTCAAGTCTTGCCTATAATCTTCCTTG

TCTTTTTTCAGGAAGTGAATAAGAAGATGACAGTGTTCAAATGCCTTGAAACATAATGT  
GATCATGCTCTAACTTCAATA

>2618

GAAGGCCTGGTCCTTCCTTGGTCTGCGCAGCCCCCTAACTTATCTTGAACCTCCACTGCC  
ACCCCTCGAAGGACGTGGACGATGCCACTCTGTCCCGCCTGGAAGTAGAGCGCAAGAT  
TGAGTCTCTGATGGATGAGATTG

>2619

CTGTGCACGAACTGCGTGGCCCGCGTGGAATTTGCGCCGCTGTCCATCCTCTGCCTGC  
TCCCGGCCGTAGGAGCTGCGAGACCTGCAGGTGAGTGTGGAGAGCCAGCAGGTGCAG  
CAGGTGGAGGTGGAAGCCACGGTGA

>2620

GCGAGGCGGGACGCTGGGGTGGTGTGCGCGTCCCAGCCGACTAAAGCCTGGGTAC  
CCCCACTTCTCAGTACGCGGACCTGTCCGACGCTGCCAACCGBAACCACGAGGCCCTG  
CGCCAGGCCAAGCAGGAGATGAACG

>2621

TGCGCGCTCGGGCCCGGGGAGCGGACGATGAAATGTTCTGCAACTGGCCCCTTCCACT  
CTCCTACCCCAGAACGAGGCGCTGCTCAGGCAGTTGAGAGAGCTGGAGGAGCAGTTC  
GCCCTGGAGGCGGGGGGCTACCAGG

>2622

TAGCAGTGGGAGCCTAAGAGGAGAGATTCCCACGCCTTCCCCCTTGAACCCTTTATCCT  
GCTTTCTTCAGTGCTGAGGTGGAGCCTCCCCAGGACAGCCACAGCCGGAAGACGGT  
TCTGATCAAGACCATTGAGACCCG

>2623

CTATGATCCAAAGGAGTAGGATGGAGGGTGGCGCTGAATGGCTTGTGCCATCATATGC  
CCTGTCCCCAGCAGGTGGTGACAGAGTCCCAGAAGGAGCAGCGCAGTGAGCTGGACA  
AGTCTTCTGCCCACAGTTACTGAA

>2624

CATCTCCTATCCGAGTCCCCCAGTTCCCCCTGTCAACCCTGATTCCCCTGATCTAGCACC  
CCCTCTGCAGGCGCTGCGCCCCTCATCTGTCTCGGATTGTGGGAGGCTGGGAGTGCG  
AGAAGCATTCCCAACCCTGGCA

>2625

TTGCTCCTCTGTCCCTTCTCTCTTTCCTTATCATCCTCGCTCCTCATTCTGCGTCTGCTT  
CCTCCCCAGCAAAAGCGTGATCTTGCTGGGTGCGCACAGCCTGTTTCATCCTGAAGAC  
ACAGGCCAGGTATTTACAGGTC

>2626

GGTCTGAGGGAGGAGGGCCAAGGAACCAGGTGGGGTCCAGCCCACAACAGTGTTTTT  
GCCTGGCCCGTAGTCTTGACCCCAAAGAACTTCAGTGTGTGGACCTCCATGTTATTTC  
CAATGACGTGTGTGCGCAAGTTCA

>2627

TGAAAGATAGGATTGCCCAGGCAGAACTGGGACTGACCTATCTCACTCTCTCCCTGC  
TTTTACCCTTAGGGTGATTCTGGGGGCCCACTTGTCTGTAATGGTGTGCTTCAAGGTAT  
CACGTCATGGGGCAGTGAACCAT

>2628

ATCGAGTCTCACTAGCTCCAACCAGTTGTGGGTGACAGATCCTACACATCCATGTCTCT

TTTCTCTGCAGGCCCCATGGGTCCACCTGGAGAAATGCCATGTCTCCTGGAAATGATG  
GGCTGCCTGGAGCCCCTGGTAT

>2629

AACACCTCGTGGCAGCAAGTGGGAGTCTTCACTGGCCTGCCCCCTCCTTCTGTGTGGGG  
CACTCTCCACAGGGCTTCGAGCTCATCTAGATGAGGAGCTCCAAGCCACACTCCACGA  
CTTTAGACATCAAATCCTGCAGAC

>2630

GACCCCAGGTGAGGGAGGTGGCTTAGAGACAAAGTGGTCAGTGGCCTGACCCGGACT  
CCTCTGCTCTCAGCCCTCAGTCTGCAGGGCTCCATAATGACAGTAGGAGAGAAGGTCT  
TCTCCAGCAATGGGCAGTCCATCAC

>2631

CAAACAATTAAATGTTTAAATTAAGATTAAGACACTAGAGAATGATTTATTTGCTGTCTT  
TTAATTGCAGCAAATCCTTGCTGTTCCACCCATGTCAAACCGAGGTGTATGTATGAG  
TGTGGGATTTGACCAGTATAA

>2632

TCATTGTATAGATTTGTGTCTTATAATGAGTCCCATTAATTTCTCCCTCCCTTTCTTCGTCT  
TCTTGCAGCGGAATTTTTGACAAGAATAAAATTATTTCTGAAACCCACTCCAAACACAG  
TGCACTACATACTTACCCA

>2633

AATAAAAATAATGGTTGATTTACTTAACAAATGAGAATAAATAAAACATTTTTTTCTTTG  
AAAATTTTCAGCCAGATCACATTTGATTGACAGTCCACCAACTTACAATGCTGACTATGG  
CTACAAAAGCTGGGAAGCCTT

>2634

AGATTGACAGTCACCATCTCCTTTCTTGAATACATAGATGGATTCTTACCTTAGCTTTCT  
CATTTTTTCAGGTAAAAAGCAGCTTCCTGATTCAAATGAGATTGTGGAAAAATTGCTTCT  
AAGAAGAAAGTTCATCCCTGA

>2635

TATATGATAGACACTTTATATAAGAAAACTTCAACAGCAACAAATTAAAAATTTTTTCAT  
CATTTTCTAGGTGGACTTAAATCATATTTACGGTGAAACTCTGGCTAGACAGCGTAAAC  
TGCGCCTTTTCAAGGATGGAA

>2636

ATTTTAAAATCCCTAAAAATGTGTTCCCTTAACCTTTTTTAAGTATGTTTATTTATTTAT  
TTTTTTAGATAATTGATGGAGAGATGTATCCTCCACAGTCAAAGATACTCAGGCAGAG  
ATGATCTACCCTCCTCAAG

>2637

GCATTCCAGTTGCTTGAAAGCTTGTGATCAGATGCAATAAATGTTTTTATTATTTATTTTG  
TGCAAATAGGAGAGACTATTAAGATTGTGATTGAAGATTATGTGCAACACTTGAGTGGC  
TATCACTTCAAACCTGAAATT

>2638

AAGGCAAGCTGAATACAAACAGTAAATATGCCTAAAATTCTGGTTTTACAACATAATTT  
ACTTTCCACAGGTGCTGGTGGTAGGAATGTTCCACCCGCAGTACAGAAAGTATCACA  
GGCTTCCATTGACCAGAGCAGGC

>2639

AAGAATCAAACCTGTTTTTTATTTTGTGAAGTTTGACATTGGTTGTATCTCTGTCTTCATC



GCCTTCACAGGAGAAAAGGAAATGTCTGCAGAGTTGGAAGCACTCTATGGTGACATCG  
ATGCTGTGGAGCTGTATCCTGC

>2640

TAAATATTAAACATGAAATTTTATTGTTTGCATTTTGAATTTTTTTTGTGTTTTGTTTTTTT  
TCTTATAGCACGACTGAAAATGTAGCTGTTTATATCTGGGACAACCTCCAGAAAGTTCT  
TCCTGTAGGAGTTCTTTAT

>2641

TATCTAGTATACTAGATTTTAAGTTGAAGTAGGATCTTCAGGAGTCTAATCATTATTTCTT  
TTCTTTTAGGAGAGAAGACGATCTGCACTTCGCATTTTGGCATTGACATTTAATTTTAGG  
GTCCTTTATATAGAAGGGA

>2642

AGTTAACAAAATAAAGGGTCTTACAAAATAGGCAATAATAATAATCACTTATTATTA  
TTACATGAAGCTACATGAATGTGTAAGATCTTGAGGAAGACAGCAGAGAGAGAGAG  
AGAGATCAGAGATCCCAGGGTTA

>2643

ATAAATATTGTCTGATTGGCCCAGGAAAATGTTTGCCATTTCTCATATGTAGTATTTGACT  
GACTTTTCAGGACAGGAAGATGTACCCAAAGCGCATAGCTAAAAGAAGGTCCCCC  
GCAGATGCCATCCCCAAAAGCA

>2644

CCCAGAGCCTGTGACCTCTCCTCGCTGTCGTCATCCTCTACACTCAGGGTCTATCTTCT  
TCACCCTTCAGTCTCACACAGGTCCCACAGCACAGAACCCGGCTTGGTGCTGACACTA  
GGCCAGGGCGACGTGGGCCAGCT

>2645

GGGGAGTGGCCTACATGAGAATGGACTGCGAGGCCAGACGTTGCATTAATGAGGGCAT  
CCGTGGGCACAGGTCTATTCCTTCGGCTGCAATGATGAGGGTGCCCTGGGAAGGGACA  
CATCAGTGGAGGGCTCGGAGATGG

>2646

ACTGACCCTTCTGGATTTCACTGGCACGGGGCAGGCAGGACTGGCTGATAAGTGCCTG  
TCCTCCTTCTAGGACAATAACGGTGTGATTGGACTGTTGGAGCCCATGAAGAAGAGCA  
TGGTGCCTGTGCAGGTGCAGCTGG

>2647

CTTGTTCTGGGGCTGGCCTAGCCTTGGGCCCTTACAGTTGTGGCCTGCATCCCTTACCTT  
TTCATCCTTAGGAAACGACCACTTGGTGATGCTGACAGCTGATGGTGACCTCTACACCT  
TGGGCTGCGGGGAACAGGGCCA

>2648

TTAAACTCGGGGCAGAGAGAAGCCATGTGTGTCTGTCTGTCACTGACCGTGGCTTTCC  
CTTTGCCTGCAGAACGACTCCTGGTCCCCAAGTGTGTGATGCTGAAATCCAGGGGAAG  
CCGGGGCCACGTGAGATTCCAGGA

>2649

TGTGGGAGGAGATTGAGAAGGGCAGCTCTCAGAACACCTTCACCCCTGATGGCTCCG  
GCCTTTCCCCCAGGAACCTCCGGGCACAGAATCTTGCTTCATACCCAGAACCTAACATC  
CTTCAAGAATTCCACCAAGTCCTG

>2650

CTAGCCTGCCACCCATTTTGCCTGTAGCACGCCCTCTTGCTATTGCTCATCTCTCTCCCT

CCTCCCATAGGAAAAGCATACAGCCTGGGCCGGGCTGAGTATGGGCGGCTGGGCCTTG  
GAGAGGGTGCTGAGGAGAAGAG

>2651

GGTTTCTCCTGCTACAGAAAGGTGGGCTGGGGATCCTGGAGACAGCTGTACCCATTTC  
TCTCTCTTGCAGGTCGTGTTTTCGCCTGGGGCATGGGCACCAACTACCAGCTGGGCAC  
AGGGCAGGATGAGGACGCCTGGAG

>2652

TAGCTTTTGGGCATCAGCTGTTCATGGAGCACTGGGGATGTTGGCTGATGTGTCTCCTTT  
CTTTATCTTAGATCCGAGAGACTGAGGTCATCGACCCCCAGGACCTCCTAGAAGGCCG  
ATACTTCTCCGAGCCCTACCAG

>2653

TGTCCCTGTCCCCTGCCCTGAGTCTCTTCCAAAATACGCTGAGTGTCTCTTCTCCTTTCC  
GCCCATCCAGGTGCCTCTAGATAACCATATCCCTGAGAGGGCAGGGTCTGGGAGCCAA  
GTCCCCACCGAACCCAAGAAAC

>2654

AAAGAGGGGTTCATCCTTAGGTCCTGATGAGGAGCTCTGACCCCCGCCTCTTCTCTCTC  
CTCCTCTCCAGCTCTGATTGTGGGTGGCATCGTGGGCATCCTCTTTGCCGTCTTCTGAT  
CCTACTGCTCATGTACCGTAT

>2655

AAGCTCTTACCTCACCTTCAAGCCTTTTCCTTACCCTGAGAGCCTCCTTTAATTGTCTCT  
TCTTTTTTCAGGCCAAGAGGCCCAGACAGAGTTGCCCCAGGCCCGGATCAGCTGCCCA  
GAAGGCACCAATGCCTATCGCTC

>2656

CTCTTGAGGAGCTCAGTATATCCGTCACAACTTCCTCCTCCACTGAGTGCTCCATTTTCT  
TCTGCAACAGCTCTATTGCCAGAACATGAATTCGGGCAACCTGGTGTCTGTGCTCACCC  
AGGCCGAGGGTGCTTTGTGG

>2657

GCACACAGGCCCAGTGATTCCATGTATTTTTGAGTGACCACTGCCTCTGTTCTGGCCCT  
TCCCCATCTAGAACCGCCGCTGGCACTGGAGCAGTGGGTCCCTGGTCTCCTACAAGTC  
CTGGGGCATTGGAGCCCCAAGCA

>2658

CCTATTCACCTTCCAGCCTTTTCCTTGCCCTGAGATTCTTTCTTAGTTATCTCCTTTTTTT  
TTTCCCCAGGCCAGGAGTCCCAGACAGAGCTGCCTAATCCCCGAATCAGCTGCCCAGA  
AGGCACCAATGCCTATCGCTC

>2659

GAGTCCTAGGTTGAGGAGGGGCTACACTCCTTCTGATCCTCTATGTCTGACACTTCTCA  
TTGTACTATAGGATTCAAGAAATGGAAGGATGAATCTTGTGAGAAGAAGTTCTCCTTTG  
TTTGCAAGTTCAAAAAGTAGAG

>2660

AGAGGATGTTAGAAAGATAACAGGTGCTCTGCTCTCTTCTTCAAACCCTCTTCCCTGTG  
TTCTCCTACAGAGATTGCTGATTTGCTCCTTAAGCAAGAGATTCACTGCCGCTAAGCAT  
GGCTCAGACCAACTCGTTCTTC

>2661

CTAATTCACCTTCCAGCCTTTTCCTTGCCCTGAGATTCTTTCTTAATTATCTCCTTTTTTT

TTTCCCCAGGCCAGGAGTCCCAGACAGAGCTGCCTAATCCCCGAATCAGCTGCCCAGA  
AGGCACCAATGCCTATCGCTC

>2662

CTCTGGAAGGTCTCAGTATATCCCTCACACCTTCCTTCTCCACTGAGTGCTCCATTTTCT  
TCTCCAACAGCTCTATTGCCAGAACATGAATTCAGGCAACCTGGTGTCTGTGCTCACCC  
AGGCGGAGGGTGCCTTCGTGG

>2663

GCACACAGGCCTGGTTATTCTATTGATTTTTGAGTGACCATGGCCCCTGTTCTGGCCCTT  
CTCCATCTAGAACCGCCGCTGGCACTGGAGTAGTGGGTCCCTGGTCTCCTACAAGTCC  
TGGGACACTGGATCCCCGAGCA

>2664

GAGTCCTAGGTTGAGGAGGGGCTACACTCCTTCTGATCCTCTATGTCTGACACTTCTCA  
TTGTACCATAGGATTCAAGAAATGGAAGGATGAATCTTGTGAGAAGAAGTTCTCCTTTG  
TTTGCAAGTTCAAAAAGTAGAG

>2665

AAACAAGTATGTACTGAATCAATTTGATTTATAAGTATATGCCAATTATATGATTATTTTCA  
TTTGGTAGGCTTGAGTTTGAAGAAACAGAAGAACCTGATTTTACTGCATTATGTCAGAA  
ATTAAAGATACCAGATCAT

>2666

ACAGTTTTAACATAGTATCCAGTGTGTGAATTATTTAATGAAATATTTGATCTTTATTTTT  
TGTTCCAGGGAGGTTATATTCAAAGAAAAAGGAACTGTGGGGAATCTGTATCTTTAT  
TGCAGCAGTTGACCTAGATG

>2667

TGATTTGAAAACGAAATAACACAAATTTTTAAGGTTACTGATTACTTTTTTCTATTCTT  
TCCTTTGTAGTGTCCATAAATTCTTTAACTTACTAAAAGAAATTGATACCAGTACCAAAG  
TTGATAATGCTATGTCAAGA

>2668

CCCTGCGATTTTCTCTCATACAAAGATCTGAATCTCTAACTTTCTTTAAAAATGTACATT  
TTTTTTTCAGGGGAAGTATTACAAATGGAAGATGATCTGGTGATTTCAATTCAGTTAATG  
CTATGTGTCCTTGACTATTT

>2669

TAGTTAGAATACTTCATTATTTTATATGATGGATGTACAATTGTTCTTATCTAATTTACCAC  
TTTTACAGAAACAGCTGTTATACCCATTAATGGTTCACCTCGAACACCCAGGCGAGGTC  
AGAACAGGAGTGCACGGAT

>2670

TGTTCAAGAGTCAAGAGATTAGATTTTGTTTTAAATTTTAATGATCATGTTGTAAC TTCA  
TCTTTTTCAGGTGAAAAATGTTTATTTCAAAAATTTTATACCTTTTATGAATTCTCTTGGA  
CTTGTAACATCTAATGGAC

>2671

CTGTGCCTCTGTGTGCTGAGAGATGTAATGACATGTAAAGGATAATTGTCAGTGACTTT  
TTTCTTTCAAGGTTGAAAATCTTTCTAAACGATACGAAGAAATTTATCTTAAAAATAAA  
GATCTAGATGCAAGATTATTTT

>2672

GCTTTTTTGATGCATAAAGCACAAATTGTAAATTTTCAGTATGTGAATGACTTCACTTAT

TGTTATTTAGTTTTGAAACACAGAGAACACCACGAAAAAGTAACCTTGATGAAGAGGT  
GAATGTAATTCCTCCACACACT

>2673

AAAACATTTTCATTTTTCTTTTTCTCCCTTCATTGCTTAACACATTTTCCTATTTTTATC  
CCCTCTAGGACTGTTATGAACACTATCCAACAATTAATGATGATTTTAAATTCAGCAAGT  
GATCAACCTTCAGAAAAT

>2674

ATGGAGCAGAAAATATTAATTCTGATTACACAGTATCCTCGACATTGATTTCTGTTTTTA  
CCTCCTAAAGAACTGCACAGTGAATCCAAAAGAAAGTATACTGAAAAGAGTGAAGGA  
TATAGGATACATCTTTAAAGAGA

>2675

TACTTTTAGTAAAAAATTTTTCTTTTTATAGAAGTAAGTATTTTATAATCTTTTTTTTTT  
TCCTTTAGCAAACCTTCTGAATGACAACATTTTTCATATGTCTTTATTGGCGTGCGCTCTT  
GAGGTTGTAATGGCCACA

>2676

AACTTCCAAAAAATACCTAGCTCAAGGGTTAATATTTTCATAAATAGTTACTTTTTTTTT  
TCATTTTTAGGAAGTACATCTCAGAATCTTGATTCTGGAACAGATTGTCTTTCCCATGG  
ATTCTGAATGTGCTTAATTT

>2677

ATGATTTTGATATGTACCTGGGAAAATTATGCTTACTAATGTGGTTTTAATTTTCATCATGT  
TTCATATAGGATTCACCTTTATTTGATCTTATTAAACAATCAAAGGACCGAGAAGGACCA  
ACTGATCACCTTGAATCTG

>2678

TTGAAGTGTATGTATAATCTGTGATTCTTAGCCAACTTGAAATGAAGACTTTTCCTTTAA  
ATATATCTAGGTATCTTTCTCCTGTAAGATCTCCAAAGAAAAAAGGTTCAACTACGCGT  
GTAAATTCTACTGCAAATGCA

>2679

TGATTTGAAAAAATCTACTTGTAATTCAAATGAACAGTAAAAATGACTAATTTTTCTT  
ATTCCCACAGTGTATCGGCTAGCCTATCTCCGGCTAAATACACTTTGTGAACGCCTTCTG  
TCTGAGCACCCAGAATTAGA

>2680

AAATGGTATTTTTTAAGAACAAAACCATGTAATAAAATTCTGACTACTTTTACATCAATT  
TATTTACTAGATTATGATGTGTTCCATGTATGGCATATGCAAAGTGAAGAATATAGACCTT  
AAATTCAAATCATTGTAA

>2681

TTTTAAAATTCATTTAACAAGTAAATTTTACTTTTTTTTTTTTTTTTTTTTTTTTACTGTTC  
TTCCTCAGACATTCAAACGTGTTTTGATCAAAGAAGAGGAGTATGATTCTATTATAGTAT  
TCTATAACTCGGTCTTCA

>2682

TGGAAAAATCTAATGTAATGGGTCCACCAAAACATTAAATAAATAATCTACTTTTTTGTT  
TTTGCTCTAGCCCCCTACCTTGTCAACCAATACCTCACATTCCTCGAAGCCCTTACAAGTT  
TCCTAGTTCACCCTTACGGA

>2683

TAACTTGAGGTTGCTAACTATGAAACACTGGCATTTAATGATTTAAAGTAAAGAATTCT

GTAATTTGTAGACTTCTGAGAAGTTCCAGAAAATAAATCAGATGGTATGTAACAGCGAC  
CGTGTGCTCAAAAGAAGTGCTG

>2684

TATATGGCAGCCACTTGCCAACTTACCCAGTACCATCAATGCTGTTAACAGTTCTTCATC  
CTTTTCCAGCTTCTACTCGAACACGAATGCAAAAGCAGAAAATGAATGATAGCATGG  
ATACCTCAAACAAGGAAGAGAA

>2685

TGTCTGTCGAGAATGTTGCACAGGGAGTTACAGAATGTTCTCATGACTGAATTGCTTTT  
AAATTTACAGTGTGCCTGCATTTGAAGTCTTGGAATATCTCCCCAGGAAGTATCTTC  
AGGCAGACTATTGAAGTCGGCC

>2686

ATTATTAATAAATGATACAATCTCGGGAAAATTTTTTTGATTTTCATGAAATTCATGTGTT  
TTTCTATAGGTAACACAAATTCTGACTGCTATGATATGCCTTTGTTTTGGAACAGTTGTC  
TGCTCTGTACTTGATATT

>2687

AATGAAGATAGGTTTATTGAATGTGCCAGCAAGTGCAGGCCCAGGTCTGAGTGTCTT  
CATTATTATCAGGTGAGAGGAAGCCTGGGAGCAAACACTGCCAGCAGCATAGCTGGGG  
GAACGGGAATTACCATCCTGATCA

>2688

TAAGAAAATAAACTTTTGGGGCGAATACCAATGTGACTCTTTTTGTTTGTCAATTTGTTGC  
TGTTCAATAGGAAATTGTAGTGATGATGCTGTTTCTCACCATTCTGGGACTTGGTAGTG  
CTGTGTCACTCACAATCTGTG

>2689

TCTCTTGAGCGAGACTTCTAGGGATGGGAAATTTGTGGTGATTGATATGAAATGATTTT  
TCCCTTATCAGGTTCCAGAGGATCGTGTTTATGAAGAATTAAACATATATTCAGCTACTT  
ACAGTGAGTTGGAAGACCCAG

>2690

GTGCCCTTCAGTCCCTCCCCAGGCCTCTATCTCCAGACATCCTTAACCCCTCTGTCCC  
TCCCTTTGCAGCCGGATCCAGAGCAATGTAGAAGGCCTATACCTGACTGATGGGGTCCC  
TTTCTCCTGTTGCAACCCCCAC

>2691

CCTGCCTCCAACCCTGGGCCTCTTGGAACCGCTGACTCTCCCTGACTCTTTCCCCTTGC  
TTCCCCACAGGCTCTGGTGCTCCTTGGCCTGCGGTACCTGCAAACAGCACTGGAGGG  
GCTTGGAGGGGTCATTGATGCGG

>2692

GGGCTCGGCGCCGCACTCTTCCCAGAAGGTTGCGCTGGCTCGTGAGTGATCCTGTCCT  
CTCCACCCGCAGGGCCGCGTTTCGCACCAAAACCGTGAAGAAGGCGGCCCGGGTCATC  
ATAGAAAAGTACTACACGCGCCTGG

>2693

CATGTGCTCAGTACCAGGTGGGAGTTGATTTGTCTTCTCACTGTTCTCTTTGGCTGTGT  
GTGCTTTGTAGTTATGTCACGCATCTGATGAAGCGAATTCAGAGAGGCCAGTAAGAG  
GTATCTCCATCAAGCTGCAGGAG

>2694

GTGTTTTCTTCTGGGGTCCACTCACAGATCTCACCAGTAACTGCTCACTGAATCCATTT

TCTCGTTCCAGGACTTCGGCAGTCTGTCCAACCTTCAGGTCACTCAGCCTACAGTTGG  
GATGAATTTCAAAACGCCTCGGG

>2695

CTTTGTAGATGGCTCTACAATTACCTGTATAGATAGTTTCGTAAACTATTTCCCCCTTTT  
AATCCTTAGCTGAACATCTCCTTCCCAGCCACTGGCTGCCAGAACTCATTGAAGTGG  
ACGATGAACGCAAACCTTCGTA

>2696

GTCACAATCCTGTACTGTATAATTTTGGGAATAGAAATAGTAAATGTGTCAATTCATTGTATG  
CTCTTGCAGGGTTATGTGGTCCGAATCAGTGGTGGGAACGACAAACAAGGTTTCCCCA  
TGAAGCAGGGTGTCTTGACCC

>2697

ATTAAACATTCTGATTTAGGATTCTTAAGGAAGTTGTTGAATTAAAATCTCTTCAACTGT  
TTCTTCTAAGGAGAGAAGGATATTCCTGGACTGACTGATACTACAGTGCCTCGCCGCCT  
GGGCCCCAAAAGAGCTAGCAG

>2698

GATGTTTTTAAAGTAGATGTGGATTCTAACAAAACAAATATTGAAATGATTGAGTCCTTT  
GAATTTTTAGGTAAGAAACCTAGGACCAAAGCACCCAAGATTCAGCGTCTTGTTACTC  
CACGTGTCCTGCAGCACAAACG

>2699

TCGACCTGGCTTTGGATTTGCGTCTTTAACCCAGAAAGGCCTTAAGTGTGCTGTTTT  
GTTTTGTTTAGGAGGCTAAGGAGAAGCGCCAGGAACAAATTGCGAAGAGACGCAGAC  
TTTCTCTCTGCGAGCTTCTACTT

>2700

TGACCCAGAGGGATTACGGGATTCAGGGGGTCAAGTGGGCCTCCACTCTGATGTCTCT  
TGCCACTCACAGACCAAGTGCTTCATCTGTGGAATCGGCAGTGACTACTTTGATACGA  
CACCGCATGGCTTCGAGACTCACA

>2701

AATATATATATATATATGTCTCAAGGGTTTGAAGATGTGACCAATGAACTCTTTCTATCCC  
CAATCCTAGGAGTCTTATGTCTGGAAGATGTACCAAGAGAGATGTTGGGATTTCTTCCC  
AGCTGGTGATTGTTTCCGTA

>2702

TCCCCTCTAAGGTGTTGTTGGAGTCTTTATGTTCTCCTGATGTCCCTTCTGCCTTTCCTT  
TCTTTCCAGGGGCTCGGGACATGTGGAGAGCCTACTCTGACATGAGAGAAGCCAATT  
ACATCGGCTCAGACAAATACTT

>2703

AAGAATGGGAGGGTGAGCTGTTGCTCACTGGCCTGATGATTAATCTCCTTCTTGCCTGC  
CTGGACTACAGCAATGCCAGAGAGAATATCCAGAGACTCACAGGCCGTGGTGCGGAG  
GACTCGCTGGCCGATCAGGCTGCC

>2704

GTCCCCGCGTAAGCCAGCCTGGTGCCACCCGGAGCGGCGTTAACGGGTGCGTGGTGT  
CTCGGCTCTGCAGGGCGTCATGGTCGGTATGGGTCAGAAAGATTCCTACGTGGGCGAC  
GAGGCTCAGAGCAAGAGAGGTATCC

>2705

CGGCCGCTAGCGCTGAGCGCCTAGCCTCGGCCTCGCCCCAGCCACTCACTCTCTCCC

GCGCGCGCACAGGCATCGTGCTGGACTCCGGCGACGGCGTCACCCACAACGTGCCCCA  
TTTATGAGGGCTACGCGCTGCCGCA

>2706

GCCCCTGCACCCGGGCGGAGGGCCGCGGCGGCCTGAGTGAGGGCTCCTCTCCTGCTT  
CTGCCCTCCGCAGCTGAGCGCGAGATCGTGCGCGACATCAAGGAGAAGCTGTGCTAC  
GTGGCCCTGGACTTCGAGAACGAGAT

>2707

CTCGCCCCGGCCCCCAGGCCCGCGCCCCCGGCCGAGCTTCTGCTCACGCTCCCCGC  
CGCGGTCCCCAGGTATGGAGTCGGCGGGCATTACGAGACCACCTACAACAGCATCAT  
GAAGTGTGACATCGACATCAGGAA

>2708

TGGCCTGCGCGGGCTGTCGGCGGGGTGGGCTCCAGGGTGAGGTCTCCCCACCTCACG  
CGCTGTCTTGCAGATCATCGCCCCGCCGGAGCGCAAATACTCGGTGTGGATCGGCGGC  
TCCATCCTGGCCTCGCTGTCCACCT

>2709

GGTTGAAGCTGAGATATCTTTTCCCTGCATTTATACTGAAGGTCATTATCTTTCTTTCTTT  
ATCCCGCAGACCTCAGTGGGAAGGTGTTTGTATTTCTTAGAGAATCTGTTACTGATCAT  
GTAAACTTGATCACACCGCT

>2710

AGTGGGGGGTAAGAGTTGTAAGGGAGCTTTGGAGATAATGAATGCATACCTTCTTATTA  
TCAATTACCAGGTGGATCAAAAGGCCGATTACCAAGTGAATTTTCCCAATTTCCACACG  
GACAAAAGGGCCAGCACTATTC

>2711

GGCCAGCTACCATCCCCACCCTTCACTTTTTTACTATACTCACATCACTGATTCTCTTCT  
TTCTCTCTAGGTGTCAGTTGACCTCAGTGAATTCTGTGATGTTTCTGAGATGCAGACTC  
CCGTGTAGTTTCAGATTCTTG

>2712

GGTGGGAGGTAAGAGTTGCAAGAGAGCTTTGGAGATAATGAATGCATACATTTCTATTA  
TCAATTACCAGGTGGATCAAAAGGCCAATTGCCAAGCGGATCTTCCCAATTTCCACATG  
GACAAAAGGGCCAGCACTATTT

>2713

TCCCAGCTCTCCCATCCTCACCCCCACTCTCCACTATCCTCACATATCTGGTTGTCTTTT  
TTCTCCCTAGGTGTCACCCGACCTCAGTGAAGTCTTTGATGTTTCTGAGAGGCAGACTC  
CCATGTGGTCCCAGATCCTTG

>2714

CCTGACAGAGCACAGTGGGGGAAGATGTTGGCAGAGGTGGCAGATGGGCTCACGGCC  
ATCCCTCCAGCAGGAGCAGCGACTGGACCCAGAGCCATGTGGCTGTGCCCTCTGGCCC  
TCAACCTCATCTTGATGGCAGCCTC

>2715

ATCGAGTCTCATTAGCTCCAACCAGTTGTGGGTGACAGATCCTACACATCCATGTCTCT  
TTTCTCTGCAGGCCCCATGGGTCCGCCTGGAGAAACACCATGTCTCCTGGGAATAATG  
GGCTGCCTGGAGCCCCCTGGTGT

>2716

ACGCCTGCGTGGCAGCAAGTGGGAGTCTTCACTGGCCTGCCCCCTCCTTCTGTGTGGGG

CACTCTCCACAGGGCTTCCAGCTCATCTAGATGAGGAGCTCCAAGCCACACTCCACGA  
CTTCAGACATCAAATCCTGCAGAC

>2717

GACCCTAGGTGAGGGAGGTGGCTTAGAGACAAAGTGGTCAGTGGCCTGACCTGGACT  
CCTCTGCTCTCAGCCCTCAGTCTGCAGGGCTCCATAATGACAGTAGGAGAGAAGGTCT  
TCTCCAGCAATGGGCAGTCCATCAC

>2718

CTGGCACGGGTGAAAGCAGAGCTGCTCCCTGACCCTCTGCCCCCTCCCTCCTCCACCCT  
GGCCTGCTTTAGCTTTCCCCAGACATGGCCAACAAGGGTCCTTCCTATGGCATGAGCCG  
CGAAGTGCAGTCCAAAATCGAGA

>2719

CCACCCTGTGAGTCCTGGGCCAATCCCTGAGCTGACTGCTAAGCTGCGTCCTATGCCCT  
ATGCCTGGTAGATTCTGAGCAAGCTGGTGAACAGCCTGTACCCTGATGGCTCCAAGCC  
GGTGAAGGTGCCCCGAGAACCCAC

>2720

GGCAGGCCCTGGCTTGGAGTCTTGTTTATACGTTCTTGATGTTTCATCTCCTCTCTCCTGT  
CTTCTCACAGGCAAAGACATGGCAGCAGTGCAGAGGACCCTGATGGCTTTGGGCAGC  
TTGGCAGTGACCAAGAATGATGG

>2721

AGAGGGATCAGAAAACGGGTGGAAAACACACAGTTCTACCAAGTCTTTATCCTGGTTC  
CTCCTCTTCTAGGAAAGCGCAGGAGCATAAGAGGGAATTCACAGAGAGCCAGCTGCA  
GGAGGGAAAGCATGTCATTGGCCTT

>2722

GGTGGCCAGGGGTGGCCTGGTTCCTCTGCTCTGCCTCTGATTTCTCACCATGCGCTCC  
TCCCACTGCAGAAGGAACCCAATGTGGCTCGCGTGGGCTCCGTGGCCATCAAGCTGTG  
CAATCTGCTGAAGATAGCACCAC

>2723

ACCCAAATGCCCAGCACAGGAGGACCAGGATTGGAACAAGTGTTGACCTCTCATGTTT  
ACTTTGTTTCAGAATTGGGGGGTTCTATGCTCTTTCCCCATACCCCGGTCTCCGCCTCAT  
CTCTCTCAATATGAATTTTGT

>2724

CCCCTTTCTCTAGCCAGGGCTGCCTGGACCCCTGGATGCCCTGATTACCATCCTTAATTC  
TCCCTACTAGGTGCATATAATTGGCCACATTCCCCCAGGGCACTGTCTGAAGAGCTGGA  
GCTGGAATTATTACCGAATTG

>2725

GGCATCCTATCTCCCCAGATGTCTTCCTACCCCTCCCTAGAATCTTCTGAATGTAGTACC  
TTCTGGCCAGGTATGAGAACACCCTGGCTGCTCAGTTCTTTGGCCACACTCATGTGGAT  
GAATTTGAGGTCTTCTATGAT

>2726

CAGGATGTGTGGCCCCCTCCCTGGAGTTACCCTTGCTCCTTGCCCCCTCCAGTCAGCCCCA  
CATCCTTGCAAGTTACCGTGTGTACCAAATAGATGGAACTACTCCGGGAGCTCTCACG  
TGGTCCTGGACCATGAGACCTA

>2727

AGGTCGCTGGCTATTGGTGTGGTGTGTGGTGAGGCTGCTAGTGAGTCACCTGTGACCA



CTCTTGTTTCAGGATGATAAGGATGCCTTCTATGTGGCAGACCTGGGAGACATTCTAAA  
GAAACATCTGAGGTGGTTAAAAG

>2728

CCCATGCTTTTCTGTTTATTCCACGTGTTAAGCCACATATGGATAGCATGACACCACTCT  
TCTTTTTCAGACTGAAATACAGTTGGTGCAGAGTCTGGGGGTGCCTCCAGAGAGGATT  
ATCTATGCAAATCCTTGTAAC

>2729

TTTTTATTTTAATTGTGGCTATAAGTGAACATCTATCATGAGACATTTGCTGCACTTTTCCT  
TGCTTGTAAGTTGGTTTTGCGGATTGCCACTGATGATTCCAAAGCAGTCTGTCGTCTCA  
GTGTGAAATTCGGTGCCACG

>2730

TTCTCCTAGTGTGTTGCTATTATTTTAAGAAATACTAAGACACAGTGTCTCGTCTCTTTATT  
TTACCCAGCTTCCATGTAGGAAGCGGCTGTACCGATCCTGAGACCTTCGTGCAGGCA  
ATCTCTGATGCCCCGCTGTGTT

>2731

TTCAGCCTATCTGCTGCATACATTTTTGTTATTAGCTGTGGATCTGGCTGACTTATTTTCT  
TGATTCTAGGCTGAGGTTGGTTTCAGCATGTATCTGCTTGATATTGGCGGTGGCTTTTCCT  
GGATCTGAGGATGTGAAAC

>2732

GTGATGTTACTCCCCCATGTGAATTTCCCACAATGAAGGCTGCTCTTTCTTTTCTGTTTC  
ACTCTCTTAGATCACCGGCGTAATCAACCCAGCGTTGGACAAATACTTTCCGTCAGACT  
CTGGAGTGAGAATCATAGCTG

>2733

GACGAATCACTTCATGTATAACTGAAAGCTGATGCAAAAAGTCATTAAGATTGTTGATC  
TGCCTTTCTAGACGAAGATGAGTCGAGTGAGCAGACCTTTATGTATTATGTGAATGATG  
GCGTCTATGGATCATTTAATTG

>2734

AAACAATTAAGAGGACTGGTCACAACACGTGTAATTAAGTAGTACTTCCTCTCTCCGTC  
TCTTTATATAGAGACCTAAACCAGATGAGAAGTATTATTCATCCAGCATATGGGGACCAA  
CATGTGATGGCCTCGATCGGA

>2735

GGAAGTAAATACTCTCATGCCCAGTTAGGAGTGAGTCAGGGTTTTTAATATGCCACTTT  
TTCTTTCTCAGGCAACTCATGCAGCAATTCCAGAACCCCGACTTCCCACCCGAAGTAG  
AGGAACAGGATGCCAGCACCTG

>2736

GTGGGTGAAATCATGATGCCAGGTGTGTAGCCTGGATCCTGATTAAGGTTGCTCTGGCC  
CCAAACCACAGCTGCCTGGACCACCTCATCCTTGGCCTGTGCCCAGGGCCCTGAGTTC  
TGGTGCCAAAGCCTGGAGCAAGC

>2737

AACCTCCCCATTGGAGCTGGGAGCCTCCCCCACTCATGTGTCCTCCACCTTGGGGCCC  
CTCCCTCCCCAGGATGACCTATGCCAAGAGTGTGAGGACATCGTCCACATCCTTAACA  
AGATGGCCAAGGAGGCCATTTTCC

>2738

CTTGTGTCCAGGGACTTGGGCGGGGTAGACCTCAGAGAGGCCAGCTGACGGCCCCC

TCTGGCCTCCCAGGACACGATGAGGAAGTTCCTGGAGCAGGAGTGCAACGTCCTCCC  
CTTGAAGCTGCTCATGCCCCAGTGCA

>2739

TTGGGCCGGCCTGAATAGGGGTGGGCTTCCCTCCCAGACCCTAACACTCCCACCCTGT  
GCTGTGCCCCAGGACTCAAACGGCATCTGTATGCACCTGGGCCTGTGCAAATCCCGGC  
AGCCAGAGCCAGAGCAGGAGCCAG

>2740

AGAGGGGAGGAGAGCCTGGAGGACTCTTCTCCCAGCACCCAGCCTGGCCTCCACCTG  
ATTCTTTCCCCAGGATCTCTCCGAGCAGCAATTCCCCATTCCTCTCCCCTATTGCTGGCT  
CTGCAGGGCTCTGATCAAGCGGA

>2741

GGTGCTGGGCAGAGAGTGGAGGCTTGCCAAGTGAAGGTCCCATGCTGGCCTCTCTCC  
GCCCCCGCCCCAGGGTGCCTACGTGTGGCAGTGGCCCAGGTGTGCCGCGTGGTACCT  
CTGGTGGCGGGCGGCATCTGCCAGT

>2742

AGGAGGACAGAAACCAAACACCTCTGTAGGGTGGCCTTGCCTGCTTTCCCCCTAATGC  
TCACATCTCCAGGGTCGCCGACAGGAGAATGGCTGCCGCGAGACTCTGAGTGCCACCT  
CTGCATGTCCGTGACCACCCAGGC

>2743

TGGAGAGGGCCCAGGACCACACGACAGGAGAGTCCTGCAAAGGGACCTCCACAGCTG  
TGTGTCTCCCTCAGTGCAAGCAATTTGTGGAGCAGCACACGCCCCAGCTGCTGACCCT  
GGTGCCCAGGGGCTGGGATGCCCACA

>2744

TTCCCGGAAGAGCTGGGTGTGGGGAGCTGAGGGGGGCCAGGCCTCAGCCCTGGTGCT  
GTCCCTGTGACAGGCCCTCGGGGTGTGTGGGACCATGTCCAGCCCTCTCCAGTGTATC  
CACAGCCCCGACCTTTGATGAGAAC

>2745

GCTATCACCTGGCTGTGGGTCCCCAGGCAGGACATACACACAGTCCCTCTCTGGCCCT  
CATCCTCCTCAGCTGCAAAGGAAAAGCCAAGTGAGACGGGCTCTGGGACCATGGTGA  
CCAGGCTCTTCCCCTGCTCCCTGGC

>2746

CCAGGGCGGCTTGGGGTACGTTTTTCCCCACCCCAGAGAACCCAGGTCCCCGACTGTCA  
CTCCGCCCCGAGTAAGACCTATGGCAACGTGCTGGTGTGGACGGTGTATCCAGTGC  
ACGGAGAGAGACGAGTTCTCCTAC

>2747

GGTCTGCTTCAGGGGCCTGGGGGCTCCCAGTCCTGCCAGGGCCCCTGCCTTGACTGCC  
CCCTCCTCCCAGGTGCTGATCATCGGGGGCGGAGATGGAGGTGTCCTGCGGGAGGTGG  
TGAAGCACCCCTCCGTGGAGTCCG

>2748

CCCACGTGGCTGTGCTGGCTCCAGGTCCCCCAGCCCCCTTGGCCCAGACTGGTCCCTCC  
CATCCCCTCCAGGATGTCATCCAAGTCTCCAAGAAGTTCCTGCCAGGCATGGCCATTGG  
CTACTCTAGCTCGAAGCTGACCC

>2749

CTGTGTGGGTGACAGTGGCCCTGGAGGTCACAGCCAGACTGTTCAAGTGTGTCTCCCTC

TGTCCTCCCCAGGCCCCGCCGAAAGTCTCTTCAAGGAGTCCTATTACCAGCTCATGAA  
GACAGCCCTCAAGGAAGATGGTGT

>2750

TGGAGCACTGGGGCGGGGCGGGGTGGGGCAGGGCAGGCCCTGCCGGATGCTGATGCT  
TAGGGGCCCCCAGGCGAGTGCCAGTGGCTGCACCTGGACCTCATCAAGGAGATGCGG  
CAGTTCTGCCAGTCCCTGTTCCCCGT

>2751

ACAGTGAGACTCCGTCTCAAAAAAAAAAAAAAAAAAGTGCCCCCCTGATGTGCCCTG  
GCCCCGTCCCCAGAGCACGAACCTTCCAGGAGCCGGTGCAGCCGCTGACACAGCAGCA  
GGTGGCGCAGATGCAGCTGAAGTACT

>2752

GGCCTGCGGGGCTGGGTGGTGGGACCCAGGGACCCAGAGCGCCCTCCTGACTGGCCT  
CATGTCCCTCCAGGCACTGAATGATGTGAGCTGAGCCCAGGCGCCACCACTGATGCCA  
CCCAGGACCTCGGACCTTGGAGCCT

>2753

TGTCGTCTTAAGCCTTCTCTCCTGACTGCAGCCATCCCCAGCTACTTTATCTTCCAGTCT  
TTCCTTTCAGAGGAGATCATCGGGGGCCATGAGGCCAAGCCCCACTCCCGCCCCCTACA  
TGGCCTTTGTTCAGTTTCTGCA

>2754

CTGCTCTTCACTGCTCCTGGGCTCTATCCCCTGTGACTCCACCCCCATCCTCACTCTGCT  
CTCTGTGCAGCTCCATAAATGTCACCTTGGGGGGCCACAATATCAAGGAACAGGAGCG  
GACCCAGCAGTTTATCCCTGTG

>2755

AGCCCCATCACTGTGTGCGGGGCCCAGAAGGCCATTGCCTGACCTGGACTTTCTTGCTT  
CTTCCCCACCAGCTGGAGAGAAAGGCCAAGTGGACCACAGCTGTGCGGCCTCTCAGG  
CTACCTAGCAGCAAGGCCCAGGTGA

>2756

CACAAAATCCATAACAGAGACCACCCATCCCAGGGAACACTAGCTCAGTCTTTCCTCT  
CTCTGTTCACAGGGGGACTCCGGGGGGCCCCCTCGTGTGTAAGGACGTAGCCCAAGGTA  
TTCTCTCCTATGGAAACAAAAAAG

>2757

TTACTGCAACTATTCACTGAATCTTGTGTGGGCTTTTACTCTGTCTTTCTCTTCTCTTT  
GTCCTCCAGGAAATCCACAAGGACCATCCCCACAAGGAGGCAACAAGCCCCAAGGTC  
CCCCACCTCCTCCAGGAAAGCC

>2758

ATTAGAAGTGGTATTCACCATGGCTTCTTCCCTATTATTCTCTGCTTAAATCATTCTTTTC  
TTTTTCCAGGACCAGCCACTGTTGCAGCATGAGTTCCCAGCAGCAGAAGCAGCCCTGC  
ATCCCACCCCCTCAGCTTCAG

>2759

AATCTGTTTGGCATTGAATTTGTATCCATCTTTCTTTAATTGAATCACTGTGTCAGCTTTC  
TGTCTCTAGAAAAAACACATTTGAAGCATGAATTCTCAGCAGCAGAAGCAGCCTTGC  
ACCCACCCCCTCAGCCTCAG

>2760

CGCGACCTCCCCGCTGCCCTCCCCGCGCGCCTTCCCCGGCCCGCGGCCTGACCCGCC

GTGTCCGGCCAGGATCAACTCGTAGGCTTTACGAGAAGAAGATCTTCGAGTACGAGAC  
CCAGAGGCGGCGGCTCTCGCCCCC

>2761

GAGAGCGGCACTGGAGAAAGGGGAGGGAAGTCTGGGGGGCAAACAGTTCTGTCTCC  
TCCTTTCAATCCAGACTTGAATTCGACTAGAGGGGATGCAGATATGTATGATCTTCCCA  
AGAAAGAGGACGCTTTACTCTACCA

>2762

TTCAGATTAGGCCATCAGGCCAGGCGGGCACACCGATGCCCCCTCTCTGACCGCTGCC  
CCCCTTCCCAAGGCTACAATGACGACTACTATGAAGAGAGCTACTTCACCACCAGGAC  
TTATGGGGAGCCCCGAGTCTGCCGG

>2763

GGGGGAGCCCAGGGACGGGCTGGTTCTGGGTCCAGGCTCCTGGCCCACTTGCTCCCC  
TCTTTTGCCTCAGGGAACGCCCCATGTACGGCCGGGACAGTGCCTACCAGAGCATCAC  
GCACTACCGCCCTGTTTCAGCCTCC

>2764

TCTGTTCACCCTGCCAGGCAGTCTCTTCCTAGAACTTGGTTAAATGTTCACTCTTCTT  
GCTACTTTTACGGATAGATTCCCTCACCTTGGCCCCGCTTTGCCCCACCCTACTCTGCCC  
AGAAGTGCAAGAGCCTAAGCCG

>2765

TGTCTCTGGCTCAGGGAGTGTTTCATCCAACTAAGCTCCCTCAGTGGTTGTCTCACTTC  
ATCTCTTATAGATTAAGTTCCCTTCCAAAATGTCACCATTCCCTGTATCTGGTTCTCTTGGTA  
CTTGGGCTTCATGCTACAAT

>2766

TAATGGAAAAGGTCTTGTTGGTACTGATACCGGTTTAAAATAAACACCTCTCTTTTCTTT  
GTATTTTAAGCCCAGTGGGCAAATCCTTTTGATCCATCCAAGACAGAAGACAGTTCCA  
GCTTCTTAATAGACAAGACCAC

>2767

AGAGAGAGAAGGAGAGAATCATAAGCTTGATATGGTGATTGCCATGTGTTCCCTTCCTC  
TTTTCCACAGATGGGTTGACTTGTTTGTTCCAAAGTTTCCATTTCTGCCACATATGAC  
CTTGAGCCACACTTTTGAAG

>2768

TACTTCTAGACCTTCCCAAAGACTGTTCCCTGTTTCTTCAGAGACCCGCAGGATTGTTC  
TCCCCACACAGGCTGCCCATAAGGCTGTGCTGCACATTGGTGAAAAGGGAAGTGAAG  
CTGCAGCTGTCCCTGAAGTTGAAC

>2769

GTGTGTGTGTGTGTGTGTGTGATGAGTACAAGTGTTCCTCATCCTGTTCTCAACTTG  
TGTCTCCGCAGATCACACAGGTGCTGGAGTCTCCAGACCCCCAGTAACAAGGTCACA  
GAGAAGGGAAAAGATGTAGAGCT

>2770

TGTTTCTTTTGATCACTCTCAATTTTATGTGGCCTAAAATACAGACTCCATGAATTGATT  
GTCGTTAAGGGCTGGGCCATCAGGAATTTGCTCGTCCATCTCGGGGATACCTGGCCTTC  
AGAGATGACAGCATTTGGCC

>2771

TTCGCTTACAGGAATTGCCCTTGCACTTTTCCATCCCTACACCTCAGTCATTCTGTTCTT

ACCTTTCAAGGTAAGGAGCTAAACAGAACCTGCTGCCTGAATGGGGGAACCTGCATGC  
TGGGGTCCTTTTGTGCCTGCCC

>2772

TGGAGAGGAGAGAGAAAGGGAAGTGGAATTTTCAGACCCAAGCTATCGCAGCTTACC  
TGTTCATTCTCAGGAACCTGTGGGTCTGTGCCCCATGACACCTGGCTGCCCAAGAAGTG  
TTCCCTGTGTAAATGCTGGCACGGT

>2773

CACATTTGTGGGCAGCAGGATGAACTGCCAGAGAGGTTTGCTTTAATGACCAAGCATC  
CCTACCTTCCAGATGGCCTTGTGATGGATGAGCACCTCGTGGCTTCCAGGACTCCAGA  
ACTACCACCGTCTGCACGTACTAC

>2774

GTTTTATACATCAATACATTTCGAGTGCTCTGAAGTGCATGTAATAATAGCTGTTTCTCTG  
TTGTTTAAAGGCACTACAAATACTGTGGCAGCATATAATTTAACTTGGAAATCAACTAAT  
TTCAAGACAATTTTGGAGTG

>2775

AAGCAGTCTATCTTGTGGGTGCAAATTGTAACATTCCATTTATGTTTCTTCCTTCTTTTC  
TTTCTTTAGCACTAAGTCAGGAGATTGGAAAAGCAAATGCTTTTACACAACAGACACA  
GAGTGTGACCTCACCGACGAG

>2776

GATAACAAAACAGGATTTGACTTTGTACAGAATTCTTTGGTTCCAACCAAGCTCATTTTC  
CTTTGTTTCAGCAAACCTCGGACAGCCAACAATTCAGAGTTTTGAACAGGTGGGAACA  
AAAGTGAATGTGACCGTAGAAGA

>2777

ACAGTGACTTAATAAAGGGGAAAGAATTGACTCAGAGCCCAGATGAATTAAGAACTCT  
ATCTTTTACAGAAAACAGCCAAAACAAACACTAATGAGTTTTTGATTGATGTGGATAA  
AGGAGAAAACACTACTGTTTCAGTG

>2778

CCGTCAATTTTGTCCACTGATAAATGGGATTTGAGCTCTCCAAGTTGACTAGATGCCCT  
TTATTTTTCAGAAATATTCTACATCATTGGAGCTGTGGTATTTGTGGTCATCATCCTTGTC  
ATCATCCTGGCTATATCTCT

>2779

ATGCCCCCAGATGGCCAAGACTGCCTGTTTCCTGAGGTCGCTGTTCCATGACCCCCCA  
CCGCCTTTACAGTGTTTCCTGGCTCCTCAGCAAGCACGGTCGCTGCTCCAGCGGGTCCG  
GCGAGCCAACACCTTCTTGAGGA

>2780

AGACAACTTTGCAGGGAGAGAGGAAATAAGTCCCCAGGCTCCAAGGCTGACCGGGGT  
GGGGTCTCCGCAGGTAACCTGTGCTGAGGGTCTGGGTACGAACTACCGAGGGCATGTGA  
ACATCACCCGGTCAGGCATTGAGTG

>2781

ATGGGCTGAGAACAGGGAGCAAGCGTACCTCAAGTTCAACAGCCTCCTGTTGGGCAA  
TTTCCTCTTCCAGAATCAACTCCACTACCCATCCTGGGGCCGACCTACAGGAGAATTTTC  
TGCCGCAACCCCGACAGCAGCACC

>2782

ACACCCCTGTCTGTTCCGGTCCATGTGTGGTCTCACTCACTCTGCTGCCTCCTTGCCCC

TCACCCACCAGGCCAGGATCAAGTCACTGTAGCGATGACTCCACGCTCCGAAGGCTCC  
AGTGTGAATCTGTCACCTCCATT

>2783

ACTGGGGGGATCTAGGGGATGGGTGAGGAATGGCCCAGCCCAGTCCCGGCCGGTGCC  
TGGGTCCCAACAGAGGAGGCCGTGGAGGAGGAGACAGGAGATGGGCTGGATGAGGA  
CTCAGACAGGGCCATCGAAGGGCGTAC

>2784

ATCCGAGGGGATGCGGGGCTGCGGGGCTGGTGGCCAGGACTTGCCCCTCACTGCTTG  
GCTTGCTCTGCAGACTGTGGGCTGCGACCTCTGTTCGAGAAGAAGTCGCTGGAGGAC  
AAAACCGAAAGAGAGCTCCTGGAATC

>2785

TACTTCTAGGGCTGGTGTAGAGGCAGCCCCCTCATCCTCAGCTCCTAATGCTTCCTGCT  
GCCCCCTCCAGGCAGGTGATGCTTTTCCGGAAGAGTCCCCAGGAGCTGCTGTGTGGGG  
CCAGCCTCATCAGTGACCGCTGG

>2786

GGCAGGCAGTTTCCTGCTCCTTGCTGGGTGAACCTGCAGCTTCTCCATTTCTTTCTTGG  
GGTCTCTGCAGGTACGAGCGAAACATTGAAAAGATATCCATGTTGGAAAAGATCTACA  
TCCACCCCAGGTACAACCTGGCGG

>2787

GAAATGGCGTTGGGGCCAGGCGGCTCCTGTGGGGGTTGGCTCTCACTAGGCCCTTCTT  
CCTTCCCCAAAGCTTGCTCCAGGCTGGATACAAGGGGCGGGTGACAGGCTGGGGCAA  
CCTGAAGGAGACGTGGACAGCCAAC

>2788

GTGTCTCGTGAAGGGGCGTGGCTGGGCTATGAGCTATGCTCCTGAGCACAGACGGCTG  
TTCTCTTTCAAGGTTACAAGCCTGATGAAGGGAAACGAGGGGATGCCTGTGAAGGTGA  
CAGTGGGGGACCCTTTGTCATGAA

>2789

TTGCCTGGCAGAGGAATACTGATGTGACCTTGAACCTTGA CTCTATTGGAAACCTCATCT  
TTCTTCTTCAGAGCCCCTTTAACAACCGCTGGTATCAAATGGGCATCGTCTCATGGGGT  
GAAGGCTGTGACCGGGATGGGA

>2790

TCTGTTACCCCTGCCAGGCAGTCTCTTCCTAGAACTTGGTTAAATGTTCACTCTTCTT  
GCTACTTTCAAGATAGATTCTTCACCCTTGGTCCGCCTTTGCCCCACCCTACTCTGCCCA  
GAAGTGCAAGAGCCTAAGCCG

>2791

GGGAATTCCTGGAATACCAGCTGACAATGATTTCTCCTCATCTTTCAACCTCACCTCT  
CCTCATCTAAGAATTGCTCCTCGTGGTCATGCTTCTCCTAACTGCAAGGCTAACGCTGT  
CCAGCCCGGCTCCTCCTGCTTG

>2792

CCTGCTTATTAGGCTACCATAGCTCTCTCTATTTCACTCCCTTCTCCCCCACCAATCTT  
TTTCAACAGAGCCAGTGCCCAGAGGTTACCCCTTTGCCTACACCTGTCCTGCTGCCTG  
CTGTGGACTTTAGCTTGGGAG

>2793

CTAAGGCTCCCCACCCGCTTTTAGTGTGCCCTTTGAGGCAGTGCGCTTCTCTCTTCCAT

CTCTTTCTCAGGAGGAGACCAAGGCACAGGACATTCTGGGAGCAGTGACCCTTCTGCT  
GGAGGGAGTGATGGCAGCACGGG

>2794

TCCTACTTAGACAAGGGAGGCCTGAGATCTGGCCCTGGTGTTTGGCCTCAGGACCATC  
CTCTGCCCTCAGCTTCCTCCACAGGGCAGGACCACAGCTCACAAGGATCCCAATGCCA  
TCTTCCTGAGCTTCCAACACCTGC

>2795

CACTTCAGGTGGGTGGGAGGCCCCCTGTGCCGCAGGCCCCCTCCAGTTTGAAGGAGGCA  
CTGCTGGTGCCAGTCTTGCAGGTCTCCCGAGGGCAGAAGGTGACCAGCCTAACGGCC  
TGCCTAGTGACCAGAGCCTTCGTCT

>2796

GCCTGTGCCTGCCTGAGTCCTGATCCGTCTTCCTTCTACCCTGCCCCCGGCCCCCTTC  
TCTTTCTGCAGACAACTGGTCAAGTGTGAGGGCATCAGCCTGCTGGCTCAGAACACC  
TCGTGGCTGCTGCTGCTCCTGCT

>2797

TGTTGGGGAGGGGTCTCCTTCTCCCACTCCTCCCGCCGTGGACCTCACCTGACCCTCT  
CTCCTCTTGCAGCACAGAGTTGATGAGACGCGTCCGTCGTTCCAGATTGCTCAGTAC  
AAGTGCCTGGTGATCAAGTATGCC

>2798

ATTCCTGGCCCCCTGCATTGTGGCTTCTGGCCTCCCTGGCCCTGCTCACGCTCTGGCTT  
TCTCTTCCAGGAACACCATGGAGGCGCTGCCCCCTGCCTGCTCCGAGACGTGGCCC  
AGGAGGCCCTGGGCGTGGCTGTC

>2799

TCGCTGGGGCTCCAGGGAGCTGCTGCTGGGGTGGAAGCTCTCACACTCTTTCTCCACG  
TGCCCTTTCCAGTTCCTGACATCATGGAGTTCTGCGAGGCCATGGCCAACGCCGGGA  
AGACCGTAATTGTGGCTGCACTGG

>2800

TCAGAGGGTTTAAAAGAAAAACCCACCTGGTAAGGTGCTGAGCGCCCTCTGTCTTTCC  
ATGGGAGCACAGCCATTTGGGGCCATCCTGAACCTGGTGCCGCTGGCCGAGAGCGTG  
GTGAAGCTGACGGCGGTGTGCATGG

>2801

GCGGGGTGGGGGTATGGCTCTGCCTCCTTCCTGTCCTGGCCCTTCACCCATCCCCTGTC  
CCTGCGGCCAGGTTCGAGGTGATTGGGGGAGCAGACAAGTACCACTCCGTGTGTGGC  
TCTGCTACTTCAAGAAGGCCTCAG

>2802

GTTGGGGGGGGGTAGGTGTGAGGCTGACAGTCCAGCAGGCCTCACCTCTGCCCTCTG  
CCCTCCCTCGCAGAGTTCAAGGCTGCCTTTGACATGTTTGATGCTGATGGTGGTGGGG  
ACATCAGCGTCAAGGAGTTGGGCAC

>2803

GAGGCAGGGGATGGTGGGGAGAGGCGGCAGCGGCTGGGCTCAGGCTCAGTCTGCCA  
CCTGCTGCCCCGAGGCAGCGGCACCATCGACTTCGAGGAGTTCTTGGTCATGATGGTG  
CGCCAGATGAAAGAGGACGCGAAAGG

>2804

GGGCGTCGAGTGTGGTGGCCAGGGCAGCTCGCCCCGGCCCTGAGCCCTGCCCTGTCC

CTCGGACCCGAAGGAATGCAGACGGCTACATCGACCCGGAGGAGCTGGCTGAGATTTT  
CAGGGCCTCCGGGGAGCACGTGACG

>2805

GGCTGGAGCCCTGGCCTGGCCTCTGCGTCCCCAGTGGGACCCCTGACCCTCTCCCTCT  
CCTTTCCCTCAGAGTTCCTGAAGATGATGGAGGGCGTGCAGTAAGGAGTGGACAGTCG  
CCTCTACCAAGATCGCGTGTCCCT

>2806

ATGGGGGCTGCTGGGGTGGCTCAGCCAAACCTTGAGCCCTAGAGCCCCCTCAACTCT  
GTTCTCCCCTAGGGGCTCCCTGGTGTGGCCTCACACCTTCAGCTGCCCAGACTGCCC  
GTCAGCACCCCAAGATGCATCTTG

>2807

TTCCTCAGGGATTGAGACCTCTGATCCAGACCCCTGATCTCCCACCCCCATCCCCTATG  
GCTCTTCTAGGAGACCCAGCAAGCAGAACTCACTGCTCTGGAGAGCAAACACGGA  
CCGTGCCTTCCTCCAGGATGGTTT

>2808

AGGGCCAGGATGTGGAGAGTGAACCGACATGGCCACACTGACTCTCCTCTCCCTCTCT  
CCCTCCCTCCAGCAAACCCCTCAAGCTGAGGGGCGAGCTCCAGTGGCTGAACCGCCGGG  
CCAATGCCCTCCTGGCCAATGGCGT

>2809

GGTCAAGGAGGTCAGTACTTCATGAAGTGCTCAGCTATTAAAGGTTCCCTTTCCCACTC  
TTATCCCTTAGGATGGAAATCCAATAATGAGACCGCACTCCTTGGCTTGTTCTGCGT  
GTTTCACCCAAAGGAGAAAATG

>2810

CTTATCCTCCTCTGTTGCCATCATGGACCTCTCGCACCCCGTGATCAAGCTGTTTTTTCT  
CTCCTTCCAGAATTTAAGGGACGCTGTGAAGCAATCATGGATGCAATGAAGAGAGGGC  
TCTGCTGTGTGCTGCTGCTGTG

>2811

AGGTGCAAGGGTAGTGAGGCATTTTCATTTTGAGTCATACTCTGATGAGGCTGGCCTGTC  
TTTTCTCATAGTGATCTGCAGAGATGAAAAACGCAGATGATATACCAGCAACATCAGT  
CATGGCTGCGCCCTGTGCTCAG

>2812

CTCCTGGAACCATGGCCTGAGCACACAGAAGGAGGCTGTCATTAGGGGCTTCCTTTTT  
TATACTTGACAGGTTGCAGCGAGCCAAGGTGTTTCAACGGGGGCACCTGCCAGCAGG  
CCCTGTACTTCTCAGATTTTCGTGTG

>2813

AGGGGAGCCTCCTGAGGGCTGAATGAAAGGGGACTCCCATGTGAGGCATCCATGCCCT  
GCTCTCTGTCAGATACCAGGGCCACGTGCTACGAGGACCAGGGCATCAGCTACAGGGG  
CACGTGGAGCACAGCGGAGAGTGG

>2814

AGTCCTTGGGTCTTAAAGGAGAGGCTTCACCTTTGACCTACCCTGGCCCTTCCCTTGG  
CTGATTTTTTCAGAAACCCAGATCGAGACTCAAAGCCCTGGTGCTACGTCTTTAAGGCG  
GGGAAGTACAGCTCAGAGTTCTGC

>2815

CAAGCCCCAGCCCTGACTTGCGTGCTTCAGAATTTGTTTTTGTTCAGTTTGAGAATTC



TTTTCTTCTAGGAAACAGTGACTGCTACTTTGGGAATGGGTCAGCCTACCGTGGCACG  
CACAGCCTCACCGAGTCGGGTGC

>2816

AGACCCCATCTCTACAAAAATTAAAAAATAAGAAGATAAAAAGGAAACCTTAAACTCT  
CTTATCATTTAGGAATCCTGATGGGGATGCCAAGCCCTGGTGCCACGTGCTGAAGAACC  
GCAGGCTGACGTGGGAGTACTGT

>2817

CTCCTCACTCTACCTACACACGTGCAGGAGGCCTGTGGGACTGACTGCCTCCTCGTCC  
TTTCCTCCCCAGCCACCTGCGGCCTGAGACAGTACAGCCAGCCTCAGTTTCGCATCAA  
AGGAGGGCTCTTCGCCGACATCGC

>2818

GCCTAGAAACCAAGCCCTTTAGGGGAAATCCCACAGCAAAAAAAGCATTCTAAGGCT  
GTTTCTCCACCAGGTTTCCGCCCCACCACCTGACGGTGATCTTGGGCAGAACATACCG  
GGTGGTCCCTGGCGAGGAGGAGCAG

>2819

CTCCTGCGTGTTCTTCCCCTCCCGGGGACGCGGCCCTCACGCCAGCTCACTCCTCCTTT  
CTCCCTCCCAGCGCTGCTGCAGCTGAAATCGGATTCGTCCCGCTGTGCCAGGAGAGC  
AGCGTGGTCCGCACTGTGTGCCT

>2820

TTGGCTTTCTCTTTCAAAAACGTTTATAAATAACTTTCCCTAAAACCATATGATGGTTCT  
CCCCTTTCAGTGTCTCCTTTCTATTTCGGAGCGGCTGAAGGAGGCTCATGTCAGACTGTA  
CCCATCCAGCCGCTGCACATC

>2821

CTACACATACTGACTTTCTCCAGATAGTCTGCTTTTTTTTGCAAACGCCAAACCTGCTATC  
TCCTTTGCAGGGCGATTTCGGGAGGCCCCCTGGTGTGTCTGAACGATGGCCGCATGACT  
TTGGTGGGCATCATCAGCTGGG

>2822

GCTGCAGGCCAGGGAAGGGGGAGGCTCTGGAGCAGTCGGCCTGAGCCTGATAGAGAG  
GGGCCTTCTCCAGGTGTCAGGGACGTGGTATCTGAAGGCCATGACGGTGGACAGGGA  
GTTCCCTGAGATGAATCTGGAATCGG

>2823

CAGCATGGTTGCTCCAGGGCCGGGGGAGGCACAGCCAGGGCCGCTTTGCCAGGGGGC  
TTCTGTTTTCCAGGATAAGTGGCCGGTGCCAGGAGGTGAAGGCCGTCTGGAGAAAA  
CTGACGAGCCGGGAAAATACACGGCC

>2824

CACGCTGTCCCGGGATCCTCTCTGAAGTCCCTGGTGGCTAATTCAGGAATGTGCTGCTG  
TCTTTCTGCAGACGGGGGCAAGCACGTGGCATAACATCATCAGGTCGCACGTGAAGGAC  
CACTACATCTTTTACTGTGAGGG

>2825

TCCAGACTGGGATGGGGTGCCGTCGGCCAGTGCTGCCTCGAGCACCCACATCTCGTCC  
TGGCACCCACAGGCAGAGACCCCAAGAACAACCTGGAAGCCTTGGAGGACTTTGAGA  
AAGCCGCAGGAGCCCGCGGACTCAG

>2826

CCCCACATTGCATCCCCCTCCCACCCTTGCTGTCCTGGCCTCACTCACCCCTCCCCCCT

TTCCAGGGCAGGGGACACCTTGGCTCCTCAGCAGCCCAAGGACGGCACCATCCAGCA  
CCTCCGTCATTCACAGGGACATGG

>2827

ATAGTGTGAATGAAGCCTTCCCAAAAGCAGAAACGGGATTTTGATTCTGGATCTTATTT  
TATTGTTCTAGGTTTACTTGAACCTTGAAGGAAAGAAAAAAAAAATGTCTCCACTTCTGA  
GAAGCATCTGTGACATCACTGAA

>2828

CATGTGTGAATATAATTTTACCACCTGTAAATAGTGCATTGTAAAATTTTGTTTTTTCACC  
ATTTTATAGAGACCACATGACCCTAAGACGGTAGATCTGATCCTGGAACCTTCTGGATCG  
TGACAGTAATGGGCGTGTCTG

>2829

CAGGGTTCTGGCCCTCCGTGGTCTGCTGAGCCCTGACTACCGTGCCCCCAAC  
CCCTGAACACAGAGTTCAAGGCAGCCTTCGACATCTTCGTGCTGGGCGCTGAGGATGG  
CTGCATCAGCACCAAGGAGCTGGG

>2830

GGTTCGTGTCGAAGGTGCTGCCTGCAGTACCTACCCTGGCCTCTGTAAACGGCCATGCT  
GCCCCCCCCAGGCAGCGGCACGGTGGACTTTGATGAGTTCCTGGTCATGATGGTTCG  
GTGCATGAAGGACGACAGCAAAGG

>2831

GCCTCCTGGGGCATGGGTGGGGCTGCCTCATGCCCTCCCCACAGCCCTACCCTGAGCC  
CCCTCCCCACAGAAATGCTGATGGCTACATCGACCTGGATGAGCTGAAGATAATGCTGC  
AGGCTACAGGCGAGACCATCACG

>2832

GGGCTGATCTCCTGCCTCCATGCCCTGCCCAGCCCCTACCCTCAACCCACACCTGCCCC  
TCTTTCCACAGAGTTCCTGGAGTTCATGAAGGGTGTGGAGTAGATGCTGACCTTCACC  
CAGAGCTGCCTATGCCCAGCCTC

>2833

CTTCTGTTGCAGAGCGCATGCATTTTGACCACAGTGTTTCAGCTCTTCCCTTTTCTCTTG  
TTCCATTTAGGTGGCTTCCCACACTTCTGACTCGGACGTTCCCTCCGGTGTCACTGAGG  
TGGTCGTGAAGCTCTTTGACT

>2834

AGTTACGGGGGAATTTTATTTTTCCTTTGGAGGATGTTTTACTTTGGAGGATAACTGTTT  
TTTATTTTCAGGGAGGAGTGAGATGTGGATGTTGCTTTTGCACCTACGGGGGCATCTGAG  
TCCAGCTCCCCCAAGATGAG

>2835

TTCCCTGAAGAAAGTTGGATGGCATGATCTGTCTTCCCATCTTGAAACCGTATGGCAA  
TTGTTTTTCAGATGAATTCCTCTGCTGACAACCAAACGTGTGTTCTGGAAGGGTGTTT  
TGGAGGAGTTGCTGTGGTTTAT

>2836

CTCGGGGGGATCAACTGAGATGGCTTAAGATTTACCTGGATGCCTGCTCTGCTCTCCCC  
ATCTCTTCCAGGGATCCACAAATGCTAAAGAGCTGTCTTCCAAGGGAGTGAAAATCTG  
GGATGCCAATGGATCCCGAGACT

>2837

CCTCTAAGGCCATCTCATGACATGTGTGATTAATGTATGTACCTGTCCTCTCTTTTTGAC

AATTCTACAGATTATTCAGGACAGGGAGTTGACCAACTGCAAAGAGTGATTGACACCA  
TCAAACCAACCCTGACGACAG

>2838

TTTTACTTTGCCTTTAGCTGTGGTCTTTCAAACCACCATCCCTCCTTATCTTCCTCTGCT  
GGTTCCTCAGATCTTCCTCTGATGGCGCTGCCTCCATGCCATGCCCTCTGCCAGTTCTAT  
GTGGTGAACAGTGAGCTGTC

>2839

TCTAATGTTTTTAAATGATGTTTTAAAGAATTGAAACTAACATACTGTTCTGCTTTCTCC  
CGGTTTATAGCCAGGTGACTTTATACACACTTTGGGAGATGCACATATTTACCTGAATCA  
CATCGAGCCACTGAAAATTC

>2840

CACGGACATGAGGAGCAATTACAACAGGTCGTACAATTATGGCAAATAATGGCCTTAT  
TTTGTTTTTAGCTTCAGCGAGAACCCAGACCTTTCCCAAAGCTCAGGATTCTTCGAAA  
AGTTGAGAAAATTGATGACTTCA

>2841

GCGGACGCGTGGGCTTCGCCGTCTGGGGGCCGCGGGCTCAACCCTTGCCCTCCACCCCT  
CCGCGCGGCCAGGTGCCAGAGGACGAGCTGGTGTCCACGCTGAAGCAGCTGGTCTCC  
GAGAAGCTGAACGTCCCAGTGCGCC

>2842

GGCGGCCTCGCGCCCCGGGCCACCCCCACGGCGGTGGAGGAGGAGGAACCCATCGAT  
CTGTCTTTGGCAGATGGGAAACGACTCTCGGATTATAGCATCGGGCCCAACTCCAAGC  
TCAACCTAGTGGTCAAACCCCTGGA

>2843

CTACCTCTGTTGCAGTGTATGCCCCCCCCCACTGGCAGCCCCTGAATCTTCCTGCCCT  
TCTCTCCCCAGGATTACGAGAGGTCCCTGAGTCGCCTGACGCTGGACGACATCGAACG  
GTTGGCCAGCCGCTTCCTGCACC

>2844

CGGGAGGCAGGCCTGAGTCCCCCTGCACAGCACCCCTCTCTAACCAGGCCCTCTTCCCG  
ACTCCTGCCCAGCTGTGCCTGGGCATCCCTCTCTGCCAGCCTGCCAGCAACAGCAG  
CCAGGAGAGGCCACTGGACACCCG

>2845

TGGGCTTGGCCGCATGCCCCTGTGCCCCACCAGCCATCCTGAACCCAACCTAGATCCTC  
CACCTCCACAGGGGCGCCCTTTGTGCTACTCATGTTGCTGGCCAGCCTCAACAGCTGC  
ACCAACCCCTGGATCTATGCATC

>2846

ATACATGTACATGTAACATAATATTCATCAAAGGGGACACATACAAATTTTCTATTTCT  
GCCTCCTAGGCCGGGATTATGAAAAGAATAAAGTCTGCAAGGAATTCTCCCATCTGGG  
AAAGGAGGACTTCACATCTCT

>2847

GAGCGAGACTCCGTCTCAAAAAAAAAAACCTTTCAGTTCTAATTGATATATTGTCTTAT  
TTTCCCCTCAGGTCAGTCTGTACAGTAGAAAATTTCCAGTGGCACGTTTGAACA  
GGTCAGCCAACCTGTGAAGGAA

>2848

TATTAAATGGAAGTCTAAAAGCCTGGAAATTTACATATATATATGAGTTTCCTTTTCTCTT

CTCCTCCAGACCTCAGCACTGTCTGCCAAGTCCTGTGAAAGTAATTCTCCATTCCCCGT  
TCACCCAGGCACTGCTGAGT

>2849

TGTCTCAAATAAAAAAGTAGATTTTGTATTATTCACAAATTTTTTGACCAATTCTATTTTTT  
CCTCCACAGATTTATGTGGGAATATTCCACTAATTACGGACAAGCTCCTCTGTCACTTTT  
AGTCAGTTACACCAAGAGT

>2850

TATTTTTGCCATTTATACAGTATTCAATGAGTCTTGACCATATAATGAGATTCTTTCACTT  
GTTTTCTAGAGACTCCAGCTTAAACATTTATCACTTCTCACCCTCTGTCAAATAGAGT  
CTGCTCACAATATGCTGCTT

>2851

GTGCGTTCATCACGAAACCAAGAAAAGTGAAGAATGTTGATAAGCTAACATATTTATTTT  
TAACTGTTTAGCAATCTCATAAAGTTAGCCCCAAAAGTGCCTACTGCTGATCTGGAGGA  
TGTTTTGCCACTAGCTGAAGAT

>2852

TATGTAATTCTTATTTTTAATTAGACTATCAGGAACTAACAATGCACAACTAACCATT  
CGTTTTGTAGCTGCCTGAACACACAGTAAAAGTCTGTGACAATTTATCCACAAAGAATT  
CTAAGTTTGAAGACTGTTGTC

>2853

AAATAAATAAATAAATAAATAAATAAATAGGAAATATATAACACATATCTCCTTTTCTCCC  
TCATGCTAGGTATACATTTGAACTAAGCAGAAGGACTCATCTCCGGAAGTATTCCTCA  
GTAAGGTACTTGAGCCAACC

>2854

GATTTAATGGCTTGATGGGACAAGGTTTCAAGACAAATAATTTTGTTATGCAATTATTGT  
TTTCTTACAGGGCCCTCTACTAAAGAAGGAACTATCTTCTTTCATTGACAAGGGACAAG  
AACTATGTGCAGATTATTCAG

>2855

TTATTTTGCATTAGAAATTTGTATAAAATAAATACATGTAGTAAGACCTTACATTTAAATG  
GTTTTTCAGACTGGCAGAGCGACTAAAAGCAAAATTGCCTGAGGCCACACCCACGGA  
ACTGGCAAAGCTGGTTAACAAG

>2856

GAGCAATATTATGGTTGTTGCCCATTAGCTCTGTTTTTCTAACATAAAATTCATTTCATTA  
TTCTCATAGACCAGAGTTGGAGCCACCCAGGGGAATGATCTCTGATGACCTAACCTAA  
GCAAAACCACTGAGCTTCTGG

>2857

TCGCTGCGTTCCCTCCAACCCCTCGACTCCCGGCTCCCTCCTCCCGCTCACCCCGCC  
CGTCCCCGCAGTGCCTCCCCTGCGGCCCCGGGGGCAAAGGCCGCTGCTTCGGGCCCCA  
GCATCTGCTGCGCGGACGAGCTGG

>2858

AGGGTGTGGGCCCCCGCACCCCGAGCTGCGCCCGCCCCAGGCGCCCGTGCTCACAC  
GTCCTCCCGGCAGAGAGCTGCGTGACCGAGCCGAGTGCCGCGAGGGCTTTCACCGC  
CGCGCCCGCGCCAGCGACCGGAGCAA

>2859

TCCCAGAAAGCTATAAATCCAAGCTGGCTTCTCCCTCCCCACACAGCTGCTCCTGCTCT

CCCTCCTCCAGGTCACCCAGCCATGAGGATTATCGCCCTCCTCGCTGCTATTCTCTTG  
GTAGCCCTCCAGGTCCGGGCAG

>2860

TCCAAGATTCCCTTTACCACCCACCGCTGACCTTGGTGCTTAATTTCTCAGTCTTCCTCT  
GTGTTCCCAGGCTCAACAAGGGGCATGGTCTGCTCTTGCAGATTAGTATTCTGCCGGCG  
AACAGAACTTCGTGTTGGGAA

>2861

ACGTAATTTACCAGGCATGGGTTTTCCAGAGGAGGGGGCTGGTTCATGGTTTTGGTTT  
TGGTTTTCCAGAAGATTTTGTGATTCAGGCAAAGGCTGACTGTACTTCACCAACGGG  
ACAGAAAAGGTGCAGTTTGTGGT

>2862

TCCCTAAAGAATCTCCTGTCCCAGCTTGGTGGTTTTCTTTCACGGTGTCTCATTTTTCT  
CCCTTCCTAGTGCAACCAGAGGTGACAGTGTACCCAGAGAGGACCCCACTCCTGCACC  
AGCATAATCTGCTGCACTGCTC

>2863

TTCTGGGATTCCAAGAAAGTGCTTTAAATATTGGGATATTTTTACTAATTTAAAGACCTG  
TTTCCCATAGGAGCTCAGTCTGAATATTCTTGGAGAAAGATGCTGAGTGGCATTGCAGC  
CTTCCTACTTGGGCTAATCTT

>2864

CCTGAGTCTCTGGAACGGCTGTGGGGGGTGGTGAGGCTGCCTCCTGAGACCTTCATCA  
CTGTGCCTCCAGGTCTCAAGAGCTGTTCTGCTCCCTCAGTCATGCTAAGGTCCTCACTG  
AAGCTTCTCTCTCTGGAGCCTGA

>2865

GGGGGCGCAAGACCCGGGAAGCCGCGCCGGGAGGAGGGTCGGGCGGGTCTCAGCCA  
CTCCTCGTCCCCAGGCTCCCACTCCATGAGGTATTTCTCCACATCCGTGTCCCGGCCCG  
GCCGCGGGGAGCCCCGCTTCATCGC

>2866

AAAATCCCCCGGGTTGGTCGGGGGCCGGGCGGGGCTCGGGGGACTGGGCTGACCGCG  
GGGTCGGGGCCAGGTTCTCACACCCTCCAGATGATGTTTGGCTGCGACGTGGGGTTCGG  
ACGGGCGCTTCCTCCGCGGGTACCA

>2867

CCACATGCATGCTGGTGGAGTGTCCCATGACAGATGCAAAATGCCTGAATTTCTGACT  
CTTCCCCTCAGACCCCCCAAGACACATATGACCCACCACCCCATCTCTGACCATGAG  
GCCACTCTGAGATGCTGGGCCCT

>2868

AGGGAAAGCAGGAGCCTCTCTGGAGACCTTTAGCAGGGTCAGGGCCCCCTCACCTTCC  
CCTCTTTTCCCAGAGCCATCTTCCCAGCCACCGTCCCCATCGTGGGCATCATTGCTGG  
CCTGGTTCTCCTTGGAGCTGTGAT

>2869

CCCCACACAGGGAAGGGCTGGGCCCAGGCCTGGGGCTGCTTCCTGGTCCTGACCTG  
GCACCTGCCCCAGCCCCAGGCCAGGCCCTGCAGCGAGTGGGCATCGTCGGGGGGTCAG  
GAGGCCCCCAGGAGCAAGTGGCCCTG

>2870

ATGTGAGCCCTGGCTCCCGGGTGCTCCTGGGGGCTGCCAGGGCCCTGAGTGGGATCC

TCCGCTGCCCAGGGACGTCAAGGATCTGGCCGCCCTCAGGGTGCAACTGCGGGAGCA  
GCACCTCTACTACCAGGACCAGCTG

>2871

GGTCCCTCTGGGCTCCAGGTGGGGGTGCCCCGGCCCCCTCCTGAGGCTGCACCCTCTT  
CCCCACCTGCAGAGCGCCTCCCACCGCCATTTCTCTGAAGCAGGTGAAGGTCCCCAT  
AATGGAAAACCACATTTGTGACGC

>2872

CCCCCGCCCCCGCCCCCAACCCCCACTCCCAGGCCTGTTTCGGCGAGCGCTGACCTC  
TGACCTTCCCAGGGCGACTCCGGAGGGCCCCCTGGTGTGCAAGGTGAATGGCACCTGG  
CTGCAGGCGGGCGTGGTCAGCTGGG

>2873

CAGATGCCCAATGGGCCTGCCTGGCATCTCCCACACTGCTGTCCCTGGACACATACCTT  
TTTGCCCCCAGACATTATCCGGCAGCCCTCTGAGGAAGAGATCATCAAATTGGCTCCCC  
CACCGAAGAAGGCCTGAGCAAG

>2874

CGTTTTTGACAGTTTGACAGTTAAAGGCATTTCCCTGTGAAATAATACTGGTATGTATTT  
AACCATGCAGATCCTCAGTTTGTGGTCTGCCAGCTAAAGGTGAAGATATATTCTCCAA  
TTCAGGACCCACACGACGGGA

>2875

TAAAAAAATAAAACATCATTAATTAATATGTCATTTTCATTTCTTTTCTTTTCTTTT  
TTTTTTAGGACAAAATGTTTCACTTTTGGGTAAATACATTCTTCATACCAGGACCAGAG  
GAAACCTCAGAAAAAGTAG

>2876

AAATATATTTCACTAAATAGTTAAGATGAGTCATATTTGTGGGTTTTTCATTTTAAATTTTC  
TTTCTCTAGGTGAAGCTGTACTTCACAAAAACAGTAGAGGAGCCGTCAAATCCAGAGG  
CTAGCAGTTCAACTTCTGTAA

>2877

AACCAACCAGGAGGCTGGGGTACGCTGGAGAAGGAATGGGCTTCCTAACCTTGAGCC  
CTCTTCCCTGAAGATATATGTATCTACGGGGGCCTGGGGCTGGGCGGGCTCCTGCTTCT  
GGCAGTGGTCCTTCTGTCCGCCTG

>2878

CCCACCCATCCATCTATCCCTGCGGCCCCCTCTGCCCGCTCCTCTGACCAACACCTGC  
TTTGTCTGCAGGCACCACAGTGCTGTTGCCCTGGTCATTTTCTTTGGTCTTTGCCTTTT  
ATCCCTCCTCTTCATTGGTTT

>2879

CACGTAGAATAAAGAGGGCCGGGGCTGGTTTTTCGCTGCCGCACTAATCTGCGCCACCT  
TCTCTCTTTCAGGGGGAGCTTGAAGGAACTACTACTAAGCCCCTGGCCCCAAACCCAA  
GCTTCAGTCCCACTCCAGGCTTCA

>2880

GCGGAGGGCGCGGGATGCGGGGCGGGGCCTGGGGTTGCCGCCCAGGCTCACCGGCC  
CGCGTCCCCGCAGCTGATGACCCGCGACGCTGTACGCCGTGGTGGAGAACGTGCCCC  
CGTTGCGCTGGAAGGAATTCGTGCG

$\mathbf{S}_2^-$  : 2,800 false splice acceptor site containing sequences

>1

CATTCTGGATGATGCAGCGAACAATCCTCTCTACTGTGTCCTCATTCATGTCATTCGTCC  
TCAGCTGAAGGATGAAAGAGATTGGCAAGGAAGCAGGAATGAGTCAGCTTTGGGGGA  
ATATTACCTGGTGGCTCCCATCA

>2

ATGATGCAGCGAACAATCCTCTCTACTGTGTCCTCATTCATGTCATTCGTCTCAGCTGA  
AGGATGAAAGAGATTGGCAAGGAAGCAGGAATGAGTCAGCTTTGGGGGAATATTACCT  
GGTGGCTCCCATCATTTATTGC

>3

CTCTCTACTGTGTCCTCATTCATGTCATTCGTCTCAGCTGAAGGATGAAAGAGATTGG  
CAAGGAAGCAGGAATGAGTCAGCTTTGGGGGAATATTACCTGGTGGCTCCCATCATTTA  
TTGCTTTAGGACATACCCTTTT

>4

GGCAAGGAAGCAGGAATGAGTCAGCTTTGGGGGAATATTACCTGGTGGCTCCCATCAT  
TTATTGCTTTAGGACATACCCTTTTACCTACTTGCTATCATGCTGGACCTCAGCATTTCA  
GGGACCAGAAAAGATGGGGACA

>5

CTGGTGGCTCCCATCATTTATTGCTTTAGGACATACCCTTTTACCTACTTGCTATCATGCT  
GGACCTCAGCATTTTCAGGGACCAGAAAAGATGGGGACACCAATGCAAGCCCAAGACT  
ACCATCCAGAGGACCGTTCCTG

>6

TCCCATCATTTATTGCTTTAGGACATACCCTTTTACCTACTTGCTATCATGCTGGACCTCA  
GCATTTTCAGGGACCAGAAAAGATGGGGACACCAATGCAAGCCCAAGACTACCATCCA  
GAGGACCGTTCCTGCCCATGCT

>7

TTTACCTACTTGCTATCATGCTGGACCTCAGCATTTTCAGGGACCAGAAAAGATGGGGAC  
ACCAATGCAAGCCCAAGACTACCATCCAGAGGACCGTTCCTGCCCATGCTGCTTTCTCT  
AGTTTTGCTTTCAGAGTGGTGT

>8

TGCTGGACCTCAGCATTTTCAGGGACCAGAAAAGATGGGGACACCAATGCAAGCCCAA  
GACTACCATCCAGAGGACCGTTCCTGCCCATGCTGCTTTCTCTAGTTTTGCTTTCAGAG  
TGGTGTACCCCCACTTGCTAACTC

>9

CTGGACCTCAGCATTTTCAGGGACCAGAAAAGATGGGGACACCAATGCAAGCCCAAGA  
CTACCATCCAGAGGACCGTTCCTGCCCATGCTGCTTTCTCTAGTTTTGCTTTCAGAGTG  
GTGTCACCCCACTTGCTAACTCAA

>10

GATGGGGACACCAATGCAAGCCCAAGACTACCATCCAGAGGACCGTTCCTGCCCATGC  
TGCTTTCTCTAGTTTTGCTTTCAGAGTGGTGTACCCCCACTTGCTAACTCAAGAGTGCA  
TCACTAGGCTTCCTGAGCAGGTT

>11

ACCGTTCCTGCCCATGCTGCTTTCTCTAGTTTTGCTTTCAGAGTGGTGTACCCCCACTT  
GCTAACTCAAGAGTGCATCACTAGGCTTCCTGAGCAGGTTTGATCAGGATTTGGCCTG  
GGTCTGTTGGTCAGGGAGGCAGA

>12

CGTTCCTGCCCATGCTGCTTTCTCTAGTTTTGCTTTCAGAGTGGTGTCACCCCACTTGCT  
AACTCAAGAGTGCATCACTAGGCTTCCTGAGCAGGTTTGATCAGGATTTGGCCTGGGT  
CTGTTGGTCAGGGAGGCAGAGG

>13

TTCAGAGTGGTGTCACCCCACTTGCTAACTCAAGAGTGCATCACTAGGCTTCCTGAGC  
AGGTTTGATCAGGATTTGGCCTGGGTCTGTTGGTCAGGGAGGCAGAGGTGTGGGGAG  
AAGGGTGAAAGGTGACTGAGCCAGG

>14

TAACTCAAGAGTGCATCACTAGGCTTCCTGAGCAGGTTTGATCAGGATTTGGCCTGGG  
TCTGTTGGTCAGGGAGGCAGAGGTGTGGGGAGAAGGGTGAAAGGTGACTGAGCCAG  
GGTTCACAGGCTCCTCACTCACGGGG

>15

TCAAGAGTGCATCACTAGGCTTCCTGAGCAGGTTTGATCAGGATTTGGCCTGGGTCTGT  
TGGTCAGGGAGGCAGAGGTGTGGGGAGAAGGGTGAAAGGTGACTGAGCCAGGGTTC  
ACAGGCTCCTCACTCACGGGGCTGA

>16

ATCAGGATTTGGCCTGGGTCTGTTGGTCAGGGAGGCAGAGGTGTGGGGAGAAGGGTG  
AAAGGTGACTGAGCCAGGGTTCACAGGCTCCTCACTCACGGGGCTGAAGCTGGGCAT  
CGTCAGGCTCAGAGCCCCTAGACGTG

>17

GGATTTGGCCTGGGTCTGTTGGTCAGGGAGGCAGAGGTGTGGGGAGAAGGGTGAAAG  
GTGACTGAGCCAGGGTTCACAGGCTCCTCACTCACGGGGCTGAAGCTGGGCATCGTC  
AGGCTCAGAGCCCCTAGACGTGCGGC

>18

CTGGGTCTGTTGGTCAGGGAGGCAGAGGTGTGGGGAGAAGGGTGAAAGGTGACTGA  
GCCAGGGTTCACAGGCTCCTCACTCACGGGGCTGAAGCTGGGCATCGTCAGGCTCAG  
AGCCCCTAGACGTGCGGCAGCGGTAGC

>19

AGAGGTGTGGGGAGAAGGGTGAAAGGTGACTGAGCCAGGGTTCACAGGCTCCTCACT  
CACGGGGCTGAAGCTGGGCATCGTCAGGCTCAGAGCCCCTAGACGTGCGGCAGCGGT  
AGCCCTTCTTCTTGAGCACGTGGCAG

>20

GAAAGGTGACTGAGCCAGGGTTCACAGGCTCCTCACTCACGGGGCTGAAGCTGGGCA  
TCGTCAGGCTCAGAGCCCCTAGACGTGCGGCAGCGGTAGCCCTTCTTCTTGAGCACGT  
GGCAGATCATGAAGCCTACAGGCC

>21

AAGGTGACTGAGCCAGGGTTCACAGGCTCCTCACTCACGGGGCTGAAGCTGGGCATC  
GTCAGGCTCAGAGCCCCTAGACGTGCGGCAGCGGTAGCCCTTCTTCTTGAGCACGTGG  
CAGATCATGAAGCCTACAGGCCCAT

>22

CTGAGCCAGGGTTCACAGGCTCCTCACTCACGGGGCTGAAGCTGGGCATCGTCAGGC  
TCAGAGCCCCTAGACGTGCGGCAGCGGTAGCCCTTCTTCTTGAGCACGTGGCAGATCA  
TGAAGCCTACAGGCCCATGAGGAAG



>23

TTCACAGGCTCCTCACTCACGGGGCTGAAGCTGGGCATCGTCAGGCTCAGAGCCCCTA  
GACGTGCGGCAGCGGTAGCCCTTCTTCTTGAGCACGTGGCAGATCATGAAGCCTACAG  
GCCCATGAGGAAGAAGACCAGCAC

>24

GGGGCTGAAGCTGGGCATCGTCAGGCTCAGAGCCCCTAGACGTGCGGCAGCGGTAGC  
CCTTCTTCTTGAGCACGTGGCAGATCATGAAGCCTACAGGCCCATGAGGAAGAAGACC  
AGCACAAGCAGGAAGAGCATATATA

>25

GTCAGGCTCAGAGCCCCTAGACGTGCGGCAGCGGTAGCCCTTCTTCTTGAGCACGTGG  
CAGATCATGAAGCCTACAGGCCCATGAGGAAGAAGACCAGCACAAGCAGGAAGAGCA  
TATATAGCCCATGTTGGGGCGGTTC

>26

TCAGAGCCCCTAGACGTGCGGCAGCGGTAGCCCTTCTTCTTGAGCACGTGGCAGATCA  
TGAAGCCTACAGGCCCATGAGGAAGAAGACCAGCACAAGCAGGAAGAGCATATATAG  
CCCATGTTGGGGCGGTTCCAGGTCA

>27

CTAGACGTGCGGCAGCGGTAGCCCTTCTTCTTGAGCACGTGGCAGATCATGAAGCCTA  
CAGGCCCATGAGGAAGAAGACCAGCACAAGCAGGAAGAGCATATATAGCCCATGTTG  
GGGCGGTTCCAGGTCAGGCTGTGGT

>28

CAGCGGTAGCCCTTCTTCTTGAGCACGTGGCAGATCATGAAGCCTACAGGCCCATGAG  
GAAGAAGACCAGCACAAGCAGGAAGAGCATATATAGCCCATGTTGGGGCGGTTCCAG  
GTCAGGCTGTGGTTCCGACATGAGG

>29

ACAGGCCCATGAGGAAGAAGACCAGCACAAGCAGGAAGAGCATATATAGCCCATGTT  
GGGGCGGTTCCAGGTCAGGCTGTGGTTCCGACATGAGGCCCTGGGGGGCGAGCGCGG  
GCCAGGGCGCCTCCTGGGTTTAGGGG

>30

CCCATGAGGAAGAAGACCAGCACAAGCAGGAAGAGCATATATAGCCCATGTTGGGGC  
GGTTCCAGGTCAGGCTGTGGTTCCGACATGAGGCCCTGGGGGGCGAGCGCGGGCCAG  
GGCGCCTCCTGGGTTTAGGGGGCTGC

>31

GCACAAGCAGGAAGAGCATATATAGCCCATGTTGGGGCGGTTCCAGGTCAGGCTGTGG  
TTCCGACATGAGGCCCTGGGGGGCGAGCGCGGGCCAGGGCGCCTCCTGGGTTTAGGG  
GGCTGCAGCTGGGAATGGGGGAGGG

>32

CCCATGTTGGGGCGGTTCCAGGTCAGGCTGTGGTTCCGACATGAGGCCCTGGGGGGCG  
AGCGCGGGCCAGGGCGCCTCCTGGGTTTAGGGGGCTGCAGCTGGGAATGGGGGAGGG  
GTAAGAATGCCGTCCTCAGGATCTG

>33

CAGGTCAGGCTGTGGTTCCGACATGAGGCCCTGGGGGGCGAGCGCGGGCCAGGGCGC  
CTCCTGGGTTTAGGGGGCTGCAGCTGGGAATGGGGGAGGGGTAAAGAATGCCGTCCTC  
AGGATCTGAAACAAGCACGTCTAAGA

>34

TGTGGTTCCGACATGAGGCCCTGGGGGGCGAGCGGGGCCAGGGCGCCTCCTGGGTT  
TAGGGGGGCTGCAGCTGGGAATGGGGGAGGGGTAAGAATGCCGTCCTCAGGATCTGAA  
ACAAGCACGTCTAAGACGTCCGGCTG

>35

GGCCAGGGCGCCTCCTGGGTTTAGGGGGCTGCAGCTGGGAATGGGGGAGGGGTAAGA  
ATGCCGTCCTCAGGATCTGAAACAAGCACGTCTAAGACGTCCGGCTGAGGTCCGGCCC  
CACCCCCTACCCAACCATGGGAGCT

>36

CCTGGGTTTAGGGGGCTGCAGCTGGGAATGGGGGAGGGGTAAGAATGCCGTCCTCAG  
GATCTGAAACAAGCACGTCTAAGACGTCCGGCTGAGGTCCGGCCCCACCCCCTACCCA  
ACCATGGGAGCTGTCCGGGCCAACA

>37

GGGGGCTGCAGCTGGGAATGGGGGAGGGGTAAGAATGCCGTCCTCAGGATCTGAAAC  
AAGCACGTCTAAGACGTCCGGCTGAGGTCCGGCCCCACCCCCTACCCAACCATGGGA  
GCTGTCCGGGCCAACAGTGCTGTTTC

>38

AGGATCTGAAACAAGCACGTCTAAGACGTCCGGCTGAGGTCCGGCCCCACCCCCTACC  
CAACCATGGGAGCTGTCCGGGCCAACAGTGCTGTTTCGCCTTTCGGCAAGAGGTCAGC  
GACAACGCAAGCTCTCTACCACGA

>39

ACGTCTAAGACGTCCGGCTGAGGTCCGGCCCCACCCCCTACCCAACCATGGGAGCTGT  
CCGGGCCAACAGTGCTGTTTCGCCTTTCGGCAAGAGGTCAGCGACAACGCAAGCTCT  
CTACCACGACCATGGTCCGCTTCCC

>40

GTCCGGCCCCACCCCCTACCCAACCATGGGAGCTGTCCGGGCCAACAGTGCTGTTTCG  
CCTTTCGGCAAGAGGTCAGCGACAACGCAAGCTCTCTACCACGACCATGGTCCGCTTC  
CCCGACGCCCCGAGCGTTCCCCTT

>41

CCAACCATGGGAGCTGTCCGGGCCAACAGTGCTGTTTCGCCTTTCGGCAAGAGGTCAG  
CGACAACGCAAGCTCTCTACCACGACCATGGTCCGCTTCCCCGACGCCCCGAGCGTTC  
CCCTTTCAGCTTGTTTCGCGCTTC

>42

TTCGGCAAGAGGTCAGCGACAACGCAAGCTCTCTACCACGACCATGGTCCGCTTCCC  
CGACGCCCCGAGCGTTCCCCTTTCAGCTTGTTTCGCGCTTCTGTCCCTCCCAAGGACA  
CTGCAGCACGAGATGGGACGGCAT

>43

AGCGACAACGCAAGCTCTCTACCACGACCATGGTCCGCTTCCCCGACGCCCCGAGCGT  
TCCCCTTTCAGCTTGTTTCGCGCTTCTGTCCCTCCCAAGGACACTGCAGCACGAGATG  
GGACGGCATTCTTAGGCGGCGGGA

>44

CCATGGTCCGCTTCCCCGACGCCCCGAGCGTTCCCCTTTCAGCTTGTTTCGCGCTTCTG  
TCCCTCCCAAGGACACTGCAGCACGAGATGGGACGGCATTCTTAGGCGGCGGGAGCA  
GAAATCCTGCCTGAGTCAGCGCCC

>45

CTTCCCCGACGCCCCGAGCGTTCCCCTTTCCAGCTTGTTTCGCGCTTCTGTCCCTCCCAA  
GGACACTGCAGCACGAGATGGGACGGCATTCTTAGGCGGGCGGGAGCAGAAATCCTGC  
CTGAGTCAGCGCCCGCACCTCCTC

>46

CCTTTCCAGCTTGTTTCGCGCTTCTGTCCCTCCCAAGGACACTGCAGCACGAGATGGGA  
CGGCATTCTTAGGCGGGCGGGAGCAGAAATCCTGCCTGAGTCAGCGCCCGCACCTCCTC  
CACGCCGGCCTGAGCCAGGCCTCT

>47

TTGTTTCGCGCTTCTGTCCCTCCCAAGGACACTGCAGCACGAGATGGGACGGCATTCTT  
AGGCGGGCGGGAGCAGAAATCCTGCCTGAGTCAGCGCCCGCACCTCCTCCACGCCGGC  
CTGAGCCAGGCCTCTGCAGCCCCTT

>48

CCTCCCAAGGACACTGCAGCACGAGATGGGACGGCATTCTTAGGCGGGCGGGAGCAGA  
AATCCTGCCTGAGTCAGCGCCCGCACCTCCTCCACGCCGGCCTGAGCCAGGCCTCTGC  
AGCCCCTTCCTCTCAGTACTCCCGC

>49

GCATTCTTAGGCGGGCGGGAGCAGAAATCCTGCCTGAGTCAGCGCCCGCACCTCCTCCA  
CGCCGGCCTGAGCCAGGCCTCTGCAGCCCCTTCCTCTCAGTACTCCCGCACCCCTCTC  
CCTTTTTGGTTTCTCCCACCCTGA

>50

TCTTAGGCGGGCGGGAGCAGAAATCCTGCCTGAGTCAGCGCCCGCACCTCCTCCACGCC  
GGCCTGAGCCAGGCCTCTGCAGCCCCTTCCTCTCAGTACTCCCGCACCCCTCTCCCTTT  
TTGGTTTCTCCCACCCTGACCAC

>51

CGGGAGCAGAAATCCTGCCTGAGTCAGCGCCCGCACCTCCTCCACGCCGGCCTGAGC  
CAGGCCTCTGCAGCCCCTTCCTCTCAGTACTCCCGCACCCCTCTCCCTTTTTGGTTTCT  
CCCACCCTGACCACCTGGCCGACC

>52

TGACCACCTGGCCGACCCGGTACCGGTGATTTGGTTCTGGTTCCGGCTTCTGCTGGGG  
TTCCGGCTCCAGGGGCGTCCTAGTGCGGCTCAGGGCCCCCGACGCCCTTCCGGCGCTC  
ATCCCTTGATTCATCCCCTCCCCC

>53

CCGACCCGGTACCGGTGATTTGGTTCTGGTTCCGGCTTCTGCTGGGGTTCCGGCTCCAG  
GGGCGTCCTAGTGCGGCTCAGGGCCCCCGACGCCCTTCCGGCGCTCATCCCTTGATTCA  
TCCCCTCCCCCTTCGCCGCCTC

>54

GATTCATCCCCTCCCCCTTCGCCGCCTACCGGCCCCGGGCTGTGGCTGCGGATACCCG  
CGCCGTGGCAGGCGGGGGGAGGGAAGAACAGAGAAGGATGCGGGCTGGCTGAGAGC  
GGTGGCAGGCTCCGGGCAACTCCGG

>55

CTCCCCCTTCGCCGCCTACCGGCCCCGGGCTGTGGCTGCGGATACCCGCGCCGTGGC  
AGGCGGGGGGAGGGAAGAACAGAGAAGGATGCGGGCTGGCTGAGAGCGGTGGCAGG  
CTCCGGGCAACTCCGGCCCTGGGTCA

>56

GTGGCTGCGGATACCCGCGCCGTGGCAGGCGGGGGGAGGGAAGAACAGAGAAGGAT  
GCGGGCTGGCTGAGAGCGGTGGCAGGCTCCGGGCAACTCCGGCCCTGGGTGAGGGAG  
ATTGCCTCCGCAGCCGCCCTGGCTTCC

>57

GGCTGCGGATACCCGCGCCGTGGCAGGCGGGGGGAGGGAAGAACAGAGAAGGATGC  
GGGCTGGCTGAGAGCGGTGGCAGGCTCCGGGCAACTCCGGCCCTGGGTGAGGGAGAT  
TGCCTCCGCAGCCGCCCTGGCTTCCCA

>58

GAAGAACAGAGAAGGATGCGGGCTGGCTGAGAGCGGTGGCAGGCTCCGGGCAACTC  
CGGCCCTGGGTGAGGGAGATTGCCTCCGCAGCCGCCCTGGCTTCCCAAATGCCTTCAC  
CCGTCGCGGGCCCAGGACCAGGGGGC

>59

GCGGGCTGGCTGAGAGCGGTGGCAGGCTCCGGGCAACTCCGGCCCTGGGTGAGGGAG  
ATTGCCTCCGCAGCCGCCCTGGCTTCCCAAATGCCTTCACCCGTCGCGGGCCCAGGAC  
CAGGGGGCGGAGCGCAGGTGTGCGG

>60

CCCTGGGTGAGGGAGATTGCCTCCGCAGCCGCCCTGGCTTCCCAAATGCCTTCACCCG  
TCGCGGGCCCAGGACCAGGGGGCGGAGCGCAGGTGTGCGGGGCGGAGAGCGTGAGC  
TCTGCGCGCGCGTGA CTGCGCCGGGC

>61

ATTGCCTCCGCAGCCGCCCTGGCTTCCCAAATGCCTTCACCCGTCGCGGGCCCAGGAC  
CAGGGGGCGGAGCGCAGGTGTGCGGGGCGGAGAGCGTGAGCTCTGCGCGCGCGTGAC  
CTGCGCCGGGCCCCCCCCGGGGCAATG

>62

CTCCGCAGCCGCCCTGGCTTCCCAAATGCCTTCACCCGTCGCGGGCCCAGGACCAGGG  
GGCGGAGCGCAGGTGTGCGGGGCGGAGAGCGTGAGCTCTGCGCGCGCGTGA CTGCG  
CCGGGCCCCCCCCGGGGCAATGTGCGG

>63

GGCTTCCCAAATGCCTTCACCCGTCGCGGGCCCAGGACCAGGGGGCGGAGCGCAGGT  
GTGCGGGGCGGAGAGCGTGAGCTCTGCGCGCGCGTGA CTGCGCCGGGCCCCCCCCGGG  
GCAATGTGCGGCGCCGAGTTTGGGTC

>64

GGGCGGAGAGCGTGAGCTCTGCGCGCGCGTGA CTGCGCCGGGCCCCCCCCGGGGCAAT  
GTGCGGCGCCGAGTTTGGGTCCGGGTAGGGGACAGGCGGTCCGGCGTGGGTGTTGTC  
CACTGGTCTATCCGGTACGCCTGGCG

>65

GCTCTGCGCGCGCGTGA CTGCGCCGGGCCCCCCCCGGGGCAATGTGCGGCGCCGAGTT  
TGGGTCCGGGTAGGGGACAGGCGGTCCGGCGTGGGTGTTGTCCACTGGTCTATCCGGT  
ACGCCTGGCGCAGCTCCTGCCCTCA

>66

GGGTCCGGGTAGGGGACAGGCGGTCCGGCGTGGGTGTTGTCCACTGGTCTATCCGGTA  
CGCCTGGCGCAGCTCCTGCCCTCAGATGCCCCGACCGAGCGGAGAGTCAGGAATCTTC  
TCCGAGGGCTGGGGGAAGCCGGCT

>67

GGACAGGCGGTCCGGCGTGGGTGTTGTCCACTGGTCTATCCGGTACGCCTGGCGCAGC  
TCCTGCCCTCAGATGCCCCGACCGAGCGGAGAGTCAGGAATCTTCTCCGAGGGCTGGG  
GGAAGCCGGCTTTCCGCACCTTTG

>68

GCGTGGGTGTTGTCCACTGGTCTATCCGGTACGCCTGGCGCAGCTCCTGCCCTCAGATG  
CCCCGACCGAGCGGAGAGTCAGGAATCTTCTCCGAGGGCTGGGGGAAGCCGGCTTTC  
CGCACCTTTGAGGGACGGAGTGGC

>69

GGTGTGTTGTCCACTGGTCTATCCGGTACGCCTGGCGCAGCTCCTGCCCTCAGATGCCCCG  
ACCGAGCGGAGAGTCAGGAATCTTCTCCGAGGGCTGGGGGAAGCCGGCTTTCCGCAC  
CTTTGAGGGACGGAGTGGCGGGAT

>70

CCGGTACGCCTGGCGCAGCTCCTGCCCTCAGATGCCCCGACCGAGCGGAGAGTCAGG  
AATCTTCTCCGAGGGCTGGGGGAAGCCGGCTTTCCGCACCTTTGAGGGACGGAGTGG  
CGGGATCTTCGGAGCTTCCTAGAGAA

>71

GCCCCGACCGAGCGGAGAGTCAGGAATCTTCTCCGAGGGCTGGGGGAAGCCGGCTTT  
CCGCACCTTTGAGGGACGGAGTGGCGGGATCTTCGGAGCTTCCTAGAGAAGTGACCA  
CGGCCTGCGCCCGGTTTGGGGCAAGC

>72

CGAGCGGAGAGTCAGGAATCTTCTCCGAGGGCTGGGGGAAGCCGGCTTTCCGCACCT  
TTGAGGGACGGAGTGGCGGGATCTTCGGAGCTTCCTAGAGAAGTGACCACGGCCTGC  
GCCCCGTTTGGGGCAAGCGGCTGGAT

>73

ATCTTCTCCGAGGGCTGGGGGAAGCCGGCTTTCCGCACCTTTGAGGGACGGAGTGGC  
GGGATCTTCGGAGCTTCCTAGAGAAGTGACCACGGCCTGCGCCCGGTTTGGGGCAAG  
CGGCTGGATGGGATGGCTCGGCTTCC

>74

GGGACGGAGTGGCGGGATCTTCGGAGCTTCCTAGAGAAGTGACCACGGCCTGCGCCC  
GGTTTGGGGCAAGCGGCTGGATGGGATGGCTCGGCTTCCCGAGGATCTGACCCCCGGC  
CGGAGACAAATGGCCCTCGCATCCT

>75

CTAGAGAAGTGACCACGGCCTGCGCCCGGTTTGGGGCAAGCGGCTGGATGGGATGGC  
TCGGCTTCCCGAGGATCTGACCCCCGGCCGGAGACAAATGGCCCTCGCATCCTAGGAG  
CTATGCTGCCAGTTCCCTGCCCAAC

>76

TGCGCCCGGTTTGGGGCAAGCGGCTGGATGGGATGGCTCGGCTTCCCGAGGATCTGAC  
CCCCGGCCGGAGACAAATGGCCCTCGCATCCTAGGAGCTATGCTGCCAGTTCCCTGCC  
CAACCCGGGACGCTCAAAGCCCCA

>77

GCTGGATGGGATGGCTCGGCTTCCCGAGGATCTGACCCCCGGCCGGAGACAAATGGCC  
CTCGCATCCTAGGAGCTATGCTGCCAGTTCCCTGCCCAACCCGGGACGCTCAAAGCCC  
CAGATACCGGGAGAGCTGAGCCGG

>78

TCGGCTTCCCGAGGATCTGACCCCCGGCCGGAGACAAATGGCCCTCGCATCCTAGGAG  
CTATGCTGCCAGTTCCCTGCCCCAACCCGGGACGCTCAAAGCCCCAGATACCGGGAGAG  
CTGAGCCGGGCGAGGGGCGGAGCT

>79

CGGAGACAAATGGCCCTCGCATCCTAGGAGCTATGCTGCCAGTTCCCTGCCCCAACCCG  
GGACGCTCAAAGCCCCAGATACCGGGAGAGCTGAGCCGGGCGAGGGGCGGAGCTCCC  
CTGGGGGCGTGGCCTGGGTGTGGAT

>80

CAAATGGCCCTCGCATCCTAGGAGCTATGCTGCCAGTTCCCTGCCCCAACCCGGGACGC  
TCAAAGCCCCAGATACCGGGAGAGCTGAGCCGGGCGAGGGGCGGAGCTCCCCTGGGG  
GCGTGGCCTGGGTGTGGATGGAGGC

>81

TCGCATCCTAGGAGCTATGCTGCCAGTTCCCTGCCCCAACCCGGGACGCTCAAAGCCCC  
AGATACCGGGAGAGCTGAGCCGGGCGAGGGGCGGAGCTCCCCTGGGGGCGTGGCCTG  
GGTGTGGATGGAGGCGGGGCCGCA

>82

AGTTCCCTGCCCCAACCCGGGACGCTCAAAGCCCCAGATACCGGGAGAGCTGAGCCGG  
GCGAGGGGCGGAGCTCCCCTGGGGGCGTGGCCTGGGTGTGGATGGAGGCGGGGCCG  
AACGCCAGTTCCGCAGAGGCCGGCT

>83

AGATACCGGGAGAGCTGAGCCGGGCGAGGGGCGGAGCTCCCCTGGGGGCGTGGCCTG  
GGTGTGGATGGAGGCGGGGCCGCAACGCCAGTTCCGCAGAGGCCGGCTACTTGCTT  
GCGCAGCACGCACGGCCGGGGAGGGG

>84

CCGGGCGAGGGGCGGAGCTCCCCTGGGGGCGTGGCCTGGGTGTGGATGGAGGCGGG  
GCCGCAACGCCAGTTCCGCAGAGGCCGGCTACTTGCTTGCGCAGCACGCACGGCCG  
GGGAGGGGCTGGCGGCGGCCGCGGGCG

>85

TGGCCTGGGTGTGGATGGAGGCGGGGCCGCAACGCCAGTTCCGCAGAGGCCGGCTA  
CTTGCTTGCGCAGCACGCACGGCCGGGAGGGGCTGGCGGCGGCCGCGGGCGGCGG  
GCGGCGGAGTCGCGGGGCCTGCTCCCC

>86

GAGGCGGGGCCGCAACGCCAGTTCCGCAGAGGCCGGCTACTTGCTTGCGCAGCACG  
CACGGCCGGGAGGGGCTGGCGGCGGCCGCGGGCGGCGGGCGGCGGAGTCGCGGGG  
CCTGCTCCCGCCGGCACCATGGCCAAG

>87

GGCTACTTGCTTGCGCAGCACGCACGGCCGGGAGGGGCTGGCGGCGGCCGCGGGCG  
GCGGGCGGCGGAGTCGCGGGGCCTGCTCCCGCCGGCACCATGGCCAAGACCGTGGCC  
TATTCTACGACCCCGACGTGGGCAA

>88

GGGCTGGCGGCGGCCGCGGGCGGCGGGCGGCGGAGTCGCGGGGCCTGCTCCCGCCG  
GCACCATGGCCAAGACCGTGGCCTATTCTACGACCCCGACGTGGGCAACTTCCACTA  
CGGTGAGGAAACAGGGCTATGCATGA

>89

CGCCGGCACCATGGCCAAGACCGTGGCCTATTTCTACGACCCCGACGTGGGCAACTTC  
CACTACGGTGAGGAAACAGGGCTATGCATGAGGGGTTGGGACACGGAGGTTTTGAGG  
CGGGGTTGCAACTCCAGGGGTGAGA

>90

ACCATGGCCAAGACCGTGGCCTATTTCTACGACCCCGACGTGGGCAACTTCCACTACG  
GTGAGGAAACAGGGCTATGCATGAGGGGTTGGGACACGGAGGTTTTGAGGCGGGGTT  
GCAACTCCAGGGGTGAGAGCTGACG

>91

CGACCCCGACGTGGGCAACTTCCACTACGGTGAGGAAACAGGGCTATGCATGAGGGG  
TTGGGACACGGAGGTTTTGAGGCGGGGTTGCAACTCCAGGGGTGAGAGCTGACGAAC  
TCTCTTCTCCCCACCCCCAGGAGCTG

>92

ACGTGGGCAACTTCCACTACGGTGAGGAAACAGGGCTATGCATGAGGGGTTGGGACA  
CGGAGGTTTTGAGGCGGGGTTGCAACTCCAGGGGTGAGAGCTGACGAACTCTCTTCT  
CCCCACCCCCAGGAGCTGGACACCCT

>93

ACGGTGAGGAAACAGGGCTATGCATGAGGGGTTGGGACACGGAGGTTTTGAGGCGGG  
GTTGCAACTCCAGGGGTGAGAGCTGACGAACTCTCTTCTCCCCACCCCCAGGAGCTG  
GACACCCTATGAAGCCTCATCGCCTG

>94

GAGGTTTTGAGGCGGGGTTGCAACTCCAGGGGTGAGAGCTGACGAACTCTCTTCTCC  
CCACCCCCAGGAGCTGGACACCCTATGAAGCCTCATCGCCTGGCATTGACCCATAGCC  
TGGTCCTGCATTACGGTCTCTATAA

>95

TTGCAACTCCAGGGGTGAGAGCTGACGAACTCTCTTCTCCCCACCCCCAGGAGCTGG  
ACACCCTATGAAGCCTCATCGCCTGGCATTGACCCATAGCCTGGTCCTGCATTACGGTC  
TCTATAAGAAGATGATCGTGAGTT

>96

GAACTCTCTTCTCCCCACCCCCAGGAGCTGGACACCCTATGAAGCCTCATCGCCTGGC  
ATTGACCCATAGCCTGGTCCTGCATTACGGTCTCTATAAGAAGATGATCGTGAGTTCCG  
CCGCCTCGGCCGGGGGTTGGGGG

>97

TGGACACCCTATGAAGCCTCATCGCCTGGCATTGACCCATAGCCTGGTCCTGCATTACG  
GTCTCTATAAGAAGATGATCGTGAGTTCCGCCGCCTCGGCCGGGGGTTGGGGGGTGGG  
GCGAGCTGTGGCCGTAGGGATAG

>98

ACACCCTATGAAGCCTCATCGCCTGGCATTGACCCATAGCCTGGTCCTGCATTACGGTC  
TCTATAAGAAGATGATCGTGAGTTCCGCCGCCTCGGCCGGGGGTTGGGGGGTGGGGCG  
AGCTGTGGCCGTAGGGATAGGTG

>99

CATTACGGTCTCTATAAGAAGATGATCGTGAGTTCCGCCGCCTCGGCCGGGGGTTGGG  
GGGTGGGGCGAGCTGTGGCCGTAGGGATAGGTGGGCTGGACTGAGTGCATGAAGTGC  
GACCCGCCCTAGAGTATCGGGGAG

>100

TATAAGAAGATGATCGTGAGTTCCGCCGCCTCGGCCGGGGGTTGGGGGGTGGGGCGA  
GCTGTGGCCGTAGGGATAGGTGGGCTGGACTGAGTGCATGAAGTGCGACCCGCCCTA  
GAGTATCGGGGAGCTGGATAGAAGT

>101

TCCGCCGCCTCGGCCGGGGGTTGGGGGGTGGGGCGAGCTGTGGCCGTAGGGATAGGT  
GGGCTGGACTGAGTGCATGAAGTGCGACCCGCCCTAGAGTATCGGGGAGCTGGATAG  
AAGTCACCAGGAGTACCTTGAAAGT

>102

GGGTGGGGCGAGCTGTGGCCGTAGGGATAGGTGGGCTGGACTGAGTGCATGAAGTGC  
GACCCGCCCTAGAGTATCGGGGAGCTGGATAGAAGTCACCAGGAGTACCTTGAAAGT  
GCAGGGTGTTGGGGGTGGCGTCCTC

>103

GTGGGGCGAGCTGTGGCCGTAGGGATAGGTGGGCTGGACTGAGTGCATGAAGTGCGA  
CCCGCCCCTAGAGTATCGGGGAGCTGGATAGAAGTCACCAGGAGTACCTTGAAAGTGC  
AGGGTGTTGGGGGTGGCGTCCTCTG

>104

GTAGGGATAGGTGGGCTGGACTGAGTGCATGAAGTGCGACCCGCCCTAGAGTATCGG  
GGAGCTGGATAGAAGTCACCAGGAGTACCTTGAAAGTGCAGGGTGTTGGGGGTGGCG  
TCCTCTGCTTAATGGAAAGTACTTT

>105

TGAAGTGCGACCCGCCCTAGAGTATCGGGGAGCTGGATAGAAGTCACCAGGAGTACC  
TTGAAAGTGCAGGGTGTTGGGGGTGGCGTCCTCTGCTTAATGGAAAGTACTTTCTCAC  
CTCAGGTCGGCCACCCTCTGACTG

>106

GGATAGAAGTCACCAGGAGTACCTTGAAAGTGCAGGGTGTTGGGGGTGGCGTCCTCT  
GCTTAATGGAAAGTACTTTCTCACCTCAGGTCGGCCACCCTCTGACTGTAGGCACACTA  
GCCCTTGGCCTAGGGTTAGCGTGA

>107

GAGTACCTTGAAAGTGCAGGGTGTTGGGGGTGGCGTCCTCTGCTTAATGGAAAGTACT  
TTCTCACCTCAGGTCGGCCACCCTCTGACTGTAGGCACACTAGCCCTTGGCCTAGGGTT  
AGCGTGATGTGGGGCTGGTTTGA

>108

GTTGGGGGTGGCGTCCTCTGCTTAATGGAAAGTACTTTCTCACCTCAGGTCGGCCACC  
CTCTGACTGTAGGCACACTAGCCCTTGGCCTAGGGTTAGCGTGATGTGGGGCTGGTTT  
GAAGACAGAAGGTGTGTTCCCTCCT

>109

GGCGTCCTCTGCTTAATGGAAAGTACTTTCTCACCTCAGGTCGGCCACCCTCTGACTGT  
AGGCACACTAGCCCTTGGCCTAGGGTTAGCGTGATGTGGGGCTGGTTTGAAGACAGAA  
GGTGTGTTCCCTCCTCTGCATTTT

>110

GAAAGTACTTTCTCACCTCAGGTCGGCCACCCTCTGACTGTAGGCACACTAGCCCTTG  
GCCTAGGGTTAGCGTGATGTGGGGCTGGTTTGAAGACAGAAGGTGTGTTCCCTCCTCTG  
CATTTTAGAGTGTGGATAGGGCCT



>111

CGGCCACCCTCTGACTGTAGGCACACTAGCCCTTGGCCTAGGGTTAGCGTGATGTGGG  
GCTGGTTTGAAGACAGAAGGTGTGTTCCCTCCTCTGCATTTTAGAGTGTGGATAGGGCC  
TTGGCCTCAGGAATTAGGGTTAGG

>112

CACCCTCTGACTGTAGGCACACTAGCCCTTGGCCTAGGGTTAGCGTGATGTGGGGCTG  
GTTTGAAGACAGAAGGTGTGTTCCCTCCTCTGCATTTTAGAGTGTGGATAGGGCCTTG  
CCTCAGGAATTAGGGTTAGGGGAG

>113

CTTGGCCTAGGGTTAGCGTGATGTGGGGCTGGTTTGAAGACAGAAGGTGTGTTCCCTCC  
TCTGCATTTTAGAGTGTGGATAGGGCCTTGGCCTCAGGAATTAGGGTTAGGGGAGCGG  
ATATCACTGTATCAGGGTGTGAGG

>114

GGGCTGGTTTGAAGACAGAAGGTGTGTTCCCTCCTCTGCATTTTAGAGTGTGGATAGGG  
CCTTGGCCTCAGGAATTAGGGTTAGGGGAGCGGATATCACTGTATCAGGGTGTGAGGT  
TTACCCTCAGTTCCCACTCCTCTT

>115

TTTGAAGACAGAAGGTGTGTTCCCTCCTCTGCATTTTAGAGTGTGGATAGGGCCTTGGCC  
TCAGGAATTAGGGTTAGGGGAGCGGATATCACTGTATCAGGGTGTGAGGTTTACCCTCA  
GTTCCCACTCCTCTTTTACCAC

>116

GACAGAAGGTGTGTTCCCTCCTCTGCATTTTAGAGTGTGGATAGGGCCTTGGCCTCAGG  
AATTAGGGTTAGGGGAGCGGATATCACTGTATCAGGGTGTGAGGTTTACCCTCAGTTCC  
CACTCCTCTTTTACCACCTTTCT

>117

GCATTTTAGAGTGTGGATAGGGCCTTGGCCTCAGGAATTAGGGTTAGGGGAGCGGATAT  
CACTGTATCAGGGTGTGAGGTTTACCCTCAGTTCCCACTCCTCTTTTACCACCTTTCTTT  
ACCTCCAAGGAGCTAGGGCTC

>118

TCACTGTATCAGGGTGTGAGGTTTACCCTCAGTTCCCACTCCTCTTTTACCACCTTTCTT  
TACCTCCAAGGAGCTAGGGCTCCAGGGTGGAACGATGCTGCCGTCTTTGTAAATGTGT  
ATGTGCGTGTGGAACAGAGGCG

>119

CTGTATCAGGGTGTGAGGTTTACCCTCAGTTCCCACTCCTCTTTTACCACCTTTCTTTAC  
CTCCAAGGAGCTAGGGCTCCAGGGTGGAACGATGCTGCCGTCTTTGTAAATGTGTATG  
TGCGTGTGGAACAGAGGCGATA

>120

CCAAGGAGCTAGGGCTCCAGGGTGGAACGATGCTGCCGTCTTTGTAAATGTGTATGTG  
CGTGTGGAACAGAGGCGATATTTAGATATTCCTTTTTTCAGCCTGGAATACCTCTACATG  
GTTCTGCTTAATCGCTATCCAG

>121

AAGGAGCTAGGGCTCCAGGGTGGAACGATGCTGCCGTCTTTGTAAATGTGTATGTGCG  
TGTGGAACAGAGGCGATATTTAGATATTCCTTTTTTCAGCCTGGAATACCTCTACATGGT  
TCTGCTTAATCGCTATCCAGTT

>122

ATGCTGCCGTCTTTGTAAATGTGTATGTGCGTGTGGAACAGAGGCGATATTTTAGATATT  
CCTTTTTTCAGCCTGGAATACCTCTACATGGTTCTGCTTAATCGCTATCCAGTTTTTCATCT  
ACCAGACATACACATGCTG

>123

AGGCGATATTTTAGATATTCCTTTTTTCAGCCTGGAATACCTCTACATGGTTCTGCTTAATC  
GCTATCCAGTTTTTCATCTACCAGACATACACATGCTGTCTTCCCAGCTTGGAATTTATG  
GCTGTGATATGGGATAGTA

>124

TATTCCTTTTTTCAGCCTGGAATACCTCTACATGGTTCTGCTTAATCGCTATCCAGTTTTTC  
ATCTACCAGACATACACATGCTGTCTTCCCAGCTTGGAATTTATGGCTGTGATATGGGAT  
AGTAACAGTTAAGCCACGC

>125

CCTCTACATGGTTCTGCTTAATCGCTATCCAGTTTTTCATCTACCAGACATACACATGCT  
GTCTTCCCAGCTTGGAATTTATGGCTGTGATATGGGATAGTAACAGTTAAGCCACGCCA  
GGCGTGGTGGCCCATGCCTGT

>126

AGTTTTTCATCTACCAGACATACACATGCTGTCTTCCCAGCTTGGAATTTATGGCTGTGA  
TATGGGATAGTAACAGTTAAGCCACGCCAGGCGTGGTGGCCCATGCCTGTAATCCCAGC  
ACTTTGGGAGGTTGAAATGGG

>127

TCATCTACCAGACATACACATGCTGTCTTCCCAGCTTGGAATTTATGGCTGTGATATGGG  
ATAGTAACAGTTAAGCCACGCCAGGCGTGGTGGCCCATGCCTGTAATCCCAGCACTTT  
GGGAGGTTGAAATGGGGGGGAT

>128

TACCAGACATACACATGCTGTCTTCCCAGCTTGGAATTTATGGCTGTGATATGGGATAGT  
AACAGTTAAGCCACGCCAGGCGTGGTGGCCCATGCCTGTAATCCCAGCACTTTGGGAG  
GTTGAAATGGGGGGGATCGCTT

>129

TACACATGCTGTCTTCCCAGCTTGGAATTTATGGCTGTGATATGGGATAGTAACAGTTAA  
GCCACGCCAGGCGTGGTGGCCCATGCCTGTAATCCCAGCACTTTGGGAGGTTGAAATG  
GGGGGGATCGCTTGAGGCCAGG

>130

TTATGGCTGTGATATGGGATAGTAACAGTTAAGCCACGCCAGGCGTGGTGGCCCATGCC  
TGTAATCCCAGCACTTTGGGAGGTTGAAATGGGGGGGATCGCTTGAGGCCAGGAGTTG  
GAGACCAGCTTGGGCCACAGTGG

>131

CGCCAGGCGTGGTGGCCCATGCCTGTAATCCCAGCACTTTGGGAGGTTGAAATGGGGG  
GGATCGCTTGAGGCCAGGAGTTGGAGACCAGCTTGGGCCACAGTGGGACCCACATCT  
ACAAAAAATAAAAAATAAAAAAAGTA

>132

GGCGTGGTGGCCCATGCCTGTAATCCCAGCACTTTGGGAGGTTGAAATGGGGGGGATC  
GCTTGAGGCCAGGAGTTGGAGACCAGCTTGGGCCACAGTGGGACCCACATCTACAAA  
AAATAAAAAATAAAAAAAGTAGCCAT

>133

CAGCACTTTGGGAGGTTGAAATGGGGGGGATCGCTTGAGGCCAGGAGTTGGAGACCA  
GCTTGGGCCACAGTGGGACCCACATCTACAAAAAATAAAAAAAGTAGCCATG  
TGCGGTGGGTGTGCCTGTAGTCCCA

>134

AGGCCAGGAGTTGGAGACCAGCTTGGGCCACAGTGGGACCCACATCTACAAAAAATA  
AAAATAAAAAAAGTAGCCATGTGCGGTGGGTGTGCCTGTAGTCCCAACTACTTGGGAG  
GCCGAGGCGAGAGGATGGCTTGGGC

>135

CCAGGAGTTGGAGACCAGCTTGGGCCACAGTGGGACCCACATCTACAAAAAATAAAA  
ATAAAAAAAGTAGCCATGTGCGGTGGGTGTGCCTGTAGTCCCAACTACTTGGGAGGCC  
GAGGCGAGAGGATGGCTTGGGCCCA

>136

CTACAAAAAATAAAAAAATAAAAAAAGTAGCCATGTGCGGTGGGTGTGCCTGTAGTCCCA  
ACTACTTGGGAGGCCGAGGCGAGAGGATGGCTTGGGCCCAGGAGTTTAAAGTTACAG  
TGATCTATGATCAGCAGCCTGAGTT

>137

AAAATAAAAAAATAAAAAAAGTAGCCATGTGCGGTGGGTGTGCCTGTAGTCCCAACTACT  
TGGGAGGCCGAGGCGAGAGGATGGCTTGGGCCCAGGAGTTTAAAGTTACAGTGATCTA  
TGATCAGCAGCCTGAGTTGACAGG

>138

CATGTGCGGTGGGTGTGCCTGTAGTCCCAACTACTTGGGAGGCCGAGGCGAGAGGATG  
GCTTGGGCCCAGGAGTTTAAAGTTACAGTGATCTATGATCAGCAGCCTGAGTTGACAG  
GGAGGACCTTGTCTCAAAAGAAAA

>139

GCCTGTAGTCCCAACTACTTGGGAGGCCGAGGCGAGAGGATGGCTTGGGCCCAGGAG  
TTTAAAGTTACAGTGATCTATGATCAGCAGCCTGAGTTGACAGGGAGGACCTTGTCTCA  
AAAGAAAAAATAAGACAAAACAGC

>140

CTACTTGGGAGGCCGAGGCGAGAGGATGGCTTGGGCCCAGGAGTTTAAAGTTACAGT  
GATCTATGATCAGCAGCCTGAGTTGACAGGGAGGACCTTGTCTCAAAAGAAAAAATAA  
GACAAAACAGCTAAACCCAGGCTTT

>141

CTTGGGAGGCCGAGGCGAGAGGATGGCTTGGGCCCAGGAGTTTAAAGTTACAGTGAT  
CTATGATCAGCAGCCTGAGTTGACAGGGAGGACCTTGTCTCAAAAGAAAAAATAAGA  
CAAAACAGCTAAACCCAGGCTTTATG

>142

AGAGGATGGCTTGGGCCCAGGAGTTTAAAGTTACAGTGATCTATGATCAGCAGCCTGA  
GTTGACAGGGAGGACCTTGTCTCAAAAGAAAAAATAAGACAAAACAGCTAAACCCAG  
GCTTTATGTGTTGCTAGGGAAACTA

>143

AAAGTTACAGTGATCTATGATCAGCAGCCTGAGTTGACAGGGAGGACCTTGTCTCAAA  
AGAAAAAATAAGACAAAACAGCTAAACCCAGGCTTTATGTGTTGCTAGGGAAACTAGT  
GAACAATATGAATGAATGTTTCATT

>144

GTGATCTATGATCAGCAGCCTGAGTTGACAGGGAGGACCTTGTCTCAAAAGAAAAAAT  
AAGACAAAACAGCTAAACCCAGGCTTTATGTGTTGCTAGGGAACTAGTGAACAATAT  
GAATGAATGTTTCATTGCTTGTGCC

>145

ATCAGCAGCCTGAGTTGACAGGGAGGACCTTGTCTCAAAAGAAAAAATAAGACAAAA  
CAGCTAAACCCAGGCTTTATGTGTTGCTAGGGAACTAGTGAACAATATGAATGAATGT  
TCATTGCTTGTGCCAAGGCACAGA

>146

ACAGGGAGGACCTTGTCTCAAAAGAAAAAATAAGACAAAACAGCTAAACCCAGGCTT  
TATGTGTTGCTAGGGAACTAGTGAACAATATGAATGAATGTTTCATTGCTTGTGCCAAG  
GCACAGACAAATGGACTGGTCATA

>147

AACCCAGGCTTTATGTGTTGCTAGGGAACTAGTGAACAATATGAATGAATGTTTCATTG  
CTTGTGCCAAGGCACAGACAAATGGACTGGTCATAGAAAAGACTGAGGTGATGTTAGT  
GCAGGAATCTATATCCCTTGAGA

>148

GGCTTTATGTGTTGCTAGGGAACTAGTGAACAATATGAATGAATGTTTCATTGCTTGTG  
CCAAGGCACAGACAAATGGACTGGTCATAGAAAAGACTGAGGTGATGTTAGTGCAGG  
AATCTATATCCCTTGAGATTGTTT

>149

TAGTGAACAATATGAATGAATGTTTCATTGCTTGTGCCAAGGCACAGACAAATGGACTG  
GTCATAGAAAAGACTGAGGTGATGTTAGTGCAGGAATCTATATCCCTTGAGATTGTTTG  
CCTGTATGTACCTGTGTGCATTT

>150

TGAATGTTTCATTGCTTGTGCCAAGGCACAGACAAATGGACTGGTCATAGAAAAGACTG  
AGGTGATGTTAGTGCAGGAATCTATATCCCTTGAGATTGTTTGCCTGTATGTACCTGTGT  
GCATTTTCTGGGAGAAGAAAAG

>151

GTTTCATTGCTTGTGCCAAGGCACAGACAAATGGACTGGTCATAGAAAAGACTGAGGTG  
ATGTTAGTGCAGGAATCTATATCCCTTGAGATTGTTTGCCTGTATGTACCTGTGTGCATTT  
TCTGGGAGAAGAAAAGCTCTT

>152

GGCACAGACAAATGGACTGGTCATAGAAAAGACTGAGGTGATGTTAGTGCAGGAATCT  
ATATCCCTTGAGATTGTTTGCCTGTATGTACCTGTGTGCATTTTCTGGGAGAAGAAAAG  
CTCTTTCTTGTGCAGTTTTCAA

>153

GATGTTAGTGCAGGAATCTATATCCCTTGAGATTGTTTGCCTGTATGTACCTGTGTGCAT  
TTTCTGGGAGAAGAAAAGCTCTTTCTTGTGCAGTTTTCAAAGAGGTGTGACACATCCC  
CCTGACCTTCCAAAGATAATAA

>154

GTTAGTGCAGGAATCTATATCCCTTGAGATTGTTTGCCTGTATGTACCTGTGTGCATTTT  
CTGGGAGAAGAAAAGCTCTTTCTTGTGCAGTTTTCAAAGAGGTGTGACACATCCCCCT  
GACCTTCCAAAGATAATAAATC

>155

CCCTTGAGATTGTTTGCCTGTATGTACCTGTGTGCATTTTCTGGGAGAAGAAAAGCTCT  
TTCTTGTGCAGTTTTCAAAGAGGTGTGACACATCCCCCTGACCTTCCAAAGATAATAAA  
TCTTTGATTTTAATTAGAAAAGT

>156

CTGGGAGAAGAAAAGCTCTTTCTTGTGCAGTTTTCAAAGAGGTGTGACACATCCCCCT  
GACCTTCCAAAGATAATAAATCTTTGATTTTAATTAGAAAAGTTGACATATATCCCATATAT  
TTGATCCAGAAAGAAGATCCA

>157

TGCAGTTTTCAAAGAGGTGTGACACATCCCCCTGACCTTCCAAAGATAATAAATCTTTG  
ATTTTAATTAGAAAAGTTGACATATATCCCATATATTTGATCCAGAAAGAAGATCCAGAGG  
AAAGAGGACAGAATCAGAGCT

>158

GACCTTCCAAAGATAATAAATCTTTGATTTTAATTAGAAAAGTTGACATATATCCCATATAT  
TTGATCCAGAAAGAAGATCCAGAGGAAAGAGGACAGAATCAGAGCTTGGGGAGGAG  
ATGAGCATGGAGAGAACTGGGAA

>159

TTCCAAAGATAATAAATCTTTGATTTTAATTAGAAAAGTTGACATATATCCCATATATTTGA  
TCCAGAAAGAAGATCCAGAGGAAAGAGGACAGAATCAGAGCTTGGGGAGGAGATGA  
GCATGGAGAGAACTGGGAATAGG

>160

TCTTTGATTTTAATTAGAAAAGTTGACATATATCCCATATATTTGATCCAGAAAGAAGATCC  
AGAGGAAAGAGGACAGAATCAGAGCTTGGGGAGGAGATGAGCATGGAGAGAACTGG  
GAATAGGAGATTCCAAGGAACAG

>161

CCCATATATTTGATCCAGAAAGAAGATCCAGAGGAAAGAGGACAGAATCAGAGCTTGG  
GGAGGAGATGAGCATGGAGAGAACTGGGAATAGGAGATTCCAAGGAACAGGGCAGGT  
GGATCAGGGCTCAAAGTTGAGAAGG

>162

ATTTGATCCAGAAAGAAGATCCAGAGGAAAGAGGACAGAATCAGAGCTTGGGGAGGA  
GATGAGCATGGAGAGAACTGGGAATAGGAGATTCCAAGGAACAGGGCAGGTGGATCA  
GGGCTCAAAGTTGAGAAGGTACGATA

>163

GAAGATCCAGAGGAAAGAGGACAGAATCAGAGCTTGGGGAGGAGATGAGCATGGAG  
AGAAGTGGGAATAGGAGATTCCAAGGAACAGGGCAGGTGGATCAGGGCTCAAAGTTG  
AGAAGGTACGATAGGCTGAGCTGGAGG

>164

AGGACAGAATCAGAGCTTGGGGAGGAGATGAGCATGGAGAGAACTGGGAATAGGAGA  
TTCCAAGGAACAGGGCAGGTGGATCAGGGCTCAAAGTTGAGAAGGTACGATAGGCTG  
AGCTGGAGGTGGAAAGGAAAAGAAGT

>165

GGAGATGAGCATGGAGAGAACTGGGAATAGGAGATTCCAAGGAACAGGGCAGGTGGA  
TCAGGGCTCAAAGTTGAGAAGGTACGATAGGCTGAGCTGGAGGTGGAAAGGAAAAG  
AAGTGGTCTTCAGGGGGCTCATTGTGA

>166

TGAGCATGGAGAGAACTGGGAATAGGAGATTCCAAGGAACAGGGCAGGTGGATCAGG  
GCTCAAAGTTGAGAAGGTACGATAGGCTGAGCTGGAGGTGGAAAGGAAAAGAAGTG  
GTCTTCAGGGGGCTCATTTGTAATAAC

>167

GAACTGGGAATAGGAGATTCCAAGGAACAGGGCAGGTGGATCAGGGCTCAAAGTTGA  
GAAGGTACGATAGGCTGAGCTGGAGGTGGAAAGGAAAAGAAGTGGTCTTCAGGGGG  
CTCATTTGTAATAACTTACCTGGTTAA

>168

CAAGGAACAGGGCAGGTGGATCAGGGCTCAAAGTTGAGAAGGTACGATAGGCTGAGC  
TGGAGGTGGAAAGGAAAAGAAGTGGTCTTCAGGGGGCTCATTTGTAATAACTTACCTG  
GTTAATCGGAGTCTCTCTACTGACT

>169

ATCAGGGCTCAAAGTTGAGAAGGTACGATAGGCTGAGCTGGAGGTGGAAAGGAAAAG  
AAGTGGTCTTCAGGGGGCTCATTTGTAATAACTTACCTGGTTAATCGGAGTCTCTCTAC  
TGACTTAAGGATTGTGGGATGAGG

>170

CTGGAGGTGGAAAGGAAAAGAAGTGGTCTTCAGGGGGCTCATTTGTAATAACTTACCT  
GGTTAATCGGAGTCTCTCTACTGACTTAAGGATTGTGGGATGAGGGGAATGCTATGTTT  
GGCTTCATATAGTCTCCAGGACT

>171

AGAAGTGGTCTTCAGGGGGCTCATTTGTAATAACTTACCTGGTTAATCGGAGTCTCTCT  
ACTGACTTAAGGATTGTGGGATGAGGGGAATGCTATGTTTGGCTTCATATAGTCTCCAG  
GACTGGTTCAGTATGGGTGGTC

>172

GGGGGCTCATTTGTAATAACTTACCTGGTTAATCGGAGTCTCTCTACTGACTTAAGGATT  
GTGGGATGAGGGGAATGCTATGTTTGGCTTCATATAGTCTCCAGGACTGGTTCAGTATG  
GGTGGTCTGAGCCTGTGGAGT

>173

GTAAATCGGAGTCTCTCTACTGACTTAAGGATTGTGGGATGAGGGGAATGCTATGTTTG  
GCTTCATATAGTCTCCAGGACTGGTTCAGTATGGGTGGTCTGAGCCTGTGGAGTGGGGC  
TGACCCTGCCTGGGTTCATCTT

>174

ACTGACTTAAGGATTGTGGGATGAGGGGAATGCTATGTTTGGCTTCATATAGTCTCCAG  
GACTGGTTCAGTATGGGTGGTCTGAGCCTGTGGAGTGGGGCTGACCCTGCCTGGGTTC  
ATCTTGTGTATCCATCCCGAGGT

>175

GTGGGATGAGGGGAATGCTATGTTTGGCTTCATATAGTCTCCAGGACTGGTTCAGTATG  
GGTGGTCTGAGCCTGTGGAGTGGGGCTGACCCTGCCTGGGTTCATCTTGTGTATCCATC  
CCGAGGTCTTCAAGCCATACCA

>176

GGGGAATGCTATGTTTGGCTTCATATAGTCTCCAGGACTGGTTCAGTATGGGTGGTCTG  
AGCCTGTGGAGTGGGGCTGACCCTGCCTGGGTTCATCTTGTGTATCCATCCCGAGGTCT  
TCAAGCCATACCAGGCCTCCCA

>177

GGTCTGAGCCTGTGGAGTGGGGCTGACCCTGCCTGGGTTCATCTTGTGTATCCATCCCG  
AGGTCTTCAAGCCATACCAGGCCTCCCAGCATGACATGTGCCGCTTCCACTCCGAGGA  
CTACATTGACTTCCTGCAGAGAG

>178

CTGTGGAGTGGGGCTGACCCTGCCTGGGTTCATCTTGTGTATCCATCCCGAGGTCTTCA  
AGCCATACCAGGCCTCCCAGCATGACATGTGCCGCTTCCACTCCGAGGACTACATTGA  
CTTCCTGCAGAGAGTCAGCCCCA

>179

GTGTATCCATCCCGAGGTCTTCAAGCCATACCAGGCCTCCCAGCATGACATGTGCCGCT  
TCCACTCCGAGGACTACATTGACTTCCTGCAGAGAGTCAGCCCCACCAATATGCAAGG  
CTTCACCAAGAGTCTTAATGCCT

>180

CAAGCCATACCAGGCCTCCCAGCATGACATGTGCCGCTTCCACTCCGAGGACTACATT  
GACTTCCTGCAGAGAGTCAGCCCCACCAATATGCAAGGCTTCACCAAGAGTCTTAATG  
CCTTCAACGTAGGCGATGACTGGT

>181

AGCCATACCAGGCCTCCCAGCATGACATGTGCCGCTTCCACTCCGAGGACTACATTGA  
CTTCCTGCAGAGAGTCAGCCCCACCAATATGCAAGGCTTCACCAAGAGTCTTAATGCC  
TTCAACGTAGGCGATGACTGGTGA

>182

GACATGTGCCGCTTCCACTCCGAGGACTACATTGACTTCCTGCAGAGAGTCAGCCCCA  
CCAATATGCAAGGCTTCACCAAGAGTCTTAATGCCTTCAACGTAGGCGATGACTGGTG  
AGGGAGGACTGGGAGTTTTGATGT

>183

GACTTCCTGCAGAGAGTCAGCCCCACCAATATGCAAGGCTTCACCAAGAGTCTTAATG  
CCTTCAACGTAGGCGATGACTGGTGAGGGAGGACTGGGAGTTTTGATGTCTAACAGTT  
TAATGCCAAGCCCTTCAGTGAGGT

>184

GTCAGCCCCACCAATATGCAAGGCTTCACCAAGAGTCTTAATGCCTTCAACGTAGGCG  
ATGACTGGTGAGGGAGGACTGGGAGTTTTGATGTCTAACAGTTAATGCCAAGCCCTT  
CAGTGAGGTCTTTTGGCAGCAGTG

>185

TGCCTTCAACGTAGGCGATGACTGGTGAGGGAGGACTGGGAGTTTTGATGTCTAACAG  
TTTAATGCCAAGCCCTTCAGTGAGGTCTTTTGGCAGCAGTGGAAGATCTCAAGGGGG  
GCCTACTTGTCAATGCATCATAAT

>186

ACGTAGGCGATGACTGGTGAGGGAGGACTGGGAGTTTTGATGTCTAACAGTTTAATGC  
CAAGCCCTTCAGTGAGGTCTTTTGGCAGCAGTGGAAGATCTCAAGGGGGGCCTACTT  
GTCAATGCATCATAATTCATTTTA

>187

GTGAGGGAGGACTGGGAGTTTTGATGTCTAACAGTTTAATGCCAAGCCCTTCAGTGAG  
GTCTTTTGGCAGCAGTGGAAGATCTCAAGGGGGGCCTACTTGTCAATGCATCATAATT  
CATTTTATTTGTTTATTCAATAA

>188

CTACTTGTCAATGCATCATAATTCATTTTATTTGTTTATTCAATAAAATATTTATTGGTCACT  
TGTTCTAGGCAGGCCCTGTGCTAAGTGCTGGGAATGCAGTGATGAACAAAAACAAAAT  
TTTAATATCGTATTTTTGCT

>189

TTGTCAATGCATCATAATTCATTTTATTTGTTTATTCAATAAAATATTTATTGGTCACTTGTT  
CTAGGCAGGCCCTGTGCTAAGTGCTGGGAATGCAGTGATGAACAAAAACAAAATTTTA  
ATATCGTATTTTTGCTAAGT

>190

ATAATTCATTTTATTTGTTTATTCAATAAAATATTTATTGGTCACTTGTTCTAGGCAGGCCCT  
GTGCTAAGTGCTGGGAATGCAGTGATGAACAAAAACAAAATTTTAATATCGTATTTTTG  
CTAAGTCTTATAAAGAGGA

>191

GGCCCTGTGCTAAGTGCTGGGAATGCAGTGATGAACAAAAACAAAATTTTAATATCGTA  
TTTTTGCTAAGTCTTATAAAGAGGAGGTGTATGACAGATTATGAGAGTGTATACGTGGA  
GGATTGTTTAGCTTGGTGGAGT

>192

TAAGTGCTGGGAATGCAGTGATGAACAAAAACAAAATTTTAATATCGTATTTTTGCTAA  
GTCTTATAAAGAGGAGGTGTATGACAGATTATGAGAGTGTATACGTGGAGGATTGTTTA  
GCTTGGTGGAGTGGCTGGTCGG

>193

ACAAAAACAAAATTTTAATATCGTATTTTTGCTAAGTCTTATAAAGAGGAGGTGTATGAC  
AGATTATGAGAGTGTATACGTGGAGGATTGTTTAGCTTGGTGGAGTGGCTGGTCGGTGG  
GGCCTTCCTAGAGGAAGTAAA

>194

TAATATCGTATTTTTGCTAAGTCTTATAAAGAGGAGGTGTATGACAGATTATGAGAGTGT  
ATACGTGGAGGATTGTTTAGCTTGGTGGAGTGGCTGGTCGGTGGGGCCTTCCTAGAGG  
AAGTAAAGATTGAGCTGAGATC

>195

TTTTTGCTAAGTCTTATAAAGAGGAGGTGTATGACAGATTATGAGAGTGTATACGTGGA  
GGATTGTTTAGCTTGGTGGAGTGGCTGGTCGGTGGGGCCTTCCTAGAGGAAGTAAAGA  
TTGAGCTGAGATCTGAAAAAAGA

>196

AGATTATGAGAGTGTATACGTGGAGGATTGTTTAGCTTGGTGGAGTGGCTGGTCGGTGG  
GGCCTTCCTAGAGGAAGTAAAGATTGAGCTGAGATCTGAAAAAAGAGTAGAAGTAATC  
AGATGAAAGATGGTTGGAGGGTG

>197

TGAGAGTGTATACGTGGAGGATTGTTTAGCTTGGTGGAGTGGCTGGTCGGTGGGGCCT  
TCCTAGAGGAAGTAAAGATTGAGCTGAGATCTGAAAAAAGAGTAGAAGTAATCAGATG  
AAAGATGGTTGGAGGGTGAGGGGA

>198

GTGTATACGTGGAGGATTGTTTAGCTTGGTGGAGTGGCTGGTCGGTGGGGCCTTCCTAG  
AGGAAGTAAAGATTGAGCTGAGATCTGAAAAAAGAGTAGAAGTAATCAGATGAAAGA  
TGTTTGGAGGGTGAGGGGAGAAGT



>199

ACGTGGAGGATTGTTTAGCTTGGTGGAGTGGCTGGTCGGTGGGGCCTTCCTAGAGGAA  
GTAAAGATTGAGCTGAGATCTGAAAAAAGAGTAGAAGTAATCAGATGAAAGATGGTTG  
GAGGGTGAGGGGAGAAGTATAGCA

>200

GCTTGGTGGAGTGGCTGGTCGGTGGGGCCTTCCTAGAGGAAGTAAAGATTGAGCTGA  
GATCTGAAAAAAGAGTAGAAGTAATCAGATGAAAGATGGTTGGAGGGTGAGGGGAGA  
AGTATAGCAGGCAGTAGGGACAAGTG

>201

CTAGAGGAAGTAAAGATTGAGCTGAGATCTGAAAAAAGAGTAGAAGTAATCAGATGA  
AAGATGGTTGGAGGGTGAGGGGAGAAGTATAGCAGGCAGTAGGGACAAGTGCTAAGG  
GTCTGTGGTAGGACTGAGTATGACTC

>202

GAAGTAAAGATTGAGCTGAGATCTGAAAAAAGAGTAGAAGTAATCAGATGAAAGATG  
GTTGGAGGGTGAGGGGAGAAGTATAGCAGGCAGTAGGGACAAGTGCTAAGGGTCTGT  
GGTAGGACTGAGTATGACTCATTGGA

>203

AAAGATTGAGCTGAGATCTGAAAAAAGAGTAGAAGTAATCAGATGAAAGATGGTTGG  
AGGGTGAGGGGAGAAGTATAGCAGGCAGTAGGGACAAGTGCTAAGGGTCTGTGGTAG  
GACTGAGTATGACTCATTGAGGAAC

>204

ATCTGAAAAAAGAGTAGAAGTAATCAGATGAAAGATGGTTGGAGGGTGAGGGGAGAA  
GTATAGCAGGCAGTAGGGACAAGTGCTAAGGGTCTGTGGTAGGACTGAGTATGACTCA  
TTTGAGGAACAGAAAAAAGGCCAAG

>205

GAAAGATGGTTGGAGGGTGAGGGGAGAAGTATAGCAGGCAGTAGGGACAAGTGCTAA  
GGGTCTGTGGTAGGACTGAGTATGACTCATTGAGGAACAGAAAAAAGGCCAAGTGC  
AGAGTATGAAGAGGAGGTGAACTGAA

>206

GGTTGGAGGGTGAGGGGAGAAGTATAGCAGGCAGTAGGGACAAGTGCTAAGGGTCTG  
TGGTAGGACTGAGTATGACTCATTGAGGAACAGAAAAAAGGCCAAGTGCAGAGTAT  
GAAGAGGAGGTGAACTGAATTGAGGC

>207

GGAGAAGTATAGCAGGCAGTAGGGACAAGTGCTAAGGGTCTGTGGTAGGACTGAGTAT  
GACTCATTGAGGAACAGAAAAAAGGCCAAGTGCAGAGTATGAAGAGGAGGTGAACT  
GAATTGAGGCTAAAGAAATAGGACC

>208

GTATAGCAGGCAGTAGGGACAAGTGCTAAGGGTCTGTGGTAGGACTGAGTATGACTCA  
TTTGAGGAACAGAAAAAAGGCCAAGTGCAGAGTATGAAGAGGAGGTGAACTGAATTG  
AGGCTAAAGAAATAGGACCTTTTAA

>209

AAGGGTCTGTGGTAGGACTGAGTATGACTCATTGAGGAACAGAAAAAAGGCCAAGT  
GCAGAGTATGAAGAGGAGGTGAACTGAATTGAGGCTAAAGAAATAGGACCTTTTAA  
AGCAAACAGCTCTATTATGAATTGGG

>210

AGTATGACTCATTTGAGGAACAGAAAAAAGGCCAAGTGCAGAGTATGAAGAGGAGGT  
GAACTGAATTGAGGCTAAAGAAATAGGACCTTTTAAAAGCAAACAGCTCTATTATGAAT  
TGGGGTTTTTACCCGTAGAGTATA

>211

CTCATTTGAGGAACAGAAAAAAGGCCAAGTGCAGAGTATGAAGAGGAGGTGAACTGA  
ATTGAGGCTAAAGAAATAGGACCTTTTAAAAGCAAACAGCTCTATTATGAATTGGGGTT  
TTTACCCGTAGAGTATAGGGAAGC

>212

AAAGGCCAAGTGCAGAGTATGAAGAGGAGGTGAACTGAATTGAGGCTAAAGAAATAG  
GACCTTTTAAAAGCAAACAGCTCTATTATGAATTGGGGTTTTTACCCGTAGAGTATAGG  
GAAGCTATCAAAGTGTTTTAAAAA

>213

ATTGAGGCTAAAGAAATAGGACCTTTTAAAAGCAAACAGCTCTATTATGAATTGGGGTT  
TTTACCCGTAGAGTATAGGGAAGCTATCAAAGTGTTTTTAAAAGCAAGGGATCTTAAGA  
GGGCTATGGGCAAGTTAAAAA

>214

TGAGGCTAAAGAAATAGGACCTTTTAAAAGCAAACAGCTCTATTATGAATTGGGGTTTT  
TACCCGTAGAGTATAGGGAAGCTATCAAAGTGTTTTTAAAAGCAAGGGATCTTAAGAG  
GGCTATGGGCAAGTTAAAAAAC

>215

CCTTTTAAAAGCAAACAGCTCTATTATGAATTGGGGTTTTTACCCGTAGAGTATAGGGA  
AGCTATCAAAGTGTTTTTAAAAGCAAGGGATCTTAAGAGGGCTATGGGCAAGTTAAAA  
AAACAAAAAAACAACGAAGGAG

>216

TGAATTGGGGTTTTTACCCGTAGAGTATAGGGAAGCTATCAAAGTGTTTTTAAAAGCAA  
GGGATCTTAAGAGGGCTATGGGCAAGTTAAAAAAACAAAAAAACAACGAAGGAGTG  
GTTTGATATCATTAGGTTTACATT

>217

AATTGGGGTTTTTACCCGTAGAGTATAGGGAAGCTATCAAAGTGTTTTTAAAAGCAAG  
GGATCTTAAGAGGGCTATGGGCAAGTTAAAAAAACAAAAAAACAACGAAGGAGTGG  
TTTGATATCATTAGGTTTACATTGA

>218

ACCCGTAGAGTATAGGGAAGCTATCAAAGTGTTTTTAAAAGCAAGGGATCTTAAGAGG  
GCTATGGGCAAGTTAAAAAAACAAAAAAACAACGAAGGAGTGGTTTGATATCATTAG  
GTTTACATTGAGCTTGTATCATCC

>219

AAGTGTTTTTAAAAGCAAGGGATCTTAAGAGGGCTATGGGCAAGTTAAAAAAACAAA  
AAAAACAACGAAGGAGTGGTTTGATATCATTAGGTTTACATTGAGCTTGTATCATCCAT  
AGAAGAGTCAGGGTTAGACCTCT

>220

GATCTTAAGAGGGCTATGGGCAAGTTAAAAAAACAAAAAAACAACGAAGGAGTGGT  
TTGATATCATTAGGTTTACATTGAGCTTGTATCATCCATAGAAGAGTCAGGGTTAGACCC  
TCTGGGGAAGAGAGTGGACAACA

>221

GCTATGGGCAAGTTAAAAAACAACGAAGGAGTGGTTTGATATCATTAG  
GTTTACATTGAGCTTGTATCATCCATAGAAGAGTCAGGGTTAGACCCTCTGGGGAAGAG  
AGTGGACAACAAAGATAAGCCAC

>222

AAAAACAAAAAACAACGAAGGAGTGGTTTGATATCATTAGGTTTACATTGAGCTTG  
TATCATCCATAGAAGAGTCAGGGTTAGACCCTCTGGGGAAGAGAGTGGACAACAAAGA  
TAAGCCACACTCTACTCTATATCC

>223

TTGATATCATTAGGTTTACATTGAGCTTGTATCATCCATAGAAGAGTCAGGGTTAGACCC  
TCTGGGGAAGAGAGTGGACAACAAAGATAAGCCACACTCTACTCTATATCCATGAAAA  
AATAGTAACCATCACAGCTACC

>224

GATATCATTAGGTTTACATTGAGCTTGTATCATCCATAGAAGAGTCAGGGTTAGACCCTC  
TGGGGAAGAGAGTGGACAACAAAGATAAGCCACACTCTACTCTATATCCATGAAAAA  
TAGTAACCATCACAGCTACCAG

>225

TACATTGAGCTTGTATCATCCATAGAAGAGTCAGGGTTAGACCCTCTGGGGAAGAGAG  
TGGACAACAAAGATAAGCCACACTCTACTCTATATCCATGAAAAAATAGTAACCATCAC  
AGCTACCAGTTGCTCAATTCTAC

>226

TAGACCCTCTGGGGAAGAGAGTGGACAACAAAGATAAGCCACACTCTACTCTATATCC  
ATGAAAAAATAGTAACCATCACAGCTACCAGTTGCTCAATTCTACTTACTTTTGTTTT  
AACTTTTTATTAGGGAAAATTT

>227

GGAAGAGAGTGGACAACAAAGATAAGCCACACTCTACTCTATATCCATGAAAAAATAG  
TAACCATCACAGCTACCAGTTGCTCAATTCTACTTACTTTTGTTTTAACTTTTTATTAG  
GGAAAATTTCAAAAATTTCTG

>228

AGTGGACAACAAAGATAAGCCACACTCTACTCTATATCCATGAAAAAATAGTAACCATC  
ACAGCTACCAGTTGCTCAATTCTACTTACTTTTGTTTTAACTTTTTATTAGGGAAAAT  
TTCAAAAATTTCTGAAAGTGA

>229

AAAAAATAGTAACCATCACAGCTACCAGTTGCTCAATTCTACTTACTTTTGTTTTAAAC  
TTTTTATTAGGGAAAATTTCAAAAATTTCTGAAAGTGAAGTAGTGCAGTGACCTCCCAT  
ACGTCCATCACCTAGCTTCAA

>230

CAGTTGCTCAATTCTACTTACTTTTGTTTTAACTTTTTATTAGGGAAAATTTCAAAAA  
TTTCTGAAAGTGAAGTAGTGCAGTGACCTCCCATACGTCCATCACCTAGCTTCAACGCT  
TATGAGCAAATGGCCACTCTT

>231

GCTCAATTCTACTTACTTTTGTTTTAACTTTTTATTAGGGAAAATTTCAAAAATTTCTG  
AAAGTGAAGTAGTGCAGTGACCTCCCATACGTCCATCACCTAGCTTCAACGCTTATGAG  
CAAATGGCCACTCTTTTTTT

>232

AAAAATTTCTGAAAGTGAAGTAGTGCAGTGACCTCCCATACGTCCATCACCTAGCTTCA  
ACGCTTATGAGCAAATGGCCACTCTTTTTTTTTTTTTTTTTTTTTTTGAGACAGAGTCTCA  
CTCTGTAGCCCAGGCTGGAGT

>233

TACGTCCATCACCTAGCTTCAACGCTTATGAGCAAATGGCCACTCTTTTTTTTTTTTTTT  
TTTTTTTGGAGACAGAGTCTCACTCTGTAGCCCAGGCTGGAGTGCAGTGGTGCAGTCTT  
GGCTCACTGCAACCTCTGCCTC

>234

CAACGCTTATGAGCAAATGGCCACTCTTTTTTTTTTTTTTTTTTTTTTTGAGACAGAGTCT  
CACTCTGTAGCCCAGGCTGGAGTGCAGTGGTGCAGTCTTGGCTCACTGCAACCTCTGC  
CTCCTGGGTTCAAGCGATTCTC

>235

CTTATGAGCAAATGGCCACTCTTTTTTTTTTTTTTTTTTTTTTTGAGACAGAGTCTCACTC  
TGTAGCCCAGGCTGGAGTGCAGTGGTGCAGTCTTGGCTCACTGCAACCTCTGCCTCCT  
GGGTTCAAGCGATTCTCATGCC

>236

CTTTTTTTTTTTTTTTTTTTTTTTGAGACAGAGTCTCACTCTGTAGCCCAGGCTGGAGTGC  
AGTGGTGCAGTCTTGGCTCACTGCAACCTCTGCCTCCTGGGTTCAAGCGATTCTCATGC  
CTCAGACTCCCGAGTAGCTGG

>237

CTCTGTAGCCCAGGCTGGAGTGCAGTGGTGCAGTCTTGGCTCACTGCAACCTCTGCCT  
CCTGGGTTCAAGCGATTCTCATGCCTCAGACTCCCGAGTAGCTGGGATTACAGGCGCC  
TGCCACCATGCCTGGCTAATTTT

>238

GAGTGCAGTGGTGCAGTCTTGGCTCACTGCAACCTCTGCCTCCTGGGTTCAAGCGATT  
CTCATGCCTCAGACTCCCGAGTAGCTGGGATTACAGGCGCCTGCCACCATGCCTGGCTA  
ATTTTTGTATGTTTAGTAGAGAT

>239

CACTGCAACCTCTGCCTCCTGGGTTCAAGCGATTCTCATGCCTCAGACTCCCGAGTAGC  
TGGGATTACAGGCGCCTGCCACCATGCCTGGCTAATTTTTGTATGTTTAGTAGAGATGG  
GGTTTCACTATGTTGGTCAAGC

>240

GCCTCAGACTCCCGAGTAGCTGGGATTACAGGCGCCTGCCACCATGCCTGGCTAATTTT  
TGTATGTTTAGTAGAGATGGGGTTTCACTATGTTGGTCAAGCTGGTTTTGAACTCCCGA  
CCTCAGGTGATTCACCAGCCTC

>241

TCAGACTCCCGAGTAGCTGGGATTACAGGCGCCTGCCACCATGCCTGGCTAATTTTTGT  
ATGTTTAGTAGAGATGGGGTTTCACTATGTTGGTCAAGCTGGTTTTGAACTCCCGACCT  
CAGGTGATTCACCAGCCTCAGC

>242

GGCGCCTGCCACCATGCCTGGCTAATTTTTGTATGTTTAGTAGAGATGGGGTTTCACTAT  
GTTGGTCAAGCTGGTTTTGAACTCCCGACCTCAGGTGATTCACCAGCCTCAGCCTCCA  
AAAGTGCTGGGATTACAGACGT

>243

ATTTTGTATGTTTAGTAGAGATGGGGTTTCACTATGTTGGTCAAGCTGGTTTTGAACTC  
CCGACCTCAGGTGATTCACCAGCCTCAGCCTCCAAAAGTGCTGGGATTACAGACGTGA  
GCCATCGCACTCAGCTGAGCAA

>244

TTAGTAGAGATGGGGTTTCACTATGTTGGTCAAGCTGGTTTTGAACTCCCGACCTCAGG  
TGATTCACCAGCCTCAGCCTCCAAAAGTGCTGGGATTACAGACGTGAGCCATCGCACT  
CAGCTGAGCAAGTGGCCACTCTT

>245

CAAGCTGGTTTTGAACTCCCGACCTCAGGTGATTCACCAGCCTCAGCCTCCAAAAGTG  
CTGGGATTACAGACGTGAGCCATCGCACTCAGCTGAGCAAGTGGCCACTCTTACTTCA  
TCTATACTCCCTCATGTTAGATTG

>246

GTTTTGAACTCCCGACCTCAGGTGATTCACCAGCCTCAGCCTCCAAAAGTGCTGGGAT  
TACAGACGTGAGCCATCGCACTCAGCTGAGCAAGTGGCCACTCTTACTTCATCTATACT  
CCCTCATGTTAGATTGTTTTAAA

>247

GACCTCAGGTGATTCACCAGCCTCAGCCTCCAAAAGTGCTGGGATTACAGACGTGAGC  
CATCGCACTCAGCTGAGCAAGTGGCCACTCTTACTTCATCTATACTCCCTCATGTTAGAT  
TGTTTTAAAGCAGATCCTAGAT

>248

ACAGACGTGAGCCATCGCACTCAGCTGAGCAAGTGGCCACTCTTACTTCATCTATACTC  
CCTCATGTTAGATTGTTTTAAAGCAGATCCTAGATGTTATATCCTTTTATCCATAAATATTT  
TATTATGTATCTCTAAATG

>249

CATCGCACTCAGCTGAGCAAGTGGCCACTCTTACTTCATCTATACTCCCTCATGTTAGAT  
TGTTTTAAAGCAGATCCTAGATGTTATATCCTTTTATCCATAAATATTTTATTATGTATCTC  
TAAATGATACTCTTTTAA

>250

ATGTTATATCCTTTTATCCATAAATATTTTATTATGTATCTCTAAATGATACTCTTTTAAAAA  
AACATAGTATCATTATCAAACCTAAAAAGTTAACAGTGATTCCTTAATGTCATCAAATAT  
GGATCAATATTCAAATT

>251

AATATTTTATTATGTATCTCTAAATGATACTCTTTTAAAAAAACATAGTATCATTATCAAAC  
CTAAAAAGTTAACAGTGATTCCTTAATGTCATCAAATATGGATCAATATTCAAATTTCTG  
CAGTTGTCTCATAATTAT

>252

TATTATGTATCTCTAAATGATACTCTTTTAAAAAAACATAGTATCATTATCAAACCTAAAA  
AGTTAACAGTGATTCCTTAATGTCATCAAATATGGATCAATATTCAAATTTCTGCAGTTG  
TCTCATAATTATTTTGTAG

>253

ATCAAACCTAAAAAGTTAACAGTGATTCCTTAATGTCATCAAATATGGATCAATATTCAA  
ATTTCTGCAGTTGTCTCATAATTATTTTGTAGCTAATTTAAATCCAGATCTAAACAAGGT  
CTATACAGTGCATTTGGTTG

>254

TGATTCCTTAATGTCATCAAATATGGATCAATATTCAAATTTCTGCAGTTGTCTCATAATT  
ATTTTGTAGCTAATTTAAATCCAGATCTAAACAAGGTCTATACAGTGCATTTGGTTGATA  
TGTCTCTTAAGACTTTTAA

>255

ATCAAATATGGATCAATATTCAAATTTCTGCAGTTGTCTCATAATTATTTTGTAGCTAATTT  
AAATCCAGATCTAAACAAGGTCTATACAGTGCATTTGGTTGATATGTCTCTTAAGACTTT  
TAATTTGTAGCTTTTCTG

>256

AAATTTCTGCAGTTGTCTCATAATTATTTTGTAGCTAATTTAAATCCAGATCTAAACAAG  
GTCTATACAGTGCATTTGGTTGATATGTCTCTTAAGACTTTTAATTTGTAGCTTTTCTGTC  
ACCCCTTGAATTTATTC

>257

TTTTGTAGCTAATTTAAATCCAGATCTAAACAAGGTCTATACAGTGCATTTGGTTGATAT  
GTCTCTTAAGACTTTTAATTTGTAGCTTTTCTGTCACCCCTTGAATTTATTTCTTGAAG  
AAACCAGGTTGTTGATCCTG

>258

AAATCCAGATCTAAACAAGGTCTATACAGTGCATTTGGTTGATATGTCTCTTAAGACTTT  
TAATTTGTAGCTTTTCTGTCACCCCTTGAATTTATTTCTTGAAGAAACCAGGTTGTTGA  
TCCTGTAGAATTTCTTATGA

>259

TGGTTGATATGTCTCTTAAGACTTTTAATTTGTAGCTTTTCTGTCACCCCTTGAATTTAT  
TTCTTGAAGAAACCAGGTTGTTGATCCTGTAGAATTTCTTATGATAGCTACCATTACTG  
AGTGCTTACTCTGCTAGGT

>260

TATGTCTCTTAAGACTTTTAATTTGTAGCTTTTCTGTCACCCCTTGAATTTATTTCTTGA  
AGAAACCAGGTTGTTGATCCTGTAGAATTTCTTATGATAGCTACCATTACTGAGTGCTT  
ACTCTGCTAGGTATTATGC

>261

TTCTGTCACCCCTTGAATTTATTTCTTGAAGAAACCAGGTTGTTGATCCTGTAGAATTT  
CTTATGATAGCTACCATTACTGAGTGCTTACTCTGCTAGGTATTATGCCAAGGGTTGCT  
GGTAAATCCACTTAATTCTC

>262

GAATTTATTTCTTGAAGAAACCAGGTTGTTGATCCTGTAGAATTTCTTATGATAGCTACC  
ATTACTGAGTGCTTACTCTGCTAGGTATTATGCCAAGGGTTGCTGGTAAATCCACTTAA  
TTCTCATACCAATCCTTAGA

>263

AGAAACCAGGTTGTTGATCCTGTAGAATTTCTTATGATAGCTACCATTACTGAGTGCTT  
ACTCTGCTAGGTATTATGCCAAGGGTTGCTGGTAAATCCACTTAATTCTCATACCAATCC  
TTAGATGTATTATAATAGAC

>264

GTGCTTACTCTGCTAGGTATTATGCCAAGGGTTGCTGGTAAATCCACTTAATTCTCATAC  
CAATCCTTAGATGTATTATAATAGACCTTTTTCTGATGTTATATATAAGTAAATTGAGGTTT  
GGGAATATCTAGGTAAT

>265

AGGTATTATGCCAAGGGTTGCTGGTAAATCCACTTAATTCTCATACCAATCCTTAGATGT  
ATTATAATAGACCTTTTTCTGATGTTATATATAAGTAAATTGAGGTTTGGAATATCTAGG  
TAACTTAGCCGTAGTCACA

>266

AAATCCACTTAATTCTCATACCAATCCTTAGATGTATTATAATAGACCTTTTTCTGATGTT  
ATATATAAGTAAATTGAGGTTTGGAATATCTAGGTAAGTAACTTAGCCGTAGTCACATAACTG  
GTCATTGGAGGGGGCATGA

>267

TAATTCTCATACCAATCCTTAGATGTATTATAATAGACCTTTTTCTGATGTTATATATAAGT  
AAATTGAGGTTTGGAATATCTAGGTAAGTAACTTAGCCGTAGTCACATAACTGGTCATTGGA  
GGGGGCATGATCCAGATCC

>268

CCTTAGATGTATTATAATAGACCTTTTTCTGATGTTATATATAAGTAAATTGAGGTTTGGA  
AATATCTAGGTAAGTAACTTAGCCGTAGTCACATAACTGGTCATTGGAGGGGGCATGATCCAG  
ATCCCGGGTTTTTAAACCCAC

>269

AATAGACCTTTTTCTGATGTTATATATAAGTAAATTGAGGTTTGGAATATCTAGGTAAGT  
TAGCCGTAGTCACATAACTGGTCATTGGAGGGGGCATGATCCAGATCCCGGGTTTTTAA  
ACCACTAATCTGTTTTCTG

>270

ATATATAAGTAAATTGAGGTTTGGAATATCTAGGTAAGTAACTTAGCCGTAGTCACATAACTG  
GTCATTGGAGGGGGCATGATCCAGATCCCGGGTTTTTAAACCACTAATCTGTTTTCTG  
AAAGATCTTAATGACAGAAGC

>271

TGAGGTTTGGAATATCTAGGTAAGTAACTTAGCCGTAGTCACATAACTGGTCATTGGAGGGG  
GCATGATCCAGATCCCGGGTTTTTAAACCACTAATCTGTTTTCTGAAAGATCTTAATGA  
CAGAAGCAGCCAGGGCTGTAG

>272

ATAACTGGTCATTGGAGGGGGCATGATCCAGATCCCGGGTTTTTAAACCACTAATCTGT  
TTTTCTGAAAGATCTTAATGACAGAAGCAGCCAGGGCTGTAGGATAGAGGCCAACTCA  
TTAGGCTGGCATTGGCACCTTTC

>273

GGAGGGGGCATGATCCAGATCCCGGGTTTTTAAACCACTAATCTGTTTTCTGAAAGAT  
CTTAATGACAGAAGCAGCCAGGGCTGTAGGATAGAGGCCAACTCATTAGGCTGGCATT  
GGCACCTTTCCAACCTTATCCCT

>274

GGGGGCATGATCCAGATCCCGGGTTTTTAAACCACTAATCTGTTTTCTGAAAGATCTT  
AATGACAGAAGCAGCCAGGGCTGTAGGATAGAGGCCAACTCATTAGGCTGGCATTGGC  
ACCTTTCCAACCTTATCCCTACA

>275

ATCCCGGGTTTTTAAACCACTAATCTGTTTTCTGAAAGATCTTAATGACAGAAGCAGC  
CAGGGCTGTAGGATAGAGGCCAACTCATTAGGCTGGCATTGGCACCTTTCCAACCTTAT  
CCCTACACCTCAGCTGCACAGG

>276

TAATCTGTTTTCTGAAAGATCTTAATGACAGAAGCAGCCAGGGCTGTAGGATAGAGG  
CCAACCTCATTAGGCTGGCATTGGCACCTTTCCAACCTTTATCCCTACACCTCAGCTGCAC  
AGGATGCCTTCCTGGAATGCCCT

>277

GGGCTGTAGGATAGAGGCCAACTCATTAGGCTGGCATTGGCACCTTTCCAACCTTTATCC  
CTACACCTCAGCTGCACAGGATGCCTTCCTGGAATGCCCTTAGTTCTCTATTCAACCTC  
TTCAAGGCCTTCTCAGCCTTCA

>278

GGATAGAGGCCAACTCATTAGGCTGGCATTGGCACCTTTCCAACCTTTATCCCTACACCT  
CAGCTGCACAGGATGCCTTCCTGGAATGCCCTTAGTTCTCTATTCAACCTCTTCAAGGC  
CTTCTCAGCCTTCACACCATCT

>279

TATCCCTACACCTCAGCTGCACAGGATGCCTTCCTGGAATGCCCTTAGTTCTCTATTCAA  
CCTCTTCAAGGCCTTCTCAGCCTTCACACCATCTCCATGAAACCTTTCTTGACCACACC  
AGCCCATAGAGCTCTGTCTTG

>280

CCTCAGCTGCACAGGATGCCTTCCTGGAATGCCCTTAGTTCTCTATTCAACCTCTTCAA  
GGCCTTCTCAGCCTTCACACCATCTCCATGAAACCTTTCTTGACCACACCAGCCCATAG  
AGCTCTGTCTTGCACACACTGC

>281

TCTATTCAACCTCTTCAAGGCCTTCTCAGCCTTCACACCATCTCCATGAAACCTTTCTTG  
ACCACACCAGCCCATAGAGCTCTGTCTTGCACACACTGCACTGCTCATTTGGTGTTTCA  
TCACATGCTGTTTGGGGAGGT

>282

AACCTCTTCAAGGCCTTCTCAGCCTTCACACCATCTCCATGAAACCTTTCTTGACCACA  
CCAGCCCATAGAGCTCTGTCTTGCACACACTGCACTGCTCATTTGGTGTTTCAAGTCACAT  
GCTGTTTGGGGAGGTTTCTTGT

>283

AACCTTTCTTGACCACACCAGCCCATAGAGCTCTGTCTTGCACACACTGCACTGCTCAT  
TTGGTGTTTCAAGTCACATGCTGTTTGGGGAGGTTTCTTGTTTTTTTGTAGTATTCCTGCT  
GTTATTTCTGAGCTCACTTTC

>284

AGCCCATAGAGCTCTGTCTTGCACACACTGCACTGCTCATTTGGTGTTTCAAGTCACATGC  
TGTTTGGGGAGGTTTCTTGTTTTTTTGTAGTATTCCTGCTGTTATTTCTGAGCTCACTTT  
CTAGCTCTGTGAATACAGGG

>285

GCACACACTGCACTGCTCATTTGGTGTTTCAAGTCACATGCTGTTTGGGGAGGTTTCTTGT  
TTTTTTGTAGTATTCCTGCTGTTATTTCTGAGCTCACTTTCTAGCTCTGTGAATACAGG  
GTCAGCCCTTACGCCACACTG

>286

GGTGTTTCAAGTCACATGCTGTTTGGGGAGGTTTCTTGTTTTTTTGTAGTATTCCTGCTGT  
TATTTCTGAGCTCACTTTCTAGCTCTGTGAATACAGGGTCAGCCCTTACGCCACACTGG  
GGTCCCGTAGATGCTCTTTGT



>287

CATGCTGTTTGGGGAGGTTTCTTGTTTTTTTGTAGTATTCCTGCTGTTATTTCTGAGCTC  
ACTTTCTAGCTCTGTGAATACAGGGTCAGCCCTTACGCCACACTGGGGTCCCGTAGATG  
CTCTTTGTGCGATTAGGGAA

>288

AGGTTTCTTGTTTTTTTGTAGTATTCCTGCTGTTATTTCTGAGCTCACTTTCTAGCTCTG  
TGAATACAGGGTCAGCCCTTACGCCACACTGGGGTCCCGTAGATGCTCTTTGTGCGATT  
AGGGAATGCTAATTAGAATA

>289

TTATTTCTGAGCTCACTTTCTAGCTCTGTGAATACAGGGTCAGCCCTTACGCCACACTG  
GGGTCCCGTAGATGCTCTTTGTGCGATTAGGGAATGCTAATTAGAATACTATCTCTGGGC  
TATTTATGCTGCATCAGTCTT

>290

CTAGCTCTGTGAATACAGGGTCAGCCCTTACGCCACACTGGGGTCCCGTAGATGCTCTT  
TGTGCGATTAGGGAATGCTAATTAGAATACTATCTCTGGGCTATTTATGCTGCATCAGTC  
TTCCTGTCAAACAAGTTACAG

>291

ACAGGGTCAGCCCTTACGCCACACTGGGGTCCCGTAGATGCTCTTTGTGCGATTAGGG  
AATGCTAATTAGAATACTATCTCTGGGCTATTTATGCTGCATCAGTCTTCCTGTCAAACA  
AGTTACAGTTGTGCTTATCTGT

>292

GTAGATGCTCTTTGTGCGATTAGGGAATGCTAATTAGAATACTATCTCTGGGCTATTTATG  
CTGCATCAGTCTTCCTGTCAAACAAGTTACAGTTGTGCTTATCTGTATTTCCGATGAGAA  
TCAGGAATTTTTCTTCTGT

>293

GATTAGGGAATGCTAATTAGAATACTATCTCTGGGCTATTTATGCTGCATCAGTCTTCCTG  
TCAAACAAGTTACAGTTGTGCTTATCTGTATTTCCGATGAGAATCAGGAATTTTTCTTCT  
GTTTAATGAATTTCTGATT

>294

GGGCTATTTATGCTGCATCAGTCTTCCTGTCAAACAAGTTACAGTTGTGCTTATCTGTAT  
TTCCGATGAGAATCAGGAATTTTTCTTCTGTTTAATGAATTTCTGATTGGTTTCAAAGTA  
TTCTAACATAAGTAGCCAAA

>295

TTTATGCTGCATCAGTCTTCCTGTCAAACAAGTTACAGTTGTGCTTATCTGTATTTCCGA  
TGAGAATCAGGAATTTTTCTTCTGTTTAATGAATTTCTGATTGGTTTCAAAGTATTCTAA  
CATAAGTAGCCAAATTGTAC

>296

GCTTATCTGTATTTCCGATGAGAATCAGGAATTTTTCTTCTGTTTAATGAATTTCTGATTG  
GTTTCAAAGTATTCTAACATAAGTAGCCAAATTGTACTATAGGCCTTTAAATGAAAAAA  
ATAAAAAAGTAGTCCCAAGC

>297

CCGATGAGAATCAGGAATTTTTCTTCTGTTTAATGAATTTCTGATTGGTTTCAAAGTATT  
CTAACATAAGTAGCCAAATTGTACTATAGGCCTTTAAATGAAAAAAATAAAAAAGTAGT  
CCCAAGCCGGGCGCAGTGGCT

>298

ATGAGAATCAGGAATTTTCTTCTGTTTAATGAATTTCTGATTGGTTTCAAAGTATTCTA  
ACATAAGTAGCCAAATTGTACTATAGGCCTTTAAATGAAAAAAATAAAAAAGTAGTCCC  
AAGCCGGGCGCAGTGGCTCAC

>299

TTTCTTCTGTTTAATGAATTTCTGATTGGTTTCAAAGTATTCTAACATAAGTAGCCAAATT  
GTACTATAGGCCTTTAAATGAAAAAAATAAAAAAGTAGTCCCAAGCCGGGCGCAGTGG  
CTCACGCCTGTAATCCCAGCA

>300

TGGTTTCAAAGTATTCTAACATAAGTAGCCAAATTGTACTATAGGCCTTTAAATGAAAA  
AAATAAAAAAGTAGTCCCAAGCCGGGCGCAGTGGCTCACGCCTGTAATCCCAGCACTT  
TCGGAGGCCGAGGCGGGTGGACC

>301

ATAAGTAGCCAAATTGTACTATAGGCCTTTAAATGAAAAAAATAAAAAAGTAGTCCCAA  
GCCGGGCGCAGTGGCTCACGCCTGTAATCCCAGCACTTTCGGAGGCCGAGGCGGGTG  
GACCACCTAAGGTCAGGAGTTCAA

>302

AGGCCTTTAAATGAAAAAAATAAAAAAGTAGTCCCAAGCCGGGCGCAGTGGCTCACG  
CCTGTAATCCCAGCACTTTCGGAGGCCGAGGCGGGTGGACCACCTAAGGTCAGGAGTT  
CAAGACCAGCCTGGCCAACATGGTG

>303

TGAAAAAAATAAAAAAGTAGTCCCAAGCCGGGCGCAGTGGCTCACGCCTGTAATCCC  
AGCACTTTCGGAGGCCGAGGCGGGTGGACCACCTAAGGTCAGGAGTTCAAGACCAGC  
CTGGCCAACATGGTGAAACCCCATCT

>304

GGGCGCAGTGGCTCACGCCTGTAATCCCAGCACTTTCGGAGGCCGAGGCGGGTGGAC  
CACCTAAGGTCAGGAGTTCAAGACCAGCCTGGCCAACATGGTGAAACCCCATCTCTAC  
TAAAAATACAAAATTAGTCATGTG

>305

CGCAGTGGCTCACGCCTGTAATCCCAGCACTTTCGGAGGCCGAGGCGGGTGGACCAC  
CTAAGGTCAGGAGTTCAAGACCAGCCTGGCCAACATGGTGAAACCCCATCTCTACTAA  
AAATACAAAATTAGTCATGTGTGG

>306

GGCTCACGCCTGTAATCCCAGCACTTTCGGAGGCCGAGGCGGGTGGACCACCTAAGGT  
CAGGAGTTCAAGACCAGCCTGGCCAACATGGTGAAACCCCATCTCTACTAAAAATACA  
AAAATTAGTCATGTGTGGTGGCAC

>307

AGGTCAGGAGTTCAAGACCAGCCTGGCCAACATGGTGAAACCCCATCTCTACTAAAAA  
TACAAAATTAGTCATGTGTGGTGGCACGTGCCTGTAGTCCCAGCTACTCCAGGAGGC  
TGAGGCAGGAGAATTGCTTGAACC

>308

CCAACATGGTGAAACCCCATCTCTACTAAAAATACAAAATTAGTCATGTGTGGTGGCA  
CGTGCTGTAGTCCCAGCTACTCCAGGAGGCTGAGGCAGGAGAATTGCTTGAACCCG  
GAGTTGGAGGTTGCAGTGACCTG

>309

CCCATCTCTACTAAAAATACAAAATTAGTCATGTGTGGTGGCACGTGCCTGTAGTCCC  
AGCTACTCCAGGAGGCTGAGGCAGGAGAATTGCTTGAACCCGGGAGTTGGAGGTTGC  
AGTGACCTGAGATTGCACCACTGC

>310

AAAATACAAAATTAGTCATGTGTGGTGGCACGTGCCTGTAGTCCCAGCTACTCCAGG  
AGGCTGAGGCAGGAGAATTGCTTGAACCCGGGAGTTGGAGGTTGCAGTGACCTGAGA  
TTGCACCACTGCACTCCAGCCTGGG

>311

ATACAAAATTAGTCATGTGTGGTGGCACGTGCCTGTAGTCCCAGCTACTCCAGGAGG  
CTGAGGCAGGAGAATTGCTTGAACCCGGGAGTTGGAGGTTGCAGTGACCTGAGATTG  
CACCACTGCACTCCAGCCTGGGCAA

>312

GTGGTGGCACGTGCCTGTAGTCCCAGCTACTCCAGGAGGCTGAGGCAGGAGAATTGCT  
TGAACCCGGGAGTTGGAGGTTGCAGTGACCTGAGATTGCACCACTGCACTCCAGCCT  
GGGCAACAGAGTGAGACTCTGTCTT

>313

CCTGTAGTCCCAGCTACTCCAGGAGGCTGAGGCAGGAGAATTGCTTGAACCCGGGAG  
TTGGAGGTTGCAGTGACCTGAGATTGCACCACTGCACTCCAGCCTGGGCAACAGAGT  
GAGACTCTGTCTTAAAAAAAAAAAAA

>314

AGGCAGGAGAATTGCTTGAACCCGGGAGTTGGAGGTTGCAGTGACCTGAGATTGCAC  
CACTGCACTCCAGCCTGGGCAACAGAGTGAGACTCTGTCTTAAAAAAAAAAAAAAAAA  
AAAAATTCCAGACCTCTCCTTTTCAC

>315

TGCTTGAACCCGGGAGTTGGAGGTTGCAGTGACCTGAGATTGCACCACTGCACTCCAG  
CCTGGGCAACAGAGTGAGACTCTGTCTTAAAAAAAAAAAAAAAAAAAAAATTCCAGAC  
CTCTCCTTTTCACCCATAAATCCCT

>316

ACCACTGCACTCCAGCCTGGGCAACAGAGTGAGACTCTGTCTTAAAAAAAAAAAAAAAAA  
AAAAAAATTCCAGACCTCTCCTTTTCACCCATAAATCCCTCTGCCCAGTGACAGCCACT  
TTCAGCTCCTTTCCCCTATGTCTT

>317

TCTGTCTTAAAAAAAAAAAAAAAAAAAAAATTCCAGACCTCTCCTTTTCACCCATAAAT  
CCCTCTGCCCAGTGACAGCCACTTTCAGCTCCTTTCCCCTATGTCTTCTGGTATTACCT  
TTGGATTTCTAAATAATAATAA

>318

TTAAAAAAAAAAAAAAAAAAAAAATTCCAGACCTCTCCTTTTCACCCATAAATCCCTCT  
GCCCAGTGACAGCCACTTTCAGCTCCTTTCCCCTATGTCTTCTGGTATTACCTTTGGAT  
TTCTAAATAATAATAATATTAA

>319

GGTATTTACCTTTGGATTTCTAAATAATAATAATATTGACTGTTATTACTAATCTGTA  
ATCCTTAGGTAATACCTGTTATATACTAGGTACTGTTCTAAGTGCTTTACAGCCATTAGCT  
TATTTAATCTCAACAAC

>320

AAATAATAATAATATTAATTGACTGTTATTACTAATCTGTAATCCTTAGGTAATACCTGTTA  
TATACTAGGTACTGTTCTAAGTGCTTTACAGCCATTAGCTTATTTAATCTCAACAACCCCT  
ATGAAGCAGGGTCTATT

>321

TGTTATTACTAATCTGTAATCCTTAGGTAATACCTGTTATATACTAGGTACTGTTCTAAGT  
GCTTTACAGCCATTAGCTTATTTAATCTCAACAACCCCTATGAAGCAGGGTCTATTATTG  
TGTCCTTTTACCGATGAGG

>322

ACTAATCTGTAATCCTTAGGTAATACCTGTTATATACTAGGTACTGTTCTAAGTGCTTTAC  
AGCCATTAGCTTATTTAATCTCAACAACCCCTATGAAGCAGGGTCTATTATTGTGTCCTT  
TTACCGATGAGGACACTTA

>323

TTATATACTAGGTACTGTTCTAAGTGCTTTACAGCCATTAGCTTATTTAATCTCAACAACC  
CCTATGAAGCAGGGTCTATTATTGTGTCCTTTTACCGATGAGGACACTTAAGCACAGAA  
AGGTTAAACAGTTTGTACAA

>324

GCCATTAGCTTATTTAATCTCAACAACCCCTATGAAGCAGGGTCTATTATTGTGTCCTTTT  
ACCGATGAGGACACTTAAGCACAGAAAGGTTAAACAGTTTGTACAACCTCACTATCAT  
TAGTAGGTGTTAAAGAACCTA

>325

TATTTAATCTCAACAACCCCTATGAAGCAGGGTCTATTATTGTGTCCTTTTACCGATGAG  
GACACTTAAGCACAGAAAGGTTAAACAGTTTGTACAACCTCACTATCATTAGTAGGTGT  
TAAAGAACCTAGGTAGTCTAG

>326

CCTATGAAGCAGGGTCTATTATTGTGTCCTTTTACCGATGAGGACACTTAAGCACAGAA  
AGGTTAAACAGTTTGTACAACCTCACTATCATTAGTAGGTGTTAAAGAACCTAGGTAGT  
CTAGCTCCAGAATCGGTGCTTG

>327

TGTCCTTTTACCGATGAGGACACTTAAGCACAGAAAGGTTAAACAGTTTGTACAACCT  
CACTATCATTAGTAGGTGTTAAAGAACCTAGGTAGTCTAGCTCCAGAATCGGTGCTTGT  
AATCATACTCCCCTCCTGTATTG

>328

CCTTTTACCGATGAGGACACTTAAGCACAGAAAGGTTAAACAGTTTGTACAACCTCAC  
TATCATTAGTAGGTGTTAAAGAACCTAGGTAGTCTAGCTCCAGAATCGGTGCTTGTAAT  
CATACTCCCCTCCTGTATTGTCT

>329

GATGAGGACACTTAAGCACAGAAAGGTTAAACAGTTTGTACAACCTCACTATCATTAGT  
AGGTGTTAAAGAACCTAGGTAGTCTAGCTCCAGAATCGGTGCTTGTAATCATACTCCCC  
TCCTGTATTGTCTCTCATTGCT

>330

AAGGTTAAACAGTTTGTACAACCTCACTATCATTAGTAGGTGTTAAAGAACCTAGGTAG  
TCTAGCTCCAGAATCGGTGCTTGTAATCATACTCCCCTCCTGTATTGTCTCTCATTGCTAT  
TTCTTCGTCTGTCAATTTA

>331

ATCGGTGCTTGTAATCATACTCCCCCTCCTGTATTGTCTCTCATTGCTATTTCTTCGTCTGT  
CAATTTTAGGCATTATCTGTAAAGCTTTTAGTATGGGATATGAGCATTTAGTCTTCTTACA  
CCATCACATTGGCTTCCT

>332

CATACTCCCCCTCCTGTATTGTCTCTCATTGCTATTTCTTCGTCTGTCAATTTTAGGCATTAT  
CTGTAAAGCTTTTAGTATGGGATATGAGCATTTAGTCTTCTTACACCATCACATTGGCTT  
CCTTTCCCCCTTCAGCTT

>333

CCCTCCTGTATTGTCTCTCATTGCTATTTCTTCGTCTGTCAATTTTAGGCATTATCTGTAA  
AGCTTTTAGTATGGGATATGAGCATTTAGTCTTCTTACACCATCACATTGGCTTCCTTTCC  
CCTTTCAGCTTCATAGTA

>334

TCTCTCATTGCTATTTCTTCGTCTGTCAATTTTAGGCATTATCTGTAAAGCTTTTAGTATG  
GGATATGAGCATTTAGTCTTCTTACACCATCACATTGGCTTCCTTTCCCCCTTCAGCTTC  
ATAGTAATTTAAAAATAAA

>335

AAGCTTTTAGTATGGGATATGAGCATTTAGTCTTCTTACACCATCACATTGGCTTCCTTT  
CCCCCTTCAGCTTCATAGTAATTTAAAAATAAATCAGTATTCTGTGTTTACATTATTATAA  
CTCTGAAAGATTCATTAC

>336

AGTATGGGATATGAGCATTTAGTCTTCTTACACCATCACATTGGCTTCCTTTCCCCCTTC  
AGCTTCATAGTAATTTAAAAATAAATCAGTATTCTGTGTTTACATTATTATAACTCTGAAA  
GATTCATTTACTATCAAGC

>337

TAGTCTTCTTACACCATCACATTGGCTTCCTTTCCCCCTTCAGCTTCATAGTAATTTAAA  
AATAAATCAGTATTCTGTGTTTACATTATTATAACTCTGAAAGATTCATTTACTATCAAGC  
CAAATAGTGTAGTGTGATT

>338

CCCCCTTCAGCTTCATAGTAATTTAAAAATAAATCAGTATTCTGTGTTTACATTATTATAA  
CTCTGAAAGATTCATTTACTATCAAGCCAAATAGTGTAGTGTGATTAAATCTATTTTCTTC  
TAAAGCTTTTTGTTTTTC

>339

GTAATTTAAAAATAAATCAGTATTCTGTGTTTACATTATTATAACTCTGAAAGATTCATTT  
ACTATCAAGCCAAATAGTGTAGTGTGATTAAATCTATTTTCTTCTAAAGCTTTTTGTTTTT  
CCTGGAGCTGACAATTGC

>340

ATAACTCTGAAAGATTCATTTACTATCAAGCCAAATAGTGTAGTGTGATTAAATCTATTTT  
CTTCTAAAGCTTTTTGTTTTTCCTGGAGCTGACAATTGCATTATTTTTTCATTTGCTTAGT  
TTTCTGGTATTAATCACT

>341

TTACTATCAAGCCAAATAGTGTAGTGTGATTAAATCTATTTTCTTCTAAAGCTTTTTGTTT  
TTCTGGAGCTGACAATTGCATTATTTTTTCATTTGCTTAGTTTTCTGGTATTAATCACTA  
ATTCTTTCCAAGCCTTTT

>342

AATCTATTTTCTTCTAAAGCTTTTTGTTTTTCCTGGAGCTGACAATTGCATTATTTTTTCA  
TTTGCTTAGTTTTCTGGTATTAATCACTAATTCTTTCCAAGCCTTTTGAGAACTGTAAA  
ACCCTACAATTCTTGCTTG

>343

CTGGAGCTGACAATTGCATTATTTTTTCATTTGCTTAGTTTTCTGGTATTAATCACTAATT  
CTTTCCAAGCCTTTTGAGAACTGTAAAACCCTACAATTCTTGCTTGAACCCGGGAGG  
CGGAGGCTGCAGTGAGCCGAG

>344

ACAATTGCATTATTTTTTCATTTGCTTAGTTTTCTGGTATTAATCACTAATTCTTTCCAAG  
CCTTTTGAGAACTGTAAAACCCTACAATTCTTGCTTGAACCCGGGAGGCGGAGGCTG  
CAGTGAGCCGAGATCGCACCA

>345

TTAATCACTAATTCTTTCCAAGCCTTTTGAGAACTGTAAAACCCTACAATTCTTGCTTG  
AACCCGGGAGGCGGAGGCTGCAGTGAGCCGAGATCGCACCATTTGCACCCCAGCCTGG  
GCGACAGAGCAAGACCCCATCTC

>346

ACTAATTCTTTCCAAGCCTTTTGAGAACTGTAAAACCCTACAATTCTTGCTTGAACCC  
GGGAGGCGGAGGCTGCAGTGAGCCGAGATCGCACCATTTGCACCCCAGCCTGGGCGAC  
AGAGCAAGACCCCATCTCAAAAAA

>347

CCCTACAATTCTTGCTTGAACCCGGGAGGCGGAGGCTGCAGTGAGCCGAGATCGCACCC  
ATTGCACCCCAGCCTGGGCGACAGAGCAAGACCCCATCTCAAAAAACAAACAAACAA  
AAAACCCCTACAGTTCTGTTTTTCA

>348

TGCTTGAACCCGGGAGGCGGAGGCTGCAGTGAGCCGAGATCGCACCATTTGCACCCCA  
GCCTGGGCGACAGAGCAAGACCCCATCTCAAAAAACAAACAAACAAAAAACCCCTAC  
AGTTCTGTTTTTACATGGTCAAATG

>349

AACCCGGGAGGCGGAGGCTGCAGTGAGCCGAGATCGCACCATTTGCACCCCAGCCTGG  
GCGACAGAGCAAGACCCCATCTCAAAAAACAAACAAACAAAAAACCCCTACAGTTCT  
GTTTTTACATGGTCAAATGTATCAG

>350

ATTGCACCCCAGCCTGGGCGACAGAGCAAGACCCCATCTCAAAAAACAAACAAACAA  
AAAACCCCTACAGTTCTGTTTTTACATGGTCAAATGTATCAGCTGCACTATTTTTTTT  
TTTGAGACCTAAAACTAGGGATT

>351

ACCCCATCTCAAAAAACAAACAAACAAAAAACCCCTACAGTTCTGTTTTTACATGGT  
CAAATGTATCAGCTGCACTATTTTTTTTTTTGAGACCTAAAACTAGGGATTGCCTAAGC  
CTTTCCTTTTTAAAAAGTCAGG

>352

ACAAAAAACCCCTACAGTTCTGTTTTTACATGGTCAAATGTATCAGCTGCACTATTTTT  
TTTTTTTGAGACCTAAAACTAGGGATTGCCTAAGCCTTTCCTTTTTAAAAAGTCAGGTT  
TATATAGGTATAACTTGCATA

>353

TACAGTTCTGTTTTTACATGGTCAAATGTATCAGCTGCACTATTTTTTTTTTTGAGAC  
CTAAAACTAGGGATTGCCTAAGCCTTTCCTTTTTTAAAAAGTCAGGTTTATATAGGTATAA  
CTTGATACAGTAAAATTAA

>354

TTTCACATGGTCAAATGTATCAGCTGCACTATTTTTTTTTTTGAGACCTAAAACTAGGG  
ATTGCCTAAGCCTTTCCTTTTTTAAAAAGTCAGGTTTATATAGGTATAACTTGCATACAGT  
AAAATTAACCTTTTTTAGGT

>355

ATCAGCTGCACTATTTTTTTTTTTGAGACCTAAAACTAGGGATTGCCTAAGCCTTTCCT  
TTTTTAAAAAGTCAGGTTTATATAGGTATAACTTGCATACAGTAAAATTAACCTTTTTTAG  
GTGTAAGAGTTCTGAGAGGT

>356

TAAAACTAGGGATTGCCTAAGCCTTTCCTTTTTTAAAAAGTCAGGTTTATATAGGTATAAC  
TTGCATACAGTAAAATTAACCTTTTTTAGGTGTAAGAGTTCTGAGAGGTTTGATAGAATA  
TATCAAGGTATAGGGCCAGC

>357

AGCCTTTCCTTTTTTAAAAAGTCAGGTTTATATAGGTATAACTTGCATACAGTAAAATTAA  
CCTTTTTTAGGTGTAAGAGTTCTGAGAGGTTTGATAGAATATATCAAGGTATAGGGCCA  
GCGCCGATGGCTCACACCTGT

>358

AAAGTCAGGTTTATATAGGTATAACTTGCATACAGTAAAATTAACCTTTTTTAGGTGTAA  
GAGTTCTGAGAGGTTTGATAGAATATATCAAGGTATAGGGCCAGCGCCGATGGCTCACA  
CCTGTAGTCCCAACAATTTGG

>359

AACTTGCATACAGTAAAATTAACCTTTTTTAGGTGTAAGAGTTCTGAGAGGTTTGATAG  
AATATATCAAGGTATAGGGCCAGCGCCGATGGCTCACACCTGTAGTCCCAACAATTTGG  
GAGGCCAAGGCGGGAGGATCAC

>360

CATACAGTAAAATTAACCTTTTTTAGGTGTAAGAGTTCTGAGAGGTTTGATAGAATATAT  
CAAGGTATAGGGCCAGCGCCGATGGCTCACACCTGTAGTCCCAACAATTTGGGAGGCC  
AAGGCGGGAGGATCACTTAGGC

>361

GTAAGAGTTCTGAGAGGTTTGATAGAATATATCAAGGTATAGGGCCAGCGCCGATGGCT  
CACACCTGTAGTCCCAACAATTTGGGAGGCCAAGGCGGGAGGATCACTTAGGCCAG  
GAGTTTGAGACCAGCTTGGGCAAC

>362

AGAATATATCAAGGTATAGGGCCAGCGCCGATGGCTCACACCTGTAGTCCCAACAATTT  
GGGAGGCCAAGGCGGGAGGATCACTTAGGCCAGGAGTTTGAGACCAGCTTGGGCAA  
CATAGTGAGACCCTGTCTCTACAA

>363

ATCAAGGTATAGGGCCAGCGCCGATGGCTCACACCTGTAGTCCCAACAATTTGGGAGG  
CCAAGGCGGGAGGATCACTTAGGCCAGGAGTTTGAGACCAGCTTGGGCAACATAGT  
GAGACCCTGTCTCTACAAAAA

>364

AGGGCCAGCGCCGATGGCTCACACCTGTAGTCCCAACAATTTGGGAGGCCAAGGCGG  
GAGGATCACTTAGGCCAGGAGTTTGAGACCAGCTTGGGCAACATAGTGAGACCCTGT  
CTCTACAAAAAAAAAAAAAAAAAAG

>365

GGCTCACACCTGTAGTCCCAACAATTTGGGAGGCCAAGGCGGGAGGATCACTTAGGCC  
CAGGAGTTTGAGACCAGCTTGGGCAACATAGTGAGACCCTGTCTCTACAAAAAAAAA  
AAAAAAAAAAGGTATCAAGGTACAGG

>366

GCCCAGGAGTTTGAGACCAGCTTGGGCAACATAGTGAGACCCTGTCTCTACAAAAA  
AAAAAAAAAAAAAGGTATCAAGGTACAGGAAATTTCCACTACCCAACAAAGGTCAC  
TCACTCACCCTTTTGTAGTTAATAACTTCTCT

>367

GTTTGAGACCAGCTTGGGCAACATAGTGAGACCCTGTCTCTACAAAAAAAAAAAAA  
AAAAGGTATCAAGGTACAGGAAATTTCCACTACCCAACAAAGGTCACCTCACCCTTTG  
TAGTTAATAACTTCTCTGCAACCTA

>368

GACCCTGTCTCTACAAAAAAAAAAAAAAAAAAGGTATCAAGGTACAGGAAATTTCCA  
CTACCCAACAAAGGTCACCTCACCCTTTTGTAGTTAATAACTTCTCTGCAACCTAGATCC  
AGCCAACCTACTGATAAGATGTCTG

>369

AAAAAAAAAAAAAGGTATCAAGGTACAGGAAATTTCCACTACCCAACAAAGGTCAC  
TCACTCACCCTTTTGTAGTTAATAACTTCTCTGCAACCTAGATCCAGCCAACCTACTGATAAGATG  
TCTGTCCTTGTATTTTCCAGAAT

>370

TACAGGAAATTTCCACTACCCAACAAAGGTCACCTCACCCTTTTGTAGTTAATAACTTCT  
CTGCAACCTAGATCCAGCCAACCTACTGATAAGATGTCTGTCCTTGTATTTTCCAGAATGT  
ACTTAAATGGAGTCATACAGT

>371

AACAAAGGTCACCTCACCCTTTTGTAGTTAATAACTTCTCTGCAACCTAGATCCAGCCAA  
CTACTGATAAGATGTCTGTCCTTGTATTTTCCAGAATGTACTTAAATGGAGTCATACAGT  
AAGTAGGCTTTTGTGTCTGGC

>372

TAGTTAATAACTTCTCTGCAACCTAGATCCAGCCAACCTACTGATAAGATGTCTGTCCTTG  
TATTTTCCAGAATGTACTTAAATGGAGTCATACAGTAAGTAGGCTTTTGTGTCTGGCTTC  
AAGCCTTTACTTTTTATAAA

>373

GCAACCTAGATCCAGCCAACCTACTGATAAGATGTCTGTCCTTGTATTTTCCAGAATGTAC  
TTAAATGGAGTCATACAGTAAGTAGGCTTTTGTGTCTGGCTTCAAGCCTTTACTTTTTAT  
AAAGAATAACAATGGTAATA

>374

CAGCCAACCTACTGATAAGATGTCTGTCCTTGTATTTTCCAGAATGTACTTAAATGGAGTC  
ATACAGTAAGTAGGCTTTTGTGTCTGGCTTCAAGCCTTTACTTTTTATAAAGAATAACAA  
TGGTAATAATTATAGCTGAC



>375

CCAAC TACTGATAAGATGTCTGTCCTTGTATTTTCCAGAATGTACTTAAATGGAGTCATA  
CAGTAAGTAGGCTTTTGTGTCTGGCTTCAAGCCTTTACTTTTTATAAAGAATAACAATG  
GTAATAATTATAGCTGACATT

>376

GTCCTTGTATTTTCCAGAATGTACTTAAATGGAGTCATACAGTAAGTAGGCTTTTGTGTC  
TGGCTTCAAGCCTTTACTTTTTATAAAGAATAACAATGGTAATAATTATAGCTGACATTTA  
TTAAAGGCTGAGCGGATAC

>377

ATGTACTTAAATGGAGTCATACAGTAAGTAGGCTTTTGTGTCTGGCTTCAAGCCTTTACT  
TTTTATAAAGAATAACAATGGTAATAATTATAGCTGACATTTATTAAAGGCTGAGCGGAT  
ACTGTATACTGTGCTACAGG

>378

GTAAGTAGGCTTTTGTGTCTGGCTTCAAGCCTTTACTTTTTATAAAGAATAACAATGGTA  
ATAATTATAGCTGACATTTATTAAAGGCTGAGCGGATACTGTATACTGTGCTACAGGCTT  
TTCGTGGGTATCTCATCAC

>379

GTCTGGCTTCAAGCCTTTACTTTTTATAAAGAATAACAATGGTAATAATTATAGCTGACA  
TTTATTAAAGGCTGAGCGGATACTGTATACTGTGCTACAGGCTTTTCGTGGGTATCTCA  
TCACTGTTTCACATATGTAG

>380

GAATAACAATGGTAATAATTATAGCTGACATTTATTAAAGGCTGAGCGGATACTGTATAC  
TGTGCTACAGGCTTTTCGTGGGTATCTCATCACTGTTTCACATATGTAGGTATACAGTT  
CTTCTTTTAAAATATGTGAC

>381

GCTGAGCGGATACTGTATACTGTGCTACAGGCTTTTCGTGGGTATCTCATCACTGTTTC  
ACATATGTAGGTATACAGTTCTTTCTTTAAAATATGTGACTGAAAAATATTATTGAACATT  
ATGCTAAAATTTGTTACAC

>382

GATACTGTATACTGTGCTACAGGCTTTTCGTGGGTATCTCATCACTGTTTCACATATGTA  
GGTATACAGTTCTTTCTTTAAAATATGTGACTGAAAAATATTATTGAACATTATGCTAAAA  
TTTGTTACACTGAGAAGA

>383

ACAGTTCTTTCTTTAAAATATGTGACTGAAAAATATTATTGAACATTATGCTAAAATTTG  
TTACACTGAGAAGACTTAAGAAAAACAGAGCTCATGTTTTCTTTCAACTGATTTCCCTTT  
TTACATTGTACTTGAGTACCT

>384

GTTCTTTCTTTAAAATATGTGACTGAAAAATATTATTGAACATTATGCTAAAATTTGTTAC  
ACTGAGAAGACTTAAGAAAAACAGAGCTCATGTTTTCTTTCAACTGATTTCCTTTTTAC  
ATTGTACTTGAGTACCTGGA

>385

TATGTGACTGAAAAATATTATTGAACATTATGCTAAAATTTGTTACACTGAGAAGACTTA  
AGAAAAACAGAGCTCATGTTTTCTTTCAACTGATTTCCCTTTTACATTGTACTTGAGTAC  
CTGGAAGCTGCTTGCTTCTT

>386

TGTGACTGAAAAATATTATTGAACATTATGCTAAAATTTGTTACACTGAGAAGACTTAA  
GAAAAACAGAGCTCATGTTTTCTTTCAACTGATTTCCTTTTTACATTGTACTTGAGTACC  
TGGAAGCTGCTTGCTTCTTTC

>387

CTGAGAAGACTTAAGAAAAACAGAGCTCATGTTTTCTTTCAACTGATTTCCTTTTTACA  
TTGTACTTGAGTACCTGGAAGCTGCTTGCTTCTTTCCGCAGCTTAGGATACAAACTCCC  
TGACAGTTAAGTGCTTCTTTAC

>388

TTAAGAAAAACAGAGCTCATGTTTTCTTTCAACTGATTTCCTTTTTACATTGTACTTGAG  
TACCTGGAAGCTGCTTGCTTCTTTCCGCAGCTTAGGATACAAACTCCCTGACAGTTAAG  
TGCTTCTTTACTTCCCATCCA

>389

GTTTTCTTTCAACTGATTTCCTTTTTACATTGTACTTGAGTACCTGGAAGCTGCTTGCTT  
CTTTCCGCAGCTTAGGATACAAACTCCCTGACAGTTAAGTGCTTCTTTACTTCCCATCC  
AGTGCTTGACACAGGGCTTGG

>390

CTTTCAACTGATTTCCTTTTTACATTGTACTTGAGTACCTGGAAGCTGCTTGCTTCTTTC  
CGCAGCTTAGGATACAAACTCCCTGACAGTTAAGTGCTTCTTTACTTCCCATCCAGTGC  
CTTGACACAGGGCTTGGTACAT

>391

TGCTTGCTTCTTTCCGCAGCTTAGGATACAAACTCCCTGACAGTTAAGTGCTTCTTTAC  
TTCCCATCCAGTGCTTGACACAGGGCTTGGTACATGGTTTGGTCCAAAATATTTGTTGA  
ATAAATTTGCAGATAGCCACG

>392

TCCGCAGCTTAGGATACAAACTCCCTGACAGTTAAGTGCTTCTTTACTTCCCATCCAGT  
GCCTTGACACAGGGCTTGGTACATGGTTTGGTCCAAAATATTTGTTGAATAAATTTGCAG  
ATAGCCACGTGTGTAGGAGAG

>393

TCCCATCCAGTGCTTGACACAGGGCTTGGTACATGGTTTGGTCCAAAATATTTGTTGAA  
TAAATTTGCAGATAGCCACGTGTGTAGGAGAGGGAGAGAAGGTTCTTGAAAAATGGA  
GATTGGAGGAATCTAGGATGGGG

>394

ATCCAGTGCCTTGACACAGGGCTTGGTACATGGTTTGGTCCAAAATATTTGTTGAATAAA  
TTTGCAGATAGCCACGTGTGTAGGAGAGGGAGAGAAGGTTCTTGAAAAATGGAGATT  
GGAGGAATCTAGGATGGGGAGGG

>395

AGGGCTTGGTACATGGTTTGGTCCAAAATATTTGTTGAATAAATTTGCAGATAGCCAC  
GTGTGTAGGAGAGGGAGAGAAGGTTCTTGAAAAATGGAGATTGGAGGAATCTAGGAT  
GGGGAGGGAGATATGGGAAGGGCC

>396

TATTTGTTGAATAAATTTGCAGATAGCCACGTGTGTAGGAGAGGGAGAGAAGGTTCTT  
GAAAAATGGAGATTGGAGGAATCTAGGATGGGGAGGGAGATATGGGAAGGGCCCAGA  
CAGAGGCAGGAGGGTTCCAACCTG

>397

TGAATAAATTTGCAGATAGCCACGTGTGTAGGAGAGGGAGAGAAGGTTCTTGAAAAA  
TGGAGATTGGAGGAATCTAGGATGGGGAGGGAGATATGGGAAGGGCCCAGACAGAGG  
CAGGAGGGTTCCAACCTGTTCTCT

>398

TTTGCAGATAGCCACGTGTGTAGGAGAGGGAGAGAAGGTTCTTGAAAAATGGAGATT  
GGAGGAATCTAGGATGGGGAGGGAGATATGGGAAGGGCCCAGACAGAGGCAGGAGG  
GTTCCAACCTGTTCTCTTCCCTGCA

>399

CACGTGTGTAGGAGAGGGAGAGAAGGTTCTTGAAAAATGGAGATTGGAGGAATCTAG  
GATGGGGAGGGAGATATGGGAAGGGCCCAGACAGAGGCAGGAGGGTTCCAACCTGTT  
CCTCTTCCCTGCAGCCCAGTGTTC

>400

TCTTGAAAAATGGAGATTGGAGGAATCTAGGATGGGGAGGGAGATATGGGAAGGGCC  
CAGACAGAGGCAGGAGGGTTCCAACCTGTTCTCTTCCCTGCAGCCCAGTGTTCCTCG  
GGCTCTTTGAGTTCTGCTCGCGTTA

>401

GAGGGAGATATGGGAAGGGCCCAGACAGAGGCAGGAGGGTTCCAACCTGTTCTCTT  
CCCTGCAGCCCAGTGTTCCTCGGGCTCTTTGAGTTCTGCTCGCGTTACACAGGCGCATC  
TCTGCAAGGAGCAACCCAGCTGAA

>402

TTCCAACCTGTTCTCTTCCCTGCAGCCCAGTGTTCCTCGGGCTCTTTGAGTTCTGCTC  
GCGTTACACAGGCGCATCTCTGCAAGGAGCAACCCAGCTGAACAACAAGGTGACATA  
GTCCCGAGTCCTGTTCTTCCTTC

>403

CTTCCCTGCAGCCCAGTGTTCCTCGGGCTCTTTGAGTTCTGCTCGCGTTACACAGGCGC  
ATCTCTGCAAGGAGCAACCCAGCTGAACAACAAGGTGACATAGTCCCGAGTCCTGTTC  
TTCCTTTCCTCTGGATCCCTGGA

>404

CGGGCTCTTTGAGTTCTGCTCGCGTTACACAGGCGCATCTCTGCAAGGAGCAACCCAG  
CTGAACAACAAGGTGACATAGTCCCGAGTCCTGTTCTTCCTTTCCTCTGGATCCCTGGA  
CTCGGGATTAAACCCTGATCCTG

>405

TGCTCGCGTTACACAGGCGCATCTCTGCAAGGAGCAACCCAGCTGAACAACAAGGTG  
ACATAGTCCCGAGTCCTGTTCCTTTCCTCTGGATCCCTGGACTCGGGATTAAACCCT  
GATCCTGGGCTCCAGCTTGAGG

>406

TCCCGAGTCCTGTTCCTTTCCTCTGGATCCCTGGACTCGGGATTAAACCCTGATCCT  
GGGCTCCAGCTTGAGGGGTGGGCAGGAAGGACTGTGACTTAGGTGTTTGTCTTTCAG  
ATCTGTGATATTGCCATTAACCT

>407

GTCCTGTTCTTCCTTTCCTCTGGATCCCTGGACTCGGGATTAAACCCTGATCCTGGGCTC  
CCAGCTTGAGGGGTGGGCAGGAAGGACTGTGACTTAGGTGTTTGTCTTTCAGATCTGT  
GATATTGCCATTAACCTGGGCTG

>408

TCCTTTCCTCTGGATCCCTGGACTCGGGATTAAACCCTGATCCTGGGCTCCCAGCTTGA  
GGGGTGGGCAGGAAGGACTGTGACTTAGGTGTTTGTCTTTCAGATCTGTGATATTGCCA  
TTAACTGGGCTGGTGGTCTGCA

>409

AACCCTGATCCTGGGCTCCCAGCTTGAGGGGTGGGCAGGAAGGACTGTGACTTAGGT  
GTTTGTCTTTCAGATCTGTGATATTGCCATTAACTGGGCTGGTGGTCTGCACCATGCCA  
AGAAGTTTGAGGTGAGTGAGGAGG

>410

GACTTAGGTGTTTGTCTTTCAGATCTGTGATATTGCCATTAACTGGGCTGGTGGTCTGCA  
CCATGCCAAGAAGTTTGAGGTGAGTGAGGAGGTGATGGGAAAGACAGTGGCCATCCT  
AGGGTAGGTGTTTAGGATGATGG

>411

TTAGGTGTTTGTCTTTCAGATCTGTGATATTGCCATTAACTGGGCTGGTGGTCTGCACCA  
TGCCAAGAAGTTTGAGGTGAGTGAGGAGGTGATGGGAAAGACAGTGGCCATCCTAGG  
GTAGGTGTTTAGGATGATGGTGG

>412

TCAGATCTGTGATATTGCCATTAACTGGGCTGGTGGTCTGCACCATGCCAAGAAGTTTG  
AGGTGAGTGAGGAGGTGATGGGAAAGACAGTGGCCATCCTAGGGTAGGTGTTTAGGA  
TGATGGTGGGGGGCAGCTGGGAGG

>413

GATCTGTGATATTGCCATTAACTGGGCTGGTGGTCTGCACCATGCCAAGAAGTTTGAGG  
TGAGTGAGGAGGTGATGGGAAAGACAGTGGCCATCCTAGGGTAGGTGTTTAGGATGAT  
GGTGGGGGGCAGCTGGGAGGGGA

>414

TGCCATTAACTGGGCTGGTGGTCTGCACCATGCCAAGAAGTTTGAGGTGAGTGAGGAG  
GTGATGGGAAAGACAGTGGCCATCCTAGGGTAGGTGTTTAGGATGATGGTGGGGGGCA  
GCTGGGAGGGGAATTGCTCTTCTC

>415

GGTGGTCTGCACCATGCCAAGAAGTTTGAGGTGAGTGAGGAGGTGATGGGAAAGACA  
GTGGCCATCCTAGGGTAGGTGTTTAGGATGATGGTGGGGGGCAGCTGGGAGGGGAATT  
GCTCTTCTCTTTATGAGACCACTGT

>416

TGAGTGAGGAGGTGATGGGAAAGACAGTGGCCATCCTAGGGTAGGTGTTTAGGATGAT  
GGTGGGGGGCAGCTGGGAGGGGAATTGCTCTTCTCTTTATGAGACCACTGTCTTGCCA  
TAGGCCTCTGGCTTCTGCTATGTC

>417

GGAGGTGATGGGAAAGACAGTGGCCATCCTAGGGTAGGTGTTTAGGATGATGGTGGGG  
GGCAGCTGGGAGGGGAATTGCTCTTCTCTTTATGAGACCACTGTCTTGCCATAGGCCTC  
TGGCTTCTGCTATGTCAACGACA

>418

CATCCTAGGGTAGGTGTTTAGGATGATGGTGGGGGGCAGCTGGGAGGGGAATTGCTCT  
TCTCTTTATGAGACCACTGTCTTGCCATAGGCCTCTGGCTTCTGCTATGTCAACGACATT  
GTGATTGGCATCCTGGAGCTGC

>419

TAGGATGATGGTGGGGGGCAGCTGGGAGGGGAATTGCTCTTCTCTTTATGAGACCACT  
GTCTTGCCATAGGCCTCTGGCTTCTGCTATGTCAACGACATTGTGATTGGCATCCTGGA  
GCTGCTCAAGTAAGTAGCCCAGG

>420

TGAGACCACTGTCTTGCCATAGGCCTCTGGCTTCTGCTATGTCAACGACATTGTGATTG  
GCATCCTGGAGCTGCTCAAGTAAGTAGCCCAGGAGGAGATGGGGGCAGTTACGGGATT  
CTTGGCTGAGGAGGTCTCTCAGT

>421

TGTCTTGCCATAGGCCTCTGGCTTCTGCTATGTCAACGACATTGTGATTGGCATCCTGG  
AGCTGCTCAAGTAAGTAGCCCAGGAGGAGATGGGGGCAGTTACGGGATTCTTGGCTGA  
GGAGGTCTCTCAGTCTCAACCCT

>422

GGCCTCTGGCTTCTGCTATGTCAACGACATTGTGATTGGCATCCTGGAGCTGCTCAAGT  
AAGTAGCCCAGGAGGAGATGGGGGCAGTTACGGGATTCTTGGCTGAGGAGGTCTCTC  
AGTCTCAACCCTGACCTTGACCTC

>423

CTCTGGCTTCTGCTATGTCAACGACATTGTGATTGGCATCCTGGAGCTGCTCAAGTAAG  
TAGCCCAGGAGGAGATGGGGGCAGTTACGGGATTCTTGGCTGAGGAGGTCTCTCAGTC  
TCAACCCTGACCTTGACCTCCCT

>424

TGGCTTCTGCTATGTCAACGACATTGTGATTGGCATCCTGGAGCTGCTCAAGTAAGTAG  
CCCAGGAGGAGATGGGGGCAGTTACGGGATTCTTGGCTGAGGAGGTCTCTCAGTCTCA  
ACCCTGACCTTGACCTCCCTCCT

>425

TATGTCAACGACATTGTGATTGGCATCCTGGAGCTGCTCAAGTAAGTAGCCCAGGAGG  
AGATGGGGGCAGTTACGGGATTCTTGGCTGAGGAGGTCTCTCAGTCTCAACCCTGACC  
TTGACCTCCCTCCTCCCTGATTAG

>426

TGGCATCCTGGAGCTGCTCAAGTAAGTAGCCCAGGAGGAGATGGGGGCAGTTACGGG  
ATTCTTGGCTGAGGAGGTCTCTCAGTCTCAACCCTGACCTTGACCTCCCTCCTCCCTGA  
TTAGCTTCTCCCAAGTTCTTGATG

>427

TTACGGGATTCTTGGCTGAGGAGGTCTCTCAGTCTCAACCCTGACCTTGACCTCCCTCC  
TCCCTGATTAGCTTCTCCCAAGTTCTTGATGCTTTATTCAGGCTGCCTCTTCCACTGCTG  
CAGATTCCCTACTGCCTGCTC

>428

TTGGCTGAGGAGGTCTCTCAGTCTCAACCCTGACCTTGACCTCCCTCCTCCCTGATTAG  
CTTCTCCCAAGTTCTTGATGCTTTATTCAGGCTGCCTCTTCCACTGCTGCAGATTCCCTA  
CTGCCTGCTCACATTCAGCC

>429

TCCCTCCTCCCTGATTAGCTTCTCCCAAGTTCTTGATGCTTTATTCAGGCTGCCTCTTCC  
ACTGCTGCAGATTCCCTACTGCCTGCTCACATTCAGCCTTCTCTGCATATCCCTCTCCT  
GTCCCTGCCTCTAGCCTCTA

>430

AGTTCTTGATGCTTTATTCAGGCTGCCTCTTCCACTGCTGCAGATTCCCTACTGCCTGCT  
CACATTTACAGCCTTCTCTGCATATCCCTCTCCTGTCCCTGCCTCTAGCCTCTAGGCTGGA  
GCCCCAGTTGCCTTTAGGG

>431

CTGCAGATTCCCTACTGCCTGCTCACATTTACAGCCTTCTCTGCATATCCCTCTCCTGTCC  
CTGCCTCTAGCCTCTAGGCTGGAGCCCCCAGTTGCCTTTAGGGAACTGGTGACATTAA  
GTTTCAGGTGACCAGGGCAGAA

>432

TTCCCTACTGCCTGCTCACATTTACAGCCTTCTCTGCATATCCCTCTCCTGTCCCTGCCTCT  
AGCCTCTAGGCTGGAGCCCCCAGTTGCCTTTAGGGAACTGGTGACATTAAAGTTTCAGG  
TGACCAGGGCAGAAGCAGACT

>433

CTCTCCTGTCCCTGCCTCTAGCCTCTAGGCTGGAGCCCCCAGTTGCCTTTAGGGAACTG  
GTGACATTAAAGTTTCAGGTGACCAGGGCAGAAGCAGACTCTTCACAATTCGAGACCCG  
GTGTTTGAGAGGAGTGGGTTGGG

>434

TGTCCCTGCCTCTAGCCTCTAGGCTGGAGCCCCCAGTTGCCTTTAGGGAACTGGTGACA  
TTAAGTTTCAGGTGACCAGGGCAGAAGCAGACTCTTCACAATTCGAGACCCGGTGTTT  
GAGAGGAGTGGGTTGGGGGGTTC

>435

CTCTAGGCTGGAGCCCCCAGTTGCCTTTAGGGAACTGGTGACATTAAAGTTTCAGGTGA  
CCAGGGCAGAAGCAGACTCTTCACAATTCGAGACCCGGTGTTTGAGAGGAGTGGGTT  
GGGGGGTTCACCTCTAGCTCAGACC

>436

CTGGTGACATTAAAGTTTCAGGTGACCAGGGCAGAAGCAGACTCTTCACAATTCGAGAC  
CCGGTGTTTGAGAGGAGTGGGTTGGGGGGTTCACCTCTAGCTCAGACCCTGGCTTTGG  
CTTCCCTCTAGGTACCACCCTCGG

>437

GGTGACATTAAAGTTTCAGGTGACCAGGGCAGAAGCAGACTCTTCACAATTCGAGACCC  
GGTGTTTGAGAGGAGTGGGTTGGGGGGTTCACCTCTAGCTCAGACCCTGGCTTTGGCT  
TCCCTCTAGGTACCACCCTCGGGT

>438

GGCAGAAGCAGACTCTTCACAATTCGAGACCCGGTGTTTGAGAGGAGTGGGTTGGGG  
GGTTCACTTCTAGCTCAGACCCTGGCTTTGGCTTCCCTCTAGGTACCACCCTCGGGTGC  
TCTACATTGACATTGACATCCACC

>439

CTTCCCTCTAGGTACCACCCTCGGGTGCTCTACATTGACATTGACATCCACCATGGTGGA  
CGGGGTTCAAGAAGCTTTCTACCTCACTGACCGGGTCATGACGGTGTCTTCCACAAA  
TACGGAAATTACTTCTTCCCTGG

>440

CCCTCTAGGTACCACCCTCGGGTGCTCTACATTGACATTGACATCCACCATGGTGACGG  
GGTTCAAGAAGCTTTCTACCTCACTGACCGGGTCATGACGGTGTCTTCCACAAATAC  
GGAAATTACTTCTTCCCTGGCAC

>441

TTCTACCTCACTGACCGGGTCATGACGGTGTCCCTTCCACAAATACGGAAATTACTTCTT  
CCCTGGCACAGGTATGGGAATAGGGATTACTTTCCCTTTGCACCCTTCAGCTCTTTACT  
ATGAGTGCCTCCTTCTCAGCC

>442

GACCGGGTCATGACGGTGTCCCTTCCACAAATACGGAAATTACTTCTTCCCTGGCACAG  
GTATGGGAATAGGGATTACTTTCCCTTTGCACCCTTCAGCTCTTTACTATGAGTGCCTC  
CTTCTCAGCCTTCTAGTCTCAT

>443

TTCTTCCCTGGCACAGGTATGGGAATAGGGATTACTTTCCCTTTGCACCCTTCAGCTCT  
TTACTATGAGTGCCTCCTTCTCAGCCTTCTAGTCTCATCTCAGGTGTCCCCTCCTCAGAG  
AAGCCTTTCCTTACCACTCC

>444

AGGTATGGGAATAGGGATTACTTTCCCTTTGCACCCTTCAGCTCTTTACTATGAGTGCC  
TCCTTCTCAGCCTTCTAGTCTCATCTCAGGTGTCCCCTCCTCAGAGAAGCCTTTCCTTA  
CCTCTCCAGTTATCATAATCA

>445

ACTTTCCCTTTGCACCCTTCAGCTCTTTACTATGAGTGCCTCCTTCTCAGCCTTCTAGT  
CTCATCTCAGGTGTCCCCTCCTCAGAGAAGCCTTTCCTTACCACTCCAGTTATCATAATC  
ACCTCCTTCCCCATTCTCT

>446

CCCTTCAGCTCTTTACTATGAGTGCCTCCTTCTCAGCCTTCTAGTCTCATCTCAGGTGTC  
CCCTCCTCAGAGAAGCCTTTCCTTACCACTCCAGTTATCATAATCACCTCCTTCCCCATT  
CCTCTGTTACATCAGCCTCA

>447

CTTCAGCTCTTTACTATGAGTGCCTCCTTCTCAGCCTTCTAGTCTCATCTCAGGTGTCCC  
CTCCTCAGAGAAGCCTTTCCTTACCACTCCAGTTATCATAATCACCTCCTTCCCCATTCC  
TCTGTTACATCAGCCTCATT

>448

CAGCTCTTTACTATGAGTGCCTCCTTCTCAGCCTTCTAGTCTCATCTCAGGTGTCCCCTC  
CTCAGAGAAGCCTTTCCTTACCACTCCAGTTATCATAATCACCTCCTTCCCCATTCTCT  
GTTACATCAGCCTCATTGTT

>449

CCTCCTTCTCAGCCTTCTAGTCTCATCTCAGGTGTCCCCTCCTCAGAGAAGCCTTTCCTT  
ACCACTCCAGTTATCATAATCACCTCCTTCCCCATTCTCTGTTACATCAGCCTCATTGTT  
TCCCTCAGAACTCACTG

>450

CTCAGAGAAGCCTTTCCTTACCACTCCAGTTATCATAATCACCTCCTTCCCCATTCTCT  
GTTACATCAGCCTCATTGTTTCCCTCAGAACTCACTGCTATTTGTGTTTATTGTGGTT  
TTTTGTTTTGTTTTGTTTAC

>451

TACCACTCCAGTTATCATAATCACCTCCTTCCCCATTCTCTGTTACATCAGCCTCATTGT  
TTCCCTCAGAACTCACTGCTATTTGTGTTTATTGTGGTTTTTTGTTTTGTTTTGTTTAC  
TGCCTCCCTCCTCAT

>452

TTTGTGTTTATTGTGGTTTTTTGTTTTGTTTTGTTTACTGCCTCCCTCCTCCTCATGGCTA  
TTCCCTAAGAATATAAGCGTGGTGGGATATCGTAAATTTCAATTAGTTCCATTTCGTTGCTG  
CATCCCTACTGCCTAGTAC

>453

TATTGTGGTTTTTTGTTTTGTTTTGTTTACTGCCTCCCTCCTCCTCATGGCTATTCCCTAA  
GAATATAAGCGTGGTGGGATATCGTAAATTTCAATTAGTTCCATTTCGTTGCTGCATCCCTA  
CTGCCTAGTACACAGTTGG

>454

ACTGCCTCCCTCCTCCTCATGGCTATTCCCTAAGAATATAAGCGTGGTGGGATATCGTAA  
ATTTCAATTAGTTCCATTTCGTTGCTGCATCCCTACTGCCTAGTACACAGTTGGCTCAGAGT  
GGATCCCCCAAACTATTTG

>455

AAGAATATAAGCGTGGTGGGATATCGTAAATTTCAATTAGTTCCATTTCGTTGCTGCATCCC  
TACTGCCTAGTACACAGTTGGCTCAGAGTGGATCCCCCAAACTATTTGCCCAATGAAT  
GCAAGCTGCAAGAGATTTAGT

>456

TAAGCGTGGTGGGATATCGTAAATTTCAATTAGTTCCATTTCGTTGCTGCATCCCTACTGCC  
TAGTACACAGTTGGCTCAGAGTGGATCCCCCAAACTATTTGCCCAATGAATGCAAGCT  
GCAAGAGATTTAGTGGCTCTA

>457

TGGGATATCGTAAATTTCAATTAGTTCCATTTCGTTGCTGCATCCCTACTGCCTAGTACACA  
GTTGGCTCAGAGTGGATCCCCCAAACTATTTGCCCAATGAATGCAAGCTGCAAGAGA  
TTTAGTGGCTCTAGGGAGTTTA

>458

CATCCCTACTGCCTAGTACACAGTTGGCTCAGAGTGGATCCCCCAAACTATTTGCCCA  
ATGAATGCAAGCTGCAAGAGATTTAGTGGCTCTAGGGAGTTTATGGTGAAGCTACATAG  
ATGGAATGAGAGGCTCCCAGAG

>459

GTACACAGTTGGCTCAGAGTGGATCCCCCAAACTATTTGCCCAATGAATGCAAGCTG  
CAAGAGATTTAGTGGCTCTAGGGAGTTTATGGTGAAGCTACATAGATGGAATGAGAGG  
CTCCCAGAGTGCAGATTGGGGCTG

>460

TGGCTCAGAGTGGATCCCCCAAACTATTTGCCCAATGAATGCAAGCTGCAAGAGATT  
TAGTGGCTCTAGGGAGTTTATGGTGAAGCTACATAGATGGAATGAGAGGCTCCCAGAG  
TGCAGATTGGGGCTGAAACAGCTG

>461

CCCCAAACTATTTGCCCAATGAATGCAAGCTGCAAGAGATTTAGTGGCTCTAGGGAG  
TTTATGGTGAAGCTACATAGATGGAATGAGAGGCTCCCAGAGTGCAGATTGGGGCTGA  
AACAGCTGGGTTGTGGGTGCTTCC

>462

TGAATGCAAGCTGCAAGAGATTTAGTGGCTCTAGGGAGTTTATGGTGAAGCTACATAGA  
TGGAATGAGAGGCTCCCAGAGTGCAGATTGGGGCTGAAACAGCTGGGTTGTGGGTGC  
TTCCCATGTGTGGCTACCAACCACC



>463

AGAGATTTAGTGGCTCTAGGGAGTTTATGGTGAAGCTACATAGATGGAATGAGAGGCTC  
CCAGAGTGCAGATTGGGGCTGAAACAGCTGGGTTGTGGGTGCTTCCCATGTGTGGCTA  
CCACCACCCACTTCCCTACAGGT

>464

TAGGGAGTTTATGGTGAAGCTACATAGATGGAATGAGAGGCTCCCAGAGTGCAGATTG  
GGGCTGAAACAGCTGGGTTGTGGGTGCTTCCCATGTGTGGCTACCACCACCCACTTCC  
CTACAGGTGACATGTATGAAGTCG

>465

CAGCTGGGTTGTGGGTGCTTCCCATGTGTGGCTACCACCACCCACTTCCCTACAGGTG  
ACATGTATGAAGTCGGGGCAGAGAGTGGCCGCTACTACTGTCTGAACGTGCCCCCTGCG  
GGATGGCATTGATGACCAGAGTAA

>466

TGAAGTCGGGGCAGAGAGTGGCCGCTACTACTGTCTGAACGTGCCCCCTGCGGGATGG  
CATTGATGACCAGAGTAAGTACCGAAGTCTTCCCTCTGTTCCCTAGGCCCTTCTTTTT  
CTCCTTGAAATAACCTCTTCTGCC

>467

AAGTCGGGGCAGAGAGTGGCCGCTACTACTGTCTGAACGTGCCCCCTGCGGGATGGCAT  
TGATGACCAGAGTAAGTACCGAAGTCTTCCCTCTGTTCCCTAGGCCCTTCTTTTTCTC  
CTTGAAATAACCTCTTCTGCCTG

>468

TCTGAACGTGCCCCCTGCGGGATGGCATTGATGACCAGAGTAAGTACCGAAGTCTTCCC  
TCTGTTCCCTAGGCCCTTCTTTTTCTCCTTGAAATAACCTCTTCTGCCTGGTATTGTCT  
GCTGTTGGGCCAGTTGTCCTTA

>469

GTTCCCTAGGCCCTTCTTTTTCTCCTTGAAATAACCTCTTCTGCCTGGTATTGTCTGCT  
GTTGGGCCAGTTGTCCTTAAGGATGAATGGCCTTCAGAGGGACCATGAATCTCTGGAA  
ATTGTATGCAACATATCATGTG

>470

CCCTTCTTTTTCTCCTTGAAATAACCTCTTCTGCCTGGTATTGTCTGCTGTTGGGCCAGT  
TGTCCTTAAGGATGAATGGCCTTCAGAGGGACCATGAATCTCTGGAAATTGTATGCAAC  
ATATCATGTGTATGTGCATT

>471

TGAAATAACCTCTTCTGCCTGGTATTGTCTGCTGTTGGGCCAGTTGTCCTTAAGGATGA  
ATGGCCTTCAGAGGGACCATGAATCTCTGGAAATTGTATGCAACATATCATGTGTATGTG  
CATTTTTCTGGGAAAAGTCAT

>472

TCAGAGGGACCATGAATCTCTGGAAATTGTATGCAACATATCATGTGTATGTGCATTTTT  
CTGGGAAAAGTCATTGGCTTTCATCAGTCACTCATAGCAGTCTGGGATCCCTTCCAGAA  
GTTTCAGACCAGTGATTGAT

>473

CTCTGGAAATTGTATGCAACATATCATGTGTATGTGCATTTTTCTGGGAAAAGTCATTGG  
CTTTCATCAGTCACTCATAGCAGTCTGGGATCCCTTCCAGAAGTTTCAGACCAGTGATT  
TGATTCTTTTGGGTGGCCCCT

>474

TGTATGCAACATATCATGTGTATGTGCATTTTTCTGGGAAAAGTCATTGGCTTTCATCAG  
TCACTCATAGCAGTCTGGGATCCCTTCCAGAAGTTTCAGACCAGTGATTTGATTCTTTT  
GGGTGGCCCCTTTCCTGGGCT

>475

ATGCAACATATCATGTGTATGTGCATTTTTCTGGGAAAAGTCATTGGCTTTCATCAGTCA  
CTCATAGCAGTCTGGGATCCCTTCCAGAAGTTTCAGACCAGTGATTTGATTCTTTTGGG  
TGGCCCCTTTCCTGGGCTACA

>476

TATGTGCATTTTTCTGGGAAAAGTCATTGGCTTTCATCAGTCACTCATAGCAGTCTGGG  
ATCCCTTCCAGAAGTTTCAGACCAGTGATTTGATTCTTTTGGGTGGCCCCTTTCCTGGG  
CTACATGCTCGCTCAACCCCCT

>477

CTGGGCTACATGCTCGCTCAACCCCCTTTTTCTTTTGTTCCTGTCTCCCCATCCCCTT  
GGGGTGCCAGGTGCCCATCTTTGGCCCTCTCCCAGGTTACAAGCACCTTTTCCAGCCG  
GTTATCAACCAGGTAGTGGACT

>478

TCTCCCCATCCCCTTGGGGTGCCAGGTGCCCATCTTTGGCCCTCTCCCAGGTTACAAGC  
ACCTTTTCCAGCCGTTATCAACCAGGTAGTGGACTTCTACCAACCCACGTGCATTGTG  
CTCCAGGTAATACTGTCAGTTC

>479

GGGGTGCCAGGTGCCCATCTTTGGCCCTCTCCCAGGTTACAAGCACCTTTTCCAGCCG  
GTTATCAACCAGGTAGTGGACTTCTACCAACCCACGTGCATTGTGCTCCAGGTAATACT  
GTCAGTTCCTCCTCAGGAGTGTT

>480

CAAGCACCTTTTCCAGCCGTTATCAACCAGGTAGTGGACTTCTACCAACCCACGTGC  
ATTGTGCTCCAGGTAATACTGTCAGTTCCTCCTCAGGAGTGTTCTGCCTGGGCTTGGGG  
AAAGAGAGCAAGGGAAGAGGAGG

>481

CAGCCGGTTATCAACCAGGTAGTGGACTTCTACCAACCCACGTGCATTGTGCTCCAGGT  
AATACTGTCAGTTCCTCCTCAGGAGTGTTCTGCCTGGGCTTGGGGAAAGAGAGCAAGG  
GAAGAGGAGGTTCTTTAGGTTGG

>482

CAACCAGGTAGTGGACTTCTACCAACCCACGTGCATTGTGCTCCAGGTAATACTGTCA  
GTTCTCCTCAGGAGTGTTCTGCCTGGGCTTGGGGAAAGAGAGCAAGGGAAGAGGAG  
GTTCTTTAGGTTGGTGGTGGGAAGGG

>483

CACGTGCATTGTGCTCCAGGTAATACTGTCAGTTCCTCCTCAGGAGTGTTCTGCCTGGG  
CTTGGGGAAAGAGAGCAAGGGAAGAGGAGGTTCTTTAGGTTGGTGGTGGGAAGGGGTA  
TCTGTGATGTTCTGATCAGTTCTG

>484

CTCCAGGTAATACTGTCAGTTCCTCCTCAGGAGTGTTCTGCCTGGGCTTGGGGAAAGA  
GAGCAAGGGAAGAGGAGGTTCTTTAGGTTGGTGGTGGGAAGGGGTATCTGTGATGTTCT  
GATCAGTTCTGATCACTGCACTTT

>485

CCAGGTAATACTGTCAGTTCCTCCTCAGGAGTGTTCTGCCTGGGCTTGGGGAAAGAGA  
GCAAGGGAAGAGGAGGTTCTTTAGGTTGGTGGTGGAAGGGGTATCTGTGATGTTCTGA  
TCAGTTCTGATCACTGCACTTTCC

>486

GTCAGTTCCTCCTCAGGAGTGTTCTGCCTGGGCTTGGGGAAAGAGAGCAAGGGAAGA  
GGAGGTTCTTTAGGTTGGTGGTGGAAGGGGTATCTGTGATGTTCTGATCAGTTCTGATC  
ACTGCACTTTCTGGGGTTTTGCT

>487

AGGAGTGTTCTGCCTGGGCTTGGGGAAAGAGAGCAAGGGAAGAGGAGGTTCTTTAGG  
TTGGTGGTGGAAGGGGTATCTGTGATGTTCTGATCAGTTCTGATCACTGCACTTTCTG  
GGTTTTGCTTTTTGCAGTGTGGA

>488

TGGAAGGGGTATCTGTGATGTTCTGATCAGTTCTGATCACTGCACTTTCTGGGGTTTT  
GCTTTTTGCAGTGTGGAGCTGACTCTCTGGGCTGTGATCGATTGGGCTGCTTTAACCTC  
AGCATCCGAGGGCATGGGTGAG

>489

GGTATCTGTGATGTTCTGATCAGTTCTGATCACTGCACTTTCTGGGGTTTTGCTTTTTG  
CAGTGTGGAGCTGACTCTCTGGGCTGTGATCGATTGGGCTGCTTTAACCTCAGCATCCG  
AGGGCATGGGTGAGACTTGCT

>490

TGGGGTTTTGCTTTTTGCAGTGTGGAGCTGACTCTCTGGGCTGTGATCGATTGGGCTGC  
TTTAACCTCAGCATCCGAGGGCATGGGTGAGACTTGCTCTCCTTCTTCTCCCCAAGGTT  
TTTAAGTGGCCTTGGACTIONCAG

>491

TGCTTTTTGCAGTGTGGAGCTGACTCTCTGGGCTGTGATCGATTGGGCTGCTTTAACCT  
CAGCATCCGAGGGCATGGGTGAGACTTGCTCTCCTTCTTCTCCCCAAGGTTTTTAAGTG  
GCCTTGGACTIONCAGTACGTGGG

>492

ATCGATTGGGCTGCTTTAACCTCAGCATCCGAGGGCATGGGTGAGACTTGCTCTCCTTC  
TTCTCCCCAAGGTTTTTAAGTGGCCTTGGACTIONCAGTACGTGGGTGGGGGTAGTTGGG  
GAATGGGCCTCACCTCTTCTTG

>493

GCTGCTTTAACCTCAGCATCCGAGGGCATGGGTGAGACTTGCTCTCCTTCTTCTCCCCA  
AGGTTTTTAAGTGGCCTTGGACTIONCAGTACGTGGGTGGGGGTAGTTGGGGAATGGGCC  
TCACCTCTTCTTGGAATCAAAA

>494

CATCCGAGGGCATGGGTGAGACTTGCTCTCCTTCTTCTCCCCAAGGTTTTTAAGTGGCC  
TTGGACTIONCAGTACGTGGGTGGGGGTAGTTGGGGAATGGGCCTCACCTCTTCTTGAA  
ATCAAAAATAGCTACAAATTGTA

>495

CTTGGACTIONCAGTACGTGGGTGGGGGTAGTTGGGGAATGGGCCTCACCTCTTCTTGGA  
AATCAAAAATAGCTACAAATTGTACTIONGAAATGTCATCTTGAACAGGGTTCCC  
TAGATGGTCATTCAATCACGATA

>496

GGGGTAGTTGGGGAATGGGCCTCACCTCTTCTTGGAATCAAAAATAGCTACAAATTGT  
ACTTGAAGTAGAAATGTCATCTTGAACAGGGTTCCCTAGATGGTCATTCATTCACGATAT  
ATTTTTATTAAGCACCTGTTA

>497

GCCTCACCTCTTCTTGGAATCAAAAATAGCTACAAATTGTACTTGAAGTAGAAATGTC  
ATCTTGAACAGGGTTCCCTAGATGGTCATTCATTCACGATATATTTTTATTAAGCACCTGT  
TATGTTCCAGGCATCATACC

>498

TTCTTGGAATCAAAAATAGCTACAAATTGTACTTGAAGTAGAAATGTCATCTTGAACA  
GGGTTCCCTAGATGGTCATTCATTCACGATATATTTTTATTAAGCACCTGTTATGTTCCAG  
GCATCATACCACATCATGGG

>499

TTGAAGTAGAAATGTCATCTTGAACAGGGTTCCCTAGATGGTCATTCATTCACGATATAT  
TTTTATTAAGCACCTGTTATGTTCCAGGCATCATACCACATCATGGGGATGGAATAAGGA  
GTCTCCCATGGAGTTTACAG

>500

TCTTGAACAGGGTTCCCTAGATGGTCATTCATTCACGATATATTTTTATTAAGCACCTGTT  
ATGTTCCAGGCATCATACCACATCATGGGGATGGAATAAGGAGTCTCCCATGGAGTTTA  
CAGTTTAGGAAACAGACAAA

>501

TTCACGATATATTTTTATTAAGCACCTGTTATGTTCCAGGCATCATACCACATCATGGGGA  
TGAATAAGGAGTCTCCCATGGAGTTTACAGTTTAGGAAACAGACAAAAAATAAATAA  
TCAAATGAAATAAATAGATTC

>502

TATTAAGCACCTGTTATGTTCCAGGCATCATACCACATCATGGGGATGGAATAAGGAGT  
CTCCCATGGAGTTTACAGTTTAGGAAACAGACAAAAAATAAATAATCAAATGAAATAAA  
TAGATTCTTATAAATTCTGTGA

>503

CACCTGTTATGTTCCAGGCATCATACCACATCATGGGGATGGAATAAGGAGTCTCCCAT  
GGAGTTTACAGTTTAGGAAACAGACAAAAAATAAATAATCAAATGAAATAAATAGATTC  
TTATAAATTCTGTGAAAGAAAA

>504

GTTATGTTCCAGGCATCATACCACATCATGGGGATGGAATAAGGAGTCTCCCATGGAGT  
TTACAGTTTAGGAAACAGACAAAAAATAAATAATCAAATGAAATAAATAGATTCTTATA  
AATTCTGTGAAAGAAAAAAGA

>505

TCCAGGCATCATACCACATCATGGGGATGGAATAAGGAGTCTCCCATGGAGTTTACAGT  
TTAGGAAACAGACAAAAAATAAATAATCAAATGAAATAAATAGATTCTTATAAATTCTG  
TGAAAGAAAAAAGAAAGCTGA

>506

TAAGGAGTCTCCCATGGAGTTTACAGTTTAGGAAACAGACAAAAAATAAATAATCAAA  
TGAAATAAATAGATTCTTATAAATTCTGTGAAAGAAAAAAGAAAGCTGAGACACAGG  
ATACAATGGGGGACCTACTTGAGA

>507

ACAGTTTAGGAAACAGACAAAAAATAAATAATCAAATGAAATAAATAGATTCTTATAAA  
TTCTGTGAAAGAAAAAAGAAAGCTGAGACACAGGATACAATGGGGGACCTACTTGA  
GATAGCATGGTTTCGGAAGTTTTT

>508

GGAAACAGACAAAAAATAAATAATCAAATGAAATAAATAGATTCTTATAAATTCTGTGA  
AAGAAAAAAGAAAGCTGAGACACAGGATACAATGGGGGACCTACTTGAGATAGCAT  
GGTTTCGGAAGTTTTTCTGAGGAA

>509

ATAAATAATCAAATGAAATAAATAGATTCTTATAAATTCTGTGAAAGAAAAAAGAAAG  
CTGAGACACAGGATACAATGGGGGACCTACTTGAGATAGCATGGTTTCGGAAGTTTTT  
CTGAGGAAGTAAAATTTGAGTTG

>510

CTTATAAATTCTGTGAAAGAAAAAAGAAAGCTGAGACACAGGATACAATGGGGGAC  
CTACTTGAGATAGCATGGTTTCGGAAGTTTTTCTGAGGAAGTAAAATTTGAGTTGAGAC  
CTGGAGACTAAGAAGGAGTGAGTC

>511

GAAAGAAAAAAGAAAGCTGAGACACAGGATACAATGGGGGACCTACTTGAGATAGC  
ATGGTTTCGGAAGTTTTTCTGAGGAAGTAAAATTTGAGTTGAGACCTGGAGACTAAGA  
AGGAGTGAGTCATAAGAGGAGCAGA

>512

AAGAAAGCTGAGACACAGGATACAATGGGGGACCTACTTGAGATAGCATGGTTTCGGA  
AGTTTTTCTGAGGAAGTAAAATTTGAGTTGAGACCTGGAGACTAAGAAGGAGTGAGT  
CATAAGAGGAGCAGAGAGAAGCCTG

>513

GGGACCTACTTGAGATAGCATGGTTTCGGAAGTTTTTCTGAGGAAGTAAAATTTGAGTT  
GAGACCTGGAGACTAAGAAGGAGTGAGTCATAAGAGGAGCAGAGAGAAGCCTGACC  
CAAGCATGGACAAAGGCCACAAAA

>514

TACTTGAGATAGCATGGTTTCGGAAGTTTTTCTGAGGAAGTAAAATTTGAGTTGAGACC  
TGGAGACTAAGAAGGAGTGAGTCATAAGAGGAGCAGAGAGAAGCCTGACCCAAGCAT  
GGACAAAGGCCACAAAAGGCTCT

>515

TTGAGATAGCATGGTTTCGGAAGTTTTTCTGAGGAAGTAAAATTTGAGTTGAGACCTG  
GAGACTAAGAAGGAGTGAGTCATAAGAGGAGCAGAGAGAAGCCTGACCCAAGCATG  
GACAAAGGCCACAAAAGGCTCTGAG

>516

AGATAGCATGGTTTCGGAAGTTTTTCTGAGGAAGTAAAATTTGAGTTGAGACCTGGAG  
ACTAAGAAGGAGTGAGTCATAAGAGGAGCAGAGAGAAGCCTGACCCAAGCATGGAC  
AAAGGCCACAAAAGGCTCTGAGGGC

>517

TTTCGGAAGTTTTTCTGAGGAAGTAAAATTTGAGTTGAGACCTGGAGACTAAGAAGGA  
GTGAGTCATAAGAGGAGCAGAGAGAAGCCTGACCCAAGCATGGACAAAGGCCACAA  
AAAGGCTCTGAGGGCTGGGCCAGTG

>518

TGAGGAAGTAAAATTTGAGTTGAGACCTGGAGACTAAGAAGGAGTGAGTCATAAGAG  
GAGCAGAGAGAAGCCTGACCCAAGCATGGACAAAGGCCACAAAAGGCTCTGAGGG  
CTGGGCCAGTGGCACACACCTATAAT

>519

CTAAGAAGGAGTGAGTCATAAGAGGAGCAGAGAGAAGCCTGACCCAAGCATGGACA  
AAGGCCACAAAAGGCTCTGAGGGCTGGGCCAGTGGCACACACCTATAATCCCAAC  
ACTTCCAGAGGCCAAGGTGGGAGAATC

>520

GAGTGAGTCATAAGAGGAGCAGAGAGAAGCCTGACCCAAGCATGGACAAAGGCCCA  
CAAAAGGCTCTGAGGGCTGGGCCAGTGGCACACACCTATAATCCCAACACTTCCAGA  
GGCCAAGGTGGGAGAATCGCCTGAGG

>521

AGAGGAGCAGAGAGAAGCCTGACCCAAGCATGGACAAAGGCCACAAAAGGCTCTG  
AGGGCTGGGCCAGTGGCACACACCTATAATCCCAACACTTCCAGAGGCCAAGGTGG  
GAGAATCGCCTGAGGCTAGGAGTTTGA

>522

GGACAAAGGCCACAAAAGGCTCTGAGGGCTGGGCCAGTGGCACACACCTATAATC  
CCAACACTTCCAGAGGCCAAGGTGGGAGAATCGCCTGAGGCTAGGAGTTTGAGGCCA  
GCCTGGGCAACATAGTGAGAGCCATC

>523

GCCCACAAAAGGCTCTGAGGGCTGGGCCAGTGGCACACACCTATAATCCCAACACTT  
CCAGAGGCCAAGGTGGGAGAATCGCCTGAGGCTAGGAGTTTGAGGCCAGCCTGGGCA  
ACATAGTGAGAGCCATCTCTACAGA

>524

AAAGGCTCTGAGGGCTGGGCCAGTGGCACACACCTATAATCCCAACACTTCCAGAGG  
CCAAGGTGGGAGAATCGCCTGAGGCTAGGAGTTTGAGGCCAGCCTGGGCAACATAGT  
GAGAGCCATCTCTACAGAAAATAAA

>525

GGGCTGGGCCAGTGGCACACACCTATAATCCCAACACTTCCAGAGGCCAAGGTGGG  
AGAATCGCCTGAGGCTAGGAGTTTGAGGCCAGCCTGGGCAACATAGTGAGAGCCATCT  
CTACAGAAAATAAAAAACAAAATCA

>526

ACACCTATAATCCCAACACTTCCAGAGGCCAAGGTGGGAGAATCGCCTGAGGCTAGGA  
GTTTGAGGCCAGCCTGGGCAACATAGTGAGAGCCATCTCTACAGAAAATAAAAAACAA  
AATCAGCTGGGCATGATGGTGCAT

>527

TCCAGAGGCCAAGGTGGGAGAATCGCCTGAGGCTAGGAGTTTGAGGCCAGCCTGGGC  
AACATAGTGAGAGCCATCTCTACAGAAAATAAAAAACAAAATCAGCTGGGCATGATGG  
TGCATGCCTATAGTCCTAGCTACTC

>528

GGTGGGAGAATCGCCTGAGGCTAGGAGTTTGAGGCCAGCCTGGGCAACATAGTGAGA  
GCCATCTCTACAGAAAATAAAAAACAAAATCAGCTGGGCATGATGGTGCATGCCTATAG  
TCCTAGCTACTCAGGAAGCTGAGG

>529

CTAGGAGTTTGAGGCCAGCCTGGGCAACATAGTGAGAGCCATCTCTACAGAAAATAAA  
AAACAAAATCAGCTGGGCATGATGGTGCATGCCTATAGTCCTAGCTACTCAGGAAGCT  
GAGGCAGGAGGATCACTTGAGCCT

>530

TGAGAGCCATCTCTACAGAAAATAAAAAACAAAATCAGCTGGGCATGATGGTGCATGC  
CTATAGTCCTAGCTACTCAGGAAGCTGAGGCAGGAGGATCACTTGAGCCTAGGAGTTT  
GAGGTTACAGTGAACCTATGATTGT

>531

ATCTCTACAGAAAATAAAAAACAAAATCAGCTGGGCATGATGGTGCATGCCTATAGTCC  
TAGCTACTCAGGAAGCTGAGGCAGGAGGATCACTTGAGCCTAGGAGTTTGAGGTTACA  
GTGAACCTATGATTGTGCCACTGG

>532

GAAAATAAAAAACAAAATCAGCTGGGCATGATGGTGCATGCCTATAGTCCTAGCTACTC  
AGGAAGCTGAGGCAGGAGGATCACTTGAGCCTAGGAGTTTGAGGTTACAGTGAACCTAT  
GATTGTGCCACTGGACTTCAGTC

>533

GGGCATGATGGTGCATGCCTATAGTCCTAGCTACTCAGGAAGCTGAGGCAGGAGGATC  
ACTTGAGCCTAGGAGTTTGAGGTTACAGTGAACCTATGATTGTGCCACTGGACTTCAGTC  
TGTTGAGGTGAGGTCCGAGAAGC

>534

GCCTATAGTCCTAGCTACTCAGGAAGCTGAGGCAGGAGGATCACTTGAGCCTAGGAGT  
TTGAGGTTACAGTGAACCTATGATTGTGCCACTGGACTTCAGTCTGTTGAGGTGAGGTC  
CGAGAAGCTGGCCATGGTGAAGAT

>535

AGGCAGGAGGATCACTTGAGCCTAGGAGTTTGAGGTTACAGTGAACCTATGATTGTGCC  
ACTGGACTTCAGTCTGTTGAGGTGAGGTCCGAGAAGCTGGCCATGGTGAAGATTGTGC  
ATGAGCCTTTAAACCCTGGTAAGG

>536

GATCACTTGAGCCTAGGAGTTTGAGGTTACAGTGAACCTATGATTGTGCCACTGGACTTC  
AGTCTGTTGAGGTGAGGTCCGAGAAGCTGGCCATGGTGAAGATTGTGCATGAGCCTTT  
AAACCCTGGTAAGGAGTTTGAAT

>537

AGTGAACCTATGATTGTGCCACTGGACTTCAGTCTGTTGAGGTGAGGTCCGAGAAGCTG  
GCCATGGTGAAGATTGTGCATGAGCCTTTAAACCCTGGTAAGGAGTTTGAATTATATTC  
CAAAGATGATGGGAAACCATTGA

>538

TTGTGCCACTGGACTTCAGTCTGTTGAGGTGAGGTCCGAGAAGCTGGCCATGGTGAAG  
ATTGTGCATGAGCCTTTAAACCCTGGTAAGGAGTTTGAATTATATTCCAAAGATGATGG  
GAAACCATTGAAGGATTTTAAGC

>539

GTCTGTTGAGGTGAGGTCCGAGAAGCTGGCCATGGTGAAGATTGTGCATGAGCCTTTA  
AACCTGGTAAGGAGTTTGAATTATATTCCAAAGATGATGGGAAACCATTGAAGGATTT  
TAAGCAGGAAAGTGACATGATCC

>540

AAGCTGGCCATGGTGAAGATTGTGCATGAGCCTTTAAACCCTGGTAAGGAGTTTGAATT  
ATATTCCAAAGATGATGGGAAACCATTGAAGGATTTTAAGCAGGAAAGTGACATGATC  
CAATTTGTGTTTGAAAGTGACAA

>541

TGTGCATGAGCCTTTAAACCCTGGTAAGGAGTTTGAATTATATTCCAAAGATGATGGGA  
AACCATTGAAGGATTTTAAGCAGGAAAGTGACATGATCCAATTTGTGTTTGAAAGTGA  
CAATTCTGACTGCTGAATAGAGA

>542

GCCTTTAAACCCTGGTAAGGAGTTTGAATTATATTCCAAAGATGATGGGAAACCATTGA  
AGGATTTTAAGCAGGAAAGTGACATGATCCAATTTGTGTTTGAAAGTGACAATTCTGA  
CTGCTGAATAGAGAAAGGTTTGG

>543

CCAAAGATGATGGGAAACCATTGAAGGATTTTAAGCAGGAAAGTGACATGATCCAATT  
TGTGTTTGAAAGTGACAATTCTGACTGCTGAATAGAGAAAGGTTTGGGTAGGGGGGAT  
GGAGATGGAAGTAGAAGAGACCTA

>544

AAGGATTTTAAGCAGGAAAGTGACATGATCCAATTTGTGTTTGAAAGTGACAATTCTG  
ACTGCTGAATAGAGAAAGGTTTGGGTAGGGGGGATGGAGATGGAAGTAGAAGAGACC  
TAGTTAGGAAGCCATGGTGTGGTT

>545

AAAGTGACATGATCCAATTTGTGTTTGAAAGTGACAATTCTGACTGCTGAATAGAGAA  
AGGTTTGGGTAGGGGGGATGGAGATGGAAGTAGAAGAGACCTAGTTAGGAAGCCATG  
GTGTTGGTTAGGTGCCCAGACTAAG

>546

TTGTGTTTGAAAGTGACAATTCTGACTGCTGAATAGAGAAAGGTTTGGGTAGGGGGGA  
TGGAGATGGAAGTAGAAGAGACCTAGTTAGGAAGCCATGGTGTGGTTAGGTGCCCAG  
ACTAAGGTGGAGGGGGTGGCAATG

>547

TGTTTGAAAGTGACAATTCTGACTGCTGAATAGAGAAAGGTTTGGGTAGGGGGGATGG  
AGATGGAAGTAGAAGAGACCTAGTTAGGAAGCCATGGTGTGGTTAGGTGCCCAGACT  
AAGGTGGAGGGGGTGGCAATGGAG

>548

GAAAGTGACAATTCTGACTGCTGAATAGAGAAAGGTTTGGGTAGGGGGGATGGAGAT  
GGAAGTAGAAGAGACCTAGTTAGGAAGCCATGGTGTGGTTAGGTGCCCAGACTAAG  
GTGGAGGGGGTGGCAATGGAGAGAAG

>549

ATTCTGACTGCTGAATAGAGAAAGGTTTGGGTAGGGGGGATGGAGATGGAAGTAGAA  
GAGACCTAGTTAGGAAGCCATGGTGTGGTTAGGTGCCCAGACTAAGGTGGAGGGGG  
TGGCAATGGAGAGAAGTAGATGATCT

>550

GGGTAGGGGGGATGGAGATGGAAGTAGAAGAGACCTAGTTAGGAAGCCATGGTGTGG  
GTTAGGTGCCCAGACTAAGGTGGAGGGGGTGGCAATGGAGAGAAGTAGATGATCTGA  
GAGGTGTGTGTGTGTGTGTGTATA



>551

TGGAGATGGAAGTAGAAGAGACCTAGTTAGGAAGCCATGGTGTGTTGGTTAGGTGCCCAG  
ACTAAGGTGGAGGGGGTGGCAATGGAGAGAAGTAGATGATCTGAGAGGTGTGTGTGT  
GTGTGTGTGTATATATATATATATA

>552

AAGAGACCTAGTTAGGAAGCCATGGTGTGTTGGTTAGGTGCCCAGACTAAGGTGGAGGG  
GGTGGCAATGGAGAGAAGTAGATGATCTGAGAGGTGTGTGTGTGTGTGTGTGTATATAT  
ATATATATACACACACACACACAC

>553

GAGACCTAGTTAGGAAGCCATGGTGTGTTGGTTAGGTGCCCAGACTAAGGTGGAGGGGG  
TGGCAATGGAGAGAAGTAGATGATCTGAGAGGTGTGTGTGTGTGTGTGTGTATATATAT  
ATATATACACACACACACACACAT

>554

CATGGTGTGTTGGTTAGGTGCCCAGACTAAGGTGGAGGGGGTGGCAATGGAGAGAAGTA  
GATGATCTGAGAGGTGTGTGTGTGTGTGTGTGTATATATATATATATACACACACACACA  
CACATATATATGTTTTTTTTTTT

>555

GTGTGTGTGTATATATATATATATACACACACACACACATATATATGTTTTTTTTTTTCT  
TTTTTGAGATGGAGTCTTGCTCTGTCACCCAGGCTGGAGTGCAGTGGCACGATCTTGG  
CTCAGTGCAAGCTCTGCCTC

>556

GTGTATATATATATATATACACACACACACACATATATATGTTTTTTTTTTTCTTTTTTG  
AGATGGAGTCTTGCTCTGTCACCCAGGCTGGAGTGCAGTGGCACGATCTTGGCTCAGT  
GCAAGCTCTGCCTCCTGGGT

>557

ACACACACACACACATATATATGTTTTTTTTTTTCTTTTTTGAGATGGAGTCTTGCTC  
TGTCACCCAGGCTGGAGTGCAGTGGCACGATCTTGGCTCAGTGCAAGCTCTGCCTCCT  
GGGTTCAAGCATTTCTCCTGCC

>558

CACACACACATATATATGTTTTTTTTTTTCTTTTTTGAGATGGAGTCTTGCTCTGTCACCC  
AGGCTGGAGTGCAGTGGCACGATCTTGGCTCAGTGCAAGCTCTGCCTCCTGGGTTCAA  
GCATTTCTCCTGCCTCAGCCT

>559

TTTTTCTTTTTTGAGATGGAGTCTTGCTCTGTCACCCAGGCTGGAGTGCAGTGGCACGA  
TCTTGGCTCAGTGCAAGCTCTGCCTCCTGGGTTCAAGCATTTCTCCTGCCTCAGCCTCC  
TGAGTAGCTGGGACTACTACAA

>560

CTCTGTACCCAGGCTGGAGTGCAGTGGCACGATCTTGGCTCAGTGCAAGCTCTGCCT  
CCTGGGTTCAAGCATTTCTCCTGCCTCAGCCTCCTGAGTAGCTGGGACTACTACAAAG  
GCGTGAGCACCGCGCCGGGCGTGA

>561

GAGTGCAGTGGCACGATCTTGGCTCAGTGCAAGCTCTGCCTCCTGGGTTCAAGCATTT  
CTCCTGCCTCAGCCTCCTGAGTAGCTGGGACTACTACAAAGGCGTGAGCACCGCGCCG  
GCGTGAGTTATATTTTCAAGGCT

>562

CAAGCTCTGCCTCCTGGGTTCAAGCATTTCTCCTGCCTCAGCCTCCTGAGTAGCTGGGA  
CTACTACAAAGGCGTGAGCACCGCGCCGGGCGTGAGTTATATTTTCAAGGCTAGAATT  
GACAGAACTTGGGTTGATGAGAA

>563

TGCCTCCTGGGTTCAAGCATTTCTCCTGCCTCAGCCTCCTGAGTAGCTGGGACTACTAC  
AAAGGCGTGAGCACCGCGCCGGGCGTGAGTTATATTTTCAAGGCTAGAATTGACAGAA  
CTTGGGTTGATGAGAATAGTTGA

>564

ATTTCTCCTGCCTCAGCCTCCTGAGTAGCTGGGACTACTACAAAGGCGTGAGCACCGC  
GCCGGGCGTGAGTTATATTTTCAAGGCTAGAATTGACAGAACTTGGGTTGATGAGAATA  
GTTGATTAGCAGGCAGGGTGCCA

>565

TCCTGAGTAGCTGGGACTACTACAAAGGCGTGAGCACCGCGCCGGGCGTGAGTTATAT  
TTTCAAGGCTAGAATTGACAGAACTTGGGTTGATGAGAATAGTTGATTAGCAGGCAGG  
GTGCCAGGGAGGGTGTTGAGCAGA

>566

AGGCGTGAGCACCGCGCCGGGCGTGAGTTATATTTTCAAGGCTAGAATTGACAGAACT  
TGGGTTGATGAGAATAGTTGATTAGCAGGCAGGGTGCCAGGGAGGGTGTTGAGCAGA  
ACAGAGGGGGGACTGTGCTTTATTT

>567

TGAGCACCGCGCCGGGCGTGAGTTATATTTTCAAGGCTAGAATTGACAGAACTTGGGT  
TGATGAGAATAGTTGATTAGCAGGCAGGGTGCCAGGGAGGGTGTTGAGCAGAACAGA  
GGGGGGACTGTGCTTTATTTTAAAA

>568

GCGTGAGTTATATTTTCAAGGCTAGAATTGACAGAACTTGGGTTGATGAGAATAGTTGA  
TTAGCAGGCAGGGTGCCAGGGAGGGTGTTGAGCAGAACAGAGGGGGGACTGTGCTTT  
ATTTTAAAATTTTATTGAGACAC

>569

CAGAACTTGGGTTGATGAGAATAGTTGATTAGCAGGCAGGGTGCCAGGGAGGGTGTTG  
AGCAGAACAGAGGGGGGACTGTGCTTTATTTTAAAATTTTATTGAGACACAGCATATA  
AAGTATACCCAAATCTTAAGGGT

>570

GCAGGGTGCCAGGGAGGGTGTTGAGCAGAACAGAGGGGGGACTGTGCTTTATTTTAA  
AATTTTATTGAGACACAGCATATAAAGTATACCCAAATCTTAAGGGTATAACATAATGA  
ATTTCACTATCAAGATAAAGATT

>571

TGCCAGGGAGGGTGTTGAGCAGAACAGAGGGGGGACTGTGCTTTATTTTAAAATTTT  
ATTGAGACACAGCATATAAAGTATACCCAAATCTTAAGGGTATAACATAATGAATTTAC  
TATCAAGATAAAGATTTAGAAC

>572

GAGGGGGGACTGTGCTTTATTTTAAAATTTTATTGAGACACAGCATATAAAGTATACCC  
AAATCTTAAGGGTATAACATAATGAATTTCACTATCAAGATAAAGATTTAGAACATTTAT  
AGTTTTCTTGCTCCTTTC

>573

TTTATTGAGACACAGCATATAAAGTATACCCAAATCTTAAGGGTATAACATAATGAATTT  
CACTATCAAGATAAAGATTTAGAACATTTATAGTTTTCTTGTGCTCCTTTTCAGGCAATAC  
CTAAAGGTATTTACCTTGTC

>574

CAGCATATAAAGTATACCCAAATCTTAAGGGTATAACATAATGAATTTCACTATCAAGAT  
AAAGATTTAGAACATTTATAGTTTTCTTGTGCTCCTTTTCAGGCAATACCTAAAGGTATTT  
ACCTTGCTTTTTGATAACCT

>575

GTATACCCAAATCTTAAGGGTATAACATAATGAATTTCACTATCAAGATAAAGATTTAGA  
ACATTTATAGTTTTCTTGTGCTCCTTTTCAGGCAATACCTAAAGGTATTTACCTTGCTTTTT  
GATAACCTCCTCCACATCT

>576

TATAACATAATGAATTTCACTATCAAGATAAAGATTTAGAACATTTATAGTTTTCTTGTGC  
TCCTTTTCAGGCAATACCTAAAGGTATTTACCTTGCTTTTTGATAACCTCCTCCACATCTT  
CCTCTGGTTCCTTTTAAACA

>577

ATTTCACTATCAAGATAAAGATTTAGAACATTTATAGTTTTCTTGTGCTCCTTTTCAGGCA  
ATACCTAAAGGTATTTACCTTGCTTTTTGATAACCTCCTCCACATCTTCCTCTGGTTCCTT  
TTAACAGGGAATGCGTTGA

>578

TGTCTTTTTGATAACCTCCTCCACATCTTCCTCTGGTTCCTTTTAAACAGGGAATGCGTTGA  
ATATGTCAAGAGCTTCAATATCCCTCTACTCGTGCTGGGTGGTGGTGGTTATACTGTCCG  
AAATGTTGCCCGCTGCTGGT

>579

TTCAATATCCCTCTACTCGTGCTGGGTGGTGGTGGTTATACTGTCCGAAATGTTGCCCGC  
TGCTGGTGAGCACTCTCCTGATTTCCCTCCCCTGTTGTCCAGTGTGAGCTAGGGTGTCCC  
TCAGATATGGCCACATGGGCC

>580

GTGGTTATACTGTCCGAAATGTTGCCCGCTGCTGGTGAGCACTCTCCTGATTTCCCTCCC  
CTGTTGTCCAGTGTGAGCTAGGGTGTCCCTCAGATATGGCCACATGGGCCCTTCAGCCC  
ACTTGGTCAGCCTGCTCCCCTC

>581

TGTCCGAAATGTTGCCCGCTGCTGGTGAGCACTCTCCTGATTTCCCTCCCCTGTTGTCCA  
GTGTGAGCTAGGGTGTCCCTCAGATATGGCCACATGGGCCCTTCAGCCCCTTGGTCA  
GCCTGCTCCCCTCTGCTGGTTGG

>582

CCTGATTTCCCTCCCCTGTTGTCCAGTGTGAGCTAGGGTGTCCCTCAGATATGGCCACAT  
GGGCCCTTCAGCCCCTTGGTCAGCCTGCTCCCCTCTGCTGGTTGGTTTCAGGACATAT  
GAGACATCGCTGCTGGTAGAAG

>583

CCTGTTGTCCAGTGTGAGCTAGGGTGTCCCTCAGATATGGCCACATGGGCCCTTCAGCC  
CACTTGGTCAGCCTGCTCCCCTCTGCTGGTTGGTTTCAGGACATATGAGACATCGCTGC  
TGGTAGAAGAGGCCATTAGTGA

>584

CCTCAGATATGGCCACATGGGCCCTTCAGCCCCTTGGTCAGCCTGCTCCCCCTCTGCTG  
GTTGGTTTCAGGACATATGAGACATCGCTGCTGGTAGAAGAGGCCATTAGTGAGGAGC  
TTCCCTATAGTGGTAAGGACACC

>585

GGCCACATGGGCCCTTCAGCCCCTTGGTCAGCCTGCTCCCCCTCTGCTGGTTGGTTTCA  
GGACATATGAGACATCGCTGCTGGTAGAAGAGGCCATTAGTGAGGAGCTTCCCTATAGT  
GGTAAGGACACCCACAACACCC

>586

CAGCCCCTTGGTCAGCCTGCTCCCCCTCTGCTGGTTGGTTTCAGGACATATGAGACATC  
GCTGCTGGTAGAAGAGGCCATTAGTGAGGAGCTTCCCTATAGTGGTAAGGACACCCAC  
AACACCCCATACAGGAAGGCCA

>587

CTCCCCCTCTGCTGGTTGGTTTCAGGACATATGAGACATCGCTGCTGGTAGAAGAGGCCA  
TTAGTGAGGAGCTTCCCTATAGTGGTAAGGACACCCACAACACCCCATACAGGAAGG  
CCATTCTCACCAGATTCCAGAAT

>588

TGGTTGGTTTCAGGACATATGAGACATCGCTGCTGGTAGAAGAGGCCATTAGTGAGGA  
GCTTCCCTATAGTGGTAAGGACACCCACAACACCCCATACAGGAAGGCCATTCTCAC  
CAGATTCCAGAATGACCTGGTTTG

>589

TTTCAGGACATATGAGACATCGCTGCTGGTAGAAGAGGCCATTAGTGAGGAGCTTCCCT  
ATAGTGGTAAGGACACCCACAACACCCCATACAGGAAGGCCATTCTCACCAGATTCC  
AGAATGACCTGGTTTGAAGGCAC

>590

GCTGGTAGAAGAGGCCATTAGTGAGGAGCTTCCCTATAGTGGTAAGGACACCCACAAC  
ACCCCATACAGGAAGGCCATTCTCACCAGATTCCAGAATGACCTGGTTTGAAGGCAC  
ATGGGAAATTTTACACTCTCAGAG

>591

TAGTGAGGAGCTTCCCTATAGTGGTAAGGACACCCACAACACCCCATACAGGAAGGC  
CATTCTCACCAGATTCCAGAATGACCTGGTTTGAAGGCACATGGGAAATTTTACACTCT  
CAGAGCTCTGCAGACTAAACCCC

>592

TAAGGACACCCACAACACCCCATACAGGAAGGCCATTCTCACCAGATTCCAGAATGA  
CCTGGTTTGAAGGCACATGGGAAATTTTACACTCTCAGAGCTCTGCAGACTAAACCCC  
TGGGCTCAGAGCAGGAAGAGATT

>593

AGGAAGGCCATTCTCACCAGATTCCAGAATGACCTGGTTTGAAGGCACATGGGAAATT  
TTACACTCTCAGAGCTCTGCAGACTAAACCCCTGGGCTCAGAGCAGGAAGAGATTG  
GGCAGCTATTATGTAGGTGCTCTGG

>594

TGACCTGGTTTGAAGGCACATGGGAAATTTTACACTCTCAGAGCTCTGCAGACTAAAC  
CCCTGGGCTCAGAGCAGGAAGAGATTGGGCAGCTATTATGTAGGTGCTCTGGATGGG  
AAGGAAAAAGATTGGGAAGTCTTG

>595

ACCTGGTTTGAAGGCACATGGGAAATTTTACACTCTCAGAGCTCTGCAGACTAAACCC  
CTGGGCTCAGAGCAGGGAAGAGATTGGGCAGCTATTATGTAGGTGCTCTGGATGGGAA  
GGAAAAAGATTGGGAAGTCTTGTT

>596

AAGGCACATGGGAAATTTTACACTCTCAGAGCTCTGCAGACTAAACCCCTGGGCTCAG  
AGCAGGGAAGAGATTGGGCAGCTATTATGTAGGTGCTCTGGATGGGAAGGAAAAAGAT  
TGGGAAGTCTTGTTAGCTGCCTTT

>597

AGACTAAACCCCTGGGCTCAGAGCAGGGAAGAGATTGGGCAGCTATTATGTAGGTGCT  
CTGGATGGGAAGGAAAAAGATTGGGAAGTCTTGTTAGCTGCCTTTCTCAGTCTGAGCC  
ATACTTTCTCCTCTCCTCCCCAAG

>598

ACCCCTGGGCTCAGAGCAGGGAAGAGATTGGGCAGCTATTATGTAGGTGCTCTGGATG  
GGAAGGAAAAAGATTGGGAAGTCTTGTTAGCTGCCTTTCTCAGTCTGAGCCATACTTT  
CTCCTCTCCTCCCCAAGAATACTT

>599

CTCAGAGCAGGGAAGAGATTGGGCAGCTATTATGTAGGTGCTCTGGATGGGAAGGAAA  
AAGATTGGGAAGTCTTGTTAGCTGCCTTTCTCAGTCTGAGCCATACTTTCTCCTCTCCT  
CCCCAAGAATACTTCGAGTACTT

>600

GGGAAGAGATTGGGCAGCTATTATGTAGGTGCTCTGGATGGGAAGGAAAAAGATTGGG  
AAGTCTTGTTAGCTGCCTTTCTCAGTCTGAGCCATACTTTCTCCTCTCCTCCCCAAGAAT  
ACTTCGAGTACTTTGCCCCAGA

>601

GGAAGTCTTGTTAGCTGCCTTTCTCAGTCTGAGCCATACTTTCTCCTCTCCTCCCCAAG  
AATACTTCGAGTACTTTGCCCCAGACTTCACACTTCATCCAGATGTCAGCACCCGCATC  
GAGAATCAGAACTCACGCCAGG

>602

GCTGCCTTTCTCAGTCTGAGCCATACTTTCTCCTCTCCTCCCCAAGAATACTTCGAGTAC  
TTTGCCCCAGACTTCACACTTCATCCAGATGTCAGCACCCGCATCGAGAATCAGAACT  
CACGCCAGGTCAGCAGCTCAGA

>603

TCCCCAAGAATACTTCGAGTACTTTGCCCCAGACTTCACACTTCATCCAGATGTCAGCA  
CCCGCATCGAGAATCAGAACTCACGCCAGGTCAGCAGCTCAGAAAAGCTGAGCACAA  
ACTTCTCCTGAAAGGTGGAGCCCA

>604

AGAATACTTCGAGTACTTTGCCCCAGACTTCACACTTCATCCAGATGTCAGCACCCGCA  
TCGAGAATCAGAACTCACGCCAGGTCAGCAGCTCAGAAAAGCTGAGCACAACTTCT  
CCTGAAAGGTGGAGCCCAGGAGAG

>605

GTACTTTGCCCCAGACTTCACACTTCATCCAGATGTCAGCACCCGCATCGAGAATCAGA  
ACTCACGCCAGGTCAGCAGCTCAGAAAAGCTGAGCACAACTTCTCCTGAAAGGTGG  
AGCCCAGGAGAGGTCAAAGATGTG

>606

CCGCATCGAGAATCAGAACTCACGCCAGGTCAGCAGCTCAGAAAAGCTGAGCACAAA  
CTTCTCCTGAAAGGTGGAGCCCAGGAGAGGTCAAAGATGTGGGAAGTAGGAAAAACC  
AAAGAGAAGGAAGTTCTAAGCCATCA

>607

CGAGAATCAGAACTCACGCCAGGTCAGCAGCTCAGAAAAGCTGAGCACAACTTCTC  
CTGAAAGGTGGAGCCCAGGAGAGGTCAAAGATGTGGGAAGTAGGAAAAACCAAAGA  
GAAGGAAGTTCTAAGCCATCACAGTCA

>608

GCCAGGTCAGCAGCTCAGAAAAGCTGAGCACAACTTCTCCTGAAAGGTGGAGCCCA  
GGAGAGGTCAAAGATGTGGGAAGTAGGAAAAACCAAAGAGAAGGAAGTTCTAAGCC  
ATCACAGTCACTGTTATTGACTAGGAG

>609

CAAACCTTCTCCTGAAAGGTGGAGCCCAGGAGAGGTCAAAGATGTGGGAAGTAGGAAA  
AACCAAAGAGAAGGAAGTTCTAAGCCATCACAGTCACTGTTATTGACTAGGAGGCAGT  
CCAGTTTAAAGTAGAGGCAGTTGGG

>610

CTTCTCCTGAAAGGTGGAGCCCAGGAGAGGTCAAAGATGTGGGAAGTAGGAAAAACC  
AAAGAGAAGGAAGTTCTAAGCCATCACAGTCACTGTTATTGACTAGGAGGCAGTCCAG  
TTTAAAGTAGAGGCAGTTGGGGTTG

>611

TGAAAGGTGGAGCCCAGGAGAGGTCAAAGATGTGGGAAGTAGGAAAAACCAAAGAG  
AAGGAAGTTCTAAGCCATCACAGTCACTGTTATTGACTAGGAGGCAGTCCAGTTTAA  
GTAGAGGCAGTTGGGGTTGGTGGGGA

>612

AAGATGTGGGAAGTAGGAAAAACCAAAGAGAAGGAAGTTCTAAGCCATCACAGTCAC  
TGTTATTGACTAGGAGGCAGTCCAGTTTAAAGTAGAGGCAGTTGGGGTTGGTGGGGAG  
GGAGAGCTATCAGTTGGGGGACCTG

>613

CCAAAGAGAAGGAAGTTCTAAGCCATCACAGTCACTGTTATTGACTAGGAGGCAGTCC  
AGTTTAAAGTAGAGGCAGTTGGGGTTGGTGGGGAGGGAGAGCTATCAGTTGGGGGAC  
CTGAAGTAGAGGTACCACTGAGATG

>614

AAAGAGAAGGAAGTTCTAAGCCATCACAGTCACTGTTATTGACTAGGAGGCAGTCCAG  
TTTAAAGTAGAGGCAGTTGGGGTTGGTGGGGAGGGAGAGCTATCAGTTGGGGGACCT  
GAAGTAGAGGTACCACTGAGATGAA

>615

AGAAGGAAGTTCTAAGCCATCACAGTCACTGTTATTGACTAGGAGGCAGTCCAGTTTA  
AAGTAGAGGCAGTTGGGGTTGGTGGGGAGGGAGAGCTATCAGTTGGGGGACCTGAAC  
TAGAGGTACCACTGAGATGAAAACC

>616

CATCACAGTCACTGTTATTGACTAGGAGGCAGTCCAGTTTAAAGTAGAGGCAGTTGGG  
GTTGGTGGGGAGGGAGAGCTATCAGTTGGGGGACCTGAAGTAGAGGTACCACTGAGA  
TGAAAACCAAGTATGGTAGGGGTAAA

>617

GTCCAGTTTAAAGTAGAGGCAGTTGGGGTTGGTGGGGAGGGAGAGCTATCAGTTGGG  
GGACCTGAACTAGAGGTACCACTGAGATGAAAACCAGTATGGTAGGGGTAAAAGGCA  
GCTAGGAGATTCCATGTCCTGGGAAT

>618

TAGAGGCAGTTGGGGTTGGTGGGGAGGGAGAGCTATCAGTTGGGGGACCTGAACTAG  
AGGTACCACTGAGATGAAAACCAGTATGGTAGGGGTAAAAGGCAGCTAGGAGATTCCA  
TGTCTGGGAATCTCTGGAAACTGC

>619

GGGGTTGGTGGGGAGGGAGAGCTATCAGTTGGGGGACCTGAACTAGAGGTACCACTG  
AGATGAAAACCAGTATGGTAGGGGTAAAAGGCAGCTAGGAGATTCCATGTCCTGGGAA  
TCTCTGGAAACTGCTCACTCTGTAT

>620

AGAGCTATCAGTTGGGGGACCTGAACTAGAGGTACCACTGAGATGAAAACCAGTATGG  
TAGGGGTAAAAGGCAGCTAGGAGATTCCATGTCCTGGGAATCTCTGGAAACTGCTCAC  
TCTGTATTCCTCATTTCCAACCAG

>621

TTCCATGTCCTGGGAATCTCTGGAAACTGCTCACTCTGTATTCCTCATTTCCAACCAGTA  
TCTGGACCAGATCCGCCAGACAATCTTTGAAAACCTGAAGATGCTGAACCATGCACCT  
AGTGTCCAGATTCATGACGTGC

>622

CTGGGAATCTCTGGAAACTGCTCACTCTGTATTCCTCATTTCCAACCAGTATCTGGACC  
AGATCCGCCAGACAATCTTTGAAAACCTGAAGATGCTGAACCATGCACCTAGTGTCCA  
GATTCATGACGTGCCTGCAGACC

>623

TCACTCTGTATTCCTCATTTCCAACCAGTATCTGGACCAGATCCGCCAGACAATCTTTG  
AAAACCTGAAGATGCTGAACCATGCACCTAGTGTCCAGATTCATGACGTGCCTGCAGA  
CCTCCTGACCTATGACAGGACTG

>624

CCAACCAGTATCTGGACCAGATCCGCCAGACAATCTTTGAAAACCTGAAGATGCTGAA  
CCATGCACCTAGTGTCCAGATTCATGACGTGCCTGCAGACCTCCTGACCTATGACAGGA  
CTGATGAGGCTGATGCAGAGGAG

>625

CAGACAATCTTTGAAAACCTGAAGATGCTGAACCATGCACCTAGTGTCCAGATTCATG  
ACGTGCCTGCAGACCTCCTGACCTATGACAGGACTGATGAGGCTGATGCAGAGGAGA  
GGGGTCCTGAGGAGAACTATAGCAG

>626

TGAAGATGCTGAACCATGCACCTAGTGTCCAGATTCATGACGTGCCTGCAGACCTCCT  
GACCTATGACAGGACTGATGAGGCTGATGCAGAGGAGAGGGGTCCTGAGGAGAACTA  
TAGCAGGTCTGGGAGCAGGGACTTC

>627

CCTAGTGTCCAGATTCATGACGTGCCTGCAGACCTCCTGACCTATGACAGGACTGATGA  
GGCTGATGCAGAGGAGAGGGGTCTGAGGAGAACTATAGCAGGTCTGGGAGCAGGGA  
CTTCAGCCTACTTTCAATAGGCTT

>628

TCCAGATTCATGACGTGCCTGCAGACCTCCTGACCTATGACAGGACTGATGAGGCTGAT  
GCAGAGGAGAGGGGTCTGAGGAGAACTATAGCAGGTCTGGGAGCAGGGACTTCAGC  
CTACTTTCAATAGGCTTGCTGGGG

>629

TGACGTGCCTGCAGACCTCCTGACCTATGACAGGACTGATGAGGCTGATGCAGAGGAG  
AGGGGTCTGAGGAGAACTATAGCAGGTCTGGGAGCAGGGACTTCAGCCTACTTTCAA  
TAGGCTTGCTGGGGAGGTTTAAAA

>630

CGTGCCTGCAGACCTCCTGACCTATGACAGGACTGATGAGGCTGATGCAGAGGAGAG  
GGGTCTGAGGAGAACTATAGCAGGTCTGGGAGCAGGGACTTCAGCCTACTTTCAATA  
GGCTTGCTGGGGAGGTTTAAAAGGG

>631

CCTATGACAGGACTGATGAGGCTGATGCAGAGGAGAGGGGTCTGAGGAGAACTATA  
GCAGGTCTGGGAGCAGGGACTTCAGCCTACTTTCAATAGGCTTGCTGGGGAGGTTTAA  
AAGGGAAAAAGTAAATGGGAAGGTA

>632

GTCCTGAGGAGAACTATAGCAGGTCTGGGAGCAGGGACTTCAGCCTACTTTCAATAGG  
CTTGCTGGGGAGGTTTAAAAGGGAAAAAGTAAATGGGAAGGTATTAGTTTAATTGCCT  
CTGGCTTACCTCCTTTAGTCTGCT

>633

AGAACTATAGCAGGTCTGGGAGCAGGGACTTCAGCCTACTTTCAATAGGCTTGCTGGG  
GAGGTTTAAAAGGGAAAAAGTAAATGGGAAGGTATTAGTTTAATTGCCTCTGGCTTAC  
CTCCTTTAGTCTGCTACAATTTCC

>634

GAGCAGGGACTTCAGCCTACTTTCAATAGGCTTGCTGGGGAGGTTTAAAAGGGAAAA  
AGTAAATGGGAAGGTATTAGTTTAATTGCCTCTGGCTTACCTCCTTTAGTCTGCTACAAT  
TTCCTCACTCTTTTCTTTGTTAT

>635

GGGGAGGTTTAAAAGGGAAAAAGTAAATGGGAAGGTATTAGTTTAATTGCCTCTGGCT  
TACCTCCTTTAGTCTGCTACAATTTCTCACTCTTTTCTTTGTTATTTTAAATGACAAAAG  
TAACACGTATTTATTGCAAAA

>636

CCTCTGGCTTACCTCCTTTAGTCTGCTACAATTTCTCACTCTTTTCTTTGTTATTTTTAA  
TGACAAAAGTAACACGTATTTATTGCAAAAATTTAAAACAGCACCAAAATATGGTGTTG  
GCGTTCACACAATCCCAGAC

>637

TTCCTCACTCTTTTCTTTGTTATTTTTTAATGACAAAAGTAACACGTATTTATTGCAAAATT  
TTAAAACAGCACCAAAATATGGTGTTGGCGTTCACACAATCCCAGACCTATTCCACAG  
GAGTAACCACTGTTAATAGTT

>638

AGTAACACGTATTTATTGCAAAAATTTAAAACAGCACCAAAATATGGTGTTGGCGTTCA  
CACAATCCCAGACCTATTCCACAGGAGTAACCACTGTTAATAGTTTTTATTGTTTTGGAT  
AGACCTTTTTCTATAGATTGC



>639

TATTGCAAAATTTTAAAACAGCACCAAAATATGGTGTGGCGTTCACACAATCCCAGAC  
CTATTCCACAGGAGTAACCACTGTTAATAGTTTTTATTGTTTTGGATAGACCTTTTTCTAT  
AGATTGCAAATATACTATTC

>640

AGCACCAAAATATGGTGTGGCGTTCACACAATCCCAGACCTATTCCACAGGAGTAAC  
CACTGTTAATAGTTTTTATTGTTTTGGATAGACCTTTTTCTATAGATTGCAAATATACTATT  
CTGTATGTACATATAAACAA

>641

GGCGTTCACACAATCCCAGACCTATTCCACAGGAGTAACCACTGTTAATAGTTTTTATT  
GTTTTGGATAGACCTTTTTCTATAGATTGCAAATATACTATTCTGTATGTACATATAACA  
AACACATATACTCATTTA

>642

CCCAGACCTATTCCACAGGAGTAACCACTGTTAATAGTTTTTATTGTTTTGGATAGACCT  
TTTTCTATAGATTGCAAATATACTATTCTGTATGTACATATAAACAAACACATATACTC  
ATTTACAGTTTGTGTGGTT

>643

TTTTTCTATAGATTGCAAATATACTATTCTGTATGTACATATAAACAAACACATATACT  
CATTTACAGTTTGTGTGGTTTTTGGTTTTTCCGTAAATACAAATAGGGTCATTCTACGTA  
TGCTGCTTTACATCATATA

>644

CATATAAACAAACACATATACTCATTTACAGTTTGTGTGGTTTTTGGTTTTTCCGTAA  
ATACAAATAGGGTCATTCTACGTATGCTGCTTTACATCATATAGCTGTTTTCAGCTAGCTA  
ATATAGATCTGCTTCAGTA

>645

TTGTGTGGTTTTTGGTTTTTCCGTAAATACAAATAGGGTCATTCTACGTATGCTGCTTTA  
CATCATATAGCTGTTTTCAGCTAGCTAATATAGATCTGCTTCAGTATTTTATCAGCTGTAT  
AATAATTTACTATGTGGAT

>646

TTTGGTTTTTCCGTAAATACAAATAGGGTCATTCTACGTATGCTGCTTTACATCATATAGC  
TGTTTTCAGCTAGCTAATATAGATCTGCTTCAGTATTTTATCAGCTGTATAATAATTTACTA  
TGTGGATAGATTATTTT

>647

AGGGTCATTCTACGTATGCTGCTTTACATCATATAGCTGTTTTCAGCTAGCTAATATAGAT  
CTGCTTCAGTATTTTATCAGCTGTATAATAATTTACTATGTGGATAGATTATTTCCATTTT  
TTTGGTATTACAATAAT

>648

ACGTATGCTGCTTTACATCATATAGCTGTTTTCAGCTAGCTAATATAGATCTGCTTCAGTA  
TTTTATCAGCTGTATAATAATTTACTATGTGGATAGATTATTTTCCATTTTTTGGTATTAC  
AATAATAATGTGGCAAT

>649

GTTTTCAGCTAGCTAATATAGATCTGCTTCAGTATTTTATCAGCTGTATAATAATTTACTAT  
GTGGATAGATTATTTTCCATTTTTTGGTATTACAATAATAATGTGGCAATGAACCCCTT  
ACATTATACATCTTTGC

>650

TTTTTGGTATTACAATAATAATGTGGCAATGAACCCCCTTACATTATACATCTTTGCATTCTTGT  
TTGTTTGAGTGGGTAGATAGTAGAATGGTTGCTGCTAGGTCAAAGGCTGTGTGCATTA  
ATTTTTTTTTTTTTTTTTTTT

>651

ATTACAATAATAATGTGGCAATGAACCCCCTTACATTATACATCTTTGCATTCTTGTGTTGA  
GTGGGTAGATAGTAGAATGGTTGCTGCTAGGTCAAAGGCTGTGTGCATTAATTTTTTTTT  
TTTTTTTTTTTTTTTGAGAT

>652

TAATAATGTGGCAATGAACCCCCTTACATTATACATCTTTGCATTCTTGTGTTGAGTGGGT  
AGATAGTAGAATGGTTGCTGCTAGGTCAAAGGCTGTGTGCATTAATTTTTTTTTTTTTTT  
TTTTTTTGAGATGGAGTCT

>653

CTTACATTATACATCTTTGCATTCTTGTGTTGAGTGGGTAGATAGTAGAATGGTTGCTGCT  
AGGTCAAAGGCTGTGTGCATTAATTTTTTTTTTTTTTTTTTTTTTTTGAGATGGAGTCTCAC  
TCTGTTGCCAGGCTGGAGT

>654

AGATAGTAGAATGGTTGCTGCTAGGTCAAAGGCTGTGTGCATTAATTTTTTTTTTTTTTT  
TTTTTTTGAGATGGAGTCTCACTCTGTTGCCAGGCTGGAGTGCAGTGGCTAATCCCGGC  
TCACTGCAACCTCCGCCTCCC

>655

TAGAATGGTTGCTGCTAGGTCAAAGGCTGTGTGCATTAATTTTTTTTTTTTTTTTTTTTT  
GAGATGGAGTCTCACTCTGTTGCCAGGCTGGAGTGCAGTGGCTAATCCCGGCTCACTG  
CAACCTCCGCCTCCCAGGTTC

>656

GGCTGTGTGCATTAATTTTTTTTTTTTTTTTTTTTTTTTGAGATGGAGTCTCACTCTGTTGCC  
AGGCTGGAGTGCAGTGGCTAATCCCGGCTCACTGCAACCTCCGCCTCCCAGGTTCAAG  
CGATTCTCCTGCCTCAGCCTC

>657

GGAGTCTCACTCTGTTGCCAGGCTGGAGTGCAGTGGCTAATCCCGGCTCACTGCAACC  
TCCGCCTCCCAGGTTCAAGCGATTCTCCTGCCTCAGCCTCCTCAGTAGCTGAGATTACA  
GGCATGTGCCACCACACCCGGCT

>658

CACTCTGTTGCCAGGCTGGAGTGCAGTGGCTAATCCCGGCTCACTGCAACCTCCGCCT  
CCCAGGTTCAAGCGATTCTCCTGCCTCAGCCTCCTCAGTAGCTGAGATTACAGGCATGT  
GCCACCACACCCGGCTAACTTTA

>659

TGGCTAATCCCGGCTCACTGCAACCTCCGCCTCCCAGGTTCAAGCGATTCTCCTGCCTC  
AGCCTCCTCAGTAGCTGAGATTACAGGCATGTGCCACCACACCCGGCTAACTTTAGTAT  
TTTAGTAGAGACGGGGTTTCA

>660

CTAATCCCGGCTCACTGCAACCTCCGCCTCCCAGGTTCAAGCGATTCTCCTGCCTCAGC  
CTCCTCAGTAGCTGAGATTACAGGCATGTGCCACCACACCCGGCTAACTTTAGTATTTT  
TAGTAGAGACGGGGTTTACCA

>661

CACTGCAACCTCCGCCTCCCAGGTTCAAGCGATTCTCCTGCCTCAGCCTCCTCAGTAGC  
TGAGATTACAGGCATGTGCCACCACACCCGGCTAACTTTAGTATTTTTAGTAGAGACGG  
GGTTTCACCATGTTGGCCAGGA

>662

GATTCTCCTGCCTCAGCCTCCTCAGTAGCTGAGATTACAGGCATGTGCCACCACACCCG  
GCTAACTTTAGTATTTTTAGTAGAGACGGGGTTTCACCATGTTGGCCAGGATGGTCTTG  
ATCTCTTGACCTTGTGATCCAC

>663

TCAGCCTCCTCAGTAGCTGAGATTACAGGCATGTGCCACCACACCCGGCTAACTTTAGT  
ATTTTTAGTAGAGACGGGGTTTCACCATGTTGGCCAGGATGGTCTTGATCTCTTGACCT  
TGTGATCCACCTGCCTTGGCCT

>664

AGCCTCCTCAGTAGCTGAGATTACAGGCATGTGCCACCACACCCGGCTAACTTTAGTAT  
TTTTAGTAGAGACGGGGTTTCACCATGTTGGCCAGGATGGTCTTGATCTCTTGACCTTG  
TGATCCACCTGCCTTGGCCTCC

>665

AGGCATGTGCCACCACACCCGGCTAACTTTAGTATTTTTAGTAGAGACGGGGTTTCACC  
ATGTTGGCCAGGATGGTCTTGATCTCTTGACCTTGTGATCCACCTGCCTTGGCCTCCCA  
AAGTGCTGGGATTACAGGTGTG

>666

GTTTCACCATGTTGGCCAGGATGGTCTTGATCTCTTGACCTTGTGATCCACCTGCCTTG  
GCCTCCCAAAGTGCTGGGATTACAGGTGTGAGCTACCACGCCCGGCTTTTGAGAATAC  
TTTTTCAAAAAGAAAGAAACCAA

>667

GCCAGGATGGTCTTGATCTCTTGACCTTGTGATCCACCTGCCTTGGCCTCCCAAAGTGC  
TGGGATTACAGGTGTGAGCTACCACGCCCGGCTTTTGAGAATACTTTTTCAAAAAGAA  
AGAAACCAATATTGAGTACCTGT

>668

GTGATCCACCTGCCTTGGCCTCCCAAAGTGCTGGGATTACAGGTGTGAGCTACCACGC  
CCGGCTTTTGAGAATACTTTTTCAAAAAGAAAGAAACCAATATTGAGTACCTGTTGGG  
CCCTGTTTTGCTTTCACATCCATT

>669

GCCTCCCAAAGTGCTGGGATTACAGGTGTGAGCTACCACGCCCGGCTTTTGAGAATAC  
TTTTTCAAAAAGAAAGAAACCAATATTGAGTACCTGTTGGGCCCTGTTTTGCTTTCACA  
TCCATTCTTTCATATGGGTTTA

>670

CCCAAAGTGCTGGGATTACAGGTGTGAGCTACCACGCCCGGCTTTTGAGAATACTTTTT  
CAAAAAGAAAGAAACCAATATTGAGTACCTGTTGGGCCCTGTTTTGCTTTCACATCCAT  
TCTTTCATATGGGTTTATAAT

>671

CTTTCATATGGGTTTATAATACCACGTCACTCTTCTTAAAATTAAACTCTCCTTTACCT  
TGCACTTAGAAGAAAATCCAAAATTTTGACTGTGGCTTAAAAAGGTCTGCATGCTAG  
CCCTTACCTACATCCAGGATC

>672

TCACTATGGGTTTATAATACCACGTCCTCTTCTTAAAATTAAAACCTCTCCTTTACCTTG  
CACTTAGAAGAAAATCCAAAATTTTGACTGTGGCTTAAAAAGGTCCTGCATGCTAGCC  
CTTACCTACATCCAGGATCTCA

>673

CTTAAAATTAAAACCTCTCCTTTACCTTGCACTTAGAAGAAAATCCAAAATTTTGACTGT  
GGCTTAAAAAGGTCCTGCATGCTAGCCCTTACCTACATCCAGGATCTCATCTCTAACTA  
CTCTCCTCCATGCACAGTGCTC

>674

TCTCCTTTACCTTGCACTTAGAAGAAAATCCAAAATTTTGACTGTGGCTTAAAAAGGTC  
CTGCATGCTAGCCCTTACCTACATCCAGGATCTCATCTCTAACTACTCTCCTCCATGCAC  
AGTGCTCCCGGCTGTCCTGGC

>675

TTAGAAGAAAATCCAAAATTTTGACTGTGGCTTAAAAAGGTCCTGCATGCTAGCCCTTA  
CCTACATCCAGGATCTCATCTCTAACTACTCTCCTCCATGCACAGTGCTCCCGGCTGTCC  
TGGCCTCCTTGTTCTTACTGG

>676

AAAAGGTCCTGCATGCTAGCCCTTACCTACATCCAGGATCTCATCTCTAACTACTCTCCT  
CCATGCACAGTGCTCCCGGCTGTCCTGGCCTCCTTGTTCTTACTGGAATACATCAGTCT  
CTTTCCATTTTCATGACCTCTG

>677

CTAACTACTCTCCTCCATGCACAGTGCTCCCGGCTGTCCTGGCCTCCTTGTTCTTACTG  
GAATACATCAGTCTCTTTCCATTTTCATGACCTCTGTAGTTGGTTTTCTTGCAGCTTGGA  
TGGCCTTCCTGAAGTCTTTGC

>678

TCCCGGCTGTCCTGGCCTCCTTGTTCTTACTGGAATACATCAGTCTCTTTCCATTTTCATG  
ACCTCTGTAGTTGGTTTTCTTGCAGCTTGGAATGGCCTTCCTGAAGTCTTTGCCTGCTT  
AGCTCCTCCTCAGACTTTAGG

>679

CCTCCTTGTTCTTACTGGAATACATCAGTCTCTTTCCATTTTCATGACCTCTGTAGTTGGT  
TTTCTTGCAGCTTGGAATGGCCTTCCTGAAGTCTTTGCCTGCTTAGCTCCTCCTCAGAC  
TTTAGGTCTTATGTCCCAATA

>680

ACATCAGTCTCTTTCCATTTTCATGACCTCTGTAGTTGGTTTTCTTGCAGCTTGGAATGGC  
CTTCCTGAAGTCTTTGCCTGCTTAGCTCCTCCTCAGACTTTAGGTCTTATGTCCCAATAG  
TCCTGTCTGAAATTCACCC

>681

CATTTTCATGACCTCTGTAGTTGGTTTTCTTGCAGCTTGGAATGGCCTTCCTGAAGTCTTT  
GCCTGCTTAGCTCCTCCTCAGACTTTAGGTCTTATGTCCCAATAGTCCTGTCTGAAATTT  
CACCTTTTCCTCTCATCAC

>682

CTCTGTAGTTGGTTTTCTTGCAGCTTGGAATGGCCTTCCTGAAGTCTTTGCCTGCTTAG  
CTCCTCCTCAGACTTTAGGTCTTATGTCCCAATAGTCCTGTCTGAAATTTACCCTTTTT  
CTCTCATCACCTTCAGTCCTA

>683

GTTGGTTTTCTTGCAGCTTGGAATGGCCTTCCTGAAGTCTTTGCCTGCTTAGCTCCTCC  
TCAGACTTTAGGTCTTATGTCCCAATAGTCCTGTCTGAAATTCACCCCTTTTCCTCTCAT  
CACCTTCAGTCCTATCACTTC

>684

CTCAGACTTTAGGTCTTATGTCCCAATAGTCCTGTCTGAAATTCACCCCTTTTCCTCTCA  
TCACCTTCAGTCCTATCACTTCATTTTATTAATTGTACTCTCCATCATCTGAAATTATTATA  
TTTATTTACTTTGTTAGT

>685

GTCCTATCACTTCATTTTATTAATTGTACTCTCCATCATCTGAAATTATTATATTTATTTACT  
TTGTTAGTTACTAGTCTCATTTATTAGGTAAGCTTTTTGAGGATAGACAACCTTGTCCAG  
CTTGTTACTCTACTGTA

>686

CACCTTCATTTTATTAATTGTACTCTCCATCATCTGAAATTATTATATTTATTTACTTTGTTA  
GTTACTAGTCTCATTTATTAGGTAAGCTTTTTGAGGATAGACAACCTTGTCCAGCTTGTT  
ACTCTACTGTATTGCTAA

>687

ATCATCTGAAATTATTATATTTATTTACTTTGTTAGTTACTAGTCTCATTTATTAGGTAAGC  
TTTTTGAGGATAGACAACCTTGTCCAGCTTGTTACTCTACTGTATTGCTAAGGTTTATGA  
CAGTGTCTGTATAGAGTA

>688

CTGAAATTATTATATTTATTTACTTTGTTAGTTACTAGTCTCATTTATTAGGTAAGCTTTTT  
GAGGATAGACAACCTTGTCCAGCTTGTTACTCTACTGTATTGCTAAGGTTTATGACAGT  
GTCTGTATAGAGTAGTTCC

>689

TTTATTTACTTTGTTAGTTACTAGTCTCATTTATTAGGTAAGCTTTTTGAGGATAGACAAC  
CTTGTCAGCTTGTTACTCTACTGTATTGCTAAGGTTTATGACAGTGTCTGTATAGAGTA  
GTTCCCTTAATGTTTATTTG

>690

CTCATTTATTAGGTAAGCTTTTTGAGGATAGACAACCTTGTCCAGCTTGTTACTCTACTG  
TATTGCTAAGGTTTATGACAGTGTCTGTATAGAGTAGTTCCTTAATGTTTATTTGATACGT  
GAATGGGTGAATGAATAGC

>691

TGAGGATAGACAACCTTGTCCAGCTTGTTACTCTACTGTATTGCTAAGGTTTATGACAG  
TGTCTGTATAGAGTAGTTCCTTAATGTTTATTTGATACGTGAATGGGTGAATGAATAGCA  
GTCTCTACCAACAAGAGGAGG

>692

AGGATAGACAACCTTGTCCAGCTTGTTACTCTACTGTATTGCTAAGGTTTATGACAGTG  
TCTGTATAGAGTAGTTCCTTAATGTTTATTTGATACGTGAATGGGTGAATGAATAGCAGT  
CTCTACCAACAAGAGGAGGAG

>693

GGTTTATGACAGTGTCTGTATAGAGTAGTTCCTTAATGTTTATTTGATACGTGAATGGGT  
GAATGAATAGCAGTCTCTACCAACAAGAGGAGGAGTGGTTCTCAACGGGGCCTGAGA  
AATGGCTTTGGAAAAGGGTGCTG

>694

GTATAGAGTAGTTCCTTAATGTTTATTTGATACGTGAATGGGTGAATGAATAGCAGTCTC  
TACCAACAAGAGGAGGAGTGGTTCTCAACGGGGCCTGAGAAATGGCTTTGGAAAAGG  
GTGCTGGGAGAAGATTAGAACTT

>695

ATAGAGTAGTTCCTTAATGTTTATTTGATACGTGAATGGGTGAATGAATAGCAGTCTCTA  
CCAACAAGAGGAGGAGTGGTTCTCAACGGGGCCTGAGAAATGGCTTTGGAAAAGGGT  
GCTGGGAGAAGATTAGAACTTAG

>696

ATACGTGAATGGGTGAATGAATAGCAGTCTCTACCAACAAGAGGAGGAGTGGTTCTCA  
ACGGGGCCTGAGAAATGGCTTTGGAAAAGGGTGCTGGGAGAAGATTAGAACTTAGAG  
TGAGATCCTGACCTCTCTCCCCTTG

>697

CTCTACCAACAAGAGGAGGAGTGGTTCTCAACGGGGCCTGAGAAATGGCTTTGGAAA  
AGGGTGCTGGGAGAAGATTAGAACTTAGAGTGAGATCCTGACCTCTCTCCCCTTGCTT  
TGCAGGCCAGAGGCACCCAATGAGT

>698

TACCAACAAGAGGAGGAGTGGTTCTCAACGGGGCCTGAGAAATGGCTTTGGAAAAGG  
GTGCTGGGAGAAGATTAGAACTTAGAGTGAGATCCTGACCTCTCTCCCCTTGCTTTGC  
AGGCCAGAGGCACCCAATGAGTTCT

>699

GAGGAGTGGTTCTCAACGGGGCCTGAGAAATGGCTTTGGAAAAGGGTGCTGGGAGAA  
GATTAGAACTTAGAGTGAGATCCTGACCTCTCTCCCCTTGCTTTGCAGGCCAGAGGCA  
CCCAATGAGTTCTATGATGGAGACC

>700

AAAGGGTGCTGGGAGAAGATTAGAACTTAGAGTGAGATCCTGACCTCTCTCCCCTTGC  
TTTGCAGGCCAGAGGCACCCAATGAGTTCTATGATGGAGACCATGACAATGACAAGGA  
AAGCGATGTGGAGATTTAAGAGTG

>701

AGGGTGCTGGGAGAAGATTAGAACTTAGAGTGAGATCCTGACCTCTCTCCCCTTGCTT  
TGCAGGCCAGAGGCACCCAATGAGTTCTATGATGGAGACCATGACAATGACAAGGAA  
AGCGATGTGGAGATTTAAGAGTGGC

>702

GAAGATTAGAACTTAGAGTGAGATCCTGACCTCTCTCCCCTTGCTTTGCAGGCCAGAG  
GCACCCAATGAGTTCTATGATGGAGACCATGACAATGACAAGGAAAGCGATGTGGAGA  
TTTAAGAGTGGCTTGGGATGCTGT

>703

CTCTCTCCCCTTGCTTTGCAGGCCAGAGGCACCCAATGAGTTCTATGATGGAGACCATG  
ACAATGACAAGGAAAGCGATGTGGAGATTTAAGAGTGGCTTGGGATGCTGTGTCCCAA  
GGAATTTCTTTTCACCTCTTGGT

>704

TTGCAGGCCAGAGGCACCCAATGAGTTCTATGATGGAGACCATGACAATGACAAGGAA  
AGCGATGTGGAGATTTAAGAGTGGCTTGGGATGCTGTGTCCCAAGGAATTTCTTTTAC  
CTCTTGGTTGGGCTGGAGGGAAA

>705

CCAGAGGCACCCAATGAGTTCTATGATGGAGACCATGACAATGACAAGGAAAGCGATG  
TGGAGATTTAAGAGTGGCTTGGGATGCTGTGTCCCAAGGAATTTCTTTTCACCTCTTGG  
TTGGGCTGGAGGGAAAAGGAGTG

>706

TGGAGACCATGACAATGACAAGGAAAGCGATGTGGAGATTTAAGAGTGGCTTGGGAT  
GCTGTGTCCCAAGGAATTTCTTTTCACCTCTTGGTTGGGCTGGAGGGAAAAGGAGTGG  
CTCCTAGAGTCCTGGGGGTCACCCC

>707

TGGAGATTTAAGAGTGGCTTGGGATGCTGTGTCCCAAGGAATTTCTTTTCACCTCTTGG  
TTGGGCTGGAGGGAAAAGGAGTGGCTCCTAGAGTCCTGGGGGTCACCCCAGGGCTTT  
TGCTGACTCTGGGAAAGAGTCTGG

>708

TTAAGAGTGGCTTGGGATGCTGTGTCCCAAGGAATTTCTTTTCACCTCTTGGTTGGGCT  
GGAGGGAAAAGGAGTGGCTCCTAGAGTCCTGGGGGTCACCCCAGGGCTTTTGCTGAC  
TCTGGGAAAGAGTCTGGAGACCAC

>709

GGGATGCTGTGTCCCAAGGAATTTCTTTTCACCTCTTGGTTGGGCTGGAGGGAAAAGG  
AGTGGCTCCTAGAGTCCTGGGGGTCACCCCAGGGCTTTTGCTGACTCTGGGAAAGAGT  
CTGGAGACCACATTTGGTTCTCGA

>710

GCTGGAGGGAAAAGGAGTGGCTCCTAGAGTCCTGGGGGTCACCCCAGGGCTTTTGCT  
GACTCTGGGAAAGAGTCTGGAGACCACATTTGGTTCTCGAACCATCTACCTGCTTTTCC  
TCTCTCTCCCAAGGCCTGACAATG

>711

TGGAGGGAAAAGGAGTGGCTCCTAGAGTCCTGGGGGTCACCCCAGGGCTTTTGCTGA  
CTCTGGGAAAGAGTCTGGAGACCACATTTGGTTCTCGAACCATCTACCTGCTTTTCTC  
TCTCTCCCAAGGCCTGACAATGGT

>712

CTCTGGGAAAGAGTCTGGAGACCACATTTGGTTCTCGAACCATCTACCTGCTTTTCTC  
TCTCTCCCAAGGCCTGACAATGGTACCTATTAGGGATGAGATACAGACAAGGATAGCTA  
TCTGGGACATTATTGGCAGTGG

>713

CACATTTGGTTCTCGAACCATCTACCTGCTTTTCTCTCTCTCCCAAGGCCTGACAATG  
GTACCTATTAGGGATGAGATACAGACAAGGATAGCTATCTGGGACATTATTGGCAGTGG  
GCCCTGGAGGCCAGTCCCTAGC

>714

CGAACCATCTACCTGCTTTTCTCTCTCTCTCCCAAGGCCTGACAATGGTACCTATTAGGG  
ATGAGATACAGACAAGGATAGCTATCTGGGACATTATTGGCAGTGGGCCCTGGAGGCC  
AGTCCCTAGCCCCCTTGCCCCCT

>715

AAGGCCTGACAATGGTACCTATTAGGGATGAGATACAGACAAGGATAGCTATCTGGGA  
CATTATTGGCAGTGGGCCCTGGAGGCCAGTCCCTAGCCCCCTTGCCCCCTTATTTCTTC  
CCTGCTTCCCTCGAACCCAGAGA

>716

TGGTACCTATTAGGGATGAGATACAGACAAGGATAGCTATCTGGGACATTATTGGCAGT  
GGGCCCTGGAGGCCAGTCCCTAGCCCCCCTTGCCCCTTATTTCTTCCCTGCTTCCCTCG  
AACCCAGAGATTTTTGAGGGAT

>717

CAGTGGGCCCTGGAGGCCAGTCCCTAGCCCCCCTTGCCCCTTATTTCTTCCCTGCTTCC  
CTCGAACCCAGAGATTTTTGAGGGATGAACGGGTAGACAAGGACTGAGATTGCCTCTG  
ACTTCTCCTCCCCTGGGTTCTG

>718

GTGGGCCCTGGAGGCCAGTCCCTAGCCCCCCTTGCCCCTTATTTCTTCCCTGCTTCCCT  
CGAACCCAGAGATTTTTGAGGGATGAACGGGTAGACAAGGACTGAGATTGCCTCTGAC  
TTCCTCCTCCCCTGGGTTCTGAC

>719

CCCTTGCCCCTTATTTCTTCCCTGCTTCCCTCGAACCCAGAGATTTTTGAGGGATGAAC  
GGGTAGACAAGGACTGAGATTGCCTCTGACTTCCTCCTCCCCTGGGTTCTGACTTCTTC  
CTCCCCTTGCTTCCAGGGAAGA

>720

CCCTTATTTCTTCCCTGCTTCCCTCGAACCCAGAGATTTTTGAGGGATGAACGGGTAGA  
CAAGGACTGAGATTGCCTCTGACTTCCTCCTCCCCTGGGTTCTGACTTCTTCTCCCCT  
TGCTTCCAGGGAAGATGAAGAG

>721

GGACTGAGATTGCCTCTGACTTCCTCCTCCCCTGGGTTCTGACTTCTTCTCCCCTTGC  
TTCCAGGGAAGATGAAGAGAGAGAGATTTGGAAGGGGCTCTGGCTCCCTAACACCTG  
AATCCCAGATGATGGGAAGTATGT

>722

AGATTGCCTCTGACTTCCTCCTCCCCTGGGTTCTGACTTCTTCTCCCCTTGCTTCCAG  
GGAAGATGAAGAGAGAGAGATTTGGAAGGGGCTCTGGCTCCCTAACACCTGAATCCC  
AGATGATGGGAAGTATGTTTTCAA

>723

CCTCTGACTTCCTCCTCCCCTGGGTTCTGACTTCTTCTCCCCTTGCTTCCAGGGAAGA  
TGAAGAGAGAGAGATTTGGAAGGGGCTCTGGCTCCCTAACACCTGAATCCCAGATGAT  
GGGAAGTATGTTTTCAAGTGTGG

>724

CTTGCTTCCAGGGAAGATGAAGAGAGAGAGATTTGGAAGGGGCTCTGGCTCCCTAAC  
ACCTGAATCCCAGATGATGGGAAGTATGTTTTCAAGTGTGGGGAGGATATGAAAATGTT  
CTGTTCTCACTTTTGGCTTTATGT

>725

GGAAGATGAAGAGAGAGAGATTTGGAAGGGGCTCTGGCTCCCTAACACCTGAATCCC  
AGATGATGGGAAGTATGTTTTCAAGTGTGGGGAGGATATGAAAATGTTCTGTTCTCACT  
TTTGGCTTTATGTCCATTTTACCA

>726

GAGAGAGATTTGGAAGGGGCTCTGGCTCCCTAACACCTGAATCCCAGATGATGGGAAG  
TATGTTTTCAAGTGTGGGGAGGATATGAAAATGTTCTGTTCTCACTTTTGGCTTTATGTC  
CATTTTACCACTGTTTTTATCC



>727

GGTGAAATCCCAGCTCAGGTGTTATATCCTTGCTGCTTCTGACAAATGAAACCAAGGTG  
TATTAATTAAGGTAATGCTAGCTACTACAATAAGCTGAAAAATATATAATAGCTAAAAGC  
TAGGGTGCCAGATTTAGGAAA

>728

CAGCTCAGGTGTTATATCCTTGCTGCTTCTGACAAATGAAACCAAGGTGTATTAATTAA  
GGTAATGCTAGCTACTACAATAAGCTGAAAAATATATAATAGCTAAAAGCTAGGGTGCC  
AGATTTAGGAAAATAAAAAACAA

>729

ACAAATGAAACCAAGGTGTATTAATTAAGGTAATGCTAGCTACTACAATAAGCTGAAAA  
ATATATAATAGCTAAAAGCTAGGGTGCCAGATTTAGGAAAATAAAAAACAAACAAAAAA  
CAATTGAAATTTGAATTTTCAGAT

>730

AAACCAAGGTGTATTAATTAAGGTAATGCTAGCTACTACAATAAGCTGAAAAATATATAA  
TAGCTAAAAGCTAGGGTGCCAGATTTAGGAAAATAAAAAACAAACAAAAAACAATTGA  
AATTTGAATTTTCAGATAAACAAT

>731

CAAGGTGTATTAATTAAGGTAATGCTAGCTACTACAATAAGCTGAAAAATATATAATAGC  
TAAAAGCTAGGGTGCCAGATTTAGGAAAATAAAAAACAAACAAAAAACAATTGAAATTT  
GAATTTTCAGATAAACAATTTTT

>732

TAAGGTAATGCTAGCTACTACAATAAGCTGAAAAATATATAATAGCTAAAAGCTAGGGT  
GCCAGATTTAGGAAAATAAAAAACAAACAAAAAACAATTGAAATTTGAATTTTCAGATAA  
ACAATTTTTTTTAGTATAATTATG

>733

AGCTAAAAGCTAGGGTGCCAGATTTAGGAAAATAAAAAACAAACAAAAAACAATTGAA  
ATTTGAATTTTCAGATAAACAATTTTTTTTAGTATAATTATGTCCCATGCAATATTTGAGACA  
TACTAAAAGGTTATTCATTGTT

>734

CCAGATTTAGGAAAATAAAAAACAAACAAAAAACAATTGAAATTTGAATTTTCAGATAAA  
CAATTTTTTTTAGTATAATTATGTCCCATGCAATATTTGAGACATACTAAAAGGTTATTCAT  
TGTTTATCTGATATTCAAATT

>735

AAAACAATTGAAATTTGAATTTTCAGATAAACAATTTTTTTTAGTATAATTATGTCCCATGC  
AATATTTGAGACATACTAAAAGGTTATTCATTGTTTATCTGATATTCAAATTTAACATTTT  
CATTAATTTATTTTATTTG

>736

ATTTGAATTTTCAGATAAACAATTTTTTTTAGTATAATTATGTCCCATGCAATATTTGAGACA  
TACTAAAAGGTTATTCATTGTTTATCTGATATTCAAATTTAACATTTTCATTAATTTATTTT  
ATTTGGCAGCCCTATGG

>737

ACTAAAAGGTTATTCATTGTTTATCTGATATTCAAATTTAACATTTTCATTAATTTATTTTA  
TTTGGCAGCCCTATGGAAGACATCAAAGTTTATTTCTTATTTATATAAAGTCCAAAATA  
GATGTTTTTTTAGTAGGCA

>738

ATTCATTGTTTATCTGATATTCAAATTTAACATTTTCATTAATTTATTTTATTTGGCAGCCC  
TATGGAAGACATCAAAAGTTTATTTCTTATTTATATAAAAGTCCAAAATAGATGTTTTTTAG  
TAGGCAGGCAGCTCTTC

>739

TATCTGATATTCAAATTTAACATTTTCATTAATTTATTTTATTTGGCAGCCCTATGGAAGA  
CATCAAAAGTTTATTTCTTATTTATATAAAAGTCCAAAATAGATGTTTTTTAGTAGGCAGG  
CAGCTCTTCTCTAAGCGTA

>740

TTTATTTTATTTGGCAGCCCTATGGAAGACATCAAAAGTTTATTTCTTATTTATATAAAAGT  
CCAAAATAGATGTTTTTTAGTAGGCAGGCAGCTCTTCTCTAAGCGTAATTCAGGGCTCT  
GGGTTCTGTCCATCCTGGCC

>741

TGGCAGCCCTATGGAAGACATCAAAAGTTTATTTCTTATTTATATAAAAGTCCAAAATAGA  
TGTTTTTTAGTAGGCAGGCAGCTCTTCTCTAAGCGTAATTCAGGGCTCTGGGTTCTGTC  
CATCCTGGCCCTGACGTCTTT

>742

CAGCCCTATGGAAGACATCAAAAGTTTATTTCTTATTTATATAAAAGTCCAAAATAGATGT  
TTTTTAGTAGGCAGGCAGCTCTTCTCTAAGCGTAATTCAGGGCTCTGGGTTCTGTCCAT  
CCTGGCCCTGACGTCTTTTCAT

>743

AAAGTTTATTTCTTATTTATATAAAAGTCCAAAATAGATGTTTTTTAGTAGGCAGGCAGCT  
CTTCTCTAAGCGTAATTCAGGGCTCTGGGTTCTGTCCATCCTGGCCCTGACGTCTTTTCAT  
TGCTCAGCTTCTAAGATAGC

>744

GCTCTTCTCTAAGCGTAATTCAGGGCTCTGGGTTCTGTCCATCCTGGCCCTGACGTCTT  
TCATTGCTCAGCTTCTAAGATAGCTCTATGCTCATGGGGTCAAGTCACAGGAAAGAAA  
AGGGAATGTGGAGTTCCACTTGG

>745

CTAAGCGTAATTCAGGGCTCTGGGTTCTGTCCATCCTGGCCCTGACGTCTTTCATTGCT  
CAGCTTCTAAGATAGCTCTATGCTCATGGGGTCAAGTCACAGGAAAGAAAAGGGAATG  
TGGAGTTCCACTTGGGAGTTTTT

>746

TCTGTCCATCCTGGCCCTGACGTCTTTCATTGCTCAGCTTCTAAGATAGCTCTATGCTCA  
TGGGGTCAAGTCACAGGAAAGAAAAGGGAATGTGGAGTTCCACTTGGGAGTTTTTAT  
GGGCCAGTCCTGGAAGCGGCACA

>747

CATCCTGGCCCTGACGTCTTTCATTGCTCAGCTTCTAAGATAGCTCTATGCTCATGGGGT  
CAAGTCACAGGAAAGAAAAGGGAATGTGGAGTTCCACTTGGGAGTTTTTATGGGCCA  
GTCCTGGAAGCGGCACAGAGGAT

>748

CTGACGTCTTTCATTGCTCAGCTTCTAAGATAGCTCTATGCTCATGGGGTCAAGTCACA  
GGAAAGAAAAGGGAATGTGGAGTTCCACTTGGGAGTTTTTATGGGCCAGTCCTGGAA  
GCGGCACAGAGGATTTCTGCTCAC

>749

CTAAGATAGCTCTATGCTCATGGGGTCAAGTCACAGGAAAGAAAAGGGAATGTGGAGT  
TCCACTTGGGAGTTTTTATGGGCCAGTCCTGGAAGCGGCACAGAGGATTTCTGCTCAC  
AATCTATTGGCCAGAACTCAATCA

>750

GGTCAAGTCACAGGAAAGAAAAGGGAATGTGGAGTTCCACTTGGGAGTTTTTATGGG  
CCAGTCCTGGAAGCGGCACAGAGGATTTCTGCTCACAATCTATTGGCCAGAACTCAAT  
CACATGGCCTGCACCTAACTGCAAG

>751

CACAGGAAAGAAAAGGGAATGTGGAGTTCCACTTGGGAGTTTTTATGGGCCAGTCCTG  
GAAGCGGCACAGAGGATTTCTGCTCACAATCTATTGGCCAGAACTCAATCACATGGCC  
TGCACCTAACTGCAAGTTAAGCCA

>752

CACTTGGGAGTTTTTATGGGCCAGTCCTGGAAGCGGCACAGAGGATTTCTGCTCACAA  
TCTATTGGCCAGAACTCAATCACATGGCCTGCACCTAACTGCAAGTTAAGCCAGAAAA  
ATGTAGGTGTGCCCAGGAAGAAGT

>753

CGGCACAGAGGATTTCTGCTCACAATCTATTGGCCAGAACTCAATCACATGGCCTGCAC  
CTAACTGCAAGTTAAGCCAGAAAAATGTAGGTGTGCCCAGGAAGAAGTTTGGGGAAC  
AGCTAGCCAGTCTCTGCCACACCT

>754

CAGAGGATTTCTGCTCACAATCTATTGGCCAGAACTCAATCACATGGCCTGCACCTAAC  
TGCAAGTTAAGCCAGAAAAATGTAGGTGTGCCCAGGAAGAAGTTTGGGGAACAGCTA  
GCCAGTCTCTGCCACACCTGGTAA

>755

TTGGCCAGAACTCAATCACATGGCCTGCACCTAACTGCAAGTTAAGCCAGAAAAATGT  
AGGTGTGCCCAGGAAGAAGTTTGGGGAACAGCTAGCCAGTCTCTGCCACACCTGGTA  
ACAGCAGAGTGAATCTGTCAGTACT

>756

ATGGCCTGCACCTAACTGCAAGTTAAGCCAGAAAAATGTAGGTGTGCCCAGGAAGAA  
GTTTGGGGAACAGCTAGCCAGTCTCTGCCACACCTGGTAACAGCAGAGTGAATCTGTC  
AGTACTCGTGCCTAATGCGTGTCTC

>757

CCTGCACCTAACTGCAAGTTAAGCCAGAAAAATGTAGGTGTGCCCAGGAAGAAGTTTG  
GGGAACAGCTAGCCAGTCTCTGCCACACCTGGTAACAGCAGAGTGAATCTGTCAGTAC  
TCGTGCCTAATGCGTGTCTCATAT

>758

GAAAAATGTAGGTGTGCCCAGGAAGAAGTTTGGGGAACAGCTAGCCAGTCTCTGCCA  
CACCTGGTAACAGCAGAGTGAATCTGTCAGTACTCGTGCCTAATGCGTGTCTCATATGC  
TAGTGCTGGATTCAAGTCAGCAGTC

>759

CCAGGAAGAAGTTTGGGGAACAGCTAGCCAGTCTCTGCCACACCTGGTAACAGCAGA  
GTGAATCTGTCAGTACTCGTGCCTAATGCGTGTCTCATATGCTAGTGCTGGATTCAAGTCA  
GCAGTCCTACATCCGCTGGGGTC

>760

CTCTGCCACACCTGGTAACAGCAGAGTGAATCTGTCAGTACTCGTGCCTAATGCGTGTC  
TCATATGCTAGTGCTGGATTCAAGTCAGCAGTCCTACATCCGCTGGGGTCCCTAGGAGGG  
GTCAGATGCTCTCCTCTTTGCC

>761

TGGTAACAGCAGAGTGAATCTGTCAGTACTCGTGCCTAATGCGTGCTCATATGCTAGT  
GCTGGATTCAAGTCAGCAGTCCTACATCCGCTGGGGTCCCTAGGAGGGGTCAGATGCTC  
TCTCTTTGCCCTGAACTGGTTA

>762

GTGCCTAATGCGTGCTCATATGCTAGTGCTGGATTCAAGTCAGCAGTCCTACATCCGCT  
GGGGTCCCTAGGAGGGGTCAGATGCTCTCCTCTTTGCCCTGAACTGGTTAGCTACTTCG  
GACTGGGATGACAAGGCCATTG

>763

CCTAATGCGTGCTCATATGCTAGTGCTGGATTCAAGTCAGCAGTCCTACATCCGCTGGG  
GTCCCTAGGAGGGGTCAGATGCTCTCCTCTTTGCCCTGAACTGGTTAGCTACTTCGGAC  
TGGGATGACAAGGCCATTGTGA

>764

CAGCAGTCCTACATCCGCTGGGGTCCCTAGGAGGGGTCAGATGCTCTCCTCTTTGCCCT  
GAACTGGTTAGCTACTTCGGACTGGGATGACAAGGCCATTGTGAGAGTGATAAGCAAT  
GTGATTCAAACAAATTCATTCA

>765

TCCCTAGGAGGGGTCAGATGCTCTCCTCTTTGCCCTGAACTGGTTAGCTACTTCGGACT  
GGGATGACAAGGCCATTGTGAGAGTGATAAGCAATGTGATTCAAACAAATTCATTCA  
CTTCAATTCAATGCAGGTTTTTT

>766

GGTCAGATGCTCTCCTCTTTGCCCTGAACTGGTTAGCTACTTCGGACTGGGATGACAAG  
GCCATTGTGAGAGTGATAAGCAATGTGATTCAAACAAATTCATTCACTTCAATTCAAT  
GCAGGTTTTTTTTTTTTTTTGA

>767

TGACAAGGCCATTGTGAGAGTGATAAGCAATGTGATTCAAACAAATTCATTCACTTCA  
ATTCAATGCAGGTTTTTTTTTTTTTTTGTGAGACGGGCTGTCATGCTGTTGCCAACCCCTG  
AGAGCAGTGGCGCCATTACGGC

>768

GTGATAAGCAATGTGATTCAAACAAATTCATTCACTTCAATTCAATGCAGGTTTTTTTT  
TTTTTTTGTGAGACGGGCTGTCATGCTGTTGCCAACCCCTGGAGAGCAGTGGCGCCATTAC  
GGCTCACTGCAGCCTCCTGGGC

>769

TTCATTCAATTCAATGCAGGTTTTTTTTTTTTTTTGTGAGACGGGCTGTCATGCTGTTGCC  
AACCCCTGGAGAGCAGTGGCGCCATTACGGCTCACTGCAGCCTCCTGGGCTCAAGCAAT  
TCTCCCTCCTCAGCTTCCCAAG

>770

CACTTCAATTCAATGCAGGTTTTTTTTTTTTTTTGTGAGACGGGCTGTCATGCTGTTGCCAA  
CCCTGGAGAGCAGTGGCGCCATTACGGCTCACTGCAGCCTCCTGGGCTCAAGCAATTC  
TCCCTCCTCAGCTTCCCAAGTA

>771

TTTTTTTGAGACGGGCTGTCATGCTGTTGCCAACCTGGAGAGCAGTGGCGCCATTAC  
GGCTCACTGCAGCCTCCTGGGCTCAAGCAATTCTCCCTCCTCAGCTTCCCAAGTAGCT  
GGGACTACAGGTGCATGCCACCAT

>772

CTGTCATGCTGTTGCCAACCTGGAGAGCAGTGGCGCCATTACGGCTCACTGCAGCCT  
CCTGGGCTCAAGCAATTCTCCCTCCTCAGCTTCCCAAGTAGCTGGGACTACAGGTGCA  
TGCCACCATGTTTCAGCTCATTTAT

>773

ACCCTGGAGAGCAGTGGCGCCATTACGGCTCACTGCAGCCTCCTGGGCTCAAGCAATT  
CTCCCTCCTCAGCTTCCCAAGTAGCTGGGACTACAGGTGCATGCCACCATGTTTCAGCTC  
ATTTATTTTTTATTTTTTTGTAG

>774

AGCAGTGGCGCCATTACGGCTCACTGCAGCCTCCTGGGCTCAAGCAATTCTCCCTCCT  
CAGCTTCCCAAGTAGCTGGGACTACAGGTGCATGCCACCATGTTTCAGCTCATTTATTTT  
TTATTTTTTTGTAGACAGGAGGT

>775

ACGGCTCACTGCAGCCTCCTGGGCTCAAGCAATTCTCCCTCCTCAGCTTCCCAAGTAG  
CTGGGACTACAGGTGCATGCCACCATGTTTCAGCTCATTTATTTTTTATTTTTTTGTAGAC  
AGGAGGTCTCACTATGTTACCC

>776

GGGCTCAAGCAATTCTCCCTCCTCAGCTTCCCAAGTAGCTGGGACTACAGGTGCATGC  
CACCATGTTTCAGCTCATTTATTTTTTATTTTTTTGTAGACAGGAGGTCTCACTATGTTACC  
CAGGCTGCTGTCCAAGTCCTG

>777

CTTCCCAAGTAGCTGGGACTACAGGTGCATGCCACCATGTTTCAGCTCATTTATTTTTTAT  
TTTTTTGTAGACAGGAGGTCTCACTATGTTACCCAGGCTGCTGTCCAAGTCCTGGGCTC  
ACGTGATTCTCCCGCCTCAGC

>778

CCAAGTAGCTGGGACTACAGGTGCATGCCACCATGTTTCAGCTCATTTATTTTTTATTTTT  
TTGTAGACAGGAGGTCTCACTATGTTACCCAGGCTGCTGTCCAAGTCCTGGGCTCACG  
TGATTCTCCCGCCTCAGCCTCC

>779

GCATGCCACCATGTTTCAGCTCATTTATTTTTTATTTTTTTGTAGACAGGAGGTCTCACTAT  
GTTACCCAGGCTGCTGTCCAAGTCCTGGGCTCACGTGATTCTCCCGCCTCAGCCTCCCA  
AAATGCTGGGATTACAGGCG

>780

GACAGGAGGTCTCACTATGTTACCCAGGCTGCTGTCCAAGTCCTGGGCTCACGTGATT  
CTCCCGCCTCAGCCTCCCAAAATGCTGGGATTACAGGCGTAAGCCACCATGCCCAGAC  
AATTTAATAAATATTTATTAAC

>781

CAGGCTGCTGTCCAAGTCCTGGGCTCACGTGATTCTCCCGCCTCAGCCTCCCAAAATG  
CTGGGATTACAGGCGTAAGCCACCATGCCCAGACAATTTAATAAATATTTATTAACCTT  
CTAGGATATTGAGAAAAGCTTG

>782

GGGCTCACGTGATTCTCCCGCCTCAGCCTCCCAAAATGCTGGGATTACAGGCGTAAGC  
CACCATGCCCAGACAATTTAATAAATATTTATTA AAACTTCTAGGATATTGAGAAAAGCT  
TGGTTCTAGGCCACTGGGGAAG

>783

AAAATGCTGGGATTACAGGCGTAAGCCACCATGCCCAGACAATTTAATAAATATTTATTA  
AAACTTCTAGGATATTGAGAAAAGCTTGGTTCTAGGCCACTGGGGAAGACATCAACTG  
AAACAGCCCAGTTATACTCTCA

>784

GGATTACAGGCGTAAGCCACCATGCCCAGACAATTTAATAAATATTTATTA AAACTTCTA  
GGATATTGAGAAAAGCTTGGTTCTAGGCCACTGGGGAAGACATCAACTGAAACAGCCC  
AGTTATACTCTCAATTAGCTGT

>785

CCACCATGCCCAGACAATTTAATAAATATTTATTA AAACTTCTAGGATATTGAGAAAAGC  
TTGGTTCTAGGCCACTGGGGAAGACATCAACTGAAACAGCCCAGTTATACTCTCAATTA  
GCTGTATACAATTAAATTCAC

>786

ACAATTTAATAAATATTTATTA AAACTTCTAGGATATTGAGAAAAGCTTGGTTCTAGGCC  
ACTGGGGAAGACATCAACTGAAACAGCCCAGTTATACTCTCAATTAGCTGTATACAATT  
AAATTCACAGATATCCTCAAC

>787

TTATTA AAACTTCTAGGATATTGAGAAAAGCTTGGTTCTAGGCCACTGGGGAAGACATC  
AACTGAAACAGCCCAGTTATACTCTCAATTAGCTGTATACAATTAAATTCACAGATATCC  
TCAACCCTTATCCATATCCCA

>788

CACTGGGGAAGACATCAACTGAAACAGCCCAGTTATACTCTCAATTAGCTGTATACAAT  
TAAATTCACAGATATCCTCAACCCTTATCCATATCCCATTCATCTTTCAAAGGTTGGTGAA  
AAACCTCATAGCACAAAGAAT

>789

CAATTAGCTGTATACAATTAAATTCACAGATATCCTCAACCCTTATCCATATCCCATTCAT  
CTTTCAAAGGTTGGTGAAAACCTCATAGCACAAAGAATTCTGCCCTAAATGTTTGAATA  
CAGAATGGTCCCCTCTCTCC

>790

AAATTCACAGATATCCTCAACCCTTATCCATATCCCATTCATCTTTCAAAGGTTGGTGAA  
AACCTCATAGCACAAAGAATTCTGCCCTAAATGTTTGAATACAGAATGGTCCCCTCTCT  
CCCTAATTCCTAAAATATTTG

>791

CAGATATCCTCAACCCTTATCCATATCCCATTCATCTTTCAAAGGTTGGTGAAAACCTCA  
TAGCACAAAGAATTCTGCCCTAAATGTTTGAATACAGAATGGTCCCCTCTCTCCCTAAT  
TCCTAAAATATTTGGTCTCTA

>792

CCATTCATCTTTCAAAGGTTGGTGAAAACCTCATAGCACAAAGAATTCTGCCCTAAATG  
TTTGAATACAGAATGGTCCCCTCTCTCCCTAATTCCTAAAATATTTGGTCTCTATGTTTCAT  
TCATTCATTCATGCATGCAT

>793

CCTCTCTCCCTAATTCCTAAAATATTTGGTCTCTATGTTTCATTCATTCATTCATGCATGCAT  
GCTTTCAGTTAGTTCATCGACAAACATTTACATCTACTCTGTTTGACAGTGTGCTAGGCT  
CTGGGGCTTGGGAGTGGA

>794

TCTCCCTAATTCCTAAAATATTTGGTCTCTATGTTTCATTCATTCATTCATGCATGCATGCTT  
TCAGTTAGTTCATCGACAAACATTTACATCTACTCTGTTTGACAGTGTGCTAGGCTCTG  
GGGCTTGGGAGTGGAATA

>795

TTCATTCATTCATGCATGCATGCTTTCAGTTAGTTCATCGACAAACATTTACATCTACTCT  
GTTTGACAGTGTGCTAGGCTCTGGGGCTTGGGAGTGGAATACTAAATTGAACAAGAC  
TGAGGCCTTGCCTTCCAGAAA

>796

TCAGTTAGTTCATCGACAAACATTTACATCTACTCTGTTTGACAGTGTGCTAGGCTCTG  
GGGCTTGGGAGTGGAATACTAAATTGAACAAGACTGAGGCCTTGCCTTCCAGAACT  
CACAAAGGAGTGGGTGGTCAGAA

>797

TTTACATCTACTCTGTTTGACAGTGTGCTAGGCTCTGGGGCTTGGGAGTGGAATACTA  
AATTGAACAAGACTGAGGCCTTGCCTTCCAGAACTCACAAAGGAGTGGGTGGTCAG  
AATGCACATGACTCAGTCAGATAT

>798

CAGTGTGCTAGGCTCTGGGGCTTGGGAGTGGAATACTAAATTGAACAAGACTGAGGC  
CTTGCCTTCCAGAACTCACAAAGGAGTGGGTGGTCAGAATGCACATGACTCAGTCA  
GATATAAGGCAGATGGTGGTAAATA

>799

CTCTGGGGCTTGGGAGTGGAATACTAAATTGAACAAGACTGAGGCCTTGCCTTCCAG  
AACTCACAAAGGAGTGGGTGGTCAGAATGCACATGACTCAGTCAGATATAAGGCAGA  
TGGTGGTAAATACTATGATAAATG

>800

TGGGGCTTGGGAGTGGAATACTAAATTGAACAAGACTGAGGCCTTGCCTTCCAGAAA  
CTCACAAAGGAGTGGGTGGTCAGAATGCACATGACTCAGTCAGATATAAGGCAGATGG  
TGGTAAATACTATGATAAATGTTT

>801

AGTGGAATACTAAATTGAACAAGACTGAGGCCTTGCCTTCCAGAACTCACAAAGG  
AGTGGGTGGTCAGAATGCACATGACTCAGTCAGATATAAGGCAGATGGTGGTAAATACT  
ATGATAAATGTTTATGATAGTGCTA

>802

GAGGCCTTGCCTTCCAGAACTCACAAAGGAGTGGGTGGTCAGAATGCACATGACTC  
AGTCAGATATAAGGCAGATGGTGGTAAATACTATGATAAATGTTTATGATAGTGCTAAGG  
GGCTTATGGAGAATGGGAGAAATT

>803

GGTGGTCAGAATGCACATGACTCAGTCAGATATAAGGCAGATGGTGGTAAATACTATGA  
TAAATGTTTATGATAGTGCTAAGGGGCTTATGGAGAATGGGAGAAATTAAATCTGACTCA  
AGGGTGGGTGGAGAAGATTACA

>804

GTCAGAATGCACATGACTCAGTCAGATATAAGGCAGATGGTGGTAAATACTATGATAAA  
TGTTTCAGATAGTGCTAAGGGGCTTATGGAGAATGGGAGAAATTAAATCTGACTCAAGG  
GTGGGTGGAGAAGATTACATCCA

>805

ATAAGGCAGATGGTGGTAAATACTATGATAAATGTTTCAGATAGTGCTAAGGGGCTTATG  
GAGAATGGGAGAAATTAAATCTGACTCAAGGGTGGGTGGAGAAGATTACATCCAAGAT  
CCAGCAATGACTTCCAGAAGAGA

>806

ATACTATGATAAATGTTTCAGATAGTGCTAAGGGGCTTATGGAGAATGGGAGAAATTAAA  
TCTGACTCAAGGGTGGGTGGAGAAGATTACATCCAAGATCCAGCAATGACTTCCAGAA  
GAGACAAATGAACCTGGCCTGGC

>807

AATGTTTCAGATAGTGCTAAGGGGCTTATGGAGAATGGGAGAAATTAAATCTGACTCAA  
GGGTGGGTGGAGAAGATTACATCCAAGATCCAGCAATGACTTCCAGAAGAGACAAAT  
GAACCTGGCCTGGCAAGGGAGGCAG

>808

CTAAGGGGCTTATGGAGAATGGGAGAAATTAAATCTGACTCAAGGGTGGGTGGAGAA  
GATTACATCCAAGATCCAGCAATGACTTCCAGAAGAGACAAATGAACCTGGCCTGGCA  
AGGGAGGCAGAGTCAAAGTGTCTGG

>809

GAGAAATTAAATCTGACTCAAGGGTGGGTGGAGAAGATTACATCCAAGATCCAGCAAT  
GACTTCCAGAAGAGACAAATGAACCTGGCCTGGCAAGGGAGGCAGAGTCAAAGTGTCT  
TGGCTCAAAGCCCACCACAGCCTTG

>810

GAAATTAAATCTGACTCAAGGGTGGGTGGAGAAGATTACATCCAAGATCCAGCAATGA  
CTTCCAGAAGAGACAAATGAACCTGGCCTGGCAAGGGAGGCAGAGTCAAAGTGTCTG  
GCTCAAAGCCCACCACAGCCTTGGC

>811

GGGTGGAGAAGATTACATCCAAGATCCAGCAATGACTTCCAGAAGAGACAAATGAAC  
CTGGCCTGGCAAGGGAGGCAGAGTCAAAGTGTCTGGCTCAAAGCCCACCACAGCCTT  
GGCTCACAGGCATCTCCCGGTCTTCC

>812

AAGATTACATCCAAGATCCAGCAATGACTTCCAGAAGAGACAAATGAACCTGGCCTGG  
CAAGGGAGGCAGAGTCAAAGTGTCTGGCTCAAAGCCCACCACAGCCTTGGCTCACAG  
GCATCTCCCGGTCTTCCACTCACTC

>813

AGAAGAGACAAATGAACCTGGCCTGGCAAGGGAGGCAGAGTCAAAGTGTCTGGCTC  
AAAGCCCACCACAGCCTTGGCTCACAGGCATCTCCCGGTCTTCCACTCACTCAGTCCT  
TTCAGGGAAAGGCACTGAGCTTTTCT

>814

GAACCTGGCCTGGCAAGGGAGGCAGAGTCAAAGTGTCTGGCTCAAAGCCCACCACAG  
CCTTGGCTCACAGGCATCTCCCGGTCTTCCACTCACTCAGTCCTTTCAGGGAAAGGCA  
CTGAGCTTTTCTCAAGGGAGAACTC



>815

TCAAAGTGTCTGGCTCAAAGCCCACCACAGCCTTGGCTCACAGGCATCTCCCGGTCTT  
CCACTCACTCAGTCCTTTTCAGGGAAAGGCACTGAGCTTTTCTCAAGGGAGAACTCCAA  
AGACGTCTTTCATTTTCATCTTACA

>816

CAAAGCCCACCACAGCCTTGGCTCACAGGCATCTCCCGGTCTTCCACTCACTCAGTCC  
TTTCAGGGAAAGGCACTGAGCTTTTCTCAAGGGAGAACTCCAAAGACGTCTTTCATTT  
CATCTTACAAATCCACACAAATTT

>817

ACCACAGCCTTGGCTCACAGGCATCTCCCGGTCTTCCACTCACTCAGTCCTTTTCAGGG  
AAAGGCACTGAGCTTTTCTCAAGGGAGAACTCCAAAGACGTCTTTCATTTTCATCTTAC  
AAATCCACACAAATTTGCAATTCC

>818

GGCTCACAGGCATCTCCCGGTCTTCCACTCACTCAGTCCTTTTCAGGGAAAGGCACTGA  
GCTTTTCTCAAGGGAGAACTCCAAAGACGTCTTTCATTTTCATCTTACAAATCCACACAA  
ATTTGCAATTCCACTCCACAAGA

>819

TCCCGGTCTTCCACTCACTCAGTCCTTTTCAGGGAAAGGCACTGAGCTTTTCTCAAGGG  
AGAACTCCAAAGACGTCTTTCATTTTCATCTTACAAATCCACACAAATTTGCAATTCCAC  
TCCACAAGATACGAGCATTTGTC

>820

GGGAGAACTCCAAAGACGTCTTTCATTTTCATCTTACAAATCCACACAAATTTGCAATTC  
CACTCCACAAGATACGAGCATTTGTCTTGCTATAATTTTAATATGATTGGCATAAATTACC  
TGTTATCAAGTAAAATAGTT

>821

CTCCAAAGACGTCTTTCATTTTCATCTTACAAATCCACACAAATTTGCAATTCCACTCCA  
CAAGATACGAGCATTTGTCTTGCTATAATTTTAATATGATTGGCATAAATTACCTGTTATC  
AAGTAAAATAGTTTCTTCTT

>822

ACTCCACAAGATACGAGCATTTGTCTTGCTATAATTTTAATATGATTGGCATAAATTACCT  
GTTATCAAGTAAAATAGTTTCTTCTTATGGCTTGTGTGCCCCTGACATACCACTGCTATT  
TGAAAAGAGGCTTCTCCAG

>823

AGATACGAGCATTTGTCTTGCTATAATTTTAATATGATTGGCATAAATTACCTGTTATCAA  
GTAAAATAGTTTCTTCTTATGGCTTGTGTGCCCCTGACATACCACTGCTATTTGAAAAGA  
GGCTTCTCCAGAACTCAG

>824

CCTGTTATCAAGTAAAATAGTTTCTTCTTATGGCTTGTGTGCCCCTGACATACCACTGCT  
ATTTGAAAAGAGGCTTCTCCAGAACTCAGTGTCTGAGAGTACGTGACTGGAAGGTG  
AGTGTTTGCTTACCCCTTGCGTT

>825

TGTTATCAAGTAAAATAGTTTCTTCTTATGGCTTGTGTGCCCCTGACATACCACTGCTAT  
TTGAAAAGAGGCTTCTCCAGAACTCAGTGTCTGAGAGTACGTGACTGGAAGGTGAG  
TGTTTGCTTACCCCTTGCGTTTT

CTGACATACCACTGCTATTTGAAAAGAGGCTTCTCCAGAACTCAGTGTCTGAGAGTA  
CGTGACTGGAAGGTGAGTGTGTTGCTTACCCCTTGCGTTTTCTCCCTGTCAGGATAAATG  
GAATATTCTGCTTTAAGGACCCT

ATACCACTGCTATTTGAAAAGAGGCTTCTCCAGAACTCAGTGTCTGAGAGTACGTGA  
CTGGAAGGTGAGTGTGCTTACCCCTTGCGTTTTCTCCCTGTCAGGATAAATGGAATA  
TTCTGCTTTAAGGACCTAAGTC

AACTCAGTGTCTGAGAGTACGTGACTGGAAGGTGAGTGTTTGCTTACCCCTTGCGTTT  
TCTCCCTGTCAGGATAAATGGAATATTCTGCTTTAAGGACCCTAAGTCTGGCAATATCAT  
GTTTTGTGAACAGCCAACACAG

TGGAAGGTGAGTGTTTGCTTACCCCTTGCGTTTTCTCCCTGTCAGGATAAATGGAATAT  
TCTGCTTTAAGGACCCTAAGTCTGGCAATATCATGTTTTGTGAACAGCCAACACAGTAA  
CTATGGTTGAGGCCTGTATTCTG

AGTGTTTGCTTACCCCTTGCGTTTTCTCCCTGTCAGGATAAATGGAATATTCTGCTTTAA  
GGACCCTAAGTCTGGCAATATCATGTTTTGTGAACAGCCAACACAGTAACTATGGTTGA  
GGCCTGTATTGATGAATGAG

CCCTGTCAGGATAAAAGGAATATTCTGCTTTAAGGACCCTAAGTCTGGCAATATCATGTT  
TTGTGAACAGCCAACACAGTAACTATGGTTGAGGCCTGTATTCGATGAATGAGGTTTTC  
ATATGCTTCTTTACATCAGG

GATAAATGGAATATTCTGCTTTAAGGACCCTAAGTCTGGCAATATCATGTTTTGTGAACA  
GCCAACACAGTAACTATGGTTGAGGCTGTATTGATGAATGAGGTTTTTCATATGCTTCT  
TTCACATCAGGAGAGAGAGA

TCTGCTTTAAGGACCCTAAGTCTGGCAATATCATGTTTTGTGAACAGCCAACACAGTAA  
CTATGGTTGAGGCCTGTATTTCGATGAATGAGGTTTTCATATGCTTCTTTCACATCAGGAG  
AGAGAGAGAGAAAAAAAATA

TCTGGCAATATCATGTTTTGTGAACAGCCAACACAGTAACTATGGTTGAGGCCTGTATT  
CGATGAATGAGGTTTTTCATATGCTTCTTTCACATCAGGAGAGAGAGAGAGAAAAAAA  
ATAATAAACTTGGTAGAGGACGT

GCCAACACAGTAACTATGGTTGAGGCCTGTATTCGATGAATGAGGTTTTCATATGCTTCT  
TTCACATCAGGAGAGAGAGAGAGAAAAAAATAATAAACTTGGTAGAGGACGTGGA  
GTTGTATTTCTGGACTATGGTGG

AACACAGTAACTATGGTTGAGGCCTGTATTCGATGAATGAGGTTTTCATATGCTTCTTTC  
ACATCAGGAGAGAGAGAGAGAGAAAAAAAATAATAAACTTGGTAGAGGACGTGGAGTT  
GTATTTCTGGACTATGGTGGCAC

CACAGTAACTATGGTTGAGGCCTGTATTCGATGAATGAGGTTTTCATATGCTTCTTTCAC  
ATCAGGAGAGAGAGAGAGAAAAAAATAATAAACTTGGTAGAGGACGTGGAGTTGT  
ATTTCTGGACTATGGTGGCACCT

AACTATGGTTGAGGCCTGTATTCGATGAATGAGGTTTTCATATGCTTCTTTCACATCAGG  
AGAGAGAGAGAGAAAAAAATAATAAACTTGGTAGAGGACGTGGAGTTGTATTTCT  
GGACTATGGTGGCACCTCTAAGG

GAATGAGGTTTTCATATGCTTCTTTACATCAGGAGAGAGAGAGAGAGAAAAAAAATAA  
TAAACTTGGTAGAGGACGTGGAGTTGTATTTCTGGACTATGGTGGCACCTCTAAGGAG  
CATGGTTTTCCTTTTGCATGGCTT

GAGAAAAAAAAATAATAAACTTGGTAGAGGACGTGGAGTTGTATTTCTGGACTATGGT  
GGCACCTCTAAGGAGCATGGTTTTCTTTGCATGGCTTTGTCCATTACTATAAACTCC  
TGTTATAAAATAGCTGCCGTGG

AAAAAAAAATAATAAACTTGGTAGAGGACGTGGAGTTGTATTTCTGGACTATGGTGGC  
ACCTCTAAGGAGCATGGTTTTCTTTTGCATGGCTTTGTCCATTACTATAACACTCCTGT  
TATAAAATAGCTGCCGTGGATT

ACCTCTAAGGAGCA TGGTTTTCTTTGCATGGCTTTGTCCATTACTATAACACTCCTGT  
TATAAAATAGCTGCCGTGGATTGAAATCCATAATGTTAACTCAAAAGTTAAGCAGTCCG  
CTATTAAACAGCATAAGAAAC

GTCCATTACTATAACACTCCTGTTATAAAATAGCTGCCGTGGATTGAAATCCATAATGTT  
AACTCAAAAGTTAAGCAGTCCGCTATTAAACAGCATAAGAACTGTTACCTATCCCCTC  
TTCCTGGCCCCCAACAAAGA

TTACTATAACACTCCTGTTATAAAATAGCTGCCGTGGATTGAAATCCATAATGTAACTC  
AAAAGTTAAGCAGTCCGCTATTAAACAGCATAAGAACTGTTACCTATCCCCTCTTCT  
GGCCCCCAACAAAGAAACAG

CTATAACACTCCTGTTATAAAATAGCTGCCGTGGATTGAAATCCATAATGTAACTCAA  
AGTTAAGCAGTCCGCTATTAAACAGCATAAGAACTGTTACCTATCCCCTCTTCCTGGC  
CCCCAACAAGAAACAGCAA

TATAAAATAGCTGCCGTGGATTGAAATCCATAATGTAACTCAAAGTTAAGCAGTCCG  
CTATTAAACAGCATAAGAACTGTTACCTATCCCCTCTTCCTGGCCCCCAACAAAGAA  
ACAGCAAACCTGTTAAAAAAGCC

GTTAAGCAGTCCGCTATTAAACAGCATAAGAACTGTTACCTATCCCCTCTTCCTGGCC  
CCCCAACAAAGAAACAGCAAAGCTGTTAAAAAAGCCCATGTCTCCCCATGAGGACTTG  
GGGTTAATTTTCAGCATGGTGTCT

>848

CAGTCCGCTATTAAACAGCATAAGAACTGTTACCTATCCCCTCTTCCTGGCCCCC  
CAAAGAAACAGCAAACCTGTTAAAAAAGCCCATGTCTCCCCATGAGGACTTGGGGTTAA  
TTTTCAGCATGGTGTCTGGGGAT

>849

AGCATAAGAACTGTTACCTATCCCCTCTTCCTGGCCCCCAACAAAGAAACAGCAAA  
CTGTTAAAAAAGCCCATGTCTCCCCATGAGGACTTGGGGTTAATTTTCAGCATGGTGTCT  
TGGGGATTCTGTGGGACTCC

>850

CCCAACAAAGAAACAGCAAACCTGTTAAAAAAGCCCATGTCTCCCCATGAGGACTTGG  
GGTTAATTTTCAGCATGGTGTCTGGGGATTCTGTGGGACTCCTATTACCCATAATAG  
GACTCATGCTGCTTCATTTTCATG

>851

GAGGACTTGGGGTTAATTTTCAGCATGGTGTCTGGGGATTCTGTGGGACTCCTATT  
ACCCATAATAGGACTCATGCTGCTTCATTTTCATGCACACGATATGGAAAATGCACCCTTC  
CCTAGTGATGAAATTTTAGTT

>852

CTATTACCCATAATAGGACTCATGCTGCTTCATTTTCATGCACACGATATGGAAAATGCAC  
CCTTCCCTAGTGATGAAATTTTAGTTTTGAAATTGAGGCTAGCTTTTGCAGAACAAAGC  
AGATTCCCAGAAACACCAAAA

>853

AGGACTCATGCTGCTTCATTTTCATGCACACGATATGGAAAATGCACCCTTCCCTAGTGA  
TGAAATTTTAGTTTTGAAATTGAGGCTAGCTTTTGCAGAACAAAGCAGATTCCCAGAA  
ACACCAAAAACCTATTCAATGTTG

>854

CTTCATTTTCATGCACACGATATGGAAAATGCACCCTTCCCTAGTGATGAAATTTTAGTTT  
TGAAATTGAGGCTAGCTTTTGCAGAACAAAGCAGATTCCCAGAAACACCAAAAACCTAT  
TCAATGTTGGCCTAGAGCCTGT

>855

TTTCATGCACACGATATGGAAAATGCACCCTTCCCTAGTGATGAAATTTTAGTTTTGAAA  
TTGAGGCTAGCTTTTGCAGAACAAAGCAGATTCCCAGAAACACCAAAAACCTATTCAAT  
GTTGGCCTAGAGCCTGTGTGTC

>856

CCCTTCCCTAGTGATGAAATTTTAGTTTTGAAATTGAGGCTAGCTTTTGCAGAACAAAG  
CAGATTCCCAGAAACACCAAAAACCTATTCAATGTTGGCCTAGAGCCTGTGTGTCCGTG  
CTTAGGTGAGTATGTGTATCTGA

>857

AATTGAGGCTAGCTTTTGCAGAACAAAGCAGATTCCCAGAAACACCAAAAACCTATTCA  
ATGTTGGCCTAGAGCCTGTGTGTCCGTGCTTAGGTGAGTATGTGTATCTGAAAGGGAGA  
AATGCCTTCCTCTAAGTGCGTA

>858

TTGAGGCTAGCTTTTGCAGAACAAAGCAGATTCCCAGAAACACCAAAAACCTATTCAAT  
GTTGGCCTAGAGCCTGTGTGTCCGTGCTTAGGTGAGTATGTGTATCTGAAAGGGAGAA  
AATGCCTTCCTCTAAGTGCGTATG

>859

AGCAGATTCCCAGAAACACCAAAAACTATTCAATGTTGGCCTAGAGCCTGTGTGTCCG  
TGCTTAGGTGAGTATGTGTATCTGAAAGGGAGAAAATGCCTTCCTCTAAGTGCGTATGC  
CCCTCTCAAAGACAATATTCAA

>860

CACCAAAAACTATTCAATGTTGGCCTAGAGCCTGTGTGTCCGTGCTTAGGTGAGTATGT  
GTATCTGAAAGGGAGAAAATGCCTTCCTCTAAGTGCGTATGCCCCTCTCAAAGACAATA  
TTCAAATATCATGCCCGATAGC

>861

AAAACTATTCAATGTTGGCCTAGAGCCTGTGTGTCCGTGCTTAGGTGAGTATGTGTAT  
CTGAAAGGGAGAAAATGCCTTCCTCTAAGTGCGTATGCCCCTCTCAAAGACAATATTCA  
AATATCATGCCCGATAGCTGAC

>862

GCCTAGAGCCTGTGTGTCCGTGCTTAGGTGAGTATGTGTATCTGAAAGGGAGAAAATG  
CCTTCCTCTAAGTGCGTATGCCCCTCTCAAAGACAATATTCAAATATCATGCCCGATAGC  
TGACAGCGGTCAATGGTTGCTA

>863

TGCTTAGGTGAGTATGTGTATCTGAAAGGGAGAAAATGCCTTCCTCTAAGTGCGTATGC  
CCCTCTCAAAGACAATATTCAAATATCATGCCCGATAGCTGACAGCGGTCAATGGTTGC  
TATGCTTCATCCCAAAGCTTTG

>864

GGGAGAAAATGCCTTCCTCTAAGTGCGTATGCCCCTCTCAAAGACAATATTCAAATATC  
ATGCCCGATAGCTGACAGCGGTCAATGGTTGCTATGCTTCATCCCAAAGCTTTGTTAGG  
AACCCCATAAAACCTGGCACAT

>865

AATGCCTTCCTCTAAGTGCGTATGCCCCTCTCAAAGACAATATTCAAATATCATGCCCGA  
TAGCTGACAGCGGTCAATGGTTGCTATGCTTCATCCCAAAGCTTTGTTAGGAACCCCAT  
AAAACCTGGCACATGGTTTGT

>866

CAAAGACAATATTCAAATATCATGCCCGATAGCTGACAGCGGTCAATGGTTGCTATGCT  
TCATCCCAAAGCTTTGTTAGGAACCCCATAAAACCTGGCACATGGTTTGTGACACCA  
GTGAAACACCGTGCTTCTTCCAT

>867

GTTGCTATGCTTCATCCCAAAGCTTTGTTAGGAACCCCATAAAACCTGGCACATGGTTT  
GTGACACCCAGTGAAACACCGTGCTTCTTCCATAATCCTGAGCCCTGCTGCCTGTCA  
TTAAGGGACCTCTCTTATTAAG

>868

ACCCCATAAAACCTGGCACATGGTTTGTGACACCCAGTGAAACACCGTGCTTCTTCCAT  
AATATCCTGAGCCCTGCTGCCTGTCAATTAAGGGACCTCTCTTATTAAGCATCTCTTTTTT  
AAATGGCTGCCATCATCTGGT

>869

TGGTTTGTGACACCCAGTGAAACACCGTGCTTCTTCCATAATATCCTGAGCCCTGCTGC  
CTGTCATTAAGGGACCTCTCTTATTAAGCATCTCTTTTTTAAATGGCTGCCATCATCTGG  
TCCCAGTGATCAATTAATCCC

>870

TGAAACACCGTGCTTCTTCCATAATATCCTGAGCCCTGCTGCCTGTCATTAAGGGACCT  
CTCTTATTAAGCATCTCTTTTTTAAATGGCTGCCATCATCTGGTCCCAGTGTACATTAAAT  
CCCATTATAATTATAAACAC

>871

CTGCCTGTCATTAAGGGACCTCTCTTATTAAGCATCTCTTTTTTAAATGGCTGCCATCAT  
CTGGTCCCAGTGTACATTAAATCCCATTATAATTATAAACACACTTCCCCATAACATTCGT  
TGCAGATCTCACCCCTCAGT

>872

TCATCTGGTCCCAGTGTACATTAAATCCCATTATAATTATAAACACACTTCCCCATAACAT  
TCGTTGCAGATCTCACCCCTCAGTGCCTACCCCCTTAGGGCATCTTTGCACTAATAACAA  
CTCAGATTTGCTATCTGAGT

>873

GTGTACATTAAATCCCATTATAATTATAAACACACTTCCCCATAACATTCGTTGCAGATCT  
CACCCCTCAGTGCCTACCCCCTTAGGGCATCTTTGCACTAATAACAACCTCAGATTTGCTAT  
CTGAGTTGACAACATTAGG

>874

TAACATTCGTTGCAGATCTCACCCCTCAGTGCCTACCCCCTTAGGGCATCTTTGCACTAAT  
AACAACCTCAGATTTGCTATCTGAGTTGACAACATTAGGTCCCAACACCATTTGCAATAT  
GCTGGGGAAAGAGACAGAGAG

>875

GATCTCACCCCTCAGTGCCTACCCCCTTAGGGCATCTTTGCACTAATAACAACCTCAGATT  
TGCTATCTGAGTTGACAACATTAGGTCCCAACACCATTTGCAATATGCTGGGGAAAGAG  
ACAGAGAGAGAAGAAAAAGCTT

>876

AACAACCTCAGATTTGCTATCTGAGTTGACAACATTAGGTCCCAACACCATTTGCAATAT  
GCTGGGGAAAGAGACAGAGAGAGAAGAAAAAGCTTTTTCTTCCTTAATCACGAAGAT  
CTTGGGGTCACAGTGACCCAAGGC

>877

CAACTCAGATTTGCTATCTGAGTTGACAACATTAGGTCCCAACACCATTTGCAATATGC  
TGGGGAAAGAGACAGAGAGAGAAGAAAAAGCTTTTTCTTCCTTAATCACGAAGATCT  
TGGGGTCACAGTGACCCAAGGCCT

>878

GAGTTGACAACATTAGGTCCCAACACCATTTGCAATATGCTGGGGAAAGAGACAGAGA  
GAGAAGAAAAAGCTTTTTCTTCCTTAATCACGAAGATCTTGGGGTCACAGTGACCCAA  
GGCCTCAGGAGCTAAAAAAAAAAAA

>879

GCTGGGGAAAGAGACAGAGAGAGAAGAAAAAGCTTTTTCTTCCTTAATCACGAAGAT  
CTTGGGGTCACAGTGACCCAAGGCCTCAGGAGCTAAAAAAAAAAAAATCCCTCCTCCT  
ACCCTTTTGAAAAGTCACTCTCTACT

>880

AGAGACAGAGAGAGAAGAAAAAGCTTTTTCTTCCTTAATCACGAAGATCTTGGGGTCA  
CAGTGACCCAAGGCCTCAGGAGCTAAAAAAAAAAAAATCCCTCCTCCTACCCTTTTGAA  
AAGTCACTCTCTACTCTACAGATG

>881

TTGGGGTCACAGTGACCCAAGGCCTCAGGAGCTAAAAAAAAAAAAATCCCTCCTCCTA  
CCCTTTTGAAAAGTCACTCTCTACTCTACAGATGAGGGAAGGGCATACTTGGCACCTG  
GGAGAGAACTCAAGTTTGTAACA

>882

AAGGCCTCAGGAGCTAAAAAAAAAAAAATCCCTCCTCCTACCCTTTTGAAAAGTCACTC  
TCTACTCTACAGATGAGGGAAGGGCATACTTGGCACCTGGGAGAGAACTCAAGTTTG  
TAAACACCACTAACCAGGTCTCTG

>883

TCCTCCTACCCTTTTGAAAAGTCACTCTCTACTCTACAGATGAGGGAAGGGCATACTTG  
GCACCTGGGAGAGAACTCAAGTTTGTAACACCACTAACCAGGTCTCTGTTGGTTGG  
GGCGGTGATGGTGGTGGTAGTGG

>884

CTCCTACCCTTTTGAAAAGTCACTCTCTACTCTACAGATGAGGGAAGGGCATACTTGGC  
ACCTGGGAGAGAACTCAAGTTTGTAACACCACTAACCAGGTCTCTGTTGGTTGGGG  
CGGTGATGGTGGTGGTAGTGGTG

>885

TTTTGAAAAGTCACTCTCTACTCTACAGATGAGGGAAGGGCATACTTGGCACCTGGGA  
GAGAACTCAAGTTTGTAACACCACTAACCAGGTCTCTGTTGGTTGGGGCGGTGATG  
GTGGTGGTAGTGGTGGGGTGGGGG

>886

TCTACAGATGAGGGAAGGGCATACTTGGCACCTGGGAGAGAACTCAAGTTTGTAAC  
ACCACTAACCAGGTCTCTGTTGGTTGGGGCGGTGATGGTGGTGGTAGTGGTGGGGTGG  
GGGATGAGGGATGATGGCAATCAC

>887

GAGAGAACTCAAGTTTGTAACACCACTAACCAGGTCTCTGTTGGTTGGGGCGGTGA  
TGGTGGTGGTAGTGGTGGGGTGGGGGATGAGGGATGATGGCAATCACTAATCAAAGAA  
GCTGTCTTATTTGGTTTGCTGAGC

>888

AAACACCACTAACCAGGTCTCTGTTGGTTGGGGCGGTGATGGTGGTGGTAGTGGTGGG  
GTGGGGGATGAGGGATGATGGCAATCACTAATCAAAGAAGCTGTCTTATTTGGTTTGCT  
GAGCCTCAACTAACCGGAATGCA

>889

GGTTGGGGCGGTGATGGTGGTGGTAGTGGTGGGGTGGGGGATGAGGGATGATGGCAA  
TCACTAATCAAAGAAGCTGTCTTATTTGGTTTGCTGAGCCTCAACTAACCGGAATGCAT  
ACATCACCTGATTCTTTCCCCCTC

>890

GTGGTGGGGTGGGGGATGAGGGATGATGGCAATCACTAATCAAAGAAGCTGTCTTATT  
TGTTTTGCTGAGCCTCAACTAACCGGAATGCATACATCACCTGATTCTTTCCCCCTCTG  
CTTTTGGAGGGGGCATCTAAGG

>891

TTGGTTTGCTGAGCCTCAACTAACCGGAATGCATACATCACCTGATTCTTTCCCCCTCT  
GCTTTTTGGAGGGGGCATCTAAGGACATAATGTAAAGAATTAAATTTAAAAACAAA  
AACAAAATGTCAACATATGCAGG

>892

GCCTCAACTAACCGGAATGCATACATCACCTGATTCTTTCCCCCTCTGCTTTTTGGAGG  
GGGCATCTAAGGACATAATGTAAAAGAATTAAAATTTAAAAACAAAAACAAAATGTCA  
ACATATGCAGGAGTAAATTCCAC

>893

AATGCATACATCACCTGATTCTTTCCCCCTCTGCTTTTTGGAGGGGGCATCTAAGGACAT  
AATGTAAAAGAATTAAAATTTAAAAACAAAAACAAAATGTCAACATATGCAGGAGTAA  
ATTCCACTCTGCCTAATTTTTT

>894

GGGGGCATCTAAGGACATAATGTAAAAGAATTAAAATTTAAAAACAAAAACAAAATGT  
CAACATATGCAGGAGTAAATTCCACTCTGCCTAATTTTTTTTTTTTTTTTGAATGAGATC  
TTGTTCTGTCACCCAGGCTGGA

>895

GGCATCTAAGGACATAATGTAAAAGAATTAAAATTTAAAAACAAAAACAAAATGTCAA  
CATATGCAGGAGTAAATTCCACTCTGCCTAATTTTTTTTTTTTTTTTGAATGAGATCTTGT  
TCTGTCACCCAGGCTGGAGGG

>896

AAAAACAAAATGTCAACATATGCAGGAGTAAATTCCACTCTGCCTAATTTTTTTTTTTTTT  
TTGAAATGAGATCTTGTCTGTCACCCAGGCTGGAGGGCAGTGGTGCAATCTCAGCTC  
ACTGCAGCCACCACCTCCCAGG

>897

ATGCAGGAGTAAATTCCACTCTGCCTAATTTTTTTTTTTTTTTTGAATGAGATCTTGTTC  
TGTCACCCAGGCTGGAGGGCAGTGGTGCAATCTCAGCTCACTGCAGCCACCACCTCCC  
AGGTTCAAGCGATTCTCCCGCC

>898

ATTCCACTCTGCCTAATTTTTTTTTTTTTTTTGAATGAGATCTTGTCTGTCACCCAGGC  
TGGAGGGCAGTGGTGCAATCTCAGCTCACTGCAGCCACCACCTCCCAGGTTCAAGCGA  
TTCTCCCGCCTCAGCCCCCTAA

>899

TTTTTTTGAATGAGATCTTGTCTGTCACCCAGGCTGGAGGGCAGTGGTGCAATCTCA  
GCTCACTGCAGCCACCACCTCCCAGGTTCAAGCGATTCTCCCGCCTCAGCCCCCTAAG  
TAGCTGGTATTACAGGCACGTGC

>900

GATCTTGTTCTGTCACCCAGGCTGGAGGGCAGTGGTGCAATCTCAGCTCACTGCAGCC  
ACCACCTCCCAGGTTCAAGCGATTCTCCCGCCTCAGCCCCCTAAGTAGCTGGTATTACA  
GGCACGTGCCACCACGCCTGGCT

>901

TTCTGTCACCCAGGCTGGAGGGCAGTGGTGCAATCTCAGCTCACTGCAGCCACCACCT  
CCCAGGTTCAAGCGATTCTCCCGCCTCAGCCCCCTAAGTAGCTGGTATTACAGGCACGT  
GCCACCACGCCTGGCTAATTTTT

>902

GGTGCAATCTCAGCTCACTGCAGCCACCACCTCCCAGGTTCAAGCGATTCTCCCGCCT  
CAGCCCCCTAAGTAGCTGGTATTACAGGCACGTGCCACCACGCCTGGCTAATTTTTGTA  
TTTTTAGTAGAGATAGGGTTTCA



>903

CACTGCAGCCACCACCTCCCAGGTTCAAGCGATTCTCCCGCCTCAGCCCCCTAAGTAG  
CTGGTATTACAGGCACGTGCCACCACGCCTGGCTAATTTTTGTATTTTAGTAGAGATAG  
GGTTTCACCATGTTGGCCAGGC

>904

GCCTCAGCCCCCTAAGTAGCTGGTATTACAGGCACGTGCCACCACGCCTGGCTAATTTT  
TGTATTTTATAGTAGAGATAGGGTTTCACCATGTTGGCCAGGCTGGTCTCAAACCTCCTGA  
CCTCAAGTGATCCGCCTGCCTC

>905

CCCTAAGTAGCTGGTATTACAGGCACGTGCCACCACGCCTGGCTAATTTTTGTATTTTAT  
GTAGAGATAGGGTTTCACCATGTTGGCCAGGCTGGTCTCAAACCTCCTGACCTCAAGTG  
ATCCGCCTGCCTCGGCCTCCTA

>906

AGGCACGTGCCACCACGCCTGGCTAATTTTTGTATTTTATAGTAGAGATAGGGTTTCACC  
ATGTTGGCCAGGCTGGTCTCAAACCTCCTGACCTCAAGTGATCCGCCTGCCTCGGCCTC  
CTAAAGTGCTGGGAGTACAGGCA

>907

TTTTTGTATTTTATAGTAGAGATAGGGTTTCACCATGTTGGCCAGGCTGGTCTCAAACCTCC  
TGACCTCAAGTGATCCGCCTGCCTCGGCCTCCTAAAGTGCTGGGAGTACAGGCATGAG  
CCACTGCGCCCAGCCTACTCTG

>908

TTCACCATGTTGGCCAGGCTGGTCTCAAACCTCCTGACCTCAAGTGATCCGCCTGCCTC  
GGCCTCCTAAAGTGCTGGGAGTACAGGCATGAGCCACTGCGCCCAGCCTACTCTGCCC  
AATTGTTGACATCACCTACAGCTC

>909

TTGGCCAGGCTGGTCTCAAACCTCCTGACCTCAAGTGATCCGCCTGCCTCGGCCTCCTA  
AAGTGCTGGGAGTACAGGCATGAGCCACTGCGCCCAGCCTACTCTGCCCAATTGTTGA  
CATCACCTACAGCTCTATAGTAGA

>910

GTCTCAAACCTCCTGACCTCAAGTGATCCGCCTGCCTCGGCCTCCTAAAGTGCTGGGAG  
TACAGGCATGAGCCACTGCGCCCAGCCTACTCTGCCCAATTGTTGACATCACCTACAGC  
TCTATAGTAGATGTCTGGAATGA

>911

AAGTGCTGGGAGTACAGGCATGAGCCACTGCGCCCAGCCTACTCTGCCCAATTGTTGA  
CATCACCTACAGCTCTATAGTAGATGTCTGGAATGATGATCTGAAGGACTGTAAGACTG  
TAAGATTTTTTGACTCCAGAAAT

>912

GGAGTACAGGCATGAGCCACTGCGCCCAGCCTACTCTGCCCAATTGTTGACATCACCT  
ACAGCTCTATAGTAGATGTCTGGAATGATGATCTGAAGGACTGTAAGACTGTAAGATTT  
TTTGACTCCAGAAATGGACACAA

>913

CAGCCTACTCTGCCCAATTGTTGACATCACCTACAGCTCTATAGTAGATGTCTGGAATGA  
TGATCTGAAGGACTGTAAGACTGTAAGATTTTTTGACTCCAGAAATGGACACAATAGG  
CTTGCGGTGTCTTCCCCTAACA

>914

TTGTTGACATCACCTACAGCTCTATAGTAGATGTCTGGAATGATGATCTGAAGGACTGT  
AAGACTGTAAGATTTTTTGACTCCAGAAATGGACACAATAGGCTTGCGGTGTCTTCCCC  
TAACAGTCCCTGGCAGGGTAAA

>915

ACAGCTCTATAGTAGATGTCTGGAATGATGATCTGAAGGACTGTAAGACTGTAAGATTT  
TTTGACTCCAGAAATGGACACAATAGGCTTGCGGTGTCTTCCCCTAACAGTCCCTGGC  
AGGGTAAAGGTCTGATGCCCTGG

>916

ATGTCTGGAATGATGATCTGAAGGACTGTAAGACTGTAAGATTTTTTGACTCCAGAAAT  
GGACACAATAGGCTTGCGGTGTCTTCCCCTAACAGTCCCTGGCAGGGTAAAGGTCTGA  
TGCCCTGGTACGTTCCCCAGTGG

>917

ACTGTAAGACTGTAAGATTTTTTGACTCCAGAAATGGACACAATAGGCTTGCGGTGTCT  
TCCCCTAACAGTCCCTGGCAGGGTAAAGGTCTGATGCCCTGGTACGTTCCCCAGTGGC  
AATCTGGAGTTCTCAACTGCAGA

>918

TGTAAGATTTTTTGACTCCAGAAATGGACACAATAGGCTTGCGGTGTCTTCCCCTAACA  
GTCCCTGGCAGGGTAAAGGTCTGATGCCCTGGTACGTTCCCCAGTGGCAATCTGGAGT  
TCTCAACTGCAGAGAATACTTTT

>919

TTTTTTGACTCCAGAAATGGACACAATAGGCTTGCGGTGTCTTCCCCTAACAGTCCCTG  
GCAGGGTAAAGGTCTGATGCCCTGGTACGTTCCCCAGTGGCAATCTGGAGTTCTCAAC  
TGCAGAGAATACTTTTCCTCTAC

>920

TAGGCTTGCGGTGTCTTCCCCTAACAGTCCCTGGCAGGGTAAAGGTCTGATGCCCTGGT  
ACGTTCCCCAGTGGCAATCTGGAGTTCTCAACTGCAGAGAATACTTTTCCTCTACTCAG  
GGGCGTCACTACCTGCATCTCT

>921

GTCCCTGGCAGGGTAAAGGTCTGATGCCCTGGTACGTTCCCCAGTGGCAATCTGGAGT  
TCTCAACTGCAGAGAATACTTTTCCTCTACTCAGGGGCGTCACTACCTGCATCTCTCCC  
TGAACATGCTTCATTTTCCACTC

>922

CCCTGGCAGGGTAAAGGTCTGATGCCCTGGTACGTTCCCCAGTGGCAATCTGGAGTTC  
TCAACTGCAGAGAATACTTTTCCTCTACTCAGGGGCGTCACTACCTGCATCTCTCCCTG  
AACATGCTTCATTTTCCACTCAT

>923

GATGCCCTGGTACGTTCCCCAGTGGCAATCTGGAGTTCTCAACTGCAGAGAATACTTTT  
CCTCTACTCAGGGGCGTCACTACCTGCATCTCTCCCTGAACATGCTTCATTTTCCACTCA  
TCACAAGTTTTTGGGGAAATG

>924

TTTCCTCTACTCAGGGGCGTCACTACCTGCATCTCTCCCTGAACATGCTTCATTTTCCAC  
TCATCACAAGTTTTTGGGGAAATGCAAAGTGGCATCTTCTCCCCAAAAGGTAGGGATC  
TTTGATTTTTTTAATCACGATA

>925

TCACTACCTGCATCTCTCCCTGAACATGCTTCATTTTCCACTCATCACAAGTTTTTGGGG  
AAATGCAAAGTGGCATCTTCTCCCCAAAAGGTAGGGATCTTTGATTTTTTTAATCACGA  
TAGAAAAGTTTACTTTGAAAT

>926

TGAACATGCTTCATTTTCCACTCATCACAAGTTTTTGGGGAAATGCAAAGTGGCATCTT  
CTCCCCAAAAGGTAGGGATCTTTGATTTTTTTAATCACGATAGAAAAGTTTACTTTGAA  
ATAAAAAAATTAAATATATGTT

>927

CATGCTTCATTTTCCACTCATCACAAGTTTTTGGGGAAATGCAAAGTGGCATCTTCTCC  
CCAAAAGGTAGGGATCTTTGATTTTTTTAATCACGATAGAAAAGTTTACTTTGAAATAA  
AAAAATTAAATATATGTTCCAA

>928

TTTTGGGGAAATGCAAAGTGGCATCTTCTCCCCAAAAGGTAGGGATCTTTGATTTTTTT  
AATCACGATAGAAAAGTTTACTTTGAAATAAAAAAATTAAATATATGTTCCAAATTAAG  
AGTTGGAACCTTAAAGAGTTGCA

>929

TTGATTTTTTTAATCACGATAGAAAAGTTTACTTTGAAATAAAAAAATTAAATATATGTT  
CCAAATTAAGAGTTGGAACCTTAAAGAGTTGCAACATTCCATTCATACTCAGATACTCAA  
AACACCACTGTATTCTTCTTC

>930

GATTTTTTTAATCACGATAGAAAAGTTTACTTTGAAATAAAAAAATTAAATATATGTTCC  
AAATTAAGAGTTGGAACCTTAAAGAGTTGCAACATTCCATTCATACTCAGATACTCAAAA  
CACCCTGTATTCTTCTTCCT

>931

AAAAAATTAAATATATGTTCCAAATTAAGAGTTGGAACCTTAAAGAGTTGCAACATTCCA  
TTCATACTCAGATACTCAAAACACCACTGTATTCTTCTTCCTATCTCTTTAGTTGAAGTT  
TTTTTTTGTAATTCAAAGCCC

>932

AAGAGTTGCAACATTCCATTCATACTCAGATACTCAAAACACCACTGTATTCTTCTTCCT  
ATCTCTTTAGTTGAAGTTTTTTTTTGTAATTCAAAGCCCCCTCCCAATTTCTGCCTGAG  
ATTCTGAGGGAGGAGGAAAA

>933

TGCAACATTCCATTCATACTCAGATACTCAAAACACCACTGTATTCTTCTTCCTATCTCT  
TTAGTTGAAGTTTTTTTTTGTAATTCAAAGCCCCCTCCCAATTTCTGCCTGAGATTCTG  
AGGGAGGAGGAAAAGTGTA

>934

CAGATACTCAAAACACCACTGTATTCTTCTTCCTATCTCTTTAGTTGAAGTTTTTTTTTG  
AATTCAAAGCCCCCTCCCAATTTCTGCCTGAGATTCTGAGGGAGGAGGAAAAGTGTA  
AGATCCTGGGGGATCTAAGTC

>935

TCTTCTTCCTATCTCTTTAGTTGAAGTTTTTTTTTGTAATTCAAAGCCCCCTCCCAATTT  
CTGCCTGAGATTCTGAGGGAGGAGGAAAAGTGTAAGATCCTGGGGGATCTAAGTCTCT  
TTACCTGGTGACCAAGCTGAG

>936

TTTAGTTGAAGTTTTTTTTTGTAAATCAAAGCCCCCTCCCCAATTTCTGCCTGAGATTCT  
GAGGGAGGAGGAAAAGTGTAAGATCCTGGGGGATCTAAGTCTCTTTACCTGGTGACCA  
AGCTGAGAACCATTGTCCTC

>937

TTTTTTTTGTAAATCAAAGCCCCCTCCCCAATTTCTGCCTGAGATTCTGAGGGAGGAGG  
AAAAGTGTAAGATCCTGGGGGATCTAAGTCTCTTTACCTGGTGACCAAGCTGAGAACC  
ATTTGGTCCTCAGCTTGGCTGGC

>938

AGCCCCCTCCCCAATTTCTGCCTGAGATTCTGAGGGAGGAGGAAAAGTGTAAGATCCT  
GGGGGATCTAAGTCTCTTTACCTGGTGACCAAGCTGAGAACCATTGTCCTCAGCTT  
GGCTGGCTGCTGCACAGATCTTGG

>939

CTGAGATTCTGAGGGAGGAGGAAAAGTGTAAGATCCTGGGGGATCTAAGTCTCTTTAC  
CTGGTGACCAAGCTGAGAACCATTGTCCTCAGCTTGGCTGGCTGCTGCACAGATCT  
TGGCCTCAGCAGAGTAAGAGAAGA

>940

AAAGTGTAAGATCCTGGGGGATCTAAGTCTCTTTACCTGGTGACCAAGCTGAGAACCA  
TTTGGTCCTCAGCTTGGCTGGCTGCTGCACAGATCTTGGCCTCAGCAGAGTAAGAGAA  
GAAGGAAAATTAAAAGCCCTTGCT

>941

ATCTAAGTCTCTTTACCTGGTGACCAAGCTGAGAACCATTGTCCTCAGCTTGGCTGG  
CTGCTGCACAGATCTTGGCCTCAGCAGAGTAAGAGAAGAAGGAAAATTAAAAGCCCT  
TGCTTCCTTCATCTATTTCACTAG

>942

TACCTGGTGACCAAGCTGAGAACCATTGTCCTCAGCTTGGCTGGCTGCTGCACAGA  
TCTTGGCCTCAGCAGAGTAAGAGAAGAAGGAAAATTAAAAGCCCTTGCTTCCTTCATC  
TATTTCACTAGAGGCTACATAATC

>943

GTCCTCAGCTTGGCTGGCTGCTGCACAGATCTTGGCCTCAGCAGAGTAAGAGAAGAA  
GGAAAATTAAAAGCCCTTGCTTCCTTCATCTATTTCACTAGAGGCTACATAATCTAGAA  
GTAAAGAGCATGAGCTTTGCAGTC

>944

ATCTTGGCCTCAGCAGAGTAAGAGAAGAAGGAAAATTAAAAGCCCTTGCTTCCTTCAT  
CTATTTCACTAGAGGCTACATAATCTAGAAGTTAAGAGCATGAGCTTTGCAGTCAGAAT  
GGTCTGATTTAAAGTTTCAGCTC

>945

AGTAAGAGAAGAAGGAAAATTAAAAGCCCTTGCTTCCTTCATCTATTTCACTAGAGGCT  
ACATAATCTAGAAGTTAAGAGCATGAGCTTTGCAGTCAGAATGGTCTGATTTAAAGTTT  
CAGCTCTGATGTTAATAGATC

>946

AAATTAAAAGCCCTTGCTTCCTTCATCTATTTCACTAGAGGCTACATAATCTAGAAGTTA  
AGAGCATGAGCTTTGCAGTCAGAATGGTCTGATTTAAAGTTTCAGCTCTGATGTTAAT  
AGATCTACAGTCTGCAGTAAG

>947

AGCCCTTGCTTCCTTCATCTATTTCACTAGAGGCTACATAATCTAGAAGTTAAGAGCATG  
AGCTTTGCAGTCAGAATGGTCTGATTTAAAGTTTCAGCTCTGATGTTTAATAGATCTACA  
GTCTGCAGTAAGGCACTTAA

>948

TTTCACTAGAGGCTACATAATCTAGAAGTTAAGAGCATGAGCTTTGCAGTCAGAATGGT  
CTGATTTAAAGTTTCAGCTCTGATGTTTAATAGATCTACAGTCTGCAGTAAGGCACTTAA  
TCTCTCTGAACCTCAGTTTTTC

>949

TAGAAGTTAAGAGCATGAGCTTTGCAGTCAGAATGGTCTGATTTAAAGTTTCAGCTCTG  
ATGTTTAATAGATCTACAGTCTGCAGTAAGGCACTTAATCTCTCTGAACCTCAGTTTTCA  
TGTCCACAGAAATTGGGAAAA

>950

AAGAGCATGAGCTTTGCAGTCAGAATGGTCTGATTTAAAGTTTCAGCTCTGATGTTTAA  
TAGATCTACAGTCTGCAGTAAGGCACTTAATCTCTCTGAACCTCAGTTTTTCATGTCCAC  
AGAAATTGGGAAAATAATAGCA

>951

TGAGCTTTGCAGTCAGAATGGTCTGATTTAAAGTTTCAGCTCTGATGTTTAATAGATCTA  
CAGTCTGCAGTAAGGCACTTAATCTCTCTGAACCTCAGTTTTTCATGTCCACAGAAATTG  
GGAAAATAATAGCACCTGCAT

>952

TAAAGTTTCAGCTCTGATGTTTAATAGATCTACAGTCTGCAGTAAGGCACTTAATCTCTC  
TGAACCTCAGTTTTTCATGTCCACAGAAATTGGGAAAATAATAGCACCTGCATTAATAGG  
ATTGTTATGTGGATTAAATAA

>953

AGTCTGCAGTAAGGCACTTAATCTCTCTGAACCTCAGTTTTTCATGTCCACAGAAATTGG  
GAAAATAATAGCACCTGCATTAATAGGATTGTTATGTGGATTAAATAAAACAACATAGGT  
AATGTGTTGAGTTTCGTAGTC

>954

ACTTAATCTCTCTGAACCTCAGTTTTTCATGTCCACAGAAATTGGGAAAATAATAGCACC  
TGCATTAATAGGATTGTTATGTGGATTAAATAAAACAACATAGGTAATGTGTTGAGTTTC  
GTAGTCAGTGCTCAGAATGAG

>955

CACAGAAATTGGGAAAATAATAGCACCTGCATTAATAGGATTGTTATGTGGATTAAATAA  
AACACATAGGTAATGTGTTGAGTTTCGTAGTCAGTGCTCAGAATGAGTTATTATTTTCG  
CTGTCTCCTTCCTGTATGAT

>956

AAAATAATAGCACCTGCATTAATAGGATTGTTATGTGGATTAAATAAAACAACATAGGTA  
ATGTGTTGAGTTTCGTAGTCAGTGCTCAGAATGAGTTATTATTTTCGCTGTCTCCTTCCT  
GTATGATCTCTTAGAACTGC

>957

AGCACCTGCATTAATAGGATTGTTATGTGGATTAAATAAAACAACATAGGTAATGTGTTG  
AGTTTCGTAGTCAGTGCTCAGAATGAGTTATTATTTTCGCTGTCTCCTTCCTGTATGATC  
TCTTAGAACTGCTATACCCT

>958

GATTGTTATGTGGATTAAATAAAACAACATAGGTAATGTGTTGAGTTTCGTAGTCAGTG  
CTCAGAATGAGTTATTATTTTCGCTGTCTCCTTCCTGTATGATCTCTTAGAACTGCTATAC  
CCTCCTGTTCCACTAACTGA

>959

GTTGAGTTTCGTAGTCAGTGCTCAGAATGAGTTATTATTTTCGCTGTCTCCTTCCTGTAT  
GATCTCTTAGAACTGCTATACCCTCCTGTTCCACTAACTGAGCTCTGAAAGGCTGCCAG  
TGGTGGGAGGTACATGGGTAA

>960

TATTATTTTCGCTGTCTCCTTCCTGTATGATCTCTTAGAACTGCTATACCCTCCTGTTCCA  
CTAACTGAGCTCTGAAAGGCTGCCAGTGGTGGGAGGTACATGGGTAAAGAGGGAGAT  
GAGGGAGTAAGATTTAGCAATG

>961

CCTTCCTGTATGATCTCTTAGAACTGCTATACCCTCCTGTTCCACTAACTGAGCTCTGAA  
AGGCTGCCAGTGGTGGGAGGTACATGGGTAAAGAGGGAGATGAGGGAGTAAGATTTA  
GCAATGGAATTCCATGCAAAGGC

>962

ATGATCTCTTAGAACTGCTATACCCTCCTGTTCCACTAACTGAGCTCTGAAAGGCTGCC  
AGTGGTGGGAGGTACATGGGTAAAGAGGGAGATGAGGGAGTAAGATTTAGCAATGGA  
ATTCCATGCAAAGGCCAGCTCATC

>963

CTGCTATACCCTCCTGTTCCACTAACTGAGCTCTGAAAGGCTGCCAGTGGTGGGAGGT  
ACATGGGTAAAGAGGGAGATGAGGGAGTAAGATTTAGCAATGGAATTCCATGCAAAGG  
CCAGCTCATCTATTCCTCTGTCTC

>964

CTGAGCTCTGAAAGGCTGCCAGTGGTGGGAGGTACATGGGTAAAGAGGGAGATGAGG  
GAGTAAGATTTAGCAATGGAATTCCATGCAAAGGCCAGCTCATCTATTCCTCTGTCTCT  
AGCATGATCTCCCCCTAAGATTGA

>965

AGTGGTGGGAGGTACATGGGTAAAGAGGGAGATGAGGGAGTAAGATTTAGCAATGGA  
ATTCCATGCAAAGGCCAGCTCATCTATTCCTCTGTCTCTAGCATGATCTCCCCCTAAGAT  
TGAGATCTCCTGTATTTTAGAA

>966

TGGGAGGTACATGGGTAAAGAGGGAGATGAGGGAGTAAGATTTAGCAATGGAATTCCA  
TGCAAAGGCCAGCTCATCTATTCCTCTGTCTCTAGCATGATCTCCCCCTAAGATTGAGAT  
CTCCTGTATTTTAGAACTGAT

>967

GAGATGAGGGAGTAAGATTTAGCAATGGAATTCCATGCAAAGGCCAGCTCATCTATTCC  
TCTGTCTCTAGCATGATCTCCCCCTAAGATTGAGATCTCCTGTATTTTAGAACTGATAC  
CCAGGTTTCCCTTAAAAGACG

>968

AATGGAATTCCATGCAAAGGCCAGCTCATCTATTCCTCTGTCTCTAGCATGATCTCCCC  
TAAGATTGAGATCTCCTGTATTTTAGAACTGATACCCAGGTTTCCCTTAAAAGACGTT  
CAAGAAAAAATGTAAAAGAA

>969

AGGCCAGCTCATCTATTCCTCTGTCTCTAGCATGATCTCCCCCTAAGATTGAGATCTCCT  
GTATTTTGTAGAACTGATACCCAGGTTTCCCTTAAAAGACGCTTCAAGAAAAAATGTAAA  
AGAAAAATCACTCTAAATACA

>970

TATTCCTCTGTCTCTAGCATGATCTCCCCCTAAGATTGAGATCTCCTGTATTTTGTAGAACT  
GATACCCAGGTTTCCCTTAAAAGACGCTTCAAGAAAAAATGTAAAAGAAAAATCACTC  
TAAATACACGAACATGAGAGA

>971

AGATCTCCTGTATTTTGTAGAACTGATACCCAGGTTTCCCTTAAAAGACGCTTCAAGAAA  
AAATGTAAAAGAAAAATCACTCTAAATACACGAACATGAGAGAGACAGAAAGAGAGC  
GGGCATGTGCGCGCGAGAGAGATT

>972

CAGGTTTCCCTTAAAAGACGCTTCAAGAAAAAATGTAAAAGAAAAATCACTCTAAATA  
CACGAACATGAGAGAGACAGAAAGAGAGCGGGCATGTGCGCGCGAGAGAGATTGAG  
TATTCTCTTGTAATTTTCCATCCTGC

>973

AAGACGCTTCAAGAAAAAATGTAAAAGAAAAATCACTCTAAATACACGAACATGAGA  
GAGACAGAAAGAGAGCGGGCATGTGCGCGCGAGAGAGATTGAGTATTCTCTTGTAATT  
TTCCATCCTGCTTGTTTTTAGGTGC

>974

GTAAAAGAAAAATCACTCTAAATACACGAACATGAGAGAGACAGAAAGAGAGCGGGC  
ATGTGCGCGCGAGAGAGATTGAGTATTCTCTTGTAATTTTCCATCCTGCTTGTTTTTAGG  
TGCTGCCATATGAAATCTCTGAA

>975

AAAAGAAAAATCACTCTAAATACACGAACATGAGAGAGACAGAAAGAGAGCGGGCAT  
GTGCGCGCGAGAGAGATTGAGTATTCTCTTGTAATTTTCCATCCTGCTTGTTTTTAGGTG  
CTGCCATATGAAATCTCTGAACT

>976

AGAGAGCGGGCATGTGCGCGCGAGAGAGATTGAGTATTCTCTTGTAATTTTCCATCCTG  
CTTGTTTTTAGGTGCTGCCATATGAAATCTCTGAACTGAGGAGTCTCATCAGCCTTCCC  
AGGACCCAAGGACATAGCTCTG

>977

TTGAGTATTCTCTTGTAATTTTCCATCCTGCTTGTTTTTAGGTGCTGCCATATGAAATCTC  
TGAAGTGAAGAGTCTCATCAGCCTTCCCAGGACCCAAGGACATAGCTCTGGCTATAAA  
TGGTGCCAGTTTTGGTGGGGG

>978

AGTATTCTCTTGTAATTTTCCATCCTGCTTGTTTTTAGGTGCTGCCATATGAAATCTCTGA  
ACTGAGGAGTCTCATCAGCCTTCCCAGGACCCAAGGACATAGCTCTGGCTATAAATGG  
TGCCAGTTTTGGTGGGGGAGC

>979

TTTAGGTGCTGCCATATGAAATCTCTGAACTGAGGAGTCTCATCAGCCTTCCCAGGACC  
CAAGGACATAGCTCTGGCTATAAATGGTGCCAGTTTTGGTGGGGGAGCTGCTGCTGCTT  
TATCTGGGCCCAATAAACCTTA

>980

CTCTGAACTGAGGAGTCTCATCAGCCTTCCCAGGACCCAAGGACATAGCTCTGGCTAT  
AAATGGTGCCAGTTTTTGGTGGGGGAGCTGCTGCTGCTTTATCTGGGCCCAATAAACCTT  
ATCAAACCTGCTGTGCAGCCAGCC

>981

GTCTCATCAGCCTTCCCAGGACCCAAGGACATAGCTCTGGCTATAAATGGTGCCAGTTT  
TGGTGGGGGAGCTGCTGCTGCTTTATCTGGGCCCAATAAACCTTATCAAACCTGCTGTGC  
AGCCAGCCTTCAGCGCTAAGTG

>982

TGCCAGTTTTTGGTGGGGGAGCTGCTGCTGCTTTATCTGGGCCCAATAAACCTTATCAA  
CTGCTGTGCAGCCAGCCTTCAGCGCTAAGTGGAATGCTTGGAGCCCAATGCTGGCAT  
TCAGCCCACAGCCTCGCCTGCCT

>983

AGTTTTTGGTGGGGGAGCTGCTGCTGCTTTATCTGGGCCCAATAAACCTTATCAAACCTGC  
TGTGCAGCCAGCCTTCAGCGCTAAGTGGAATGCTTGGAGCCCAATGCTGGCATTAG  
CCCACAGCCTCGCCTGCCTTCTT

>984

ATCTGGGCCCAATAAACCTTATCAAACCTGCTGTGCAGCCAGCCTTCAGCGCTAAGTGG  
AAATGCTTGGAGCCCAATGCTGGCATTAGCCCACAGCCTCGCCTGCCTTCTTCCTTTT  
TGTTACCTTCTCCACCTCTTAA

>985

TTATCAAACCTGCTGTGCAGCCAGCCTTCAGCGCTAAGTGGAATGCTTGGAGCCCAAT  
GCTGGCATTAGCCCACAGCCTCGCCTGCCTTCTTCCTTTTTGTTACCTTCTCCACCTCT  
TAAATTCAGGCATTAATCTCTC

>986

ACTGCTGTGCAGCCAGCCTTCAGCGCTAAGTGGAATGCTTGGAGCCCAATGCTGGCA  
TTCAGCCCACAGCCTCGCCTGCCTTCTTCCTTTTTGTTACCTTCTCCACCTCTTAAATTC  
AGGCATTAATCTCTCTTTAACA

>987

TGCTGGCATTAGCCCACAGCCTCGCCTGCCTTCTTCCTTTTTGTTACCTTCTCCACCTC  
TTAAATTCAGGCATTAATCTCTCTTTAACACTTACTAACAAGGGCTGGGCTTTTAATGGG  
CAGCGTTTATGAAGCAAGGG

>988

TCTTCCTTTTTGTTACCTTCTCCACCTCTTAAATTCAGGCATTAATCTCTCTTTAACA  
CTTACTAACAAGGGCTGGGCTTTTAATGGGCAGCGTTTATGAAGCAAGGGAGATTTTACA  
TAGAGTGAATATGGCACGGGG

>989

CCACCTCTTAAATTCAGGCATTAATCTCTCTTTAACACTTACTAACAAGGGCTGGGCTTT  
TAATGGGCAGCGTTTATGAAGCAAGGGAGATTTTCACATAGAGTGAATATGGCACGGG  
GGTGGGGAGGCCAGGGCCATAG

>990

ATTCAGGCATTAATCTCTCTTTAACACTTACTAACAAGGGCTGGGCTTTTAATGGGCAG  
CGTTTATGAAGCAAGGGAGATTTTCACATAGAGTGAATATGGCACGGGGGTGGGGAGG  
CCAGGGCCATAGAGGATTGTGCT



>991

TTAACACTTACTAACAAGGGCTGGGCTTTTAATGGGCAGCGTTTATGAAGCAAGGGAG  
ATTTTCACATAGAGTGAATATGGCACGGGGGTGGGGAGGCCAGGGCCATAGAGGATTG  
TGCTTTCTCTCCCATTGTTTCCAG

>992

TTTTAATGGGCAGCGTTTATGAAGCAAGGGAGATTTTCACATAGAGTGAATATGGCACG  
GGGGTGGGGAGGCCAGGGCCATAGAGGATTGTGCTTTCTCTCCCATTGTTTCCAGAGA  
TTCTCTCTTTCTCTGATTTGAGG

>993

ATGGGCAGCGTTTATGAAGCAAGGGAGATTTTCACATAGAGTGAATATGGCACGGGGG  
TGGGGAGGCCAGGGCCATAGAGGATTGTGCTTTCTCTCCCATTGTTTCCAGAGATTCTC  
TCTTTCTCTGATTTGAGGATTAA

>994

AGTGAATATGGCACGGGGGTGGGGAGGCCAGGGCCATAGAGGATTGTGCTTTCTCTCC  
CATTGTTTCCAGAGATTCTCTCTTTCTCTGATTTGAGGATTAATAGGAGATTAGGATCAG  
GGGTTAATTGTGTGCTTCTCCT

>995

GGCCAGGGCCATAGAGGATTGTGCTTTCTCTCCCATTGTTTCCAGAGATTCTCTCTTTCT  
CTGATTTGAGGATTAATAGGAGATTAGGATCAGGGGTAAATTGTGTGCTTCTCCTGCTAC  
TGCACTGAGGAGAGGCTGGT

>996

CATAGAGGATTGTGCTTTCTCTCCCATTGTTTCCAGAGATTCTCTCTTTCTCTGATTTGA  
GGATTAATAGGAGATTAGGATCAGGGGTAAATTGTGTGCTTCTCCTGCTACTGCACTGA  
GGAGAGGCTGGTAGGTGGATG

>997

TCTGATTTGAGGATTAATAGGAGATTAGGATCAGGGGTAAATTGTGTGCTTCTCCTGCTA  
CTGCACTGAGGAGAGGCTGGTAGGTGGATGTGGACAGCAAAGCGGAAACCTACAGCA  
GGCACTATCTAGGCAGAAGCTCA

>998

GATTTGAGGATTAATAGGAGATTAGGATCAGGGGTAAATTGTGTGCTTCTCCTGCTACTG  
CACTGAGGAGAGGCTGGTAGGTGGATGTGGACAGCAAAGCGGAAACCTACAGCAGGC  
ACTATCTAGGCAGAAGCTCAACA

>999

GGATCAGGGGTAAATTGTGTGCTTCTCCTGCTACTGCACTGAGGAGAGGCTGGTAGGT  
GGATGTGGACAGCAAAGCGGAAACCTACAGCAGGCACTATCTAGGCAGAAGCTCAAC  
AAGTGTAGTGATTCTTTCTTCTGTT

>1000

GTGCTTCTCCTGCTACTGCACTGAGGAGAGGCTGGTAGGTGGATGTGGACAGCAAAGC  
GGAAACCTACAGCAGGCACTATCTAGGCAGAAGCTCAACAAGTGTAGTGATTCTTTCT  
TCTGTTTCCCTGGTGAGGCACCAG

>1001

CTTCTCCTGCTACTGCACTGAGGAGAGGCTGGTAGGTGGATGTGGACAGCAAAGCGG  
AAACCTACAGCAGGCACTATCTAGGCAGAAGCTCAACAAGTGTAGTGATTCTTTCTTCT  
GTTTCCCTGGTGAGGCACCAGGAG

>1002

ACTGCACTGAGGAGAGGCTGGTAGGTGGATGTGGACAGCAAAGCGGAAACCTACAGC  
AGGCACTATCTAGGCAGAAGCTCAACAAGTGTAGTGATTCTTTCTTCTGTTTCCCTGGT  
GAGGCACCAGGAGGGTCTTTTCTC

>1003

GCTGGTAGGTGGATGTGGACAGCAAAGCGGAAACCTACAGCAGGCACTATCTAGGCA  
GAAGCTCAACAAGTGTAGTGATTCTTTCTTCTGTTTCCCTGGTGAGGCACCAGGAGGG  
TCTTTTCTCCTCTCCTTACATCCCT

>1004

CCTACAGCAGGCACTATCTAGGCAGAAGCTCAACAAGTGTAGTGATTCTTTCTTCTGTT  
TCCCTGGTGAGGCACCAGGAGGGTCTTTTCTCCTCTCCTTACATCCCTCCACTCTTGCT  
CTCCTTGCAGCCCAGTTCTTTC

>1005

CAGGCACTATCTAGGCAGAAGCTCAACAAGTGTAGTGATTCTTTCTTCTGTTTCCCTGG  
TGAGGCACCAGGAGGGTCTTTTCTCCTCTCCTTACATCCCTCCACTCTTGCTCTCCTTG  
CAGCCCAGTTCTTTCCTAACTT

>1006

TTCCCTGGTGAGGCACCAGGAGGGTCTTTTCTCCTCTCCTTACATCCCTCCACTCTTGCT  
TCTCCTTGCAGCCCAGTTCTTTCCTAACTTTCTTTAAATCCCTTTCCTCTAACAGGGTGT  
ATAGACCTTAGTTAGAAAAAC

>1007

TGGTGAGGCACCAGGAGGGTCTTTTCTCCTCTCCTTACATCCCTCCACTCTTGCTCTCC  
TTGCAGCCCAGTTCTTTCCTAACTTTCTTTAAATCCCTTTCCTCTAACAGGGTGTATAGA  
CCTTAGTTAGAAAAACAGGTA

>1008

TCCCTCCACTCTTGCTCTCCTTGCAGCCCAGTTCTTTCCTAACTTTCTTTAAATCCCTTT  
CCTCTAACAGGGTGTATAGACCTTAGTTAGAAAAACAGGTAGTCTCTAAATGGGATTGCT  
TCTTTATTGTTAATGAAATGA

>1009

CTCCTTGCAGCCCAGTTCTTTCCTAACTTTCTTTAAATCCCTTTCCTCTAACAGGGTGTA  
TAGACCTTAGTTAGAAAAACAGGTAGTCTCTAAATGGGATTGCTCTTTATTGTTAATGA  
AATGAATACCCAGGGACTGGG

>1010

TTGCAGCCCAGTTCTTTCCTAACTTTCTTTAAATCCCTTTCCTCTAACAGGGTGTATAGA  
CCTTAGTTAGAAAAACAGGTAGTCTCTAAATGGGATTGCTCTTTATTGTTAATGAAATG  
AATACCCAGGGACTGGGCTTC

>1011

CAGTTCTTTCCTAACTTTCTTTAAATCCCTTTCCTCTAACAGGGTGTATAGACCTTAGTT  
AGAAAAACAGGTAGTCTCTAAATGGGATTGCTCTTTATTGTTAATGAAATGAATACCCA  
GGGACTGGGCTTCCCTCCGC

>1012

GACCTTAGTTAGAAAAACAGGTAGTCTCTAAATGGGATTGCTCTTTATTGTTAATGAAA  
TGAATACCCAGGGACTGGGCTTCCCTCCGCTTGCCCTGGGTTTGATGTGGTTGTATCC  
CGTGCTATCAGAGGAGCCCTTC

>1013

TGAATACCCAGGGACTGGGCTTCCCCTCCGCTTGCCCTGGGTTTGATGTGGTTGTATCC  
CGTGCTATCAGAGGAGCCCTTCCTTCACTCAAGTGTGTTCCCCTGCCAGCTCTCTCCG  
CAGACTCCTGCTGGGCTGAGCT

>1014

AATACCCAGGGACTGGGCTTCCCCTCCGCTTGCCCTGGGTTTGATGTGGTTGTATCCCG  
TGCTATCAGAGGAGCCCTTCCTTCACTCAAGTGTGTTCCCCTGCCAGCTCTCTCCGCA  
GACTCCTGCTGGGCTGAGCTTT

>1015

CCCCTCCGCTTGCCCTGGGTTTGATGTGGTTGTATCCCGTGCTATCAGAGGAGCCCTTC  
CTTCACTCAAGTGTGTTCCCCTGCCAGCTCTCTCCGCAGACTCCTGCTGGGCTGAGC  
TTTCCCCTGCTCTTAAGAGTCAGG

>1016

GGTTTGATGTGGTTGTATCCCGTGCTATCAGAGGAGCCCTTCCTTCACTCAAGTGTGTT  
CCCCTGCCAGCTCTCTCCGCAGACTCCTGCTGGGCTGAGCTTTCCCTGCTCTTAAGAG  
TCAGGAGTGGCTCTTGCTGGGA

>1017

AGAGGAGCCCTTCCTTCACTCAAGTGTGTTCCCCTGCCAGCTCTCTCCGCAGACTCC  
TGCTGGGCTGAGCTTTCCCTGCTCTTAAGAGTCAGGAGTGGCTCTTGCTGGGATGGAA  
TGACCCGTCTTTGGGGCTGCCTCA

>1018

ACTCAAGTGTGTTCCCCTGCCAGCTCTCTCCGCAGACTCCTGCTGGGCTGAGCTTTC  
CCTGCTCTTAAGAGTCAGGAGTGGCTCTTGCTGGGATGGAATGACCCGTCTTTGGGGC  
TGCCTCATGAGCGGCTCTTGTA

>1019

CCCTGCTCTTAAGAGTCAGGAGTGGCTCTTGCTGGGATGGAATGACCCGTCTTTGGGG  
CTGCCTCATGAGCGGCTCTTGTAACCCGGATCAGTTCCGATGTGTAAACTCTACCGCC  
TGGCCTTCAGCGAACAGATACAG

>1020

GGCTCTTGCTGGGATGGAATGACCCGTCTTTGGGGCTGCCTCATGAGCGGCTCTTGTA  
AACCCGGATCAGTTCCGATGTGTAAACTCTACCGCCTGGCCTTCAGCGAACAGATACA  
GATTTCTGCCACCTTCCATGACCC

>1021

GCTGCCTCATGAGCGGCTCTTGTAACCCGGATCAGTTCCGATGTGTAAACTCTACCGC  
CTGGCCTTCAGCGAACAGATACAGATTTCTGCCACCTTCCATGACCCTACAGTTCATGG  
GACTGGGTCTGGGGCAGTGCCA

>1022

CATGAGCGGCTCTTGTAACCCGGATCAGTTCCGATGTGTAAACTCTACCGCCTGGCCT  
TCAGCGAACAGATACAGATTTCTGCCACCTTCCATGACCCTACAGTTCATGGGACTGGG  
TCTGGGGCAGTGCCAGAGGCAC

>1023

ATGTGTAAACTCTACCGCCTGGCCTTCAGCGAACAGATACAGATTTCTGCCACCTTCCA  
TGACCCTACAGTTCATGGGACTGGGTCTGGGGCAGTGCCAGAGGCACGCATGGAGGT  
GTGATTCTAGGTGAGTCCTGCGGA

>1024  
TTCAGCGAACAGATACAGATTTCTGCCACCTTCCATGACCCTACAGTTCATGGGACTGG  
GTCTGGGGCAGTGCCAGAGGCACGCATGGAGGTGTGATTCTAGGTGAGTCCTGCGGA  
AAACCTCTGGCCCACCCGTGAGTC

>1025  
GAACAGATACAGATTTCTGCCACCTTCCATGACCCTACAGTTCATGGGACTGGGTCTGG  
GGCAGTGCCAGAGGCACGCATGGAGGTGTGATTCTAGGTGAGTCCTGCGGAAAACCT  
CTGGCCCACCCGTGAGTCACGGAC

>1026  
CCATGACCCTACAGTTCATGGGACTGGGTCTGGGGCAGTGCCAGAGGCACGCATGGAG  
GTGTGATTCTAGGTGAGTCCTGCGGAAAACCTCTGGCCCACCCGTGAGTCACGGACAG  
AACATGCAGACTCGGGCCTTGGTG

>1027  
ACCCTACAGTTCATGGGACTGGGTCTGGGGCAGTGCCAGAGGCACGCATGGAGGTGT  
GATTCTAGGTGAGTCCTGCGGAAAACCTCTGGCCCACCCGTGAGTCACGGACAGAACA  
TGCAGACTCGGGCCTTGGTGACATA

>1028  
AGTGCCAGAGGCACGCATGGAGGTGTGATTCTAGGTGAGTCCTGCGGAAAACCTCTG  
GCCACCCGTGAGTCACGGACAGAACATGCAGACTCGGGCCTTGGTGACATAAGCTCC  
GCATTGCTAAAACCGCGTGACCTCG

>1029  
GCACGCATGGAGGTGTGATTCTAGGTGAGTCCTGCGGAAAACCTCTGGCCCACCCGTG  
AGTCACGGACAGAACATGCAGACTCGGGCCTTGGTGACATAAGCTCCGCATTGCTAAA  
ACCGCGTGACCTCGAGGGCTGACT

>1030  
CTGCGGAAAACCTCTGGCCCACCCGTGAGTCACGGACAGAACATGCAGACTCGGGCC  
TTGGTGACATAAGCTCCGCATTGCTAAAACCGCGTGACCTCGAGGGGCTGACTGGCCTG  
AGAACCCTGGATGGCGCTCTCGGCC

>1031  
ACGGACAGAACATGCAGACTCGGGCCTTGGTGACATAAGCTCCGCATTGCTAAAACCG  
CGTGACCTCGAGGGGCTGACTGGCCTGAGAACCCTGGATGGCGCTCTCGGCCACCCCC  
ACCTCCCACCCCAACCTCCTGGGCT

>1032  
GACTCGGGCCTTGGTGACATAAGCTCCGCATTGCTAAAACCGCGTGACCTCGAGGGCT  
GACTGGCCTGAGAACCCTGGATGGCGCTCTCGGCCACCCCCACCTCCCACCCCAACCT  
CCTGGGCTTCGGTCAGAATCCACA

>1033  
GGCCTGAGAACCCTGGATGGCGCTCTCGGCCACCCCCACCTCCCACCCCAACCTCCTG  
GGCTTCGGTCAGAATCCACAGCCCGTGCCCGAAGAGCGCTTCCCGCCTCTGGCACCT  
ACCTTCGCTCAGCTCCAGGGAAAA

>1034  
ACCCTGGATGGCGCTCTCGGCCACCCCCACCTCCCACCCCAACCTCCTGGGCTTCGGT  
CAGAATCCACAGCCCGTGCCCGAAGAGCGCTTCCCGCCTCTGGCACCTACCTTCGCT  
CAGCTCCAGGGAAAAGGGGAGAGG

>1035

CTCTCGGCCACCCCCACCTCCCACCCCAACCTCCTGGGCTTCGGTCAGAATCCACAGC  
CCGTGCCCCGAAGAGCGCTTCCCGCCTCTGGCACCCCTACCTTCGCTCAGCTCCAGGGAA  
AAGGGGAGAGGGCAGCTTTCTGCA

>1036

GGCTTCGGTCAGAATCCACAGCCCGTGCCCGAAGAGCGCTTCCCGCCTCTGGCACCCCT  
ACCTTCGCTCAGCTCCAGGGAAAAGGGGAGAGGGCAGCTTTCTGCAGTCAGAGGAAG  
AGTACATTTTCTTTGGCTGCTCTAC

>1037

GGTCAGAATCCACAGCCCGTGCCCGAAGAGCGCTTCCCGCCTCTGGCACCCCTACCTTC  
GCTCAGCTCCAGGGAAAAGGGGAGAGGGCAGCTTTCTGCAGTCAGAGGAAGAGTACA  
TTTTCTTTGGCTGCTCTACCCTCTG

>1038

ATCCACAGCCCGTGCCCGAAGAGCGCTTCCCGCCTCTGGCACCCCTACCTTCGCTCAGC  
TCCAGGGAAAAGGGGAGAGGGCAGCTTTCTGCAGTCAGAGGAAGAGTACATTTTCTT  
TGGCTGCTCTACCCTCTGAAGTAGG

>1039

GCGCTTCCCGCCTCTGGCACCCCTACCTTCGCTCAGCTCCAGGGAAAAGGGGAGAGGG  
CAGCTTTCTGCAGTCAGAGGAAGAGTACATTTTCTTTGGCTGCTCTACCCTCTGAAGTA  
GGGCGGCCAGCTGAAGGAGGACAC

>1040

AAAGGGGAGAGGGCAGCTTTCTGCAGTCAGAGGAAGAGTACATTTTCTTTGGCTGCTC  
TACCCTCTGAAGTAGGGCGGCCAGCTGAAGGAGGACACACTTTTGAGGGGCCCCAGAG  
GTTGTCCAAGCTTCCCCCTGCCCCC

>1041

GGGGAGAGGGCAGCTTTCTGCAGTCAGAGGAAGAGTACATTTTCTTTGGCTGCTCTAC  
CCTCTGAAGTAGGGCGGCCAGCTGAAGGAGGACACACTTTTGAGGGGCCCAGAGGTT  
GTCCAAGCTTCCCCCTGCCCCCTGA

>1042

GAGTACATTTTCTTTGGCTGCTCTACCCTCTGAAGTAGGGCGGCCAGCTGAAGGAGGA  
CACACTTTTGAGGGGCCCAGAGGTTGTCCAAGCTTCCCCCTGCCCCCTGAAGACTGTG  
CACTGAGCTGGGCGCAGTTCTCGG

>1043

TTTCTTTGGCTGCTCTACCCTCTGAAGTAGGGCGGCCAGCTGAAGGAGGACACACTTT  
TGAGGGGCCCAGAGGTTGTCCAAGCTTCCCCCTGCCCCCTGAAGACTGTGCACTGAG  
CTGGGCGCAGTTCTCGGGAAGTGT

>1044

TCTTTGGCTGCTCTACCCTCTGAAGTAGGGCGGCCAGCTGAAGGAGGACACACTTTTG  
AGGGGCCCAGAGGTTGTCCAAGCTTCCCCCTGCCCCCTGAAGACTGTGCACTGAGCT  
GGGCGCAGTTCTCGGGAAGTGTTC

>1045

CTCTACCCTCTGAAGTAGGGCGGCCAGCTGAAGGAGGACACACTTTTGAGGGGCCCCA  
GAGGTTGTCCAAGCTTCCCCCTGCCCCCTGAAGACTGTGCACTGAGCTGGGCGCAGTT  
CTCGGGAAGTGTTCACCCAGATT

>1046  
CGGCCAGCTGAAGGAGGACACACTTTTGAGGGGGCCCAGAGGTTGTCCAAGCTTCCCC  
CTGCCCCCTGAAGACTGTGCACTGAGCTGGGCGCAGTTCTCGGGAAGTGTTCACCC  
AGATTGCTGGGGGGCGGGGGGGGGT

>1047  
TTTTGAGGGGGCCCAGAGGTTGTCCAAGCTTCCCCCTGCCCCCTGAAGACTGTGCACTG  
AGCTGGGCGCAGTTCTCGGGAAGTGTTCACCCAGATTGCTGGGGGGCGGGGGGGG  
GTGGGATGAGGGCAGAGCCGAGAGG

>1048  
AAGCTTCCCCCTGCCCCCTGAAGACTGTGCACTGAGCTGGGCGCAGTTCTCGGGAAGT  
GTTTCACCCAGATTGCTGGGGGGCGGGGGGGGGTGGGATGAGGGCAGAGCCGAGAG  
GCTGTCCAAGGTTTGGGAGAGAGAA

>1049  
CTGAGCTGGGCGCAGTTCTCGGGAAGTGTTCACCCAGATTGCTGGGGGGCGGGGG  
GGGGTGGGATGAGGGCAGAGCCGAGAGGCTGTCCAAGGTTTGGGAGAGAGAAAAGT  
TTCTCCAGGACTCGACCTTGGCCTCC

>1050  
CTGGGCGCAGTTCTCGGGAAGTGTTCACCCAGATTGCTGGGGGGCGGGGGGGGGT  
GGGATGAGGGCAGAGCCGAGAGGCTGTCCAAGGTTTGGGAGAGAGAAAAGTTTCTCC  
CAGGACTCGACCTTGGCCTCCAGCAA

>1051  
GGGCGCAGTTCTCGGGAAGTGTTCACCCAGATTGCTGGGGGGCGGGGGGGGGTGG  
GATGAGGGCAGAGCCGAGAGGCTGTCCAAGGTTTGGGAGAGAGAAAAGTTTCTCCA  
GACTCGACCTTGGCCTCCAGCAATC

>1052  
CAGTTCTCGGGAAGTGTTCACCCAGATTGCTGGGGGGCGGGGGGGGGTGGGATGA  
GGGCAGAGCCGAGAGGCTGTCCAAGGTTTGGGAGAGAGAAAAGTTTCTCCAGGACT  
CGACCTTGGCCTCCAGCAATCGCGAC

>1053  
ACTGTTTCCACCCAGATTGCTGGGGGGCGGGGGGGGGTGGGATGAGGGCAGAGCCGA  
GAGGCTGTCCAAGGTTTGGGAGAGAGAAAAGTTTCTCCAGGACTCGACCTTGGCCT  
CCAGCAATCGCGACAGCTAAAAACGG

>1054  
GCTGGGGGGCGGGGGGGGGTGGGATGAGGGCAGAGCCGAGAGGCTGTCCAAGGTTT  
GGGAGAGAGAAAAGTTTCTCCAGGACTCGACCTTGGCCTCCAGCAATCGCGACAGC  
TAAAAACGGGTGTCTCGCTTCGACAAT

>1055  
CAGAGCCGAGAGGCTGTCCAAGGTTTGGGAGAGAGAAAAGTTTCTCCAGGACTCGA  
CCTTGGCCTCCAGCAATCGCGACAGCTAAAAACGGGTGTCTCGCTTCGACAATAGATC  
CCCGCGGACCTTCTGGCACCTGGTT

>1056  
GCTGTCCAAGGTTTGGGAGAGAGAAAAGTTTCTCCAGGACTCGACCTTGGCCTCCA  
GCAATCGCGACAGCTAAAAACGGGTGTCTCGCTTCGACAATAGATCCCCGCGGACCTT  
CTGGCACCTGGTTCACTAGCGCCCG

>1057

TCTCCCAGGACTCGACCTTGGCCTCCAGCAATCGCGACAGCTAAAAACGGGTGTCTCG  
CTTCGACAATAGATCCCCGCGGACCTTCTGGCACCTGGTTCCTAGCGCCCGCGAACT  
CTGCCTCGGGAGACTTATTGAAAT

>1058

CGACAGCTAAAAACGGGTGTCTCGCTTCGACAATAGATCCCCGCGGACCTTCTGGCAC  
CTGGTTCCTAGCGCCCGCGAACTCTGCCTCGGGAGACTTATTGAAATCCGGATGCTC  
AAGCCGGGAGGCGCGCAGTAACCA

>1059

CTTCGACAATAGATCCCCGCGGACCTTCTGGCACCTGGTTCCTAGCGCCCGCGAACT  
CTGCCTCGGGAGACTTATTGAAATCCGGATGCTCAAGCCGGGAGGCGCGCAGTAACCA  
GGAGGATGAGAGGGCCGGGTTTGG

>1060

TTCTGGCACCTGGTTCCTAGCGCCCGCGAACTCTGCCTCGGGAGACTTATTGAAATCC  
GGATGCTCAAGCCGGGAGGCGCGCAGTAACCAGGAGGATGAGAGGGCCGGGTTTGGG  
CTAGGAAAGCGGCCTTTTAAACA

>1061

ACCTGGTTCCTAGCGCCCGCGAACTCTGCCTCGGGAGACTTATTGAAATCCGGATGC  
TCAAGCCGGGAGGCGCGCAGTAACCAGGAGGATGAGAGGGCCGGGTTTGGGCTAGGA  
AAGCGGCCTTTTAAACAGATGTCA

>1062

GCCCGCGAACTCTGCCTCGGGAGACTTATTGAAATCCGGATGCTCAAGCCGGGAGGCG  
CGCAGTAACCAGGAGGATGAGAGGGCCGGGTTTGGGCTAGGAAAGCGGCCTTTTAAA  
ACAGATGTCAGGGGGACTGCAGCCC

>1063

TTGAAATCCGGATGCTCAAGCCGGGAGGCGCGCAGTAACCAGGAGGATGAGAGGGCC  
GGGTTTGGGCTAGGAAAGCGGCCTTTTAAACAGATGTCAGGGGGACTGCAGCCCCG  
AGCCATGAGAAAAAAGTTAAAGGCGA

>1064

ATCCGGATGCTCAAGCCGGGAGGCGCGCAGTAACCAGGAGGATGAGAGGGCCGGGTT  
TGGGCTAGGAAAGCGGCCTTTTAAACAGATGTCAGGGGGACTGCAGCCCCGAGCCA  
TGAGAAAAAAGTTAAAGGCGAGATGA

>1065

CGGGAGGCGCGCAGTAACCAGGAGGATGAGAGGGCCGGGTTTGGGCTAGGAAAGCG  
GCCTTTTAAACAGATGTCAGGGGGACTGCAGCCCCGAGCCATGAGAAAAAAGTTAA  
AGGCGAGATGACACGCACTGAATTGGG

>1066

CAGGAGGATGAGAGGGCCGGGTTTGGGCTAGGAAAGCGGCCTTTTAAACAGATGTC  
AGGGGGACTGCAGCCCCGAGCCATGAGAAAAAAGTTAAAGGCGAGATGACACGCACT  
GAATTGGGGCAAACATTGGAAGAGGA

>1067

TTTGGGCTAGGAAAGCGGCCTTTTAAACAGATGTCAGGGGGACTGCAGCCCCGAGC  
CATGAGAAAAAAGTTAAAGGCGAGATGACACGCACTGAATTGGGGCAAACATTGGAA  
GAGGAGACAAAACACTGCGTGCTTGAGC

>1068

CTAGGAAAGCGGCCTTTTAAAACAGATGTCAGGGGGGACTGCAGCCCCGAGCCATGAG  
AAAAAAGTTAAAGGCGAGATGACACGCACTGAATTGGGGCAAACATTGGAAGAGGAG  
ACAAAACCTGCGTGCTTGAGCACCGGG

>1069

AAAGCGGCCTTTTAAAACAGATGTCAGGGGGGACTGCAGCCCCGAGCCATGAGAAAAA  
AGTTAAAGGCGAGATGACACGCACTGAATTGGGGCAAACATTGGAAGAGGAGACAAA  
ACTGCGTGCTTGAGCACCGGGGTGCG

>1070

GCAGCCCCGAGCCATGAGAAAAAAGTTAAAGGCGAGATGACACGCACTGAATTGGGG  
CAAACATTGGAAGAGGAGACAAAACCTGCGTGCTTGAGCACCGGGGTGCGGGGAGGG  
GGGGACAAAACCCGTATCCAGTGCAA

>1071

GTAAAGGCGAGATGACACGCACTGAATTGGGGCAAACATTGGAAGAGGAGACAAAA  
CTGCGTGCTTGAGCACCGGGGTGCGGGGAGGGGGGGACAAAACCCGTATCCAGTGCA  
AATTAAAATCTTGGGAGTAGGTGGGG

>1072

ACGCACTGAATTGGGGCAAACATTGGAAGAGGAGACAAAACCTGCGTGCTTGAGCACC  
GGGGTGCGGGGAGGGGGGGACAAAACCCGTATCCAGTGCAAATTAATCTTGGGAG  
TAGGTGGGGGCTGCTGCGCGCCCTTC

>1073

TGGAAGAGGAGACAAAACCTGCGTGCTTGAGCACCGGGGTGCGGGGAGGGGGGGACA  
AAACCCGTATCCAGTGCAAATTAATCTTGGGAGTAGGTGGGGGCTGCTGCGCGCCC  
TTCACCCTCAGTTCCCCTATTAAGGA

>1074

GTGCTTGAGCACCGGGGTGCGGGGAGGGGGGGACAAAACCCGTATCCAGTGCAAATT  
AAAATCTTGGGAGTAGGTGGGGGCTGCTGCGCGCCCTTCACCCTCAGTTCCCCTATTA  
GGATTCTGAGTCCCCATGCACTCC

>1075

CTTGAGCACCGGGGTGCGGGGAGGGGGGGACAAAACCCGTATCCAGTGCAAATTAAA  
ATCTTGGGAGTAGGTGGGGGCTGCTGCGCGCCCTTCACCCTCAGTTCCCCTATTAAGGA  
TTCTGAGTCCCCATGCACTCCTGT

>1076

AAAACCCGTATCCAGTGCAAATTAATCTTGGGAGTAGGTGGGGGCTGCTGCGCGCC  
CTTCACCCTCAGTTCCCCTATTAAGGATTCTGAGTCCCCATGCACTCCTGTCTCTGGCT  
CCTTCCTTCCTCTCCGCTCGGC

>1077

AGTGCAAATTAATCTTGGGAGTAGGTGGGGGCTGCTGCGCGCCCTTCACCCTCAGT  
TCCCCTATTAAGGATTCTGAGTCCCCATGCACTCCTGTCTCTGGCTCCTTCCTTCCTCT  
CCGCTCGGCCGGTGAGAGGCGG

>1078

TAAATCTTGGGAGTAGGTGGGGGCTGCTGCGCGCCCTTCACCCTCAGTTCCCCTATTA  
AGGATTCTGAGTCCCCATGCACTCCTGTCTCTGGCTCCTTCCTTCCTCTCCGCTCGGC  
CGGTGAGAGGCGGCCGCCGGCG



>1079

ATTAAGGATTCTGAGTCCCCATGCACTCCTGTCTCTGGCTCCTTCCTTCTCTCCGCTC  
GGCCGGTGAGAGGCGGCCGCCGGCGCCCCAGCAGCAGCTAGATGTCAGGCGAAGCCC  
GGAGCGCGGAGCGCGGGGAAGGG

>1080

TAAGGATTCTGAGTCCCCATGCACTCCTGTCTCTGGCTCCTTCCTTCTCTCCGCTCG  
GCCGGTGAGAGGCGGCCGCCGGCGCCCCAGCAGCAGCTAGATGTCAGGCGAAGCCCG  
GAGCGCGGAGCGCGGGGAAGGGAG

>1081

TGCACTCCTGTCTCTGGCTCCTTCCTTCTCTCCGCTCGGCCGGTGAGAGGCGGCCG  
CCGGCGCCCCAGCAGCAGCTAGATGTCAGGCGAAGCCCGGAGCGCGGAGCGCGGGG  
AAGGGAGGGGAAGGGAGGGGAGGGGA

>1082

GCTCCTTCCTTCTCTCCGCTCGGCCGGTGAGAGGCGGCCGCCGGCGCCCCAGCAGCA  
GCTAGATGTCAGGCGAAGCCCGGAGCGCGGAGCGCGGGGAAGGGAGGGGAAGGGAG  
GGGAGGGGAAGGAGGGGTGGGGCGG

>1083

TCGGCCGGTGAGAGGCGGCCGCCGGCGCCCCAGCAGCAGCTAGATGTCAGGCGAAGC  
CCGGAGCGCGGAGCGCGGGGAAGGGAGGGGAAGGGAGGGGAGGGGAAGGAGGGG  
TGGGGCGGGGAGCGCGCGCGGGCTCGGC

>1084

AGAGGCGGCCGCCGGCGCCCCAGCAGCAGCTAGATGTCAGGCGAAGCCCGGAGCGCG  
GAGCGCGGGGAAGGGAGGGGAAGGGAGGGGAGGGGAAGGAGGGGTGGGGCGGGG  
AGCGCGCGGGGCTCGGCCAGTGCGGGG

>1085

GCGGCCGCCGGCGCCCCAGCAGCAGCTAGATGTCAGGCGAAGCCCGGAGCGCGGAGC  
GCGGGGAAGGGAGGGGAAGGGAGGGGAGGGGAAGGAGGGGTGGGGCGGGGAGCG  
CGCGCGGGCTCGGCCAGTGCGGGGTGGT

>1086

CAGCTAGATGTCAGGCGAAGCCCGGAGCGCGGAGCGCGGGGAAGGGAGGGGAAGGG  
AGGGGAGGGGAAGGAGGGGTGGGGCGGGGAGCGCGCGCGGGCTCGGCCAGTGCG  
GGGTGGTGGGCGGGCTGAGCCCGGGGACG

>1087

GGGGAAGGGAGGGGAAGGGAGGGGAGGGGAAGGAGGGGTGGGGCGGGGAGCGCG  
CGCGGGCTCGGCCAGTGCGGGGTGGTGGGCGGGCTGAGCCCGGGGACGGCGCGGGA  
GGGGGAGGGAAGGGGGCAGCTGTGGGC

>1088

GAGGGGAAGGAGGGGTGGGGCGGGGAGCGCGCGCGGGCTCGGCCAGTGCGGGGTG  
GTGGGCGGGCTGAGCCCGGGGACGGCGCGGGAGGGGGGAGGGAAGGGGGGCAGCT  
GTGGGCAGGGAGCCGGGCTCGGCCGCCAG

>1089

GGCGGGGAGCGCGCGCGGGCTCGGCCAGTGCGGGGTGGTGGGCGGGCTGAGCCCGG  
GGACGGCGCGGGAGGGGGGAGGGAAGGGGGGCAGCTGTGGGCAGGGAGCCGGGCT  
CGGCCGCCAGCACTAAAGATGGAGAGGCG

>1090

AGCGCGCGCGGGCTCGGCCAGTGCGGGGTGGTGGGCGGGCTGAGCCCGGGGACGGC  
CGGGGAGGGGGGAGGGAAGGGGGGCAGCTGTGGGCAGGGAGCCGGGCTCGGCCGCC  
AGCACTAAAGATGGAGAGGCGCCGGGGC

>1091

GCGCGGGCTCGGCCAGTGCGGGGTGGTGGGCGGGCTGAGCCCGGGGACGGCGCGGG  
AGGGGGGAGGGAAGGGGGGCAGCTGTGGGCAGGGAGCCGGGCTCGGCCGCCAGCAC  
TAAAGATGGAGAGGCGCCGGGGCCTTGC

>1092

TCGGCCAGTGCGGGGTGGTGGGCGGGCTGAGCCCGGGGACGGCGCGGGAGGGGGGA  
GGGAAGGGGGGCAGCTGTGGGCAGGGAGCCGGGCTCGGCCGCCAGCACTAAAGATG  
GAGAGGCGCCGGGGCCTTGCAGGGGAGG

>1093

CCCGGGGACGGCGCGGGAGGGGGGAGGGAAGGGGGGCAGCTGTGGGCAGGGAGCC  
GGGCTCGGCCGCCAGCACTAAAGATGGAGAGGCGCCGGGGCCTTGCAGGGGAGGGG  
GCTCGGCGTTGACGTGGGACGCGGCGGAG

>1094

GGGAGGGGGGAGGGAAGGGGGGCAGCTGTGGGCAGGGAGCCGGGCTCGGCCGCCAG  
CACTAAAGATGGAGAGGCGCCGGGGCCTTGCAGGGGAGGGGGCTCGGCGTTGACGTG  
GGACGCGGCGGAGGCGCAGCAGCCGGT

>1095

GAGGGGGGAGGGAAGGGGGGCAGCTGTGGGCAGGGAGCCGGGCTCGGCCGCCAGCA  
CTAAAGATGGAGAGGCGCCGGGGCCTTGCAGGGGAGGGGGCTCGGCGTTGACGTGGG  
ACGCGGCGGAGGCGCAGCAGCCGGTGG

>1096

GGGCAGCTGTGGGCAGGGAGCCGGGCTCGGCCGCCAGCACTAAAGATGGAGAGGCG  
CCGGGGCCTTGCAGGGGAGGGGGCTCGGCGTTGACGTGGGACGCGGCGGAGGCGCA  
GCAGCCGGTGGTGATTTGCTAACCTCGC

>1097

CACTAAAGATGGAGAGGCGCCGGGGCCTTGCAGGGGAGGGGGCTCGGCGTTGACGTG  
GGACGCGGCGGAGGCGCAGCAGCCGGTGGTGATTTGCTAACCTCGCAGCAGAGAGGA  
GTTGAGGGCGATGAGAGCGGGTACTG

>1098

AGATGGAGAGGCGCCGGGGCCTTGCAGGGGAGGGGGCTCGGCGTTGACGTGGGACG  
CGGCGGAGGCGCAGCAGCCGGTGGTGATTTGCTAACCTCGCAGCAGAGAGGAGTTGA  
GGGCGATGAGAGCGGGTACTGCGAACT

>1099

TGGAGAGGCGCCGGGGCCTTGCAGGGGAGGGGGCTCGGCGTTGACGTGGGACGCGG  
CGGAGGCGCAGCAGCCGGTGGTGATTTGCTAACCTCGCAGCAGAGAGGAGTTGAGGG  
CGATGAGAGCGGGTACTGCGAACTGCC

>1100

GAGGGGGCTCGGCGTTGACGTGGGACGCGGCGGAGGCGCAGCAGCCGGTGGTGATTT  
GCTAACCTCGCAGCAGAGAGGAGTTGAGGGCGATGAGAGCGGGTACTGCGAACTGCC  
GGGCGATGCTGTCGCTGCCGCCGTGA

>1101

TGACGTGGGACGCGGCGGAGGCGCAGCAGCCGGTGGTGATTTGCTAACCTCGCAGCA  
GAGAGGAGTTGAGGGCGATGAGAGCGGGTACTGCGAACTGCCGGGCGATGCTGTCGC  
TGCCGCCGTGATACGGAGAGCAACAG

>1102

GAGTTGAGGGCGATGAGAGCGGGTACTGCGAACTGCCGGGCGATGCTGTCGCTGCCG  
CCGTGATACGGAGAGCAACAGTTCCCCAGCAACACCCCTCCCCGACACAGGCACACA  
CCCCCGACAGGCACGCACACCCACC

>1103

GTTGAGGGCGATGAGAGCGGGTACTGCGAACTGCCGGGCGATGCTGTCGCTGCCGCC  
GTGATACGGAGAGCAACAGTTCCCCAGCAACACCCCTCCCCGACACAGGCACACACC  
CCCCGACAGGCACGCACACCCACCCC

>1104

GAGCGGGTACTGCGAACTGCCGGGCGATGCTGTCGCTGCCGCCGTGATACGGAGAGC  
AACAGTTCCCCAGCAACACCCCTCCCCGACACAGGCACACACCCCCCGACAGGCACG  
CACACCCACCCACAGTGCCCGGCTC

>1105

GGGCGATGCTGTCGCTGCCGCCGTGATACGGAGAGCAACAGTTCCCCAGCAACACCCC  
TCCCCGACACAGGCACACACCCCCCGACAGGCACGCACACCCACCCACAGTGCCCG  
GCTCGGCTGCGGTGAGTGAGGGGCC

>1106

CGCCGTGATACGGAGAGCAACAGTTCCCCAGCAACACCCCTCCCCGACACAGGCACA  
CACCCCCCGACAGGCACGCACACCCACCCACAGTGCCCGGCTCGGCTGCGGTGAGT  
GAGGGGCCGGAAGAGGCGCACCGCC

>1107

AGTTCCCCAGCAACACCCCTCCCCGACACAGGCACACACCCCCCGACAGGCACGCAC  
ACCCACCCACAGTGCCCGGCTCGGCTGCGGTGAGTGAGGGGCCGGAAGAGGCGC  
ACCGCCAGCGAGCGCCGCGCGCCGGG

>1108

CCGACACAGGCACACACCCCCCGACAGGCACGCACACCCACCCACAGTGCCCGGCT  
CGGCTGCGGTGAGTGAGGGGCCGGAAGAGGCGCACCGCCAGCGAGCGCCGCGCG  
CCGGGGCTTCCCGGGGCTGGAGAGGTC

>1109

ACCCCCGACAGGCACGCACACCCACCCACAGTGCCCGGCTCGGCTGCGGTGAGTG  
AGGGGCCGGAAGAGGCGCACCGCCAGCGAGCGCCGCGCGCCGGGGCTTCCCGGG  
GCTGGAGAGGTCTGGGGGGCGCGCGCT

>1110

CACCCACCCACAGTGCCCGGCTCGGCTGCGGTGAGTGAGGGGCCGGAAGAGGCGC  
ACCGCCAGCGAGCGCCGCGCGCCGGGGCTTCCCGGGGCTGGAGAGGTCTGGGGGGC  
GCGCGCTCGCTTCGGCCACTCGGCCG

>1111

GTGAGTGAGGGGCCGGAAGAGGCGCACCGCCAGCGAGCGCCGCGCGCCGGGGCT  
TCCCGGGGCTGGAGAGGTCTGGGGGGCGCGCGCTCGCTTCGGCCACTCGGCCGCTGG  
GCTTGTGCCTTTTTTATTTGGCGTGTT

>1112

CTCGCTTCGGCCACTCGGCCGCTGGGCTTGTGCCTTTTTTATTTGGCGTGTTCCCTTCCT  
GCCGCTGCAGCCGTGCGCCGCCACCGGTTGGGGGTCGGCTAGAAGGGGGAGCCCCGGC  
TGTCAGCCTGGGCGCAGCTGCCT

>1113

GCCTTTTTTATTTGGCGTGTTCCCTTCCTGCCGCTGCAGCCGTGCGCGCCACCGGTTGG  
GGGTCGGCTAGAAGGGGGAGCCCCGGCTGTCAGCCTGGGCGCAGCTGCCTCCCCAGC  
CCTTCCTCTTCAGGGCACGGTCGG

>1114

TTTTTTATTTGGCGTGTTCCCTTCCTGCCGCTGCAGCCGTGCGCGCCACCGGTTGGGGG  
TCGGCTAGAAGGGGGAGCCCCGGCTGTCAGCCTGGGCGCAGCTGCCTCCCCAGCCCT  
TCCTCTTCAGGGCACGGTCGGGGT

>1115

CTGCAGCCGTGCGCGCCACCGGTTGGGGGTCGGCTAGAAGGGGGAGCCCCGGCTGTC  
AGCCTGGGCGCAGCTGCCTCCCCAGCCCTTCCTCTTCAGGGCACGGTCGGGGTGAGA  
GGTGGGGGGCGTAGCGGTGTGCGGGG

>1116

CCGCCACCGGTTGGGGGTCGGCTAGAAGGGGGAGCCCCGGCTGTCAGCCTGGGCGCA  
GCTGCCTCCCCAGCCCTTCCTCTTCAGGGCACGGTCGGGGTGAGAGGTGGGGGGCGT  
AGCGGTGTGCGGGGGCTGAGGGCGTG

>1117

GGGTCGGCTAGAAGGGGGAGCCCCGGCTGTCAGCCTGGGCGCAGCTGCCTCCCCAGC  
CCTTCCTCTTCAGGGCACGGTCGGGGTGAGAGGTGGGGGGCGTAGCGGTGTGCGGGG  
GCTGAGGGCGTGAGCAGAGGGGTCGG

>1118

GCCTGGGCGCAGCTGCCTCCCCAGCCCTTCCTCTTCAGGGCACGGTCGGGGTGAGAG  
GTGGGGGGCGTAGCGGTGTGCGGGGGCTGAGGGCGTGAGCAGAGGGGGTCGGGGATC  
CGGAGGCTTTGTACCGCCAGGGGCTGG

>1119

CCCCAGCCCTTCCTCTTCAGGGCACGGTCGGGGTGAGAGGTGGGGGGCGTAGCGGTG  
TGCGGGGGCTGAGGGCGTGAGCAGAGGGGTGCGGGATCCGGAGGCTTTGTACCGCCA  
GGGGCTGGCGGAGCAACAGAGCCCGT

>1120

CTTCCTCTTCAGGGCACGGTCGGGGTGAGAGGTGGGGGGCGTAGCGGTGTGCGGGGG  
CTGAGGGCGTGAGCAGAGGGGTGCGGGATCCGGAGGCTTTGTACCGCCAGGGGCTGG  
CGGAGCAACAGAGCCCGTGGGTGCTC

>1121

GGCGTAGCGGTGTGCGGGGGCTGAGGGCGTGAGCAGAGGGGTGCGGGATCCGGAGG  
CTTTGTACCGCCAGGGGCTGGCGGAGCAACAGAGCCCGTGGGTGCTCTTATGTATGCG  
GACCGGTGCGCGGGCGCAAGATAAGG

>1122

TGCGGGGGCTGAGGGCGTGAGCAGAGGGGTGCGGGATCCGGAGGCTTTGTACCGCCA  
GGGGCTGGCGGAGCAACAGAGCCCGTGGGTGCTCTTATGTATGCGGACCGGTGCGCG  
GGCGCAAGATAAGGTTGTGGTTTATT

>1123

CTGAGGGCGTGAGCAGAGGGGTCGGGGATCCGGAGGCTTTGTACCGCCAGGGGCTGG  
CGGAGCAACAGAGCCCCGTGGGTGCTCTTATGTATGCGGACCGGTGCGCGGGCGCAAG  
ATAAGGTTGTGGTTTATTTATTTGTG

>1124

CGCCAGGGGCTGGCGGAGCAACAGAGCCCCGTGGGTGCTCTTATGTATGCGGACCGGT  
GCGCGGGCGCAAGATAAGGTTGTGGTTTATTTATTTGTGTGTTTATTCGCCGGCCGGCT  
GGGAAGCTAGAATCGGAGGAGCTG

>1125

GGGGCTGGCGGAGCAACAGAGCCCCGTGGGTGCTCTTATGTATGCGGACCGGTGCGCG  
GGCGCAAGATAAGGTTGTGGTTTATTTATTTGTGTGTTTATTCGCCGGCCGGCTGGGAA  
GCTAGAATCGGAGGAGCTGACGAG

>1126

CCGGTGCGCGGGCGCAAGATAAGGTTGTGGTTTATTTATTTGTGTGTTTATTCGCCGGC  
CGGCTGGGAAGCTAGAATCGGAGGAGCTGACGAGTAGATCTGGGGGCGGAGGGGAGC  
AGGACTGGGACTGCTTACGTTTTG

>1127

TGCGCGGGCGCAAGATAAGGTTGTGGTTTATTTATTTGTGTGTTTATTCGCCGGCCGGC  
TGGAAGCTAGAATCGGAGGAGCTGACGAGTAGATCTGGGGGCGGAGGGGAGCAGG  
ACTGGGACTGCTTACGTTTTGTTT

>1128

CGCAAGATAAGGTTGTGGTTTATTTATTTGTGTGTTTATTCGCCGGCCGGCTGGGAAGCT  
AGAATCGGAGGAGCTGACGAGTAGATCTGGGGGCGGAGGGGAGCAGGACTGGGACT  
GCTTACGTTTTGTTTCTCTTTGAG

>1129

GTTGTGGTTTATTTATTTGTGTGTTTATTCGCCGGCCGGCTGGGAAGCTAGAATCGGAG  
GAGCTGACGAGTAGATCTGGGGGCGGAGGGGAGCAGGACTGGGACTGCTTACGTTTT  
GTTTCTCTTTGAGAAAACGTGGTG

>1130

GAGCTGACGAGTAGATCTGGGGGCGGAGGGGAGCAGGACTGGGACTGCTTACGTTTT  
GTTTCTCTTTGAGAAAACGTGGTGCGGCTTTTTCTTGATTGGACTTGATCCCCACCCCC  
TTTTGCAGGGGAGGGAGGGAAGCT

>1131

TTTGTCTCTTTGAGAAAACGTGGTGCGGCTTTTTCTTGATTGGACTTGATCCCCACCC  
CCCTTTTGCAGGGGAGGGAGGGAAGCTCCAGAGGGTCTGCAGCGCTGCGGGCCCTCC  
TCGGCTCTCGGCGGGACCGGCGGT

>1132

TTCTCTTTGAGAAAACGTGGTGCGGCTTTTTCTTGATTGGACTTGATCCCCACCCCCCTT  
TTGCAGGGGAGGGAGGGAAGCTCCAGAGGGTCTGCAGCGCTGCGGGCCCTCCTCGGC  
TCTCGGCGGGACCGGCGGTGACAC

>1133

TTTTCTTGATTGGACTTGATCCCCACCCCCCTTTTGCAGGGGAGGGAGGGAAGCTCCA  
GAGGGTCTGCAGCGCTGCGGGCCCTCCTCGGCTCTCGGCGGGACCGGCGGTGACACC  
GGAGCTCGCCGTGCGCTCCCGGCCG

>1134  
GAAGCTCCAGAGGGTCTGCAGCGCTGCGGGCCCTCCTCGGCTCTCGGCGGGACCGGC  
GGTGACACCGGAGCTCGCCGTGCGCTCCCGGCCGCTCTCGGTGGGTGCCGGTCTCTGC  
ACCTGATGCGTTCGGGATGCCTTTC  
>1135  
TCGGTGGGTGCCGGTCTCTGCACCTGATGCGTTCGGGATGCCTTTCCACCCCTGGCGC  
GCCCCGCGCTAGCTCGCACAGCGCCTCGCACACTCCCGCACGCGCTTGAAATGCGCAC  
GGTCCCGCCGGCCCCGCGGAACCAC  
>1136  
GCCGGTCTCTGCACCTGATGCGTTCGGGATGCCTTTCCACCCCTGGCGCGCCCCGCGCT  
AGCTCGCACAGCGCCTCGCACACTCCCGCACGCGCTTGAAATGCGCACGGTCCCGCC  
GGCCCCGCGGAACCACCCGGACGCA  
>1137  
CGCACACTCCCGCACGCGCTTGAAATGCGCACGGTCCCGCCGGCCCCGCGGAACCACC  
CGGACGCACGGAGCGCTCCGCACCGACTCGCTCGCCGCTCCCGAGACGCTCGCAC  
CGTGCTTGGGCCGGGCGCGCTGGCCG  
>1138  
TCCCGCCGGCCCCGCGGAACCACCCGGACGCACGGAGCGCTCCGCACCGACTCGCTCG  
CCGCCTCCCCGAGACGCTCGCACCGTGCTTGGGCCGGGCGCGCTGGCCGCTGGCGCC  
GCTGGCCAGAGGCCTGGGACCCAGCC  
>1139  
CTCGCCGCCTCCCCGAGACGCTCGCACCGTGCTTGGGCCGGGCGCGCTGGCCGCTGG  
CGCCGCTGGCCAGAGGCCTGGGACCCAGCCGGTCGCTCCCAGGGGGTCACGGCCCTG  
GGTCGGAGAGGGAGGGCGGGCAGACC  
>1140  
CGCCGCCTCCCCGAGACGCTCGCACCGTGCTTGGGCCGGGCGCGCTGGCCGCTGGCG  
CCGCTGGCCAGAGGCCTGGGACCCAGCCGGTCGCTCCCAGGGGGTCACGGCCCTGGG  
TCGGAGAGGGAGGGCGGGCAGACCCC  
>1141  
AGACGCTCGCACCGTGCTTGGGCCGGGCGCGCTGGCCGCTGGCGCCGCTGGCCAGAG  
GCCTGGGACCCAGCCGGTCGCTCCCAGGGGGTCACGGCCCTGGGTTCGGAGAGGGAGG  
GCGGGCAGACCCCTTCTCGCCTTTCC  
>1142  
TGCTTGGGCCGGGCGCGCTGGCCGCTGGCGCCGCTGGCCAGAGGCCTGGGACCCAGC  
CGGTGCTCCCAGGGGGTCACGGCCCTGGGTTCGGAGAGGGAGGGCGGGCAGACCCCT  
TCTCGCCTTTCCTCCCAACTCGCT  
>1143  
GCCGCTGGCCAGAGGCCTGGGACCCAGCCGGTCGCTCCCAGGGGGTCACGGCCCTGG  
GTCGGAGAGGGAGGGCGGGCAGACCCCTTCTCGCCTTTCCTCCCAACTCGCTGCG  
GGGCTTTTGTGCTTCCCCTTCGCCGC  
>1144  
CAGAGGCCTGGGACCCAGCCGGTCGCTCCCAGGGGGTCACGGCCCTGGGTTCGGAGAG  
GGAGGGCGGGCAGACCCCTTCTCGCCTTTCCTCCCAACTCGCTGCGGGGGCTTTTGT  
GCTTCCCCTTCGCCGCGGGGCGGGT

>1145

GCTGCGGGGCTTTTGTGCTTCCCCCTTCGCCGCGGGGCGGGTCCGCCTCCCCTGCCGCT  
CTCGCCGCGGAGTCCAGCCCGCCCGGACTGTCGCCGTTCCCTCCCCGTCTCTTTCGCTTT  
CCCTCGTCCCTAGCTCAGCTCTC

>1146

GGGGCTTTTGTGCTTCCCCCTTCGCCGCGGGGCGGGTCCGCCTCCCCTGCCGCTCTCGC  
CGCGGAGTCCAGCCCGCCCGGACTGTCGCCGTTCCCTCCCCGTCTCTTTCGCTTTCCCTC  
GTCCCTAGCTCAGCTCTCCTTCT

>1147

CGCCGCGGAGTCCAGCCCGCCCGGACTGTCGCCGTTCCCTCCCCGTCTCTTTCGCTTTCC  
CTCGTCCCTAGCTCAGCTCTCCTTCTTTCAGGAGTCTAGCTCCTCGGGAAAAGTTGCTT  
CCCCAAGTTTGCTGAAGTCGTC

>1148

CGGAGTCCAGCCCGCCCGGACTGTCGCCGTTCCCTCCCCGTCTCTTTCGCTTTCCCTCGT  
CCCTAGCTCAGCTCTCCTTCTTTCAGGAGTCTAGCTCCTCGGGAAAAGTTGCTTCCCCA  
AGTTTGCTGAAGTCGTCTCCAA

>1149

CCGGACTGTCGCCGTTCCCTCCCCGTCTCTTTCGCTTTCCCTCGTCCCTAGCTCAGCTCT  
CCTTCTTTCAGGAGTCTAGCTCCTCGGGAAAAGTTGCTTCCCCAAGTTTGCTGAAGTC  
GTCTCCAAGTCTCGGTGGGGGTC

>1150

GACTGTCGCCGTTCCCTCCCCGTCTCTTTCGCTTTCCCTCGTCCCTAGCTCAGCTCTCCTT  
CTTTCAGGAGTCTAGCTCCTCGGGAAAAGTTGCTTCCCCAAGTTTGCTGAAGTCGTCT  
CCAAGTCTCGGTGGGGGTCGCT

>1151

CGTCTCTTTCGCTTTCCCTCGTCCCTAGCTCAGCTCTCCTTCTTTCAGGAGTCTAGCTCC  
TCGGGAAAAGTTGCTTCCCCAAGTTTGCTGAAGTCGTCTCCAAGTCTCGGTGGGGGTC  
GCTGGGAACTGGGGGGGTGTGA

>1152

TCTCCTTCTTTCAGGAGTCTAGCTCCTCGGGAAAAGTTGCTTCCCCAAGTTTGCTGAAG  
TCGTCTCCAAGTCTCGGTGGGGGTCGCTGGGAACTGGGGGGGTGTGAGAGCGCGGTC  
GATCCCCGGAGCTCGGGCGGGTTA

>1153

TGCTTCCCCAAGTTTGCTGAAGTCGTCTCCAAGTCTCGGTGGGGGTCGCTGGGAACTG  
GGGGGGTGTGAGAGCGCGGTCGATCCCCGGAGCTCGGGCGGGTTATCGCCGGCTCTTC  
CCGCGCCGCCTGGACTGGACGCT

>1154

AGTCGTCTCCAAGTCTCGGTGGGGGTCGCTGGGAACTGGGGGGGTGTGAGAGCGCGG  
TCGATCCCCGGAGCTCGGGCGGGTTATCGCCGGCTCTTCCCCGCGCCGCCTGGACTGG  
ACGCTGCAGCCAGCGCCAGCCGGAT

>1155

CGGTCGATCCCCGGAGCTCGGGCGGGTTATCGCCGGCTCTTCCCCGCGCCGCCTGGAC  
TGGACGCTGCAGCCAGCGCCAGCCGGATCGCGGGCGCCGAGCGGCGGGTGGGGGAG  
ACGGCTGCCCCGTGGGCGCCCAGATT

>1156

CGATCCCCGGAGCTCGGGCGGGTTATCGCCGGCTCTTCCCCGCGCCGCCTGGACTGGA  
CGCTGCAGCCAGCGCCAGCCGGATCGCGGGCGCCGAGCGGCGGGTGGGGGAGACGG  
CTGCCCCGTGGGCGCCAGATTTC

>1157

CCGGAGCTCGGGCGGGTTATCGCCGGCTCTTCCCCGCGCCGCCTGGACTGGACGCTGC  
AGCCAGCGCCAGCCGGATCGCGGGCGCCGAGCGGCGGGTGGGGGAGACGGCTGCC  
CGTGGGCGCCAGATTTCCTCAGGA

>1158

TCGCCGGCTCTTCCCCGCGCCGCCTGGACTGGACGCTGCAGCCAGCGCCAGCCGGATC  
GCGGGCGCCGAGCGGCGGGTGGGGGAGACGGCTGCCCCGTGGGCGCCAGATTTC  
TCAGGACCCAAAAAGCTTGTTTCAG

>1159

CGCGCCGCCTGGACTGGACGCTGCAGCCAGCGCCAGCCGGATCGCGGGCGCCGAGCG  
GCGGGTGGGGGAGACGGCTGCCCCGTGGGCGCCAGATTTCCTCAGGACCCAAAA  
GCTTGTTTCAGGGCGCCAAGCTTCCA

>1160

CAGCCAGCGCCAGCCGGATCGCGGGCGCCGAGCGGCGGGTGGGGGAGACGGCTGCC  
CCGTGGGCGCCAGATTTCCTCAGGACCCAAAAAGCTTGTTTCAGGGCGCCAAGCTT  
CCATTCTTTGGCTGTTCCCTCCCTA

>1161

AGCCGGATCGCGGGCGCCGAGCGGCGGGTGGGGGAGACGGCTGCCCCGTGGGCGCC  
CAGATTTCCTCAGGACCCAAAAAGCTTGTTTCAGGGCGCCAAGCTTCCATTCTTTG  
GCTGTTCCCTCCCTAGTTCTCAGAAA

>1162

GGGCGCCGAGCGGCGGGTGGGGGAGACGGCTGCCCCGTGGGCGCCAGATTTCCTC  
AGGACCCAAAAAGCTTGTTTCAGGGCGCCAAGCTTCCATTCTTTGGCTGTTCCCTC  
CTAGTTCTCAGAAACCCCGATGTCT

>1163

TTTCCCTCAGGACCCAAAAAGCTTGTTTCAGGGCGCCAAGCTTCCATTCTTTGGCTGT  
TCCCTCCCTAGTTCTCAGAAACCCCGATGTCTGCGGGAAAGCACGCGGTGGCTCGGCT  
CGGCTGAATGGTCATCCCAACCT

>1164

CAGGACCCAAAAAGCTTGTTTCAGGGCGCCAAGCTTCCATTCTTTGGCTGTTCCCTC  
CCTAGTTCTCAGAAACCCCGATGTCTGCGGGAAAGCACGCGGTGGCTCGGCTCGGCTG  
AATGGTCATCCCAACCTTGACGGC

>1165

GGGCGCCAAGCTTCCATTCTTTTGGCTGTTCCCTCCCTAGTTCTCAGAAACCCCGATGT  
CTGCGGGAAAGCACGCGGTGGCTCGGCTCGGCTGAATGGTCATCCCAACCTTGACGG  
CCTCCGTCCCCACCCCGGGGCGGG

>1166

GCGGTGGCTCGGCTCGGCTGAATGGTCATCCCAACCTTGACGGCCTCCGTCCCCACCC  
CGGGGCGGGCAGCAAAAATGTCTTGACCAGCCGTCTGTGAATCCTTTCTGCGTGAGC  
TTGGTGGCTCCTGAACTGATAGAG



>1167

TGAATGGTCATCCCAACCTTGACGGCCTCCGTCCCCACCCCGGGGCGGGCAGCAAAAA  
TGTCTTGACCAGCCGTCCTGTGAATCCTTTCTGCGTGAGCTTGGTGGCTCCTGAACTGA  
TAGAGCTCCTTCTGGGGGTGGAG

>1168

TCCGTCCCCACCCCGGGGCGGGCAGCAAAAATGTCTTGACCAGCCGTCCTGTGAATCC  
TTTCTGCGTGAGCTTGGTGGCTCCTGAACTGATAGAGCTCCTTCTGGGGGTGGAGGCA  
AGCAAGCAGTGTTCTGAAGAGTGAG

>1169

AGCAAAAATGTCTTGACCAGCCGTCCTGTGAATCCTTTCTGCGTGAGCTTGGTGGCTC  
CTGAACTGATAGAGCTCCTTCTGGGGGTGGAGGCAAGCAAGCAGTGTTCTGAAGAGTG  
AGGGAGAGACCTTGCTGTTCCCTTGC

>1170

CAAAAATGTCTTGACCAGCCGTCCTGTGAATCCTTTCTGCGTGAGCTTGGTGGCTCCTG  
AACTGATAGAGCTCCTTCTGGGGGTGGAGGCAAGCAAGCAGTGTTCTGAAGAGTGAGG  
GAGAGACCTTGCTGTTCCCTTGCTC

>1171

CCGTCCTGTGAATCCTTTCTGCGTGAGCTTGGTGGCTCCTGAACTGATAGAGCTCCTTC  
TGGGGGTGGAGGCAAGCAAGCAGTGTTCTGAAGAGTGAGGGAGAGACCTTGCTGTTCC  
TTGCTCTCAGTGCATTCAGTCAA

>1172

CGTGAGCTTGGTGGCTCCTGAACTGATAGAGCTCCTTCTGGGGGTGGAGGCAAGCAA  
GCAGTGTTCTGAAGAGTGAGGGAGAGACCTTGCTGTTCCCTTGCTCTCAGTGCATTCAGT  
GCAATATTGGTCGCTGTAAGACAGA

>1173

TTCTGGGGGTGGAGGCAAGCAAGCAGTGTTCTGAAGAGTGAGGGAGAGACCTTGCTGT  
TCCTTGCTCTCAGTGCATTCAGTCAATATTGGTCGCTGTAAGACAGACACGGGGAGG  
GTCCTGGGCCTGCGCGGTCTTTCTA

>1174

CGAAGAGTGAGGGAGAGACCTTGCTGTTCCCTTGCTCTCAGTGCATTCAGTGCAATATT  
GGTCGCTGTAAGACAGACACGGGGAGGGTCCTGGGCCTGCGCGGTCTTTCTAACACTC  
CTTTAAGCGAGGTTTGGAGTCTAG

>1175

GAGACCTTGCTGTTCCCTTGCTCTCAGTGCATTCAGTGCAATATTGGTCGCTGTAAGACA  
GACACGGGGAGGGTCCTGGGCCTGCGCGGTCTTTCTAACACTCCTTTAAGCGAGGTTT  
GGAGTCTAGGAGCCCTCTTATTG

>1176

ATATTGGTCGCTGTAAGACAGACACGGGGAGGGTCCTGGGCCTGCGCGGTCTTTCTAA  
CACTCCTTTAAGCGAGGTTTGGAGTCTAGGAGCCCTCTTATTGATCCCGGACAGGCTCT  
GGGAGAGGCCTTTGTTTCCCAGC

>1177

GTAAGACAGACACGGGGAGGGTCCTGGGCCTGCGCGGTCTTTCTAACACTCCTTTAAG  
CGAGGTTTGGAGTCTAGGAGCCCTCTTATTGATCCCGGACAGGCTCTGGGAGAGGCCT  
TTGTTTCCCAGCCCTGTCTTCCCT

>1178  
ACAGACACGGGGAGGGTCCTGGGCCTGCGCGGTCTTTCTAACACTCCTTTAAGCGAGG  
TTTGGAGTCTAGGAGCCCTCTTATTGATCCCGGACAGGCTCTGGGAGAGGCCTTTGTTT  
CCCAGCCCTGTCTTCCCTTCGTA

>1179  
GACACGGGGAGGGTCCTGGGCCTGCGCGGTCTTTCTAACACTCCTTTAAGCGAGGTTT  
GGAGTCTAGGAGCCCTCTTATTGATCCCGGACAGGCTCTGGGAGAGGCCTTTGTTTCC  
CAGCCCTGTCTTCCCTTCGTA

>1180  
TGC

>1189

GCTGCCCCCTGGTCACAGGACTTGCAGACTCCTTGGAGCCTGTGGGACACACGTGGAG  
TTCACACACCCAGCCCAGCATGAGCACTCCTGGCTGTAGGGGACCATATTTAACTATGG  
TCTCTCTCCATACCTTAATGACCC

>1190

ACTCCTTGGAGCCTGTGGGACACACGTGGAGTTCACACACCCAGCCCAGCATGAGCA  
CTCCTGGCTGTAGGGGACCATATTTAACTATGGTCTCTCTCCATACCTTAATGACCCATC  
CTTCTTCGTTTTTTTAGATCCTCC

>1191

GCTGTAGGGGACCATATTTAACTATGGTCTCTCTCCATACCTTAATGACCCATCCTTCTT  
CGTTTTTTTAGATCCTCCTGTCCACCGGGCAGTTGTGGGCAGGAGGGTAGGTACGACAC  
CTTACGTAAGTGTGTGTGTGTGTA

>1192

CTATGGTCTCTCTCCATACCTTAATGACCCATCCTTCTTCGTTTTTTTAGATCCTCCTGTCC  
ACCGGGCAGTTGTGGGCAGGAGGGTAGGTACGACACCTTACGTAAGTGTGTGTGTGTGTA  
AACACACACACACTTTTTTTTT

>1193

TCTCCATACCTTAATGACCCATCCTTCTTCGTTTTTTTAGATCCTCCTGTCCACCGGGCAG  
TTGTGGGCAGGAGGGTAGGTACGACACCTTACGTAAGTGTGTGTGTGTGTAACACACAC  
ACACTTTTTTTTTTTTTTTCTG

>1194

TTCGTTTTTTTAGATCCTCCTGTCCACCGGGCAGTTGTGGGCAGGAGGGTAGGTACGAC  
ACCTTACGTAAGTGTGTGTGTGTGTAACACACACACACTTTTTTTTTTTTTTTCTGAGAC  
GGAGTTTGTCTCCTGTTGCCAG

>1195

GGGTAGGTACGACACCTTACGTAAGTGTGTGTGTGTGTAACACACACACACTTTTTTTTTT  
TTTTTTCTGAGACGGAGTTTTGCTCCTGTTGCCAGGCTGGAGTGCAGTGGCGCAATC  
TCGGCTCACGGCAACCTCCGCCT

>1196

GTACGACACCTTACGTAAGTGTGTGTGTGTGTAACACACACACACTTTTTTTTTTTTTTT  
CTGAGACGGAGTTTTGCTCCTGTTGCCAGGCTGGAGTGCAGTGGCGCAATCTCGGCT  
CACGGCAACCTCCGCCTCCCGGT

>1197

TGTGTGTGTGTGTAACACACACACACTTTTTTTTTTTTTTTCTGAGACGGAGTTTGTCTC  
CTGTTGCCAGGCTGGAGTGCAGTGGCGCAATCTCGGCTCACGGCAACCTCCGCCTCC  
CGGTTTCAAGTGATTCTCCTGCC

>1198

GTGTAAACACACACACACTTTTTTTTTTTTTTTCTGAGACGGAGTTTGTCTCCTGTTGC  
CCAGGCTGGAGTGCAGTGGCGCAATCTCGGCTCACGGCAACCTCCGCCTCCCGGTTTC  
AAGTGATTCTCCTGCCTCAGCCT

>1199

TCCTGTTGCCAGGCTGGAGTGCAGTGGCGCAATCTCGGCTCACGGCAACCTCCGCCT  
CCCGGTTTCAAGTGATTCTCCTGCCTCAGCCTCCCGAGTAGCTGGGATTACAGGCGGG  
TGCCACCGCGCCTGGCTAATTTTG

>1200

GAGTGCAGTGGCGCAATCTCGGCTCACGGCAACCTCCGCCTCCCGGTTTCAAGTGATT  
CTCCTGCCTCAGCCTCCCGAGTAGCTGGGATTACAGGCGGGTGCCACCGCGCCTGGCT  
AATTTTGTATTTTTTGTAGAGACG

>1201

GCAATCTCGGCTCACGGCAACCTCCGCCTCCCGGTTTCAAGTGATTCTCCTGCCTCAGC  
CTCCCGAGTAGCTGGGATTACAGGCGGGTGCCACCGCGCCTGGCTAATTTTGTATTTTT  
TGTAGAGACGGGGCTTCTCCAT

>1202

CTCAGCCTCCCGAGTAGCTGGGATTACAGGCGGGTGCCACCGCGCCTGGCTAATTTTGT  
ATTTTTTGTAGAGACGGGGCTTCTCCATGTTGGTCAGGCTGGTCTCGAACTCCCGACCT  
CAGGTGATCCGCCTGCCTGGGC

>1203

CAGCCTCCCGAGTAGCTGGGATTACAGGCGGGTGCCACCGCGCCTGGCTAATTTTGTAT  
TTTTTGTAGAGACGGGGCTTCTCCATGTTGGTCAGGCTGGTCTCGAACTCCCGACCTCA  
GGTGATCCGCCTGCCTGGGCCT

>1204

AATTTTGTATTTTTTGTAGAGACGGGGCTTCTCCATGTTGGTCAGGCTGGTCTCGAACT  
CCCGACCTCAGGTGATCCGCCTGCCTGGGCCTCCCAAAGTGCTGGGATTAGAGGCGTG  
AGCCACCGCGCCCTACCCACAC

>1205

TTCTCCATGTTGGTCAGGCTGGTCTCGAACTCCCGACCTCAGGTGATCCGCCTGCCTGG  
GCCTCCCAAAGTGCTGGGATTAGAGGCGTGAGCCACCGCGCCCTACCCACACACTCT  
TTCTGTCTGTCTCTGGCTGGTGT

>1206

GTCAGGCTGGTCTCGAACTCCCGACCTCAGGTGATCCGCCTGCCTGGGCCTCCCAAAG  
TGCTGGGATTAGAGGCGTGAGCCACCGCGCCCTACCCACACACTCTTTCTGTCTGTCT  
CTGGCTGGTGTACATACACACAG

>1207

CAGGCTGGTCTCGAACTCCCGACCTCAGGTGATCCGCCTGCCTGGGCCTCCCAAAGTG  
CTGGGATTAGAGGCGTGAGCCACCGCGCCCTACCCACACACTCTTTCTGTCTGTCTCT  
GGCTGGTGTACATACACACAGTT

>1208

GTCTCGAACTCCCGACCTCAGGTGATCCGCCTGCCTGGGCCTCCCAAAGTGCTGGGAT  
TAGAGGCGTGAGCCACCGCGCCCTACCCACACACTCTTTCTGTCTGTCTCTGGCTGG  
TGTACATACACACAGTTCAGATTT

>1209

AGGCGTGAGCCACCGCGCCCTACCCACACACTCTTTCTGTCTGTCTCTGGCTGGTGT  
ACATACACACAGTTCAGATTTTATATTATACATAAATACTTTGAGGCTTCCGTGGGTA  
GAAATGACCCAAGTTAGTGTGT

>1210

TGAGCCACCGCGCCCTACCCACACACTCTTTCTGTCTGTCTCTGGCTGGTGTACATAC  
ACACAGTTCAGATTTTATATTATACATAAATACTTTGAGGCTTCCGTGGGTAGAAATG  
ACCCAAGTTAGTGTGTGGTT

>1211

TTCTGTCTGTCTCTGGCTGGTGTACATACACACAGTTCAGATTTTATATTATACATACAAT  
AACTTTGAGGCTTCCGTGGGTAGAAATGACCCAAGTTAGTGTGTGGGTTGTGTGTGTT  
CCTGTTAGTACCTAGGGATGG

>1212

GGCTGGTGTACATACACACAGTTCAGATTTTATATTATACATACAATAACTTTGAGGCTT  
CCGTGGGTAGAAATGACCCAAGTTAGTGTGTGGGTTGTGTGTGTTTCCTGTTAGTACCTA  
GGGATGGGGACAGGCCTTGGG

>1213

TACACACAGTTCAGATTTTATATTATACATACAATAACTTTGAGGCTTCCGTGGGTAGAA  
ATGACCCAAGTTAGTGTGTGGGTTGTGTGTGTTTCCTGTTAGTACCTAGGGATGGGGACA  
GGCCTTGGGTCTGCCAGTGCT

>1214

CACAGTTCAGATTTTATATTATACATACAATAACTTTGAGGCTTCCGTGGGTAGAAATGA  
CCCAAGTTAGTGTGTGGGTTGTGTGTGTTTCCTGTTAGTACCTAGGGATGGGGACAGGC  
CTTGGGTCTGCCAGTGCTTTGC

>1215

CAATAACTTTGAGGCTTCCGTGGGTAGAAATGACCCAAGTTAGTGTGTGGGTTGTGTG  
TGTTTCCTGTTAGTACCTAGGGATGGGGACAGGCCTTGGGTCTGCCAGTGCTTTGCAGC  
CCTGAGAACAGTAGAAGGCCAGAG

>1216

GTGGGTAGAAATGACCCAAGTTAGTGTGTGGGTTGTGTGTGTTTCCTGTTAGTACCTAGG  
GATGGGGACAGGCCTTGGGTCTGCCAGTGCTTTGCAGCCCTGAGAACAGTAGAAGGC  
CAGAGGCCAAGGCTGATGGTGAGA

>1217

CAAGTTAGTGTGTGGGTTGTGTGTGTTTCCTGTTAGTACCTAGGGATGGGGACAGGCCTT  
GGGTCTGCCAGTGCTTTGCAGCCCTGAGAACAGTAGAAGGCCAGAGGCCAAGGCTGA  
TGGTGAGAGGATAGCCTTTGCGGA

>1218

TGTGGGTTGTGTGTGTTTCCTGTTAGTACCTAGGGATGGGGACAGGCCTTGGGTCTGCC  
AGTGCTTTGCAGCCCTGAGAACAGTAGAAGGCCAGAGGCCAAGGCTGATGGTGAGAG  
GATAGCCTTTGCGGAGGAGAGCCCA

>1219

GGGATGGGGACAGGCCTTGGGTCTGCCAGTGCTTTGCAGCCCTGAGAACAGTAGAAG  
GCCAGAGGCCAAGGCTGATGGTGAGAGGATAGCCTTTGCGGAGGAGAGCCCAGTGTC  
CATAGATTTCTGTGGCCATGGCTACA

>1220

GGCCTTGGGTCTGCCAGTGCTTTGCAGCCCTGAGAACAGTAGAAGGCCAGAGGCCAA  
GGCTGATGGTGAGAGGATAGCCTTTGCGGAGGAGAGCCCAGTGTCCATAGATTTCTGT  
GGCCATGGCTACAGGCTCCTGGCCT

>1221

GGTCTGCCAGTGCTTTGCAGCCCTGAGAACAGTAGAAGGCCAGAGGCCAAGGCTGAT  
GGTGAGAGGATAGCCTTTGCGGAGGAGAGCCCAGTGTCCATAGATTTCTGTGGCCATG  
GCTACAGGCTCCTGGCCTCCAATGA

>1222  
CCTGAGAACAGTAGAAGGCCAGAGGCCAAGGCTGATGGTGAGAGGATAGCCTTTGCG  
GAGGAGAGCCCAGTGTCCATAGATTTCTGTGGCCATGGCTACAGGCTCCTGGCCTCCA  
ATGAGTTTGA CTCTGCTTCTGGGGC

>1223  
CTGATGGTGAGAGGATAGCCTTTGCGGAGGAGAGCCCAGTGTCCATAGATTTCTGTGG  
CCATGGCTACAGGCTCCTGGCCTCCAATGAGTTTGA CTCTGCTTCTGGGGCTCCTGTAG  
TGAGGCAGAGTTTGGAAAACTG

>1224  
CTTTGCGGAGGAGAGCCCAGTGTCCATAGATTTCTGTGGCCATGGCTACAGGCTCCTG  
GCCTCCAATGAGTTTGA CTCTGCTTCTGGGGCTCCTGTAGTGAGGCAGAGTTTGGAAA  
AACTGTTTAAAGATAAGGCTTGAC

>1225  
TCTGTGGCCATGGCTACAGGCTCCTGGCCTCCAATGAGTTTGA CTCTGCTTCTGGGGCT  
CCTGTAGTGAGGCAGAGTTTGGAAAACTGTTTAAAGATAAGGCTTGACATCCAGGGG  
GCTGGCGTGAAGCTGACAAGGAA

>1226  
TGGCCATGGCTACAGGCTCCTGGCCTCCAATGAGTTTGA CTCTGCTTCTGGGGCTCCTG  
TAGTGAGGCAGAGTTTGGAAAACTGTTTAAAGATAAGGCTTGACATCCAGGGGGCTG  
GCGTGAAGCTGACAAGGAAGGG

>1227  
GCCTCCAATGAGTTTGA CTCTGCTTCTGGGGCTCCTGTAGTGAGGCAGAGTTTGGAAA  
AACTGTTTAAAGATAAGGCTTGACATCCAGGGGGCTGGCGTGAAGCTGACAAGGAAG  
GGGCTAAAGTCTTGCTAATTTAAG

>1228  
TCTGCTTCTGGGGCTCCTGTAGTGAGGCAGAGTTTGGAAAACTGTTTAAAGATAAGG  
CTTGACATCCAGGGGGCTGGCGTGAAGCTGACAAGGAAGGGGGCTAAAGTCTTGCTAA  
TTTTAAGTAAGTGCACTTCATCATA

>1229  
CCTGTAGTGAGGCAGAGTTTGGAAAACTGTTTAAAGATAAGGCTTGACATCCAGGGG  
GCTGGCGTGAAGCTGACAAGGAAGGGGGCTAAAGTCTTGCTAATTTAAGTAAGTGAC  
TTCATCATAATGAATGTTGGCCTT

>1230  
GAGGCAGAGTTTGGAAAACTGTTTAAAGATAAGGCTTGACATCCAGGGGGCTGGCG  
TGAAGCTGACAAGGAAGGGGGCTAAAGTCTTGCTAATTTAAGTAAGTGCACTTCATCAT  
AATGAATGTTGGCCTTGCTAGGG

>1231  
CAGAGTTTGGAAAACTGTTTAAAGATAAGGCTTGACATCCAGGGGGCTGGCGTGAA  
GCTGACAAGGAAGGGGGCTAAAGTCTTGCTAATTTAAGTAAGTGCACTTCATCATAATG  
AATGTTGGCCTTGCTAGGGAGCC

>1232  
ATAAGGCTTGACATCCAGGGGGCTGGCGTGAAGCTGACAAGGAAGGGGGCTAAAGTCT  
TGCTAATTTAAGTAAGTGCACTTCATCATAATGAATGTTGGCCTTGCTAGGGAGCCCC  
TACTCTCAGACACAGAGAAAGCT

>1233

AGGAAGGGGCTAAAGTCTTGCTAATTTTAAGTAAGTGCACTTCATCATAATGAATGTTG  
GCCTTGCCTAGGGAGCCCCTACTCTCAGACACAGAGAAAGCTGAGGACTTATAGGACT  
TCACTACAATTTTCATTTCACTT

>1234

AGGGGCTAAAGTCTTGCTAATTTTAAGTAAGTGCACTTCATCATAATGAATGTTGGCCTT  
GCCTAGGGAGCCCCTACTCTCAGACACAGAGAAAGCTGAGGACTTATAGGACTTCACT  
ACAATTTTCATTTCACTTCATC

>1235

TTTAAGTAAGTGCACTTCATCATAATGAATGTTGGCCTTGCCTAGGGAGCCCCTACTCTC  
AGACACAGAGAAAGCTGAGGACTTATAGGACTTCACTACAATTTTCATTTCACTTCATC  
TAACAGATGTCATAGAGTAGT

>1236

ATCATAATGAATGTTGGCCTTGCCTAGGGAGCCCCTACTCTCAGACACAGAGAAAGCT  
GAGGACTTATAGGACTTCACTACAATTTTCATTTCACTTCATCTAACAGATGTCATAGAG  
TAGTGAATTAGGCATCTGCTGT

>1237

CTCTCAGACACAGAGAAAGCTGAGGACTTATAGGACTTCACTACAATTTTCATTTCACT  
TCATCTAACAGATGTCATAGAGTAGTGAATTAGGCATCTGCTGTGGCAGAACCTTCTTT  
TACTCTCAGCATCCCTGGCTT

>1238

ACAGAGAAAGCTGAGGACTTATAGGACTTCACTACAATTTTCATTTCACTTCATCTAAC  
AGATGTCATAGAGTAGTGAATTAGGCATCTGCTGTGGCAGAACCTTCTTTTTACTCTCA  
GCATCCCTGGCTTGAAAGGCAG

>1239

AGGACTTATAGGACTTCACTACAATTTTCATTTCACTTCATCTAACAGATGTCATAGAGT  
AGTGAATTAGGCATCTGCTGTGGCAGAACCTTCTTTTTACTCTCAGCATCCCTGGCTTG  
AAAGGCAGATTTGTAGATTTC

>1240

CACTACAATTTTCATTTCACTTCATCTAACAGATGTCATAGAGTAGTGAATTAGGCATCT  
GCTGTGGCAGAACCTTCTTTTTACTCTCAGCATCCCTGGCTTGAAAGGCAGATTTGTAG  
ATTTCTAGGAAGCTACTTCAA

>1241

TTCATCTAACAGATGTCATAGAGTAGTGAATTAGGCATCTGCTGTGGCAGAACCTTCTT  
TTTACTCTCAGCATCCCTGGCTTGAAAGGCAGATTTGTAGATTTCCTAGGAAGCTACTTC  
AATTAAAATCTCTAAGATCCTC

>1242

AGTAGTGAATTAGGCATCTGCTGTGGCAGAACCTTCTTTTTACTCTCAGCATCCCTGGC  
TTGAAAGGCAGATTTGTAGATTTCCTAGGAAGCTACTTCAATTAAAATCTCTAAGATCCT  
CTTGCTAAGGGCTTGGCAACAG

>1243

ATTAGGCATCTGCTGTGGCAGAACCTTCTTTTTACTCTCAGCATCCCTGGCTTGAAAGG  
CAGATTTGTAGATTTCCTAGGAAGCTACTTCAATTAAAATCTCTAAGATCCTCTTGCTAAG  
GGCTTGGCAACAGGGAGGAGG

>1244

TCTGCTGTGGCAGAACCTTCTTTTTACTCTCAGCATCCCTGGCTTGAAAGGCAGATTTG  
TAGATTTCTAGGAAGCTACTTCAATTAATAATCTCTAAGATCCTCTTGCTAAGGGCTTGGC  
AACAGGGAGGAGGGGGCATGT

>1245

TCTCAGCATCCCTGGCTTGAAAGGCAGATTTGTAGATTTCTAGGAAGCTACTTCAATTA  
AAATCTCTAAGATCCTCTTGCTAAGGGCTTGGCAACAGGGAGGAGGGGGCATGTTGTA  
GTGGTTGAATTCTTACTTTTAGG

>1246

ATTTGTAGATTTCTAGGAAGCTACTTCAATTAATAATCTCTAAGATCCTCTTGCTAAGGGC  
TTGGCAACAGGGAGGAGGGGGCATGTTGTAGTGGTTGAATTCTTACTTTTAGGGACAC  
TGATGAATTTGTCTTTTGTCT

>1247

GTAGATTTCTAGGAAGCTACTTCAATTAATAATCTCTAAGATCCTCTTGCTAAGGGCTTG  
GCAACAGGGAGGAGGGGGCATGTTGTAGTGGTTGAATTCTTACTTTTAGGGACACTGA  
TGAATTTGTCTTTTGTCTCTCA

>1248

TACTTCAATTAATAATCTCTAAGATCCTCTTGCTAAGGGCTTGGCAACAGGGAGGAGGG  
GGCATGTTGTAGTGGTTGAATTCTTACTTTTAGGGACACTGATGAATTTGTCTTTTGTTC  
TCTCATCTCTTTTGCTTCTTCC

>1249

GATCCTCTTGCTAAGGGCTTGGCAACAGGGAGGAGGGGGCATGTTGTAGTGGTTGAAT  
TCTTACTTTTAGGGACACTGATGAATTTGTCTTTTGTCTCTCATCTCTTTTGCTTCTTCC  
CCTCTTCTTTCTCCTAGCCTC

>1250

TTAGGGACACTGATGAATTTGTCTTTTGTCTCTCATCTCTTTTGCTTCTTCCCCTCTTCT  
TTCTCCTAGCCTCCTCTATTGGCCCAGGAAGCCCACCCAGCCCCGCCACGCAGAGCCC  
AGAAGGAAAGAAAGCCTCATG

>1251

TTGTCTTTTGTCTCTCATCTCTTTTGCTTCTTCCCCTCTTCTTTCTCCTAGCCTCCTCTAT  
TGGCCCAGGAAGCCCACCCAGCCCCGCCACGCAGAGCCCAGAAGGAAAGAAAGCCT  
CATGCCTGAGCCGAGGGGAGCA

>1252

CTTTTGTCTCTCATCTCTTTTGCTTCTTCCCCTCTTCTTTCTCCTAGCCTCCTCTATTGG  
CCCAGGAAGCCCACCCAGCCCCGCCACGCAGAGCCCAGAAGGAAAGAAAGCCTCAT  
GCCTGAGCCGAGGGGAGCACCAT

>1253

GCTTCTTCCCCTCTTCTTTCTCCTAGCCTCCTCTATTGGCCCAGGAAGCCCACCCAGCC  
CCGCCACGCAGAGCCCAGAAGGAAAGAAAGCCTCATGCCTGAGCCGAGGGGAGCAC  
CATGGATCTGACAAAAATGGGCATG

>1254

CTATTGGCCCAGGAAGCCCACCCAGCCCCGCCACGCAGAGCCCAGAAGGAAAGAAAG  
CCTCATGCCTGAGCCGAGGGGAGCACCATGGATCTGACAAAAATGGGCATGATCCAGC  
TGCAGAACCCTAGCCACCCACGGG



>1255

GGCCCAGGAAGCCCACCCAGCCCCGCCACGCAGAGCCCAGAAGGAAAGAAAGCCTC  
ATGCCTGAGCCGAGGGGAGCACCATGGATCTGACAAAAATGGGCATGATCCAGCTGCA  
GAACCCTAGCCACCCCACGGGGCTAC

>1256

GAAGGAAAGAAAGCCTCATGCCTGAGCCGAGGGGAGCACCATGGATCTGACAAAAAT  
GGGCATGATCCAGCTGCAGAACCCTAGCCACCCCACGGGGCTACTGTGCAAGGCCAA  
CCAGATGCGGCTGGCCGGGACTTTGT

>1257

AAGAAAGCCTCATGCCTGAGCCGAGGGGAGCACCATGGATCTGACAAAAATGGGCAT  
GATCCAGCTGCAGAACCCTAGCCACCCCACGGGGCTACTGTGCAAGGCCAACCAGAT  
GCGGCTGGCCGGGACTTTGTGCGATG

>1258

CTCATGCCTGAGCCGAGGGGAGCACCATGGATCTGACAAAAATGGGCATGATCCAGCT  
GCAGAACCCTAGCCACCCCACGGGGCTACTGTGCAAGGCCAACCAGATGCGGCTGGC  
CGGGACTTTGTGCGATGTGGTCATC

>1259

CATGGATCTGACAAAAATGGGCATGATCCAGCTGCAGAACCCTAGCCACCCCACGGGG  
CTACTGTGCAAGGCCAACCAGATGCGGCTGGCCGGGACTTTGTGCGATGTGGTCATCA  
TGGTGGACAGCCAGGAGTTCCACG

>1260

GGCTACTGTGCAAGGCCAACCAGATGCGGCTGGCCGGGACTTTGTGCGATGTGGTCAT  
CATGGTGGACAGCCAGGAGTTCCACGCCCACGGACGGTGCTGGCCTGCACCAGCAA  
GATGTTTGAGATCCTCTTCCACCGC

>1261

ACTGTGCAAGGCCAACCAGATGCGGCTGGCCGGGACTTTGTGCGATGTGGTCATCATG  
GTGGACAGCCAGGAGTTCCACGCCCACGGACGGTGCTGGCCTGCACCAGCAAGATG  
TTTGAGATCCTCTTCCACCGCAATA

>1262

TGTGCGATGTGGTCATCATGGTGGACAGCCAGGAGTTCCACGCCCACGGACGGTGCT  
GGCCTGCACCAGCAAGATGTTTGAGATCCTCTTCCACCGCAATAGTCAACACTATACTT  
TGGACTTCCTCTCGCCAAAGACC

>1263

CGATGTGGTCATCATGGTGGACAGCCAGGAGTTCCACGCCCACGGACGGTGCTGGCC  
TGCACCAGCAAGATGTTTGAGATCCTCTTCCACCGCAATAGTCAACACTATACTTTGGA  
CTTCCTCTCGCCAAAGACCTTCC

>1264

AGTTCCACGCCCACGGACGGTGCTGGCCTGCACCAGCAAGATGTTTGAGATCCTCTT  
CCACCGCAATAGTCAACACTATACTTTGGACTTCCTCTCGCCAAAGACCTTCCAGCAGA  
TTCTGGAGTATGCATATACAGCC

>1265

CAGCAAGATGTTTGAGATCCTCTTCCACCGCAATAGTCAACACTATACTTTGGACTTCC  
TCTCGCCAAAGACCTTCCAGCAGATTCTGGAGTATGCATATACAGCCACGCTGCAAGCC  
AAGGCGGAGGACCTGGATGACC

>1266

GTTTGAGATCCTCTTCCACCGCAATAGTCAACACTATACTTTGGACTTCCTCTCGCCAA  
AGACCTTCCAGCAGATTCTGGAGTATGCATATACAGCCACGCTGCAAGCCAAGGCGGA  
GGACCTGGATGACCTGCTGTATG

>1267

AGTCAACACTATACTTTGGACTTCCTCTCGCCAAAGACCTTCCAGCAGATTCTGGAGTA  
TGCATATACAGCCACGCTGCAAGCCAAGGCGGAGGACCTGGATGACCTGCTGTATGCG  
GCCGAGATCCTGGAGATCGAGTA

>1268

ACTTTGGACTTCCTCTCGCCAAAGACCTTCCAGCAGATTCTGGAGTATGCATATACAGC  
CACGCTGCAAGCCAAGGCGGAGGACCTGGATGACCTGCTGTATGCGGCCGAGATCCTG  
GAGATCGAGTACCTGGAGGAACA

>1269

GGACTTCCTCTCGCCAAAGACCTTCCAGCAGATTCTGGAGTATGCATATACAGCCACGC  
TGCAAGCCAAGGCGGAGGACCTGGATGACCTGCTGTATGCGGCCGAGATCCTGGAGAT  
CGAGTACCTGGAGGAACAGTGCC

>1270

GGAGTATGCATATACAGCCACGCTGCAAGCCAAGGCGGAGGACCTGGATGACCTGCTG  
TATGCGGCCGAGATCCTGGAGATCGAGTACCTGGAGGAACAGTGCCTGAAGATGCTGG  
AGACCATCCAGGCCTCAGACGACA

>1271

AGCCACGCTGCAAGCCAAGGCGGAGGACCTGGATGACCTGCTGTATGCGGCCGAGAT  
CCTGGAGATCGAGTACCTGGAGGAACAGTGCCTGAAGATGCTGGAGACCATCCAGGC  
CTCAGACGACAATGACACGGAGGCCA

>1272

GCAAGCCAAGGCGGAGGACCTGGATGACCTGCTGTATGCGGCCGAGATCCTGGAGATC  
GAGTACCTGGAGGAACAGTGCCTGAAGATGCTGGAGACCATCCAGGCCTCAGACGAC  
AATGACACGGAGGCCACCATGGCCG

>1273

CAAGGCGGAGGACCTGGATGACCTGCTGTATGCGGCCGAGATCCTGGAGATCGAGTAC  
CTGGAGGAACAGTGCCTGAAGATGCTGGAGACCATCCAGGCCTCAGACGACAATGAC  
ACGGAGGCCACCATGGCCGATGGCG

>1274

TGACCTGCTGTATGCGGCCGAGATCCTGGAGATCGAGTACCTGGAGGAACAGTGCCTG  
AAGATGCTGGAGACCATCCAGGCCTCAGACGACAATGACACGGAGGCCACCATGGCC  
GATGGCGGGGCCGAGGAAGAAGAGG

>1275

CGAGTACCTGGAGGAACAGTGCCTGAAGATGCTGGAGACCATCCAGGCCTCAGACGA  
CAATGACACGGAGGCCACCATGGCCGATGGCGGGGCCGAGGAAGAAGAGGACCGCA  
AGGCTCGGTACCTCAAGAACATCTTCA

>1276

GATGCTGGAGACCATCCAGGCCTCAGACGACAATGACACGGAGGCCACCATGGCCGA  
TGGCGGGGCCGAGGAAGAAGAGGACCGCAAGGCTCGGTACCTCAAGAACATCTTCAT  
CTCGAAGCATTCCAGCGAGGAGAGTG

>1277

GACCATCCAGGCCTCAGACGACAATGACACGGAGGCCACCATGGCCGATGGCGGGGC  
CGAGGAAGAAGAGGACCGCAAGGCTCGGTACCTCAAGAACATCTTCATCTCGAAGCA  
TTCCAGCGAGGAGAGTGGGTATGCCA

>1278

TGACACGGAGGCCACCATGGCCGATGGCGGGGCCGAGGAAGAAGAGGACCGCAAGG  
CTCGGTACCTCAAGAACATCTTCATCTCGAAGCATTCCAGCGAGGAGAGTGGGTATGC  
CAGTGTGGCTGGACAGAGCCTCCCTG

>1279

GGCCGATGGCGGGGCCGAGGAAGAAGAGGACCGCAAGGCTCGGTACCTCAAGAACAT  
CTTCATCTCGAAGCATTCCAGCGAGGAGAGTGGGTATGCCAGTGTGGCTGGACAGAGC  
CTCCCTGGGCCCATGGTGGACCAGA

>1280

GGCCGAGGAAGAAGAGGACCGCAAGGCTCGGTACCTCAAGAACATCTTCATCTCGAA  
GCATTCCAGCGAGGAGAGTGGGTATGCCAGTGTGGCTGGACAGAGCCTCCCTGGGCC  
CATGGTGGACCAGAGCCCTTCAGTCT

>1281

GTACCTCAAGAACATCTTCATCTCGAAGCATTCCAGCGAGGAGAGTGGGTATGCCAGT  
GTGGCTGGACAGAGCCTCCCTGGGCCCATGGTGGACCAGAGCCCTTCAGTCTCCACTT  
CATTTGGTCTTTTCAGCCATGAGTC

>1282

ACCTCAAGAACATCTTCATCTCGAAGCATTCCAGCGAGGAGAGTGGGTATGCCAGTGT  
GGCTGGACAGAGCCTCCCTGGGCCCATGGTGGACCAGAGCCCTTCAGTCTCCACTTCA  
TTTGGTCTTTTCAGCCATGAGTCCC

>1283

GCATTCCAGCGAGGAGAGTGGGTATGCCAGTGTGGCTGGACAGAGCCTCCCTGGGCC  
CATGGTGGACCAGAGCCCTTCAGTCTCCACTTCATTTGGTCTTTTCAGCCATGAGTCCCA  
CCAAGGCTGCAGTGGACAGTTTGA

>1284

GCTGGACAGAGCCTCCCTGGGCCCATGGTGGACCAGAGCCCTTCAGTCTCCACTTCAT  
TTGGTCTTTTCAGCCATGAGTCCCACCAAGGCTGCAGTGGACAGTTTGATGACCATAGG  
ACAGTCTCTCCTGCAGGGAACCTCT

>1285

AGAGCCTCCCTGGGCCCATGGTGGACCAGAGCCCTTCAGTCTCCACTTCATTTGGTCTT  
TCAGCCATGAGTCCCACCAAGGCTGCAGTGGACAGTTTGATGACCATAGGACAGTCTC  
TCCTGCAGGGAACCTTCAGCCA

>1286

TGGGCCCATGGTGGACCAGAGCCCTTCAGTCTCCACTTCATTTGGTCTTTTCAGCCATGA  
GTCCCACCAAGGCTGCAGTGGACAGTTTGATGACCATAGGACAGTCTCTCCTGCAGGG  
AACTCTTCAGCCACCTGCAGGGC

>1287

GTCTCCACTTCATTTGGTCTTTTCAGCCATGAGTCCCACCAAGGCTGCAGTGGACAGTTT  
GATGACCATAGGACAGTCTCTCCTGCAGGGAACCTTCAGCCACCTGCAGGGCCCCGAG  
GAGCCAACCTCTGGCTGGGGGTGG

>1288

TCTTTCAGCCATGAGTCCCACCAAGGCTGCAGTGGACAGTTTGATGACCATAGGACAG  
TCTCTCCTGCAGGGAACCTCTTCAGCCACCTGCAGGGCCCCGAGGAGCCAACTCTGGCTG  
GGGGTGGGCGGCACCCTGGGGTGG

>1289

GAGTCCCACCAAGGCTGCAGTGGACAGTTTGATGACCATAGGACAGTCTCTCCTGCAG  
GGAACCTCTTCAGCCACCTGCAGGGCCCCGAGGAGCCAACTCTGGCTGGGGGTGGGCGG  
CACCTTGGGGTGGCTGAGGTGAAGA

>1290

AGTGGACAGTTTGATGACCATAGGACAGTCTCTCCTGCAGGGAACCTCTTCAGCCACCT  
GCAGGGCCCCGAGGAGCCAACTCTGGCTGGGGGTGGGCGGCACCCTGGGGTGGCTGA  
GGTGAAGACGGAGATGATGCAGGTGG

>1291

TCTTCAGCCACCTGCAGGGCCCCGAGGAGCCAACTCTGGCTGGGGGTGGGCGGCACCC  
TGGGGTGGCTGAGGTGAAGACGGAGATGATGCAGGTGGATGAGGTGCCCAGCCAGGA  
CAGCCCTGGGGCAGCCGAGTCCAGCA

>1292

GCCACCTGCAGGGCCCCGAGGAGCCAACTCTGGCTGGGGGTGGGCGGCACCCTGGGGT  
GGCTGAGGTGAAGACGGAGATGATGCAGGTGGATGAGGTGCCCAGCCAGGACAGCCC  
TGGGGCAGCCGAGTCCAGCATCTCAG

>1293

CTGGGGGTGGGCGGCACCCTGGGGTGGCTGAGGTGAAGACGGAGATGATGCAGGTGG  
ATGAGGTGCCCAGCCAGGACAGCCCTGGGGCAGCCGAGTCCAGCATCTCAGGAGGGA  
TGGGGGACAAGGTTGAGGAAAGAGGC

>1294

GGGTGGGCGGCACCCTGGGGTGGCTGAGGTGAAGACGGAGATGATGCAGGTGGATGA  
GGTGCCCAGCCAGGACAGCCCTGGGGCAGCCGAGTCCAGCATCTCAGGAGGGATGGG  
GGACAAGGTTGAGGAAAGAGGCCAAAG

>1295

GGCGGCACCCTGGGGTGGCTGAGGTGAAGACGGAGATGATGCAGGTGGATGAGGTGC  
CCAGCCAGGACAGCCCTGGGGCAGCCGAGTCCAGCATCTCAGGAGGGATGGGGGACA  
AGGTTGAGGAAAGAGGCCAAAGAGGGG

>1296

GGCTGAGGTGAAGACGGAGATGATGCAGGTGGATGAGGTGCCCAGCCAGGACAGCCC  
TGGGGCAGCCGAGTCCAGCATCTCAGGAGGGATGGGGGACAAGGTTGAGGAAAGAG  
GCAAAGAGGGGCCTGGGACCCCGACTC

>1297

GGATGAGGTGCCCAGCCAGGACAGCCCTGGGGCAGCCGAGTCCAGCATCTCAGGAGG  
GATGGGGGACAAGGTTGAGGAAAGAGGCCAAAGAGGGGCCTGGGACCCCGACTCGAA  
GCAGCGTCATCACCAGTGCTAGGGAGC

>1298

GGTGCCCAGCCAGGACAGCCCTGGGGCAGCCGAGTCCAGCATCTCAGGAGGGATGGG  
GGACAAGGTTGAGGAAAGAGGCCAAAGAGGGGCCTGGGACCCCGACTCGAAGCAGCG  
TCATCACCAGTGCTAGGGAGCTACACT

>1299

CCAGCCAGGACAGCCCTGGGGCAGCCGAGTCCAGCATCTCAGGAGGGATGGGGGACA  
AGGTTGAGGAAAGAGGGCAAAGAGGGGCCTGGGACCCCGACTCGAAGCAGCGTCATC  
ACCA GTGCTAGGGAGCTACACTATGGG

>1300

GACAGCCCTGGGGCAGCCGAGTCCAGCATCTCAGGAGGGATGGGGGACAAGGTTGAG  
GAAAGAGGCAAAGAGGGGCCTGGGACCCCGACTCGAAGCAGCGTCATCACCAGTGCT  
AGGGAGCTACACTATGGGCGAGAGGA

>1301

GCATCTCAGGAGGGATGGGGGACAAGGTTGAGGAAAGAGGCAAAGAGGGGCCTGGG  
ACCCCGACTCGAAGCAGCGTCATCACCAGTGCTAGGGAGCTACACTATGGGCGAGAG  
GAGAGTGCCGAGCAGGTGCCACCCCCA

>1302

ACAAGGTTGAGGAAAGAGGCAAAGAGGGGCCTGGGACCCCGACTCGAAGCAGCGTC  
ATCACCAGTGCTAGGGAGCTACACTATGGGCGAGAGGAGAGTGCCGAGCAGGTGCCA  
CCCCAGCTGAGGCTGGCCAGGCCCCC

>1303

GGTTGAGGAAAGAGGCAAAGAGGGGCCTGGGACCCCGACTCGAAGCAGCGTCATCA  
CCAGTGCTAGGGAGCTACACTATGGGCGAGAGGAGAGTGCCGAGCAGGTGCCACCCC  
CAGCTGAGGCTGGCCAGGCCCCCACTG

>1304

AAAGAGGGGCCTGGGACCCCGACTCGAAGCAGCGTCATCACCAGTGCTAGGGAGCTA  
CACTATGGGCGAGAGGAGAGTGCCGAGCAGGTGCCACCCCCAGCTGAGGCTGGCCAG  
GCCCCCACTGGCCGACCTGAGCACCC

>1305

GACCCCGACTCGAAGCAGCGTCATCACCAGTGCTAGGGAGCTACACTATGGGCGAGA  
GGAGAGTGCCGAGCAGGTGCCACCCCCAGCTGAGGCTGGCCAGGCCCCCACTGGCCG  
ACCTGAGCACCCAGCACCCCCGCCTG

>1306

TGCTAGGGAGCTACACTATGGGCGAGAGGAGAGTGCCGAGCAGGTGCCACCCCCAGC  
TGAGGCTGGCCAGGCCCCCACTGGCCGACCTGAGCACCCAGCACCCCCGCCTGAGAA  
GCATCTGGGCATCTACTCCGTGTTGC

>1307

GCGAGAGGAGAGTGCCGAGCAGGTGCCACCCCCAGCTGAGGCTGGCCAGGCCCCCA  
CTGGCCGACCTGAGCACCCAGCACCCCCGCCTGAGAAGCATCTGGGCATCTACTCCGT  
GTTGCCCAACCACAAGGCTGACGCTG

>1308

GGTGCCACCCCCAGCTGAGGCTGGCCAGGCCCCCACTGGCCGACCTGAGCACCCAGC  
ACCCCCGCCTGAGAAGCATCTGGGCATCTACTCCGTGTTGCCCAACCACAAGGCTGAC  
GCTGTATTGAGCATGCCGTCTTCCG

>1309

CCGACCTGAGCACCCAGCACCCCCGCCTGAGAAGCATCTGGGCATCTACTCCGTGTTG  
CCCAACCACAAGGCTGACGCTGTATTGAGCATGCCGTCTTCCGTGACCTCTGGCCTCC  
ACGTGCAGCCTGCCCTGGCTGTCT

>1310  
CACCCCCGCCTGAGAAGCATCTGGGCATCTACTCCGTGTTGCCCAACCACAAGGCTGA  
CGCTGTATTGAGCATGCCGTCTTCCGTGACCTCTGGCCTCCACGTGCAGCCTGCCCTGG  
CTGTCTCCATGGACTTCAGCACC

>1311  
GTTGCCCAACCACAAGGCTGACGCTGTATTGAGCATGCCGTCTTCCGTGACCTCTGGC  
CTCCACGTGCAGCCTGCCCTGGCTGTCTCCATGGACTTCAGCACCTATGGGGGGCTGC  
TGCCCCAGGGCTTCATCCAGAGGG

>1312  
TGAGCATGCCGTCTTCCGTGACCTCTGGCCTCCACGTGCAGCCTGCCCTGGCTGTCTCC  
ATGGACTTCAGCACCTATGGGGGGCTGTGCCCCAGGGCTTCATCCAGAGGGAGCTGT  
TCAGCAAGCTGGGGGAGCTGGCT

>1313  
TGGCCTCCACGTGCAGCCTGCCCTGGCTGTCTCCATGGACTTCAGCACCTATGGGGGG  
CTGCTGCCCCAGGGCTTCATCCAGAGGGAGCTGTTTCAGCAAGCTGGGGGAGCTGGCT  
GTGGGCATGAAGTCAGAGAGCCGGA

>1314  
GCAGCCTGCCCTGGCTGTCTCCATGGACTTCAGCACCTATGGGGGGCTGTGCCCCAG  
GGCTTCATCCAGAGGGAGCTGTTTCAGCAAGCTGGGGGAGCTGGCTGTGGGCATGAAG  
TCAGAGAGCCGGACCATCGGAGAGC

>1315  
CTCCATGGACTTCAGCACCTATGGGGGGCTGTGCCCCAGGGCTTCATCCAGAGGGAG  
CTGTTTCAGCAAGCTGGGGGAGCTGGCTGTGGGCATGAAGTCAGAGAGCCGGACCATC  
GGAGAGCAGTGCAGCGTGTGTGGGG

>1316  
GCTGTGCCCCAGGGCTTCATCCAGAGGGAGCTGTTTCAGCAAGCTGGGGGAGCTGGC  
TGTGGGCATGAAGTCAGAGAGCCGGACCATCGGAGAGCAGTGCAGCGTGTGTGGGGT  
CGAGCTTCCTGATAACGAGGCTGTGG

>1317  
CTGCCCCAGGGCTTCATCCAGAGGGAGCTGTTTCAGCAAGCTGGGGGAGCTGGCTGTG  
GGCATGAAGTCAGAGAGCCGGACCATCGGAGAGCAGTGCAGCGTGTGTGGGGTCGAG  
CTTCCTGATAACGAGGCTGTGGAGCA

>1318  
CAGAGGGAGCTGTTTCAGCAAGCTGGGGGAGCTGGCTGTGGGCATGAAGTCAGAGAGC  
CGGACCATCGGAGAGCAGTGCAGCGTGTGTGGGGTCGAGCTTCCTGATAACGAGGCT  
GTGGAGCAGCACAGGTAGGCCCCGCT

>1319  
GGAGCTGGCTGTGGGCATGAAGTCAGAGAGCCGGACCATCGGAGAGCAGTGCAGCGT  
GTGTGGGGTCGAGCTTCCTGATAACGAGGCTGTGGAGCAGCACAGGTAGGCCCCGCT  
CCAGCCCCGCACCTGATGTAGGACTT

>1320  
CATGAAGTCAGAGAGCCGGACCATCGGAGAGCAGTGCAGCGTGTGTGGGGTCGAGCT  
TCCTGATAACGAGGCTGTGGAGCAGCACAGGTAGGCCCCGCTCCAGCCCCGCACCTGA  
TGTAGGACTTGAGGCCCTCACACCC

>1321

AGAGAGCCGGACCATCGGAGAGCAGTGCAGCGTGTGTGGGGTCGAGCTTCCTGATAA  
CGAGGCTGTGGAGCAGCACAGGTAGGCCCCGCTCCAGCCCCGCACCTGATGTAGGAC  
TTGAGGCCCTCACACCCCTCCTTCAC

>1322

GTGCAGCGTGTGTGGGGTCGAGCTTCCTGATAACGAGGCTGTGGAGCAGCACAGGTA  
GGCCCCGCTCCAGCCCCGCACCTGATGTAGGACTTGAGGCCCTCACACCCCTCCTTCA  
CACCTGGCTGCTCCCAAGTTAGGG

>1323

TCGAGCTTCCTGATAACGAGGCTGTGGAGCAGCACAGGTAGGCCCCGCTCCAGCCCCG  
CACCTGATGTAGGACTTGAGGCCCTCACACCCCTCCTTCACACCCTGGCTGCTCCCAA  
GTTAGGGGCCTGGCTCCCCTGTCT

>1324

CCTGATAACGAGGCTGTGGAGCAGCACAGGTAGGCCCCGCTCCAGCCCCGCACCTGAT  
GTAGGACTTGAGGCCCTCACACCCCTCCTTCACACCCTGGCTGCTCCCAAGTTAGGGG  
CCTGGCTCCCCTGTCTTGGCAATT

>1325

CTCCAGCCCCGCACCTGATGTAGGACTTGAGGCCCTCACACCCCTCCTTCACACCCTG  
GCTGCTCCCAAGTTAGGGGCCTGGCTCCCCTGTCTTGGCAATTTGTGAAAAAACCAGA  
ACACTTCTTCTAAAGTTCTGGCGG

>1326

CCTTCACACCCTGGCTGCTCCCAAGTTAGGGGCCTGGCTCCCCTGTCTTGGCAATTTGT  
GAAAAAACCAGAACACTTCTTCTAAAGTTCTGGCGGGGAGGGGAGCAGGTTTTTTAA  
AGTGTAGTGAGGGGGCCTAGGATC

>1327

GCTCCCAAGTTAGGGGCCTGGCTCCCCTGTCTTGGCAATTTGTGAAAAAACCAGAAC  
CTTCTTCTAAAGTTCTGGCGGGGAGGGGAGCAGGTTTTTTAAAGTGTAGTGAGGGGGC  
CTAGGATCTTTCCAAAAAGCACCA

>1328

GGGCCTGGCTCCCCTGTCTTGGCAATTTGTGAAAAAACCAGAACACTTCTTCTAAAGT  
TCTGGCGGGGAGGGGAGCAGGTTTTTTAAAGTGTAGTGAGGGGGCCTAGGATCTTTCC  
AAAAAGCACCAAGGGGACACTCATG

>1329

TGGCTCCCCTGTCTTGGCAATTTGTGAAAAAACCAGAACACTTCTTCTAAAGTTCTGG  
CGGGGAGGGGAGCAGGTTTTTTAAAGTGTAGTGAGGGGGCCTAGGATCTTTCCAAAA  
AGCACCAAGGGGACACTCATGGGCGC

>1330

TGGCAATTTGTGAAAAAACCAGAACACTTCTTCTAAAGTTCTGGCGGGGAGGGGAGC  
AGGTTTTTTAAAGTGTAGTGAGGGGGCCTAGGATCTTTCCAAAAAGCACCAAGGGGACA  
CTCATGGGCGCAGCTTCTTAATAGG

>1331

TCTGGCGGGGAGGGGAGCAGGTTTTTTAAAGTGTAGTGAGGGGGCCTAGGATCTTTCC  
AAAAAGCACCAAGGGGACACTCATGGGCGCAGCTTCTTAATAGGCCCTTCCCTTTGTTT  
TTTGCTTTTGGGCCCCTGTTTGTT

>1332

GGTTTTTTTAAAGTGTAGTGAGGGGGCCTAGGATCTTTCCAAAAAGCACCAGGGGACAC  
TCATGGGCGCAGCTTCTTAATAGGCCCTTCCCTTTGTTTTTTGCTTTTGGGCCCTGTTT  
GTTTTTCTGCTGTTTGGTCTG

>1333

GTGTAGTGAGGGGGCCTAGGATCTTTCCAAAAAGCACCAGGGGACACTCATGGGCGC  
AGCTTCTTAATAGGCCCTTCCCTTTGTTTTTTGCTTTTGGGCCCTGTTTGTTTTTCTGC  
TGTTTGGTCTGTTCTCCTTTGC

>1334

CCCTTTGTTTTTTGCTTTTGGGCCCTGTTTGTTTTTCTGCTGTTTGGTCTGTTCTCCTT  
TGCTTGGAGTGACTGATAAAATGGAGAGAAGGAGAAAAGGAGTGGGATGAGGGTCTC  
TTGGGCCCTGCATCTGACCATG

>1335

TTGGGCCCTGTTTGTTTTTCTGCTGTTTGGTCTGTTCTCCTTTGCTTGGAGTGACTGA  
TAAATGGAGAGAAGGAGAAAAGGAGTGGGATGAGGGTCTCTTGGGCCCTGCATCTG  
ACCATGTTACTAGGTTTCAGGTC

>1336

GGGCCCTGTTTGTTTTTCTGCTGTTTGGTCTGTTCTCCTTTGCTTGGAGTGACTGATA  
AAATGGAGAGAAGGAGAAAAGGAGTGGGATGAGGGTCTCTTGGGCCCTGCATCTGAC  
CATGTTACTAGGTTTCAGGTCCT

>1337

TGTTTTTCTGCTGTTTGGTCTGTTCTCCTTTGCTTGGAGTGACTGATAAAATGGAGAG  
AAGGAGAAAAGGAGTGGGATGAGGGTCTCTTGGGCCCTGCATCTGACCATGTTACTAG  
GTTTCAGGTCCTCGGGTCCCAT

>1338

TAAATGGAGAGAAGGAGAAAAGGAGTGGGATGAGGGTCTCTTGGGCCCTGCATCTG  
ACCATGTTACTAGGTTTCAGGTCCTCGGGTCCCATGCAGTGGTCCCTGTGAAGACAG  
CCTGTCCCTTTCTGCAGCTTGGGAG

>1339

GAGAGAAGGAGAAAAGGAGTGGGATGAGGGTCTCTTGGGCCCTGCATCTGACCATGT  
TACTAGGTTTCAGGTCCTCGGGTCCCATGCAGTGGTCCCTGTGAAGACAGCCTGTCC  
CTTCTGCAGCTTGGGAGAATGGGA

>1340

GGGATGAGGGTCTCTTGGGCCCTGCATCTGACCATGTTACTAGGTTTCAGGTCCTCGGG  
TTCCCATGCAGTGGTCCCTGTGAAGACAGCCTGTCCCTTTCTGCAGCTTGGGAGAATG  
GGAGGGTCTGGGGGCTGCTTAAG

>1341

GTTACTAGGTTTCAGGTCCTCGGGTCCCATGCAGTGGTCCCTGTGAAGACAGCCTGT  
CCCTTTCTGCAGCTTGGGAGAATGGGAGGGTCTGGGGGCTGCTTAAGCCACAAGAGC  
AGCTGCAGGTTCTGAACCTTATTCC

>1342

GTTTCAGGTCCTCGGGTCCCATGCAGTGGTCCCTGTGAAGACAGCCTGTCCCTTTCTG  
CAGCTTGGGAGAATGGGAGGGTCTGGGGGCTGCTTAAGCCACAAGAGCAGCTGCAGG  
TTCTGAACCTTATTCTGCTGCTTAAG



>1343

TGGTCCCTGTGAAGACAGCCTGTCCCTTTCTGCAGCTTGGGAGAATGGGAGGGTCTGG  
GGGCTGCTTAAGCCACAAGAGCAGCTGCAGGTTCTGAACCTTATTCCTGGTGAAAGTT  
AATCTCCTTGCTCTGTCTCCCTTC

>1344

CCTGTCCCTTTCTGCAGCTTGGGAGAATGGGAGGGTCTGGGGGCTGCTTAAGCCACAA  
GAGCAGCTGCAGGTTCTGAACCTTATTCCTGGTGAAAGTTAATCTCCTTGCTCTGTCTC  
CCTTCTCATTCTCTGATCCTGCA

>1345

ATGGGAGGGTCTGGGGGCTGCTTAAGCCACAAGAGCAGCTGCAGGTTCTGAACCTTAT  
TCCTGGTGAAAGTTAATCTCCTTGCTCTGTCTCCCTTCTCATTCTCTGATCCTGCACATG  
CATTTAGGGGGAATTGATTAA

>1346

TATTCCTGGTGAAAGTTAATCTCCTTGCTCTGTCTCCCTTCTCATTCTCTGATCCTGCAC  
ATGCATTTAGGGGGAATTGATTAAATGCAAGGGGAAAGGATGGGTATAAGAGTCTTG  
GTCTTGCAAGCCTGTGAAGTCTC

>1347

CCTTGCTCTGTCTCCCTTCTCATTCTCTGATCCTGCACATGCATTTAGGGGGAATTGATT  
TAAATGCAAGGGGAAAGGATGGGTATAAGAGTCTTGGTCTTGCAAGCCTGTGAAGTCTC  
ATTCTTATCCCATCTCTGCTCA

>1348

TCATTCTCTGATCCTGCACATGCATTTAGGGGGAATTGATTAAATGCAAGGGGAAAGG  
ATGGGTATAAGAGTCTTGGTCTTGCAAGCCTGTGAAGTCTCATTCTTATCCCATCTCTGCT  
CACACTGAACTAAATGCCGCT

>1349

ATTCTCTGATCCTGCACATGCATTTAGGGGGAATTGATTAAATGCAAGGGGAAAGGAT  
GGGTATAAGAGTCTTGGTCTTGCAAGCCTGTGAAGTCTCATTCTTATCCCATCTCTGCTCA  
CACTGAACTAAATGCCGCTTC

>1350

CACATGCATTTAGGGGGAATTGATTAAATGCAAGGGGAAAGGATGGGTATAAGAGTC  
TTGGTCTTGCAAGCCTGTGAAGTCTCATTCTTATCCCATCTCTGCTCACACTGAACTAAAT  
GCCGCTTCAGGCTAGCATTGGC

>1351

TTGGTCTTGCAAGCCTGTGAAGTCTCATTCTTATCCCATCTCTGCTCACACTGAACTAAAT  
GCCGCTTCAGGCTAGCATTGGCTTCCCTCCGGCTTCCGTTTCCTTCTCTATGAAATAACC  
ATTCATTGAGCTCTTATGAC

>1352

CTTGCAAGCCTGTGAAGTCTCATTCTTATCCCATCTCTGCTCACACTGAACTAAATGCCG  
CTTCAGGCTAGCATTGGCTTCCCTCCGGCTTCCGTTTCCTTCTCTATGAAATAACCATTC  
ATTGAGCTCTTATGACATGTT

>1353

GCCGCTTCAGGCTAGCATTGGCTTCCCTCCGGCTTCCGTTTCCTTCTCTATGAAATAACC  
ATTCATTGAGCTCTTATGACATGTTTGGTTTCACTAAGCACTTTCCATGAGTTGCATT  
TTCATTACAACAGCCCTTTG

>1354

TCCCTCCGGCTTCCGTTTCTTCTCTATGAAATAACCATTCATTGAGCTCTTATGACATG  
TTTGGTTCAGTACTAAGCACTTTCCATGAGTTGCATTTTCATTACAACAGCCCTTTGAGA  
TAGGTAATGTCCTTCTTTTT

>1355

TTCTCTATGAAATAACCATTCATTGAGCTCTTATGACATGTTTGGTTCAGTACTAAGCAC  
TTTCCATGAGTTGCATTTTCATTACAACAGCCCTTTGAGATAGGTAATGTCCTTCTTTTT  
TTTTTGGATGTGAAGTTTCG

>1356

CATTGAGCTCTTATGACATGTTTGGTTCAGTACTAAGCACTTTCCATGAGTTGCATTTTC  
ATTACAACAGCCCTTTGAGATAGGTAATGTCCTTCTTTTTTTTTTTGGATGTGAAGTTTCG  
CTCTCCTTGCCCAGGCTGGA

>1357

CTTATGACATGTTTGGTTCAGTACTAAGCACTTTCCATGAGTTGCATTTTCATTACAACA  
GCCCTTTGAGATAGGTAATGTCCTTCTTTTTTTTTTTGGATGTGAAGTTTCGCTCTCCTTG  
CCCAGGCTGGAGTGCAATGG

>1358

ATGAGTTGCATTTTCATTACAACAGCCCTTTGAGATAGGTAATGTCCTTCTTTTTTTTTTT  
GGATGTGAAGTTTCGCTCTCCTTGCCCAGGCTGGAGTGCAATGGTGTGATCTCTGCTCA  
CCGCAACCTCTGCATCCCGGG

>1359

CAACAGCCCTTTGAGATAGGTAATGTCCTTCTTTTTTTTTTTGGATGTGAAGTTTCGCTCT  
CCTTGCCCAGGCTGGAGTGCAATGGTGTGATCTCTGCTCACCGCAACCTCTGCATCCC  
GGGTTAAGGTGATTCTCCTGCC

>1360

CTCTCCTTGCCCAGGCTGGAGTGCAATGGTGTGATCTCTGCTCACCGCAACCTCTGCAT  
CCCGGGTTAAGGTGATTCTCCTGCCTCAGCCTCCCGAGTAGCTCGGATTACAGGCACG  
CACCACCATACCTGGCTAATTTT

>1361

GAGTGCAATGGTGTGATCTCTGCTCACCGCAACCTCTGCATCCCGGGTTAAGGTGATTCT  
TCCTGCCTCAGCCTCCCGAGTAGCTCGGATTACAGGCACGCACCACCATACCTGGCTAA  
TTTTGAATTTTATAGTAGAGACG

>1362

CACCGCAACCTCTGCATCCCGGGTTAAGGTGATTCTCCTGCCTCAGCCTCCCGAGTAGC  
TCGGATTACAGGCACGCACCACCATACCTGGCTAATTTGAATTTTATAGTAGAGACGGG  
CTTTCACCGTGTTGGTCAGGAT

>1363

TGCCTCAGCCTCCCGAGTAGCTCGGATTACAGGCACGCACCACCATACCTGGCTAATTT  
TGAATTTTATAGTAGAGACGGGCTTTCACCGTGTTGGTCAGGATGGTCTCGAACTCCCG  
ACCTCAGGTGATCGGCCTGCTTC

>1364

CAGGCACGCACCACCATACCTGGCTAATTTTGAATTTTATAGTAGAGACGGGCTTTCACC  
GTGTTGGTCAGGATGGTCTCGAACTCCCGACCTCAGGTGATCGGCCTGCTTCGGCCTC  
CCAAAGTGCTGGATTACAGGTAT

>1365

AATTTTGAATTTTATAGTAGAGACGGGCTTTCACCGTGTTGGTCAGGATGGTCTCGAACT  
CCCGACCTCAGGTGATCGGCCTGCTTCGGCCTCCCAAAGTGCTGGATTACAGGTATGA  
GCCACCGTGTCAGCTGGTAATG

>1366

TTCACCGTGTTGGTCAGGATGGTCTCGAACTCCCGACCTCAGGTGATCGGCCTGCTTC  
GGCCTCCCAAAGTGCTGGATTACAGGTATGAGCCACCGTGTCAGCTGGTAATGTCCTT  
CTTTTACATGGAACAATACTAAG

>1367

TCAGGATGGTCTCGAACTCCCGACCTCAGGTGATCGGCCTGCTTCGGCCTCCCAAAGT  
GCTGGATTACAGGTATGAGCCACCGTGTCAGCTGGTAATGTCCTTCTTTTACATGGAA  
CAATACTAAGGCTCAGATGTCAA

>1368

GGTCTCGAACTCCCGACCTCAGGTGATCGGCCTGCTTCGGCCTCCCAAAGTGCTGGAT  
TACAGGTATGAGCCACCGTGTCAGCTGGTAATGTCCTTCTTTTACATGGAACAATACT  
AAGGCTCAGATGTCAAGTCTCTT

>1369

TGCTGGATTACAGGTATGAGCCACCGTGTCAGCTGGTAATGTCCTTCTTTTACATGGA  
ACAATACTAAGGCTCAGATGTCAAGTCTCTTTTCTAGGGTCACATAGATAGTAAGAGGC  
AGAGCTGGATTCAAATTTAGGT

>1370

ATTACAGGTATGAGCCACCGTGTCAGCTGGTAATGTCCTTCTTTTACATGGAACAATA  
CTAAGGCTCAGATGTCAAGTCTCTTTTCTAGGGTCACATAGATAGTAAGAGGCAGAGCT  
GGATTCAAATTTAGGTCCTTAC

>1371

TGTCCAGCTGGTAATGTCCTTCTTTTACATGGAACAATACTAAGGCTCAGATGTCAAGT  
CTCTTTTCTAGGGTCACATAGATAGTAAGAGGCAGAGCTGGATTCAAATTTAGGTCCTT  
ACCCCCTGGTACTTTGCTGCCT

>1372

TCTTTTACATGGAACAATACTAAGGCTCAGATGTCAAGTCTCTTTTCTAGGGTCACATA  
GATAGTAAGAGGCAGAGCTGGATTCAAATTTAGGTCCTTACCCCCTGGTACTTTGCTGC  
CTCTTGGAGTCACTTAGACTTG

>1373

TTACATGGAACAATACTAAGGCTCAGATGTCAAGTCTCTTTTCTAGGGTCACATAGATA  
GTAAGAGGCAGAGCTGGATTCAAATTTAGGTCCTTACCCCCTGGTACTTTGCTGCCTCT  
TGGAGTCACTTAGACTTGAAGA

>1374

ACATGGAACAATACTAAGGCTCAGATGTCAAGTCTCTTTTCTAGGGTCACATAGATAGT  
AAGAGGCAGAGCTGGATTCAAATTTAGGTCCTTACCCCCTGGTACTTTGCTGCCTCTTG  
GAGTCACTTAGACTTGAAGAGG

>1375

AGGCTCAGATGTCAAGTCTCTTTTCTAGGGTCACATAGATAGTAAGAGGCAGAGCTGG  
ATTCAAATTTAGGTCCTTACCCCCTGGTACTTTGCTGCCTCTTGGAGTCACTTAGACTTG  
AAGAGGATCATGTCTATGGAAC

>1376

TAGATAGTAAGAGGCAGAGCTGGATTCAAATTTAGGTCCTTACCCCCTGGTACTTTGCT  
GCCTCTTGGAGTCACTTAGACTTGAAGAGGATCATGTCTATGGAACAGAGCGTTTTGA  
AGATTGCTTATAGGAAGTGGAGT

>1377

AAGAGGCAGAGCTGGATTCAAATTTAGGTCCTTACCCCCTGGTACTTTGCTGCCTCTTG  
GAGTCACTTAGACTTGAAGAGGATCATGTCTATGGAACAGAGCGTTTTGAAGATTGCTT  
ATAGGAAGTGGAGTAAATAACA

>1378

GAGCTGGATTCAAATTTAGGTCCTTACCCCCTGGTACTTTGCTGCCTCTTGGAGTCACT  
TAGACTTGAAGAGGATCATGTCTATGGAACAGAGCGTTTTGAAGATTGCTTATAGGAAG  
TGGAGTAAATAACAGGGGGGAT

>1379

CCTTACCCCCTGGTACTTTGCTGCCTCTTGGAGTCACTTAGACTTGAAGAGGATCATGT  
CTATGGAACAGAGCGTTTTGAAGATTGCTTATAGGAAGTGGAGTAAATAACAGGGGGG  
ATAAGTAGCGAGTTTGTTTTTTT

>1380

CCTCTTGGAGTCACTTAGACTTGAAGAGGATCATGTCTATGGAACAGAGCGTTTTGAA  
GATTGCTTATAGGAAGTGGAGTAAATAACAGGGGGGATAAGTAGCGAGTTTGTTTTTTT  
TTTCCTTGCTTCTGTCATAAACC

>1381

TTGGAGTCACTTAGACTTGAAGAGGATCATGTCTATGGAACAGAGCGTTTTGAAGATT  
GCTTATAGGAAGTGGAGTAAATAACAGGGGGGATAAGTAGCGAGTTTGTTTTTTTTTTC  
CTTGCTTCTGTCATAAACCACGT

>1382

GTCACTTAGACTTGAAGAGGATCATGTCTATGGAACAGAGCGTTTTGAAGATTGCTTAT  
AGGAAGTGGAGTAAATAACAGGGGGGATAAGTAGCGAGTTTGTTTTTTTTTTCCTTGCT  
TCTGTCATAAACCACGTGCCCA

>1383

CTTGAAGAGGATCATGTCTATGGAACAGAGCGTTTTGAAGATTGCTTATAGGAAGTGG  
AGTAAATAACAGGGGGGATAAGTAGCGAGTTTGTTTTTTTTTTCCTTGCTTCTGTCATAA  
ACCACGTGCCCATCATTTTATC

>1384

ATCATGTCTATGGAACAGAGCGTTTTGAAGATTGCTTATAGGAAGTGGAGTAAATAACA  
GGGGGGATAAGTAGCGAGTTTGTTTTTTTTTTCCTTGCTTCTGTCATAAACCACGTGCC  
CATCATTTTATCCTCTAGTTTC

>1385

TAAGTAGCGAGTTTGTTTTTTTTTTCCTTGCTTCTGTCATAAACCACGTGCCCATCATTT  
TATCCTCTAGTTTCTGGGTCAGATGAATGGAGTCAAGAAATCCAGCTTCTGTTGTCAT  
TGACGACAGCATTTGGCTGCA

>1386

TTGTTTTTTTTTTCCTTGCTTCTGTCATAAACCACGTGCCCATCATTTTATCCTCTAGTTT  
CTGGGTCAGATGAATGGAGTCAAGAAATCCAGCTTCTGTTGTCATTGACGACAGCAT  
TTGGCTGCATACCCTGTGGTC

>1387

GTCATAAACACGTCGCCATCATTTTATCCTCTAGTTTCTGGGTCAGATGAATGGAGTCA  
AGAAATCCAGCTTTCTGTTGTCATTGACGACAGCATTGGCTGCATACCCTGTGGTCTG  
CTGTTTTGCTGATCTTGGGTG

>1388

TTTATCCTCTAGTTTCTGGGTCAGATGAATGGAGTCAAGAAATCCAGCTTTCTGTTGTC  
ATTGACGACAGCATTGGCTGCATACCCTGTGGTCTGCTGTTTTGCTGATCTTGGGTGG  
ATTCTCCACTTCCTCCCCCTC

>1389

TGTTTTGCTGATCTTGGGTGGATTCTCCACTTCCTCCCCCTTCACCCCCATTCCCCTGTT  
GCTCGTTCAGGTACGGGGGATGTGAGTGAGAGGGGTGGGGTGGGGATATCTGGAAG  
TTGATCTCATCACCCCTAGCCGG

>1390

GGTGGATTCTCCACTTCCTCCCCCTTCACCCCCATTCCCCTGTTGCTCGTTCAGGTACG  
GGGGATGTGAGTGAGAGGGGTGGGGTGGGGATATCTGGAAGTTGATCTCATCACCCC  
TAGCCGGAATCTGCTCTGACCCT

>1391

CCATTCCCCTGTTGCTCGTTCAGGTACGGGGGATGTGAGTGAGAGGGGTGGGGTGGG  
GATATCTGGAAGTTGATCTCATCACCCCTAGCCGGAATCTGCTCTGACCCTGCCTCCTC  
GACAGCTCAGAGGCTTAACTTGT

>1392

TCAGGTACGGGGGATGTGAGTGAGAGGGGTGGGGTGGGGATATCTGGAAGTTGATCT  
CATCACCCCTAGCCGGAATCTGCTCTGACCCTGCCTCCTCGACAGCTCAGAGGCTTAA  
CTTGTTGGAAGTGTGGCAGAGCTA

>1393

GGTGGGGATATCTGGAAGTTGATCTCATCACCCCTAGCCGGAATCTGCTCTGACCCTGC  
CTCCTCGACAGCTCAGAGGCTTAACTTGTGGAAGTGTGGCAGAGCTAAACGTAGCCG  
ACTTTTTCCAGTGGGTGCGAAAA

>1394

TCATCACCCCTAGCCGGAATCTGCTCTGACCCTGCCTCCTCGACAGCTCAGAGGCTTAA  
CTTGTTGGAAGTGTGGCAGAGCTAAACGTAGCCGACTTTTTCCAGTGGGTGCGAAAAA  
TAACCGCCACTAAGGTGTGTCTT

>1395

CCTAGCCGGAATCTGCTCTGACCCTGCCTCCTCGACAGCTCAGAGGCTTAACTTGTGG  
AAAGTGTGGCAGAGCTAAACGTAGCCGACTTTTTCCAGTGGGTGCGAAAAATAACCGC  
CACTAAGGTGTGTCTTCTTGATGC

>1396

CTGCTCTGACCCTGCCTCCTCGACAGCTCAGAGGCTTAACTTGTGGAAGTGTGGCAG  
AGCTAAACGTAGCCGACTTTTTCCAGTGGGTGCGAAAAATAACCGCCACTAAGGTGTG  
TCTTCTTGATGCTTGTACCGCTCA

>1397

TGTGGAAGTGTGGCAGAGCTAAACGTAGCCGACTTTTTCCAGTGGGTGCGAAAAATA  
ACCGCCACTAAGGTGTGTCTTCTTGATGCTTGTACCGCTCAGAAATAGACTGAGGTTAT  
GTTTGTTTTTGCTCAAACCTTCC

>1398

CGACTTTTTCCAGTGGGTGCGAAAAATAACCGCCACTAAGGTGTGTCTTCTTGATGCTT  
GTACCGCTCAGAAATAGACTGAGGTTATGTTTGTGTTTTGCTCAAACCTTCCTAAAGAGG  
AAACCCGCTCCCCAAAGTTGAC

>1399

TCTTCTTGATGCTTGTACCGCTCAGAAATAGACTGAGGTTATGTTTGTGTTTTGCTCAAAC  
TTTCCTAAAGAGGAAACCCGCTCCCCAAAGTTGACCAGATAGATGTATCATCTTTCCGG  
ATGTGAATTATTTTCGGCTGTG

>1400

TTCTTGATGCTTGTACCGCTCAGAAATAGACTGAGGTTATGTTTGTGTTTTGCTCAAACCT  
TCCTAAAGAGGAAACCCGCTCCCCAAAGTTGACCAGATAGATGTATCATCTTTCCGGAT  
GTGAATTATTTTCGGCTGTGTG

>1401

CTGAGGTTATGTTTGTGTTTTGCTCAAACCTTCCTAAAGAGGAAACCCGCTCCCCAAAGT  
TGACCAGATAGATGTATCATCTTTCCGGATGTGAATTATTTTCGGCTGTGTGCTATGAGAA  
CTGGGTATGGTGGGAAGTAAT

>1402

GCTCCCCAAAGTTGACCAGATAGATGTATCATCTTTCCGGATGTGAATTATTTTCGGCTGT  
GTGCTATGAGAACTGGGTATGGTGGGAAGTAATTGTTTTTCTGGCTCTCATCAGGTCCT  
GGTTCCTGGTTGCTTTTCTTT

>1403

ATAGATGTATCATCTTTCCGGATGTGAATTATTTTCGGCTGTGTGCTATGAGAACTGGGTA  
TGGTGGGAAGTAATTGTTTTTCTGGCTCTCATCAGGTCCTGGTTCCTGGTTGCTTTTCTT  
TACCCGAGAGGGCCACAAAA

>1404

GAATTATTTTCGGCTGTGTGCTATGAGAACTGGGTATGGTGGGAAGTAATTGTTTTTCTG  
GCTCTCATCAGGTCCTGGTTCCTGGTTGCTTTTCTTTACCCGAGAGGGCCACAAAAGAT  
ACCACTCTCCTGAGACTTCCAA

>1405

TATGGTGGGAAGTAATTGTTTTTCTGGCTCTCATCAGGTCCTGGTTCCTGGTTGCTTTTC  
TTTACCCGAGAGGGCCACAAAAGATACCACTCTCCTGAGACTTCCAAGTTCCCCTTCA  
GCAAGACCCTCATTCCTCTGGG

>1406

TGGTGGGAAGTAATTGTTTTTCTGGCTCTCATCAGGTCCTGGTTCCTGGTTGCTTTTCTT  
TACCCGAGAGGGCCACAAAAGATACCACTCTCCTGAGACTTCCAAGTTCCCCTTCAGC  
AAGACCCTCATTCCTCTGGGGA

>1407

AATTGTTTTTCTGGCTCTCATCAGGTCCTGGTTCCTGGTTGCTTTTCTTTACCCGAGAGG  
GCCACAAAAGATACCACTCTCCTGAGACTTCCAAGTTCCCCTTCAGCAAGACCCTCAT  
TCCTCTGGGGAGAGAGGGAGAG

>1408

CTCATCAGGTCCTGGTTCCTGGTTGCTTTTCTTTACCCGAGAGGGCCACAAAAGATACC  
ACTCTCCTGAGACTTCCAAGTTCCCCTTCAGCAAGACCCTCATTCCTCTGGGGAGAGA  
GGGAGAGTTGGCCATGTTATATT

>1409

GCCACAAAAGATAACCACTCTCCTGAGACTTCCAAGTTCCCCTTCAGCAAGACCCTCAT  
TCCCTCTGGGGAGAGAGGGGAGAGTTGGCCATGTTATATTCGAAAGAGCCTGGGTATTGG  
AATTGGCCATATTTAGTGGTGAGA

>1410

CACAAAAGATAACCACTCTCCTGAGACTTCCAAGTTCCCCTTCAGCAAGACCCTCATT  
CTCTGGGGAGAGAGGGGAGAGTTGGCCATGTTATATTCGAAAGAGCCTGGGTATTGGAA  
TTGGCCATATTTAGTGGTGAGAGC

>1411

AAGTTCCCCTTCAGCAAGACCCTCATTCCTCTGGGGAGAGAGGGGAGAGTTGGCCATGT  
TATATTCGAAAGAGCCTGGGTATTGGAATTGGCCATATTTAGTGGTGAGAGCCTGTGAT  
ACTTATTTAACCTTTCTGGGCCT

>1412

CTGGGGAGAGAGGGGAGAGTTGGCCATGTTATATTCGAAAGAGCCTGGGTATTGGAATT  
GGCCATATTTAGTGGTGAGAGCCTGTGATACTTATTTAACCTTTCTGGGCCTTGTTTCAC  
TCACTACATTTTTTTTTTTTTTT

>1413

GAGAGGGAGAGTTGGCCATGTTATATTCGAAAGAGCCTGGGTATTGGAATTGGCCATAT  
TTAGTGGTGAGAGCCTGTGATACTTATTTAACCTTTCTGGGCCTTGTTTCACTCACTACA  
TTTTTTTTTTTTTTTTTTTTTT

>1414

CTGTGATACTTATTTAACCTTTCTGGGCCTTGTTTCACTCACTACATTTTTTTTTTTTTTT  
TTTTTTGAGACGGAGTCTCGCTCTGTCACCGGGCTGGAGTGCAATGGCGTGATCTCAG  
CTCACTGCAGTCTCCACCTCC

>1415

TACTTATTTAACCTTTCTGGGCCTTGTTTCACTCACTACATTTTTTTTTTTTTTTTTTTTG  
AGACGGAGTCTCGCTCTGTCACCGGGCTGGAGTGCAATGGCGTGATCTCAGCTCACTG  
CAGTCTCCACCTCCCGGGTT

>1416

TGTTTCACTCACTACATTTTTTTTTTTTTTTTTTTTGAGACGGAGTCTCGCTCTGTCAC  
CGGGCTGGAGTGCAATGGCGTGATCTCAGCTCACTGCAGTCTCCACCTCCCGGGTTCA  
AGCGATTCTCCTGCCTCAGCCT

>1417

TTTTTTTTTTTTTTTTTTGAGACGGAGTCTCGCTCTGTCACCGGGCTGGAGTGCAATGG  
CGTGATCTCAGCTCACTGCAGTCTCCACCTCCCGGGTTCAAGCGATTCTCCTGCCTCAG  
CCTCCTGAGTAGCTGGGACTAC

>1418

TTTTTTTTGAGACGGAGTCTCGCTCTGTCACCGGGCTGGAGTGCAATGGCGTGATCTC  
AGCTCACTGCAGTCTCCACCTCCCGGGTTCAAGCGATTCTCCTGCCTCAGCCTCCTGA  
GTAGCTGGGACTACAGGCACCTGT

>1419

GAGTGCAATGGCGTGATCTCAGCTCACTGCAGTCTCCACCTCCCGGGTTCAAGCGATT  
CTCCTGCCTCAGCCTCCTGAGTAGCTGGGACTACAGGCACCTGTCACCCCGCCAGCT  
AATTTTTTGTATTTTATAGAGAGA

>1420

GGCGTGATCTCAGCTCACTGCAGTCTCCACCTCCCGGGTTCAAGCGATTCTCCTGCCTC  
AGCCTCCTGAGTAGCTGGGACTACAGGCACCTGTCACCCCGCCAGCTAATTTTTTGTA  
TTTTTAGTAGAGACAGGGTTTC

>1421

GGGTTCAAGCGATTCTCCTGCCTCAGCCTCCTGAGTAGCTGGGACTACAGGCACCTGT  
CACCCCCGCCAGCTAATTTTTTTGTATTTTTAGTAGAGACAGGGTTTCACCATGTTGGCC  
AGAATGGTCTCGATCTCTTGACC

>1422

CCTCAGCCTCCTGAGTAGCTGGGACTACAGGCACCTGTCACCCCGCCAGCTAATTTTT  
TGTATTTTTAGTAGAGACAGGGTTTCACCATGTTGGCCAGAATGGTCTCGATCTCTTGA  
CCTTGCGATCCATCCACCTCGG

>1423

CAGCCTCCTGAGTAGCTGGGACTACAGGCACCTGTCACCCCGCCAGCTAATTTTTTGT  
ATTTTTAGTAGAGACAGGGTTTCACCATGTTGGCCAGAATGGTCTCGATCTCTTGACCT  
TGCGATCCATCCACCTCGGCCT

>1424

GGCACCTGTCACCCCGCCAGCTAATTTTTTTGTATTTTTAGTAGAGACAGGGTTTCACC  
ATGTTGGCCAGAATGGTCTCGATCTCTTGACCTTGCGATCCATCCACCTCGGCCTCCCA  
AAGTGCTGGGATTACAGCTGTG

>1425

GTTTCACCATGTTGGCCAGAATGGTCTCGATCTCTTGACCTTGCGATCCATCCACCTCG  
GCCTCCCAAAGTGCTGGGATTACAGCTGTGAGCCACCCCGCCCGGCCTTCACTCACTT  
CTTAAAATGGAGACGGTCAACAG

>1426

GCCAGAATGGTCTCGATCTCTTGACCTTGCGATCCATCCACCTCGGCCTCCCAAAGTGC  
TGGGATTACAGCTGTGAGCCACCCCGCCCGGCCTTCACTCACTTCTTAAAATGGAGAC  
GGTCAACAGGGTTGGTGCTGAAT

>1427

GCCTCCCAAAGTGCTGGGATTACAGCTGTGAGCCACCCCGCCCGGCCTTCACTCACTT  
CTTAAAATGGAGACGGTCAACAGGGTTGGTGCTGAATTAATGAAGTAAGATCCAGAAA  
TCACTAGAGCTGTGATGGGCACAT

>1428

TGCTGGGATTACAGCTGTGAGCCACCCCGCCCGGCCTTCACTCACTTCTTAAAATGGA  
GACGGTCAACAGGGTTGGTGCTGAATTAATGAAGTAAGATCCAGAAATCACTAGAGCT  
GTGATGGGCACATAGTCACCGCAG

>1429

CACCCCGCCCGGCCTTCACTCACTTCTTAAAATGGAGACGGTCAACAGGGTTGGTGCT  
GAATTAATGAAGTAAGATCCAGAAATCACTAGAGCTGTGATGGGCACATAGTCACCGC  
AGCGGTGGAGAACTGACCATCTGT

>1430

CCGCCCCGCCTTCACTCACTTCTTAAAATGGAGACGGTCAACAGGGTTGGTGCTGAAT  
TAATGAAGTAAGATCCAGAAATCACTAGAGCTGTGATGGGCACATAGTCACCGCAGCG  
GTGGAGAACTGACCATCTGTCCCT



>1431

CACTTCTTAAAATGGAGACGGTCAACAGGGTTGGTGCTGAATTAATGAAGTAAGATCC  
AGAAATCACTAGAGCTGTGATGGGCACATAGTCACCGCAGCGGTGGAGAACTGACCAT  
CTGTCCCTTGTGTTGTTTAGGCCT

>1432

GGTTGGTGCTGAATTAATGAAGTAAGATCCAGAAATCACTAGAGCTGTGATGGGCACAT  
AGTCACCGCAGCGGTGGAGAACTGACCATCTGTCCCTTGTGTTGTTTAGGCCTCATCTC  
TGCATGGTCCTCATTGGCTCTG

>1433

CTGAATTAATGAAGTAAGATCCAGAAATCACTAGAGCTGTGATGGGCACATAGTCACC  
GCAGCGGTGGAGAACTGACCATCTGTCCCTTGTGTTGTTTAGGCCTCATCTCTGCATGG  
TCCTCATTGGCTCTGAGTTCTAG

>1434

CTAGAGCTGTGATGGGCACATAGTCACCGCAGCGGTGGAGAACTGACCATCTGTCCCT  
TGTGTTGTTTAGGCCTCATCTCTGCATGGTCCTCATTGGCTCTGAGTTCTAGTGTGTAGT  
GTCCACAGTGCCACCCTCCATG

>1435

GTGGAGAACTGACCATCTGTCCCTTGTGTTGTTTAGGCCTCATCTCTGCATGGTCCTCA  
TTGGCTCTGAGTTCTAGTGTGTAGTGTCCACAGTGCCACCCTCCATGAGGGTTGTGTTG  
ACTGTGAGGTGGTGCAGAGAAT

>1436

AACTGACCATCTGTCCCTTGTGTTGTTTAGGCCTCATCTCTGCATGGTCCTCATTGGCTC  
TGAGTTCTAGTGTGTAGTGTCCACAGTGCCACCCTCCATGAGGGTTGTGTTGACTGTG  
AGGTGGTGCAGAGAATGTCCCT

>1437

CTTGTGTTGTTTAGGCCTCATCTCTGCATGGTCCTCATTGGCTCTGAGTTCTAGTGTGTA  
GTGTCCACAGTGCCACCCTCCATGAGGGTTGTGTTGACTGTGAGGTGGTGCAGAGAAT  
GTCCCTGTCCTTGTGAGCATAT

>1438

TCATTGGCTCTGAGTTCTAGTGTGTAGTGTCCACAGTGCCACCCTCCATGAGGGTTGTG  
TTGACTGTGAGGTGGTGCAGAGAATGTCCCTGTCCTTGTGAGCATATGACAGCAAGAC  
ACTGGCCCTGGAATCCTCCGTGT

>1439

CTGAGTTCTAGTGTGTAGTGTCCACAGTGCCACCCTCCATGAGGGTTGTGTTGACTGTG  
AGGTGGTGCAGAGAATGTCCCTGTCCTTGTGAGCATATGACAGCAAGACACTGGCCCT  
GGAATCCTCCGTGTCACATGTGG

>1440

CACAGTGCCACCCTCCATGAGGGTTGTGTTGACTGTGAGGTGGTGCAGAGAATGTCCC  
TGTCCCTTGTGAGCATATGACAGCAAGACACTGGCCCTGGAATCCTCCGTGTCACATGTG  
GGCTGCTGACAGGAAGAATGTGC

>1441

GTCCTTGTGAGCATATGACAGCAAGACACTGGCCCTGGAATCCTCCGTGTCACATGTG  
GGCTGCTGACAGGAAGAATGTGCTTTTGTGTTGTTGTTGTTGTTGTTGAGGCAGAGTCTTA  
CTCTGTGCGCCAGGCTGCAGTGC

>1442

TTGTGAGCATATGACAGCAAGACACTGGCCCTGGAATCCTCCGTGTCACATGTGGGCT  
GCTGACAGGAAGAATGTGCTTTTGTGTTGTTGTTGTTGTTGAGGCAGAGTCTTACTCT  
GTCGCCCAGGCTGCAGTGCAGTG

>1443

GGAATCCTCCGTGTCACATGTGGGCTGCTGACAGGAAGAATGTGCTTTTGTGTTGTTG  
TTGTTGTTGAGGCAGAGTCTTACTCTGTCGCCCAGGCTGCAGTGCAGTGGCATGATCTT  
GGCTCACTGCAACCTCTACTTC

>1444

TCCTCCGTGTCACATGTGGGCTGCTGACAGGAAGAATGTGCTTTTGTGTTGTTGTTGT  
TGTTGAGGCAGAGTCTTACTCTGTCGCCCAGGCTGCAGTGCAGTGGCATGATCTTGGC  
TCACTGCAACCTCTACTTCCCGG

>1445

CTGCTGACAGGAAGAATGTGCTTTTGTGTTGTTGTTGTTGTTGAGGCAGAGTCTTACT  
CTGTCGCCCAGGCTGCAGTGCAGTGGCATGATCTTGGCTCACTGCAACCTCTACTTCCC  
GGGTTCAAGTGATTCTCCTGCC

>1446

CTCTGTCGCCCAGGCTGCAGTGCAGTGGCATGATCTTGGCTCACTGCAACCTCTACTTC  
CCGGGTTCAAGTGATTCTCCTGCCTCAGCCTCCTGAGCAGCTGGGACTACAGATGTGT  
ACCACCATGCCCCGACTAATTTT

>1447

CAGTGCAGTGGCATGATCTTGGCTCACTGCAACCTCTACTTCCCGGGTTCAAGTGATTC  
TCCTGCCTCAGCCTCCTGAGCAGCTGGGACTACAGATGTGTACCACCATGCCCCGACTAA  
TTTTTGTATTTTATAGTAGAGAT

>1448

ATGATCTTGGCTCACTGCAACCTCTACTTCCCGGGTTCAAGTGATTCTCCTGCCTCAGC  
CTCCTGAGCAGCTGGGACTACAGATGTGTACCACCATGCCCCGACTAATTTTGTATTTT  
AGTAGAGATGGGGTTTCACCA

>1449

CACTGCAACCTCTACTTCCCGGGTTCAAGTGATTCTCCTGCCTCAGCCTCCTGAGCAGC  
TGGGACTACAGATGTGTACCACCATGCCCCGACTAATTTTGTATTTTATAGTAGAGATGGG  
GTTTCACCATGTTGGTCAGGC

>1450

GCCTCAGCCTCCTGAGCAGCTGGGACTACAGATGTGTACCACCATGCCCCGACTAATTTT  
TGTATTTTATAGTAGAGATGGGGTTTCACCATGTTGGTCAGGCTGGCCTGGAACCTCTGG  
CCTTAAGTGATCCACCTGTCTC

>1451

AGATGTGTACCACCATGCCCCGACTAATTTTGTATTTTATAGTAGAGATGGGGTTTCACCA  
TGTTGGTCAGGCTGGCCTGGAACCTCCTGGCCTTAAGTGATCCACCTGTCTCGGCCTCCC  
ATAGTGCTGGGATTATAGGTG

>1452

TTTTTGTATTTTATAGTAGAGATGGGGTTTCACCATGTTGGTCAGGCTGGCCTGGAACCTC  
CTGGCCTTAAGTGATCCACCTGTCTCGGCCTCCCATAGTGCTGGGATTATAGGTGTGTG  
CCACCCTGCTGGGGCCGAGAATG

>1453

TTCACCATGTTGGTCAGGCTGGCCTGGAACCTCCTGGCCTTAAGTGATCCACCTGTCTCG  
GCCTCCCATAGTGCTGGGATTATAGGTGTGTGCCACCCTGCTGGGCCGAGAATGTGCTT  
TTGACTGAGGGTGGAAAGTCAG

>1454

CAGGCTGGCCTGGAACCTCCTGGCCTTAAGTGATCCACCTGTCTCGGCCTCCCATAGTGC  
TGGGATTATAGGTGTGTGCCACCCTGCTGGGCCGAGAATGTGCTTTTGACTGAGGGTG  
GAAAGTCAGCAGCTGCAGCCCAA

>1455

TAAGTGATCCACCTGTCTCGGCCTCCCATAGTGCTGGGATTATAGGTGTGTGCCACCCT  
GCTGGGCCGAGAATGTGCTTTTGACTGAGGGTGGAAAGTCAGCAGCTGCAGCCCAAG  
AAGTTAGAGCCAGGGGCAGTGCCT

>1456

CGGCCTCCCATAGTGCTGGGATTATAGGTGTGTGCCACCCTGCTGGGCCGAGAATGTGC  
TTTTGACTGAGGGTGGAAAGTCAGCAGCTGCAGCCCAAGAAGTTAGAGCCAGGGGCA  
GTGCCTTTGATGGGAAGCTTGGGG

>1457

ATAGTGCTGGGATTATAGGTGTGTGCCACCCTGCTGGGCCGAGAATGTGCTTTTGACTG  
AGGGTGGAAAGTCAGCAGCTGCAGCCCAAGAAGTTAGAGCCAGGGGCAGTGCCTTTG  
ATGGGAAGCTTGGGGGTCTAAAGA

>1458

TGTGTGCCACCCTGCTGGGCCGAGAATGTGCTTTTGACTGAGGGTGGAAAGTCAGCA  
GCTGCAGCCCAAGAAGTTAGAGCCAGGGGCAGTGCCTTTGATGGGAAGCTTGGGGGT  
CTAAAGAAATCAGAAAGGGGAGAAAA

>1459

GACTGAGGGTGGAAAGTCAGCAGCTGCAGCCCAAGAAGTTAGAGCCAGGGGCAGTG  
CCTTTGATGGGAAGCTTGGGGGTCTAAAGAAATCAGAAAGGGGAGAAAATAATCCTGC  
GTGTGCTCAGCCCTCACTCAGATCAA

>1460

GTCAGCAGCTGCAGCCCAAGAAGTTAGAGCCAGGGGCAGTGCCTTTGATGGGAAGCT  
TGGGGGTCTAAAGAAATCAGAAAGGGGAGAAAATAATCCTGCGTGTGCTCAGCCCTC  
ACTCAGATCAACAGCCCCTCGGGTCC

>1461

TGCCTTTGATGGGAAGCTTGGGGGTCTAAAGAAATCAGAAAGGGGAGAAAATAATCCT  
GCGTGTGCTCAGCCCTCACTCAGATCAACAGCCCCTCGGGTCCCAGCTAGATGTACTTT  
GTAGAAGGCTTTTTTTCTCCCC

>1462

GGAAGCTTGGGGGTCTAAAGAAATCAGAAAGGGGAGAAAATAATCCTGCGTGTGCTC  
AGCCCTCACTCAGATCAACAGCCCCTCGGGTCCCAGCTAGATGTACTTTGTAGAAGGC  
TTTTTTCTCCCCCTCACCTCAA

>1463

TCAGAAAGGGGAGAAAATAATCCTGCGTGTGCTCAGCCCTCACTCAGATCAACAGCCC  
CTCGGGTCCCAGCTAGATGTACTTTGTAGAAGGCTTTTTTTCTCCCCCTCACCTCAA  
ACTCCAGGATTAATGTGCTATTC

>1464  
TAATCCTGCGTGTGCTCAGCCCTCACTCAGATCAACAGCCCCCTCGGGTCCCAGCTAGAT  
GTACTTTGTAGAAGGCTTTTTTTCTCCCCCTCACCCCTCAAAACTCCAGGATTAATGTGCT  
ATTCCCTTTTTTCTACTGTTC

>1465  
TCCTGCGTGTGCTCAGCCCTCACTCAGATCAACAGCCCCCTCGGGTCCCAGCTAGATGT  
ACTTTGTAGAAGGCTTTTTTTCTCCCCCTCACCCCTCAAAACTCCAGGATTAATGTGCTAT  
TCCCTTTTTTCTACTGTTCTCT

>1466  
GCCCCCTCGGGTCCCAGCTAGATGTACTTTGTAGAAGGCTTTTTTTCTCCCCCTCACCCCT  
CAAAACTCCAGGATTAATGTGCTATTCCCTTTTTTCTACTGTTCTCTGTCTCCCCCAAC  
CCATCAGCAGTCTGAGAAATG

>1467  
CCTCAAAACTCCAGGATTAATGTGCTATTCCCTTTTTTCTACTGTTCTCTGTCTCCCCC  
AACCCATCAGCAGTCTGAGAAATGCTATGGTGGAAAAAAAAAAAAACAACAGCCCTATAA  
CCAGTACAAACAAAAAGCCAAG

>1468  
CAAAACTCCAGGATTAATGTGCTATTCCCTTTTTTCTACTGTTCTCTGTCTCCCCCAAC  
CCATCAGCAGTCTGAGAAATGCTATGGTGGAAAAAAAAAAAAACAACAGCCCTATAACCA  
GTACAAACAAAAAGCCAAGACA

>1469  
ACTGTTCTCTGTCTCCCCCAACCCATCAGCAGTCTGAGAAATGCTATGGTGGAAAAA  
AAAAACAACAGCCCTATAACCAGTACAAACAAAAAGCCAAGACAAAAAAAAAAAAA  
AAAAAAAATCAGAAGGGGAGATTTTG

>1470  
CTCCCCCAACCCATCAGCAGTCTGAGAAATGCTATGGTGGAAAAAAAAAAAAACAACA  
GCCCTATAACCAGTACAAACAAAAAGCCAAGACAAAAAAAAAAAAAAAAAAAAATCA  
GAAGGGGAGATTTTGAGGCCAGGAAGC

>1471  
CAGTCTGAGAAATGCTATGGTGGAAAAAAAAAAAAACAACAGCCCTATAACCAGTACAA  
ACAAAAAGCCAAGACAAAAAAAAAAAAAAAAAAAAATCAGAAGGGGAGATTTTGAGG  
CCAGGAAGCCATGGCATTCACTGGAAA

>1472  
AAAAAAAACAACAGCCCTATAACCAGTACAAACAAAAAGCCAAGACAAAAAAAAAAAA  
AAAAAAAAAATCAGAAGGGGAGATTTTGAGGCCAGGAAGCCATGGCATTCACTGGAA  
ATATATCAGTGATAAAATAACAGGCTA

>1473  
AAAAACAACAGCCCTATAACCAGTACAAACAAAAAGCCAAGACAAAAAAAAAAAAA  
AAAAAATCAGAAGGGGAGATTTTGAGGCCAGGAAGCCATGGCATTCACTGGAAATAT  
ATCAGTGATAAAATAACAGGCTACAG

>1474  
CTATAACCAGTACAAACAAAAAGCCAAGACAAAAAAAAAAAAAAAAAAAAATCAGAA  
GGGGAGATTTTGAGGCCAGGAAGCCATGGCATTCACTGGAAATATATCAGTGATAAAAT  
AACAGGCTACAGGGTTTATTTTATT

>1475

AAAAAAAAAAAAATCAGAAGGGGAGATTTTGAGGCCAGGAAGCCATGGCATTCACT  
GGAAATATATCAGTGATAAAATAACAGGCTACAGGGTTTATTTTATTTTATTTTAAAGTCA  
ATAGGCCTGAGTGTTGGTAAAG

>1476

TCAGAAGGGGAGATTTTGAGGCCAGGAAGCCATGGCATTCACTGGAAATATATCAGTG  
ATAAAATAACAGGCTACAGGGTTTATTTTATTTTATTTTAAAGTCAATAGGCCTGAGTGT  
TGGTAAAGACTAGATACCCAGC

>1477

GGGAGATTTTGAGGCCAGGAAGCCATGGCATTCACTGGAAATATATCAGTGATAAAATA  
ACAGGCTACAGGGTTTATTTTATTTTATTTTAAAGTCAATAGGCCTGAGTGTTGGTAAAG  
ACTAGATACCCAGCAATCCTT

>1478

ATGGCATTCACTGGAAATATATCAGTGATAAAATAACAGGCTACAGGGTTTATTTTATTT  
TATTTTAAAGTCAATAGGCCTGAGTGTTGGTAAAGACTAGATACCCAGCAATCCTTCTT  
GCATTTCTTCTTGGGGTCGGG

>1479

AAATATATCAGTGATAAAATAACAGGCTACAGGGTTTATTTTATTTTATTTTAAAGTCAAT  
AGGCCTGAGTGTTGGTAAAGACTAGATACCCAGCAATCCTTCTTGCATTTCTTCTTGGG  
GTCGGGGGGCAGAAGGGAAT

>1480

TGATAAAATAACAGGCTACAGGGTTTATTTTATTTTATTTTAAAGTCAATAGGCCTGAGT  
GTTGGTAAAGACTAGATACCCAGCAATCCTTCTTGCATTTCTTCTTGGGGTCGGGGGGC  
AGAAGGGAATGGAGAGGAAAT

>1481

AAATAACAGGCTACAGGGTTTATTTTATTTTATTTTAAAGTCAATAGGCCTGAGTGTTGG  
TAAAGACTAGATACCCAGCAATCCTTCTTGCATTTCTTCTTGGGGTCGGGGGGCAGAAG  
GGAATGGAGAGGAAATGAAGG

>1482

GGCCTGAGTGTTGGTAAAGACTAGATACCCAGCAATCCTTCTTGCATTTCTTCTTGGGG  
TCGGGGGGCAGAAGGGAATGGAGAGGAAATGAAGGCGGATTGCTGGTAAGTGAGGC  
AGGAAGGCAGGGAGTTTATTATGGA

>1483

CTGAGTGTTGGTAAAGACTAGATACCCAGCAATCCTTCTTGCATTTCTTCTTGGGGTCG  
GGGGGCAGAAGGGAATGGAGAGGAAATGAAGGCGGATTGCTGGTAAGTGAGGCAGG  
AAGGCAGGGAGTTTATTATGGAATG

>1484

GGTAAAGACTAGATACCCAGCAATCCTTCTTGCATTTCTTCTTGGGGTCGGGGGGCAGA  
AGGGAATGGAGAGGAAATGAAGGCGGATTGCTGGTAAGTGAGGCAGGAAGGCAGGG  
AGTTTATTATGGAATGTCATCGGTA

>1485

GATACCCAGCAATCCTTCTTGCATTTCTTCTTGGGGTCGGGGGGCAGAAGGGAATGGA  
GAGGAAATGAAGGCGGATTGCTGGTAAGTGAGGCAGGAAGGCAGGGAGTTTATTATG  
GAATGTCATCGGTAAGTTTCCCAT

>1486  
TCTTGGGGTCGGGGGGCAGAAGGGAATGGAGAGGAAATGAAGGCGGATTGCTGGTAA  
GTGAGGCAGGAAGGCAGGGAGTTTATTATGGAATGTCATCGGTAAGTTTCCCATGATT  
TGATCCCAAGCTGGTGTGGAGTGA  
>1487  
TCGGGGGGCAGAAGGGAATGGAGAGGAAATGAAGGCGGATTGCTGGTAAGTGAGGC  
AGGAAGGCAGGGAGTTTATTATGGAATGTCATCGGTAAGTTTCCCATGATTTGATCCC  
AAGCTGGTGTGGAGTGAAGGGTAAG  
>1488  
GAAATGAAGGCGGATTGCTGGTAAGTGAGGCAGGAAGGCAGGGAGTTTATTATGGAAT  
GTCATCGGTAAGTTTCCCATGATTTGATCCCAAGCTGGTGTGGAGTGAAGGGTAAGCT  
GTTGGCTCAACAGATAGTGAGAA  
>1489  
AGTGAGGCAGGAAGGCAGGGAGTTTATTATGGAATGTCATCGGTAAGTTTCCCATGAT  
TTGATCCCAAGCTGGTGTGGAGTGAAGGGTAAGCTGTTGGCTCAACAGATAGTGAGAA  
TCAAACCTAGTGGAGTTGTAGAT  
>1490  
AAGGCAGGGAGTTTATTATGGAATGTCATCGGTAAGTTTCCCATGATTTGATCCCAAG  
CTGGTGTGGAGTGAAGGGTAAGCTGTTGGCTCAACAGATAGTGAGAATCAAACCTAGT  
GGAGTTGTAGATCCTGTTTCCTG  
>1491  
AGGGAGTTTATTATGGAATGTCATCGGTAAGTTTCCCATGATTTGATCCCAAGCTGGTG  
TGGAGTGAAGGGTAAGCTGTTGGCTCAACAGATAGTGAGAATCAAACCTAGTGGAGTT  
GTAGATCCTGTTTCCTGCAGCG  
>1492  
TTTATTATGGAATGTCATCGGTAAGTTTCCCATGATTTGATCCCAAGCTGGTGTGGAGT  
GAAGGGTAAGCTGTTGGCTCAACAGATAGTGAGAATCAAACCTAGTGGAGTTGTAGAT  
CCTGTTTCCTGCAGCGGACAGC  
>1493  
CATCGGTAAGTTTCCCATGATTTGATCCCAAGCTGGTGTGGAGTGAAGGGTAAGCTGT  
TGGCTCAACAGATAGTGAGAATCAAACCTAGTGGAGTTGTAGATCCTGTTTCCTGCAGC  
GGACAGCAAGATGTACAAGCCG  
>1494  
ATTTGATCCCAAGCTGGTGTGGAGTGAAGGGTAAGCTGTTGGCTCAACAGATAGTGAG  
AATCAAACCTAGTGGAGTTGTAGATCCTGTTTCCTGCAGCGGACAGCAAGATGTACAA  
GCCGTCCACTGCAGGAATGACGTG  
>1495  
AGGGTAAGCTGTTGGCTCAACAGATAGTGAGAATCAAACCTAGTGGAGTTGTAGATCC  
TGTTTCCTGCAGCGGACAGCAAGATGTACAAGCCGTCCACTGCAGGAATGACGTGCTG  
TAAAAGGGATGCAGTGTCAAGTGT  
>1496  
GCTGTTGGCTCAACAGATAGTGAGAATCAAACCTAGTGGAGTTGTAGATCCTGTTTCCT  
GCAGCGGACAGCAAGATGTACAAGCCGTCCACTGCAGGAATGACGTGCTGTAAAAGG  
GATGCAGTGTCAAGTGTAGTCATG

>1497

TCAAACCTTAGTGGAGTTGTAGATCCTGTTTCCTGCAGCGGACAGCAAGATGTACAAGC  
CGTCCACTGCAGGAATGACGTGCTGTAAAAGGGATGCAGTGTCAAGTGTAGTCATGGA  
TGGGTGGGAAGACCAGACAAAGGC

>1498

AGATCCTGTTTCCTGCAGCGGACAGCAAGATGTACAAGCCGTCCACTGCAGGAATGAC  
GTGCTGTAAAAGGGATGCAGTGTCAAGTGTAGTCATGGATGGGTGGGAAGACCAGAC  
AAAGGCATCCAATGGGACTGACTTA

>1499

TTTCCTGCAGCGGACAGCAAGATGTACAAGCCGTCCACTGCAGGAATGACGTGCTGTA  
AAAGGGATGCAGTGTCAAGTGTAGTCATGGATGGGTGGGAAGACCAGACAAAGGCAT  
CCAATGGGACTGACTTACCTAAACA

>1500

CAGCGGACAGCAAGATGTACAAGCCGTCCACTGCAGGAATGACGTGCTGTAAAAGGG  
ATGCAGTGTCAAGTGTAGTCATGGATGGGTGGGAAGACCAGACAAAGGCATCCAATGG  
GACTGACTTACCTAAACAAACCAGA

>1501

CCGTCCACTGCAGGAATGACGTGCTGTAAAAGGGATGCAGTGTCAAGTGTAGTCATGG  
ATGGGTGGGAAGACCAGACAAAGGCATCCAATGGGACTGACTTACCTAAACAAACCA  
GAAGGAAGTCAGAACAGTGGGAAGA

>1502

GTGTAGTCATGGATGGGTGGGAAGACCAGACAAAGGCATCCAATGGGACTGACTTACC  
TAAACAAACCAGAAGGAAGTCAGAACAGTGGGAAGATCTGATAGATAAGCAGTATTCT  
GCAGGCAGATGAAGGAGCAAGCTT

>1503

TAGTCATGGATGGGTGGGAAGACCAGACAAAGGCATCCAATGGGACTGACTTACCTAA  
ACAAACCAGAAGGAAGTCAGAACAGTGGGAAGATCTGATAGATAAGCAGTATTCTGC  
AGGCAGATGAAGGAGCAAGCTTTGG

>1504

AAGGCATCCAATGGGACTGACTTACCTAAACAAACCAGAAGGAAGTCAGAACAGTGG  
GAAGATCTGATAGATAAGCAGTATTCTGCAGGCAGATGAAGGAGCAAGCTTTGGGCCC  
CCAAATCTTCACCAGTGCATCCACA

>1505

ATCCAATGGGACTGACTTACCTAAACAAACCAGAAGGAAGTCAGAACAGTGGGAAGA  
TCTGATAGATAAGCAGTATTCTGCAGGCAGATGAAGGAGCAAGCTTTGGGCCCCCAA  
TCTTCACCAGTGCATCCACATTACA

>1506

CAATGGGACTGACTTACCTAAACAAACCAGAAGGAAGTCAGAACAGTGGGAAGATCT  
GATAGATAAGCAGTATTCTGCAGGCAGATGAAGGAGCAAGCTTTGGGCCCCCAAATCT  
TCACCAGTGCATCCACATTACAGAG

>1507

GACTTACCTAAACAAACCAGAAGGAAGTCAGAACAGTGGGAAGATCTGATAGATAAG  
CAGTATTCTGCAGGCAGATGAAGGAGCAAGCTTTGGGCCCCCAAATCTTCACCAGTGC  
ATCCACATTACAGAGGATAATGCCT

>1508

GATCTGATAGATAAGCAGTATTCTGCAGGCAGATGAAGGAGCAAGCTTTGGGCCCCCA  
AATCTTCACCAGTGCATCCACATTACAGAGGATAATGCCTGAGGGAGGGGAAGATCAT  
CTCAGGATTCTGGAACACTGGGCC

>1509

AGTATTCTGCAGGCAGATGAAGGAGCAAGCTTTGGGCCCCCAAATCTTCACCAGTGCA  
TCCACATTACAGAGGATAATGCCTGAGGGAGGGGAAGATCATCTCAGGATTCTGGAAC  
ACTGGGCCCTCCCTTTCTTATTCC

>1510

GATGAAGGAGCAAGCTTTGGGCCCCCAAATCTTCACCAGTGCATCCACATTACAGAGG  
ATAATGCCTGAGGGAGGGGAAGATCATCTCAGGATTCTGGAACACTGGGCCCTCCCTT  
TCTTATTCCAAAAGGCTGGAGCAG

>1511

AATGCCTGAGGGAGGGGAAGATCATCTCAGGATTCTGGAACACTGGGCCCTCCCTTTC  
TTATTCCAAAAGGCTGGAGCAGTTCTGCATGTAGGCTTCTCTGGAAATGGTCTAGGAAC  
CAGCTCATCCAGGCCAGGAGCAC

>1512

GAGGGAGGGGAAGATCATCTCAGGATTCTGGAACACTGGGCCCTCCCTTTCTTATTCC  
AAAAGGCTGGAGCAGTTCTGCATGTAGGCTTCTCTGGAAATGGTCTAGGAACCAGCTC  
ATCCAGGCCAGGAGCACCTGATCA

>1513

TGGGCCCTCCCTTTCTTATTCCAAAAGGCTGGAGCAGTTCTGCATGTAGGCTTCTCTGG  
AAATGGTCTAGGAACCAGCTCATCCAGGCCAGGAGCACCTGATCATTCTCAGAGTTAC  
GTACATATGCGATAAGATTGCAG

>1514

TCCCTTTCTTATTCCAAAAGGCTGGAGCAGTTCTGCATGTAGGCTTCTCTGGAAATGGT  
CTAGGAACCAGCTCATCCAGGCCAGGAGCACCTGATCATTCTCAGAGTTACGTACATAT  
GCGATAAGATTGCAGGGAACAG

>1515

AAGGCTGGAGCAGTTCTGCATGTAGGCTTCTCTGGAAATGGTCTAGGAACCAGCTCAT  
CCAGGCCAGGAGCACCTGATCATTCTCAGAGTTACGTACATATGCGATAAGATTGCAGG  
GAACAGTATAGTTCTATAGACTT

>1516

GGTCTAGGAACCAGCTCATCCAGGCCAGGAGCACCTGATCATTCTCAGAGTTACGTAC  
ATATGCGATAAGATTGCAGGGAACAGTATAGTTCTATAGACTTAAGTGTGAACATAGTC  
CTCATTTATAGTCCCTAGTCTCC

>1517

GAACCAGCTCATCCAGGCCAGGAGCACCTGATCATTCTCAGAGTTACGTACATATGCGA  
TAAGATTGCAGGGAACAGTATAGTTCTATAGACTTAAGTGTGAACATAGTCCTCATTTAT  
AGTCCCTAGTCTCCCATGGCT

>1518

GGAGCACCTGATCATTCTCAGAGTTACGTACATATGCGATAAGATTGCAGGGAACAGTA  
TAGTTCTATAGACTTAAGTGTGAACATAGTCCTCATTTATAGTCCCTAGTCTCCCATGGC  
TCACGCAGCTTGGTCTTTATG



>1519

CAGAGTTACGTACATATGCGATAAGATTGCAGGGAACAGTATAGTTCTATAGACTTAAG  
TGTGAACATAGTCCTCATTTATAGTCCCTAGTCTCCCATGGCTCACGCAGCTTGGTCTTT  
ATGTGTTTCTGAATTTAGTGC

>1520

ATATGCGATAAGATTGCAGGGAACAGTATAGTTCTATAGACTTAAGTGTGAACATAGTC  
CTCATTTATAGTCCCTAGTCTCCCATGGCTCACGCAGCTTGGTCTTTATGTGTTTCTGAA  
TTTAGTGCTGCAGAGGCACAA

>1521

ATAAGATTGCAGGGAACAGTATAGTTCTATAGACTTAAGTGTGAACATAGTCCTCATTTA  
TAGTCCCTAGTCTCCCATGGCTCACGCAGCTTGGTCTTTATGTGTTTCTGAATTTAGTGC  
TGCAGAGGCACAATGGGGTC

>1522

TAGTCCTCATTTATAGTCCCTAGTCTCCCATGGCTCACGCAGCTTGGTCTTTATGTGTTT  
CTGAATTTAGTGCTGCAGAGGCACAATGGGGTCTGGTTTCTGGATCTTATACAGACAAG  
CACTTAGGTCAGCTGCAGTGG

>1523

ATTTATAGTCCCTAGTCTCCCATGGCTCACGCAGCTTGGTCTTTATGTGTTTCTGAATTTA  
GTGCTGCAGAGGCACAATGGGGTCTGGTTTCTGGATCTTATACAGACAAGCACTTAGG  
TCAGCTGCAGTGGATGTCCTG

>1524

TGGTCTTTATGTGTTTCTGAATTTAGTGCTGCAGAGGCACAATGGGGTCTGGTTTCTGG  
ATCTTATACAGACAAGCACTTAGGTCAGCTGCAGTGGATGTCCTGCACAGACACCGTC  
GCAACTCTTGCCTGGTTCCTTTT

>1525

GTTTCTGAATTTAGTGCTGCAGAGGCACAATGGGGTCTGGTTTCTGGATCTTATACAGA  
CAAGCACTTAGGTCAGCTGCAGTGGATGTCCTGCACAGACACCGTCGCAACTCTTGCC  
TGGTTCCTTTTTGTTTTTGGAGA

>1526

TGAATTTAGTGCTGCAGAGGCACAATGGGGTCTGGTTTCTGGATCTTATACAGACAAGC  
ACTTAGGTCAGCTGCAGTGGATGTCCTGCACAGACACCGTCGCAACTCTTGCCTGGTT  
CCTTTTTGTTTTTGGAGATGGAG

>1527

CAATGGGGTCTGGTTTCTGGATCTTATACAGACAAGCACTTAGGTCAGCTGCAGTGGAT  
GTCCTGCACAGACACCGTCGCAACTCTTGCCTGGTTCCTTTTTGTTTTTGGAGATGGAG  
TCTCGCTCTGTCTCCAGGCTG

>1528

GGTCAGCTGCAGTGGATGTCCTGCACAGACACCGTCGCAACTCTTGCCTGGTTCCTTT  
TTGTTTTTGGAGATGGAGTCTCGCTCTGTCTCCAGGCTGGAGTGCAGTGGCGCGATC  
TCAGCTCACTGCAAGCTCTGCCTC

>1529

CTGCAGTGGATGTCCTGCACAGACACCGTCGCAACTCTTGCCTGGTTCCTTTTTGTTTT  
TGGAGATGGAGTCTCGCTCTGTCTCCAGGCTGGAGTGCAGTGGCGCGATCTCAGCTC  
ACTGCAAGCTCTGCCTCCAGGT

>1530

ACAGACACCGTCGCAACTCTTGCCTGGTTCCTTTTTGTTTTTGGAGATGGAGTCTCGCT  
CTGTCTCCCAGGCTGGAGTGCAGTGGCGCGATCTCAGCTCACTGCAAGCTCTGCCTCC  
CAGGTTACGCTATTCTCCTGCC

>1531

GTTCTTTTTGTTTTTGGAGATGGAGTCTCGCTCTGTCTCCCAGGCTGGAGTGCAGTGG  
CGCGATCTCAGCTCACTGCAAGCTCTGCCTCCCAGGTTACGCTATTCTCCTGCCTCAG  
CCTCCCAAGTAGTTGGGACTAC

>1532

TTTTTGGAGATGGAGTCTCGCTCTGTCTCCCAGGCTGGAGTGCAGTGGCGCGATCTCA  
GCTCACTGCAAGCTCTGCCTCCCAGGTTACGCTATTCTCCTGCCTCAGCCTCCCAAGT  
AGTTGGGACTACAGGCACCCGCC

>1533

AGTCTCGCTCTGTCTCCCAGGCTGGAGTGCAGTGGCGCGATCTCAGCTCACTGCAAGC  
TCTGCCTCCCAGGTTACGCTATTCTCCTGCCTCAGCCTCCCAAGTAGTTGGGACTACA  
GGCACCCGCCACACGCCCCGGCT

>1534

GAGTGCAGTGGCGCGATCTCAGCTCACTGCAAGCTCTGCCTCCCAGGTTACGCTATT  
CTCCTGCCTCAGCCTCCCAAGTAGTTGGGACTACAGGCACCCGCCACACGCCCCGGCT  
AATTTTTTGTATTTTAGTAGAGA

>1535

GGCGCGATCTCAGCTCACTGCAAGCTCTGCCTCCCAGGTTACGCTATTCTCCTGCCTC  
AGCCTCCCAAGTAGTTGGGACTACAGGCACCCGCCACACGCCCCGGCTAATTTTTTGT  
TTTTTAGTAGAGACAGGGTTTC

>1536

GCGATCTCAGCTCACTGCAAGCTCTGCCTCCCAGGTTACGCTATTCTCCTGCCTCAGC  
CTCCCAAGTAGTTGGGACTACAGGCACCCGCCACACGCCCCGGCTAATTTTTTGTATTT  
TTAGTAGAGACAGGGTTTCACC

>1537

CACTGCAAGCTCTGCCTCCCAGGTTACGCTATTCTCCTGCCTCAGCCTCCCAAGTAGT  
TGGGACTACAGGCACCCGCCACACGCCCCGGCTAATTTTTTGTATTTTAGTAGAGACA  
GGGTTTCACCGTGTTAGCCAGT

>1538

CCTCAGCCTCCCAAGTAGTTGGGACTACAGGCACCCGCCACACGCCCCGGCTAATTTT  
TTGTATTTTAGTAGAGACAGGGTTTCACCGTGTTAGCCAGTATGGTCTCGATCTCCTGA  
ACTCGTGATCCACCTGCCTCGG

>1539

CAGCCTCCCAAGTAGTTGGGACTACAGGCACCCGCCACACGCCCCGGCTAATTTTTTG  
TATTTTAGTAGAGACAGGGTTTCACCGTGTTAGCCAGTATGGTCTCGATCTCCTGAAC  
TCGTGATCCACCTGCCTCGGCCT

>1540

GCCTCCCAAGTAGTTGGGACTACAGGCACCCGCCACACGCCCCGGCTAATTTTTTGTAT  
TTTTAGTAGAGACAGGGTTTCACCGTGTTAGCCAGTATGGTCTCGATCTCCTGAACCTCG  
TGATCCACCTGCCTCGGCCTCC

>1541

CCCAAGTAGTTGGGACTACAGGCACCCGCCACCACGCCCCGGCTAATTTTTTTGTATTTTT  
AGTAGAGACAGGGTTTCACCGTGTTAGCCAGTATGGTCTCGATCTCCTGAACTCGTGAT  
CCACCTGCCTCGGCCTCCCAA

>1542

TACAGGCACCCGCCACCACGCCCCGGCTAATTTTTTTGTATTTTTTAGTAGAGACAGGGTTT  
CACCGTGTTAGCCAGTATGGTCTCGATCTCCTGAACTCGTGATCCACCTGCCTCGGCCT  
CCCAAAGTGCTGGGATTACAGG

>1543

GTTTCACCGTGTTAGCCAGTATGGTCTCGATCTCCTGAACTCGTGATCCACCTGCCTCG  
GCCTCCCAAAGTGCTGGGATTACAGGTGTGAGCCACCACGCCCCGGCCTATTGCCTGGT  
TCTTGAAGGGATTCTCAGGAACC

>1544

GCCAGTATGGTCTCGATCTCCTGAACTCGTGATCCACCTGCCTCGGCCTCCCAAAGTGC  
TGGGATTACAGGTGTGAGCCACCACGCCCCGGCCTATTGCCTGGTTCTTGAAGGGATTCT  
CAGGAACCACAGGGAATGTCTG

>1545

CTCGGCCTCCCAAAGTGCTGGGATTACAGGTGTGAGCCACCACGCCCCGGCCTATTGCC  
TGGTTCTTGAAGGGATTCTCAGGAACCACAGGGAATGTCTGAGCCAGCTTTCTGGATC  
CGTGTGTACAGCCCTTCCCAGAGG

>1546

CAAAGTGCTGGGATTACAGGTGTGAGCCACCACGCCCCGGCCTATTGCCTGGTTCTTGA  
AGGGATTCTCAGGAACCACAGGGAATGTCTGAGCCAGCTTTCTGGATCCGTGTGTACA  
GCCCTTCCCAGAGGCTTTGTGGAG

>1547

GTGAGCCACCACGCCCCGGCCTATTGCCTGGTTCTTGAAGGGATTCTCAGGAACCACAG  
GGAATGTCTGAGCCAGCTTTCTGGATCCGTGTGTACAGCCCTTCCCAGAGGCTTTGTG  
GAGCCAGCTGTACGGTGCATGAGC

>1548

CTGGTTCTTGAAGGGATTCTCAGGAACCACAGGGAATGTCTGAGCCAGCTTTCTGGAT  
CCGTGTGTACAGCCCTTCCCAGAGGCTTTGTGGAGCCAGCTGTACGGTGCATGAGCTT  
TGTGGCTAAGATATCAGAGTTCTG

>1549

AAGGGATTCTCAGGAACCACAGGGAATGTCTGAGCCAGCTTTCTGGATCCGTGTGTAC  
AGCCCTTCCCAGAGGCTTTGTGGAGCCAGCTGTACGGTGCATGAGCTTTGTGGCTAAG  
ATATCAGAGTTCTGCCTGGCCCTT

>1550

GAACCACAGGGAATGTCTGAGCCAGCTTTCTGGATCCGTGTGTACAGCCCTTCCCAGA  
GGCTTTGTGGAGCCAGCTGTACGGTGCATGAGCTTTGTGGCTAAGATATCAGAGTTCTG  
CCTGGCCCTTGGCCTTGGTCTCT

>1551

ATCCGTGTGTACAGCCCTTCCCAGAGGCTTTGTGGAGCCAGCTGTACGGTGCATGAGC  
TTTGTGGCTAAGATATCAGAGTTCTGCCTGGCCCTTGGCCTTGGTCTCTCTCAGATGGT  
CAGCTGCTCTGTTTTTAGTGTT

>1552

TGTACAGCCCTTCCCAGAGGCTTTGTGGAGCCAGCTGTACGGTGCATGAGCTTTGTGG  
CTAAGATATCAGAGTTCTGCCTGGCCCTTGGCCTTGGTCTCTCTCAGATGGTCAGCTGC  
TCTGTTTTTAGTGGTTGATCATG

>1553

TGTACGGTGCATGAGCTTTGTGGCTAAGATATCAGAGTTCTGCCTGGCCCTTGGCCTTG  
GTCTCTCTCAGATGGTCAGCTGCTCTGTTTTTAGTGGTTGATCATGTAGAAGGCCAACA  
GGTGTTGACCTTGGTTTAGGCT

>1554

CTAAGATATCAGAGTTCTGCCTGGCCCTTGGCCTTGGTCTCTCTCAGATGGTCAGCTGC  
TCTGTTTTTAGTGGTTGATCATGTAGAAGGCCAACAGGTGTTGACCTTGGTTTAGGCTA  
CTTTTGGGATTTTTGAGGTTTC

>1555

TCTGCCTGGCCCTTGGCCTTGGTCTCTCTCAGATGGTCAGCTGCTCTGTTTTTAGTGGT  
TGATCATGTAGAAGGCCAACAGGTGTTGACCTTGGTTTAGGCTACTTTTGGGATTTTTG  
AGGTTTCCTGAGACTCTTGGTT

>1556

CAGATGGTCAGCTGCTCTGTTTTTAGTGGTTGATCATGTAGAAGGCCAACAGGTGTTGA  
CCTTGGTTTAGGCTACTTTTGGGATTTTTGAGGTTTCCTGAGACTCTTGGTTTTCTTTCA  
TCATCCCGTCCAGAACCTCTG

>1557

TTTAGTGGTTGATCATGTAGAAGGCCAACAGGTGTTGACCTTGGTTTAGGCTACTTTTG  
GGATTTTTGAGGTTTCCTGAGACTCTTGGTTTTCTTTCATCATCCCGTCCAGAACCTCTG  
ATGTCAAATAAATTCTGTTT

>1558

GATCATGTAGAAGGCCAACAGGTGTTGACCTTGGTTTAGGCTACTTTTGGGATTTTTGA  
GGTTTCCTGAGACTCTTGGTTTTCTTTCATCATCCCGTCCAGAACCTCTGATGTCAAATA  
AAATTCTGTTTGGAAAAGGGT

>1559

TGGTTTAGGCTACTTTTGGGATTTTTGAGGTTTCCTGAGACTCTTGGTTTTCTTTCATCA  
TCCCGTCCAGAACCTCTGATGTCAAATAAATTCTGTTTGGAAAAGGGTATGCTGTAGA  
ATAATGATAGCCACAGCAATG

>1560

GAGACTCTTGGTTTTCTTTCATCATCCCGTCCAGAACCTCTGATGTCAAATAAATTCT  
GTTTGGAAAAGGGTATGCTGTAGAATAATGATAGCCACAGCAATGATATTAATAATACCT  
TTTATCGGTTGCAGCATTTTC

>1561

TTTCTTTCATCATCCCGTCCAGAACCTCTGATGTCAAATAAATTCTGTTTGGAAAAGG  
GTATGCTGTAGAATAATGATAGCCACAGCAATGATATTAATAATACCTTTTATCGGTTGCA  
GCATTTTCTTCTTTGCAAAG

>1562

TCCAGAACCTCTGATGTCAAATAAATTCTGTTTGGAAAAGGGTATGCTGTAGAATAAT  
GATAGCCACAGCAATGATATTAATAATACCTTTTATCGGTTGCAGCATTTTCTTCTTTGCA  
AAGCACCTCTAATGACTTTA

>1563

GGAAAAGGGTATGCTGTAGAAATAATGATAGCCACAGCAATGATATTAATAATACCTTTTA  
TCGGTTGCAGCATTTTCTTCTTTGCAAAGCACCTCTAATGACTTTATCTCTCTTGCCCTC  
ACAGCCTTCCTTGAGTGGGT

>1564

AATAATGATAGCCACAGCAATGATATTAATAATACCTTTTATCGGTTGCAGCATTTTCTTC  
TTTGCAAAGCACCTCTAATGACTTTATCTCTCTTGCCCTCACAGCCTTCCTTGAGTGGGT  
ACAGGTCCATAATCCCATA

>1565

CTTTTATCGGTTGCAGCATTTTCTTCTTTGCAAAGCACCTCTAATGACTTTATCTCTCTTG  
CCCTCACAGCCTTCCTTGAGTGGGTACAGGTCCATAATCCCATATCTGTGATAATGAAG  
TCTGAAAAGCTCTGAAAAC

>1566

TGCAGCATTTTCTTCTTTGCAAAGCACCTCTAATGACTTTATCTCTCTTGCCCTCACAGC  
CTTCCTTGAGTGGGTACAGGTCCATAATCCCATATCTGTGATAATGAAGTCTGAAAAGC  
TCTGAAAACATAAAAAGTTTGC

>1567

TATCTCTCTTGCCCTCACAGCCTTCCTTGAGTGGGTACAGGTCCATAATCCCATATCTGT  
GATAATGAAGTCTGAAAAGCTCTGAAAACATAAAAAGTTTGCAGTAACTCATTAGTG  
GCAAAACCTGATCTGAACTGAT

>1568

TGCCCTCACAGCCTTCCTTGAGTGGGTACAGGTCCATAATCCCATATCTGTGATAATGA  
AGTCTGAAAAGCTCTGAAAACATAAAAAGTTTGCAGTAACTCATTAGTGGCAAAACC  
TGATCTGAACTGATGTGAGGCTA

>1569

GGTACAGGTCCATAATCCCATATCTGTGATAATGAAGTCTGAAAAGCTCTGAAAACATAA  
AAAGTTTGCAGTAACTCATTAGTGGCAAAACCTGATCTGAACTGATGTGAGGCTATA  
TTTATCCTGCTTAGTTTGAATA

>1570

AATCCCATATCTGTGATAATGAAGTCTGAAAAGCTCTGAAAACATAAAAAGTTTGCAGTA  
AACTCATTAGTGGCAAAACCTGATCTGAACTGATGTGAGGCTATATTTATCCTGCTTAG  
TTTGAATATTCATATGTTTTG

>1571

AAAGCTCTGAAAACATAAAAAGTTTGCAGTAACTCATTAGTGGCAAAACCTGATCTG  
AACTGATGTGAGGCTATATTTATCCTGCTTAGTTTGAATATTCATATGTTTGTCTGCAAAA  
ATATTAATGTGTTTGATTACA

>1572

GTTTGCAGTAACTCATTAGTGGCAAAACCTGATCTGAACTGATGTGAGGCTATATTTA  
TCCTGCTTAGTTTGAATATTCATATGTTTTGTCTGCAAAAATATTAATGTGTTTGATTACAG  
AGTGCTGCCCTAGACTCTG

>1573

CTATATTTATCCTGCTTAGTTTGAATATTCATATGTTTTGTCTGCAAAAATATTAATGTGTTT  
GATTACAGAGTGCTGCCCTAGACTCTGCTGGGGCTGTAAACACGATAGGTGTCAGAG  
TACCTTTCTTTTTTTTTTTT

>1574  
ATATTTATCCTGCTTAGTTTGAATATTCATATGTTTTGCTGCAAAAATATTAATGTGTTTGA  
TTACAGAGTGCTGCCCTAGACTCTGCTGGGGCTGTAAACACGATAGGTGTCAGAGTA  
CCTTTCTTTTTTTTTTTTTTTT

>1575  
TGCAAAAATATTAATGTGTTTGATTACAGAGTGCTGCCCTAGACTCTGCTGGGGCTGTT  
AAACACGATAGGTGTCAGAGTACCTTTCTTTTTTTTTTTTTTTTTTTTTTTTTTTGAGACGGA  
GTCTCGCTCTGTCGCCCAGGT

>1576  
ATATTAATGTGTTTGATTACAGAGTGCTGCCCTAGACTCTGCTGGGGCTGTAAACACG  
ATAGGTGTCAGAGTACCTTTCTTTTTTTTTTTTTTTTTTTTTTTTTTTGAGACGGAGTCTCGC  
TCTGTCGCCCAGGTCTGGACTG

>1577  
TCTGCTGGGGCTGTAAACACGATAGGTGTCAGAGTACCTTTCTTTTTTTTTTTTTTTTTTT  
TTTTTTTGAGACGGAGTCTCGCTCTGTCGCCCAGGTCTGGACTGCGGACTGCAGTGGCG  
CAATCTCGGCTCACTGCAAGCT

>1578  
GGGGCTGTAAACACGATAGGTGTCAGAGTACCTTTCTTTTTTTTTTTTTTTTTTTTTTTTTT  
GAGACGGAGTCTCGCTCTGTCGCCCAGGTCTGGACTGCGGACTGCAGTGGCGCAATCT  
CGGCTCACTGCAAGCTCCGCTT

>1579  
AGGTGTCAGAGTACCTTTCTTTTTTTTTTTTTTTTTTTTTTTTTTTGAGACGGAGTCTCGCTC  
TGTCGCCCAGGTCTGGACTGCGGACTGCAGTGGCGCAATCTCGGCTCACTGCAAGCTCC  
GCTTCCCGGGTTCATGCCATTC

>1580  
AGACGGAGTCTCGCTCTGTCGCCCAGGTCTGGACTGCGGACTGCAGTGGCGCAATCTC  
GGCTCACTGCAAGCTCCGCTTCCCGGGTTCATGCCATTCTCCTGCCTCAGCCTCCCGAG  
TAGCTGGGACTACAGGCGCCCGCC

>1581  
GACTGCAGTGGCGCAATCTCGGCTCACTGCAAGCTCCGCTTCCCGGGTTCATGCCATT  
CTCCTGCCTCAGCCTCCCGAGTAGCTGGGACTACAGGCGCCCGCCACCGCGCCCGGCT  
AATTTTTTGTATTTTATAGTAGAGA

>1582  
GGCGCAATCTCGGCTCACTGCAAGCTCCGCTTCCCGGGTTCATGCCATTCTCCTGCCTC  
AGCCTCCCGAGTAGCTGGGACTACAGGCGCCCGCCACCGCGCCCGGCTAATTTTTTGT  
ATTTTATAGTAGAGACGGGGTTTC

>1583  
GCAATCTCGGCTCACTGCAAGCTCCGCTTCCCGGGTTCATGCCATTCTCCTGCCTCAGC  
CTCCCGAGTAGCTGGGACTACAGGCGCCCGCCACCGCGCCCGGCTAATTTTTTGTATTT  
TTAGTAGAGACGGGGTTTCACC

>1584  
CACTGCAAGCTCCGCTTCCCGGGTTCATGCCATTCTCCTGCCTCAGCCTCCCGAGTAGC  
TGGGACTACAGGCGCCCGCCACCGCGCCCGGCTAATTTTTTGTATTTTATAGTAGAGACG  
GGGTTTCACCTTGTTAGCCAGG

>1585

CAGCCTCCCGAGTAGCTGGGACTACAGGCGCCCGCCACCGCGCCCGGCTAATTTTTTG  
TATTTTTAGTAGAGACGGGGTTTCACCTTGTTAGCCAGGATGGTCTCGATCTCCTGACC  
TCATGATCCACCCGCCTCGGCCT

>1586

GCCTCCCGAGTAGCTGGGACTACAGGCGCCCGCCACCGCGCCCGGCTAATTTTTGTAT  
TTTTAGTAGAGACGGGGTTTCACCTTGTTAGCCAGGATGGTCTCGATCTCCTGACCTCA  
TGATCCACCCGCCTCGGCCTCC

>1587

TACAGGCGCCCGCCACCGCGCCCGGCTAATTTTTGTATTTTTAGTAGAGACGGGGTTT  
CACCTTGTTAGCCAGGATGGTCTCGATCTCCTGACCTCATGATCCACCCGCCTCGGCCT  
CCCAAAGTGCTGGGATTACAGG

>1588

GTTTCACCTTGTTAGCCAGGATGGTCTCGATCTCCTGACCTCATGATCCACCCGCCTCG  
GCCTCCCAAAGTGCTGGGATTACAGGCGTGAGCACCGCGCCCGGCCAGAGTACCTTT  
CTAAAGTCTGAACAGTTTTGGTC

>1589

GCCAGGATGGTCTCGATCTCCTGACCTCATGATCCACCCGCCTCGGCCTCCCAAAGTGC  
TGGGATTACAGGCGTGAGCACCGCGCCCGGCCAGAGTACCTTTCTAAAGTCTGAACA  
GTTTTGGTCGTTGAAGCACCTGA

>1590

CCTCATGATCCACCCGCCTCGGCCTCCCAAAGTGCTGGGATTACAGGCGTGAGCACCG  
CGCCCGGCCAGAGTACCTTTCTAAAGTCTGAACAGTTTTGGTCGTTGAAGCACCTGA  
AGGTTTTGGATAAGGGATTATGAA

>1591

GCCTCGGCCTCCCAAAGTGCTGGGATTACAGGCGTGAGCACCGCGCCCGGCCAGAG  
TACCTTTCTAAAGTCTGAACAGTTTTGGTCGTTGAAGCACCTGAAGGTTTTGGATAAGG  
GATTATGAACGATTATCATTCTCT

>1592

TCCCAAAGTGCTGGGATTACAGGCGTGAGCACCGCGCCCGGCCAGAGTACCTTTCTA  
AAGTCTGAACAGTTTTGGTCGTTGAAGCACCTGAAGGTTTTGGATAAGGGATTATGAA  
CGATTATCATTCTCTATTGACAAA

>1593

ATTACAGGCGTGAGCACCGCGCCCGGCCAGAGTACCTTTCTAAAGTCTGAACAGTTT  
TGGTCGTTGAAGCACCTGAAGGTTTTGGATAAGGGATTATGAACGATTATCATTCTCTAT  
TGACAAATGAGGAAAATGAGAT

>1594

GGTCGTTGAAGCACCTGAAGGTTTTGGATAAGGGATTATGAACGATTATCATTCTCTATT  
GACAAATGAGGAAAATGAGATTTGGAGCAAGTAAGTGACTTCCCATGGTCACACAGCT  
ATAAATGGGTAGAACCAGGCAC

>1595

AGCACCTGAAGGTTTTGGATAAGGGATTATGAACGATTATCATTCTCTATTGACAAATG  
AGGAAAATGAGATTTGGAGCAAGTAAGTGACTTCCCATGGTCACACAGCTATAAATGG  
GTAGAACCAGGCACTCAGCTTGC

>1596

GGATAAGGGATTATGAACGATTATCATTCTCTATTGACAAATGAGGAAAATGAGATTTG  
GAGCAAGTAAGTGACTTCCCATGGTCACACAGCTATAAATGGGTAGAACCAGGCACTC  
AGCTTGCCTTCTAATTCACAGTC

>1597

TATCATTCTCTATTGACAAATGAGGAAAATGAGATTTGGAGCAAGTAAGTGACTTCCCA  
TGGTCACACAGCTATAAATGGGTAGAACCAGGCACTCAGCTTGCCTTCTAATTCACAGT  
CCTGGGCGCTCTGCACCAGGCC

>1598

GACAAATGAGGAAAATGAGATTTGGAGCAAGTAAGTGACTTCCCATGGTCACACAGCT  
ATAAATGGGTAGAACCAGGCACTCAGCTTGCCTTCTAATTCACAGTCCTGGGCGCTCTG  
CACCAGGCCATATAAGAACATGA

>1599

AGTGACTTCCCATGGTCACACAGCTATAAATGGGTAGAACCAGGCACTCAGCTTGCCT  
TCTAATTCACAGTCCTGGGCGCTCTGCACCAGGCCATATAAGAACATGAGCATTGCTCT  
TCTGGGTCAAATCCATCTGACCT

>1600

CAGCTATAAATGGGTAGAACCAGGCACTCAGCTTGCCTTCTAATTCACAGTCCTGGGCG  
CTCTGCACCAGGCCATATAAGAACATGAGCATTGCTCTTCTGGGTCAAATCCATCTGAC  
CTAGTCTTTGGTTGCCATCACC

>1601

TGGGTAGAACCAGGCACTCAGCTTGCCTTCTAATTCACAGTCCTGGGCGCTCTGCACC  
AGGCCATATAAGAACATGAGCATTGCTCTTCTGGGTCAAATCCATCTGACCTAGTCTTT  
GGTTGCCATCACCATGCCTAAGA

>1602

CTGGGCGCTCTGCACCAGGCCATATAAGAACATGAGCATTGCTCTTCTGGGTCAAATCC  
ATCTGACCTAGTCTTTGGTTGCCATCACCATGCCTAAGATAACCACCATTTGGAGGCTACA  
ACCATCTTCCTTGACGTCAATC

>1603

GAACATGAGCATTGCTCTTCTGGGTCAAATCCATCTGACCTAGTCTTTGGTTGCCATCA  
CCATGCCTAAGATAACCACCATTTGGAGGCTACAACCATCTTCCTTGACGTCAATCCTAAA  
GGTCAGGTGTAGCTTCTCTTAG

>1604

TCTTCTGGGTCAAATCCATCTGACCTAGTCTTTGGTTGCCATCACCATGCCTAAGATAACC  
ACCATTTGGAGGCTACAACCATCTTCCTTGACGTCAATCCTAAAGGTCAGGTGTAGCTTC  
TCTTAGTAGCTATTTATGGCT

>1605

GTTGCCATCACCATGCCTAAGATAACCACCATTTGGAGGCTACAACCATCTTCCTTGACGT  
CAATCCTAAAGGTCAGGTGTAGCTTCTCTTAGTAGCTATTTATGGCTGCCTTGTCATTCA  
CAGATTTGCCAAAATCCTTTT

>1606

CATCACCATGCCTAAGATAACCACCATTTGGAGGCTACAACCATCTTCCTTGACGTCAATC  
CTAAAGGTCAGGTGTAGCTTCTCTTAGTAGCTATTTATGGCTGCCTTGTCATTACAGAT  
TTGCCAAAATCCTTTTGAAT



>1607

CCACCATTTGGAGGCTACAACCATCTTCCTTGACGTCAATCCTAAAGGTCAGGTGTAGCT  
TCTCTTAGTAGCTATTTATGGCTGCCTTGTCATTCACAGATTTGCCAAAATCCTTTTTGA  
ATCCATTTCCATTTCCAGGAA

>1608

TTGACGTCAATCCTAAAGGTCAGGTGTAGCTTCTCTTAGTAGCTATTTATGGCTGCCTTG  
TCATTCACAGATTTGCCAAAATCCTTTTTGAATCCATTTCCATTTCCAGGAAGTATCCTT  
TTTAGGGGTGATGAATGACA

>1609

TAGCTATTTATGGCTGCCTTGTCATTCACAGATTTGCCAAAATCCTTTTTGAATCCATTTT  
CATTTCCAGGAAGTATCCTTTTTAGGGGTGATGAATGACAAGTTTATAATCTCCTGGGCT  
CCTGGAAATCTGGTCTTTT

>1610

TATTTATGGCTGCCTTGTCATTCACAGATTTGCCAAAATCCTTTTTGAATCCATTTCCATT  
TCCAGGAAGTATCCTTTTTAGGGGTGATGAATGACAAGTTTATAATCTCCTGGGCTCCT  
GGAAATCTGGTCTTTTGGAG

>1611

CCTTGTCATTCACAGATTTGCCAAAATCCTTTTTGAATCCATTTCCATTTCCAGGAAGTA  
TCCTTTTTAGGGGTGATGAATGACAAGTTTATAATCTCCTGGGCTCCTGGAAATCTGGT  
CTTTTGGAGAGAGGTTGTTGG

>1612

TATCCTTTTTAGGGGTGATGAATGACAAGTTTATAATCTCCTGGGCTCCTGGAAATCTGG  
TCTTTTGGAGAGAGGTTGTTGGTTGTGAAGATAGGAAGATGGCAGAAGGCTTTGTAGT  
GGTGAGGCCAGGTCTAGACCTA

>1613

TCCTTTTTAGGGGTGATGAATGACAAGTTTATAATCTCCTGGGCTCCTGGAAATCTGGT  
CTTTTGGAGAGAGGTTGTTGGTTGTGAAGATAGGAAGATGGCAGAAGGCTTTGTAGTG  
GTGAGGCCAGGTCTAGACCTAGC

>1614

GTTTATAATCTCCTGGGCTCCTGGAAATCTGGTCTTTTGGAGAGAGGTTGTTGGTTGTG  
AAGATAGGAAGATGGCAGAAGGCTTTGTAGTGGTGAGGCCAGGTCTAGACCTAGCTCT  
GCGTTTTTCAGCTCTGTCACCAT

>1615

CCTGGAAATCTGGTCTTTTGGAGAGAGGTTGTTGGTTGTGAAGATAGGAAGATGGCAG  
AAGGCTTTGTAGTGGTGAGGCCAGGTCTAGACCTAGCTCTGCGTTTTTCAGCTCTGTCA  
CCATTGACATCGTTTTTTTCATC

>1616

ATCTGGTCTTTTGGAGAGAGGTTGTTGGTTGTGAAGATAGGAAGATGGCAGAAGGCTT  
TGTAGTGGTGAGGCCAGGTCTAGACCTAGCTCTGCGTTTTTCAGCTCTGTCACCATTGA  
CATCGTTTTTTTCATCGTAAGCC

>1617

TGGAGAGAGGTTGTTGGTTGTGAAGATAGGAAGATGGCAGAAGGCTTTGTAGTGGTG  
AGGCCAGGTCTAGACCTAGCTCTGCGTTTTTCAGCTCTGTCACCATTGACATCGTTTTT  
TTCATCGTAAGCCTTAACTTCTTC

>1618

AGGCCAGGTCTAGACCTAGCTCTGCGTTTTTCAGCTCTGTCACCATTGACATCGTTTTT  
TTCATCGTAAGCCTTAACTTCTTCATTTTTAAAACTAGGCACTTCAGTGAGCTCTTCTG  
GATTGTTGCGCTCTTTAAAAA

>1619

TTTTCAGCTCTGTCACCATTGACATCGTTTTTTTCATCGTAAGCCTTAACTTCTTCATTTT  
TAAAACTAGGCACTTCAGTGAGCTCTTCTGGATTGTTGCGCTCTTTAAAAAATTCTTTT  
ATTCTTTGTGTACCCACTT

>1620

CACCATTGACATCGTTTTTTTCATCGTAAGCCTTAACTTCTTCATTTTTAAAACTAGGCA  
CTTCAGTGAGCTCTTCTGGATTGTTGCGCTCTTTAAAAAATTCTTTTATTCTTTGTGTA  
CCCACTTATATCTTCATGAA

>1621

TCTTTCTGGATTGTTGCGCTCTTTAAAAAATTCTTTTATTCTTTGTGTACCCACTTATATC  
TTCATGAAGTCCTTTTGGTTAATTGAATTTTGCTGTTTGGAACTCTGGATTGGCAGTTCA  
GCCAGTTAAGTAGGGGGTC

>1622

TACCCACTTATATCTTCATGAAGTCCTTTTGGTTAATTGAATTTTGCTGTTTTGGAATCTG  
GATTGGCAGTTCAGCCAGTTAAGTAGGGGGTCAGTTTGATTGATTCTGTGTGTTCTGA  
CTTTTTTTTTTTTTTAAAT

>1623

ACTTATATCTTCATGAAGTCCTTTTGGTTAATTGAATTTTGCTGTTTTGGAATCTGGATTG  
GCAGTTCAGCCAGTTAAGTAGGGGGTCAGTTTGATTGATTCTGTGTGTTCTGACTTTT  
TTTTTTTTTTTTTAAATACTTT

>1624

ATATCTTCATGAAGTCCTTTTGGTTAATTGAATTTTGCTGTTTTGGAATCTGGATTGGCA  
GTTTCAGCCAGTTAAGTAGGGGGTCAGTTTGATTGATTCTGTGTGTTCTGACTTTTTTTT  
TTTTTTTTTAAATACTTTAACC

>1625

CTTTTGGTTAATTGAATTTTGCTGTTTTGGAATCTGGATTGGCAGTTCAGCCAGTTAAGT  
AGGGGGTCAGTTTGATTGATTCTGTGTGTTCTGACTTTTTTTTTTTTTTAAATACTTTA  
ACCTGCTTAGGGTTACTGA

>1626

GGGGGTCAGTTTGATTGATTCTGTGTGTTCTGACTTTTTTTTTTTTTTAAATACTTTAA  
CCTGCTTAGGGTTACTGAGCCATCTGGGATCTAGACTGAACTCTTGGAACCTTTGAAGA  
TGATTTCCTTTATTTTATTT

>1627

TTGATTGATTCTGTGTGTTCTGACTTTTTTTTTTTTTTAAATACTTTAACCTGCTTAGG  
GTTACTGAGCCATCTGGGATCTAGACTGAACTCTTGGAACCTTTGAAGATGATTCCTT  
TATTTTATTTCAATGGAGG

>1628

TAAATACTTTAACCTGCTTAGGGTTACTGAGCCATCTGGGATCTAGACTGAACTCTTGG  
AACTTTTGAAGATGATTCCTTTATTTTATTTTCAATGGAGGAAAGTTGCCCACTCTTTC  
ATCTCAGTGAGAAGTCCCATT

>1629

GCCATCTGGGATCTAGACTGAACTCTTGGAACCTTTGAAGATGATTTCCCTTTATTTTATT  
TTCAATGGAGGAAAGTTGCCCACTCTTTCATCTCAGTGAGAAGTCCCATTTTAATTGTC  
CATCACTATTGGATGGAGCCG

>1630

TGGAACCTTTGAAGATGATTTCCCTTTATTTTATTTTCAATGGAGGAAAGTTGCCCACTCT  
TTCATCTCAGTGAGAAGTCCCATTTTAATTTGCCATCACTATTGGATGGAGCCGCTAATT  
GCTGGGAGGGAGAAAGCTAT

>1631

ACTTTTGAAGATGATTTCCCTTTATTTTATTTTCAATGGAGGAAAGTTGCCCACTCTTTCA  
TCTCAGTGAGAAGTCCCATTTTAATTTGCCATCACTATTGGATGGAGCCGCTAATTGCTG  
GGAGGGAGAAAGCTATAGTT

>1632

GAGGAAAGTTGCCCACTCTTTCATCTCAGTGAGAAGTCCCATTTTAATTTGCCATCACT  
ATTGGATGGAGCCGCTAATTGCTGGGAGGGAGAAAGCTATAGTTTAGCAACATGTTTTC  
CTCCTGCTCGTTCTAGGAAAAC

>1633

CTTTCATCTCAGTGAGAAGTCCCATTTTAATTTGCCATCACTATTGGATGGAGCCGCTAA  
TTGCTGGGAGGGAGAAAGCTATAGTTTAGCAACATGTTTTCTCCTGCTCGTTCTAGGA  
AACTATTATGAATCTTTAAA

>1634

CATCTCAGTGAGAAGTCCCATTTTAATTTGCCATCACTATTGGATGGAGCCGCTAATTGC  
TGGGAGGGAGAAAGCTATAGTTTAGCAACATGTTTTCTCCTGCTCGTTCTAGGAAAA  
CTATTATGAATCTTTAAAATAG

>1635

TCCCATTTTAATTTGCCATCACTATTGGATGGAGCCGCTAATTGCTGGGAGGGAGAAAG  
CTATAGTTTAGCAACATGTTTTCTCCTGCTCGTTCTAGGAAAACCTATTATGAATCTTTA  
AAATAGTGATTATCCTAAACT

>1636

ATGGAGCCGCTAATTGCTGGGAGGGAGAAAGCTATAGTTTAGCAACATGTTTTCTCCTCT  
GCTCGTTCTAGGAAAACCTATTATGAATCTTTAAAATAGTGATTATCCTAAACTGTAAAA  
TCAAATTCTATTCACAGCTCT

>1637

AAAGCTATAGTTTAGCAACATGTTTTCTCCTGCTCGTTCTAGGAAAACCTATTATGAATC  
TTTAAAATAGTGATTATCCTAAACTGTAAAAATCAAATTCTATTCACAGCTCTTTGATTTC  
TTGCTAATTCAGGAGAGAA

>1638

CTAGGAAAACCTATTATGAATCTTTAAAATAGTGATTATCCTAAACTGTAAAAATCAAATT  
CTATTCACAGCTCTTTGATTTCCTGCTAATTCAGGAGAGAACTTTTCCAATCACTTTAA  
TTTTTTTTATTAAATTTAAAG

>1639

AAAATAGTGATTATCCTAAACTGTAAAAATCAAATTCTATTCACAGCTCTTTGATTTCCT  
GCTAATTCAGGAGAGAACTTTTCCAATCACTTTAATTTTTTTTATTAAATTTAAAGCAAG  
CCCTGCTGAAAGCCCAAGTA

>1640  
AGTGATTATCCTAAACTGTTAAAATCAAATTCTATTCACAGCTCTTTGATTTCTTGCTAAT  
TCAGGAGAGAAACTTTTCCAATCACTTTAATTTTTTTTATTAATTTAAAGCAAGCCCTGC  
TGAAAGCCCAAGTATATAT

>1641  
CTCTTTGATTTCTTGCTAATTCAGGAGAGAAACTTTTCCAATCACTTTAATTTTTTTTATT  
AATTTAAAGCAAGCCCTGCTGAAAGCCCAAGTATATATGACTTAGAGTCTTACTAAATG  
AATACAGGTGTGCCTCAGTT

>1642  
TTGATTTCTTGCTAATTCAGGAGAGAAACTTTTCCAATCACTTTAATTTTTTTTATTAATT  
TAAAGCAAGCCCTGCTGAAAGCCCAAGTATATATGACTTAGAGTCTTACTAAATGAATA  
CAGGTGTGCCTCAGTTTGTC

>1643  
AGGAGAGAAACTTTTCCAATCACTTTAATTTTTTTTATTAATTTAAAGCAAGCCCTGCTG  
AAAGCCCAAGTATATATGACTTAGAGTCTTACTAAATGAATACAGGTGTGCCTCAGTTT  
GTCCATTGGAGGGTTTCTGAA

>1644  
TATTAATTTAAAGCAAGCCCTGCTGAAAGCCCAAGTATATATGACTTAGAGTCTTACTAA  
ATGAATACAGGTGTGCCTCAGTTTGTCCATTGGAGGGTTTCTGAATTTTCCATAACTAA  
AGATTTTCTATTCTGTTTTGG

>1645  
AGCAAGCCCTGCTGAAAGCCCAAGTATATATGACTTAGAGTCTTACTAAATGAATACAG  
GTGTGCCTCAGTTTGTCCATTGGAGGGTTTCTGAATTTTCCATAACTAAAGATTTTCTAT  
TCTGTTTTGGCTGGGTGTGTG

>1646  
AAAGCCCAAGTATATATGACTTAGAGTCTTACTAAATGAATACAGGTGTGCCTCAGTTT  
GTCCATTGGAGGGTTTCTGAATTTTCCATAACTAAAGATTTTCTATTCTGTTTTGGCTGG  
GTGTGTGGGGTGAAAGCTCTT

>1647  
TCTTACTAAATGAATACAGGTGTGCCTCAGTTTGTCCATTGGAGGGTTTCTGAATTTTCC  
ATAACTAAAGATTTTCTATTCTGTTTTGGCTGGGTGTGTGGGGTGAAAGCTCTTACTCTC  
TGGCAGTTATTTAAGTAGTA

>1648  
TGGAGGGTTTCTGAATTTTCCATAACTAAAGATTTTCTATTCTGTTTTGGCTGGGTGTGT  
GGGGTGAAAGCTCTTACTCTCTGGCAGTTATTTAAGTAGTAAGAAATTTGCTACAACCTC  
TTCCCCACCCCCACGTTTAC

>1649  
TTCCATAACTAAAGATTTTCTATTCTGTTTTGGCTGGGTGTGTGGGGTGAAAGCTCTTAC  
TCTCTGGCAGTTATTTAAGTAGTAAGAAATTTGCTACAACCTCTTCCCCACCCCCACGTTT  
TACAGATAGGAAATGAGCAC

>1650  
TAAAGATTTTCTATTCTGTTTTGGCTGGGTGTGTGGGGTGAAAGCTCTTACTCTCTGGC  
AGTTATTTAAGTAGTAAGAAATTTGCTACAACCTCTTCCCCACCCCCACGTTTACAGATA  
GGAAATGAGCACTTTGACTGT

>1651

AGATTTTCTATTCTGTTTTGGCTGGGTGTGTGGGGTGAAAGCTCTTACTCTCTGGCAGT  
TATTTAAGTAGTAAGAAATTTGCTACAACCTCTTCCCCACCCCCACGTTTTACAGATAGG  
AAATGAGCACTTTGACTGTCCA

>1652

CTTACTCTCTGGCAGTTATTTAAGTAGTAAGAAATTTGCTACAACCTCTTCCCCACCCCCA  
CGTTTTACAGATAGGAAATGAGCACTTTGACTGTCCAGGTCAGACTTCTGATTTTGCTA  
CTTACTAACTGTGACAGTGGT

>1653

CAGTTATTTAAGTAGTAAGAAATTTGCTACAACCTCTTCCCCACCCCCACGTTTTACAGAT  
AGGAAATGAGCACTTTGACTGTCCAGGTCAGACTTCTGATTTTGCTACTTACTAACTGT  
GACAGTGGTTGTGTTACTTAA

>1654

AAGAAATTTGCTACAACCTCTTCCCCACCCCCACGTTTTACAGATAGGAAATGAGCACTT  
TGACTGTCCAGGTCAGACTTCTGATTTTGCTACTTACTAACTGTGACAGTGGTTGTGTT  
ACTTAACTTCTGTGTGCCTGTT

>1655

ACAGATAGGAAATGAGCACTTTGACTGTCCAGGTCAGACTTCTGATTTTGCTACTTACT  
AACTGTGACAGTGGTTGTGTTACTTAACTTCTGTGTGCCTGTTTGCTCATTGTGAAAC  
AGAAATAATAGTAGTACCTACT

>1656

CTACTTACTAACTGTGACAGTGGTTGTGTTACTTAACTTCTGTGTGCCTGTTTGCTCATT  
TGTGAAACAGAAATAATAGTAGTACCTACTTCATTGGGTTGTTATAAGGATTCATCAGA  
AAATATTTATCCTGTGTGAGG

>1657

AACTGTGACAGTGGTTGTGTTACTTAACTTCTGTGTGCCTGTTTGCTCATTGTGAAAC  
AGAAATAATAGTAGTACCTACTTCATTGGGTTGTTATAAGGATTCATCAGAAAATATTTA  
TCCTGTGTGAGGAACGGTGGC

>1658

TGTGACAGTGGTTGTGTTACTTAACTTCTGTGTGCCTGTTTGCTCATTGTGAAACAGA  
AATAATAGTAGTACCTACTTCATTGGGTTGTTATAAGGATTCATCAGAAAATATTTATCCT  
GTGTGAGGAACGGTGGCACA

>1659

TCTGTGTGCCTGTTTGCTCATTGTGAAACAGAAATAATAGTAGTACCTACTTCATTGGG  
TTGTTATAAGGATTCATCAGAAAATATTTATCCTGTGTGAGGAACGGTGGCACATAGTA  
AGTGCTCCATAAGTGTTTGCT

>1660

TGTTTGCTCATTGTGAAACAGAAATAATAGTAGTACCTACTTCATTGGGTTGTTATAAG  
GATTCATCAGAAAATATTTATCCTGTGTGAGGAACGGTGGCACATAGTAAGTGCTCCAT  
AAGTGTTTGCTAGGGTATTTT

>1661

CTACTTCATTGGGTTGTTATAAGGATTCATCAGAAAATATTTATCCTGTGTGAGGAACGG  
TGGCACATAGTAAGTGCTCCATAAGTGTTTGCTAGGGTATTTTCTTGTCATTGTGTGAA  
GTAGGTCATGCTAGCCATGC

>1662

TTCATTGGGTTGTTATAAGGATTCATCAGAAAATATTTATCCTGTGTGAGGAACGGTGGC  
ACATAGTAAGTGCTCCATAAGTGTTTGCTAGGGTATTTTTCTTGTCATTGTGTGAAGTAG  
GTCATGCTAGCCATGCAGGG

>1663

TTCATCAGAAAATATTTATCCTGTGTGAGGAACGGTGGCACATAGTAAGTGCTCCATAA  
GTGTTTGCTAGGGTATTTTTCTTGTCATTGTGTGAAGTAGGTCATGCTAGCCATGCAGG  
GTGAAAAATGTGTTTCATGTTGG

>1664

GAGGAACGGTGGCACATAGTAAGTGCTCCATAAGTGTTTGCTAGGGTATTTTTCTTGTC  
ATTGTGTGAAGTAGGTCATGCTAGCCATGCAGGGTGAAAAATGTGTTTCATGTTGGTCCA  
GATCCTGCTTTCTCCCTGAGAC

>1665

GAACGGTGGCACATAGTAAGTGCTCCATAAGTGTTTGCTAGGGTATTTTTCTTGTCATTG  
TGTGAAGTAGGTCATGCTAGCCATGCAGGGTGAAAAATGTGTTTCATGTTGGTCCAGATC  
CTGCTTTCTCCCTGAGACCGT

>1666

ACATAGTAAGTGCTCCATAAGTGTTTGCTAGGGTATTTTTCTTGTCATTGTGTGAAGTAG  
GTCATGCTAGCCATGCAGGGTGAAAAATGTGTTTCATGTTGGTCCAGATCCTGCTTTCTC  
CCTGAGACCGTTCTTCCGCAT

>1667

TTTTCTTGTCATTGTGTGAAGTAGGTCATGCTAGCCATGCAGGGTGAAAAATGTGTTCA  
TGTTGGTCCAGATCCTGCTTTCTCCCTGAGACCGTTCTTCCGCATAGGCGTCAATCCGT  
ACAGTGCTGTAAAACTGCTGCC

>1668

AGTAGGTCATGCTAGCCATGCAGGGTGAAAAATGTGTTTCATGTTGGTCCAGATCCTGCT  
TTCTCCCTGAGACCGTTCTTCCGCATAGGCGTCAATCCGTACAGTGCTGTAAAACTGCT  
GCCTCGGGCACCTCATGTTTGG

>1669

ATGCAGGGTGAAAAATGTGTTTCATGTTGGTCCAGATCCTGCTTTCTCCCTGAGACCGTT  
CTTCCGCATAGGCGTCAATCCGTACAGTGCTGTAAAACTGCTGCCTCGGGCACCTCATG  
TTTGGGGCTGAGACATTGCTTC

>1670

GTGTTTCATGTTGGTCCAGATCCTGCTTTCTCCCTGAGACCGTTCTTCCGCATAGGCGTC  
AATCCGTACAGTGCTGTAAAACTGCTGCCTCGGGCACCTCATGTTTGGGGCTGAGACA  
TTGCTTCTGCGTCTTCCCCAGAA

>1671

TTCCGCATAGGCGTCAATCCGTACAGTGCTGTAAAACTGCTGCCTCGGGCACCTCATGT  
TTGGGGCTGAGACATTGCTTCTGCGTCTTCCCCAGAAGCTGATCTCTTGTAAGTGTTGGT  
GCCAGGGTACTCTTTGTCCCAT

>1672

AGTGCTGTAAAACTGCTGCCTCGGGCACCTCATGTTTGGGGCTGAGACATTGCTTCTG  
CGTCTTCCCCAGAAGCTGATCTCTTGTAAGTGTTGGCCAGGGTACTCTTTGTCCCAT  
GACCTGAGGCCTGGTGAGTCATT

>1673

TCATGTTTGGGGCTGAGACATTGCTTCTGCGTCTTCCCCAGAAGCTGATCTCTTGTACT  
GTGGTGGCCAGGGTACTCTTTGTCCCATTGACCTGAGGCCTGGTGAGTCATTCCAGTTC  
TCGTTTAAATTTAGCCGGGCAG

>1674

CTGCGTCTTCCCCAGAAGCTGATCTCTTGTACTGTGGTGGCCAGGGTACTCTTTGTCCC  
ATTGACCTGAGGCCTGGTGAGTCATTCCAGTTCTCGTTTAAATTTAGCCGGGCAGCGCT  
CCACTGCCATCGGGTCCAAATG

>1675

TGATCTCTTGTACTGTGGTGGCCAGGGTACTCTTTGTCCCATTGACCTGAGGCCTGGTG  
AGTCATTCCAGTTCTCGTTTAAATTTAGCCGGGCAGCGCTCCACTGCCATCGGGTCCAA  
ATGCCGGGGAGGCTCACTGATG

>1676

GTGGCCAGGGTACTCTTTGTCCCATTGACCTGAGGCCTGGTGAGTCATTCCAGTTCTCG  
TTTAAATTTAGCCGGGCAGCGCTCCACTGCCATCGGGTCCAAATGCCGGGGAGGCTCA  
CTGATGCGGTGTCCTGTTGCCTG

>1677

AGTCATTCCAGTTCTCGTTTAAATTTAGCCGGGCAGCGCTCCACTGCCATCGGGTCCAA  
ATGCCGGGGAGGCTCACTGATGCGGTGTCCTGTTGCCTGTGCACGTGGCCAGGCGTGC  
ACATCACTGTGCTTATGAGAGAG

>1678

CACTGCCATCGGGTCCAAATGCCGGGGAGGCTCACTGATGCGGTGTCCTGTTGCCTGT  
GCACGTGGCCAGGCGTGACATCACTGTGCTTATGAGAGAGATGAAGAGCACAGATAC  
CACCTTACTGATGGGGGTCCTGGG

>1679

GGAGGCTCACTGATGCGGTGTCCTGTTGCCTGTGCACGTGGCCAGGCGTGACATCAC  
TGTGCTTATGAGAGAGATGAAGAGCACAGATAACACCTTACTGATGGGGGTCCTGGGG  
CTGGGCTTGTGGGTGTTGGGGGTT

>1680

AGGCTCACTGATGCGGTGTCCTGTTGCCTGTGCACGTGGCCAGGCGTGACATCACTG  
TGCTTATGAGAGAGATGAAGAGCACAGATAACACCTTACTGATGGGGGTCCTGGGGCT  
GGGCTTGTGGGTGTTGGGGGTTCC

>1681

GTGTCCTGTTGCCTGTGCACGTGGCCAGGCGTGACATCACTGTGCTTATGAGAGAGA  
TGAAGAGCACAGATAACACCTTACTGATGGGGGTCCTGGGGCTGGGCTTGTGGGTGTT  
GGGGGTTCCAGAGCTCCTTCCTT

>1682

ATGAAGAGCACAGATAACACCTTACTGATGGGGGTCCTGGGGCTGGGCTTGTGGGTGT  
TGGGGGTTCCAGAGCTCCTTCCCTTTCCTGCCTGTCAGTGCAGGATGCTTCTAAAATGT  
GGAATCAGCAGACATTGTTTTGA

>1683

GAAGAGCACAGATAACACCTTACTGATGGGGGTCCTGGGGCTGGGCTTGTGGGTGTTG  
GGGGTTCAGAGCTCCTTCCCTTTCCTGCCTGTCAGTGCAGGATGCTTCTAAAATGTGG  
ACTCAGCAGACATTGTTTTGAGT

GGGTCCTGGGGCTGGGCTTGTGGGTGTTGGGGGTTCAGAGCTCCTTCCCTTTCCTGC  
CTGTCAGTGCAGGATGCTTCTAAAATGTGGACTCAGCAGACATTGTTTTGAGTGCTTGC  
TACATGTCAGATTCTGTGCTAAG

TGTTGGGGGTTCCAGAGCTCCTTCCCTTTCCTGCCTGTCAGTGCAGGATGCTTCTAAAA  
TGTGGACTCAGCAGACATTGTTTTGAGTGCTTGCTACATGTCAGATTCTGTGCTAAGTG  
CACTCACAGCCAGCATCTCTGT

TGGGGGTTCAGAGCTCCTTCCCTTTCCTGCCTGTCAGTGCAGGATGCTTCTAAAATGT  
GGACTCAGCAGACATTGTTTTGAGTGCTTGCTACATGTCAGATTCTGTGCTAAGTGCAC  
TCACAGCCAGCATCTCTGTAAG

CCTGTCAGTGCAGGATGCTTCTAAAATGTGGACTCAGCAGACATTGTTTTGAGTGCTTG  
CTACATGTCAGATTCTGTGCTAAGTGCCTCACAGCCAGCATCTCTGTAAGACCTCTAG  
CTGTCCTGTAAGGTGGGTATCA

GATGCTTCTAAAATGTGGACTCAGCAGACATTGTTTTGAGTGCTTGCTACATGTCAGAT  
TCTGTGCTAAGTGCCTCACAGCCAGCATCTCTGTAAGACCTCTAGCTGTCCTGTAAGG  
TGGGTATCAGTTTCACATTCTC

AATGTGGACTCAGCAGACATTGTTTTGAGTGCTTGCTACATGTCAGATTCTGTGCTAAG  
TGCATCAGCCAGCATCTCTGTAAGACCTCTAGCTGTCCGTGAAGGTGGGTATCAGT  
TTCACATTCTCAGATGGGCGGA

ACATTGTTTTGAGTGCTTGCTACATGTCAGATTCTGTGCTAAGTGCCTCACAGCCAGC  
ATCTCTGTAAGACCTCTAGCTGTCCTGTAAGGTGGGTATCAGTTTCATTCTCAGATG  
GGCGGAGAGAAGCCCAAGAGGT

TTCTGTGCTAAGTGCCTCACAGCCAGCATCTCTGTAAGACCTCTAGCTGTCTGTAAAG  
GTGGGTATCAGTTTACATTCTCAGATGGGCGGAGAGAAGCCCAAGAGGTTAGTGGAC  
TTTTCTCTAGTAAAGAGTTGTAC

CACTCACAGCCAGCATCTCTGTAAGACCTCTAGCTGTCTGTAAAGGTGGGTATCAGTTT  
CACATTCTCAGATGGGCGGAGAGAAGCCCAAGAGGTTAGTGGACTTTTCTCTAGTAAA  
GAGTTGTACAGGCCGGGCGCAGT

CAGCATCTCTGTAAGACCTCTAGCTGTCTGTAAGGTGGGTATCAGTTTCACATTCTCA  
GATGGGCGGAGAGAAGCCCAAGAGGTTAGTGGACTTTTCTCTAGTAAAGAGTTGTACA  
GGCCGGGCGCAGTGGCTCATGCC

AGGTGGGTATCAGTTTCACATTCTCAGATGGGCGGAGAGAAGCCCAAGAGGTTAGTGG  
ACTTTTCTCTAGTAAAGAGTTGTACAGGCCGGGCGCAGTGGCTCATGCCTGTAATCCCA  
GCACTTTGGGAGGCCGAGGCGGG



>1695

GGTATCAGTTTCACATTCTCAGATGGGCGGAGAGAAGCCCAAGAGGTTAGTGGACTTT  
TCTCTAGTAAAGAGTTGTACAGGCCGGGCGCAGTGGCTCATGCCTGTAATCCCAGCAC  
TTTGGGAGGCCGAGGCGGGCGGAT

>1696

TCACATTCTCAGATGGGCGGAGAGAAGCCCAAGAGGTTAGTGGACTTTTCTCTAGTAA  
AGAGTTGTACAGGCCGGGCGCAGTGGCTCATGCCTGTAATCCCAGCACTTTGGGAGGC  
CGAGGCGGGCGGATCACGAGGTCA

>1697

AGGTTAGTGGACTTTTCTCTAGTAAAGAGTTGTACAGGCCGGGCGCAGTGGCTCATGC  
CTGTAATCCCAGCACTTTGGGAGGCCGAGGCGGGCGGATCACGAGGTCAGGAGATCG  
AGACCATCCTGGCTAACACAGTGAA

>1698

CTTTTCTCTAGTAAAGAGTTGTACAGGCCGGGCGCAGTGGCTCATGCCTGTAATCCCAG  
CACTTTGGGAGGCCGAGGCGGGCGGATCACGAGGTCAGGAGATCGAGACCATCCTGG  
CTAACACAGTGAAACCCCGTCTCT

>1699

TCTAGTAAAGAGTTGTACAGGCCGGGCGCAGTGGCTCATGCCTGTAATCCCAGCACTT  
TGGGAGGCCGAGGCGGGCGGATCACGAGGTCAGGAGATCGAGACCATCCTGGCTAAC  
ACAGTGAAACCCCGTCTCTACTAAA

>1700

ACAGGCCGGGCGCAGTGGCTCATGCCTGTAATCCCAGCACTTTGGGAGGCCGAGGCG  
GGCGGATCACGAGGTCAGGAGATCGAGACCATCCTGGCTAACACAGTGAAACCCCGT  
CTCTACTAAAAATACAAAAAATTAGC

>1701

GTGGCTCATGCCTGTAATCCCAGCACTTTGGGAGGCCGAGGCGGGCGGATCACGAGGT  
CAGGAGATCGAGACCATCCTGGCTAACACAGTGAAACCCCGTCTCTACTAAAAATACA  
AAAAATTAGCCGGGCGTGGTGGGG

>1702

GGTCAGGAGATCGAGACCATCCTGGCTAACACAGTGAAACCCCGTCTCTACTAAAAAT  
ACAAAAAATTAGCCGGGCGTGGTGGGGGGCGCCTGTAGTCCCAGCTACTCGGGAGGC  
TGAGGCAGGAGAATGGCGTGAACCC

>1703

TAACACAGTGAAACCCCGTCTCTACTAAAAATACAAAAAATTAGCCGGGCGTGGTGGG  
GGGCGCCTGTAGTCCCAGCTACTCGGGAGGCTGAGGCAGGAGAATGGCGTGAACCCG  
GGAGGCAGAGCTTGCAGTGAGCCGA

>1704

AGTGAAACCCCGTCTCTACTAAAAATACAAAAAATTAGCCGGGCGTGGTGGGGGGCGC  
CTGTAGTCCCAGCTACTCGGGAGGCTGAGGCAGGAGAATGGCGTGAACCCGGGAGGC  
AGAGCTTGCAGTGAGCCGAGATCAT

>1705

GTCTCTACTAAAAATACAAAAAATTAGCCGGGCGTGGTGGGGGGCGCCTGTAGTCCCA  
GCTACTCGGGAGGCTGAGGCAGGAGAATGGCGTGAACCCGGGAGGCAGAGCTTGCA  
TGAGCCGAGATCATGCCACTACTA

>1706  
ACTAAAAATACAAAAAATTAGCCGGGCGTGGTGGGGGGCGCCTGTAGTCCCAGCTACT  
CGGGAGGCTGAGGCAGGAGAATGGCGTGAACCCGGGAGGCAGAGCTTGCAGTGAGC  
CGAGATCATGCCACTCACTACACTCC

>1707  
CGTGGTGGGGGGCGCCTGTAGTCCCAGCTACTCGGGAGGCTGAGGCAGGAGAATGGC  
GTGAACCCGGGAGGCAGAGCTTGCAGTGAGCCGAGATCATGCCACTCACTACACTCC  
AGCCTGGGCAAAGGAGTGAGACTGTC

>1708  
GCCTGTAGTCCCAGCTACTCGGGAGGCTGAGGCAGGAGAATGGCGTGAACCCGGGAG  
GCAGAGCTTGCAGTGAGCCGAGATCATGCCACTCACTACACTCCAGCCTGGGCAAAG  
GAGTGAGACTGTCTCAAAAAAAAAAAAA

>1709  
GTAGTCCCAGCTACTCGGGAGGCTGAGGCAGGAGAATGGCGTGAACCCGGGAGGCAG  
AGCTTGCAGTGAGCCGAGATCATGCCACTCACTACACTCCAGCCTGGGCAAAGGAGTG  
AGACTGTCTCAAAAAAAAAAAAAAAAAA

>1710  
CCCAGCTACTCGGGAGGCTGAGGCAGGAGAATGGCGTGAACCCGGGAGGCAGAGCTT  
GCAGTGAGCCGAGATCATGCCACTCACTACACTCCAGCCTGGGCAAAGGAGTGAGAC  
TGTCTCAAAAAAAAAAAAAAAAAAAAAA

>1711  
AGGAGAATGGCGTGAACCCGGGAGGCAGAGCTTGCAGTGAGCCGAGATCATGCCACT  
CACTACACTCCAGCCTGGGCAAAGGAGTGAGACTGTCTCAAAAAAAAAAAAAAAAAAAAA  
AAAAGAGTTGTACCAGGATTTATGTTC

>1712  
CGGGAGGCAGAGCTTGCAGTGAGCCGAGATCATGCCACTCACTACACTCCAGCCTGG  
GCAAAGGAGTGAGACTGTCTCAAAAAAAAAAAAAAAAAAAAAAAGAGTTGTACCAGGA  
TTTATGTTTCAGGTCTTCTGGCTCCATG

>1713  
CATGCCACTCACTACACTCCAGCCTGGGCAAAGGAGTGAGACTGTCTCAAAAAAAAAAAAA  
AAAAAAAAAAAAAGAGTTGTACCAGGATTTATGTTTCAGGTCTTCTGGCTCCATGCTCTCT  
GCAGCTGGGTGACCAGGGGGCTCA

>1714  
TGCCACTCACTACACTCCAGCCTGGGCAAAGGAGTGAGACTGTCTCAAAAAAAAAAAAAA  
AAAAAAAAAAAAAGAGTTGTACCAGGATTTATGTTTCAGGTCTTCTGGCTCCATGCTCTCTGC  
AGCTGGGTGACCAGGGGGCTCATG

>1715  
AAAAAAAAAAAAAAAAAAAAAAGAGTTGTACCAGGATTTATGTTTCAGGTCTTCTGGCTCCA  
TGCTCTCTGCAGCTGGGTGACCAGGGGGCTCATGGCTTCACCAGCTCTGGCCTCCTCA  
GTTCTCTGGTGGCTTCTTGCGAG

>1716  
AAAAAAGAGTTGTACCAGGATTTATGTTTCAGGTCTTCTGGCTCCATGCTCTCTGCAGC  
TGGGTGACCAGGGGGCTCATGGCTTCACCAGCTCTGGCCTCCTCAGTTCTCTGGTGG  
CTTCTTGCGAGGAGGAAGGTTAC

>1717

ATTTATGTTTCAGGTCTTCTGGCTCCATGCTCTCTGCAGCTGGGTGACCAGGGGGCTCAT  
GGCTTCACCAGCTCTGGCCTCCTCAGTTCCTCTGGTGGCTTCTTGCGAGGAGGAAGGT  
TACTGCAGAGGGTTCAGCTCTTT

>1718

CTGGGTGACCAGGGGGCTCATGGCTTCACCAGCTCTGGCCTCCTCAGTTCCTCTGGTG  
GCTTCTTGCGAGGAGGAAGGTTACTGCAGAGGGTTCAGCTCTTTAGGGGGCCAGGCC  
GCATGGATCCAAGGACTAGTACGTC

>1719

GGTGACCAGGGGGCTCATGGCTTCACCAGCTCTGGCCTCCTCAGTTCCTCTGGTGGCT  
TCTTGCGAGGAGGAAGGTTACTGCAGAGGGTTCAGCTCTTTAGGGGGCCAGGCCGCAT  
GGATCCAAGGACTAGTACGTCATC

>1720

CACCAGCTCTGGCCTCCTCAGTTCCTCTGGTGGCTTCTTGCGAGGAGGAAGGTTACTG  
CAGAGGGTTCAGCTCTTTAGGGGGCCAGGCCGCATGGATCCAAGGACTAGTACGTCAT  
CTCTTACCAACACAGAGAGATCAG

>1721

CTCAGTTCCTCTGGTGGCTTCTTGCGAGGAGGAAGGTTACTGCAGAGGGTTCAGCTCT  
TTAGGGGGCCAGGCCGCATGGATCCAAGGACTAGTACGTCATCTCTTACCAACACAGA  
GAGATCAGCTTCTAGTGATAGAGG

>1722

GCTTCTTGCGAGGAGGAAGGTTACTGCAGAGGGTTCAGCTCTTTAGGGGGCCAGGCC  
GCATGGATCCAAGGACTAGTACGTCATCTCTTACCAACACAGAGAGATCAGCTTCTAGT  
GATAGAGGCCTTTTATGCTGACTT

>1723

TGCGAGGAGGAAGGTTACTGCAGAGGGTTCAGCTCTTTAGGGGGCCAGGCCGCATGG  
ATCCAAGGACTAGTACGTCATCTCTTACCAACACAGAGAGATCAGCTTCTAGTGATAGA  
GGCCTTTTATGCTGACTTGAAAAA

>1724

GGTTCAGCTCTTTAGGGGGCCAGGCCGCATGGATCCAAGGACTAGTACGTCATCTCTTA  
CCAACACAGAGAGATCAGCTTCTAGTGATAGAGGCCTTTTATGCTGACTTGAAAAACA  
GAAAAAGAGAGAAAAAAGAAACC

>1725

GGGGCCAGGCCGCATGGATCCAAGGACTAGTACGTCATCTCTTACCAACACAGAGAG  
ATCAGCTTCTAGTGATAGAGGCCTTTTATGCTGACTTGAAAAACAGAAAAAGAGAGAA  
AAAAGAAACCCATTTACAAAAATA

>1726

CAGGCCGCATGGATCCAAGGACTAGTACGTCATCTCTTACCAACACAGAGAGATCAGC  
TTCTAGTGATAGAGGCCTTTTATGCTGACTTGAAAAACAGAAAAAGAGAGAAAAAAG  
AAACCCATTTACAAAAATAAAATC

>1727

GTCATCTCTTACCAACACAGAGAGATCAGCTTCTAGTGATAGAGGCCTTTTATGCTGAC  
TTGAAAAACAGAAAAAGAGAGAAAAAAGAAACCCATTTACAAAAATAAAATCCCAT  
GCTGTTAATTTCATGCCAGCATAA

>1728

CAGAGAGATCAGCTTCTAGTGATAGAGGCCTTTTATGCTGACTTGAAAAACAGAAAAA  
GAGAGAAAAAAGAAACCCATTTACAAAAATAAAAAATCCCATGCTGTTAATTTTCATGCC  
AGCATAATCAGAAATTCCCCTTTC

>1729

AACAGAAAAAGAGAGAAAAAAGAAACCCATTTACAAAAATAAAAAATCCCATGCTGTT  
AATTTTCATGCCAGCATAATCAGAAATTCCCCTTTCTACTGTTTCCCCTTAAAAGCCCCCGG  
TGTCTTATTATGCTGGTGCAGT

>1730

AGAGAGAAAAAAGAAACCCATTTACAAAAATAAAAAATCCCATGCTGTTAATTTTCATGC  
CAGCATAATCAGAAATTCCCCTTTCTACTGTTTCCCCTTAAAAGCCCCCGGTGTCCTTATT  
ATGCTGGTGCAGTCTGGAAAAA

>1731

AAAATCCCATGCTGTTAATTTTCATGCCAGCATAATCAGAAATTCCCCTTTCTACTGTTTC  
CCCTTAAAAGCCCCGGTGTCTTATTATGCTGGTGCAGTCTGGAAAACTATGGTTGGG  
TTTTGCCTACGTGAGGCTTAT

>1732

GCATAATCAGAAATTCCCCTTTCTACTGTTTCCCCTTAAAAGCCCCGGTGTCTTATTAT  
GCTGGTGCAGTCTGGAAAACTATGGTTGGGTTTTGCCTACGTGAGGCTTATCTCTGCA  
GCTGCAAGGAGGGGATCCGGT

>1733

TAAAAGCCCCGGTGTCTTATTATGCTGGTGCAGTCTGGAAAACTATGGTTGGGTTTT  
GCCTACGTGAGGCTTATCTCTGCAGCTGCAAGGAGGGGATCCGGTACTTTATTGTCAGC  
ATGGAACTTCCGCTAAATACT

>1734

TCCTTATTATGCTGGTGCAGTCTGGAAAACTATGGTTGGGTTTTGCCTACGTGAGGCT  
TATCTCTGCAGCTGCAAGGAGGGGATCCGGTACTTTATTGTCAGCATGGAACTTCCGC  
TAAATACTTAGAAAAACCTTAA

>1735

TGGTTGGGTTTTGCCTACGTGAGGCTTATCTCTGCAGCTGCAAGGAGGGGATCCGGTA  
CTTTATTGTCAGCATGGAACTTCCGCTAAATACTTAGAAAAACCTTAATTCTAAATTCC  
TAGCTCACTTTCAACTGTGTCC

>1736

TATCTCTGCAGCTGCAAGGAGGGGATCCGGTACTTTATTGTCAGCATGGAACTTCCGC  
TAAATACTTAGAAAAACCTTAATTCTAAATTCCTAGCTCACTTTCAACTGTGTCTCGGG  
ACCTGATTTTCTTCGGTGTGA

>1737

TCCGGTACTTTATTGTCAGCATGGAACTTCCGCTAAATACTTAGAAAAACCTTAATTCT  
AAATTCCTAGCTCACTTTCAACTGTGTCTCGGGACCTGATTTTCTTCGGTGTGAACAG  
ATTGTGTTTCAGCATTGCAGTA

>1738

ACCTTAATTCTAAATTCCTAGCTCACTTTCAACTGTGTCTCGGGACCTGATTTTCTTCG  
GTGTGAACAGATTGTGTTTCAGCATTGCAGTAGAAAGGGTCCAAGTTAGGTAAGAGAAA  
GGACTTCCTGAGACACTGGGGT

>1739

AAATTCCTAGCTCACTTTCAACTGTGTCCTCGGGACCTGATTTTCTTCGGTGTGAACAG  
ATTGTGTTTCAGCATTGCAGTAGAAAGGGTCCAAGTTAGGTAAGAGAAAGGACTTCCTG  
AGACACTGGGGTGTACTGAGAA

>1740

AGCTCACTTTCAACTGTGTCCTCGGGACCTGATTTTCTTCGGTGTGAACAGATTGTGTT  
CAGCATTGCAGTAGAAAGGGTCCAAGTTAGGTAAGAGAAAGGACTTCCTGAGACACT  
GGGGTGTACTGAGAAAGTTGTTA

>1741

GTGTCCTCGGGACCTGATTTTCTTCGGTGTGAACAGATTGTGTTTCAGCATTGCAGTAGA  
AAGGGTCCAAGTTAGGTAAGAGAAAGGACTTCCTGAGACACTGGGGTGTACTGAGA  
AAGTTGTTAGAAGACTGTACACAGA

>1742

GTGTGAACAGATTGTGTTTCAGCATTGCAGTAGAAAGGGTCCAAGTTAGGTAAGAGAAA  
GGACTTCCTGAGACACTGGGGTGTACTGAGAAAGTTGTTAGAAGACTGTACACAGACA  
TTTTGATGAAGGGGGGACATTCTG

>1743

AGCATTGCAGTAGAAAGGGTCCAAGTTAGGTAAGAGAAAGGACTTCCTGAGACACTG  
GGGTGTACTGAGAAAGTTGTTAGAAGACTGTACACAGACATTTTGATGAAGGGGGGAC  
ATTCTGGGCCATTTGAAGTGGTTTT

>1744

TTGCAGTAGAAAGGGTCCAAGTTAGGTAAGAGAAAGGACTTCCTGAGACACTGGGGT  
GTTACTGAGAAAGTTGTTAGAAGACTGTACACAGACATTTTGATGAAGGGGGGACATTC  
TGGGCCATTTGAAGTGGTTTTTAGA

>1745

GTTAGGTAAGAGAAAGGACTTCCTGAGACACTGGGGTGTACTGAGAAAGTTGTTAG  
AAGACTGTACACAGACATTTTGATGAAGGGGGGACATTCTGGGCCATTTGAAGTGGTTT  
TTAGAGTTCTTTCTCTTTAGGGCC

>1746

TACTGAGAAAGTTGTTAGAAGACTGTACACAGACATTTTGATGAAGGGGGGACATTCTG  
GGCCATTTGAAGTGGTTTTTAGAGTTCTTTCTCTTTAGGGCCATTCGGTTCCCCCAGA  
AATAAGAAGAAAAGACATATACA

>1747

GTTGTTAGAAGACTGTACACAGACATTTTGATGAAGGGGGGACATTCTGGGCCATTTGA  
AGTGGTTTTTAGAGTTCTTTCTCTTTAGGGCCATTCGGTTCCCCCAGAAATAAGAAGA  
AAAGACATATACACGCACATAAA

>1748

GGGGACATTCTGGGCCATTTGAAGTGGTTTTTAGAGTTCTTTCTCTTTAGGGCCATTC  
GGTTCCCCCAGAAATAAGAAGAAAAGACATATACACGCACATAAACCACCACCACCAG  
GCTTGCTGAGAACAAGTCAAATG

>1749

TTCTGGGCCATTTGAAGTGGTTTTTAGAGTTCTTTCTCTTTAGGGCCATTCGGTTCCCC  
CAGAAATAAGAAGAAAAGACATATACACGCACATAAACCACCACCACCAGGCTTGCTG  
AGAACAAGTCAAATGTGCCACC

>1750

CATTTGAAGTGGTTTTTAGAGTTCTTTCTCTTTAGGGCCATTTCGGTTCCTCCAGAAATA  
AGAAGAAAAGACATATACACGCACATAAACCACCACCAGGCTTGCTGAGAACA  
GTCAAATGTGCCACCAAACCATC

>1751

TTAGGGCCATTTCGGTTCCTCCAGAAATAAGAAGAAAAGACATATACACGCACATAAAC  
CACCACCACCAGGCTTGCTGAGAACAAGTCAAATGTGCCACCAAACCATCGTCTTAGT  
GGGAGATGGGGTGGCACTGCAGGG

>1752

TCGGTTCCTCCAGAAATAAGAAGAAAAGACATATACACGCACATAAACCACCACCACC  
AGGCTTGCTGAGAACAAGTCAAATGTGCCACCAAACCATCGTCTTAGTGGGAGATGGG  
GTGGCACTGCAGGGGCAGAAAGAC

>1753

CCCCAGAAATAAGAAGAAAAGACATATACACGCACATAAACCACCACCACCAGGCTT  
GCTGAGAACAAGTCAAATGTGCCACCAAACCATCGTCTTAGTGGGAGATGGGGTGGC  
ACTGCAGGGGCAGAAAGACTGACGT

>1754

CACGCACATAAACCACCACCACCAGGCTTGCTGAGAACAAGTCAAATGTGCCACCAA  
ACCATCGTCTTAGTGGGAGATGGGGTGGCACTGCAGGGGCAGAAAGACTGACGTCTG  
ATGGAATTGGGTTTGAATACTAGTGC

>1755

AGGCTTGCTGAGAACAAGTCAAATGTGCCACCAAACCATCGTCTTAGTGGGAGATGGG  
GTGGCACTGCAGGGGCAGAAAGACTGACGTCTGATGGACTTGGGTTTGAATACTAGTG  
CTCCATGGTGAATTTGGGCAAATG

>1756

GCTGAGAACAAGTCAAATGTGCCACCAAACCATCGTCTTAGTGGGAGATGGGGTGGC  
ACTGCAGGGGCAGAAAGACTGACGTCTGATGGACTTGGGTTTGAATACTAGTGCTCCA  
TGGTGAATTTGGGCAAATGACTTCA

>1757

AGAACAAGTCAAATGTGCCACCAAACCATCGTCTTAGTGGGAGATGGGGTGGCACTGC  
AGGGGCAGAAAGACTGACGTCTGATGGACTTGGGTTTGAATACTAGTGCTCCATGGTG  
AATTTGGGCAAATGACTTCACCTC

>1758

TAGTGGGAGATGGGGTGGCACTGCAGGGGCAGAAAGACTGACGTCTGATGGACTTGG  
GTTTGAATACTAGTGCTCCATGGTGAATTTGGGCAAATGACTTCACCTCTGTGAAGCAG  
CAGTATCCTCTTCTGTGAAGTGAG

>1759

TCTGATGGACTTGGGTTTGAATACTAGTGCTCCATGGTGAATTTGGGCAAATGACTTCA  
CCTCTGTGAAGCAGCAGTATCCTCTTCTGTGAAGTGAGGTTAGCCCCTACCTCTCAATG  
TGGTTTTTAAAGTATGTTAATG

>1760

GATGGACTTGGGTTTGAATACTAGTGCTCCATGGTGAATTTGGGCAAATGACTTCACCT  
CTGTGAAGCAGCAGTATCCTCTTCTGTGAAGTGAGGTTAGCCCCTACCTCTCAATGTGG  
TTTTTAAAGTATGTTAATGAGA

>1761

CATGGTGAATTTGGGCAAATGACTTCACCTCTGTGAAGCAGCAGTATCCTCTTCTGTGA  
AGTGAGGTTAGCCCCTACCTCTCAATGTGGTTTTTAAAGTATGTTAATGAGATCACTTGT  
AACCTAAAGCACACAGAGTGT

>1762

CTCTGTGAAGCAGCAGTATCCTCTTCTGTGAAGTGAGGTTAGCCCCTACCTCTCAATGT  
GGTTTTTAAAGTATGTTAATGAGATCACTTGTAACCTAAAGCACACAGAGTGTGAGGCC  
ACCTCCCTACTTCCTGCTTCTC

>1763

GCAGTATCCTCTTCTGTGAAGTGAGGTTAGCCCCTACCTCTCAATGTGGTTTTTAAAGTA  
TGTTAATGAGATCACTTGTAACCTAAAGCACACAGAGTGTGAGGCCACCTCCCTACTTC  
CTGCTTCTCTCATGACCCAG

>1764

GTTAGCCCCTACCTCTCAATGTGGTTTTTAAAGTATGTTAATGAGATCACTTGTAACCTA  
AAGCACACAGAGTGTGAGGCCACCTCCCTACTTCCTGCTTCTCTCATGACCCAGCCT  
GACAAGGGAGCCGCTGAGCCCC

>1765

TAGCCCCTACCTCTCAATGTGGTTTTTAAAGTATGTTAATGAGATCACTTGTAACCTAAA  
GCACACAGAGTGTGAGGCCACCTCCCTACTTCCTGCTTCTCTCATGACCCAGCCTGA  
CAAGGGAGCCGCTGAGCCCCCT

>1766

CTACCTCTCAATGTGGTTTTTAAAGTATGTTAATGAGATCACTTGTAACCTAAAGCACAC  
AGAGTGTGAGGCCACCTCCCTACTTCCTGCTTCTCTCATGACCCAGCCTGACAAGGG  
AGCCGCTGAGCCCCCTGCCACC

>1767

ATCACTTGTAACCTAAAGCACACAGAGTGTGAGGCCACCTCCCTACTTCCTGCTTCTCT  
CATGACCCAGCCTGACAAGGGAGCCGCTGAGCCCCCTGCCACCCTACCCGGCGTT  
GTGCTCTAAGTGGATTAGCTCAGC

>1768

TAAAGCACACAGAGTGTGAGGCCACCTCCCTACTTCCTGCTTCTCTCATGACCCAGC  
CTGACAAGGGAGCCGCTGAGCCCCCTGCCACCCTACCCGGCGTTGTGCTCTAAGTGG  
ATTAGCTCAGCGTTGTGATCTTAA

>1769

ACAGAGTGTGAGGCCACCTCCCTACTTCCTGCTTCTCTCATGACCCAGCCTGACAAG  
GGAGCCGCTGAGCCCCCTGCCACCCTACCCGGCGTTGTGCTCTAAGTGGATTAGCTC  
AGCGTTGTGATCTTAATGCCATTA

>1770

TCTCATGACCCAGCCTGACAAGGGAGCCGCTGAGCCCCCTGCCACCCTACCCGGCG  
TTGTGCTCTAAGTGGATTAGCTCAGCGTTGTGATCTTAATGCCATTAGGCCTGTTGGCA  
CGGCTCTCCTTGCCATAGTGAGA

>1771

GCCTGACAAGGGAGCCGCTGAGCCCCCTGCCACCCTACCCGGCGTTGTGCTCTAAGT  
GGATTAGCTCAGCGTTGTGATCTTAATGCCATTAGGCCTGTTGGCACGGCTCTCCTTGC  
CATAGTGAGAAGCAGATGTGGCC

>1772

CCCCTGCCACCCTCACCCGGCGTTGTGCTCTAAGTGGATTAGCTCAGCGTTGTGATCTT  
AATGCCATTAGGCCTGTTGGCACGGCTCTCCTTGCCATAGTGAGAAGCAGATGTGGCC  
GACCATAATGGCCCTTAGCGTGA

>1773

CTAAGTGGATTAGCTCAGCGTTGTGATCTTAATGCCATTAGGCCTGTTGGCACGGCTCT  
CCTTGCCATAGTGAGAAGCAGATGTGGCCGACCATAATGGCCCTTAGCGTGATCCATCG  
GGCCACAGTGCTGGGGCAACC

>1774

ATTAGGCCTGTTGGCACGGCTCTCCTTGCCATAGTGAGAAGCAGATGTGGCCGACCATA  
ATGGCCCTTAGCGTGATCCATCGGGCCACAGTGCTGGGGCAACCATTATTAGTGTTAA  
TTTGGGGGAGCTTTTTATGGTA

>1775

CTCCTTGCCATAGTGAGAAGCAGATGTGGCCGACCATAATGGCCCTTAGCGTGATCCAT  
CGGGCCACAGTGCTGGGGCAACCATTATTAGTGTTAATTTGGGGGAGCTTTTTATGGT  
AGCTGGGGGAAATGTGGAGGGA

>1776

AGATGTGGCCGACCATAATGGCCCTTAGCGTGATCCATCGGGCCACAGTGCTGGGGC  
AACCATTATTAGTGTTAATTTGGGGGAGCTTTTTATGGTAGCTGGGGGAAATGTGGAGG  
GATTGTTGGAAATTTATTTAAGC

>1777

AATGGCCCTTAGCGTGATCCATCGGGCCACAGTGCTGGGGCAACCATTATTAGTGTTA  
ATTTGGGGGAGCTTTTTATGGTAGCTGGGGGAAATGTGGAGGGATTGTTGGAAATTTAT  
TTAAGCTGTTTCAGCAGGTTAGG

>1778

GTGATCCATCGGGCCACAGTGCTGGGGCAACCATTATTAGTGTTAATTTGGGGGAGCT  
TTTTATGGTAGCTGGGGGAAATGTGGAGGGATTGTTGGAAATTTATTTAAGCTGTTTCAG  
CAGGTTAGGTGCTGCTGGGGTC

>1779

GTGTTAATTTGGGGGAGCTTTTTATGGTAGCTGGGGGAAATGTGGAGGGATTGTTGGA  
AATTTATTTAAGCTGTTTCAGCAGGTTAGGTGCTGCTGGGGTCTACTATGGCAAACCCCT  
CAGCTCCCCCAACCCATCTCTTT

>1780

TTGGGGGAGCTTTTTATGGTAGCTGGGGGAAATGTGGAGGGATTGTTGGAAATTTATTT  
AAGCTGTTTCAGCAGGTTAGGTGCTGCTGGGGTCTACTATGGCAAACCCCTCAGCTCCC  
CCAACCCATCTCTTTAAGGAACG

>1781

TTGTTGGAAATTTATTTAAGCTGTTTCAGCAGGTTAGGTGCTGCTGGGGTCTACTATGGC  
AAAACCCCTCAGCTCCCCCAACCCATCTCTTTAAGGAACGTCCCTCCCCAACACCGAAG  
CCCAGGCCTGATTACTTCCAGAG

>1782

TTCAGCAGGTTAGGTGCTGCTGGGGTCTACTATGGCAAACCCCTCAGCTCCCCCAACC  
CATCTCTTTAAGGAACGTCCCTCCCCAACACCGAAGCCAGGCCTGATTACTTCCAGA  
GTTGGAGAGACAACCTTAGCAGGCT



>1783

GTCTACTATGGCAAAACCCCTCAGCTCCCCCAACCCATCTCTTTAAGGAACGTCCCTCCC  
CAACACCGAAGCCCAGGCCTGATTACTTCCAGAGTTGGAGAGACAACCTTAGCAGGCT  
CTTGTTTCTTGCCGATGTACCTTA

>1784

AGCTCCCCCAACCCATCTCTTTAAGGAACGTCCCTCCCCAACACCGAAGCCCAGGCCT  
GATTACTTCCAGAGTTGGAGAGACAACCTTAGCAGGCTCTTGTTTCTTGCCGATGTACCT  
TATTAGTAGCACCTGGCATCATA

>1785

CTCCCCCAACCCATCTCTTTAAGGAACGTCCCTCCCCAACACCGAAGCCCAGGCCTGA  
TTACTTCCAGAGTTGGAGAGACAACCTTAGCAGGCTCTTGTTTCTTGCCGATGTACCTTA  
TTAGTAGCACCTGGCATCATAAC

>1786

TTTAAGGAACGTCCCTCCCCAACACCGAAGCCCAGGCCTGATTACTTCCAGAGTTGGA  
GAGACAACCTTAGCAGGCTCTTGTTTCTTGCCGATGTACCTTATTAGTAGCACCTGGCAT  
CATAACCCACTAATGGGAACCAG

>1787

GGCCTGATTACTTCCAGAGTTGGAGAGACAACCTTAGCAGGCTCTTGTTTCTTGCCGATG  
TACCTTATTAGTAGCACCTGGCATCATAACCCACTAATGGGAACCAGTGCTCTCCTCCT  
GCGTGGCCAGTGACAAGTAGCC

>1788

CTGATTACTTCCAGAGTTGGAGAGACAACCTTAGCAGGCTCTTGTTTCTTGCCGATGTAC  
CTTATTAGTAGCACCTGGCATCATAACCCACTAATGGGAACCAGTGCTCTCCTCCTGCG  
TGGCCAGTGACAAGTAGCCCTG

>1789

CAGGCTCTTGTTTCTTGCCGATGTACCTTATTAGTAGCACCTGGCATCATAACCCACTAA  
TGGAACCAGTGCTCTCCTCCTGCGTGGCCAGTGACAAGTAGCCCTGTCAGCCGGAGC  
TCGCCGTGCGAGGAAGTTCCTA

>1790

GTACCTTATTAGTAGCACCTGGCATCATAACCCACTAATGGGAACCAGTGCTCTCCTCC  
TGCGTGGCCAGTGACAAGTAGCCCTGTCAGCCGGAGCTCGCCGTGCGAGGAAGTTCC  
TATTAGCTTTATGGTCAGGAGAAC

>1791

ATTAGTAGCACCTGGCATCATAACCCACTAATGGGAACCAGTGCTCTCCTCCTGCGTGG  
CCAGTGACAAGTAGCCCTGTCAGCCGGAGCTCGCCGTGCGAGGAAGTTCCTATTAGCT  
TTATGGTCAGGAGAACTTGCCT

>1792

TGGCATCATAACCCACTAATGGGAACCAGTGCTCTCCTCCTGCGTGGCCAGTGACAAG  
TAGCCCTGTCAGCCGGAGCTCGCCGTGCGAGGAAGTTCCTATTAGCTTTATGGTCAGG  
AGAACTTGTCTGTTCAGGAAATG

>1793

TGGAACCAGTGCTCTCCTCCTGCGTGGCCAGTGACAAGTAGCCCTGTCAGCCGGAGC  
TCGCCGTGCGAGGAAGTTCCTATTAGCTTTATGGTCAGGAGAACTTGTCTGTTCAGGA  
AATGAATGTTGCCGCTAAAGGTC

>1794

GGCCAGTGACAAGTAGCCCTGTCAGCCGGAGCTCGCCGTGCGAGGAAGTTCCTATTAG  
CTTTATGGTCAGGAGAACTTGTCTGTTCAGGAAATGAATGTTGCCGCTAAAGGTCCG  
CGGCCCTGACCCTGGCGGCATAAC

>1795

CAGTGACAAGTAGCCCTGTCAGCCGGAGCTCGCCGTGCGAGGAAGTTCCTATTAGCTT  
TATGGTCAGGAGAACTTGTCTGTTCAGGAAATGAATGTTGCCGCTAAAGGTCCGCGG  
CCCTGACCCTGGCGGCATAACCTG

>1796

TGTCAGCCGGAGCTCGCCGTGCGAGGAAGTTCCTATTAGCTTTATGGTCAGGAGAACT  
TGTCTGTTCAGGAAATGAATGTTGCCGCTAAAGGTCCGCGGCCCTGACCCTGGCGGC  
ATAACCTGTGCGGGCCGGGGAGAC

>1797

GAGGAAGTTCCTATTAGCTTTATGGTCAGGAGAACTTGTCTGTTCAGGAAATGAATGT  
TGCCGCTAAAGGTCCGCGGCCCTGACCCTGGCGGCATAACCTGTGCGGGCCGGGGAG  
ACCCTGTGCAGGATGCTTGGGATT

>1798

AGGAAATGAATGTTGCCGCTAAAGGTCCGCGGCCCTGACCCTGGCGGCATAACCTGTG  
CGGGCCGGGGAGACCCTGTGCAGGATGCTTGGGATTTAGCCCCCTCTCTGGTTCTTGT  
CATATGTAAAGAGGGAATCATTGT

>1799

GTTGCCGCTAAAGGTCCGCGGCCCTGACCCTGGCGGCATAACCTGTGCGGGCCGGGG  
AGACCCTGTGCAGGATGCTTGGGATTTAGCCCCCTCTCTGGTTCTTGTGCATATGTAAAG  
AGGGAATCATTGTGGTATGTTGCA

>1800

GCGGCCCTGACCCTGGCGGCATAACCTGTGCGGGCCGGGGAGACCCTGTGCAGGATG  
CTTGGGATTTAGCCCCCTCTCTGGTTCTTGTGCATATGTAAAGAGGGAATCATTGTGGTAT  
GTTGCAGCCTTGAACCTTTTGATT

>1801

GCGGGCCGGGGAGACCCTGTGCAGGATGCTTGGGATTTAGCCCCCTCTCTGGTTCTTG  
TCATATGTAAAGAGGGAATCATTGTGGTATGTTGCAGCCTTGAACCTTTTGATTATGCAG  
TGAGGGCGACTTAACCGTTTCC

>1802

ATGCTTGGGATTTAGCCCCCTCTCTGGTTCTTGTGCATATGTAAAGAGGGAATCATTGTG  
GTATGTTGCAGCCTTGAACCTTTGATTTATGCAGTGAGGGCGACTTAACCGTTTCCATG  
CCTGGACGGCTGTGCAGTGACA

>1803

CTGGTTCTTGTGCATATGTAAAGAGGGAATCATTGTGGTATGTTGCAGCCTTGAACCTTTG  
ATTTATGCAGTGAGGGCGACTTAACCGTTTCCATGCCTGGACGGCTGTGCAGTGACAG  
AGCCGTGTTGTGAGCGTATGTG

>1804

TTCTTGTGCATATGTAAAGAGGGAATCATTGTGGTATGTTGCAGCCTTGAACCTTTGATTT  
ATGCAGTGAGGGCGACTTAACCGTTTCCATGCCTGGACGGCTGTGCAGTGACAGAGCC  
GTGTTGTGAGCGTATGTGCCTA

>1805

TGCAGCCTTGAACTTTTGATTTATGCAGTGAGGGCGACTTAACCGTTTCCATGCCTGGA  
CGGCTGTGCAGTGACAGAGCCGTGTTGTGAGCGTATGTGCCTAGGTACATGTGTGTGT  
GGGGTGGTCAAGGGGAAGGAGAG

>1806

CTTGAACTTTTGATTTATGCAGTGAGGGCGACTTAACCGTTTCCATGCCTGGACGGCTG  
TGCAGTGACAGAGCCGTGTTGTGAGCGTATGTGCCTAGGTACATGTGTGTGTGGGGTG  
GTCAAGGGGAAGGAGAGACCCCC

>1807

TTATGCAGTGAGGGCGACTTAACCGTTTCCATGCCTGGACGGCTGTGCAGTGACAGAG  
CCGTGTTGTGAGCGTATGTGCCTAGGTACATGTGTGTGTGGGGTGGTCAAGGGGAAGG  
AGAGACCCCCACGTGCTAGCAGGG

>1808

GCGACTTAACCGTTTCCATGCCTGGACGGCTGTGCAGTGACAGAGCCGTGTTGTGAGC  
GTATGTGCCTAGGTACATGTGTGTGTGGGGTGGTCAAGGGGAAGGAGAGACCCCCACG  
TGCTAGCAGGGGCTGTTGCTGGGA

>1809

CGGCTGTGCAGTGACAGAGCCGTGTTGTGAGCGTATGTGCCTAGGTACATGTGTGTGT  
GGGGTGGTCAAGGGGAAGGAGAGACCCCCACGTGCTAGCAGGGGCTGTTGCTGGGA  
GCGGGTGGATTTCATGGGAGGATTCC

>1810

TGCAGTGACAGAGCCGTGTTGTGAGCGTATGTGCCTAGGTACATGTGTGTGTGGGGTG  
GTCAAGGGGAAGGAGAGACCCCCACGTGCTAGCAGGGGCTGTTGCTGGGAGCGGGTG  
GATTCATGGGAGGATTCTTTTCT

>1811

AGTGACAGAGCCGTGTTGTGAGCGTATGTGCCTAGGTACATGTGTGTGTGGGGTGGTC  
AAGGGGAAGGAGAGACCCCCACGTGCTAGCAGGGGCTGTTGCTGGGAGCGGGTGGAT  
TTCATGGGAGGATTCTTTTCTTTT

>1812

GTGAGCGTATGTGCCTAGGTACATGTGTGTGTGGGGTGGTCAAGGGGAAGGAGAGAC  
CCCCACGTGCTAGCAGGGGCTGTTGCTGGGAGCGGGTGGATTTCATGGGAGGATTCT  
TTTCTTTTTTCTTTTCTTGCAATC

>1813

GTCAAGGGGAAGGAGAGACCCCCACGTGCTAGCAGGGGCTGTTGCTGGGAGCGGGTG  
GATTCATGGGAGGATTCTTTTCTTTTTCTTTTCTTGCAATCTTGCAGCATCTAAATT  
TCCTGCGATTGTTGGCTGCAAA

>1814

CTGTTGCTGGGAGCGGGTGGATTTCATGGGAGGATTCTTTTCTTTTTCTTTTCTTGC  
ATTCTTGCAGCATCTAAATTTCTGCGATTGTTGGCTGCAAAGTGGTAAGAAGCTGGAG  
AGCATTGTGTCTGGAATTGAA

>1815

ATTCCTTTTCTTTTTCTTTTTCTTGCAATCTTGCAGCATCTAAATTTCTGCGATTGTTG  
GCTGCAAAGTGGTAAGAAGCTGGAGAGCATTGTGTCTGGAATTGAACCTGGGTTCGAA  
TTAATCTTCTGTCTCTTAGAG

>1816

TTCTTTTTTCTTTTCTTGCATTCTTGCAGCATCTAAATTCCTGCGATTGTTGGCTGCAA  
AGTGGTAAGAAGCTGGAGAGCATTGTGTCTGGAATTGAACCTGGGTTCGAATTAATCT  
TCTGTCTCTTAGAGGCTGTGT

>1817

AGTGGTAAGAAGCTGGAGAGCATTGTGTCTGGAATTGAACCTGGGTTCGAATTAATCT  
TCTGTCTCTTAGAGGCTGTGTGACCGTGGCAAGATTCCTCACCCTCACTTCCTCATCT  
GTGAGATGAAGTTAATAACTTCT

>1818

TGGTAAGAAGCTGGAGAGCATTGTGTCTGGAATTGAACCTGGGTTCGAATTAATCTTCT  
GTCTCTTAGAGGCTGTGTGACCGTGGCAAGATTCCTCACCCTCACTTCCTCATCTGTG  
AGATGAAGTTAATAACTTCTGA

>1819

TAATCTTCTGTCTCTTAGAGGCTGTGTGACCGTGGCAAGATTCCTCACCCTCACTTCC  
TCATCTGTGAGATGAAGTTAATAACTTCTGATTCATACTGGTGGTAGAGCAGTGTTGTTA  
AGTAGGTGATGTATAGAGAAT

>1820

TCTGTCTCTTAGAGGCTGTGTGACCGTGGCAAGATTCCTCACCCTCACTTCCTCATCT  
GTGAGATGAAGTTAATAACTTCTGATTCATACTGGTGGTAGAGCAGTGTTGTTAAGTAG  
GTGATGTATAGAGAATACATGG

>1821

AAGATTCCTCACCCTCACTTCCTCATCTGTGAGATGAAGTTAATAACTTCTGATTCATA  
CTGGTGGTAGAGCAGTGTTGTTAAGTAGGTGATGTATAGAGAATACATGGCCCAGCGTC  
CGGCCAGTGGTGTGGCCTCAG

>1822

TCACTTCCTCATCTGTGAGATGAAGTTAATAACTTCTGATTCATACTGGTGGTAGAGCA  
GTGTTGTTAAGTAGGTGATGTATAGAGAATACATGGCCCAGCGTCCGGCCAGTGGTGTG  
GCCTCAGGTTGTATACTTGAAA

>1823

CTTCCTCATCTGTGAGATGAAGTTAATAACTTCTGATTCATACTGGTGGTAGAGCAGTG  
TTGTTAAGTAGGTGATGTATAGAGAATACATGGCCCAGCGTCCGGCCAGTGGTGTGGCC  
TCAGGTTGTATACTTGAAAGGA

>1824

GTGAGATGAAGTTAATAACTTCTGATTCATACTGGTGGTAGAGCAGTGTTGTTAAGTAG  
GTGATGTATAGAGAATACATGGCCCAGCGTCCGGCCAGTGGTGTGGCCTCAGGTTGTAT  
ACTTGAAAGGATGTGTATACTT

>1825

CATACTGGTGGTAGAGCAGTGTTGTTAAGTAGGTGATGTATAGAGAATACATGGCCCAG  
CGTCCGGCCAGTGGTGTGGCCTCAGGTTGTATACTTGAAAGGATGTGTATACTTCAGTA  
TTTTTCCATTGTAAAATTAAG

>1826

AGCAGTGTTGTTAAGTAGGTGATGTATAGAGAATACATGGCCCAGCGTCCGGCCAGTG  
GTGTGGCCTCAGGTTGTATACTTGAAAGGATGTGTATACTTCAGTATTTTTTCCATTGTA  
AAATTAAGGGTTTTTTTTCTTT

>1827

AGGTGATGTATAGAGAATACATGGCCCAGCGTCCGGCCAGTGGTGTGGCCTCAGGTTG  
TATACTTGAAAGGATGTGTATACTTCAGTATTTTTTCCATTGTAAAATTAAGGGTTTTTTT  
TCTTTTTTTCTTGAGACAGAG

>1828

ATACATGGCCCAGCGTCCGGCCAGTGGTGTGGCCTCAGGTTGTATACTTGAAAGGATGT  
GTATACTTCAGTATTTTTTCCATTGTAAAATTAAGGGTTTTTTTTCTTTTTTTCTTGAGAC  
AGAGTCCTACTTTGTTGCCC

>1829

TGGTGTGGCCTCAGGTTGTATACTTGAAAGGATGTGTATACTTCAGTATTTTTTCCATTG  
TAAAATTAAGGGTTTTTTTTCTTTTTTTCTTGAGACAGAGTCCTACTTTGTTGCCCAGGC  
TTGAGTGCAGTGGCGCGATC

>1830

TGAAAGGATGTGTATACTTCAGTATTTTTTCCATTGTAAAATTAAGGGTTTTTTTTCTTTT  
TTTCTTGAGACAGAGTCCTACTTTGTTGCCCAGGCTTGAGTGCAGTGGCGCGATCTCA  
GCTCACTGCAACTTCCGCCTC

>1831

AGGATGTGTATACTTCAGTATTTTTTCCATTGTAAAATTAAGGGTTTTTTTTCTTTTTTCT  
TTGAGACAGAGTCCTACTTTGTTGCCCAGGCTTGAGTGCAGTGGCGCGATCTCAGCTC  
ACTGCAACTTCCGCCTCCTGG

>1832

CATTGTAAAATTAAGGGTTTTTTTTCTTTTTTTCTTGAGACAGAGTCCTACTTTGTTGCC  
CAGGCTTGAGTGCAGTGGCGCGATCTCAGCTCACTGCAACTTCCGCCTCCTGGGTCCA  
AGTGATTCTCGTGCCTCAGCCT

>1833

TTTTTCTTTTTTTCTTGAGACAGAGTCCTACTTTGTTGCCCAGGCTTGAGTGCAGTGG  
CGCGATCTCAGCTCACTGCAACTTCCGCCTCCTGGGTCCAAGTGATTCTCGTGCCTCAG  
CCTCCCAAGTACCTGGGACCAC

>1834

CTTTGTTGCCCAGGCTTGAGTGCAGTGGCGCGATCTCAGCTCACTGCAACTTCCGCCT  
CCTGGGTCCAAGTGATTCTCGTGCCTCAGCCTCCCAAGTACCTGGGACCACAGGGGTG  
CACCACCACACCTGGCTAATTTTT

>1835

GAGTGCAGTGGCGCGATCTCAGCTCACTGCAACTTCCGCCTCCTGGGTCCAAGTGATT  
CTCGTGCCTCAGCCTCCCAAGTACCTGGGACCACAGGGGTGCACCACCACACCTGGCT  
AATTTTTGTATATATATATATATA

>1836

GGCGCGATCTCAGCTCACTGCAACTTCCGCCTCCTGGGTCCAAGTGATTCTCGTGCCTC  
AGCCTCCCAAGTACCTGGGACCACAGGGGTGCACCACCACACCTGGCTAATTTTTGTA  
TATATATATATATATATATTTAG

>1837

CACTGCAACTTCCGCCTCCTGGGTCCAAGTGATTCTCGTGCCTCAGCCTCCCAAGTACC  
TGGGACCACAGGGGTGCACCACCACACCTGGCTAATTTTTGTATATATATATATATATA  
TTTAGTAGAGATGGGGTTTC

>1838  
TACCTGGGACCACAGGGGTGCACCACCACACCTGGCTAATTTTTGTATATATATATATATA  
TATATTTAGTAGAGATGGGGTTTCGCCATGTTGGCCAGGCTGGTCTTGAACCTCCCGACC  
TCAGGTGATCTGCCTGTCTC

>1839  
CTGGGACCACAGGGGTGCACCACCACACCTGGCTAATTTTTGTATATATATATATATATAT  
ATTTAGTAGAGATGGGGTTTCGCCATGTTGGCCAGGCTGGTCTTGAACCTCCCGACCTCA  
GGTGATCTGCCTGTCTCAGC

>1840  
ACCTGGCTAATTTTTGTATATATATATATATATATATTTAGTAGAGATGGGGTTTCGCCATG  
TTGGCCAGGCTGGTCTTGAACCTCCCGACCTCAGGTGATCTGCCTGTCTCAGCCTCCTAA  
AGTGCTGGGATTATAGGTG

>1841  
ATATATATATATTTAGTAGAGATGGGGTTTCGCCATGTTGGCCAGGCTGGTCTTGAACCTC  
CCGACCTCAGGTGATCTGCCTGTCTCAGCCTCCTAAAGTGCTGGGATTATAGGTGTGAG  
CCTGCGCCTGGCCTAAGTT

>1842  
GAGATGGGGTTTCGCCATGTTGGCCAGGCTGGTCTTGAACCTCCCGACCTCAGGTGATC  
TGCCTGTCTCAGCCTCCTAAAGTGCTGGGATTATAGGTGTGAGCCACTGCGCCTGGCCT  
AAGTTTTTAAAAATTAAAAAGAA

>1843  
CAGGCTGGTCTTGAACCTCCCGACCTCAGGTGATCTGCCTGTCTCAGCCTCCTAAAGTG  
CTGGGATTATAGGTGTGAGCCACTGCGCCTGGCCTAAGTTTTTAAAAATTAAAAAGAAT  
GGCATAGTGCTTTTTTGCTCTTT

>1844  
GTCTTGAACCTCCCGACCTCAGGTGATCTGCCTGTCTCAGCCTCCTAAAGTGCTGGGATT  
ATAGGTGTGAGCCACTGCGCCTGGCCTAAGTTTTTAAAAATTAAAAAGAATGGCATAGT  
GCTTTTTTGCTCTTTAACAGAT

>1845  
AGGTGATCTGCCTGTCTCAGCCTCCTAAAGTGCTGGGATTATAGGTGTGAGCCACTGCG  
CCTGGCCTAAGTTTTTAAAAATTAAAAAGAATGGCATAGTGCTTTTTTGCTCTTTAACA  
GATCAAGACCAAAAGTTTTCCC

>1846  
AGCCTCCTAAAGTGCTGGGATTATAGGTGTGAGCCACTGCGCCTGGCCTAAGTTTTTAA  
AAATTAAAAAGAATGGCATAGTGCTTTTTTGCTCTTTAACAGATCAAGACCAAAAGTTT  
TCCCCCATCATAGCCCAAAGT

>1847  
AGCCACTGCGCCTGGCCTAAGTTTTTAAAAATTAAAAAGAATGGCATAGTGCTTTTTTG  
CTCTTTAACAGATCAAGACCAAAAGTTTTCCCCCATCATAGCCCAAAGTCCTAAAGA  
AAGGCTACTTAAGTTGTTTCGTTT

>1848  
TGCGCCTGGCCTAAGTTTTTAAAAATTAAAAAGAATGGCATAGTGCTTTTTTGCTCTTTA  
ACAGATCAAGACCAAAAGTTTTCCCCCATCATAGCCCAAAGTCCTAAAGAAAGGCTA  
CTTAAGTTGTTTCGTTTTCTTTT

>1849

TTAAAAAGAATGGCATAGTGCTTTTTTGCTCTTTAACAGATCAAGACCAAAAGTTTTCC  
CCCCATCATAGCCCAAAGTCCTAAAGAAAGGCTACTTAAGTTGTTTCGTTTTCTTTTGT  
TCTCCCATGAGTAATGTTTCTA

>1850

GCTTTTTTGCTCTTTAACAGATCAAGACCAAAAGTTTTCCCCCATCATAGCCCAAAGT  
CCTAAAGAAAGGCTACTTAAGTTGTTTCGTTTTCTTTTGTCTCTCCCATGAGTAATGTTT  
TAAGTGTGATTTTTGCAGAGA

>1851

TCTTTAACAGATCAAGACCAAAAGTTTTCCCCCATCATAGCCCAAAGTCCTAAAGAA  
AGGCTACTTAAGTTGTTTCGTTTTCTTTTGTCTCTCCCATGAGTAATGTTTCTAAGTGTGA  
TTTTTGCAGAGAACAGCAGTGT

>1852

CCCCATCATAGCCCAAAGTCCTAAAGAAAGGCTACTTAAGTTGTTTCGTTTTCTTTTGT  
TCTCCCATGAGTAATGTTTCTAAGTGTGATTTTTGCAGAGAACAGCAGTGTCTGACCTC  
ATTCTTGAGGGGAACTTTTCTG

>1853

CAAAGTCCTAAAGAAAGGCTACTTAAGTTGTTTCGTTTTCTTTTGTCTCTCCCATGAGTA  
ATGTTTCTAAGTGTGATTTTTGCAGAGAACAGCAGTGTCTGACCTCATTCTTGAGGGGA  
ACTTTTCTGCCTGCCTCTTCTT

>1854

AAGGCTACTTAAGTTGTTTCGTTTTCTTTTGTCTCTCCCATGAGTAATGTTTCTAAGTGTG  
ATTTTTGCAGAGAACAGCAGTGTCTGACCTCATTCTTGAGGGGAACTTTTCTGCCTGCC  
TCTTCTTGAGAAAAAATGTTT

>1855

GGCTACTTAAGTTGTTTCGTTTTCTTTTGTCTCTCCCATGAGTAATGTTTCTAAGTGTGAT  
TTTTGCAGAGAACAGCAGTGTCTGACCTCATTCTTGAGGGGAACTTTTCTGCCTGCCT  
CTTCTTGAGAAAAAATGTTTGT

>1856

TTTCTCCCATGAGTAATGTTTCTAAGTGTGATTTTTGCAGAGAACAGCAGTGTCTGACC  
TCATTCTTGAGGGGAACTTTTCTGCCTGCCTCTTCTTGAGAAAAAATGTTTGTGAGTTG  
TCTGGCAAATGGATGCGTTACT

>1857

GATTTTTGCAGAGAACAGCAGTGTCTGACCTCATTCTTGAGGGGAACTTTTCTGCCTG  
CCTCTTCTTGAGAAAAAATGTTTGTGAGTTGTCTGGCAAATGGATGCGTTACTTTTGCT  
GCTGTTGCTGCCGCTGCCGTTTT

>1858

AGCAGTGTCTGACCTCATTCTTGAGGGGAACTTTTCTGCCTGCCTCTTCTTGAGAAAA  
AATGTTTGTGAGTTGTCTGGCAAATGGATGCGTTACTTTTGCTGCTGTTGCTGCCGCTG  
CCGTTTTAAAGGCCCTGGTGAC

>1859

AATGTTTGTGAGTTGTCTGGCAAATGGATGCGTTACTTTTGCTGCTGTTGCTGCCGCTG  
CCGTTTTAAAGGCCCTGGTGACAAAGGAGTGAAGTGCACCTTCGGGGAAAGCATGC  
CGGAATCTGGCCCAGAAAAGAGGG

>1860

CTGGCAAATGGATGCGTTACTTTTGGCTGCTGTTGCTGCCGCTGCCGTTTTAAAGGCCCC  
TGGTGACAAAGGAGTGAAGTGCACTTTCGGGGGAAAGCATGCCGGAATCTGGCCCAGA  
AAAGAGGGGCGCTGGGGGAAGGG

>1861

CTGCTGTTGCTGCCGCTGCCGTTTTAAAGGCCCCCTGGTGACAAAGGAGTGAAGTGCAC  
TTTCGGGGGAAAGCATGCCGGAATCTGGCCCAGAAAAGAGGGGCGCTGGGGGAAGG  
GTTTGGAGATGACGCCTCCTCAGGAA

>1862

GTTTTAAAGGCCCCCTGGTGACAAAGGAGTGAAGTGCACTTTCGGGGGAAAGCATGCCG  
GAATCTGGCCCAGAAAAGAGGGGCGCTGGGGGAAGGGTTTGGAGATGACGCCTCCT  
CAGGAACTTTAAAAGAAATCTGTCCA

>1863

AAAGGCCCCCTGGTGACAAAGGAGTGAAGTGCACTTTCGGGGGAAAGCATGCCGGAATC  
TGGCCCAGAAAAGAGGGGCGCTGGGGGAAGGGTTTGGAGATGACGCCTCCTCAGGA  
ACTTTAAAAGAAATCTGTCCATCTGT

>1864

CTGCACTTTCGGGGGAAAGCATGCCGGAATCTGGCCCAGAAAAGAGGGGCGCTGGGG  
GAAGGGTTTGGAGATGACGCCTCCTCAGGAACTTTAAAAGAAATCTGTCCATCTGTCT  
CTGGCATTATGGCATCGTTGACAG

>1865

AAGCATGCCGGAATCTGGCCCAGAAAAGAGGGGCGCTGGGGGAAGGGTTTGGAGAT  
GACGCCTCCTCAGGAACTTTAAAAGAAATCTGTCCATCTGTCTCTGGCATTATGGCAT  
CGTTGACAGCAGTTCAAGGAAAAA

>1866

ATCTGGCCCAGAAAAGAGGGGCGCTGGGGGAAGGGTTTGGAGATGACGCCTCCTCA  
GGAACTTTAAAAGAAATCTGTCCATCTGTCTCTGGCATTATGGCATCGTTGACAGCAG  
TTCAAGGAAAAATAAAAATAAGTT

>1867

ATGACGCCTCCTCAGGAACTTTAAAAGAAATCTGTCCATCTGTCTCTGGCATTATGGC  
ATCGTTGACAGCAGTTCAAGGAAAAATAAAAATAAGTTCTTATCTGATTGCGGGGCTGA  
TTGCAAAGCCGAAGGACTAGAG

>1868

ACGCCTCCTCAGGAACTTTAAAAGAAATCTGTCCATCTGTCTCTGGCATTATGGCATC  
GTTGACAGCAGTTCAAGGAAAAATAAAAATAAGTTCTTATCTGATTGCGGGGCTGATTG  
CAAAGCCGAAGGACTAGAGTGG

>1869

CCTCAGGAACTTTAAAAGAAATCTGTCCATCTGTCTCTGGCATTATGGCATCGTTGAC  
AGCAGTTCAAGGAAAAATAAAAATAAGTTCTTATCTGATTGCGGGGCTGATTGCAAAG  
CCGAAGGACTAGAGTGGCCAGCG

>1870

AGAAATCTGTCCATCTGTCTCTGGCATTATGGCATCGTTGACAGCAGTTCAAGGAAAA  
ATAAAAATAAGTTCTTATCTGATTGCGGGGCTGATTGCAAAGCCGAAGGACTAGAGTG  
GCCAGCGAGTCGGGCGGCTGGAT



>1871

GTTGACAGCAGTTCAAGGAAAAATAAAAATAAGTTCTTATCTGATTGCGGGGCTGATTG  
CAAAGCCGAAGGACTAGAGTGGCCAGCGAGTCGGGCGGCTGGATCTGGAGTTTTGGA  
GAAAGGGCCACTGGCTCATTCTG

>1872

AGCAGTTCAAGGAAAAATAAAAATAAGTTCTTATCTGATTGCGGGGCTGATTGCAAAG  
CCGAAGGACTAGAGTGGCCAGCGAGTCGGGCGGCTGGATCTGGAGTTTTGGAGAAAG  
GGCCACTGGCTCATTCTGGGCACG

>1873

AGGAAAAATAAAAATAAGTTCTTATCTGATTGCGGGGCTGATTGCAAAGCCGAAGGAC  
TAGAGTGGCCAGCGAGTCGGGCGGCTGGATCTGGAGTTTTGGAGAAAGGGCCACTGG  
CTCATTCTGGGCACGCACGCTCAC

>1874

TCTGATTGCGGGGCTGATTGCAAAGCCGAAGGACTAGAGTGGCCAGCGAGTCGGGCG  
GCTGGATCTGGAGTTTTGGAGAAAGGGCCACTGGCTCATTCTGGGCACGCACGCTCA  
CGGAGGCAAGTTCTCACCTCCTCGT

>1875

TCGGGCGGCTGGATCTGGAGTTTTGGAGAAAGGGCCACTGGCTCATTCTGGGCACGC  
ACGCTCACGGAGGCAAGTTCTCACCTCCTCGTGGGCTTCTCTTCACTTTACGTGGAAA  
AACTGTGTACGTCTCAAATTAATA

>1876

CGGCTGGATCTGGAGTTTTGGAGAAAGGGCCACTGGCTCATTCTGGGCACGCACGCT  
CACGGAGGCAAGTTCTCACCTCCTCGTGGGCTTCTCTTCACTTTACGTGGAAAACTG  
TGTACGTCTCAAATTAATAAGCAGC

>1877

CAAGTTCTCACCTCCTCGTGGGCTTCTCTTCACTTTACGTGGAAAAACTGTGTACGTCT  
CAAATTAATAAGCAGCTCTTGCCCCGCTTAGAGCCGGTGAAAGCTGCTTCGAAGGCGTT  
TGTAAGTAGGGATTGGAAATGT

>1878

GTTCTCACCTCCTCGTGGGCTTCTCTTCACTTTACGTGGAAAAACTGTGTACGTCTCAA  
ATTAATAAGCAGCTCTTGCCCCGCTTAGAGCCGGTGAAAGCTGCTTCGAAGGCGTTTGT  
AGAGTAGGGATTGGAAATGTTCA

>1879

GGGCTTCTCTTCACTTTACGTGGAAAAACTGTGTACGTCTCAAATTAATAAGCAGCTCTT  
GCCCCGCTTAGAGCCGGTGAAAGCTGCTTCGAAGGCGTTTGTAGAGTAGGGATTGGAA  
ATGTTCAATGCAAAAGTTAAATC

>1880

GCTTCTCTTCACTTTACGTGGAAAAACTGTGTACGTCTCAAATTAATAAGCAGCTCTTGC  
CCCGCTTAGAGCCGGTGAAAGCTGCTTCGAAGGCGTTTGTAGAGTAGGGATTGGAAAT  
GTTCAATGCAAAAGTTAAATCGT

>1881

ACTTTACGTGGAAAAACTGTGTACGTCTCAAATTAATAAGCAGCTCTTGCCCCGCTTAG  
AGCCGGTGAAAGCTGCTTCGAAGGCGTTTGTAGAGTAGGGATTGGAAATGTTCAATGC  
AAAAGTTAAATCGTGACAGTTGTC

>1882

TACGTCTCAAATTAAAAGCAGCTCTTGCCCCGCTTAGAGCCGGTGAAAGCTGCTTCGA  
AGGCGTTTGTAGAGTAGGGATTGGAAATGTTCAATGCAAAAGTTAAATCGTGACAGTT  
GTCCCCTAAATGATCTGCTAAATT

>1883

CGCTTAGAGCCGGTGAAAGCTGCTTCGAAGGCGTTTGTAGAGTAGGGATTGGAAATGT  
TCAATGCAAAAGTTAAATCGTGACAGTTGTCCCCTAAATGATCTGCTAAATTAAGGATC  
CGCTAACATTTGTGAGTCTACCT

>1884

GAAAGCTGCTTCGAAGGCGTTTGTAGAGTAGGGATTGGAAATGTTCAATGCAAAAGTT  
AAATCGTGACAGTTGTCCCCTAAATGATCTGCTAAATTAAGGATCCGCTAACATTTGTG  
AGTCTACCTCCCTGCATTCCCCC

>1885

AGGGATTGGAAATGTTCAATGCAAAAGTTAAATCGTGACAGTTGTCCCCTAAATGATCT  
GCTAAATTAAGGATCCGCTAACATTTGTGAGTCTACCTCCCTGCATTCCCCCCACCCCC  
ACCCCCGCCCCCTTGGCAGAAG

>1886

GCAAAAGTTAAATCGTGACAGTTGTCCCCTAAATGATCTGCTAAATTAAGGATCCGCTA  
ACATTTGTGAGTCTACCTCCCTGCATTCCCCCCACCCCCACCCCCGCCCCCTTGGCAGA  
AGGGATAAAGATGGTACCTAAA

>1887

AAGGATCCGCTAACATTTGTGAGTCTACCTCCCTGCATTCCCCCCACCCCCACCCCCGC  
CCCCTTGGCAGAAGGGATAAAGATGGTACCTAAAAACAATGTGAAGCGGCTGCTAAAT  
CGAGTGACTCTAAAAACATTTTT

>1888

GATCCGCTAACATTTGTGAGTCTACCTCCCTGCATTCCCCCCACCCCCACCCCCGCCCC  
CTTGGCAGAAGGGATAAAGATGGTACCTAAAAACAATGTGAAGCGGCTGCTAAATCGA  
GTGACTCTAAAAACATTTTTCTT

>1889

AACATTTGTGAGTCTACCTCCCTGCATTCCCCCCACCCCCACCCCCGCCCCCTTGGCAG  
AAGGGATAAAGATGGTACCTAAAAACAATGTGAAGCGGCTGCTAAATCGAGTGACTCT  
AAAAACATTTTTCTTTCCTTGAA

>1890

CATCCCCCCACCCCCACCCCCGCCCCCTTGGCAGAAGGGATAAAGATGGTACCTAAA  
AACAAATGTGAAGCGGCTGCTAAATCGAGTGACTCTAAAAACATTTTTCTTTCCTTGAAG  
TTCAGTGTGAAAACCACTGG

>1891

ACCCCCGCCCCCTTGGCAGAAGGGATAAAGATGGTACCTAAAAACAATGTGAAGCGGC  
TGCTAAATCGAGTGACTCTAAAAACATTTTTCTTTCCTTGAAGTTCAGTGTGAAAACC  
AGACTGGACTTGTACAGGGATGCA

>1892

TGGTACCTAAAAACAATGTGAAGCGGCTGCTAAATCGAGTGACTCTAAAAACATTTTT  
CTTTCCTTGAAGTTCAGTGTGAAAACCACTGGACTTGTACAGGGATGCAGACCTAT  
ATAGGGCCCATGTGCCTGGCCCCCT

>1893

CCTAAAAACAATGTGAAGCGGCTGCTAAATCGAGTGACTCTAAAAACATTTTTCTTTCC  
TTGAAGTTCAGTGTGGAAAACCAGACTGGACTTGTGAGGGATGCAGACCTATATAGGG  
CCCATGTGCCTGGCCCCTTTCCT

>1894

AATCGAGTGACTCTAAAAACATTTTTCTTTCCTTGAAGTTCAGTGTGGAAAACCAGAC  
TGGACTTGTGAGGGATGCAGACCTATATAGGGGCCCATGTGCCTGGCCCCTTTCCTCACT  
TTCTAGCACAAATGGTTTTTCATTG

>1895

ACATTTTTCTTTCCTTGAAGTTCAGTGTGGAAAACCAGACTGGACTTGTGAGGGATGC  
AGACCTATATAGGGGCCCATGTGCCTGGCCCCTTTCCTCACTTTCTAGCACAAATGGTTTTC  
ATTGCCACCTCTCCCGCGCCTT

>1896

CAGACTGGACTTGTGAGGGATGCAGACCTATATAGGGGCCCATGTGCCTGGCCCCTTTCC  
TCACTTTCTAGCACAAATGGTTTTTCATTGCCACCTCTCCCGCGCCTTCCCCCCTTCATAA  
TTATCCACTATTTTACTTTCT

>1897

CATTGCCACCTCTCCCGCGCCTTTCCCCCCTTCATAATTATCCACTATTTTACTTTCTGTG  
TCCTGACAGCTACAAGAGTAGTTTTTGTTTTTTTGAGCTGAGTAGCTGCTAAATATTCCC  
CAGCAGCCAGATTCAACGG

>1898

ACCTCTCCCGCGCCTTTCCCCCCTTCATAATTATCCACTATTTTACTTTCTGTGTCCTGAC  
AGCTACAAGAGTAGTTTTTGTTTTTTTGAGCTGAGTAGCTGCTAAATATTCCCCAGCAG  
CCAGATTCAACGGCTGGGGG

>1899

CCTTCATAATTATCCACTATTTTACTTTCTGTGTCCTGACAGCTACAAGAGTAGTTTTTG  
TTTTTTGAGCTGAGTAGCTGCTAAATATTCCCCAGCAGCCAGATTCAACGGCTGGGGGG  
GAGAATAGGCCAAACCTTGG

>1900

TTCTGTGTCCTGACAGCTACAAGAGTAGTTTTTGTTTTTTTGAGCTGAGTAGCTGCTAA  
ATATTCCCCAGCAGCCAGATTCAACGGCTGGGGGGGAGAATAGGCCAAACCTTGGCAT  
CCCCTGTTGCAAAAGTGAAAAAT

>1901

TGTGTCCTGACAGCTACAAGAGTAGTTTTTGTTTTTTTGAGCTGAGTAGCTGCTAAATA  
TTCCCCAGCAGCCAGATTCAACGGCTGGGGGGGAGAATAGGCCAAACCTTGGCATCCC  
CTGTTGCAAAAGTGAAAAATATT

>1902

TCCTGACAGCTACAAGAGTAGTTTTTGTTTTTTTGAGCTGAGTAGCTGCTAAATATTCCC  
CAGCAGCCAGATTCAACGGCTGGGGGGGAGAATAGGCCAAACCTTGGCATCCCCTGTT  
GCAAAAGTGAAAAATATTCTG

>1903

GTTTTTGTTTTTTTGAGCTGAGTAGCTGCTAAATATTCCCCAGCAGCCAGATTCAACGG  
CTGGGGGGGAGAATAGGCCAAACCTTGGCATCCCCTGTTGCAAAAGTGAAAAATATT  
CTGTTTGAGTTAATTTTAGTGG

>1904

TTCCCCAGCAGCCAGATTCAACGGCTGGGGGGGAGAATAGGCCAAACCTTGGCATCCC  
CTGTTGCAAAAGTGAAAAATATTTCTGTTTGCAGTTAATTTTAGTGGCAAGCAGATCAT  
GTAACTGGATGTAATTGCTTCC

>1905

GGCTGGGGGGGAGAATAGGCCAAACCTTGGCATCCCCTGTTGCAAAAGTGAAAAATAT  
TTCTGTTTGCAGTTAATTTTAGTGGCAAGCAGATCATGTAACTGGATGTAATTGCTTCC  
AGATATGGCCGAGGGTTTTGTG

>1906

GAGAATAGGCCAAACCTTGGCATCCCCTGTTGCAAAAGTGAAAAATATTTCTGTTTGC  
AGTTAATTTTAGTGGCAAGCAGATCATGTAACTGGATGTAATTGCTTCCAGATATGGCC  
GAGGGTTTTGTGTGTTGAGATG

>1907

AAAAATATTTCTGTTTGCAGTTAATTTTAGTGGCAAGCAGATCATGTAACTGGATGTAA  
TTGCTTCCAGATATGGCCGAGGGTTTTGTGTGTTGAGATGAAGGGTCTGGTAAGTGCTT  
ACTTCCTGTGTAAATTAGCCT

>1908

TGTTTGCAGTTAATTTTAGTGGCAAGCAGATCATGTAACTGGATGTAATTGCTTCCAGA  
TATGGCCGAGGGTTTTGTGTGTTGAGATGAAGGGTCTGGTAAGTGCTTACTTCCTGTGT  
AAATTAGCCTATTCCATTCAG

>1909

TAGTGGCAAGCAGATCATGTAACTGGATGTAATTGCTTCCAGATATGGCCGAGGGTTT  
TGTGTGTTGAGATGAAGGGTCTGGTAAGTGCTTACTTCCTGTGTAAATTAGCCTATTCCA  
TTCAGTCTTTCATTCTGGCCA

>1910

CAGATATGGCCGAGGGTTTTGTGTGTTGAGATGAAGGGTCTGGTAAGTGCTTACTTCCT  
GTGTAAATTAGCCTATTCCATTCAGTCTTTCATTCTGGCCAGCCCTGGATTCTGTCAATC  
TGCTCCCATTTTCCCCCTCCC

>1911

GGTTTTGTGTGTTGAGATGAAGGGTCTGGTAAGTGCTTACTTCCTGTGTAAATTAGCCT  
ATTCCATTCAGTCTTTCATTCTGGCCAGCCCTGGATTCTGTCAATCTGCTCCCATTTTCC  
CCCTCCCCAGCCTGCAGCCTG

>1912

ATTCCATTCAGTCTTTCATTCTGGCCAGCCCTGGATTCTGTCAATCTGCTCCCATTTTCC  
CCCTCCCCAGCCTGCAGCCTGGTGTGAGAAGCCGCTTGCTATGTTCCCTCTAAGTGTAAT  
TCTTTTGTCACTTGGAGCCAC

>1913

TCAGTCTTTCATTCTGGCCAGCCCTGGATTCTGTCAATCTGCTCCCATTTTCCCCCTCCC  
CAGCCTGCAGCCTGGTGTGAGAAGCCGCTTGCTATGTTCCCTCTAAGTGTAATCTTTTG  
TCACTTGGAGCCACTCTCCTC

>1914

TTCTGCTCCCATTTTCCCCCTCCCCAGCCTGCAGCCTGGTGTGAGAAGCCGCTTGCTAT  
GTTCCCTCTAAGTGTAATCTTTTGTCACTTGGAGCCACTCTCCTCTTGGTTCTTGATGTG  
AGTTTGCCCTTAAATAATGAG

>1915

CCAGCCTGCAGCCTGGTGTGAGAAGCCGCTTGCTATGTTTCCTCTAAGTGTAATTCTTTT  
GTCACCTTGGAGCCACTCTCCTCTTGGTTCTTGATGTGAGTTTGCCCTTAAATAATGAGA  
AGGGTTTGAAAAGATGCCACCT

>1916

CTTGCTATGTTTCCTCTAAGTGTAATTCTTTTGTCACTTGGAGCCACTCTCCTCTTGGTTC  
TTGATGTGAGTTTGCCCTTAAATAATGAGAAGGGTTTGAAAAGATGCCACCTGGACCC  
CAGGCCACCTCCCGCCTCTTTC

>1917

TGTAATTCTTTTGTCACTTGGAGCCACTCTCCTCTTGGTTCTTGATGTGAGTTTGCCCTT  
AAATAATGAGAAGGGTTTGAAAAGATGCCACCTGGACCCAGGCCACCTCCCGCCTCT  
TTCCCAGCAAAGGCAGATCTGA

>1918

CACTTGGAGCCACTCTCCTCTTGGTTCTTGATGTGAGTTTGCCCTTAAATAATGAGAAG  
GGTTTGAAAAGATGCCACCTGGACCCAGGCCACCTCCCGCCTCTTTCCCAGCAAAGG  
CAGATCTGAAGAGCATCTCCTGG

>1919

CCCTTAAATAATGAGAAGGGTTTGAAAAGATGCCACCTGGACCCAGGCCACCTCCCG  
CCTCTTTCCCAGCAAAGGCAGATCTGAAGAGCATCTCCTGGTCATGGGGGTTGCATCTT  
GGAACCCAGAACTCCTTGTTTTTC

>1920

AAATAATGAGAAGGGTTTGAAAAGATGCCACCTGGACCCAGGCCACCTCCCGCCTCT  
TTCCCAGCAAAGGCAGATCTGAAGAGCATCTCCTGGTCATGGGGGTTGCATCTTGGA  
CCCAGAACTCCTTGTTTTCTATGC

>1921

CGCCTCTTTCCCAGCAAAGGCAGATCTGAAGAGCATCTCCTGGTCATGGGGGTTGCAT  
CTTGGAACCCAGAACTCCTTGTTTTCTATGCATTTTTTTTTCTACTGCCCTCTGACCCC  
CGACTCTCACCTGGGAGAACAC

>1922

CCCAGAACTCCTTGTTTTCTATGCATTTTTTTTTCTACTGCCCTCTGACCCCCGACTCT  
CACCTGGGAGAACACCTTCTCTTTCTCTCAATTAGTCCGACTCCTCCTCAGCCTGAACT  
AAGCACGTTCCAGTGGGTCCG

>1923

TTTTTTTTCTACTGCCCTCTGACCCCCGACTCTCACCTGGGAGAACACCTTCTCTTTC  
TCTCAATTAGTCCGACTCCTCCTCAGCCTGAACTAAGCACGTTCCAGTGGGTCCGAAAT  
CTCAGAAAAAATGAAACGGCT

>1924

CCCTCTGACCCCCGACTCTCACCTGGGAGAACACCTTCTCTTTCTCTCAATTAGTCCGA  
CTCCTCCTCAGCCTGAACTAAGCACGTTCCAGTGGGTCCGAAATCTCAGAAAAAATGA  
AACGGCTGTTGCGCAGAGGAGAA

>1925

CCGACTCTCACCTGGGAGAACACCTTCTCTTTCTCTCAATTAGTCCGACTCCTCCTCAG  
CCTGAACTAAGCACGTTCCAGTGGGTCCGAAATCTCAGAAAAAATGAAACGGCTGTTG  
CGCAGAGGAGAAAGTTGTGGCCA

>1926

CCTGGGAGAACACCTTCTCTTTCTCTCAATTAGTCCGACTCCTCCTCAGCCTGAACTAA  
GCACGTTCCAGTGGGTCCGAAATCTCAGAAAAAATGAAACGGCTGTTGCGCAGAGGA  
GAAGGTTGTGGCCACAGAAAGGAG

>1927

TCCTCAGCCTGAACTAAGCACGTTCCAGTGGGTCCGAAATCTCAGAAAAAATGAAACG  
GCTGTTGCGCAGAGGAGAAGGTTGTGGCCACAGAAAGGAGTTGCCTCATCAGACGTG  
AAGCCGCCACCTTGCTTGCAAAGC

>1928

CTCAGCCTGAACTAAGCACGTTCCAGTGGGTCCGAAATCTCAGAAAAAATGAAACGG  
CTGTTGCGCAGAGGAGAAGGTTGTGGCCACAGAAAGGAGTTGCCTCATCAGACGTGA  
AGCCGCCACCTTGCTTGCAAAGCAG

>1929

GTTCCAGTGGGTCCGAAATCTCAGAAAAAATGAAACGGCTGTTGCGCAGAGGAGAAG  
GTTGTGGCCACAGAAAGGAGTTGCCTCATCAGACGTGAAGCCGCCACCTTGCTTGCA  
AAGCAGGCTGCACCTCCTGACACAC

>1930

CTCAGAAAAAATGAAACGGCTGTTGCGCAGAGGAGAAGGTTGTGGCCACAGAAAGG  
AGTTGCCTCATCAGACGTGAAGCCGCCACCTTGCTTGCAAAGCAGGCTGCACCTCCT  
GACACACCTGCCCCTCCCTGCAAGAA

>1931

GAGGAGAAGGTTGTGGCCACAGAAAGGAGTTGCCTCATCAGACGTGAAGCCGCCACC  
TTGCCTTGCAAAGCAGGCTGCACCTCCTGACACACCTGCCCCTCCCTGCAAGAAAGG  
GAGGGGAAATCCCAACCAAGAGAACC

>1932

GAGAAGGTTGTGGCCACAGAAAGGAGTTGCCTCATCAGACGTGAAGCCGCCACCTTG  
CCTTGCAAAGCAGGCTGCACCTCCTGACACACCTGCCCCTCCCTGCAAGAAAGGGAG  
GGGAAATCCCAACCAAGAGAACCTTC

>1933

AGACGTGAAGCCGCCACCTTGCTTGCAAAGCAGGCTGCACCTCCTGACACACCTGC  
CCCTCCCTGCAAGAAAGGGAGGGGAAATCCCAACCAAGAGAACCTTCTCCAGGTTCC  
TGTGGGTTTCCAGGGTTGCAACTGAA

>1934

AGCCGCCACCTTGCTTGCAAAGCAGGCTGCACCTCCTGACACACCTGCCCCTCCCTG  
CAAGAAAGGGAGGGGAAATCCCAACCAAGAGAACCTTCTCCAGGTTCTGTGGGTTT  
CCAGGGTTGCAACTGAAGAAAAGTG

>1935

GCAAAGCAGGCTGCACCTCCTGACACACCTGCCCCTCCCTGCAAGAAAGGGAGGGGA  
AATCCCAACCAAGAGAACCTTCTCCAGGTTCTGTGGGTTTCCAGGGTTGCAACTGAA  
GAAAAGTGTTAAGATTCATGTTCTC

>1936

ACCTCCTGACACACCTGCCCCTCCCTGCAAGAAAGGGAGGGGAAATCCCAACCAAGA  
GAACCTTCTCCAGGTTCTGTGGGTTTCCAGGGTTGCAACTGAAGAAAAGTGTTAAGA  
TTCATGTTCTCCTAAATTCTGCTTT

>1937

AAGGGAGGGGAAATCCCACCCAAGAGAACCTTCTCCAGGTTCTGTGGGTTTCCAGG  
GTTGCAACTGAAGAAAAGTGTTAAGATTCATGTTCTCCTAAATTCTGCTTTTGTCTGT  
GGCCAGTCCCACATTCTTAGTGCT

>1938

AGGGGAAATCCCACCCAAGAGAACCTTCTCCAGGTTCTGTGGGTTTCCAGGGTTGCA  
ACTGAAGAAAAGTGTTAAGATTCATGTTCTCCTAAATTCTGCTTTTGTCTGTGGCCAG  
TCCCACATTCTTAGTGCTATTTG

>1939

CCAGGGTTGCAACTGAAGAAAAGTGTTAAGATTCATGTTCTCCTAAATTCTGCTTTTGT  
CCTGTGGCCAGTCCCACATTCTTAGTGCTATTTGCATAAGAGGTTGCTGTTTATCTTCCT  
ATATCAGCCCCACTGATAACC

>1940

GAAGAAAAGTGTTAAGATTCATGTTCTCCTAAATTCTGCTTTTGTCTGTGGCCAGTCC  
CACATTCTTAGTGCTATTTGCATAAGAGGTTGCTGTTTATCTTCCTATATCAGCCCCACTG  
ATAACCCCTGTGGTCTGTTT

>1941

GATTCATGTTCTCCTAAATTCTGCTTTTGTCTGTGGCCAGTCCCACATTCTTAGTGCTA  
TTTGCATAAGAGGTTGCTGTTTATCTTCCTATATCAGCCCCACTGATAACCCCTGTGGTC  
TGTTTAACAACCTATGAGGA

>1942

TGTCCTGTGGCCAGTCCCACATTCTTAGTGCTATTTGCATAAGAGGTTGCTGTTTATCTT  
CCTATATCAGCCCCACTGATAACCCCTGTGGTCTGTTTAACAACCTATGAGGAGTAGATT  
ACTTGATAAATGCCAGTTTT

>1943

AGAGGTTGCTGTTTATCTTCCTATATCAGCCCCACTGATAACCCCTGTGGTCTGTTTAAC  
AACCTATGAGGAGTAGATTACTTGATAAATGCCAGTTTTTCCAATATGCAAAGATAAAC  
TGTTGGGGTCAGGGTGAGGGG

>1944

GGTTGCTGTTTATCTTCCTATATCAGCCCCACTGATAACCCCTGTGGTCTGTTTAACAAC  
CTATGAGGAGTAGATTACTTGATAAATGCCAGTTTTTCCAATATGCAAAGATAAACTGTT  
GGGGTCAGGGTGAGGGGTGG

>1945

TCAGCCCCACTGATAACCCCTGTGGTCTGTTTAACAACCTATGAGGAGTAGATTACTTG  
ATAAATGCCAGTTTTTCCAATATGCAAAGATAAACTGTTGGGGTCAGGGTGAGGGGTG  
GTGTGTTATGAAGGAGGGGACAG

>1946

CCTGTGGTCTGTTTAACAACCTATGAGGAGTAGATTACTTGATAAATGCCAGTTTTTCCA  
ATATGCAAAGATAAACTGTTGGGGTCAGGGTGAGGGGTGGTGTGTTATGAAGGAGGGG  
ACAGGTGGGGAGCCAGGACCCT

>1947

ACCTATGAGGAGTAGATTACTTGATAAATGCCAGTTTTTCCAATATGCAAAGATAAACT  
GTTGGGGTCAGGGTGAGGGGTGGTGTGTTATGAAGGAGGGGACAGGTGGGGAGCCAG  
GACCCTCTTTTAGTGGGCTGGAGA

>1948

TAAATGCCAGTTTTTCCAATATGCAAAGATAAACTGTTGGGGTCAGGGTGAGGGGTGG  
TGTGTTATGAAGGAGGGGACAGGTGGGGAGCCAGGACCCTCTTTTAGTGGGCTGGAG  
AAGTGTGAAAGAGCCTGATGAAAGA

>1949

ATGCCAGTTTTTCCAATATGCAAAGATAAACTGTTGGGGTCAGGGTGAGGGGTGGTGT  
GTTATGAAGGAGGGGACAGGTGGGGAGCCAGGACCCTCTTTTAGTGGGCTGGAGAAG  
TGTGAAAGAGCCTGATGAAAGAAAA

>1950

TTTTTCCAATATGCAAAGATAAACTGTTGGGGTCAGGGTGAGGGGTGGTGTGTTATGAA  
GGAGGGGACAGGTGGGGAGCCAGGACCCTCTTTTAGTGGGCTGGAGAAGTGTGAAAG  
AGCCTGATGAAAGAAAACAGGTAG

>1951

ATATGCAAAGATAAACTGTTGGGGTCAGGGTGAGGGGTGGTGTGTTATGAAGGAGGGG  
ACAGGTGGGGAGCCAGGACCCTCTTTTAGTGGGCTGGAGAAGTGTGAAAGAGCCTGA  
TGAAAGAAAACAGGTAGCTTGTCAC

>1952

GTTGGGGTCAGGGTGAGGGGTGGTGTGTTATGAAGGAGGGGACAGGTGGGGAGCCAG  
GACCCTCTTTTAGTGGGCTGGAGAAGTGTGAAAGAGCCTGATGAAAGAAAACAGGTA  
GCTTGTCACATACAACAGCTGCATTT

>1953

GGAGGGGACAGGTGGGGAGCCAGGACCCTCTTTTAGTGGGCTGGAGAAGTGTGAAAG  
AGCCTGATGAAAGAAAACAGGTAGCTTGTCACATACAACAGCTGCATTTATCATACGGT  
TGATCAGCTTCCTGCCCTCACCTA

>1954

ACAGGTGGGGAGCCAGGACCCTCTTTTAGTGGGCTGGAGAAGTGTGAAAGAGCCTGA  
TGAAAGAAAACAGGTAGCTTGTCACATACAACAGCTGCATTTATCATACGGTTGATCAG  
CTTCCTGCCCTCACCTACTTTTCT

>1955

TCTTTTAGTGGGCTGGAGAAGTGTGAAAGAGCCTGATGAAAGAAAACAGGTAGCTTG  
TCACATACAACAGCTGCATTTATCATACGGTTGATCAGCTTCCTGCCCTCACCTACTTTT  
CTCCTCCTTCATGTGGACATGCA

>1956

AAAGAGCCTGATGAAAGAAAACAGGTAGCTTGTCACATACAACAGCTGCATTTATCAT  
ACGGTTGATCAGCTTCCTGCCCTCACCTACTTTTCTCCTCCTTCATGTGGACATGCAGA  
GTCTCTGAGAACATTTTCATCAAG

>1957

TGCATTTATCATACGGTTGATCAGCTTCCTGCCCTCACCTACTTTTCTCCTCCTTCATGTG  
GACATGCAGAGTCTCTGAGAACATTTTCATCAAGTGGGTTGCCTATGCCCACATTAATAC  
AAGATGGGAAAGGGTGGAGG

>1958

ATACGGTTGATCAGCTTCCTGCCCTCACCTACTTTTCTCCTCCTTCATGTGGACATGCAG  
AGTCTCTGAGAACATTTTCATCAAGTGGGTTGCCTATGCCCACATTAATACAAGATGGGA  
AAGGGTGGAGGTTATCTTTGC



>1959

CTTCCTGCCCTCACCTACTTTTCTCCTCCTTCATGTGGACATGCAGAGTCTCTGAGAAC  
ATTCATCAAGTGGGTGCCTATGCCACATTAATACAAGATGGGAAAGGGTGGAGGTT  
ATCTTTGCTTTTTTAAGTTCCCA

>1960

TTCATGTGGACATGCAGAGTCTCTGAGAACATTCATCAAGTGGGTGCCTATGCCAC  
ATTAATACAAGATGGGAAAGGGTGGAGGTTATCTTTGCTTTTTTAAGTTCCCATCTTTTC  
TCCCTTGGTCCTCTCCCACCC

>1961

GAGTCTCTGAGAACATTCATCAAGTGGGTGCCTATGCCACATTAATACAAGATGGG  
AAAGGGTGGAGGTTATCTTTGCTTTTTTAAGTTCCCATCTTTTTCTCCCTTGGTCCTCTCC  
CACCCCTACAAGTTGTTGGCT

>1962

ATCAAGTGGGTGCCTATGCCACATTAATACAAGATGGGAAAGGGTGGAGGTTATCTT  
TGCTTTTTTAAGTTCCCATCTTTTTCTCCCTTGGTCCTCTCCCACCCCTACAAGTTGTTGG  
CTGGTAAGCAATTGATGCTCA

>1963

AGGGTGGAGGTTATCTTTGCTTTTTTAAGTTCCCATCTTTTTCTCCCTTGGTCCTCTCCCA  
CCCTACAAGTTGTTGGCTGGTAAGCAATTGATGCTCAGAAAAATGATGTTTCATCTGAA  
ATCTTAAATGAGTGGACTTTT

>1964

TTTGCTTTTTTAAGTTCCCATCTTTTTCTCCCTTGGTCCTCTCCCACCCCTACAAGTTGTT  
GGCTGGTAAGCAATTGATGCTCAGAAAAATGATGTTTCATCTGAAATCTTAAATGAGTGG  
ACTTTTTCTACCTTCCCTGAC

>1965

TCCCATCTTTTTCTCCCTTGGTCCTCTCCCACCCCTACAAGTTGTTGGCTGGTAAGCAAT  
TGATGCTCAGAAAAATGATGTTTCATCTGAAATCTTAAATGAGTGGACTTTTTCTACCTTC  
CCTGACTTTGCAGGTGCTTC

>1966

TGCTCAGAAAAATGATGTTTCATCTGAAATCTTAAATGAGTGGACTTTTTCTACCTTCCCT  
GACTTTGCAGGTGCTTCTTGAAGAGCCAAGGAGAAAAGAAAACCTTCTGACCTCATCA  
CCTAGTCAATAAGCTGTCTGAGA

>1967

GATGTTTCATCTGAAATCTTAAATGAGTGGACTTTTTCTACCTTCCCTGACTTTGCAGGTG  
CTTCTTGAAGAGCCAAGGAGAAAAGAAAACCTTCTGACCTCATCACCTAGTCAATAAGC  
TGTCTGAGAAACAAACAAAAGA

>1968

CCTTCCCTGACTTTGCAGGTGCTTCTTGAAGAGCCAAGGAGAAAAGAAAACCTTCTGA  
CCTCATCACCTAGTCAATAAGCTGTCTGAGAAACAAACAAAAGAGTTTAGACTGGCTG  
CTAAAGCTAGGAACCCAGCTGATAG

>1969

GACTTTGCAGGTGCTTCTTGAAGAGCCAAGGAGAAAAGAAAACCTTCTGACCTCATCA  
CCTAGTCAATAAGCTGTCTGAGAAACAAACAAAAGAGTTTAGACTGGCTGCTAAAGCT  
AGGAACCCAGCTGATAGCTTTGTTT

>1970

GCCAAGGAGAAAAGAAAACCTTCTGACCTCATCACCTAGTCAATAAGCTGTCTGAGAA  
ACAAACAAAAGAGTTTAGACTGGCTGCTAAAGCTAGGAACCCAGCTGATAGCTTTGTT  
TTGATGTCCTTGTAATGTTTGCGGA

>1971

TTCTGACCTCATCACCTAGTCAATAAGCTGTCTGAGAAACAAACAAAAGAGTTTAGAC  
TGGCTGCTAAAGCTAGGAACCCAGCTGATAGCTTTGTTTTGATGTCCTTGTAATGTTTG  
CGGATCGCAGAGGGTGCTATTTA

>1972

GACCTCATCACCTAGTCAATAAGCTGTCTGAGAAACAAACAAAAGAGTTTAGACTGGC  
TGCTAAAGCTAGGAACCCAGCTGATAGCTTTGTTTTGATGTCCTTGTAATGTTTGCGGA  
TCGCAGAGGGTGCTATTTAGAGC

>1973

TCAATAAGCTGTCTGAGAAACAAACAAAAGAGTTTAGACTGGCTGCTAAAGCTAGGA  
ACCCAGCTGATAGCTTTGTTTTGATGTCCTTGTAATGTTTGCGGATCGCAGAGGGTGCT  
ATTTAGAGCAGGGGGCATCTACTG

>1974

CTGGCTGCTAAAGCTAGGAACCCAGCTGATAGCTTTGTTTTGATGTCCTTGTAATGTTT  
GCGGATCGCAGAGGGTGCTATTTAGAGCAGGGGGCATCTACTGGGACAGACTCACTGG  
GAAGTTGAAACAGCTAGCTCAAA

>1975

GGCTGCTAAAGCTAGGAACCCAGCTGATAGCTTTGTTTTGATGTCCTTGTAATGTTTGC  
GGATCGCAGAGGGTGCTATTTAGAGCAGGGGGCATCTACTGGGACAGACTCACTGGGA  
AGTTGAAACAGCTAGCTCAAAGT

>1976

TAGGAACCCAGCTGATAGCTTTGTTTTGATGTCCTTGTAATGTTTGCGGATCGCAGAGG  
GTGCTATTTAGAGCAGGGGGCATCTACTGGGACAGACTCACTGGGAAGTTGAAACAGC  
TAGCTCAAAGTCCAAGAGATGCT

>1977

TAATGTTTTGCGGATCGCAGAGGGTGCTATTTAGAGCAGGGGGCATCTACTGGGACAGA  
CTCACTGGGAAGTTGAAACAGCTAGCTCAAAGTCCAAGAGATGCTAAAGATAGTGAAA  
TACAGCCCAGGAATTGAGGGGGAG

>1978

CGGATCGCAGAGGGTGCTATTTAGAGCAGGGGGCATCTACTGGGACAGACTCACTGGG  
AAGTTGAAACAGCTAGCTCAAAGTCCAAGAGATGCTAAAGATAGTGAAATACAGCCCA  
GGAATTGAGGGGGAGGGGGTTCCT

>1979

TCGCAGAGGGTGCTATTTAGAGCAGGGGGCATCTACTGGGACAGACTCACTGGGAAGT  
TGAAACAGCTAGCTCAAAGTCCAAGAGATGCTAAAGATAGTGAAATACAGCCCAGGAA  
TTGAGGGGGAGGGGGTTCCTCACT

>1980

TTTAGAGCAGGGGGCATCTACTGGGACAGACTCACTGGGAAGTTGAAACAGCTAGCTC  
AAAGTCCAAGAGATGCTAAAGATAGTGAAATACAGCCCAGGAATTGAGGGGGAGGGG  
GTTTCCTCACTCAAGAAGGAGACTTT

>1981

GGGAAGTTGAAACAGCTAGCTCAAAGTCCAAGAGATGCTAAAGATAGTGAAATACAG  
CCCAGGAATTGAGGGGGAGGGGGTTCTCACTCAAGAAGGAGACTTTCTAGGAGGGG  
GCGGGCGTGGTATTTTCTAGGGACAG

>1982

TTGAAACAGCTAGCTCAAAGTCCAAGAGATGCTAAAGATAGTGAAATACAGCCCAGGA  
ATTGAGGGGGAGGGGGTTCTCACTCAAGAAGGAGACTTTCTAGGAGGGGGCGGGCG  
TGGTATTTTCTAGGGACAGTATGGA

>1983

AAGTCCAAGAGATGCTAAAGATAGTGAAATACAGCCCAGGAATTGAGGGGGAGGGGG  
TTCTCACTCAAGAAGGAGACTTTCTAGGAGGGGGCGGGCGTGGTATTTTCTAGGGAC  
AGTATGGAATGAAGGGAAGAAGGTT

>1984

ATTGAGGGGGAGGGGGTTCTCACTCAAGAAGGAGACTTTCTAGGAGGGGGCGGGCG  
TGGTATTTTCTAGGGACAGTATGGAATGAAGGGAAGAAGGTTGGCTTTAGAAGGAGGC  
ACCCTGTGGGAGGCTGAGACAGGTG

>1985

GGGGAGGGGGTTCTCACTCAAGAAGGAGACTTTCTAGGAGGGGGCGGGCGTGGTAT  
TTTCTAGGGACAGTATGGAATGAAGGGAAGAAGGTTGGCTTTAGAAGGAGGCACCCT  
GTGGGAGGCTGAGACAGGTGGGTCAC

>1986

CCTCACTCAAGAAGGAGACTTTCTAGGAGGGGGCGGGCGTGGTATTTTCTAGGGACAG  
TATGGAATGAAGGGAAGAAGGTTGGCTTTAGAAGGAGGCACCCTGTGGGAGGCTGAG  
ACAGGTGGGTCACCTGAGGTCAGGA

>1987

TGGTATTTTCTAGGGACAGTATGGAATGAAGGGAAGAAGGTTGGCTTTAGAAGGAGGC  
ACCCTGTGGGAGGCTGAGACAGGTGGGTCACCTGAGGTCAGGAGTTTGAGACCAGCC  
TGGCCAACATGGTGAAACCCAGTCT

>1988

TTTCTAGGGACAGTATGGAATGAAGGGAAGAAGGTTGGCTTTAGAAGGAGGCACCCT  
GTGGGAGGCTGAGACAGGTGGGTCACCTGAGGTCAGGAGTTTGAGACCAGCCTGGCC  
AACATGGTGAAACCCAGTCTCTACTA

>1989

AATGAAGGGAAGAAGGTTGGCTTTAGAAGGAGGCACCCTGTGGGAGGCTGAGACAG  
GTGGGTCACCTGAGGTCAGGAGTTTGAGACCAGCCTGGCCAACATGGTGAAACCCAG  
TCTCTACTAAAAATACAAAAATTAGCT

>1990

GAGGCTGAGACAGGTGGGTCACCTGAGGTCAGGAGTTTGAGACCAGCCTGGCCAACA  
TGGTGAAACCCAGTCTCTACTAAAAATACAAAAATTAGCTGGGTGGCAGGTGCCTGTA  
ATCCCAGCTAGTCGGGGGAGGCTGA

>1991

AGGTCAGGAGTTTGAGACCAGCCTGGCCAACATGGTGAAACCCAGTCTCTACTAAAAA  
TACAAAAATTAGCTGGGTGGCAGGTGCCTGTAATCCCAGCTAGTCGGGGGAGGCTGAG  
GCAGGAAAATCGCTTGGGATTACA

>1992

CAACATGGTGAAACCCAGTCTCTACTAAAAATACAAAAATTAGCTGGGTGGCAGGTGC  
CTGTAATCCCAGCTAGTCGGGGGAGGCTGAGGCAGGAAAATCGCTTGGGATTACAGGT  
GCCTGTAATCCCAGCTAGTCGGGA

>1993

ATGGTGAAACCCAGTCTCTACTAAAAATACAAAAATTAGCTGGGTGGCAGGTGCCTGT  
AATCCCAGCTAGTCGGGGGAGGCTGAGGCAGGAAAATCGCTTGGGATTACAGGTGCCT  
GTAATCCCAGCTAGTCGGGAGAGG

>1994

CCCAGTCTCTACTAAAAATACAAAAATTAGCTGGGTGGCAGGTGCCTGTAATCCCAGCT  
AGTCGGGGGAGGCTGAGGCAGGAAAATCGCTTGGGATTACAGGTGCCTGTAATCCCA  
GCTAGTCGGGAGAGGCTGAGGCAG

>1995

TGGGTGGCAGGTGCCTGTAATCCCAGCTAGTCGGGGGAGGCTGAGGCAGGAAAATCG  
CTTGGGATTACAGGTGCCTGTAATCCCAGCTAGTCGGGAGAGGCTGAGGCAGGAAAAT  
TGCTTGAAGGAGGCGGAGGTTGCAG

>1996

GTAATCCCAGCTAGTCGGGGGAGGCTGAGGCAGGAAAATCGCTTGGGATTACAGGTGC  
CTGTAATCCCAGCTAGTCGGGAGAGGCTGAGGCAGGAAAATTGCTTGAAGGAGGCGG  
AGGTTGCAGTGAGCCCAGATCCTGC

>1997

TCCCAGCTAGTCGGGGGAGGCTGAGGCAGGAAAATCGCTTGGGATTACAGGTGCCTGT  
AATCCCAGCTAGTCGGGAGAGGCTGAGGCAGGAAAATTGCTTGAAGGAGGCGGAGGT  
TGCAGTGAGCCCAGATCCTGCCGTT

>1998

TAGTCGGGGGAGGCTGAGGCAGGAAAATCGCTTGGGATTACAGGTGCCTGTAATCCCA  
GCTAGTCGGGAGAGGCTGAGGCAGGAAAATTGCTTGAAGGAGGCGGAGGTTGCAGTG  
AGCCCAGATCCTGCCGTTGCACTCC

>1999

TCGCTTGGGATTACAGGTGCCTGTAATCCCAGCTAGTCGGGAGAGGCTGAGGCAGGAA  
AATTGCTTGAAGGAGGCGGAGGTTGCAGTGAGCCCAGATCCTGCCGTTGCACTCCAGC  
CCAAGACTTTGTCTCATTAAAAAA

>2000

CTGTAATCCCAGCTAGTCGGGAGAGGCTGAGGCAGGAAAATTGCTTGAAGGAGGCGG  
AGGTTGCAGTGAGCCCAGATCCTGCCGTTGCACTCCAGCCCAAGACTTTGTCTCATT  
AAAAAAAAAAAAAGAAGAAGAAGAAG

>2001

ATCCCAGCTAGTCGGGAGAGGCTGAGGCAGGAAAATTGCTTGAAGGAGGCGGAGGTT  
GCAGTGAGCCCAGATCCTGCCGTTGCACTCCAGCCCAAGACTTTGTCTCATTAAAAAA  
AAAAAAGAAGAAGAAGAAGAAGGA

>2002

GCTGAGGCAGGAAAATTGCTTGAAGGAGGCGGAGGTTGCAGTGAGCCCAGATCCTGC  
CGTTGCACTCCAGCCCAAGACTTTGTCTCATTAAAAAAAAAAAAAGAAGAAGAAGAA  
GAAGGAGGCACCCTGGATGAAGACTC

>2003

GGTTGCAGTGAGCCCAGATCCTGCCGTTGCACTCCAGCCCAAGACTTTGTCTCATTA  
AAAAAAAAAAGAAGAAGAAGAAGAAGGAGGCACCCTGGATGAAGACTCAGGCTCC  
AGAATTTACTATCTGTATGTCTTGGG

>2004

TGCAGTGAGCCCAGATCCTGCCGTTGCACTCCAGCCCAAGACTTTGTCTCATTA  
AAAAAAAAAAGAAGAAGAAGAAGAAGGAGGCACCCTGGATGAAGACTCAGGCTCCAGA  
ATTTACTATCTGTATGTCTTGGGCAA

>2005

AGTGAGCCCAGATCCTGCCGTTGCACTCCAGCCCAAGACTTTGTCTCATTA  
AAAAAAGAAGAAGAAGAAGAAGGAGGCACCCTGGATGAAGACTCAGGCTCCAGAATT  
TACTATCTGTATGTCTTGGGCAAGTG

>2006

AGATCCTGCCGTTGCACTCCAGCCCAAGACTTTGTCTCATTA  
AAAAAAAAAAAAAAAAAAGAAG  
AAGAAGAAGAAGGAGGCACCCTGGATGAAGACTCAGGCTCCAGAATTTACTATCTGTA  
TGTCTTGGGCAAGTGGCTTAGCTT

>2007

CCAGCCCAAGACTTTGTCTCATTA  
AAAAAAAAAAAAAAAAAAGAAGAAGAAGAAGAAGGAGG  
CACCTGGATGAAGACTCAGGCTCCAGAATTTACTATCTGTATGTCTTGGGCAAGTGGC  
TTAGCTTCTCTGAGCCCCTGTTTAC

>2008

AGAAGAAGAAGGAGGCACCCTGGATGAAGACTCAGGCTCCAGAATTTACTATCTGTAT  
GTCTTGGGCAAGTGGCTTAGCTTCTCTGAGCCCCTGTTTACTTTTCTTTTGAAAATGAC  
CACCTTGTCCATGGTAATGAGGA

>2009

AAGGAGGCACCCTGGATGAAGACTCAGGCTCCAGAATTTACTATCTGTATGTCTTGGGC  
AAGTGGCTTAGCTTCTCTGAGCCCCTGTTTACTTTTCTTTTGAAAATGACCACCTTGTCTC  
CATGGTAATGAGGATAAAAAAC

>2010

AGTGGCTTAGCTTCTCTGAGCCCCTGTTTACTTTTCTTTTGAAAATGACCACCTTGTCCA  
TGGTAATGAGGATAAAAAACGTGTAAAGTGCATAGCAGAGTGCAGGTGTACTGGGTAG  
ACATGTATGATTGCGCTGTAGC

>2011

AGCCCCTGTTTACTTTTCTTTTGAAAATGACCACCTTGTCCATGGTAATGAGGATA  
AACGTGTAAAGTGCATAGCAGAGTGCAGGTGTACTGGGTAGACATGTATGATTGCGCT  
GTAGCCCTGTTATGGCCCGGGGA

>2012

CCACCTTGTCCATGGTAATGAGGATAAAAAACGTGTAAAGTGCATAGCAGAGTGCAGG  
TGTAAGGTAGACATGTATGATTGCGCTGTAGCCCTGTTATGGCCCGGGGAGAACTA  
TGAAAGGAACCAAGTGAAATCTTT

>2013

GGATAAAAAACGTGTAAAGTGCATAGCAGAGTGCAGGTGTACTGGGTAGACATGTATG  
ATTGCGCTGTAGCCCTGTTATGGCCCGGGGAGAACTATGAAAGGAACCAAGTGAAATC  
TTTTGTTTTGGGCACTGCTAAATT

>2014

GCATAGCAGAGTGCAGGTGTACTGGGTAGACATGTATGATTGCGCTGTAGCCCTGTTAT  
GGCCCGGGGAGAACTATGAAAGGAACCAGTGAAATCTTTTGT TTTGGGCACTGCTAA  
ATTGATGATAGTACTAACCCTGT

>2015

GCAGGTGTACTGGGTAGACATGTATGATTGCGCTGTAGCCCTGTTATGGCCCGGGGAGA  
AACTATGAAAGGAACCAGTGAAATCTTTTGT TTTGGGCACTGCTAAATTGATGATAGTA  
CTAACCCTGTGCTAGCAGCCAG

>2016

TACTGGGTAGACATGTATGATTGCGCTGTAGCCCTGTTATGGCCCGGGGAGAACTATG  
AAAGGAACCAGTGAAATCTTTTGT TTTGGGCACTGCTAAATTGATGATAGTACTAACCC  
TGTGCTAGCAGCCAGCCGGTGA

>2017

TGGCCCGGGGAGAACTATGAAAGGAACCAGTGAAATCTTTTGT TTTGGGCACTGCTA  
AATTGATGATAGTACTAACCCTGTGCTAGCAGCCAGCCGGTGAAATAATAGGTGAATAA  
TGTTAGTACATTGTGAATATAAA

>2018

ATGAAAGGAACCAGTGAAATCTTTTGT TTTGGGCACTGCTAAATTGATGATAGTACTAA  
CCCTGTGCTAGCAGCCAGCCGGTGAAATAATAGGTGAATAATGTTAGTACATTGTGAAT  
ATAAAAGTTTCCATTTGCAAAG

>2019

AAAGGAACCAGTGAAATCTTTTGT TTTGGGCACTGCTAAATTGATGATAGTACTAACCC  
TGTGCTAGCAGCCAGCCGGTGAAATAATAGGTGAATAATGTTAGTACATTGTGAATATA  
AAAGTTTCCATTTGCAAAGTGC

>2020

TTTGT TTTGGGCACTGCTAAATTGATGATAGTACTAACCCTGTGCTAGCAGCCAGCCGG  
TGAAATAATAGGTGAATAATGTTAGTACATTGTGAATATAAAAGTTTCCATTTGCAAAGT  
GCTACTGCTGTTCTAAAGAAG

>2021

CTAACCCTGTGCTAGCAGCCAGCCGGTGAAATAATAGGTGAATAATGTTAGTACATTGT  
GAATATAAAAGTTTCCATTTGCAAAGTGCTACTGCTGTTCTAAAGAAGCCACATTTCTA  
ATAAATGATTGCTTAATCCTGT

>2022

CAGCCAGCCGGTGAAATAATAGGTGAATAATGTTAGTACATTGTGAATATAAAAGTTTC  
CATTTGCAAAGTGCTACTGCTGTTCTAAAGAAGCCACATTTCTAATAAATGATTGCTTAA  
TCCTGTGATGCTGCCACAGCC

>2023

TAGGTGAATAATGTTAGTACATTGTGAATATAAAAGTTTCCATTTGCAAAGTGCTACTGC  
TGTTCTAAAGAAGCCACATTTCTAATAAATGATTGCTTAATCCTGTGATGCTGCCACAGC  
CCCACAGAGTTTGGGAATGT

>2024

AGTGCTACTGCTGTTCTAAAGAAGCCACATTTCTAATAAATGATTGCTTAATCCTGTGAT  
GCTGCCACAGCCCCACAGAGTTTGGGAATGTTTGGGAATTCTTTCTGAAGTGTGTGCC  
GCATTCTTTTGCTTTGCCTTTT

>2025

TGCTGTTCTAAAGAAGCCACATTTCTAATAAATGATTGCTTAATCCTGTGATGCTGCCAC  
AGCCCCACAGAGTTTGGGAATGTTTGGGAATTCTTTCTGAAGTGTGTGCCGCATTCTTT  
TGCTTTGCCTTTTGGGAGGGT

>2026

TGATTGCTTAATCCTGTGATGCTGCCACAGCCCCACAGAGTTTGGGAATGTTTGGGAAT  
TCTTTCTGAAGTGTGTGCCGCATTCTTTTGCTTTGCCTTTTGGGAGGGTAGATGTGACTA  
TTGGAAATGGTCAAAATAATG

>2027

CAGAGTTTGGGAATGTTTGGGAATTCTTTCTGAAGTGTGTGCCGCATTCTTTTGCTTTG  
CCTTTTGGGAGGGTAGATGTGACTATTGGAAATGGTCAAAATAATGCAGTAGCAAATCT  
GTTGACTATAGTGAGTGATAAG

>2028

GTGCCGCATTCTTTTGCTTTGCCTTTTGGGAGGGTAGATGTGACTATTGGAAATGGTCA  
AAATAATGCAGTAGCAAATCTGTTGACTATAGTGAGTGATAAGCACTGTCTGGCTGCTGT  
GTCTGACTCGGAAGGCAGATTC

>2029

CCGCATTCTTTTGCTTTGCCTTTTGGGAGGGTAGATGTGACTATTGGAAATGGTCAAAA  
TAATGCAGTAGCAAATCTGTTGACTATAGTGAGTGATAAGCACTGTCTGGCTGCTGTGTC  
TGACTCGGAAGGCAGATTCTGG

>2030

TTGGGAGGGTAGATGTGACTATTGGAAATGGTCAAAATAATGCAGTAGCAAATCTGTTG  
ACTATAGTGAGTGATAAGCACTGTCTGGCTGCTGTGTCTGACTCGGAAGGCAGATTCTG  
GAAGGGGTGTGTGGGAAGGCTT

>2031

TAATGCAGTAGCAAATCTGTTGACTATAGTGAGTGATAAGCACTGTCTGGCTGCTGTGTC  
TGACTCGGAAGGCAGATTCTGGAAGGGGTGTGTGGGAAGGCTTGTGGCTCAGCAC  
TGGGGTGAGTGTTGGCCTCACTTC

>2032

GCAGTAGCAAATCTGTTGACTATAGTGAGTGATAAGCACTGTCTGGCTGCTGTGTCTGAC  
TCGGAAGGCAGATTCTGGAAGGGGTGTGTGGGAAGGCTTGTGGCTCAGCACTGGG  
GTGAGTGTTGGCCTCACTTCTTAG

>2033

TGAGTGATAAGCACTGTCTGGCTGCTGTGTCTGACTCGGAAGGCAGATTCTGGAAGGGG  
TGTGTGGGAAGGCTTGTGGCTCAGCACTGGGGTGAGTGTTGGCCTCACTTCTTAGG  
TGGGAAGTGGAACAAGCCAAGGGG

>2034

TGTCGGCTGCTGTGTCTGACTCGGAAGGCAGATTCTGGAAGGGGTGTGTGGGAAGG  
CTTGTGGCTCAGCACTGGGGTGAGTGTTGGCCTCACTTCTTAGGTGGGAAGTGGAACA  
AGGCAAGGGGCTTTTGATTCCAG

>2035

TGTCTGACTCGGAAGGCAGATTCTGGAAGGGGTGTGTGGGAAGGCTTGTGGCTCA  
GCACTGGGGTGAGTGTTGGCCTCACTTCTTAGGTGGGAAGTGGAACAAGGCAAGGGG  
CTTTTGATTCCAGCTACTATGGCTG

>2036

ATTCTGGAAGGGGTGTGTGGGGAAGGCTTGTGGCTCAGCACTGGGGTGAGTGTTGG  
CCTCACTTCTTAGGTGGGAAGTGGACAAGGCCAAGGGGCTTTTGATTTCAGCTACTAT  
GGCTGGACTCCCAGTGAGGAAGGA

>2037

AAGGCTTGTGGCTCAGCACTGGGGTGAGTGTTGGCCTCACTTCTTAGGTGGGAAGTG  
GACAAGGCCAAGGGGCTTTTGATTTCAGCTACTATGGCTGGACTCCCAGTGAGGAAG  
GAGTCGCTGCCATGGATTGCCTGG

>2038

CACTGGGGTGAGTGTTGGCCTCACTTCTTAGGTGGGAAGTGGACAAGGCCAAGGGGC  
TTTTGATTTCAGCTACTATGGCTGGACTCCCAGTGAGGAAGGAGTCGCTGCCATGGAT  
TGCCTGGGACTGGGAAGACTCCTT

>2039

CACTTCTTAGGTGGGAAGTGGACAAGGCCAAGGGGCTTTTGATTTCAGCTACTATGG  
CTGGACTCCCAGTGAGGAAGGAGTCGCTGCCATGGATTGCCTGGGACTGGGAAGACT  
CCTTTTAACTGCTGTAATGTTTCTG

>2040

TTTCCAGCTACTATGGCTGGACTCCCAGTGAGGAAGGAGTCGCTGCCATGGATTGCCT  
GGGACTGGGAAGACTCCTTTTAACTGCTGTAATGTTTCTGCATTTGTGGTTTGGCCTCC  
TGTGAGTTTGGGCTCCGGGGCGG

>2041

TGCCTGGGACTGGGAAGACTCCTTTTAACTGCTGTAATGTTTCTGCATTTGTGGTTTGG  
CCTCCTGTGAGTTTGGGCTCCGGGGCGGCACTTCTGTTGTTAAAAGAACAGAAAAGA  
AAACAAAACAAAACAAAAAACCAG

>2042

AATGTTTCTGCATTTGTGGTTTGGCCTCCTGTGAGTTTGGGCTCCGGGGCGGCACTTCT  
GTTGTTAAAAGAACAGAAAAGAAAACAAAACAAAACAAAAAACCAGGACTGTCACT  
GTTAGATGTTGGTTGAGGCTAGAAA

>2043

TTTGGGCTCCGGGGCGGCACTTCTGTTGTTAAAAGAACAGAAAAGAAAACAAAACAA  
AACAAAAAACCAGGACTGTCACTGTTAGATGTTGGTTGAGGCTAGAAAGAATGGATTG  
AGTTTTGACCCCTACACCCAGGG

>2044

GGCACTTCTGTTGTTAAAAGAACAGAAAAGAAAACAAAACAAAACAAAAAACCAGG  
ACTGTCAGTGTAGATGTTGGTTGAGGCTAGAAAGAATGGATTGAGTTTTGACCCCTA  
CACCCAGGGAGTAGGGAGGCCTGG

>2045

ACAGAAAAGAAAACAAAACAAAACAAAAAACCAGGACTGTCAGTGTAGATGTTGGT  
TGAGGCTAGAAAGAATGGATTGAGTTTTGACCCCTACACCCAGGGAGTAGGGAGGC  
CTGGGAGGCACAGTGGCCTGAGTTT

>2046

AACAAAACAAAACAAAAAACCAGGACTGTCAGTGTAGATGTTGGTTGAGGCTAGAA  
AGAATGGATTGAGTTTTGACCCCTACACCCAGGGAGTAGGGAGGCCTGGGAGGCA  
CAGTGGCCTGAGTTTGAATTCTGACT



>2047

AGGACTGTCACTGTTAGATGTTGGTTGAGGCTAGAAAGAATGGATTGAGTTTTGACCC  
CCTACACCCCAGGGAGTAGGGAGGCCTGGGAGGCACAGTGGCCTGAGTTTGAATTCT  
GACTCTGCCTCTTTGGAAGGCTCTG

>2048

TGTTAGATGTTGGTTGAGGCTAGAAAGAATGGATTGAGTTTTGACCCCCTACACCCCAG  
GGAGTAGGGAGGCCTGGGAGGCACAGTGGCCTGAGTTTGAATTCTGACTCTGCCTCTT  
TGGAAGGCTCTGGAAGGTAAAG

>2049

AAGAATGGATTGAGTTTTGACCCCCTACACCCCAGGGAGTAGGGAGGCCTGGGAGGC  
ACAGTGGCCTGAGTTTGAATTCTGACTCTGCCTCTTTGGAAGGCTCTGGAAGGTAAAG  
GGAGCTTGTGTGTTCAAATCTTAGC

>2050

CCCCAGGGAGTAGGGAGGCCTGGGAGGCACAGTGGCCTGAGTTTGAATTCTGACTCT  
GCCTCTTTGGAAGGCTCTGGAAGGTAAAGGAGCTTGTGTGTTCAAATCTTAGCCTGG  
TACCTGGCATATACTCAGCATGTAT

>2051

TAGGGAGGCCTGGGAGGCACAGTGGCCTGAGTTTGAATTCTGACTCTGCCTCTTTGGA  
AGGCTCTGGAAGGTAAAGGAGCTTGTGTGTTCAAATCTTAGCCTGGTACCTGGCATAT  
ACTCAGCATGTATTTTTTCCCCT

>2052

GTTTGAATTCTGACTCTGCCTCTTTGGAAGGCTCTGGAAGGTAAAGGAGCTTGTGTG  
TTCAAATCTTAGCCTGGTACCTGGCATATACTCAGCATGTATTTTTTCCCCTTTCCTGAC  
AATGTTCTTGCCCCGAACACT

>2053

TTGGAAGGCTCTGGAAGGTAAAGGAGCTTGTGTGTTCAAATCTTAGCCTGGTACCTG  
GCATATACTCAGCATGTATTTTTTCCCCTTTCCTGACAATGTTCTTGCCCCGAACACTT  
GAATAGTGGAGAGAGGAATGTT

>2054

CCTGGCATATACTCAGCATGTATTTTTTCCCCTTTCCTGACAATGTTCTTGCCCCGAAC  
ACTTGAATAGTGGAGAGAGGAATGTTTGCTTTTCTCTCCATTGAACCAACACTCGCCC  
ATCCACTGAGCCCAAGATTCA

>2055

CATATACTCAGCATGTATTTTTTCCCCTTTCCTGACAATGTTCTTGCCCCGAACACTTG  
AATAGTGGAGAGAGGAATGTTTGCTTTTCTCTCCATTGAACCAACACTCGCCCATCCA  
CTGAGCCCAAGATTCACCTTA

>2056

CACTTGAATAGTGGAGAGAGGAATGTTTGCTTTTCTCTCCATTGAACCAACACTCGCC  
CATCCACTGAGCCCAAGATTCACCTTAGGATTGTCTGTTGGACTCGGCTCTTTTGTGAC  
CTAACAGTGCAGGGGCCTTGTG

>2057

AATAGTGGAGAGAGGAATGTTTGCTTTTCTCTCCATTGAACCAACACTCGCCCATCCA  
CTGAGCCCAAGATTCACCTTAGGATTGTCTGTTGGACTCGGCTCTTTTGTGACCTAACA  
GTGCAGGGGCCTTGTGCTGAGC

>2058

CGCCCATCCACTGAGCCCAAGATTCACCTTAGGATTGTCTGTTGGACTCGGCTCTTTTG  
TGACCTAACAGTGCAGGGGCCCTTGTGCTGAGCTGCACATGCTCGCTCTCGCTGGTGCT  
CCCTCTCTCTCTCTCTCTCTGTC

>2059

ATCCACTGAGCCCAAGATTCACCTTAGGATTGTCTGTTGGACTCGGCTCTTTTGTGACC  
TAACAGTGCAGGGGCCCTTGTGCTGAGCTGCACATGCTCGCTCTCGCTGGTGCTCCCTC  
TCTCTCTCTCTCTCTGTCTGCAT

>2060

GCTGAGCTGCACATGCTCGCTCTCGCTGGTGCTCCCTCTCTCTCTCTCTCTGTCTGC  
ATTATTTATAGTAAACCATATTAGAACAGAGTGTTAAAGAGGAAGGATGAGTCATTCCC  
ATTGAAACCATTGATGACATAA

>2061

GCTCTCGCTGGTGCTCCCTCTCTCTCTCTCTCTGTCTGCATTATTTATAGTAAACCATA  
TTAGAACAGAGTGTTAAAGAGGAAGGATGAGTCATTCCCATTGAAACCATTGATGACA  
TAAATAAAAGCAAAATGCTTA

>2062

TCTCGCTGGTGCTCCCTCTCTCTCTCTCTCTGTCTGCATTATTTATAGTAAACCATATT  
AGAACAGAGTGTTAAAGAGGAAGGATGAGTCATTCCCATTGAAACCATTGATGACATA  
AATAAAAGCAAAATGCTTACT

>2063

GTGCTCCCTCTCTCTCTCTCTCTGTCTGCATTATTTATAGTAAACCATATTAGAACAGA  
GTGTTAAAGAGGAAGGATGAGTCATTCCCATTGAAACCATTGATGACATAAATAAAAG  
CAAAATGCTTACTATGTGTTT

>2064

TATTAGAACAGAGTGTTAAAGAGGAAGGATGAGTCATTCCCATTGAAACCATTGATGA  
CATAAATAAAAGCAAAATGCTTACTATGTGTTTTGTGCAGTATTTAAGGCCAGGTTGTG  
CTAATTTGAATGCTCCCAAACCTG

>2065

ATGAGTCATTCCCATTGAAACCATTGATGACATAAATAAAAGCAAAATGCTTACTATGT  
GTTTTGTGCAGTATTTAAGGCCAGGTTGTGCTAATTTGAATGCTCCCAAACCTGGATCTG  
TGAAAGCATACATATGTGGGAA

>2066

TTCCCATTGAAACCATTGATGACATAAATAAAAGCAAAATGCTTACTATGTGTTTTGTGC  
AGTATTTAAGGCCAGGTTGTGCTAATTTGAATGCTCCCAAACCTGGATCTGTGAAAGCAT  
ACATATGTGGGAAAAAATTCA

>2067

TATGTGTTTTGTGCAGTATTTAAGGCCAGGTTGTGCTAATTTGAATGCTCCCAAACCTGGA  
TCTGTGAAAGCATACATATGTGGGAAAAAATTCAGGTTTAACTAGAGGGAAGTTATTTA  
TTGAAAATCCATTTCAAGTATC

>2068

CCAGGTTGTGCTAATTTGAATGCTCCCAAACCTGGATCTGTGAAAGCATACATATGTGGG  
AAAAAATTCAGGTTTAACTAGAGGGAAGTTATTTATTGAAAATCCATTTCAAGTATCTGCT  
TTCTCCCTTCTATTTACTTCA

>2069

CTAATTTGAATGCTCCCAAAGTGGATCTGTGAAAGCATACATATGTGGGAAAAAATTCA  
GGTTTAACTAGAGGGAAGTTATTTATTGAAAATCCATTTTCAGTATCTGCTTTCTCCCTTC  
TATTTACTTCAGATCCATATT

>2070

AATTTGAATGCTCCCAAAGTGGATCTGTGAAAGCATACATATGTGGGAAAAAATTTCAGG  
TTTAACTAGAGGGAAGTTATTTATTGAAAATCCATTTTCAGTATCTGCTTTCTCCCTTCTAT  
TTCATTCAGATCCATATTCA

>2071

GAATGCTCCCAAAGTGGATCTGTGAAAGCATACATATGTGGGAAAAAATTTCAGGTTTAA  
CTAGAGGGAAGTTATTTATTGAAAATCCATTTTCAGTATCTGCTTTCTCCCTTCTATTTACT  
TCAGATCCATATTCATATCA

>2072

AAAGCATACATATGTGGGAAAAAATTTCAGGTTTAACTAGAGGGAAGTTATTTATTGAAA  
ATCCATTTTCAGTATCTGCTTTCTCCCTTCTATTTACTTCAGATCCATATTCATATCATGCTT  
GTTGTTCTGGCTAACGAGA

>2073

TTTAACTAGAGGGAAGTTATTTATTGAAAATCCATTTTCAGTATCTGCTTTCTCCCTTCTAT  
TTCATTCAGATCCATATTCATATCATGCTTGTTGTTCTGGCTAACGAGAGGGACTGGCTT  
ATTCATAGCTAAGGTTTG

>2074

GTATCTGCTTTCTCCCTTCTATTTACTTCAGATCCATATTCATATCATGCTTGTTGTTCTGG  
CTAACGAGAGGGACTGGCTTATTCATAGCTAAGGTTTGTTTATTTTCGGAAGGTTGAG  
GAATAGCACAGAGAGGTTG

>2075

TTTACTTCAGATCCATATTCATATCATGCTTGTTGTTCTGGCTAACGAGAGGGACTGGCT  
TATTCATAGCTAAGGTTTGTTTATTTTCGGAAGGTTGAGGAATAGCACAGAGAGGTTG  
TCTAAGTGTCCTGTCTCCAT

>2076

TTCAGATCCATATTCATATCATGCTTGTTGTTCTGGCTAACGAGAGGGACTGGCTTATTC  
ACTAGCTAAGGTTTGTTTATTTTCGGAAGGTTGAGGAATAGCACAGAGAGGTTGTCTAA  
GTGTCCCTGTCTCCATTCCTC

>2077

CATGCTTGTTGTTCTGGCTAACGAGAGGGACTGGCTTATTCATAGCTAAGGTTTGTTT  
ATTTTCGGAAGGTTGAGGAATAGCACAGAGAGGTTGTCTAAGTGTCCTGTCTCCATTC  
CTCCTCTTGCCACCTGTTGAGG

>2078

TCTGGCTAACGAGAGGGACTGGCTTATTCATAGCTAAGGTTTGTTTATTTTCGGAAGG  
TTGAGGAATAGCACAGAGAGGTTGTCTAAGTGTCCTGTCTCCATTCCTCCTCTTGCCA  
CCTGTTGAGGAAGGCACTCTCC

>2079

GGTTGAGGAATAGCACAGAGAGGTTGTCTAAGTGTCCTGTCTCCATTCCTCCTCTTGC  
CACCTGTTGAGGAAGGCACTCTCCACCTGCTTTGCAGGCGTGGGCTCTCAATGTGTCC  
AAGAATCACAGTCAGAGCTGAAG

>2080

GAGGAATAGCACAGAGAGGTTGTCTAAGTGTCCCTGTCTCCATTCCCTCCTCTTGCCACC  
TGTTGAGGAAGGCACTCTCCACCTGCTTTGCAGGCGTGGGCTCTCAATGTGTCCAAGA  
ATCACAGTCAGAGCTGAAGGGCC

>2081

TCTAAGTGTCCCTGTCTCCATTCCCTCCTCTTGCCACCTGTTGAGGAAGGCACTCTCCAC  
CTGCTTTGCAGGCGTGGGCTCTCAATGTGTCCAAGAATCACAGTCAGAGCTGAAGGGC  
CCTTGGAATCATTATTGCAGCA

>2082

TCCTCTTGCCACCTGTTGAGGAAGGCACTCTCCACCTGCTTTGCAGGCGTGGGCTCTC  
AATGTGTCCAAGAATCACAGTCAGAGCTGAAGGGCCCTTGGAATCATTATTGCAGCAT  
GCTCATTTGGGAGGAGTAAGTGG

>2083

CCACCTGTTGAGGAAGGCACTCTCCACCTGCTTTGCAGGCGTGGGCTCTCAATGTGTC  
CAAGAATCACAGTCAGAGCTGAAGGGCCCTTGGAATCATTATTGCAGCATGCTCATTT  
GGGAGGAGTAAGTGGAGGTCCAG

>2084

AGGCGTGGGCTCTCAATGTGTCCAAGAATCACAGTCAGAGCTGAAGGGCCCTTGGAAT  
CATTTATTGCAGCATGCTCATTTGGGAGGAGTAAGTGGAGGTCCAGAGAGGTTCTGTG  
ATTTCCCTAGGTCACACAGCAAG

>2085

TGTGTCCAAGAATCACAGTCAGAGCTGAAGGGCCCTTGGAATCATTATTGCAGCATG  
CTCATTTGGGAGGAGTAAGTGGAGGTCCAGAGAGGTTCTGTGATTTCCCTAGGTCAC  
ACAGCAAGCTAGAGGCAAAACCAG

>2086

TCACAGTCAGAGCTGAAGGGCCCTTGGAATCATTATTGCAGCATGCTCATTTGGGAGG  
AGTAAGTGGAGGTCCAGAGAGGTTCTGTGATTTCCCTAGGTCACACAGCAAGCTAGA  
GGCAAAACCAGGACCCTCACTCC

>2087

TCATTATTGCAGCATGCTCATTTGGGAGGAGTAAGTGGAGGTCCAGAGAGGTTCTGT  
GATTTCCCTAGGTCACACAGCAAGCTAGAGGCAAAACCAGGACCCTCACTCCCAGCC  
CACTTTAATTCTTCCTTCACAAGC

>2088

GCAGCATGCTCATTTGGGAGGAGTAAGTGGAGGTCCAGAGAGGTTCTGTGATTTCCC  
TAGGTCACACAGCAAGCTAGAGGCAAAACCAGGACCCTCACTCCCAGCCCACTTTAAT  
TCTTCCTTCACAAGCCTGCCTGTG

>2089

CTCATTTGGGAGGAGTAAGTGGAGGTCCAGAGAGGTTCTGTGATTTCCCTAGGTCAC  
ACAGCAAGCTAGAGGCAAAACCAGGACCCTCACTCCCAGCCCACTTTAATTCTTCCTT  
CACAAGCCTGCCTGTGACTGCCCCA

>2090

CAGAGAGGTTCTGTGATTTCCCTAGGTCACACAGCAAGCTAGAGGCAAAACCAGGA  
CCCTCACTCCCAGCCCACTTTAATTCTTCCTTCACAAGCCTGCCTGTGACTGCCAGGT  
CTGTTCTCTGCTTCTACCAAGGGG

>2091

GGTCACACAGCAAGCTAGAGGCCAAAACCAGGACCCTCACTCCCAGCCCACCTTTAATTC  
TTCCTTCACAAGCCTGCCTGTGACTGCCCAGGTCTGTTCTCTGCTTCTACCAAGGGGTA  
GGCAAGACTAGAATCTGACTTGA

>2092

GGCAAAACCAGGACCCTCACTCCCAGCCCACCTTTAATTCTTCCTTCACAAGCCTGCCT  
GTGACTGCCCAGGTCTGTTCTCTGCTTCTACCAAGGGGTAGGCAAGACTAGAATCTGA  
CTTGAGAGCAGTTTCAGATCTTTG

>2093

CAGCCCACCTTTAATTCTTCCTTCACAAGCCTGCCTGTGACTGCCCAGGTCTGTTCTCTG  
CTTCTACCAAGGGGTAGGCAAGACTAGAATCTGACTTGAGAGCAGTTTCAGATCTTTG  
TCTGTGAGGGATGCTGGGGGGTT

>2094

ACTTTAATTCTTCCTTCACAAGCCTGCCTGTGACTGCCCAGGTCTGTTCTCTGCTTCTAC  
CAAGGGGTAGGCAAGACTAGAATCTGACTTGAGAGCAGTTTCAGATCTTTGTCTGTGA  
GGGATGCTGGGGGGTTTCTGGC

>2095

AATTCCTTCCTTCACAAGCCTGCCTGTGACTGCCCAGGTCTGTTCTCTGCTTCTACCAAG  
GGGTAGGCAAGACTAGAATCTGACTTGAGAGCAGTTTCAGATCTTTGTCTGTGAGGGA  
TGCTGGGGGGTTTCTGGCATGGT

>2096

TTCCTTCACAAGCCTGCCTGTGACTGCCCAGGTCTGTTCTCTGCTTCTACCAAGGGGTA  
GGCAAGACTAGAATCTGACTTGAGAGCAGTTTCAGATCTTTGTCTGTGAGGGATGCTG  
GGGGGTTTCTGGCATGGTGACTT

>2097

CTGCCTGTGACTGCCCAGGTCTGTTCTCTGCTTCTACCAAGGGGTAGGCAAGACTAGA  
ATCTGACTTGAGAGCAGTTTCAGATCTTTGTCTGTGAGGGATGCTGGGGGGTTTCTGGC  
ATGGTGACTTGCCCTCCTGGGACA

>2098

TCTGCTTCTACCAAGGGGTAGGCAAGACTAGAATCTGACTTGAGAGCAGTTTCAGATC  
TTTGTCTGTGAGGGATGCTGGGGGGTTTCTGGCATGGTGACTTGCCCTCCTGGGACACT  
CATTAACCTCTCTGCTGCTGAGCC

>2099

GCTGGGGGGTTTCTGGCATGGTGACTTGCCCTCCTGGGACACTCATTAACCTCTCTGCTG  
CTGAGCCTGAGCAGACTAATGTACATCAACTCCTTAGGATTTACAGACAATGCCCTATG  
TTGGGGGTTTTGAGACCCAAAG

>2100

GGGGGGTTTCTGGCATGGTGACTTGCCCTCCTGGGACACTCATTAACCTCTCTGCTGCTG  
AGCCTGAGCAGACTAATGTACATCAACTCCTTAGGATTTACAGACAATGCCCTATGTTG  
GGGGTTTTGAGACCCAAAGATT

>2101

TGCCTCCTGGGACACTCATTAACCTCTCTGCTGCTGAGCCTGAGCAGACTAATGTACAT  
CAACTCCTTAGGATTTACAGACAATGCCCTATGTTGGGGGTTTTGAGACCCAAAGATTG  
CTAAGACATGGGACTTTTCCTT

>2102

AGCCTGAGCAGACTAATGTACATCAACTCCTTAGGATTTACAGACAATGCCCTATGTTG  
GGGGTTTTGAGACCCAAAGATTGCTAAGACATGGGACTTTTCCTTGAAGAGCTTATACT  
TTGAGTTAAAATATGTATGTTG

>2103

CAGACTAATGTACATCAACTCCTTAGGATTTACAGACAATGCCCTATGTTGGGGGTTTT  
GAGACCCAAAGATTGCTAAGACATGGGACTTTTCCTTGAAGAGCTTATACTTTGAGTTA  
AAATATGTATGTTGATATCTAT

>2104

GTACATCAACTCCTTAGGATTTACAGACAATGCCCTATGTTGGGGGTTTTGAGACCCAA  
AGATTGCTAAGACATGGGACTTTTCCTTGAAGAGCTTATACTTTGAGTTAAAATATGTAT  
GTTGATATCTATGACAGAGAA

>2105

ATGTTGGGGGTTTTGAGACCCAAAGATTGCTAAGACATGGGACTTTTCCTTGAAGAGC  
TTATACTTTGAGTTAAAATATGTATGTTGATATCTATGACAGAGAATAGGAAATGGAAAG  
ACTATGATATATATATTCAGAG

>2106

TAAGACATGGGACTTTTCCTTGAAGAGCTTATACTTTGAGTTAAAATATGTATGTTGATA  
TCTATGACAGAGAATAGGAAATGGAAAGACTATGATATATATATTCAGAGTTGAAATGA  
CTTCTGTCTGGAGTGATTCAT

>2107

AGACATGGGACTTTTCCTTGAAGAGCTTATACTTTGAGTTAAAATATGTATGTTGATATC  
TATGACAGAGAATAGGAAATGGAAAGACTATGATATATATATTCAGAGTTGAAATGACTT  
CTGTCTGGAGTGATTCATT

>2108

AGTTAAAATATGTATGTTGATATCTATGACAGAGAATAGGAAATGGAAAGACTATGATAT  
ATATATTCAGAGTTGAAATGACTTCTGTCTGGAGTGATTCATTTTAAATTTTAAAACCTT  
GTTGAGCACTTACTGTCTGC

>2109

TAAAATATGTATGTTGATATCTATGACAGAGAATAGGAAATGGAAAGACTATGATATATA  
TATTCAGAGTTGAAATGACTTCTGTCTGGAGTGATTCATTTTAAATTTTAAAACCTTGTT  
GAGCACTTACTGTCTGCTG

>2110

TATGACAGAGAATAGGAAATGGAAAGACTATGATATATATATTCAGAGTTGAAATGACTT  
CTGTCTGGAGTGATTCATTTTAAATTTTAAAACCTTGTTGAGCACTTACTGTCTGCTGGG  
CACCTGGGTAGGCCCTGGGA

>2111

ATATATATATTCAGAGTTGAAATGACTTCTGTCTGGAGTGATTCATTTTAAATTTTAAAAC  
CTTGTTGAGCACTTACTGTCTGCTGGGCACCTGGGTAGGCCCTGGGAATACTGTGATGA  
GCAAGATAGACAAGACGTCT

>2112

TGTCTGGAGTGATTCATTTTAAATTTTAAAACCTTGTTGAGCACTTACTGTCTGCTGGGC  
ACCTGGGTAGGCCCTGGGAATACTGTGATGAGCAAGATAGACAAGACGTCTACCCTCC  
TGGGGCTTTCCTAATGGGGAAG

>2113

ATTTTAAAACCTTGTTGAGCACTTACTGTCTGCTGGGCACCTGGGTAGGCCCTGGGAAT  
ACTGTGATGAGCAAGATAGACAAGACGTCTACCCTCCTGGGGCTTTCCTAATGGGGAA  
GAAAGATCCTTACTTAGCTAGCA

>2114

ACCTTGTTGAGCACTTACTGTCTGCTGGGCACCTGGGTAGGCCCTGGGAATACTGTGAT  
GAGCAAGATAGACAAGACGTCTACCCTCCTGGGGCTTTCCTAATGGGGAAGAAAGATC  
CTTACTTAGCTAGCAGTCCTGTC

>2115

GTTGAGCACTTACTGTCTGCTGGGCACCTGGGTAGGCCCTGGGAATACTGTGATGAGC  
AAGATAGACAAGACGTCTACCCTCCTGGGGCTTTCCTAATGGGGAAGAAAGATCCTTA  
CTTAGCTAGCAGTCCTGTCCGTAA

>2116

GCCCTGGGAATACTGTGATGAGCAAGATAGACAAGACGTCTACCCTCCTGGGGCTTTC  
CTAATGGGGAAGAAAGATCCTTACTTAGCTAGCAGTCCTGTCCGTAACCTGTGTAAGGGT  
GATTTTGATACATGTTGGGAGCC

>2117

AGCAAGATAGACAAGACGTCTACCCTCCTGGGGCTTTCCTAATGGGGAAGAAAGATCC  
TACTTAGCTAGCAGTCCTGTCCGTAACCTGTGTAAGGGTGATTTTGATACATGTTGGGA  
GCCTGGATGAAGCAGCACATGAG

>2118

AAGATAGACAAGACGTCTACCCTCCTGGGGCTTTCCTAATGGGGAAGAAAGATCCTTA  
CTTAGCTAGCAGTCCTGTCCGTAACCTGTGTAAGGGTGATTTTGATACATGTTGGGAGCC  
TGGATGAAGCAGCACATGAGTAG

>2119

CTCCTGGGGCTTTCCTAATGGGGAAGAAAGATCCTTACTTAGCTAGCAGTCCTGTCCGT  
AACTGTGTAAGGGTGATTTTGATACATGTTGGGAGCCTGGATGAAGCAGCACATGAGT  
AGGATATTAAAGGATAAGTAGGT

>2120

AGAAAGATCCTTACTTAGCTAGCAGTCCTGTCCGTAACCTGTGTAAGGGTGATTTTGATA  
CATGTTGGGAGCCTGGATGAAGCAGCACATGAGTAGGATATTAAAGGATAAGTAGGTTT  
TGAAGACGGGGACAGAAAGAAG

>2121

TACTTAGCTAGCAGTCCTGTCCGTAACCTGTGTAAGGGTGATTTTGATACATGTTGGGAG  
CCTGGATGAAGCAGCACATGAGTAGGATATTAAAGGATAAGTAGGTTTTGAAGACGGG  
GACAGAAAGAAGGAAAATTGTGG

>2122

TTAGCTAGCAGTCCTGTCCGTAACCTGTGTAAGGGTGATTTTGATACATGTTGGGAGCCT  
GGATGAAGCAGCACATGAGTAGGATATTAAAGGATAAGTAGGTTTTGAAGACGGGGAC  
AGAAAGAAGGAAAATTGTGGTCA

>2123

CAGTCCTGTCCGTAACCTGTGTAAGGGTGATTTTGATACATGTTGGGAGCCTGGATGAAG  
CAGCACATGAGTAGGATATTAAAGGATAAGTAGGTTTTGAAGACGGGGACAGAAAGAA  
GGAAAATTGTGGTCAGGGCCAGG

>2124

AACTGTGTAAGGGTGATTTTGATACATGTTGGGAGCCTGGATGAAGCAGCACATGAGT  
AGGATATTAAAGGATAAGTAGGTTTTGAAGACGGGGACAGAAAGAAGGAAAATTGTG  
GTCAGGGCCAGGGGAGAAAACAAGG

>2125

TTGGGAGCCTGGATGAAGCAGCACATGAGTAGGATATTAAAGGATAAGTAGGTTTTGA  
AGACGGGGACAGAAAGAAGGAAAATTGTGGTCAGGGCCAGGGGAGAAAACAAGGA  
GTAACTTTCTTTGGCAGGAATGAGGGT

>2126

CCTGGATGAAGCAGCACATGAGTAGGATATTAAAGGATAAGTAGGTTTTGAAGACGGG  
GACAGAAAGAAGGAAAATTGTGGTCAGGGCCAGGGGAGAAAACAAGGAGTAACTTT  
CTTTGGCAGGAATGAGGGTGATTCAT

>2127

ACATGAGTAGGATATTAAAGGATAAGTAGGTTTTGAAGACGGGGACAGAAAGAAGGA  
AAATTGTGGTCAGGGCCAGGGGAGAAAACAAGGAGTAACTTTCTTTGGCAGGAATGA  
GGGTGATTCATGCTGGAATGGTAGGC

>2128

GTAGGATATTAAAGGATAAGTAGGTTTTGAAGACGGGGACAGAAAGAAGGAAAATTGT  
GGTCAGGGCCAGGGGAGAAAACAAGGAGTAACTTTCTTTGGCAGGAATGAGGGTGAT  
TCATGCTGGAATGGTAGGCTGGGGT

>2129

ACGGGGACAGAAAGAAGGAAAATTGTGGTCAGGGCCAGGGGAGAAAACAAGGAGTA  
ACTTTCTTTGGCAGGAATGAGGGTGATTCATGCTGGAATGGTAGGCTGGGGTCAGACT  
GTGGTGCTATAAATGCGGGGAGAGAG

>2130

CAGAAAGAAGGAAAATTGTGGTCAGGGCCAGGGGAGAAAACAAGGAGTAACTTTCTT  
TGGCAGGAATGAGGGTGATTCATGCTGGAATGGTAGGCTGGGGTCAGACTGTGGTGCT  
ATAAATGCGGGGAGAGAGATTAGAG

>2131

AGGGCCAGGGGAGAAAACAAGGAGTAACTTTCTTTGGCAGGAATGAGGGTGATTCAT  
GCTGGAATGGTAGGCTGGGGTCAGACTGTGGTGCTATAAATGCGGGGAGAGAGATTAG  
AGAAGGCAGCATGAAGAATGGAGAG

>2132

AGAAAACAAGGAGTAACTTTCTTTGGCAGGAATGAGGGTGATTCATGCTGGAATGGTA  
GGCTGGGGTCAGACTGTGGTGCTATAAATGCGGGGAGAGAGATTAGAGAAGGCAGCA  
TGAAGAATGGAGAGAAAATGAGTTT

>2133

GCAGGAATGAGGGTGATTCATGCTGGAATGGTAGGCTGGGGTCAGACTGTGGTGCTAT  
AAATGCGGGGAGAGAGATTAGAGAAGGCAGCATGAAGAATGGAGAGAAAATGAGTTT  
GAAGTTGAGCAGACCCGGGTTTCAGA

>2134

AGGAATGAGGGTGATTCATGCTGGAATGGTAGGCTGGGGTCAGACTGTGGTGCTATAA  
ATGCGGGGAGAGAGATTAGAGAAGGCAGCATGAAGAATGGAGAGAAAATGAGTTTGA  
AGTTGAGCAGACCCGGGTTTCAGATT



>2135

GAATGAGGGTGATTCATGCTGGAATGGTAGGCTGGGGTCAGACTGTGGTGCTATAAAT  
GCGGGGAGAGAGATTAGAGAAGGCAGCATGAAGAATGGAGAGAAAATGAGTTTGAA  
GTTGAGCAGACCCGGGTTTCAGATTTT

>2136

AGGGTGATTCATGCTGGAATGGTAGGCTGGGGTCAGACTGTGGTGCTATAAATGCGGG  
GAGAGAGATTAGAGAAGGCAGCATGAAGAATGGAGAGAAAATGAGTTTGAAGTTGAG  
CAGACCCGGGTTTCAGATTTTCATGC

>2137

GAATGGTAGGCTGGGGTCAGACTGTGGTGCTATAAATGCGGGGAGAGAGATTAGAGAA  
GGCAGCATGAAGAATGGAGAGAAAATGAGTTTGAAGTTGAGCAGACCCGGGTTTCAGA  
TTTTTCATGCTGCCACTTGCAAACCTG

>2138

TGGTGCTATAAATGCGGGGAGAGAGATTAGAGAAGGCAGCATGAAGAATGGAGAGAA  
AATGAGTTTGAAGTTGAGCAGACCCGGGTTTCAGATTTTCATGCTGCCACTTGCAAACCT  
GTGTGATGTTGGCCATCAAGGACTG

>2139

GAGAGATTAGAGAAGGCAGCATGAAGAATGGAGAGAAAATGAGTTTGAAGTTGAGCA  
GACCCGGGTTTCAGATTTTCATGCTGCCACTTGCAAACCTGTGTGATGTTGGCCATCAAGG  
ACTGTGAACTGGCTGGGTGCAGTG

>2140

TGAAGTTGAGCAGACCCGGGTTTCAGATTTTCATGCTGCCACTTGCAAACCTGTGTGATG  
TTGGCCATCAAGGACTGTGAACTGGCTGGGTGCAGTGGCTCACACCTGTCATCCCAGT  
GCTTTGGGAGGCCAAGGCAGGAGG

>2141

AGATTTTCATGCTGCCACTTGCAAACCTGTGTGATGTTGGCCATCAAGGACTGTGAACTG  
GCTGGGTGCAGTGGCTCACACCTGTCATCCCAGTGCTTTGGGAGGCCAAGGCAGGAG  
GATTGCGTGAGGCCAGAAGTTTGA

>2142

AAACTGTGTGATGTTGGCCATCAAGGACTGTGAACTGGCTGGGTGCAGTGGCTCACAC  
CTGTCATCCCAGTGCTTTGGGAGGCCAAGGCAGGAGGATTGCGTGAGGCCAGAAGTT  
TGAGACTGGCTTGGGCAATATAGCG

>2143

CAAGGACTGTGAACTGGCTGGGTGCAGTGGCTCACACCTGTCATCCCAGTGCTTTGGG  
AGGCCAAGGCAGGAGGATTGCGTGAGGCCAGAAGTTTGAGACTGGCTTGGGCAATAT  
AGCGAGACGATCTTTCCAAAAAAAAA

>2144

GGACTGTGAACTGGCTGGGTGCAGTGGCTCACACCTGTCATCCCAGTGCTTTGGGAGG  
CCAAGGCAGGAGGATTGCGTGAGGCCAGAAGTTTGAGACTGGCTTGGGCAATATAGC  
GAGACGATCTTTCCAAAAAAAAAAAAA

>2145

TGGCTGGGTGCAGTGGCTCACACCTGTCATCCCAGTGCTTTGGGAGGCCAAGGCAGG  
AGGATTGCGTGAGGCCAGAAGTTTGAGACTGGCTTGGGCAATATAGCGAGACGATCTT  
TCCAAAAAAAAAAAAAAAAAAAAATTA

>2146  
TGCAGTGGCTCACACCTGTCATCCCAGTGCTTTGGGAGGCCAAGGCAGGAGGATTGCG  
TGAGGCCAGAAGTTTGAGACTGGCTTGGGCAATATAGCGAGACGATCTTTCCAAAAA  
AAAAAAAAAAAAAATTAAAAATGCA  
>2147  
AGTGCTTTGGGAGGCCAAGGCAGGAGGATTGCGTGAGGCCAGAAGTTTGAGACTGGC  
TTGGGCAATATAGCGAGACGATCTTTCCAAAAAAAAAAAAAAAAAAAAAATTAAAAATGCA  
GCTGTGCATGCCATAATCCCAGCT  
>2148  
TTGAGACTGGCTTGGGCAATATAGCGAGACGATCTTTCCAAAAAAAAAAAAAAAAAAAA  
ATTAAAAATGCAGCTGTGCATGCCATAATCCCAGCTTCTCGGGTGGCTGAAGAGGGA  
GGATGGCTTGAAC TTATAAGTTCAA  
>2149  
AGCGAGACGATCTTTCCAAAAAAAAAAAAAAAAAAAAAATTAAAAATGCAGCTGTGCATG  
CCCATAATCCCAGCTTCTCGGGTGGCTGAAGAGGGAGGATGGCTTGAAC TTATAAGTTC  
AAGGCTGTGGTGAGCTATGATCAC  
>2150  
AAAAAAAAAAAAAAAAAAAAAATTAAAAATGCAGCTGTGCATGCCATAATCCCAGCTTCTC  
GGGTGGCTGAAGAGGGAGGATGGCTTGAAC TTATAAGTTCAAGGCTGTGGTGAGCTAT  
GATCACGCCACTGCACTCCAGCCT  
>2151  
AAAAAAAAAAAAAAAAAAAAAATTAAAAATGCAGCTGTGCATGCCATAATCCCAGCTTCTCGG  
GTGGCTGAAGAGGGAGGATGGCTTGAAC TTATAAGTTCAAGGCTGTGGTGAGCTATGA  
TCACGCCACTGCACTCCAGCCTGG  
>2152  
TGCAGCTGTGCATGCCATAATCCCAGCTTCTCGGGTGGCTGAAGAGGGAGGATGGCT  
TGAAC TTATAAGTTCAAGGCTGTGGTGAGCTATGATCACGCCACTGCACTCCAGCCTGG  
GCAACAAAGTGAGACCCTATCTC  
>2153  
AAGAGGGAGGATGGCTTGAAC TTATAAGTTCAAGGCTGTGGTGAGCTATGATCACGCC  
ACTGCACTCCAGCCTGGGCAACAAAGTGAGACCCTATCTCTATTTCAAACAACAACA  
ACAACAACAGCAACACACACCATG  
>2154  
CTTGAAC TTATAAGTTCAAGGCTGTGGTGAGCTATGATCACGCCACTGCACTCCAGCCT  
GGGCAACAAAGTGAGACCCTATCTCTATTTCAAACAACAACAACAACAACAGCAAC  
ACACACCATGAACTGTAGCTTCTT  
>2155  
CCACTGCACTCCAGCCTGGGCAACAAAGTGAGACCCTATCTCTATTTCAAACAACAAC  
CAACAACAACAGCAACACACACCATGAACTGTAGCTTCTTCATTCCTACAGTGCAGTT  
ATTGTGTGGGATAGCCTGAGGATT  
>2156  
ACAAAGTGAGACCCTATCTCTATTTCAAACAACAACAACAACAACAGCAACACACA  
CCATGAACTGTAGCTTCTTCATTCCTACAGTGCAGTTATTGTGTGGGATAGCCTGAGGA  
TTTGGGGTCGTGTACTTAACACAC

>2157

TTTCAAAACAACAACAACAACAGCAACACACACCATGAACTGTAGCTTCTTCATT  
CCTACAGTGCAGTTATTGTGTGGGATAGCCTGAGGATTTGGGGTCGTGTACTTAACACA  
CTCTGCACAGTGCCTGTAACAGT

>2158

ACAACAACAGCAACACACACCATGAACTGTAGCTTCTTCATTCTTACAGTGCAGTTATT  
GTGTGGGATAGCCTGAGGATTTGGGGTCGTGTACTTAACACACTCTGCACAGTGCCTGT  
AACAGTGTAGTTGCTCAATAAA

>2159

ACAGCAACACACACCATGAACTGTAGCTTCTTCATTCTTACAGTGCAGTTATTGTGTGG  
GATAGCCTGAGGATTTGGGGTCGTGTACTTAACACACTCTGCACAGTGCCTGTAACAG  
TGAGTTGCTCAATAAATATAAC

>2160

TCCTACAGTGCAGTTATTGTGTGGGATAGCCTGAGGATTTGGGGTCGTGTACTTAACAC  
ACTCTGCACAGTGCCTGTAACAGTGTAGTTGCTCAATAAATATAACTGCTGTTTGTTTTA  
ACTGCTGTTTCTTTTTGGACT

>2161

GTTATTGTGTGGGATAGCCTGAGGATTTGGGGTCGTGTACTTAACACACTCTGCACAGT  
GCCTGTAACAGTGTAGTTGCTCAATAAATATAACTGCTGTTTGTTTTAACTGCTGTTTCT  
TTTTGGACTTTATCCCGGGAG

>2162

TGTGTGGGATAGCCTGAGGATTTGGGGTCGTGTACTTAACACACTCTGCACAGTGCCT  
GTAACAGTGTAGTTGCTCAATAAATATAACTGCTGTTTGTTTTAACTGCTGTTTCTTTTT  
GGACTTTATCCCGGGAGAGTTG

>2163

TGTAGTTGCTCAATAAATATAACTGCTGTTTGTTTTAACTGCTGTTTCTTTTTGGACTTTA  
TCCCGGGAGAGTTGGAGCCTTGGAAGGCATTTGAAAAGGAGAGTGACGTGACTGGAG  
TGCTCCATACTGATGTGACATC

>2164

TAGTTGCTCAATAAATATAACTGCTGTTTGTTTTAACTGCTGTTTCTTTTTGGACTTTATC  
CCGGGAGAGTTGGAGCCTTGGAAGGCATTTGAAAAGGAGAGTGACGTGACTGGAGTG  
CTCCATACTGATGTGACATCCA

>2165

TTGTTTTAACTGCTGTTTCTTTTTGGACTTTATCCCGGGAGAGTTGGAGCCTTGGAAGG  
CATTTGAAAAGGAGAGTGACGTGACTGGAGTGCTCCATACTGATGTGACATCCACTAG  
GCATGTGTCTGACTGCCCCCTGC

>2166

TTTTTGGACTTTATCCCGGGAGAGTTGGAGCCTTGGAAGGCATTTGAAAAGGAGAGTG  
ACGTGACTGGAGTGCTCCATACTGATGTGACATCCACTAGGCATGTGTCTGACTGCCCC  
CTGCTCCTTCCCTGCCTTCACGA

>2167

AGCCTTGGAAGGCATTTGAAAAGGAGAGTGACGTGACTGGAGTGCTCCATACTGATGT  
GACATCCACTAGGCATGTGTCTGACTGCCCCCTGCTCCTTCCCTGCCTTCACGAGCCTG  
TCTGAAAAGGAGTTTAGTGCGTG

>2168

GCTCCATACTGATGTGACATCCACTAGGCATGTGTCTGACTGCCCCCTGCTCCTTCCCT  
GCCTTCACGAGCCTGTCTGAAAAGGAGTTTAGTGCGTGATCATCAGCTCCTAAGGAGA  
CCTCTCCCCTGTATCTTGTACCT

>2169

GTGACATCCACTAGGCATGTGTCTGACTGCCCCCTGCTCCTTCCCTGCCTTCACGAGCC  
TGTCTGAAAAGGAGTTTAGTGCGTGATCATCAGCTCCTAAGGAGACCTCTCCCCTGTAT  
CTTGTACCTGGCACTCTACCAA

>2170

CTGACTGCCCCCTGCTCCTTCCCTGCCTTCACGAGCCTGTCTGAAAAGGAGTTTAGTG  
CGTGATCATCAGCTCCTAAGGAGACCTCTCCCCTGTATCTTGTACCTGGCACTCTACCA  
AGATTTGATGAAAGGACATGAAA

>2171

CCCCTGCTCCTTCCCTGCCTTCACGAGCCTGTCTGAAAAGGAGTTTAGTGCGTGATCAT  
CAGCTCCTAAGGAGACCTCTCCCCTGTATCTTGTACCTGGCACTCTACCAAGATTTGAT  
GAAAGGACATGAAATGGACCCT

>2172

CTGCTCCTTCCCTGCCTTCACGAGCCTGTCTGAAAAGGAGTTTAGTGCGTGATCATCAG  
CTCCTAAGGAGACCTCTCCCCTGTATCTTGTACCTGGCACTCTACCAAGATTTGATGAA  
AGGACATGAAATGGACCCTTGC

>2173

AGTTTAGTGCGTGATCATCAGCTCCTAAGGAGACCTCTCCCCTGTATCTTGTACCTGGC  
ACTCTACCAAGATTTGATGAAAGGACATGAAATGGACCCTTGCCACCTCTCGGTGGGC  
GGGGAAGCTGGGAGAGGGGCCTG

>2174

GATCATCAGCTCCTAAGGAGACCTCTCCCCTGTATCTTGTACCTGGCACTCTACCAAGA  
TTTGATGAAAGGACATGAAATGGACCCTTGCCACCTCTCGGTGGGCGGGGAAGCTGG  
GAGAGGGGCCTGGGGAGAGGGGGT

>2175

CTGGCACTCTACCAAGATTTGATGAAAGGACATGAAATGGACCCTTGCCACCTCTCGG  
TGGGCGGGGAAGCTGGGAGAGGGGCCTGGGGAGAGGGGGTCTTCAGCTGTCAGGAT  
CAAAGGAAGTGACACTCTGAAGCTGG

>2176

TCTACCAAGATTTGATGAAAGGACATGAAATGGACCCTTGCCACCTCTCGGTGGGCGG  
GGAAGCTGGGAGAGGGGCCTGGGGAGAGGGGGTCTTCAGCTGTCAGGATCAAAGGA  
AGTGACACTCTGAAGCTGGTCTGCCG

>2177

AAATGGACCCTTGCCACCTCTCGGTGGGCGGGGAAGCTGGGAGAGGGGCCTGGGGAG  
AGGGGGTCTTCAGCTGTCAGGATCAAAGGAAGTGACACTCTGAAGCTGGTCTGCCGG  
ACTGTTACCCGTCTCTCTAACTCTCT

>2178

CCCTTGCCACCTCTCGGTGGGCGGGGAAGCTGGGAGAGGGGCCTGGGGAGAGGGGG  
TCTTCAGCTGTCAGGATCAAAGGAAGTGACACTCTGAAGCTGGTCTGCCGGACTGTTA  
CCCGTCTCTCTAACTCTCTTTTAATA

>2179

CTCGGTGGGCGGGGAAGCTGGGAGAGGGGCCTGGGGAGAGGGGGTCTTCAGCTGTC  
AGGATCAAAGGAAGTGACACTCTGAAGCTGGTCTGCCGGACTGTTACCCGTCTCTCTA  
ACTCTCTTTTAATAGAAACCCAGTCT

>2180

ATCAAAGGAAGTGACACTCTGAAGCTGGTCTGCCGGACTGTTACCCGTCTCTCTAACT  
CTCTTTTAATAGAAACCCAGTCTCCCCCTTTGCCTCCCTGATAGTGAACAGCGACGCTA  
TCTCCCGCGGGCCAGTCTCGGCT

>2181

AAGTGACACTCTGAAGCTGGTCTGCCGGACTGTTACCCGTCTCTCTAACTCTCTTTTAA  
TAGAAACCCAGTCTCCCCCTTTGCCTCCCTGATAGTGAACAGCGACGCTATCTCCCGCG  
GGCCAGTCTCGGCTGTGGTCGT

>2182

CCGGACTGTTACCCGTCTCTCTAACTCTCTTTTAATAGAAACCCAGTCTCCCCCTTTGCC  
TCCCTGATAGTGAACAGCGACGCTATCTCCCGCGGGCCAGTCTCGGCTGTGGTCGTAG  
CACTACGCAATGTCTGCAAACC

>2183

GTTACCCGTCTCTCTAACTCTCTTTTAATAGAAACCCAGTCTCCCCCTTTGCCTCCCTGA  
TAGTGAACAGCGACGCTATCTCCCGCGGGCCAGTCTCGGCTGTGGTCGTAGCACTACG  
CAATGTCTGCAAACCGACAGTG

>2184

TTTAATAGAAACCCAGTCTCCCCCTTTGCCTCCCTGATAGTGAACAGCGACGCTATCTC  
CCGCGGGCCAGTCTCGGCTGTGGTCGTAGCACTACGCAATGTCTGCAAACCGACAGTG  
GCATGGGGAGATAAGGGCCCCAA

>2185

TCCCCTCTTGCTCCCTGATAGTGAACAGCGACGCTATCTCCCGCGGGCCAGTCTCGGC  
TGTGGTCGTAGCACTACGCAATGTCTGCAAACCGACAGTGGCATGGGGAGATAAGGGC  
CCCAACGTTGTGTAACGAGGGGC

>2186

AGCGACGCTATCTCCCGCGGGCCAGTCTCGGCTGTGGTCGTAGCACTACGCAATGTCT  
GCAAACCGACAGTGGCATGGGGAGATAAGGGCCCCAACGTTGTGTAACGAGGGGCAT  
GGGCTGTTTGCCCGAGTGGCTCCTG

>2187

TCCCGCGGGCCAGTCTCGGCTGTGGTCGTAGCACTACGCAATGTCTGCAAACCGACAG  
TGGCATGGGGAGATAAGGGCCCCAACGTTGTGTAACGAGGGGCATGGGCTGTTTGCCC  
GAGTGGCTCCTGGCCCCTGGGTAA

>2188

GTAGCACTACGCAATGTCTGCAAACCGACAGTGGCATGGGGAGATAAGGGCCCCAAC  
GTTGTGTAACGAGGGGCATGGGCTGTTTGCCCGAGTGGCTCCTGGCCCCTGGGTAACT  
GCTAACCTCAACGGAGGAGCGGGCC

>2189

AACCGACAGTGGCATGGGGAGATAAGGGCCCCAACGTTGTGTAACGAGGGGCATGGG  
CTGTTTGCCCGAGTGGCTCCTGGCCCCTGGGTAACTGCTAACCTCAACGGAGGAGCGG  
GCCGGCCTTGGAACGCCGTTCCAG

>2190

TGTAACGAGGGGCATGGGCTGTTTGTCCCGAGTGGCTCCTGGCCCCTGGGTAACTGCTA  
ACCTCAACGGAGGAGCGGGCCGGCCTTGGAACGCCGTTCCAGGGCCCCTCGCTGGT  
TCCACGGATGCCTTTTTGTGGTTGG

>2191

TGGCTCCTGGCCCCTGGGTAACTGCTAACCTCAACGGAGGAGCGGGCCGGCCTTGGA  
AACGCCGTTCCAGGGCCCCTCGCTGGTTCACGGATGCCTTTTTGTGGTTGGATAAAG  
GAAGCTCATGTAGGCCGCCACAGC

>2192

GCCGGCCTTGGAACGCCGTTCCAGGGCCCCTCGCTGGTTCACGGATGCCTTTTTGT  
GGTTGGATAAAGGAAGCTCATGTAGGCCGCCACAGCGCAGCATGGCCTTGGGCTACG  
GGTGTGTTGGTTGTTTTGTTTTCT

>2193

GCCTTGGAACGCCGTTCCAGGGCCCCTCGCTGGTTCACGGATGCCTTTTTGTGGTT  
GGATAAAGGAAGCTCATGTAGGCCGCCACAGCGCAGCATGGCCTTGGGCTACGGGTG  
TTTGGTTGTTTTGTTTTCTCTT

>2194

GGGCCCCCTCGCTGGTTCACGGATGCCTTTTTGTGGTTGGATAAAGGAAGCTCATGTAG  
GCCGCCACAGCGCAGCATGGCCTTGGGCTACGGGTGTTTGGTTGTTTTGTTTTCTCT  
TTTCTTTGTCTTTTTTAAAAAA

>2195

CAGCATGGCCTTGGGCTACGGGTGTTTGGTTGTTTTGTTTTCTCTTTTCTTTGTCTTTT  
TAAAAAAAGAAGTTGAAAGGGGGATAGTCTTGCTTGGCACCTACCACCTTTAACCCA  
AAACCAAATAAAACAAACAGTT

>2196

CATGGCCTTGGGCTACGGGTGTTTGGTTGTTTTGTTTTCTCTTTTCTTTGTCTTTTTTAA  
AAAAAGAAGTTGAAAGGGGGATAGTCTTGCTTGGCACCTACCACCTTTAACCCAAAAC  
CAAATAAAACAAACAGTTCCT

>2197

CGGGTGTTTGGTTGTTTTGTTTTCTCTTTTCTTTGTCTTTTTTAAAAAAGAAGTTGAA  
AGGGGGATAGTCTTGCTTGGCACCTACCACCTTTAACCCAAAACCAAATAAAACAAAC  
AGTTCCTAAATATAAATTAAAC

>2198

AGAAGTTGAAAGGGGGATAGTCTTGCTTGGCACCTACCACCTTTAACCCAAAACCAAA  
TAAACAAACAGTTCCTAAATATAAATTAACTTCAACCTGCAGTATAGACATCCTCCTT  
CCCTGCCCCGAAACCCACTGGCC

>2199

CCTACCACCTTTAACCCAAAACCAAATAAAACAAACAGTTCCTAAATATAAATTAACT  
TCAACCTGCAGTATAGACATCCTCCTTCCCTGCCCGAAACCCACTGGCCACTGGAGGCT  
AGCTTTAAGAAATTGGTTTTGG

>2200

CACCTTTAACCCAAAACCAAATAAAACAAACAGTTCCTAAATATAAATTAACTTCAAC  
CTGCAGTATAGACATCCTCCTTCCCTGCCCGAAACCCACTGGCCACTGGAGGCTAGCTT  
TAAGAAATTGGTTTTGGAGACT

>2201

ATATAAATTAACTTCAACCTGCAGTATAGACATCCTCCTTCCCTGCCCCGAAACCCACT  
GGCCACTGGAGGCTAGCTTTAAGAAATTGGTTTTTGGAGACTCTGGCTTGAAAAGGAGC  
CATGCCCACTTGTCTCACGTCCC

>2202

AATTAACTTCAACCTGCAGTATAGACATCCTCCTTCCCTGCCCCGAAACCCACTGGCCA  
CTGGAGGCTAGCTTTAAGAAATTGGTTTTTGGAGACTCTGGCTTGAAAAGGAGCCATGC  
CCTTGTCTCACGTCCCAGTCG

>2203

TAGACATCCTCCTTCCCTGCCCCGAAACCCACTGGCCACTGGAGGCTAGCTTTAAGAAA  
TTGGTTTTTGGAGACTCTGGCTTGAAAAGGAGCCATGCCCACTTGTCTCACGTCCCAGT  
CGCTGGCTCCAGGGGGGCCGTGGTA

>2204

TAGCTTTAAGAAATTGGTTTTTGGAGACTCTGGCTTGAAAAGGAGCCATGCCCACTTGT  
CTCACGTCCCAGTCGCTGGCTCCAGGGGGGCCGTGGTAGAACATATATTGTACTTCAGCT  
GCCTTTCCCTCCAAGCTTCCTC

>2205

TTGGTTTTTGGAGACTCTGGCTTGAAAAGGAGCCATGCCCACTTGTCTCACGTCCCAGT  
CGCTGGCTCCAGGGGGGCCGTGGTAGAACATATATTGTACTTCAGCTGCCTTTCCCTCC  
AAGCTTCCTCAGCCACCCACAGC

>2206

CATGCCCACTTGTCTCACGTCCCAGTCGCTGGCTCCAGGGGGGCCGTGGTAGAACATATA  
TTGTACTTCAGCTGCCTTTCCCTCCAAGCTTCCTCAGCCACCCACAGCCCTTTCAGAT  
GAGCTGAGCCCTAGCACTGTGC

>2207

GTCCCAGTCGCTGGCTCCAGGGGGGCCGTGGTAGAACATATATTGTACTTCAGCTGCCTT  
TCCCTCCAAGCTTCCTCAGCCACCCACAGCCCTTTCAGATGAGCTGAGCCCTAGCAC  
TGTGCCCTCTCCCTCTGCCCTC

>2208

GGGGGCCGTGGTAGAACATATATTGTACTTCAGCTGCCTTTCCCTCCAAGCTTCCTCA  
GCCACCCACAGCCCTTTCAGATGAGCTGAGCCCTAGCACTGTGCCCTCTCCCTCTGC  
CCTCTTAGGGTGATAGAATCCAC

>2209

AACATATATTGTACTTCAGCTGCCTTTCCCTCCAAGCTTCCTCAGCCACCCACAGCCC  
TTTCAGATGAGCTGAGCCCTAGCACTGTGCCCTCTCCCTCTGCCCTCTTAGGGTGATA  
GAATCCACTACCCTGACATCTG

>2210

ATATTGTACTTCAGCTGCCTTTCCCTCCAAGCTTCCTCAGCCACCCACAGCCCTTTCAG  
GATGAGCTGAGCCCTAGCACTGTGCCCTCTCCCTCTGCCCTCTTAGGGTGATAGAATC  
CACTACCTGACATCTGGGGTT

>2211

TACTTCAGCTGCCTTTCCCTCCAAGCTTCCTCAGCCACCCACAGCCCTTTCAGATGAG  
CTGAGCCCTAGCACTGTGCCCTCTCCCTCTGCCCTCTTAGGGTGATAGAATCCACTAC  
CCTGACATCTGGGGTTGCCCTG

>2212

CTCAGCCACCCACAGCCCTTTTCAGATGAGCTGAGCCCTAGCACTGTGCCCTCTCCCCT  
CTGCCCTCTTAGGGTGATAGAATCCACTACCCTGACATCTGGGGTTGCCCTGTTCTGCT  
GTGGTGGGAGATGGGCTGGAAGG

>2213

TCTGCCCTCTTAGGGTGATAGAATCCACTACCCTGACATCTGGGGTTGCCCTGTTCTGC  
TGTGGTGGGAGATGGGCTGGAAGGGACTTCGGAGGCTCTCCCGTGTTCTGTACCACCC  
AGCTTCCCCTTGATCCCTCCAC

>2214

GGGTGATAGAATCCACTACCCTGACATCTGGGGTTGCCCTGTTCTGCTGTGGTGGGAGA  
TGGGCTGGAAGGGACTTCGGAGGCTCTCCCGTGTTCTGTACCACCCAGCTTCCCCTTG  
GATCCCTCCACCCCCGCAGCCAG

>2215

TCCACTACCCTGACATCTGGGGTTGCCCTGTTCTGCTGTGGTGGGAGATGGGCTGGAA  
GGGACTTCGGAGGCTCTCCCGTGTTCTGTACCACCCAGCTTCCCCTTGATCCCTCCAC  
CCCCGCAGCCAGGAGAGGGAAGT

>2216

CCTGTTCTGCTGTGGTGGGAGATGGGCTGGAAGGGACTTCGGAGGCTCTCCCGTGTTCT  
TGTACCACCCAGCTTCCCCTTGATCCCTCCACCCCCGCAGCCAGGAGAGGGAAGTAA  
CTGTTCTTTGAGCAGGACATTCA

>2217

GAAGGGACTTCGGAGGCTCTCCCGTGTTCTGTACCACCCAGCTTCCCCTTGATCCCTC  
CACCCCCGCAGCCAGGAGAGGGAAGTAACTGTTCTTTGAGCAGGACATTTCAATTTCA  
AAGTATTCTTGATGCCGCCCCC

>2218

GGACTTCGGAGGCTCTCCCGTGTTCTGTACCACCCAGCTTCCCCTTGATCCCTCCACC  
CCCCGCAGCCAGGAGAGGGAAGTAACTGTTCTTTGAGCAGGACATTTCAATTTCAAAGT  
ATTCTTGATGCCGCCCCCCCCGCC

>2219

CTTCGGAGGCTCTCCCGTGTTCTGTACCACCCAGCTTCCCCTTGATCCCTCCACCCCC  
GCAGCCAGGAGAGGGAAGTAACTGTTCTTTGAGCAGGACATTTCAATTTCAAAGTATT  
CTTGATGCCGCCCCCCCCGCCCA

>2220

TCGGAGGCTCTCCCGTGTTCTGTACCACCCAGCTTCCCCTTGATCCCTCCACCCCCGC  
AGCCAGGAGAGGGAAGTAACTGTTCTTTGAGCAGGACATTTCAATTTCAAAGTATTCTT  
GATGCCGCCCCCCCCGCCACC

>2221

TGTACCACCCAGCTTCCCCTTGATCCCTCCACCCCCGCAGCCAGGAGAGGGAAGTAA  
CTGTTCTTTGAGCAGGACATTTCAATTTCAAAGTATTCTTGATGCCGCCCCCCCCGCC  
ACCGCCAAGAATTCTGCTCTGTG

>2222

GGATCCCTCCACCCCCGCAGCCAGGAGAGGGAAGTAACTGTTCTTTGAGCAGGACATT  
TCATTTCAAAGTATTCTTGATGCCGCCCCCCCCGCCACCGCCAAGAATTCTGCTCTG  
TGGGTGATACTTATAAGGTAAGT



>2223

AACTGTTCTTTGAGCAGGACATTTCAATTTCAAAGTATTCTTGATGCCGCCCCCCCCGCC  
CCACCGCCAAGAATTCTGCTCTGTGGGTGATACTTATAAGGTAAGTATATGGCTTCCTTA  
TTTAGGCAGCAGTTTCTCTTC

>2224

TCAAAGTATTCTTGATGCCGCCCCCCCCGCCACCGCCAAGAATTCTGCTCTGTGGGTG  
ATACTTATAAGGTAAGTATATGGCTTCCTTATTTAGGCAGCAGTTTCTCTTCTATGATTTT  
AGTTCCTCTCATGATTCTTA

>2225

CCGCCCCACCGCCAAGAATTCTGCTCTGTGGGTGATACTTATAAGGTAAGTATATGGCTT  
CCTTATTTAGGCAGCAGTTTCTCTTCTATGATTTTAGTTCCTCTCATGATTCTTATAACCC  
TCTCTCAGATACTTCCAGG

>2226

CCCACCGCCAAGAATTCTGCTCTGTGGGTGATACTTATAAGGTAAGTATATGGCTTCCTT  
ATTTAGGCAGCAGTTTCTCTTCTATGATTTTAGTTCCTCTCATGATTCTTATAACCCCTCTC  
TCAGATACTTCCAGGATGA

>2227

GTGGGTGATACTTATAAGGTAAGTATATGGCTTCCTTATTTAGGCAGCAGTTTCTCTTCTA  
TGATTTTAGTTCCTCTCATGATTCTTATAACCCCTCTCTCAGATACTTCCAGGATGATAAAT  
CTTCTATCACTGTTTCAT

>2228

TCCTTATTTAGGCAGCAGTTTCTCTTCTATGATTTTAGTTCCTCTCATGATTCTTATAACC  
CTCTCTCAGATACTTCCAGGATGATAAATCTTCTATCACTGTTTCATCTGATCACATCAG  
GGTGATTATATTTTCGTGAC

>2229

GGCAGCAGTTTCTCTTCTATGATTTTAGTTCCTCTCATGATTCTTATAACCCCTCTCTCAGA  
TACTTCCAGGATGATAAATCTTCTATCACTGTTTCATCTGATCACATCAGGGTGATTATAT  
TTCGTGACATAACCAGGT

>2230

TCTTATAACCCCTCTCTCAGATACTTCCAGGATGATAAATCTTCTATCACTGTTTCATCTGA  
TCACATCAGGGTGATTATATTTTCGTGACATAACCAGGTGGCTTTAATCCGTTGGTGGA  
GAACCAGGCTCTCACCTCCA

>2231

AGGATGATAAATCTTCTATCACTGTTTCATCTGATCACATCAGGGTGATTATATTTTCGTGA  
CATAACCAGGTGGCTTTAATCCGTTGGTGGAAGAACCAGGCTCTCACCTCCATTGTTTA  
AGATGTTATGTTTCTACTAA

>2232

TTTCATCTGATCACATCAGGGTGATTATATTTTCGTGACATAACCAGGTGGCTTTAATCCG  
TTGGTGGAAGAACCAGGCTCTCACCTCCATTGTTTAAGATGTTATGTTTCTACTAATCTG  
TCCACTGAGTGTCTCCATCC

>2233

CTGATCACATCAGGGTGATTATATTTTCGTGACATAACCAGGTGGCTTTAATCCGTTGGTG  
GAAGAACCAGGCTCTCACCTCCATTGTTTAAGATGTTATGTTTCTACTAATCTGTCCACT  
GAGTGTCTCCATCCTATTGT

>2234

ATTTCGTGACATAACCAGGTGGCTTTAATCCGTTGGTGGAAGAACCAGGCTCTCACCTC  
CATTGTTTAAAGATGTTATGTTTCTACTAATCTGTCCACTGAGTGTCTCCATCCTATTGTTT  
CCATTGCATGCTCTCAGGTT

>2235

GTTGGTGGAAGAACCAGGCTCTCACCTCCATTGTTTAAAGATGTTATGTTTCTACTAATCT  
GTCCACTGAGTGTCTCCATCCTATTGTTTCCATTGCATGCTCTCAGGTTATTTCCCTTTGTT  
CTTGGCTGTCTGATTGCTC

>2236

AAGATGTTATGTTTCTACTAATCTGTCCACTGAGTGTCTCCATCCTATTGTTTCCATTGCA  
TGCTCTCAGGTTATTTCCCTTTGTTCTTGGCTGTCTGATTGCTCCCAGAGGCTGCAGTTAT  
TTTATTTTATTTATTTTCAT

>2237

TCCATCCTATTGTTTCCATTGCATGCTCTCAGGTTATTTCCCTTTGTTCTTGGCTGTCTGAT  
TGCTCCCAGAGGCTGCAGTTATTTTATTTTATTTATTTTCATTTTTTGGTGGGAGTAGGGG  
ATTGATCTCTCTCTTGCCCT

>2238

CATCCTATTGTTTCCATTGCATGCTCTCAGGTTATTTCCCTTTGTTCTTGGCTGTCTGATTG  
CTCCCAGAGGCTGCAGTTATTTTATTTTATTTATTTTCATTTTTTGGTGGGAGTAGGGGATT  
GATCTCTCTCTTGCCCTT

>2239

TTCTTGGCTGTCTGATTGCTCCCAGAGGCTGCAGTTATTTTATTTTATTTATTTTCATTTTT  
TGGTGGGAGTAGGGGATTGATCTCTCTCTTGCCCTTAGCTTGAATGGGTGGTCATTTCC  
AGGCTTACACATTGCTCCAT

>2240

TGCAGTTATTTTATTTTATTTATTTTCATTTTTTGGTGGGAGTAGGGGATTGATCTCTCTCT  
TGCCTTTAGCTTGAATGGGTGGTCATTTCCAGGCTTACACATTGCTCCATGCCCACTGTA  
GGGGTCTGGCTTAGAGATG

>2241

TTCATTTTTTGGTGGGAGTAGGGGATTGATCTCTCTCTTGCCCTTAGCTTGAATGGGTGG  
TCATTTCCAGGCTTACACATTGCTCCATGCCCACTGTAGGGGTCTGGCTTAGAGATGGT  
CGGGGGAGAGAAGGTGGTGAT

>2242

TCTCTCTCTTGCCCTTAGCTTGAATGGGTGGTCATTTCCAGGCTTACACATTGCTCCATG  
CCCACTGTAGGGGTCTGGCTTAGAGATGGTCGGGGGAGAGAAGGTGGTGATTTAAAA  
GATTTGGAGGCGGTGGCTTACAT

>2243

TTTAGCTTGAATGGGTGGTCATTTCCAGGCTTACACATTGCTCCATGCCCACTGTAGGG  
GTCTGGCTTAGAGATGGTCGGGGGAGAGAAGGTGGTGATTTAAAAGATTTGGAGGCG  
GTGGCTTACATTGATTTAGCTTA

>2244

GTCATTTCCAGGCTTACACATTGCTCCATGCCCACTGTAGGGGTCTGGCTTAGAGATGG  
TCGGGGGAGAGAAGGTGGTGATTTAAAAGATTTGGAGGCGGTGGCTTACATTGATTTT  
AGCTTATCTAACCCTTAGCTAG

>2245

CATTGCTCCATGCCCACTGTAGGGGTCTGGCTTAGAGATGGTCGGGGGAGAGAAGGTG  
GTGATTTAAAAGATTGGAGGCGGTGGCTTACATTGATTTTAGCTTATCTAACCCTTTAG  
CTAGAGGCTGCTCTTCCCTCAG

>2246

CATGCCCACTGTAGGGGTCTGGCTTAGAGATGGTCGGGGGAGAGAAGGTGGTGATTTA  
AAAGATTTGGAGGCGGTGGCTTACATTGATTTTAGCTTATCTAACCCTTTAGCTAGAGG  
CTGCTCTTCCCTCAGAGTGTCCA

>2247

TTAGAGATGGTCGGGGGAGAGAAGGTGGTGATTTAAAAGATTGGAGGCGGTGGCTTA  
CATTGATTTTAGCTTATCTAACCCTTTAGCTAGAGGCTGCTCTTCCCTCAGAGTGTCCAA  
CTAGCTGTAACCTTAAAGCAACA

>2248

AGAGAAGGTGGTGATTTAAAAGATTTGGAGGCGGTGGCTTACATTGATTTTAGCTTATC  
TAACCCTTTAGCTAGAGGCTGCTCTTCCCTCAGAGTGTCCAACCTAGCTGTAACCTAAAG  
CAACAGAGAAATGTATATCATC

>2249

ATTTGGAGGCGGTGGCTTACATTGATTTTAGCTTATCTAACCCTTTAGCTAGAGGCTGCT  
CTTCCCTCAGAGTGTCCAACCTAGCTGTAACCTTAAAGCAACAGAGAAATGTATATCATCC  
CTTTTCTTGCATTAATTAGGG

>2250

TTGGAGGCGGTGGCTTACATTGATTTTAGCTTATCTAACCCTTTAGCTAGAGGCTGCTCT  
TCCCTCAGAGTGTCCAACCTAGCTGTAACCTTAAAGCAACAGAGAAATGTATATCATCCCT  
TTTCTTGCATTAATTAGGGCT

>2251

TTTAGCTTATCTAACCCTTTAGCTAGAGGCTGCTCTTCCCTCAGAGTGTCCAACCTAGCT  
GTAACCTTAAAGCAACAGAGAAATGTATATCATCCCTTTTCTTGCATTAATTAGGGCTGAG  
AAATTCATTATTTAGAGGGAT

>2252

AGAGTGTCCAACCTAGCTGTAACCTTAAAGCAACAGAGAAATGTATATCATCCCTTTTCTT  
GCATTAATTAGGGCTGAGAAATTCATTATTTAGAGGGATAAGAGCTCCGGAGGAGGAG  
GGTTTTTTGAACTAATGTAGAGA

>2253

CCAACCTAGCTGTAACCTTAAAGCAACAGAGAAATGTATATCATCCCTTTTCTTGCATTAAT  
TAGGGCTGAGAAATTCATTATTTAGAGGGATAAGAGCTCCGGAGGAGGAGGGTTTTTT  
GAACTAATGTAGAGATCTGTGG

>2254

CAGAGAAATGTATATCATCCCTTTTCTTGCATTAATTAGGGCTGAGAAATTCATTATTTAG  
AGGGATAAGAGCTCCGGAGGAGGAGGGTTTTTTGAACTAATGTAGAGATCTGTGGCCA  
GCTGTGTGATTCTCAGGTAGC

>2255

TATATCATCCCTTTTCTTGCATTAATTAGGGCTGAGAAATTCATTATTTAGAGGGATAAGA  
GCTCCGGAGGAGGAGGGTTTTTTGAACTAATGTAGAGATCTGTGGCCAGCTGTGTGAT  
TCTCAGGTAGCAGGTGAGGGG

>2256  
ATCATCCCTTTTCTTGCAATTAATTAGGGCTGAGAAATTCATTATTTAGAGGGATAAGAGC  
TCCGGAGGAGGAGGGTTTTTTGAACTAATGTAGAGATCTGTGGCCAGCTGTGTGATTC  
TCAGGTAGCAGGTGAGGGGGTG

>2257  
TAGGGCTGAGAAATTCATTATTTAGAGGGATAAGAGCTCCGGAGGAGGAGGGTTTTTT  
GAACTAATGTAGAGATCTGTGGCCAGCTGTGTGATTCTCAGGTAGCAGGTGAGGGGGT  
GGGGGTTGATGAGAGGGGGTGAGAA

>2258  
TCATTATTTAGAGGGATAAGAGCTCCGGAGGAGGAGGGTTTTTTGAACTAATGTAGAGA  
TCTGTGGCCAGCTGTGTGATTCTCAGGTAGCAGGTGAGGGGGTGGGGGTTGATGAGAG  
GGGTGAGAAGGAGCAGGTGCCAG

>2259  
GAGCTCCGGAGGAGGAGGGTTTTTTGAACTAATGTAGAGATCTGTGGCCAGCTGTGTG  
ATTCTCAGGTAGCAGGTGAGGGGGTGGGGGTTGATGAGAGGGGTGAGAAGGAGCAGG  
TGCCAGGGTCAGGCAGGGGAGGGAG

>2260  
CTCCGGAGGAGGAGGGTTTTTTGAACTAATGTAGAGATCTGTGGCCAGCTGTGTGATT  
CTCAGGTAGCAGGTGAGGGGGTGGGGGTTGATGAGAGGGGTGAGAAGGAGCAGGTG  
CCAGGGTCAGGCAGGGGAGGGAGCCC

>2261  
GAGGAGGAGGGTTTTTTGAACTAATGTAGAGATCTGTGGCCAGCTGTGTGATTCTCAG  
GTAGCAGGTGAGGGGGTGGGGGTTGATGAGAGGGGTGAGAAGGAGCAGGTGCCAGG  
GTCAGGCAGGGGAGGGAGCCCCACT

>2262  
AACTAATGTAGAGATCTGTGGCCAGCTGTGTGATTCTCAGGTAGCAGGTGAGGGGGTG  
GGGGTTGATGAGAGGGGTGAGAAGGAGCAGGTGCCAGGGTCAGGCAGGGGAGGGAG  
CCCCACTCCGTGCATCATCCCAGAG

>2263  
TGGCCAGCTGTGTGATTCTCAGGTAGCAGGTGAGGGGGTGGGGGTTGATGAGAGGGG  
TGAGAAGGAGCAGGTGCCAGGGTCAGGCAGGGGAGGGAGCCCCACTCCGTGCATCA  
TCCCAGAGCCCTGTTCTCCAAGCCC

>2264  
CTCAGGTAGCAGGTGAGGGGGTGGGGGTTGATGAGAGGGGTGAGAAGGAGCAGGTG  
CCAGGGTCAGGCAGGGGAGGGAGCCCCACTCCGTGCATCATCCCAGAGCCCTGTTCT  
CTCCAAGCCCAGATTAGACACCTTCT

>2265  
GTAGCAGGTGAGGGGGTGGGGGTTGATGAGAGGGGTGAGAAGGAGCAGGTGCCAGG  
GTCAGGCAGGGGAGGGAGCCCCACTCCGTGCATCATCCCAGAGCCCTGTTCTCCA  
GCCAGATTAGACACCTTCTCCACG

>2266  
CAGGTGAGGGGGTGGGGGTTGATGAGAGGGGTGAGAAGGAGCAGGTGCCAGGGTCA  
GGCAGGGGAGGGAGCCCCACTCCGTGCATCATCCCAGAGCCCTGTTCTCCAAGCCC  
AGATTAGACACCTTCTCCACGTGGG

>2267

AGAGGGGTGAGAAGGAGCAGGTGCCAGGGTCAGGCAGGGGAGGGAGCCCCCACTCC  
GTGCATCATCCCAGAGCCCTGTTCTCCAAGCCCAGATTAGACACCCTTCTCCACGTGG  
GGCCTCAAGTTAGAAATCCTGGGAG

>2268

GGTCAGGCAGGGGAGGGAGCCCCCACTCCGTGCATCATCCCAGAGCCCTGTTCTCCA  
AGCCCAGATTAGACACCCTTCTCCACGTGGGGCCTCAAGTTAGAAATCCTGGGAGGAG  
GCCTTATTGCTCAGGATCATCTGG

>2269

CCGTGCATCATCCCAGAGCCCTGTTCTCCAAGCCCAGATTAGACACCCTTCTCCACGT  
GGGGCCTCAAGTTAGAAATCCTGGGAGGAGGCCTTATTGCTCAGGATCATCTGGGAAT  
GTTGCTTTCTGGGTTTAAATAC

>2270

GCATCATCCCAGAGCCCTGTTCTCCAAGCCCAGATTAGACACCCTTCTCCACGTGGG  
GCCTCAAGTTAGAAATCCTGGGAGGAGGCCTTATTGCTCAGGATCATCTGGGAATGTTG  
CTTCTGGGTTTAAATACAGTC

>2271

CCCAGATTAGACACCCTTCTCCACGTGGGGCCTCAAGTTAGAAATCCTGGGAGGAGGC  
CTTATTGCTCAGGATCATCTGGGAATGTTGCTTTCTGGGTTTAAATACAGTCAATGTTT  
AGATGAGCTGCTGTTCAAGCAC

>2272

AGAAATCCTGGGAGGAGGCCTTATTGCTCAGGATCATCTGGGAATGTTGCTTTCTGGGT  
TTAAATACAGTCAATGTTTAGATGAGCTGCTGTTCAAGGCACATGGTCTGGTTAGCAA  
GGGTTAAATCCTGCATCCCGTT

>2273

GAGGAGGCCTTATTGCTCAGGATCATCTGGGAATGTTGCTTTCTGGGTTTAAATACAG  
TCAATGTTTAGATGAGCTGCTGTTCAAGGCACATGGTCTGGTTAGCAAAGGGTTAAATCC  
TGCATCCCGTTTTTAGTCATCA

>2274

TCAGGATCATCTGGGAATGTTGCTTTCTGGGTTTAAATACAGTCAATGTTTAGATGAG  
CTGCTGTTCAAGGCACATGGTCTGGTTAGCAAAGGGTTAAATCCTGCATCCCGTTTTAG  
TCATCAAGCTAGCTCAGATCTG

>2275

TGTTGCTTTCTGGGTTTAAATACAGTCAATGTTTAGATGAGCTGCTGTTCAAGGCACAT  
GGTCTGGTTAGCAAAGGGTTAAATCCTGCATCCCGTTTTTAGTCATCAAGCTAGCTCAG  
ATCTGCCACCTTGGAGCCCTG

>2276

GTTTAGATGAGCTGCTGTTCAAGGCACATGGTCTGGTTAGCAAAGGGTTAAATCCTGCAT  
CCCGTTTTTAGTCATCAAGCTAGCTCAGATCTGCCACCTTGGAGCCCTGTGCTTTCT  
GCCTTAGTGGGCAGAGTCTAGG

>2277

GAGCTGCTGTTCAAGGCACATGGTCTGGTTAGCAAAGGGTTAAATCCTGCATCCCGTTTT  
TAGTCATCAAGCTAGCTCAGATCTGCCACCTTGGAGCCCTGTGCTTTCTGCCTTAGT  
GGGCAGAGTCTAGGGGACCTGT

>2278

TGCTGTTTCAGGCACATGGTCTGGTTAGCAAAGGGTTAAATCCTGCATCCCGTTTTTAGT  
CATCAAGCTAGCTCAGATCTGCCCACCTTGGAGCCCTGTGCTTTCCTGCCTTAGTGGGC  
AGAGTCTAGGGGACCTGTGGCA

>2279

GTTAGCAAAGGGTTAAATCCTGCATCCCGTTTTTAGTCATCAAGCTAGCTCAGATCTGC  
CCACCTTGGAGCCCTGTGCTTTCCTGCCTTAGTGGGCAGAGTCTAGGGGACCTGTGGC  
ATGTTCAATGATTGAGGACTCTT

>2280

GCATCCCGTTTTTAGTCATCAAGCTAGCTCAGATCTGCCCACCTTGGAGCCCTGTGCTT  
TCCTGCCTTAGTGGGCAGAGTCTAGGGGACCTGTGGCATGTTCAATGATTGAGGACTC  
TTGTCCAGATTCCAAAAACCTAC

>2281

TTTTAGTCATCAAGCTAGCTCAGATCTGCCCACCTTGGAGCCCTGTGCTTTCCTGCCTT  
AGTGGGCAGAGTCTAGGGGACCTGTGGCATGTTCAATGATTGAGGACTCTTGTCCAGA  
TTCCAAAAACCTACTGTGATGAT

>2282

GTCATCAAGCTAGCTCAGATCTGCCCACCTTGGAGCCCTGTGCTTTCCTGCCTTAGTGG  
GCAGAGTCTAGGGGACCTGTGGCATGTTCAATGATTGAGGACTCTTGTCCAGATTCCA  
AAAACCTACTGTGATGATGCTGT

>2283

CTTGGAGCCCTGTGCTTTCCTGCCTTAGTGGGCAGAGTCTAGGGGACCTGTGGCATGT  
TCAATGATTGAGGACTCTTGTCCAGATTCCAAAAACCTACTGTGATGATGCTGTTCTGA  
AGCTGTGGTAGGCGGTGATTGAG

>2284

GCTTTCCTGCCTTAGTGGGCAGAGTCTAGGGGACCTGTGGCATGTTCAATGATTGAGG  
ACTCTTGTCCAGATTCCAAAAACCTACTGTGATGATGCTGTTCTGAAGCTGTGGTAGGC  
GGTGATTGAGTGGAGTGTGTAGT

>2285

GTGGCATGTTCAATGATTGAGGACTCTTGTCCAGATTCCAAAAACCTACTGTGATGATG  
CTGTTCTGAAGCTGTGGTAGGCGGTGATTGAGTGGAGTGTGTAGTGACCCTCAGGAAT  
TCTTCAGAAGTTAGGATTTTGAC

>2286

TCAATGATTGAGGACTCTTGTCCAGATTCCAAAAACCTACTGTGATGATGCTGTTCTGA  
AGCTGTGGTAGGCGGTGATTGAGTGGAGTGTGTAGTGACCCTCAGGAATTCTTCAGAA  
GTTAGGATTTTGACGATACCTCT

>2287

GATTCCAAAAACCTACTGTGATGATGCTGTTCTGAAGCTGTGGTAGGCGGTGATTGAGT  
GGAGTGTGTAGTGACCCTCAGGAATTCTTCAGAAGTTAGGATTTTGACGATACCTCTGA  
TAAGTTGGGTTTTTAATTTGCT

>2288

ACCTACTGTGATGATGCTGTTCTGAAGCTGTGGTAGGCGGTGATTGAGTGGAGTGTGTA  
GTGACCCTCAGGAATTCTTCAGAAGTTAGGATTTTGACGATACCTCTGATAAGTTGGGT  
TTTTAATTTGCTGGTTTATCTT

>2289

TGATGCTGTTCTGAAGCTGTGGTAGGCGGTGATTGAGTGGAGTGTGTAGTGACCCTCA  
GGAATTCTTCAGAAGTTAGGATTTTGACGATACCTCTGATAAGTTGGGTTTTTAATTTGC  
TGGTTTATCTTAGAGTGGAGGC

>2290

GTTCTGAAGCTGTGGTAGGCGGTGATTGAGTGGAGTGTGTAGTGACCCTCAGGAATTC  
TTCAGAAGTTAGGATTTTGACGATACCTCTGATAAGTTGGGTTTTTAATTTGCTGGTTTA  
TCTTAGAGTGGAGGCTGTGGCC

>2291

ATTGAGTGGAGTGTGTAGTGACCCTCAGGAATTCTTCAGAAGTTAGGATTTTGACGATA  
CCTCTGATAAGTTGGGTTTTTAATTTGCTGGTTTATCTTAGAGTGGAGGCTGTGGCCCA  
CAGCAAGTAGTACATTTTCCAT

>2292

ATTCTTCAGAAGTTAGGATTTTGACGATACCTCTGATAAGTTGGGTTTTTAATTTGCTGG  
TTTATCTTAGAGTGGAGGCTGTGGCCACAGCAAGTAGTACATTTTCCATCTCAGCCCA  
GTGCATGGACAAACGTACCTC

>2293

TCTTCAGAAGTTAGGATTTTGACGATACCTCTGATAAGTTGGGTTTTTAATTTGCTGGTT  
TATCTTAGAGTGGAGGCTGTGGCCACAGCAAGTAGTACATTTTCCATCTCAGCCCAGT  
GCATGGACAAACGTACCTCAA

>2294

TGACGATACCTCTGATAAGTTGGGTTTTTAATTTGCTGGTTTATCTTAGAGTGGAGGCTG  
TGGCCACAGCAAGTAGTACATTTTCCATCTCAGCCCAGTGCATGGACAAACGTACCTC  
AAACCAAAGGTTCAATGAAGC

>2295

TTTTTAATTTGCTGGTTTATCTTAGAGTGGAGGCTGTGGCCACAGCAAGTAGTACATTT  
TCCATCTCAGCCCAGTGCATGGACAAACGTACCTCAAACCAAAGGTTCAATGAAGCTC  
TATTTATCTTTACTATATGCTC

>2296

AATTTGCTGGTTTATCTTAGAGTGGAGGCTGTGGCCACAGCAAGTAGTACATTTCCA  
TCTCAGCCCAGTGCATGGACAAACGTACCTCAAACCAAAGGTTCAATGAAGCTCTATT  
TATCTTTACTATATGCTCTGGTA

>2297

TGTGGCCACAGCAAGTAGTACATTTTCCATCTCAGCCCAGTGCATGGACAAACGTAC  
CTCAAACCAAAGGTTCAATGAAGCTCTATTTATCTTTACTATATGCTCTGGTATCTTCTCT  
TCCATTCTATCTTATTTCAAT

>2298

AATGAAGCTCTATTTATCTTTACTATATGCTCTGGTATCTTCTCTTCCATTCTATCTTATT  
CATTTAAGAACGTTAATGAAGACCCACTAATGGATTGCCACCCATGGTTCGAGGAGGTC  
CCCCAACAGTGAGGCCTT

>2299

TTATCTTTACTATATGCTCTGGTATCTTCTCTTCCATTCTATCTTATTTCAATTAAGAACGT  
TAATGAAGACCCACTAATGGATTGCCACCCATGGTTCGAGGAGGTCCCCAACAGTG  
AGGCCTTAGCCATAGGTATT

>2300

TCCATTCTATCTTATTTCAATTAAGAACGTTAATGAAGACCCACTAATGGATTGCCACCC  
ATGGTTCGAGGAGGTCCCCCAAACAGTGAGGCCTTAGCCATAGGTATTCAATTCAAAA  
AGCATTTACTGAGCATCACTGT

>2301

TCATTTAAGAACGTTAATGAAGACCCACTAATGGATTGCCACCCATGGTTCGAGGAGGT  
CCCCCAAACAGTGAGGCCTTAGCCATAGGTATTCAATTCAAAAAGCATTTACTGAGCAT  
CACTGTGTACTAGGTGGTTGCT

>2302

CGTTAATGAAGACCCACTAATGGATTGCCACCCATGGTTCGAGGAGGTCCCCCAAACA  
GTGAGGCCTTAGCCATAGGTATTCAATTCAAAAAGCATTTACTGAGCATCACTGTGTAC  
TAGGTGGTTGCTAAATGCTATGG

>2303

TGAAGACCCACTAATGGATTGCCACCCATGGTTCGAGGAGGTCCCCCAAACAGTGAGG  
CCTTAGCCATAGGTATTCAATTCAAAAAGCATTTACTGAGCATCACTGTGTACTAGGTG  
GTTGCTAAATGCTATGGGGGTAA

>2304

ATTGCCACCCATGGTTCGAGGAGGTCCCCCAAACAGTGAGGCCTTAGCCATAGGTATTC  
AATTCAAAAAGCATTTACTGAGCATCACTGTGTACTAGGTGGTTGCTAAATGCTATGGG  
GGTAATGCAGAGAAATTAATAA

>2305

CCCAAACAGTGAGGCCTTAGCCATAGGTATTCAATTCAAAAAGCATTTACTGAGCATCA  
CTGTGTACTAGGTGGTTGCTAAATGCTATGGGGGTAAATGCAGAGAAATTAATAAATCCC  
TGTAAGAGTTCACTGTAAACA

>2306

CAATTCAAAAAGCATTTACTGAGCATCACTGTGTACTAGGTGGTTGCTAAATGCTATGG  
GGGTAATGCAGAGAAATTAATAAATCCCTGTAAGAGTTCACTGTAAAACAGAAATGAC  
AGCCATATGTGTATGACTTTGTG

>2307

ATTCAAAAAGCATTTACTGAGCATCACTGTGTACTAGGTGGTTGCTAAATGCTATGGGG  
GTAATGCAGAGAAATTAATAAATCCCTGTAAGAGTTCACTGTAAAACAGAAATGACAG  
CCATATGTGTATGACTTTGTGTG

>2308

TGGTTGCTAAATGCTATGGGGGTAAATGCAGAGAAATTAATAAATCCCTGTAAGAGTTCA  
CTGTAAAACAGAAATGACAGCCATATGTGTATGACTTTGTGTGTGTGTGTATATATATATA  
TCAGACTGTATGATTAAATA

>2309

AATGCTATGGGGGTAAATGCAGAGAAATTAATAAATCCCTGTAAGAGTTCACTGTAAAAC  
AGAAATGACAGCCATATGTGTATGACTTTGTGTGTGTGTGTATATATATATATCAGACTGT  
ATGATTAAATATTATATAAG

>2310

GTTCACTGTAAAACAGAAATGACAGCCATATGTGTATGACTTTGTGTGTGTGTGTATATA  
TATATATCAGACTGTATGATTAAATATTATATAAGTGAGGTATGGGGGAGCAGAGGAGAG  
GAATTGAATTTTGAATTTTG



>2311

CCATATGTGTATGACTTTGTGTGTGTGTGTATATATATATATCAGACTGTATGATTAAATAT  
TATATAAGTGAGGTATGGGGGAGCAGAGGAGAGGAATTGAATTTTGAATTTTGATTGAA  
GATTCAGGAGGGCTTCATG

>2312

ATGTGTATGACTTTGTGTGTGTGTGTATATATATATATCAGACTGTATGATTAAATATTATA  
TAAGTGAGGTATGGGGGAGCAGAGGAGAGGAATTGAATTTTGAATTTTGATTGAAGAT  
TCAGGAGGGCTTCATGGAGG

>2313

GATTAAATATTATATAAGTGAGGTATGGGGGAGCAGAGGAGAGGAATTGAATTTTGAAT  
TTTGATTGAAGATTCAGGAGGGCTTCATGGAGGAGGTAGCATTGCGCCAGGTTTITAGA  
GAATGGCTAGGCTTTGGACAAGT

>2314

ATATTATATAAGTGAGGTATGGGGGAGCAGAGGAGAGGAATTGAATTTTGAATTTTGAT  
TGAAGATTCAGGAGGGCTTCATGGAGGAGGTAGCATTGCGCCAGGTTTITAGAGAATGG  
CTAGGCTTTGGACAAGTGGAGAC

>2315

ATGGGGGAGCAGAGGAGAGGAATTGAATTTTGAATTTTGATTGAAGATTCAGGAGGGC  
TTCATGGAGGAGGTAGCATTGCGCCAGGTTTITAGAGAATGGCTAGGCTTTGGACAAGT  
GGAGACAGGAACTGCCATTTGGAG

>2316

TTGAATTTTGAATTTTGATTGAAGATTCAGGAGGGCTTCATGGAGGAGGTAGCATTGCG  
CCAGGTTTITAGAGAATGGCTAGGCTTTGGACAAGTGGAGACAGGAACTGCCATTTGGA  
GGTAGGAGATGAGCTAATGTGTG

>2317

GAATTTTGAATTTTGATTGAAGATTCAGGAGGGCTTCATGGAGGAGGTAGCATTGCGCC  
AGGTTTITAGAGAATGGCTAGGCTTTGGACAAGTGGAGACAGGAACTGCCATTTGGAG  
GTAGGAGATGAGCTAATGTGTGGC

>2318

ATTTTGATTGAAGATTCAGGAGGGCTTCATGGAGGAGGTAGCATTGCGCCAGGTTTITAG  
AGAATGGCTAGGCTTTGGACAAGTGGAGACAGGAACTGCCATTTGGAGGTAGGAGAT  
GAGCTAATGTGTGGCAGTGTATGG

>2319

GATTCAGGAGGGCTTCATGGAGGAGGTAGCATTGCGCCAGGTTTITAGAGAATGGCTAG  
GCTTTGGACAAGTGGAGACAGGAACTGCCATTTGGAGGTAGGAGATGAGCTAATGTGT  
GGCAGTGTATGGGTGGGGGCAGGT

>2320

GTAGCATTGCGCCAGGTTTITAGAGAATGGCTAGGCTTTGGACAAGTGGAGACAGGAAC  
TGCCATTTGGAGGTAGGAGATGAGCTAATGTGTGGCAGTGTATGGGTGGGGGCAGGTG  
CCTGTATACAAGGTAGTGTGCTGG

>2321

CAGGTTTITAGAGAATGGCTAGGCTTTGGACAAGTGGAGACAGGAACTGCCATTTGGAG  
GTAGGAGATGAGCTAATGTGTGGCAGTGTATGGGTGGGGGCAGGTGCTGTATACAAG  
GTAGTGTGCTGGAATGGGGCGATG

>2322

TGGCTAGGCTTTGGACAAGTGGAGACAGGAACTGCCATTTGGAGGTAGGAGATGAGCT  
AATGTGTGGCAGTGTATGGGTGGGGGCAGGTGCCTGTATACAAGGTAGTGTGCTGGAA  
TGGGGCGATGGGCATGGGGTAGGA

>2323

AGTGGAGACAGGAACTGCCATTTGGAGGTAGGAGATGAGCTAATGTGTGGCAGTGTAT  
GGGTGGGGGCAGGTGCCTGTATACAAGGTAGTGTGCTGGAATGGGGCGATGGGCATGG  
GGTAGGATGGGAGATCAAGCAGGG

>2324

ATTTGGAGGTAGGAGATGAGCTAATGTGTGGCAGTGTATGGGTGGGGGCAGGTGCCTG  
TATACAAGGTAGTGTGCTGGAATGGGGCGATGGGCATGGGGTAGGATGGGAGATCAAG  
CAGGGAAAGTGGATTGGGGCCAGG

>2325

AGTGTATGGGTGGGGGCAGGTGCCTGTATACAAGGTAGTGTGCTGGAATGGGGCGATG  
GGCATGGGGTAGGATGGGAGATCAAGCAGGGAAAGTGGATTGGGGCCAGGTCCTAGA  
ATGATTTGAATACCAAGCTAGCTTT

>2326

GGTGGGGGCAGGTGCCTGTATACAAGGTAGTGTGCTGGAATGGGGCGATGGGCATGGG  
GTAGGATGGGAGATCAAGCAGGGAAAGTGGATTGGGGCCAGGTCCTAGAATGATTTGA  
ATACCAAGCTAGCTTTCTGGACAT

>2327

GGAATGGGGCGATGGGCATGGGGTAGGATGGGAGATCAAGCAGGGAAAGTGGATTGG  
GGCCAGGTCCTAGAATGATTTGAATACCAAGCTAGCTTTCTGGACATTTGTAAGGCGCA  
CTTGATAGGGGTTGGATCATTGCG

>2328

TGGGGTAGGATGGGAGATCAAGCAGGGAAAGTGGATTGGGGCCAGGTCCTAGAATGA  
TTTGAATACCAAGCTAGCTTTCTGGACATTTGTAAGGCGCACTTGATAGGGGTTGGATC  
ATTGCGATATTATTGGAAGACAAA

>2329

AGGGAAAGTGGATTGGGGCCAGGTCCTAGAATGATTTGAATACCAAGCTAGCTTTCTG  
GACATTTGTAAGGCGCACTTGATAGGGGTTGGATCATTGCGATATTATTGGAAGACAAA  
ACTGGGGAGGGTGTGAGACCATG

>2330

TGGGGCCAGGTCCTAGAATGATTTGAATACCAAGCTAGCTTTCTGGACATTTGTAAGGC  
GCACTTGATAGGGGTTGGATCATTGCGATATTATTGGAAGACAAAAGTGGGGAGGGTG  
TGAGACCATGTGGCTGCTCAGAA

>2331

CCAAGCTAGCTTTCTGGACATTTGTAAGGCGCACTTGATAGGGGTTGGATCATTGCGAT  
ATTATTGGAAGACAAAAGTGGGGAGGGTGTGAGACCATGTGGCTGCTCAGAATGCAG  
AGCCCCCTGATGTCCTCAGCCTT

>2332

TGGACATTTGTAAGGCGCACTTGATAGGGGTTGGATCATTGCGATATTATTGGAAGACA  
AAAGTGGGGAGGGTGTGAGACCATGTGGCTGCTCAGAATGCAGAGCCCCCTGATGTC  
CTCAGCCTTCTACGTATTTAGTG

>2333

AGGGGTTGGATCATTGCGATATTATTGGAAGACAAAACCTGGGGAGGGTGTGAGACCAT  
GTGGCTGCTCAGAATGCAGAGCCCCCTCTGATGTCCTCAGCCTTCTACGTATTTAGTGAT  
GGGGGTGGTGGTGGTAAAGAGCC

>2334

GGATCATTGCGATATTATTGGAAGACAAAACCTGGGGAGGGTGTGAGACCATGTGGCTG  
CTCAGAATGCAGAGCCCCCTCTGATGTCCTCAGCCTTCTACGTATTTAGTGATGGGGGTG  
GTGGTGGTAAAGAGCCTTGCAGA

>2335

GAAGACAAAACCTGGGGAGGGTGTGAGACCATGTGGCTGCTCAGAATGCAGAGCCCCCT  
CTGATGTCCTCAGCCTTCTACGTATTTAGTGATGGGGGTGGTGGTGGTAAAGAGCCTTG  
CAGACAGCCTGGCTTGGGTGCTTG

>2336

TCAGAATGCAGAGCCCCCTCTGATGTCCTCAGCCTTCTACGTATTTAGTGATGGGGGTGG  
TGGTGGTAAAGAGCCTTGCAGACAGCCTGGCTTGGGTGCTTGCTTGAAGTTCTTACGC  
CCACTAACTCCTGCCCTGCTCTG

>2337

AGAATGCAGAGCCCCCTCTGATGTCCTCAGCCTTCTACGTATTTAGTGATGGGGGTGGTG  
GTGGTAAAGAGCCTTGCAGACAGCCTGGCTTGGGTGCTTGCTTGAAGTTCTTACGCCC  
ACTAACTCCTGCCCTGCTCTGTG

>2338

CGTATTTAGTGATGGGGGTGGTGGTGGTAAAGAGCCTTGCAGACAGCCTGGCTTGGGT  
GCTTGCTTGAAGTTCTTACGCCCCACTAACTCCTGCCCTGCTCTGTGGAGCCTGCTGAAT  
GGGGCATTAGGCTAGTCACACAC

>2339

TGCAGACAGCCTGGCTTGGGTGCTTGCTTGAAGTTCTTACGCCCCACTAACTCCTGCCCT  
GCTCTGTGGAGCCTGCTGAATGGGGCATTAGGCTAGTCACACACCTGTCCCTTTTTCACA  
TTCATGCTGTACCCTTTGCAA

>2340

TGCTTGCTTGAAGTTCTTACGCCCCACTAACTCCTGCCCTGCTCTGTGGAGCCTGCTGAA  
TGGGGCATTAGGCTAGTCACACACCTGTCCCTTTTTCACATTCATGCTGTACCCTTTGCA  
AACATTACGCAGCAGTGCAAAC

>2341

GGGGCATTAGGCTAGTCACACACCTGTCCTTTTTCACATTCATGCTGTACCCTTTGCAA  
ACATTACGCAGCAGTGCAAACCTCAGCCCTGGGCCTCAGAGGAGCCAGGCGTGGCCAG  
GAGAGTGGGATTTGGAACGGAAGT

>2342

GCATTAGGCTAGTCACACACCTGTCCTTTTTCACATTCATGCTGTACCCTTTGCAAACAT  
TACGCAGCAGTGCAAACCTCAGCCCTGGGCCTCAGAGGAGCCAGGCGTGGCCAGGAGA  
GTGGGATTTGGAACGGAAGTGCT

>2343

GTCACACACCTGTCCTTTTTCACATTCATGCTGTACCCTTTGCAAACATTACGCAGCAG  
TGCAAACCTCAGCCCTGGGCCTCAGAGGAGCCAGGCGTGGCCAGGAGAGTGGGATTTG  
GAACGGAAGTGCTTTTGTGTTTTGG

>2344

CCTTTTTTCACATTCATGCTGTACCCTTTGCAAACATTACGCAGCAGTGCAAACCTCAGCC  
CTGGGCCTCAGAGGAGCCAGGCGTGGCCAGGAGAGTGGGATTTGGAACGGAAGTGCT  
TTTGTTTTTGGCATTCACTACTCC

>2345

TTCACATTCATGCTGTACCCTTTGCAAACATTACGCAGCAGTGCAAACCTCAGCCCTGGG  
CCTCAGAGGAGCCAGGCGTGGCCAGGAGAGTGGGATTTGGAACGGAAGTGCTTTTGT  
TTTTGGCATTCACTACTCCCCAC

>2346

GCAGTGCAAACCTCAGCCCTGGGCCTCAGAGGAGCCAGGCGTGGCCAGGAGAGTGGG  
ATTTGGAACGGAAGTGCTTTTGT TTTTGGCATTCACTACTCCCCACCCCCACTGGCAC  
TTGGATTGTCCTTCTTTTCTCCTT

>2347

CTACTCCCCACCCCCACTGGCACTTGGATTGTCCTTCTTTTTCTCCTTGGTGTCTCTCA  
TCCTGTCCAGCCTTCAAGACCTCCTCAAGTCAGGCTTCTCTGGGAAGCGCTGTCTGTC  
TGTCTTGGTGCTTGCTGGCTTC

>2348

CCACCCCCACTGGCACTTGGATTGTCCTTCTTTTTCTCCTTGGTGTCTCTCATCCTGTCC  
AGCCTTCAAGACCTCCTCAAGTCAGGCTTCTCTGGGAAGCGCTGTCTGTCTGTCTTGG  
TGCTTGCTGGCTTCCTCTTCTG

>2349

CTTTTTCTCCTTGGTGTCTCTCATCCTGTCCAGCCTTCAAGACCTCCTCAAGTCAGGCT  
TCTCTGGGAAGCGCTGTCTGTCTGTCTTGGTGCTTGCTGGCTTCCTCTTCTGTCTCCTG  
TGCCATCTCCAGTTTGCACCAT

>2350

CTCTGGGAAGCGCTGTCTGTCTGTCTTGGTGCTTGCTGGCTTCCTCTTCTGTCTCCTGT  
GCCATCTCCAGTTTGCACCATTTGAGTATAAGCTCTGCTGCCTCATTTGAGTTTAAGTTT  
TATCCCCCAGCCACAACCTA

>2351

TCTGTCTGTCTTGGTGCTTGCTGGCTTCCTCTTCTGTCTCCTGTGCCATCTCCAGTTTGC  
ACCATTTGAGTATAAGCTCTGCTGCCTCATTTGAGTTTAAGTTTATCCCCCAGCCACA  
ACCTAAGTTCCATGAGGATA

>2352

TTCTCTTCTGTCTCCTGTGCCATCTCCAGTTTGCACCATTTGAGTATAAGCTCTGCTGC  
CTCATTTGAGTTTAAGTTTATCCCCCAGCCACAACCTAAGTTCCATGAGGATAGTGAT  
TGTGGTTTATCTTCTCTCCC

>2353

CCATCTCCAGTTTGCACCATTTGAGTATAAGCTCTGCTGCCTCATTTGAGTTTAAGTTT  
ATCCCCCAGCCACAACCTAAGTTCCATGAGGATAGTGATTGTGGTTTATCTTCTCTCCC  
TCAGCTGTCTGCTGACACCA

>2354

TGCACCATTTGAGTATAAGCTCTGCTGCCTCATTTGAGTTTAAGTTTATCCCCCAGCC  
ACAACCTAAGTTCCATGAGGATAGTGATTGTGGTTTATCTTCTCTCCCTCAGCTGTCTGC  
TGACACCATGCTGAATACAT

>2355

TGAGTATAAGCTCTGCTGCCTCATTTGAGTTTAAAGTTTTATCCCCCAGCCACAACCTAA  
GTTCCATGAGGATAGTGATTGTGGTTTATCTTCTCTCCCTCAGCTGTCTGCTGACACCAT  
GCTGAATACATAGTAGGTAC

>2356

AGTTTTATCCCCCAGCCACAACCTAAGTTCCATGAGGATAGTGATTGTGGTTTATCTTC  
TCTCCCTCAGCTGTCTGCTGACACCATGCTGAATACATAGTAGGTACTCAGTAAATAATA  
GCTAATTGAGCATTACTAT

>2357

CCATGAGGATAGTGATTGTGGTTTATCTTCTCTCCCTCAGCTGTCTGCTGACACCATGCT  
GAATACATAGTAGGTACTCAGTAAATAATAGCTAATTGAGCATTACTATGGACAAAGCA  
CTTTACTTGCATTAACACAT

>2358

TGAGGATAGTGATTGTGGTTTATCTTCTCTCCCTCAGCTGTCTGCTGACACCATGCTGAA  
TACATAGTAGGTACTCAGTAAATAATAGCTAATTGAGCATTACTATGGACAAAGCACTT  
TACTTGCATTAACACATCCC

>2359

TCTCCCTCAGCTGTCTGCTGACACCATGCTGAATACATAGTAGGTACTCAGTAAATAATA  
GCTAATTGAGCATTACTATGGACAAAGCACTTTACTTGCATTAACACATCCCATCCTCA  
CAACCACCTGTGAGGTGAAT

>2360

TGACACCATGCTGAATACATAGTAGGTACTCAGTAAATAATAGCTAATTGAGCATTACT  
ATGGACAAAGCACTTTACTTGCATTAACACATCCCATCCTCACAACCACCTGTGAGGTG  
AATCCTATTAAAAGGAATACT

>2361

ATTGAGCATTACTATGGACAAAGCACTTTACTTGCATTAACACATCCCATCCTCACAAC  
CACCTGTGAGGTGAATCCTATTAAAAGGAATACTTGGGTGCTTTCAGAGTTATTCTCTC  
CAGCTTTGGACTTCTTGTTTC

>2362

GACAAAGCACTTTACTTGCATTAACACATCCCATCCTCACAACCACCTGTGAGGTGAAT  
CCTATTAAAAGGAATACTTGGGTGCTTTCAGAGTTATTCTCTCCAGCTTTGGACTTCTTG  
TTTCATTGCCCCTGAGAGCTC

>2363

TTAACACATCCCATCCTCACAACCACCTGTGAGGTGAATCCTATTAAAAGGAATACTTG  
GGTGCTTTCAGAGTTATTCTCTCCAGCTTTGGACTTCTTGTTTCATTGCCCCTGAGAGCT  
CCTCAACTCTGTTGATGCTGT

>2364

AAAAGGAATACTTGGGTGCTTTCAGAGTTATTCTCTCCAGCTTTGGACTTCTTGTTTCA  
TTTGCCCCTGAGAGCTCCTCAACTCTGTTGATGCTGTTCTTTCAAAGGTTGCTTGTGACC  
TCTTAGTTCTCAAGAGCACTGT

>2365

AAGGAATACTTGGGTGCTTTCAGAGTTATTCTCTCCAGCTTTGGACTTCTTGTTTCATT  
GCCCTGAGAGCTCCTCAACTCTGTTGATGCTGTTCTTTCAAAGGTTGCTTGTGACCTCT  
TAGTTCTCAAGAGCACTGTAT

>2366

TCCAGCTTTGGACTTCTTGTTTCATTTGCCCTGAGAGCTCCTCAACTCTGTTGATGCTG  
TTCTTTCAAAGGTTGCTTGTGACCTCTTAGTTCTCAAGAGCACTGTATTAGGTTGGTG  
AAAAGTAATTGCTATTTTAGAC

>2367

TTTCATTTGCCCTGAGAGCTCCTCAACTCTGTTGATGCTGTTCTTTCAAAGGTTGCTTG  
TGACCTCTTAGTTCTCAAGAGCACTGTATTAGGTTGGTGCAAAAGTAATTGCTATTTTA  
GACATTACTTTCAATGGCAAAA

>2368

GCCCTGAGAGCTCCTCAACTCTGTTGATGCTGTTCTTTCAAAGGTTGCTTGTGACCTCT  
TAGTTCTCAAGAGCACTGTATTAGGTTGGTGCAAAAGTAATTGCTATTTTAGACATTACT  
TTCAATGGCAAAAACTGCAAT

>2369

ATGCTGTTCTTTCAAAGGTTGCTTGTGACCTCTTAGTTCTCAAGAGCACTGTATTAGGT  
TGGTGCAAAAGTAATTGCTATTTTAGACATTACTTTCAATGGCAAAAACTGCAATTACTT  
TTGCGCCAACCTAATACTTTCC

>2370

AGGTTGCTTGTGACCTCTTAGTTCTCAAGAGCACTGTATTAGGTTGGTGCAAAAGTAAT  
TGCTATTTTAGACATTACTTTCAATGGCAAAAACTGCAATTACTTTTTCGCCAACCTAATA  
CTTCCCAGACTCCAGTATTG

>2371

TTGCTATTTTAGACATTACTTTCAATGGCAAAAACTGCAATTACTTTTTCGCCAACCTAAT  
ACTTTCCCAGACTCCAGTATTGGCTCCATTGACCCCTCCTGTTCCCTGCCAACTTCTCCC  
CCTCCTCCTCTGGTATTTCT

>2372

TTTAGACATTACTTTCAATGGCAAAAACTGCAATTACTTTTTCGCCAACCTAATACTTTCC  
CAGACTCCAGTATTGGCTCCATTGACCCCTCCTGTTCCCTGCCAACTTCTCCCCCTCCTC  
CTCTGGTATTTCTGGAACCTC

>2373

CATTGACCCCTCCTGTTCCCTGCCAACTTCTCCCCCTCCTCCTCTGGTATTTCTGGAACCT  
CCCTCCCTAGGGTCAGTGCCATGTGGTGCCCTGGAACCTCCCTGGGATCTGTGTTTGAATC  
CTGACATTGCCACTTTCTAAG

>2374

CCCCTCCTGTTCCCTGCCAACTTCTCCCCCTCCTCCTCTGGTATTTCTGGAACCTCCCTCC  
CTAGGGTCAGTGCCATGTGGTGCCCTGGAACCTCCCTGGGATCTGTGTTTGAATCCTGACA  
TTGCCACTTTCTAAGTGGCAA

>2375

GGTCAGTGCCATGTGGTGCCCTGGAACCTCCCTGGGATCTGTGTTTGAATCCTGACATTGC  
CACTTTCTAAGTGGCAAACACTTTGGCCACCTCCCCCTCTCCTGAGTCTGTTTCATCA  
TCTGCAAAATGCTGGTAGTTTC

>2376

CTGTGTTTGAATCCTGACATTGCCACTTTCTAAGTGGCAAACACTTTGGCCACCTCCCC  
CTCTTCCTGAGTCTGTTTCATCATCTGCAAAATGCTGGTAGTTTCTCTCTCACAGGAA  
AGATGGTGGTTGTTTCATCGATG

>2377

TAAGTGGCAAACACTTTGGCCACCTCCCCCTCTTCCTGAGTCTGTTTCATCATCTGCAA  
AATGCTGGTAGTTTCTCTTCTCACAGGAAAGATGGTGGTTGTTTCATCGATGTCTGTTGA  
AACCGTGACCCTCTCTGCTGAA

>2378

TTGGCCACCTCCCCCTCTTCCTGAGTCTGTTTCATCATCTGCAAAATGCTGGTAGTTTCT  
CTTCTCACAGGAAAGATGGTGGTTGTTTCATCGATGTCTGTTGAAACCGTGACCCTCTCT  
GCTGAATGTAGAAGAAGATGA

>2379

CACCTCCCCCTCTTCCTGAGTCTGTTTCATCATCTGCAAAATGCTGGTAGTTTCTCTTCT  
CACAGGAAAGATGGTGGTTGTTTCATCGATGTCTGTTGAAACCGTGACCCTCTCTGCTG  
AATGTAGAAGAAGATGACCTTA

>2380

CTTCTCACAGGAAAGATGGTGGTTGTTTCATCGATGTCTGTTGAAACCGTGACCCTCTCT  
GCTGAATGTAGAAGAAGATGACCTTACCAGTTCTCCTGTCTCTCCAGTGTCTTTCTTGA  
CAATCTTGTTGGTTTCCACAAGC

>2381

CTCACAGGAAAGATGGTGGTTGTTTCATCGATGTCTGTTGAAACCGTGACCCTCTCTGCT  
GAATGTAGAAGAAGATGACCTTACCAGTTCTCCTGTCTCTCCAGTGTCTTTCTTGACAA  
TCTTGTGGTTTCCACAAGCAAC

>2382

TGGTTGTTTCATCGATGTCTGTTGAAACCGTGACCCTCTCTGCTGAATGTAGAAGAAGAT  
GACCTTACCAGTTCTCCTGTCTCTCCAGTGTCTTTCTTGACAATCTTGTGGTTTCCACA  
AGCAACCCTCTGTGGGTGATTT

>2383

CTGTTGAAACCGTGACCCTCTCTGCTGAATGTAGAAGAAGATGACCTTACCAGTTCTC  
CTGTCTCTCCAGTGTCTTTCTTGACAATCTTGTGGTTTCCACAAGCAACCCTCTGTGGG  
TGATTTCCAGATCTCTACCTCTA

>2384

GAAGAAGATGACCTTACCAGTTCTCCTGTCTCTCCAGTGTCTTTCTTGACAATCTTGTG  
GTTTCCACAAGCAACCCTCTGTGGGTGATTTCCAGATCTCTACCTCTAGTTGTTTTTCG  
TTTTTGTCTTTTCTTGTGTTT

>2385

CCTGTCTCTCCAGTGTCTTTCTTGACAATCTTGTGGTTTCCACAAGCAACCCTCTGTGG  
GTGATTTCCAGATCTCTACCTCTAGTTGTTTTTCGTTTTTGTCTTTTCTTGTGTTTCACA  
CATCTTTTCCAGTAGCCTC

>2386

TTTCCAGATCTCTACCTCTAGTTGTTTTTCGTTTTTGTCTTTTCTTGTGTTTCACACATT  
CTTTTCCAGTAGCCTCACGGGCACACCAGTCCTGCAAGGATCTAGAATGTGATGGTTTG  
AGCTAGTTCAACACCTTCCT

>2387

CCAGATCTCTACCTCTAGTTGTTTTTCGTTTTTGTCTTTTCTTGTGTTTCACACATTCTT  
TTCCAGTAGCCTCACGGGCACACCAGTCCTGCAAGGATCTAGAATGTGATGGTTTGAG  
CTAGTTCAACACCTTCCTCTC

>2388

GTTGTTTTTCGTTTTTTGTCTTTTCTTGTGTTTCACACATTCTTTTCCAGTAGCCTCACG  
GGCACACCAGTCCTGCAAGGATCTAGAATGTGATGGTTTGAGCTAGTTCAACACCTTC  
CTCTCGAATCGTCTCCTGTGTC

>2389

CGTTTTTTGTCTTTTCTTGTGTTTCACACATTCTTTTCCAGTAGCCTCACGGGCACACCA  
GTCCTGCAAGGATCTAGAATGTGATGGTTTGAGCTAGTTCAACACCTTCCTCTCGAATC  
GTCTCCTGTGTCCTCATGTTT

>2390

TGTCTTTTCTTGTGTTTCACACATTCTTTTCCAGTAGCCTCACGGGCACACCAGTCCTG  
CAAGGATCTAGAATGTGATGGTTTGAGCTAGTTCAACACCTTCCTCTCGAATCGTCTCC  
TGTGTCCTCATGTTTTGTGGTC

>2391

TCACACATTCTTTTCCAGTAGCCTCACGGGCACACCAGTCCTGCAAGGATCTAGAATGT  
GATGGTTTGAGCTAGTTCAACACCTTCCTCTCGAATCGTCTCCTGTGTCCTCATGTTTTG  
TGGTCTCTGCCCTCTTCCCAG

>2392

CTAGTTCAACACCTTCCTCTCGAATCGTCTCCTGTGTCCTCATGTTTTGTGGTCTCTGCC  
CTCTTCCCAGGCACCCAACTGCAGACTTTGGCATCATCTGTGGCTCCTGTCTTCCCTTT  
GCCTTCCATATCCACCATTTG

>2393

TCCTCTCGAATCGTCTCCTGTGTCCTCATGTTTTGTGGTCTCTGCCCTCTTCCCAGGCAC  
CCAACTGCAGACTTTGGCATCATCTGTGGCTCCTGTCTTCCCTTTGCCTTCCATATCCAC  
CATTTGCCTCTCCAGCCTAC

>2394

TGCAGACTTTGGCATCATCTGTGGCTCCTGTCTTCCCTTTGCCTTCCATATCCACCATTT  
GCCTCTCCAGCCTACTTAACCAGATGGCTGTCCTGATTCCTCACCAGCCTTCCTGCAG  
TGCACCCCTGCAAGGCTCATC

>2395

ATCATCTGTGGCTCCTGTCTTCCCTTTGCCTTCCATATCCACCATTTGCCTCTCCAGCCT  
ACTTAACCAGATGGCTGTCCTGATTCCTCACCAGCCTTCCTGCAGTGCACCCCTGCAA  
GGCTCATCACCCCACTTCCCT

>2396

TTGCCTTCCATATCCACCATTTGCCTCTCCAGCCTACTTAACCAGATGGCTGTCCTGATT  
TCCTCACCAGCCTTCCTGCAGTGCACCCCTGCAAGGCTCATCACCCCACTTCCCTGAG  
CAGAGTAGGGCTCTGATGGGGT

>2397

TCTCCAGCCTACTTAACCAGATGGCTGTCCTGATTCCTCACCAGCCTTCCTGCAGTGC  
ACCCCTGCAAGGCTCATCACCCCACTTCCCTGAGCAGAGTAGGGCTCTGATGGGGTTG  
CTCTCCTGCTCTGAACCCTGCAG

>2398

GCTGTCCTGATTCCTCACCAGCCTTCCTGCAGTGCACCCCTGCAAGGCTCATCACCCC  
ACTTCCCTGAGCAGAGTAGGGCTCTGATGGGGTTGCTCTCCTGCTCTGAACCCTGCAG  
TGGCTCACTATGGCCTATTCTAG



>2399

GATTTTCCTCACCAGCCTTCCTGCAGTGCACCCCTGCAAGGCTCATCACCCCACTTCCCT  
GAGCAGAGTAGGGCTCTGATGGGGTTGCTCTCCTGCTCTGAACCCTGCAGTGGCTCAC  
TATGGCCTATTCTAGAGAAGAAA

>2400

GCTCATCACCCCACTTCCCTGAGCAGAGTAGGGCTCTGATGGGGTTGCTCTCCTGCTCT  
GAACCCTGCAGTGGCTCACTATGGCCTATTCTAGAGAAGAAACGAGAGAATTCTTAGC  
GTGGCATTCAAAGCCATCCGGGA

>2401

CAGAGTAGGGCTCTGATGGGGTTGCTCTCCTGCTCTGAACCCTGCAGTGGCTCACTAT  
GGCCTATTCTAGAGAAGAAACGAGAGAATTCTTAGCGTGGCATTCAAAGCCATCCGGG  
ATCCTAGATTCCAGCTACATTTTC

>2402

GCTCTCCTGCTCTGAACCCTGCAGTGGCTCACTATGGCCTATTCTAGAGAAGAAACGA  
GAGAATTCTTAGCGTGGCATTCAAAGCCATCCGGGATCCTAGATTCCAGCTACATTTTC  
ACTCTTCATCCCTTTCTCTGCAT

>2403

AACCCTGCAGTGGCTCACTATGGCCTATTCTAGAGAAGAAACGAGAGAATTCTTAGCG  
TGGCATTCAAAGCCATCCGGGATCCTAGATTCCAGCTACATTTTCACTCTTCATCCCTTT  
CTCTGCATATTTCTTAGAATGT

>2404

ACTATGGCCTATTCTAGAGAAGAAACGAGAGAATTCTTAGCGTGGCATTCAAAGCCATC  
CGGGATCCTAGATTCCAGCTACATTTTCACTCTTCATCCCTTTCTCTGCATATTTCTTAGA  
ATGTACACCCCTGAAGGCAG

>2405

CAAAGCCATCCGGGATCCTAGATTCCAGCTACATTTTCACTCTTCATCCCTTTCTCTGCA  
TATTTCTTAGAATGTACACCCCTGAAGGCAGGGACCATCTTTTTCACATCTGTGTTACA  
ACCTTTTAGTCCACTCTCTAG

>2406

CTAGATTCCAGCTACATTTTCACTCTTCATCCCTTTCTCTGCATATTTCTTAGAATGTACA  
CCCCTGAAGGCAGGGACCATCTTTTTCACATCTGTGTTACAACCTTTTAGTCCACTCTC  
TAGCATATGGCAACTCAGCA

>2407

CATATTTCTTAGAATGTACACCCCTGAAGGCAGGGACCATCTTTTTCACATCTGTGTTAC  
AACCTTTTAGTCCACTCTCTAGCATATGGCAACTCAGCAGATGCTGCTGTTGAGTAAAC  
TCTTATGCTTCCCTTCCCATG

>2408

AATGTACACCCCTGAAGGCAGGGACCATCTTTTTCACATCTGTGTTACAACCTTTTAGT  
CCACTCTCTAGCATATGGCAACTCAGCAGATGCTGCTGTTGAGTAAACTCTTATGCTTC  
CCTTCCCATGCCATATCCTTCT

>2409

TTCACATCTGTGTTACAACCTTTTAGTCCACTCTCTAGCATATGGCAACTCAGCAGATGC  
TGCTGTTGAGTAAACTCTTATGCTTCCCTTCCCATGCCATATCCTTCTCTGGTCATCGCA  
ACAGGGCCAAATCTCTCATG

>2410

AGATGCTGCTGTTGAGTAAACTCTTATGCTTCCCTTCCCATGCCATATCCTTCTCTGGTC  
ATCGCAACAGGGCCAAATCTCTCATGCTTCAGTGTAATGCCCTCTCCTTGCAGCATCC  
TTTCCTGGGGCATTCTTCCTC

>2411

CTTATGCTTCCCTTCCCATGCCATATCCTTCTCTGGTCATCGCAACAGGGCCAAATCTCT  
CATGCTTCAGTGTAATGCCCTCTCCTTGCAGCATCCTTTTCCTGGGGCATTCTTCCTCCT  
TGCATCCAGTTGGAAATAAT

>2412

ATATCCTTCTCTGGTCATCGCAACAGGGCCAAATCTCTCATGCTTCAGTGTAATGCCCT  
CTCCTTGCAGCATCCTTTTCCTGGGGCATTCTTCCTCCTTGCATCCAGTTGGAAATAATAT  
GTCCCTCCATTGGAGCTCCC

>2413

TCATGCTTCAGTGTAATGCCCTCTCCTTGCAGCATCCTTTTCCTGGGGCATTCTTCCTCC  
TTGCATCCAGTTGGAAATAATATGTCCCTCCATTGGAGCTCCCACACCAGAAGAGGTAT  
AGATAAAGCCAGATACTTCTT

>2414

TGCAGCATCCTTTTCCTGGGGCATTCTTCCTCCTTGCATCCAGTTGGAAATAATATGTCCC  
TCCATTGGAGCTCCCACACCAGAAGAGGTATAGATAAAGCCAGATACTTCTTTTTTTTTT  
TTTTTTTTTTTGATACAGAGTC

>2415

GGGCATTCTTCCTCCTTGCATCCAGTTGGAAATAATATGTCCCTCCATTGGAGCTCCCAC  
ACCAGAAGAGGTATAGATAAAGCCAGATACTTCTTTTTTTTTTTTTTTTTTTTGATACAGA  
GTCTCACTCTGTTGCCCAGG

>2416

TCTTCCTCCTTGCATCCAGTTGGAAATAATATGTCCCTCCATTGGAGCTCCCACACCAG  
AAGAGGTATAGATAAAGCCAGATACTTCTTTTTTTTTTTTTTTTTTTTGATACAGAGTCTC  
ACTCTGTTGCCCAGGCTGGAG

>2417

TCCTTGCATCCAGTTGGAAATAATATGTCCCTCCATTGGAGCTCCCACACCAGAAGAGG  
TATAGATAAAGCCAGATACTTCTTTTTTTTTTTTTTTTTTTTGATACAGAGTCTCACTCTGT  
TGCCCAGGCTGGAGTGTAGT

>2418

GGAGCTCCCACACCAGAAGAGGTATAGATAAAGCCAGATACTTCTTTTTTTTTTTTTTTTT  
TTTGATACAGAGTCTCACTCTGTTGCCCAGGCTGGAGTGTAGTGGCATGAACTTGGCTC  
ACTGCAGCCTCTGCCTCTTGG

>2419

GGTATAGATAAAGCCAGATACTTCTTTTTTTTTTTTTTTTTTTTGATACAGAGTCTCACTCT  
GTTGCCCAGGCTGGAGTGTAGTGGCATGAACTTGGCTCACTGCAGCCTCTGCCTCTTG  
GGTTCAAGTGATTCTTGCGTC

>2420

ATAAAGCCAGATACTTCTTTTTTTTTTTTTTTTTTTTGATACAGAGTCTCACTCTGTTGCCC  
AGGCTGGAGTGTAGTGGCATGAACTTGGCTCACTGCAGCCTCTGCCTCTTGGGTTCAA  
GTGATTCTTGCGTCTCAGCCT

>2421

TTTTTTTGATACAGAGTCTCACTCTGTTGCCCAGGCTGGAGTGTAGTGGCATGAACTTG  
GCTCACTGCAGCCTCTGCCTCTTGGGTTCAAGTGATTCTTGCGTCTCAGCCTCCCGAGT  
AGCTGAGATTACAGACATGCGC

>2422

CTCTGTTGCCCAGGCTGGAGTGTAGTGGCATGAACTTGGCTCACTGCAGCCTCTGCCT  
CTTGGGTTCAAGTGATTCTTGCGTCTCAGCCTCCCGAGTAGCTGAGATTACAGACATGC  
GCTACCATGCCTGGCTAATTTTT

>2423

GAGTGTAGTGGCATGAACTTGGCTCACTGCAGCCTCTGCCTCTTGGGTTCAAGTGATTC  
TTGCGTCTCAGCCTCCCGAGTAGCTGAGATTACAGACATGCGCTACCATGCCTGGCTAA  
TTTTTGTATTTTAGTAGAGAT

>2424

GGCATGAACTTGGCTCACTGCAGCCTCTGCCTCTTGGGTTCAAGTGATTCTTGCGTCTC  
AGCCTCCCGAGTAGCTGAGATTACAGACATGCGCTACCATGCCTGGCTAATTTTTGTATT  
TTTAGTAGAGATGCGGTTTCA

>2425

GTCTCAGCCTCCCGAGTAGCTGAGATTACAGACATGCGCTACCATGCCTGGCTAATTTT  
TGATTTTTTAGTAGAGATGCGGTTTCACCATGCTGGCCAGGCTGGTCCCCAACTCCTCG  
CCTCAAGTGATCTTCCTGCCTT

>2426

TCAGCCTCCCGAGTAGCTGAGATTACAGACATGCGCTACCATGCCTGGCTAATTTTTGT  
ATTTTAGTAGAGATGCGGTTTCACCATGCTGGCCAGGCTGGTCCCCAACTCCTCGCCT  
CAAGTGATCTTCCTGCCTTAGC

>2427

TTTTTGTATTTTAGTAGAGATGCGGTTTCACCATGCTGGCCAGGCTGGTCCCCAACTC  
CTCGCCTCAAGTGATCTTCCTGCCTTAGCCTCCCAGAGTGCTAGGATTACAGGTGTGAG  
TCACTGTGCCCCGGCCTGGATCT

>2428

GAGATGCGGTTTCACCATGCTGGCCAGGCTGGTCCCCAACTCCTCGCCTCAAGTGATC  
TTCCTGCCTTAGCCTCCCAGAGTGCTAGGATTACAGGTGTGAGTCACTGTGCCCGGCCT  
GGATCTTTTATTGTTTGTATTTC

>2429

CAGGCTGGTCCCCAACTCCTCGCCTCAAGTGATCTTCCTGCCTTAGCCTCCCAGAGTGC  
TAGGATTACAGGTGTGAGTCACTGTGCCCCGGCCTGGATCTTTTATTGTTTGTATTTCTGT  
TCATTTCTTCCCTAAGAAACC

>2430

GTCCCCAACTCCTCGCCTCAAGTGATCTTCCTGCCTTAGCCTCCCAGAGTGCTAGGATT  
ACAGGTGTGAGTCACTGTGCCCCGGCCTGGATCTTTTATTGTTTGTATTTCTGTTCAATTC  
TTCCCTAAGAAACCCACGTT

>2431

TACAGGTGTGAGTCACTGTGCCCCGGCCTGGATCTTTTATTGTTTGTATTTCTGTTCAATTC  
CTTCCCTAAGAAACCCACGTTTTTGTGGGCAGGACCTGGAATCCTATTTCAGTTATACA  
GCCCCGCTTCGTCCACTGCTC

>2432

GGCCTGGATCTTTTATTGTTTGTATTCTGTTCATTTCTTCCCTAAGAAACCCACGTTTT  
TGTGGGCAGGACCTGGAATCCTATTTCAGTTATACAGCCCCGCTTCGTCCACTGCTCCCC  
TTCAGAGTCTAGTGCCCTGG

>2433

TTGTATTTCTGTTCATTTCTTCCCTAAGAAACCCACGTTTTTGTGGGCAGGACCTGGA  
ATCCTATTTCAGTTATACAGCCCCGCTTCGTCCACTGCTCCCCCTTCAGAGTCTAGTGCCCT  
GGACATCATAGGTATTCAGTA

>2434

CGTTTTTGTGGGCAGGACCTGGAATCCTATTTCAGTTATACAGCCCCGCTTCGTCCACTG  
CTCCCCCTTCAGAGTCTAGTGCCCTGGACATCATAGGTATTCAGTACCTCTTGCTGGCTTA  
GGAACAGGAGGATGCCTGATG

>2435

TTTTTGTGGGCAGGACCTGGAATCCTATTTCAGTTATACAGCCCCGCTTCGTCCACTGCT  
CCCCCTTCAGAGTCTAGTGCCCTGGACATCATAGGTATTCAGTACCTCTTGCTGGCTTAG  
GAACAGGAGGATGCCTGATGGC

>2436

AGTTATACAGCCCCGCTTCGTCCACTGCTCCCCCTTCAGAGTCTAGTGCCCTGGACATCA  
TAGGTATTTCAGTACCTCTTGCTGGCTTAGGAACAGGAGGATGCCTGATGGCCAGGGTG  
TTCCTCTGAAGCAGTGGTGGCTG

>2437

CGTCCACTGCTCCCCCTTCAGAGTCTAGTGCCCTGGACATCATAGGTATTCAGTACCTCT  
TGCTGGCTTAGGAACAGGAGGATGCCTGATGGCCAGGGTGTTCCCTCTGAAGCAGTGGT  
GGCTGAGCTTTTTGAATATCTGC

>2438

CTGCTCCCCCTTCAGAGTCTAGTGCCCTGGACATCATAGGTATTCAGTACCTCTTGCTGG  
CTTAGGAACAGGAGGATGCCTGATGGCCAGGGTGTTCCCTCTGAAGCAGTGGTGGCTGA  
GCTTTTTGAATATCTGCATTGTG

>2439

AGTGCCCTGGACATCATAGGTATTCAGTACCTCTTGCTGGCTTAGGAACAGGAGGATGC  
CTGATGGCCAGGGTGTTCCCTCTGAAGCAGTGGTGGCTGAGCTTTTTGAATATCTGCATT  
GTGCTAAGGGTTAACTACCCAG

>2440

CCTCTTGCTGGCTTAGGAACAGGAGGATGCCTGATGGCCAGGGTGTTCCCTCTGAAGCA  
GTGGTGGCTGAGCTTTTTGAATATCTGCATTGTGCTAAGGGTTAACTACCCAGGCAGTA  
CTGGTGGGGAAGGGCCCCAGAAG

>2441

TGCCTGATGGCCAGGGTGTTCCCTCTGAAGCAGTGGTGGCTGAGCTTTTTGAATATCTGC  
ATTGTGCTAAGGGTTAACTACCCAGGCAGTACTGGTGGGGAAGGGCCCCAGAAGCAG  
GCCAGACTCAGGTATTGTTAAAG

>2442

GGTGTTCCCTCTGAAGCAGTGGTGGCTGAGCTTTTTGAATATCTGCATTGTGCTAAGGGT  
TAACTACCCAGGCAGTACTGGTGGGGAAGGGCCCCAGAAGCAGGCCAGACTCAGGT  
ATTGTTAAAGCAGAGTCATCTTTG

>2443

TGGTGGCTGAGCTTTTTGAATATCTGCATTGTGCTAAGGGTAACTACCCAGGCAGTAC  
TGGTGGGGAAGGGCCCCAGAAGCAGGCCCAGACTCAGGTATTGTAAAGCAGAGTCA  
TCTTTGCTCTGAAGTTTTTTCTTT

>2444

GAGCTTTTTGAATATCTGCATTGTGCTAAGGGTAACTACCCAGGCAGTACTGGTGGGG  
AAGGGCCCCAGAAGCAGGCCCAGACTCAGGTATTGTAAAGCAGAGTCATCTTTGCTC  
TGAAGTTTTTTCTTTTATCTTTT

>2445

TATCTGCATTGTGCTAAGGGTAACTACCCAGGCAGTACTGGTGGGGAAGGGCCCCAG  
AAGCAGGCCCAGACTCAGGTATTGTAAAGCAGAGTCATCTTTGCTCTGAAGTTTTTTC  
TTTTATCTTTTCTTTTCTTTTTT

>2446

GGTGGGGAAGGGCCCCAGAAGCAGGCCCAGACTCAGGTATTGTAAAGCAGAGTCAT  
CTTTGCTCTGAAGTTTTTTCTTTTATCTTTTCTTTTCTTTTTTAATTGGGGGAAACCTTGT  
CCTAATTGGCATCTTTATTGTG

>2447

TTCTTTTATCTTTTCTTTTCTTTTTTAATTGGGGGAAACCTTGTCTTAATTGGCATCTTTA  
TTGTGGCAGGAATAGGCCAGGCAGGGCTGGGGGAGTGTGAAGTCTGTGAAGGGAGGT  
GGCCTGGGGGCCCCCCCCACACA

>2448

TATCTTTTCTTTTCTTTTTTAATTGGGGGAAACCTTGTCTTAATTGGCATCTTTATTGTGG  
CAGGAATAGGCCAGGCAGGGCTGGGGGAGTGTGAAGTCTGTGAAGGGAGGTGGCCTG  
GGGGCCCCCCCCACACAATGCCT

>2449

GGAAACCTTGTCTTAATTGGCATCTTTATTGTGGCAGGAATAGGCCAGGCAGGGCTGG  
GGGAGTGTGAAGTCTGTGAAGGGAGGTGGCCTGGGGGCCCCCCCCACACAATGCCTGA  
TTGTGCAGGCATAGGTATGAACACA

>2450

GTCCTAATTGGCATCTTTATTGTGGCAGGAATAGGCCAGGCAGGGCTGGGGGAGTGTG  
AAGTCTGTGAAGGGAGGTGGCCTGGGGGCCCCCCCCACACAATGCCTGATTGTGCAGG  
CATAGGTATGAACACATTGCAGCCT

>2451

TAATTGGCATCTTTATTGTGGCAGGAATAGGCCAGGCAGGGCTGGGGGAGTGTGAAGT  
CTGTGAAGGGAGGTGGCCTGGGGGCCCCCCCCACACAATGCCTGATTGTGCAGGCATAG  
GTATGAACACATTGCAGCCTGTGT

>2452

GCTGGGGGAGTGTGAAGTCTGTGAAGGGAGGTGGCCTGGGGGCCCCCCCCACACAATG  
CCTGATTGTGCAGGCATAGGTATGAACACATTGCAGCCTGTGTGCACCCACAGGGTGA  
CCACGAGCAAGGCCTGGGGACGAGG

>2453

AAGGGAGGTGGCCTGGGGGCCCCCCCCACACAATGCCTGATTGTGCAGGCATAGGTATG  
AACACATTGCAGCCTGTGTGCACCCACAGGGTGACCACGAGCAAGGCCTGGGGACGA  
GGACTACGAGGCCTGCAGCTGGGTC

>2454

GGCCCCCCCACACAATGCCTGATTGTGCAGGCATAGGTATGAACACATTGCAGCCTGT  
GTGCACCCACAGGGTGACCACGAGCAAGGCCTGGGGACGAGGACTACGAGGCCTGC  
AGCTGGGTCCTCTTTTCTCCCTCCTC

>2455

GCCTGATTGTGCAGGCATAGGTATGAACACATTGCAGCCTGTGTGCACCCACAGGGTG  
ACCACGAGCAAGGCCTGGGGACGAGGACTACGAGGCCTGCAGCTGGGTCTCTTTTC  
TCCCTCCTCACCCCCACCCAGTACC

>2456

ATGAACACATTGCAGCCTGTGTGCACCCACAGGGTGACCACGAGCAAGGCCTGGGGA  
CGAGGACTACGAGGCCTGCAGCTGGGTCTCTTTTCTCCCTCCTCACCCCCACCCAGT  
ACCCACGTGATTGGGCCACATCCCA

>2457

ATTGCAGCCTGTGTGCACCCACAGGGTGACCACGAGCAAGGCCTGGGGACGAGGACT  
ACGAGGCCTGCAGCTGGGTCTCTTTTCTCCCTCCTCACCCCCACCCAGTACCCACGT  
GATTGGGCCACATCCCAGTAACAAG

>2458

CAAGGCCTGGGGACGAGGACTACGAGGCCTGCAGCTGGGTCTCTTTTCTCCCTCCTC  
ACCCCCACCCAGTACCCACGTGATTGGGCCACATCCCAGTAACAAGCAGTCCTTGTGG  
AAGAGCCTTCATGAAGACCTTTGC

>2459

CCTGCAGCTGGGTCCTCTTTTCTCCCTCCTCACCCCCACCCAGTACCCACGTGATTGGG  
CCACATCCCAGTAACAAGCAGTCCTTGTGGAAGAGCCTTCATGAAGACCTTTGCTGGG  
AGTGGCGGGCAGGGATCTGCGGG

>2460

CTGGGTCCTCTTTTCTCCCTCCTCACCCCCACCCAGTACCCACGTGATTGGGCCACATC  
CCAGTAACAAGCAGTCCTTGTGGAAGAGCCTTCATGAAGACCTTTGCTGGGAGTGGCG  
GGCAGGGATCTGCGGGGAGCGTT

>2461

CCACCCAGTACCCACGTGATTGGGCCACATCCCAGTAACAAGCAGTCCTTGTGGAAGA  
GCCTTCATGAAGACCTTTGCTGGGAGTGGCGGGCAGGGATCTGCGGGGAGCGTTGCT  
GGTTCAAGCTGGGGCTTTCCTATGG

>2462

CGTGATTGGGCCACATCCCAGTAACAAGCAGTCCTTGTGGAAGAGCCTTCATGAAGAC  
CTTTGCTGGGAGTGGCGGGCAGGGATCTGCGGGGAGCGTTGCTGGTTCAAGCTGGGG  
CTTTCCTATGGATGATGTCCTGTGA

>2463

CCACATCCCAGTAACAAGCAGTCCTTGTGGAAGAGCCTTCATGAAGACCTTTGCTGGG  
AGTGGCGGGCAGGGATCTGCGGGGAGCGTTGCTGGTTCAAGCTGGGGCTTTCCTATGG  
ATGATGTCCTGTGAAGGGTAGATC

>2464

CAAGCAGTCCTTGTGGAAGAGCCTTCATGAAGACCTTTGCTGGGAGTGGCGGGCAGG  
GATCTGCGGGGAGCGTTGCTGGTTCAAGCTGGGGCTTTCCTATGGATGATGTCCTGTGA  
AGGGTAGATCCTGGAGGGACAGAC

>2465

GCGGGCAGGGATCTGCGGGGAGCGTTGCTGGTTCAAGCTGGGGCTTTCCTATGGATGA  
TGTCCTGTGAAGGGTAGATCCTGGAGGGACAGACAGGTGTCTGATCTTTGGCAGGCAG  
GGATGTCTCATTGTACATTATAG

>2466

CAGGGATCTGCGGGGAGCGTTGCTGGTTCAAGCTGGGGCTTTCCTATGGATGATGTCCT  
GTGAAGGGTAGATCCTGGAGGGACAGACAGGTGTCTGATCTTTGGCAGGCAGGGATG  
TCTCATTGTACATTATAGGTATT

>2467

GCTTTCCTATGGATGATGTCCTGTGAAGGGTAGATCCTGGAGGGACAGACAGGTGTCT  
GATCTTTGGCAGGCAGGGATGTCTCATTGTACATTATAGGTATTCAGTATCTCTTGCTG  
GCTTAGGCTTCATAATGTCTCA

>2468

TCCTATGGATGATGTCCTGTGAAGGGTAGATCCTGGAGGGACAGACAGGTGTCTGATC  
TTTGGCAGGCAGGGATGTCTCATTGTACATTATAGGTATTCAGTATCTCTTGCTGGCTT  
AGGCTTCATAATGTCTCATTG

>2469

GGTAGATCCTGGAGGGACAGACAGGTGTCTGATCTTTGGCAGGCAGGGATGTCTCATT  
TGACATTATAGGTATTCAGTATCTCTTGCTGGCTTAGGCTTCATAATGTCTCATTGTAC  
ATCATAGCCTTCAGTACCTCT

>2470

GTCTGATCTTTGGCAGGCAGGGATGTCTCATTGTACATTATAGGTATTCAGTATCTCTT  
GCTGGCTTAGGCTTCATAATGTCTCATTGTACATCATAGCCTTCAGTACCTCTTGCTGA  
TTTGGTTAACCCAGTTGTTA

>2471

TTTGTACATTATAGGTATTCAGTATCTCTTGCTGGCTTAGGCTTCATAATGTCTCATTGT  
ACATCATAGCCTTCAGTACCTCTTGCTGATTGGTTAACCCAGTTGTTATACCACGATAT  
TGATTTTTCATGCCATTTT

>2472

ATTATAGGTATTCAGTATCTCTTGCTGGCTTAGGCTTCATAATGTCTCATTGTACATCAT  
AGCCTTCAGTACCTCTTGCTGATTGGTTAACCCAGTTGTTATACCACGATATTGATTTT  
TCATGCCATTTCTTTAGG

>2473

GTACCTCTTGCTGATTGGTTAACCCAGTTGTTATACCACGATATTGATTTTTCATGCCAT  
TTTCTTTAGGAAGATTGGAAGATCATTGAGGATAGGGACTGTGACCTTTCTTTTTTTCT  
ACCCAGTACCCAACCTGG

>2474

CTCTTGCTGATTGGTTAACCCAGTTGTTATACCACGATATTGATTTTTCATGCCATTTTC  
TTTAGGAAGATTGGAAGATCATTGAGGATAGGGACTGTGACCTTTCTTTTTTTCTACC  
CCAGTACCCAACCTGGCAGG

>2475

AACCCAGTTGTTATACCACGATATTGATTTTTCATGCCATTTTCTTTAGGAAGATTGGAA  
GATCATTGAGGATAGGGACTGTGACCTTTCTTTTTTTCTACCCAGTACCCAACCTGG  
CAGGTAGCACAGCGCAATGAT

>2476

AGTTGTTATACCACGATATTGATTTTTCATGCCATTTTCTTTAGGAAGATTGGAAGATCAT  
TGAGGATAGGGACTGTGACCTTTTCTTTTTTCTACCCCAGTACCCAACCTGGCAGGTA  
GCACAGCGCAATGATCCACG

>2477

CATTTTCTTTAGGAAGATTGGAAGATCATTGAGGATAGGGACTGTGACCTTTTCTTTTTT  
TCTACCCCAGTACCCAACCTGGCAGGTAGCACAGCGCAATGATCCACGATGTTTAATAG  
GTTGAATTGTAGAGGGGGCCT

>2478

GATTGGAAGATCATTGAGGATAGGGACTGTGACCTTTTCTTTTTTCTACCCCAGTACC  
CAACCTGGCAGGTAGCACAGCGCAATGATCCACGATGTTTAATAGGTTGAATTGTAGA  
GGGGGCCTCTGATTCCAAAGATG

>2479

ATCATTGAGGATAGGGACTGTGACCTTTTCTTTTTTCTACCCCAGTACCCAACCTGGC  
AGGTAGCACAGCGCAATGATCCACGATGTTTAATAGGTTGAATTGTAGAGGGGGCCTCT  
GATTCCAAAGATGGGGGCAGAA

>2480

TTTTCTTTTTTCTACCCCAGTACCCAACCTGGCAGGTAGCACAGCGCAATGATCCACG  
ATGTTTAATAGGTTGAATTGTAGAGGGGGCCTCTGATTCCAAAGATGGGGGCAGAATAT  
CAGTCCTCTCCAGACTGCCTGG

>2481

CTACCCCAGTACCCAACCTGGCAGGTAGCACAGCGCAATGATCCACGATGTTTAATAGG  
TTGAATTGTAGAGGGGGCCTCTGATTCCAAAGATGGGGGCAGAATATCAGTCCTCTCC  
AGACTGCCTGGGAATCCTCCTCT

>2482

CAGGTAGCACAGCGCAATGATCCACGATGTTTAATAGGTTGAATTGTAGAGGGGGCCT  
CTGATTCCAAAGATGGGGGCAGAATATCAGTCCTCTCCAGACTGCCTGGGAATCCTCCT  
CTCTCCAGCCTGGGCCTGGCCAG

>2483

AGCGCAATGATCCACGATGTTTAATAGGTTGAATTGTAGAGGGGGCCTCTGATTCCAAA  
GATGGGGGCAGAATATCAGTCCTCTCCAGACTGCCTGGGAATCCTCCTCTCTCCAGCCT  
GGGCCTGGCCAGTGGGAGACAG

>2484

GATCCACGATGTTTAATAGGTTGAATTGTAGAGGGGGCCTCTGATTCCAAAGATGGGGG  
CAGAATATCAGTCCTCTCCAGACTGCCTGGGAATCCTCCTCTCTCCAGCCTGGGCCTGG  
CCAGTGGGAGACAGAGGCTGCT

>2485

CCTCTGATTCCAAAGATGGGGGCAGAATATCAGTCCTCTCCAGACTGCCTGGGAATCCT  
CCTCTCTCCAGCCTGGGCCTGGCCAGTGGGAGACAGAGGCTGCTGAAGTAGCTGGCA  
AGGAGGCAAAGAAGATGATGACCT

>2486

ATGGGGGCAGAATATCAGTCCTCTCCAGACTGCCTGGGAATCCTCCTCTCTCCAGCCTG  
GGCCTGGCCAGTGGGAGACAGAGGCTGCTGAAGTAGCTGGCAAGGAGGCAAAGAAG  
ATGATGACCTAGCTACGGTCCTCAT



>2487

GCAGAAATATCAGTCCTCTCCAGACTGCCTGGGAATCCTCCTCTCTCCAGCCTGGGCCTG  
GCCAGTGGGAGACAGAGGCTGCTGAAGTAGCTGGCAAGGAGGCAAAGAAGATGATG  
ACCTAGCTACGGTCCTCATGTGCCC

>2488

CTCCAGACTGCCTGGGAATCCTCCTCTCTCCAGCCTGGGCCTGGCCAGTGGGAGACAG  
AGGCTGCTGAAGTAGCTGGCAAGGAGGCAAAGAAGATGATGACCTAGCTACGGTCCT  
CATGTGCCCACTGGGGAATCATCTT

>2489

TGGGCCTGGCCAGTGGGAGACAGAGGCTGCTGAAGTAGCTGGCAAGGAGGCAAAGA  
AGATGATGACCTAGCTACGGTCCTCATGTGCCCACTGGGGAATCATCTTTTTGCATCTG  
AGTTAGTCAATGTGCTGTGCATTCT

>2490

AGGCAAAGAAGATGATGACCTAGCTACGGTCCTCATGTGCCCACTGGGGAATCATCTT  
TTTTGCATCTGAGTTAGTCAATGTGCTGTGCATTCTCTGCAGAATTTGTGAACCTGGTATA  
GGTATGAGGTGAGAGAGGCCAG

>2491

TCCTCATGTGCCCACTGGGGAATCATCTTTTTGCATCTGAGTTAGTCAATGTGCTGTGCA  
TTCTCTGCAGAATTTGTGAACCTGGTATAGGTATGAGGTGAGAGAGGCCAGGAGGTCT  
GGCTGCTCCCCCTCTAGACTTC

>2492

AATCATCTTTTTGCATCTGAGTTAGTCAATGTGCTGTGCATTCTCTGCAGAATTTGTGAA  
CCTGGTATAGGTATGAGGTGAGAGAGGCCAGGAGGTCTGGCTGCTCCCCCTCTAGACT  
TCGCAGGTAAAACCCAAGGTGT

>2493

CTGAGTTAGTCAATGTGCTGTGCATTCTCTGCAGAATTTGTGAACCTGGTATAGGTATG  
AGGTGAGAGAGGCCAGGAGGTCTGGCTGCTCCCCCTCTAGACTTCGCAGGTAAAACC  
CAAGGTGTGTGCCACGTAAAGGTT

>2494

TTAGTCAATGTGCTGTGCATTCTCTGCAGAATTTGTGAACCTGGTATAGGTATGAGGTG  
AGAGAGGCCAGGAGGTCTGGCTGCTCCCCCTCTAGACTTCGCAGGTAAAACCCAAGG  
TGTGTGCCACGTAAAGGTTTCAGAG

>2495

GTCAATGTGCTGTGCATTCTCTGCAGAATTTGTGAACCTGGTATAGGTATGAGGTGAGA  
GAGGCCAGGAGGTCTGGCTGCTCCCCCTCTAGACTTCGCAGGTAAAACCCAAGGTGT  
GTGCCACGTAAAGGTTTCAGAGGTT

>2496

TGCAGAATTTGTGAACCTGGTATAGGTATGAGGTGAGAGAGGCCAGGAGGTCTGGCTG  
CTCCCCCTCTAGACTTCGCAGGTAAAACCCAAGGTGTGTGCCACGTAAAGGTTTCAGAG  
GTTTTATAGGCATCCAGATAGCAC

>2497

ATAGGTATGAGGTGAGAGAGGCCAGGAGGTCTGGCTGCTCCCCCTCTAGACTTCGCAG  
GTAAAACCCAAGGTGTGTGCCACGTAAAGGTTTCAGAGGTTTTATAGGCATCCAGATAG  
CACATGTGGGTCTCTGCCCCTGCT

>2498

GAGGCCAGGAGGTCTGGCTGCTCCCCCTCTAGACTTCGCAGGTAAAACCCAAGGTGT  
GTGCCACGTAAAGGTTTCAGAGGTTTTATAGGCATCCAGATAGCACATGTGGGTCTCTGC  
CCCTGCTTGCAGCCTCCCTGGGGC

>2499

AGGAGGTCTGGCTGCTCCCCCTCTAGACTTCGCAGGTAAAACCCAAGGTGTGTGCCAC  
GTAAAGGTTTCAGAGGTTTTATAGGCATCCAGATAGCACATGTGGGTCTCTGCCCCTGCT  
TGCAGCCTCCCTGGGGCAGCCAG

>2500

CTGCTCCCCCTCTAGACTTCGCAGGTAAAACCCAAGGTGTGTGCCACGTAAAGGTTCA  
GAGGTTTTATAGGCATCCAGATAGCACATGTGGGTCTCTGCCCCTGCTTGCAGCCTCCC  
TGGGGCAGCCAGCCAGGCTCAGG

>2501

TGCCACGTAAAGGTTTCAGAGGTTTTATAGGCATCCAGATAGCACATGTGGGTCTCTGCC  
CCTGCTTGCAGCCTCCCTGGGGCAGCCAGCCAGGCTCAGGGCAGGAAGCTGCTGATT  
CTGGGTCACTTGGCTGCTCTTGCT

>2502

TCAGAGGTTTTATAGGCATCCAGATAGCACATGTGGGTCTCTGCCCCTGCTTGCAGCCT  
CCCTGGGGCAGCCAGCCAGGCTCAGGGCAGGAAGCTGCTGATTCTGGGTCACTTGGC  
TGCTCTTGCTTGCTGCTGCTGTGA

>2503

TTTATAGGCATCCAGATAGCACATGTGGGTCTCTGCCCCTGCTTGCAGCCTCCCTGGGG  
CAGCCAGCCAGGCTCAGGGCAGGAAGCTGCTGATTCTGGGTCACTTGGCTGCTCTTGC  
TTGCTGCTGCTGTGATTGTTCT

>2504

AGGGCAGGAAGCTGCTGATTCTGGGTCACTTGGCTGCTCTTGCTTGCTGCTGCTGTGA  
TTGTTCTACAGTTAAGATCTTAGCTCCATAAGGGACATACGGAGGTCATCTAGGTCAT  
CTCATGGCTCTCAGGCAAGAAAA

>2505

AGGAAGCTGCTGATTCTGGGTCACTTGGCTGCTCTTGCTTGCTGCTGCTGTGATTGTTT  
CTACAGTTAAGATCTTAGCTCCATAAGGGACATACGGAGGTCATCTAGGTCATCTCATG  
GCTCTCAGGCAAGAAAAGTAGC

>2506

TGGGTCACTTGGCTGCTCTTGCTTGCTGCTGCTGTGATTGTTCTACAGTTAAGATCTTA  
GCTCCATAAGGGACATACGGAGGTCATCTAGGTCATCTCATGGCTCTCAGGCAAGAAA  
AGTAGCATTATTGCTCTCATGC

>2507

CTGCTCTTGCTTGCTGCTGCTGTGATTGTTCTACAGTTAAGATCTTAGCTCCATAAGGG  
ACATACGGAGGTCATCTAGGTCATCTCATGGCTCTCAGGCAAGAAAAGTAGCATTATTG  
CTCTCATGCCCACTTTATGGA

>2508

CTTGCTGCTGCTGTGATTGTTCTACAGTTAAGATCTTAGCTCCATAAGGGACATACGG  
AGGTCATCTAGGTCATCTCATGGCTCTCAGGCAAGAAAAGTAGCATTATTGCTCTCATG  
CCCACTTTATGGATAAGTGACC

>2509

TTCCTACAGTTAAGATCTTAGCTCCATAAGGGACATACGGAGGTCATCTAGGTCATCTCA  
TGGCTCTCAGGCAAGAAAAGTAGCATTATTGCTCTCATGCCCACTTTATGGATAAGTGA  
CCGAGGCCTGCAGAGGCAGAG

>2510

TCTAGGTCATCTCATGGCTCTCAGGCAAGAAAAGTAGCATTATTGCTCTCATGCCCACT  
TTATGGATAAGTGACCGAGGCCTGCAGAGGCAGAGTGGCTATTCCAGCCATTAAATGT  
GGCTCCCTGCTATTCTGTTCCCT

>2511

ATCTCATGGCTCTCAGGCAAGAAAAGTAGCATTATTGCTCTCATGCCCACTTTATGGATA  
AGTGACCGAGGCCTGCAGAGGCAGAGTGGCTATTCCAGCCATTAAATGTGGCTCCCTG  
CTATTCTGTTCCCTGCCAGGAT

>2512

GCATTATTGCTCTCATGCCCACTTTATGGATAAGTGACCGAGGCCTGCAGAGGCAGAGT  
GGCTATTCCAGCCATTAAATGTGGCTCCCTGCTATTCTGTTCCCTGCCAGGATATTCTGT  
GGATGGTTAGGGGAGGGGTCT

>2513

GAGGCCTGCAGAGGCAGAGTGGCTATTCCAGCCATTAAATGTGGCTCCCTGCTATTCTG  
TTCCCTGCCAGGATATTCTGTGGATGGTTAGGGGAGGGGTCTTACCTCAGCTAACGAGG  
TGCATTTTCTGTGGGGTGAGGC

>2514

GGCTATTCCAGCCATTAAATGTGGCTCCCTGCTATTCTGTTCCCTGCCAGGATATTCTGT  
GGATGGTTAGGGGAGGGGTCTTACCTCAGCTAACGAGGTGCATTTTCTGTGGGGTGAG  
GCCATTCTTGTCACCTTAGGTGT

>2515

TTCCAGCCATTAAATGTGGCTCCCTGCTATTCTGTTCCCTGCCAGGATATTCTGTGGATG  
GTTAGGGGAGGGGTCTTACCTCAGCTAACGAGGTGCATTTTCTGTGGGGTGAGGCCAT  
TCTTGTCACCTTAGGTGTCTGAG

>2516

TGTGGCTCCCTGCTATTCTGTTCCCTGCCAGGATATTCTGTGGATGGTTAGGGGAGGGG  
TCTTACCTCAGCTAACGAGGTGCATTTTCTGTGGGGTGAGGCCATTCTTGTCACCTTAGG  
TGTCTGAGGCCTGATGGTGTG

>2517

AGGATATTCTGTGGATGGTTAGGGGAGGGGTCTTACCTCAGCTAACGAGGTGCATTTTC  
TGTGGGGTGAGGCCATTCTTGTCACCTTAGGTGTCTGAGGCCTGATGGTGTGGGGAAT  
GTCCTGGTTCTATTCCCAGGGCT

>2518

TTAGGGGAGGGGTCTTACCTCAGCTAACGAGGTGCATTTTCTGTGGGGTGAGGCCATT  
CTTGTCACCTTAGGTGTCTGAGGCCTGATGGTGTGGGGAATGTCCTGGTTCTATTCCCA  
GGGCTGTAACGTGGGGGAAGGAT

>2519

GGGTCTTACCTCAGCTAACGAGGTGCATTTTCTGTGGGGTGAGGCCATTCTTGTCACCTT  
AGGTGTCTGAGGCCTGATGGTGTGGGGAATGTCCTGGTTCTATTCCCAGGGCTGTAAC  
GTGGGGGAAGGATGGAGGAAGA

>2520  
TGAGGCCATTCTTGTCACTTAGGTGTCTGAGGCCTGATGGTGTTGGGGAATGTCCTGGT  
TCTATTCCCAGGGCTGTAACTGAGGGAAGGATGGAGGAAGACAGAATGGCCTCTGG  
AACTTTTGGATCTTTCTGAGTTGA

>2521  
TAGGTGTCTGAGGCCTGATGGTGTTGGGGAATGTCCTGGTTCTATTCCCAGGGCTGTAA  
CGTGGGGAAGGATGGAGGAAGACAGAATGGCCTCTGGAACCTTTTGGATCTTTCTGA  
GTTGAGGCCTTGTCTGGCCAACTC

>2522  
CTGAGGCCTGATGGTGTTGGGGAATGTCCTGGTTCTATTCCCAGGGCTGTAACTGGG  
GGAAGGATGGAGGAAGACAGAATGGCCTCTGGAACCTTTTGGATCTTTCTGAGTTGAGG  
CCTTGTCTGGCCAACTCCGGGAGG

>2523  
CCAGGGCTGTAACTGAGGGAAGGATGGAGGAAGACAGAATGGCCTCTGGAACCTTTT  
GGATCTTTCTGAGTTGAGGCCTTGTCTGGCCAACTCCGGGAGGCTGCTGGCATGGCAA  
GCAGGGTAGGGATGCCTGGCCTAGC

>2524  
GCTGTAACTGAGGGAAGGATGGAGGAAGACAGAATGGCCTCTGGAACCTTTTGGATC  
TTTCTGAGTTGAGGCCTTGTCTGGCCAACTCCGGGAGGCTGCTGGCATGGCAAGCAGG  
GTAGGGATGCCTGGCCTAGCCAGG

>2525  
GGAAGACAGAATGGCCTCTGGAACCTTTTGGATCTTTCTGAGTTGAGGCCTTGTCTGGC  
CAACTCCGGGAGGCTGCTGGCATGGCAAGCAGGGTAGGGATGCCTGGCCTAGCCAGG  
GGAGCTCCCTCTCTCCCCTCTGCTG

>2526  
CTGGAACCTTTTGGATCTTTCTGAGTTGAGGCCTTGTCTGGCCAACTCCGGGAGGCTGC  
TGGCATGGCAAGCAGGGTAGGGATGCCTGGCCTAGCCAGGGGAGCTCCCTCTCTCCCC  
TCTGCTGCCCCTCTTTCCACCCCC

>2527  
GTTGAGGCCTTGTCTGGCCAACTCCGGGAGGCTGCTGGCATGGCAAGCAGGGTAGGG  
ATGCCTGGCCTAGCCAGGGGAGCTCCCTCTCTCCCCTCTGCTGCCCCTCTTTCCACCCC  
CATCATAAACACGTGTGGACTTTC

>2528  
AGGCCTTGTCTGGCCAACTCCGGGAGGCTGCTGGCATGGCAAGCAGGGTAGGGATGC  
CTGGCCTAGCCAGGGGAGCTCCCTCTCTCCCCTCTGCTGCCCCTCTTTCCACCCCCATC  
ATAAACACGTGTGGACTTTCTGGT

>2529  
TCCCTCTCTCCCCTCTGCTGCCCCTCTTTCCACCCCCATCATAAACACGTGTGGACTTTC  
TGGTGGTGAGAAGATGGTTTTTGGAGGGCTGGGCTGAGGTCTAGGCAGGCAAGAGCTT  
CCAAATGTGTGGCTTTGATTCTC

>2530  
CTCTCTCCCCTCTGCTGCCCCTCTTTCCACCCCCATCATAAACACGTGTGGACTTTCTG  
GTGGTGAGAAGATGGTTTTTGGAGGGCTGGGCTGAGGTCTAGGCAGGCAAGAGCTTCC  
AAATGTGTGGCTTTGATTCTCAGC

>2531

CCCCATCATAAACACGTGTGGACTTTCTGGTGGTGAGAAGATGGTTTTTGGAGGGCTGG  
GCTGAGGTCTAGGCAGGCAAGAGCTTCCAAATGTGTGGCTTTGATTCTCAGCCTTTTCA  
TCCCTCAATCCTGGGAGACTCAT

>2532

ATCATAAACACGTGTGGACTTTCTGGTGGTGAGAAGATGGTTTTTGGAGGGCTGGGCTG  
AGGTCTAGGCAGGCAAGAGCTTCCAAATGTGTGGCTTTGATTCTCAGCCTTTTCATCCC  
TCAATCCTGGGAGACTCATTTTA

>2533

ACACGTGTGGACTTTCTGGTGGTGAGAAGATGGTTTTTGGAGGGCTGGGCTGAGGTCTA  
GGCAGGCAAGAGCTTCCAAATGTGTGGCTTTGATTCTCAGCCTTTTCATCCCTCAATCC  
TGGGAGACTCATTTTAAAACTTA

>2534

GATGGTTTTTGGAGGGCTGGGCTGAGGTCTAGGCAGGCAAGAGCTTCCAAATGTGTGGC  
TTTGATTCTCAGCCTTTTCATCCCTCAATCCTGGGAGACTCATTTTAAAACTTAAAAAA  
GGAATTCATTCTATTGGATGCTA

>2535

GTCTAGGCAGGCAAGAGCTTCCAAATGTGTGGCTTTGATTCTCAGCCTTTTCATCCCTC  
AATCCTGGGAGACTCATTTTAAAACTTAAAAAAGGACTTCATTCTATTGGATGCTATGT  
GGGCAGGCCCTGGGCTGTTGTA

>2536

AATGTGTGGCTTTGATTCTCAGCCTTTTCATCCCTCAATCCTGGGAGACTCATTTTAAAA  
CTTAAAAAAGGACTTCATTCTATTGGATGCTATGTGGGCAGGCCCTGGGCTGTTGTAGA  
GAGGCCTGAAACCCACTTCAG

>2537

CCCTCAATCCTGGGAGACTCATTTTAAAACTTAAAAAAGGACTTCATTCTATTGGATGC  
TATGTGGGCAGGCCCTGGGCTGTTGTAGAGAGGCCTGAAACCCACTTCAGTTTCCTGG  
ACAGGCTGGGAGTGTGTACCCAT

>2538

CTCATTTTAAAACTTAAAAAAGGACTTCATTCTATTGGATGCTATGTGGGCAGGCCCTG  
GGCTGTTGTAGAGAGGCCTGAAACCCACTTCAGTTTCCTGGACAGGCTGGGAGTGTGT  
ACCCATGGGTTCCCTGCTGCCCT

>2539

GACTTCATTCTATTGGATGCTATGTGGGCAGGCCCTGGGCTGTTGTAGAGAGGCCTGAA  
ACCCACTTCAGTTTCCTGGACAGGCTGGGAGTGTGTACCCATGGGTTCCCTGCTGCCCT  
ATTCCTGGAAGACACTAATATC

>2540

TATGTGGGCAGGCCCTGGGCTGTTGTAGAGAGGCCTGAAACCCACTTCAGTTTCCTGG  
ACAGGCTGGGAGTGTGTACCCATGGGTTCCCTGCTGCCCTATTCCTGGAAGACACTAAT  
ATCCCTCCCAAACCTCTTGTTGG

>2541

ACCCACTTCAGTTTCCTGGACAGGCTGGGAGTGTGTACCCATGGGTTCCCTGCTGCCCT  
ATTCCTGGAAGACACTAATATCCCTCCCAAACCTCTTGTTGGTTTCTGCTTTTTTCTGT  
AGCATTTTGTCTTTGTGGGAA

>2542  
GCTGCCCTATTCCTGGAAGACACTAATATCCCTCCCAAACCTCTTGGTTGGTTTCTGCTTT  
TTTTCTGTAGCATTTTGTCTTTGTGGGAAATTTTAAGAAACATATGTATGGCTTTTTGGT  
TTCCACTTATTTATTTTCCC

>2543  
TCTTTGTGGGAAATTTTAAGAAACATATGTATGGCTTTTTGGTTTCCACTTATTTATTTTC  
CCCTCTGAGTTTCAGATTTTCATCCTTCTCCACCCCTTCCCCCTGCCCTAAGGTGGGGCT  
AGTGCAAATCGCAGTGTGTG

>2544  
TGGGAAATTTTAAGAAACATATGTATGGCTTTTTGGTTTCCACTTATTTATTTTCCCCTCT  
GAGTTTCAGATTTTCATCCTTCTCCACCCCTTCCCCCTGCCCTAAGGTGGGGCTAGTGCA  
AATCGCAGTGTGTGTGTAGT

>2545  
TTTCCACTTATTTATTTTCCCCTCTGAGTTTCAGATTTTCATCCTTCTCCACCCCTTCCCC  
TGCCCTAAGGTGGGGCTAGTGCAAATCGCAGTGTGTGTGTAGTGGGATGGTTAAAGAG  
CCGTACATCCTCACACCTGGT

>2546  
TTTATTTTCCCCTCTGAGTTTCAGATTTTCATCCTTCTCCACCCCTTCCCCCTGCCCTAAG  
GTGGGGCTAGTGCAAATCGCAGTGTGTGTGTAGTGGGATGGTTAAAGAGCCGTACATC  
CTCACACCTGGTGACGCAGACT

>2547  
GATTTTCATCCTTCTCCACCCCTTCCCCCTGCCCTAAGGTGGGGCTAGTGCAAATCGCAG  
TGTGTGTGTAGTGGGATGGTTAAAGAGCCGTACATCCTCACACCTGGTGACGCAGACT  
AAGGCAATTAACCTTCTTTAGTA

>2548  
CCACCCCTTCCCCCTGCCCTAAGGTGGGGCTAGTGCAAATCGCAGTGTGTGTGTAGTG  
GGATGGTTAAAGAGCCGTACATCCTCACACCTGGTGACGCAGACTAAGGCAATTAACC  
TTCTTTAGTAAAGACCCTTTCAGC

>2549  
TAGTGCAAATCGCAGTGTGTGTGTAGTGGGATGGTTAAAGAGCCGTACATCCTCACAC  
CTGGTGACGCAGACTAAGGCAATTAACCTTCTTTAGTAAAGACCCTTTCAGCTGGGTG  
CGGTGGGAGGCACTTCGGGAGGCC

>2550  
AGTGGGATGGTTAAAGAGCCGTACATCCTCACACCTGGTGACGCAGACTAAGGCAATT  
AACCTTCTTTAGTAAAGACCCTTTCAGCTGGGTGCGGTGGGAGGCACTTCGGGAGGCC  
GAGGTGGAAGGATTGCTTGAGCCC

>2551  
GATGGTTAAAGAGCCGTACATCCTCACACCTGGTGACGCAGACTAAGGCAATTAACCT  
TCTTTAGTAAAGACCCTTTCAGCTGGGTGCGGTGGGAGGCACTTCGGGAGGCCGAGGT  
GGAAGGATTGCTTGAGCCCTGGAG

>2552  
CACCTGGTGACGCAGACTAAGGCAATTAACCTTCTTTAGTAAAGACCCTTTCAGCTGG  
GTGCGGTGGGAGGCACTTCGGGAGGCCGAGGTGGAAGGATTGCTTGAGCCCTGGAGT  
TGGAGACCAGCTTGGGCAGCATGGT

>2553

AAGGCAATTAACCTTCTTTAGTAAAGACCCTTTCAGCTGGGTGCGGTGGGAGGCACTT  
CGGGAGGCCGAGGTGGAAGGATTGCTTGAGCCCTGGAGTTGGAGACCAGCTTGGGCA  
GCATGGTGAAACCACCTCTCTAAAA

>2554

TTAACCTTCTTTAGTAAAGACCCTTTCAGCTGGGTGCGGTGGGAGGCACTTCGGGAGG  
CCGAGGTGGAAGGATTGCTTGAGCCCTGGAGTTGGAGACCAGCTTGGGCAGCATGGT  
GAAACCACCTCTCTAAAAAAATATA

>2555

TAGTAAAGACCCTTTCAGCTGGGTGCGGTGGGAGGCACTTCGGGAGGCCGAGGTGGA  
AGGATTGCTTGAGCCCTGGAGTTGGAGACCAGCTTGGGCAGCATGGTGAAACCACCT  
CTCTAAAAAAATATAAAAATTAACGG

>2556

TCAGCTGGGTGCGGTGGGAGGCACTTCGGGAGGCCGAGGTGGAAGGATTGCTTGAGC  
CCTGGAGTTGGAGACCAGCTTGGGCAGCATGGTGAAACCACCTCTCTAAAAAAATATA  
AAAATTAACGGGACGTTGTGGCATG

>2557

GGCAGCATGGTGAAACCACCTCTCTAAAAAAATATAAAAATTAACGGGACGTTGTGGC  
ATGCACCTATAGTCCCAGCTACTTGGGAGGCTGGGGCGCGAGAAGTGCTTGAACCTGA  
GAGATGGAGACTGCGGTGAGGCGA

>2558

ATGGTGAAACCACCTCTCTAAAAAAATATAAAAATTAACGGGACGTTGTGGCATGCAC  
CTATAGTCCCAGCTACTTGGGAGGCTGGGGCGCGAGAAGTGCTTGAACCTGAGAGATG  
GAGACTGCGGTGAGGCGAGATTGC

>2559

ACCTCTCTAAAAAAATATAAAAATTAACGGGACGTTGTGGCATGCACCTATAGTCCCAG  
CTACTTGGGAGGCTGGGGCGCGAGAAGTGCTTGAACCTGAGAGATGGAGACTGCGGT  
GAGGCGAGATTGCACCACTGCACT

>2560

AATATAAAAATTAACGGGACGTTGTGGCATGCACCTATAGTCCCAGCTACTTGGGAGGC  
TGGGGCGCGAGAAGTGCTTGAACCTGAGAGATGGAGACTGCGGTGAGGCGAGATTGC  
ACCACTGCACTTCAGCTAGGTGAC

>2561

GACGTTGTGGCATGCACCTATAGTCCCAGCTACTTGGGAGGCTGGGGCGCGAGAAGTG  
CTTGAACCTGAGAGATGGAGACTGCGGTGAGGCGAGATTGCACCACTGCACTTCAGCT  
AGGTGACAGAGTGGGACCCTGTCT

>2562

CCCAGCTACTTGGGAGGCTGGGGCGCGAGAAGTGCTTGAACCTGAGAGATGGAGACT  
GCGGTGAGGCGAGATTGCACCACTGCACTTCAGCTAGGTGACAGAGTGGGACCCTGT  
CTCAAAACAAAACAAAACAACAACAA

>2563

GGGCGCGAGAAGTGCTTGAACCTGAGAGATGGAGACTGCGGTGAGGCGAGATTGCAC  
CACTGCACTTCAGCTAGGTGACAGAGTGGGACCCTGTCTCAAAACAAAACAAAACAA  
CAACAAAAAAGCATGTTTTCTGTCT

>2564

GTGCTTGAACCTGAGAGATGGAGACTGCGGTGAGGCGAGATTGCACCACTGCACTTC  
AGCTAGGTGACAGAGTGGGACCCTGTCTCAAAACAAAACAAAACAACAACAAAAA  
AGCATGTTTTCTGTCTTTCCCTTCCT

>2565

CCACTGCACTTCAGCTAGGTGACAGAGTGGGACCCTGTCTCAAAACAAAACAAAACA  
ACAACAAAAAAGCATGTTTTCTGTCTTTCCCTTCCTCTCCTCCACCCCCTGGCATGA  
ACTCTCAACTCTTAGCCTGTGGAT

>2566

CAAAAAAAGCATGTTTTCTGTCTTTCCCTTCCTCTCCTCCACCCCCTGGCATGAACTC  
TCAACTCTTAGCCTGTGGATGTCCGTTTCTATAAATGCTGGTGCTCGGTGGTCACCGTA  
GACGTCCGAGCAGCCCCTGGGG

>2567

GCATGAACTCTCAACTCTTAGCCTGTGGATGTCCGTTTCTATAAATGCTGGTGCTCGGT  
GGTCACCGTAGACGTCCGAGCAGCCCCTGGGGCTTTGGCTTGTGTTTTCTCTGTACTTG  
TGAGGGTGGTTGCCACTTCTGG

>2568

CTCAACTCTTAGCCTGTGGATGTCCGTTTCTATAAATGCTGGTGCTCGGTGGTCACCGT  
AGACGTCCGAGCAGCCCCTGGGGCTTTGGCTTGTGTTTTCTCTGTACTTGTGAGGGTG  
GTTGCCACTTCTGGCCTTCTTTG

>2569

GCTCGGTGGTCACCGTAGACGTCCGAGCAGCCCCTGGGGCTTTGGCTTGTGTTTTCTC  
TGTAATTGTGAGGGTGGTTGCCACTTCTGGCCTTCTTTGTGCTTTCTTTTTCTTTCTTT  
CCCCAATCTTTTGTTCCTCCCT

>2570

CAATCTTTTGTTCCTCCCTCCCTCCCTCCCTCCCTTCCTCCCTTCCTTCCTTCTGCTTTCC  
TGTTTAAAGTATATGGCTGCACCTAGCATGACACAGTTCCTATTTATTCCTCAGACTTGC  
TGGGACAGTCTCCTCTGTA

>2571

CTCCCTCCCTCCCTCCCTTCCTCCCTTCCTTCCTTCTGCTTTTCCTGTTTAAAGTATATGGC  
TGCACCTAGCATGACACAGTTCCTATTTATTCCTCAGACTTGCTGGGACAGTCTCCTCT  
GTATGCGGCGACTGAGGGTG

>2572

CCCTCCCTTCCTCCCTTCCTTCCTTCTGCTTTTCCTGTTTAAAGTATATGGCTGCACCTAG  
CATGACACAGTTCCTATTTATTCCTCAGACTTGCTGGGACAGTCTCCTCTGTATGCGGC  
GACTGAGGGTGGGTTCAGTG

>2573

CCTGTTTAAAGTATATGGCTGCACCTAGCATGACACAGTTCCTATTTATTCCTCAGACTT  
GCTGGGACAGTCTCCTCTGTATGCGGCGACTGAGGGTGGGTTCAGTGCCCCAGCCCA  
CTCCCCTTCCCCTTGTTTTGT

>2574

CTAGCATGACACAGTTCCTATTTATTCCTCAGACTTGCTGGGACAGTCTCCTCTGTATGC  
GGCGACTGAGGGTGGGTTCAGTGCCCCAGCCCACTCCCCTTCCCCTTGTTTTGTCC  
ACTTGGCTGGACAAAGAGAACA



>2575

AGTTCCTATTTATTCCTCAGACTTGCTGGGACAGTCTCCTCTGTATGCGGCGACTGAGG  
GTGGGTTCAGTGCCCCAGCCCACTCCCCTTCCCCTTGTTTTGTCCACTTGCTGGAC  
AAAGAGAACAAAACCAAATGGC

>2576

ACTGAGGGTGGGTTCAGTGCCCCAGCCCACTCCCCTTCCCCTTGTTTTGTCCACTTG  
GCTGGACAAAGAGAACAAAACCAAATGGCCTCCCCTCCCCTCTCCTAAACCGGTCA  
AGCAGTGGTATTCTGGGATGATTT

>2577

TGAGGGTGGGTTCAGTGCCCCAGCCCACTCCCCTTCCCCTTGTTTTGTCCACTTGGC  
TGGACAAAGAGAACAAAACCAAATGGCCTCCCCTCCCCTCTCCTAAACCGGTCAAG  
CAGTGGTATTCTGGGATGATTTTC

>2578

TTGTCCACTTGCTGGACAAAGAGAACAAAACCAAATGGCCTCCCCTCCCCTCTCCT  
AAACCGGTCAAGCAGTGGTATTCTGGGATGATTTTCCCTGCAACCATTTAAACAAGTGC  
TTTGATGCTTACGAGTCATTGGA

>2579

TCCACTTGGCTGGACAAAGAGAACAAAACCAAATGGCCTCCCCTCCCCTCTCCTAAA  
CCGGTCAAGCAGTGGTATTCTGGGATGATTTTCCCTGCAACCATTTAAACAAGTGCTTT  
GATGCTTACGAGTCATTGGAATG

>2580

CCTCCCCTCTCCTAAACCGGTCAAGCAGTGGTATTCTGGGATGATTTTCCCTGCAACC  
ATTTAAACAAGTGCTTTGATGCTTACGAGTCATTGGAATGACCAGGCCTGTGCGCCCT  
TCTCACTGACACCCTTAGACCA

>2581

CGGTCAAGCAGTGGTATTCTGGGATGATTTTCCCTGCAACCATTTAAACAAGTGCTTTG  
ATGCTTACGAGTCATTGGAATGACCAGGCCTGTGCGCCCTTCTCACTGACACCCTTAG  
ACCAGGCTGGGCCTCACCTTT

>2582

TTCTGGGATGATTTTCCCTGCAACCATTTAAACAAGTGCTTTGATGCTTACGAGTCATTG  
GAATGACCAGGCCTGTGCGCCCTTCTCACTGACACCCTTAGACCAGGCTGGGCCTCA  
CCTTTTGTCTTGCTGCCCCTC

>2583

CAAGTGCTTTGATGCTTACGAGTCATTGGAATGACCAGGCCTGTGCGCCCTTCTCACT  
GACACCCTTAGACCAGGCTGGGCCTCACCTTTTGTCTTGCTGCCCCTCGGTGCCAG  
TGGCGTGGGCAGTAGGACTGAG

>2584

GCTTTGATGCTTACGAGTCATTGGAATGACCAGGCCTGTGCGCCCTTCTCACTGACAC  
CCTTAGACCAGGCTGGGCCTCACCTTTTGTCTTGCTGCCCCTCGGTGCCAGTGGGC  
GTGGGCAGTAGGACTGAGCAGAG

>2585

CCCCTTCTCACTGACACCCTTAGACCAGGCTGGGCCTCACCTTTTGTCTTGCTGCCCC  
TCGGTGCCAGTGGGCGTGGGCAGTAGGACTGAGCAGAGGGGCCGAGGCTGTGCTGG  
CCGGCAGCTCTGTTACAGTAGAGT

>2586

ACACCCTTAGACCAGGCTGGGCCTCACCCCTTTTGTCTTGCTGCCCCCTCGGTGCCCAGT  
GGGCGTGGGCAGTAGGACTGAGCAGAGGGGCCGAGGCTGTGCTGGCCGGCAGCTCTG  
TTACAGTAGAGTGGAAGGAGGTCCC

>2587

CCCTTAGACCAGGCTGGGCCTCACCCCTTTTGTCTTGCTGCCCCCTCGGTGCCCAGTGGG  
CGTGGGCAGTAGGACTGAGCAGAGGGGCCGAGGCTGTGCTGGCCGGCAGCTCTGTTA  
CAGTAGAGTGGAAGGAGGTCCCCGGC

>2588

AGGCTGGGCCTCACCCCTTTTGTCTTGCTGCCCCCTCGGTGCCCAGTGGGCGTGGGCAGT  
AGGACTGAGCAGAGGGGCCGAGGCTGTGCTGGCCGGCAGCTCTGTTACAGTAGAGTG  
GAAGGAGGTCCCCGGCCAGAGGGGCA

>2589

TGCCCCCTCGGTGCCCAGTGGGCGTGGGCAGTAGGACTGAGCAGAGGGGCCGAGGCTG  
TGCTGGCCGGCAGCTCTGTTACAGTAGAGTGGAAGGAGGTCCCCGGCCAGAGGGGCAG  
GTCAAACAGGCCTCTTTTATTTACAG

>2590

CAGTGGGCGTGGGCAGTAGGACTGAGCAGAGGGGCCGAGGCTGTGCTGGCCGGCAG  
CTCTGTTACAGTAGAGTGGAAGGAGGTCCCCGGCCAGAGGGGCAGGTCAAACAGGCCT  
CTTTTATTTACAGTGCTCTCTTTCACG

>2591

GTGGGCGTGGGCAGTAGGACTGAGCAGAGGGGCCGAGGCTGTGCTGGCCGGCAGCTC  
TGTTACAGTAGAGTGGAAGGAGGTCCCCGGCCAGAGGGGCAGGTCAAACAGGCCTCTT  
TTATTTACAGTGCTCTCTTTCACGGC

>2592

GTGGGCAGTAGGACTGAGCAGAGGGGCCGAGGCTGTGCTGGCCGGCAGCTCTGTTAC  
AGTAGAGTGGAAGGAGGTCCCCGGCCAGAGGGGCAGGTCAAACAGGCCTCTTTTATTT  
ACAGTGCTCTCTTTCACGGCCTCACT

>2593

TGAGCAGAGGGGCCGAGGCTGTGCTGGCCGGCAGCTCTGTTACAGTAGAGTGGAAGG  
AGGTCCCCGGCCAGAGGGGCAGGTCAAACAGGCCTCTTTTATTTACAGTGCTCTCTTTC  
ACGGCCTCACTGAAACAGGAGACCC

>2594

GCTGTGCTGGCCGGCAGCTCTGTTACAGTAGAGTGGAAGGAGGTCCCCGGCCAGAGGG  
GCAGGTCAAACAGGCCTCTTTTATTTACAGTGCTCTCTTTCACGGCCTCACTGAAACAG  
GAGACCCGAGAGGCTCCGGTGAAA

>2595

CGGCCAGAGGGGCAGGTCAAACAGGCCTCTTTTATTTACAGTGCTCTCTTTCACGGCC  
TCACTGAAACAGGAGACCCGAGAGGCTCCGGTGAAAGGGCACTGTGTTTGTGCATTTC  
AGGCCTTCCAGGGCTGGCTACAAAG

>2596

CCAGAGGGGCAGGTCAAACAGGCCTCTTTTATTTACAGTGCTCTCTTTCACGGCCTCA  
CTGAAACAGGAGACCCGAGAGGCTCCGGTGAAAGGGCACTGTGTTTGTGCATTTCAGG  
CCTTCCAGGGCTGGCTACAAAGGTG

>2597

CTTTCACGGCCTCACTGAAACAGGAGACCCGAGAGGCTCCGGTGAAAGGGCACTGTG  
TTTGTGCATTACAGGCCTTCCAGGGCTGGCTACAAAGGTGGGGGCACCCGGAGCACTGA  
AGGGGCTTTTTGTTCATTGGCAGTTT

>2598

CCTCACTGAAACAGGAGACCCGAGAGGCTCCGGTGAAAGGGCACTGTGTTTGTGCAT  
TCAGGCCTTCCAGGGCTGGCTACAAAGGTGGGGGCACCCGGAGCACTGAAGGGGCTT  
TTTGTTCATTGGCAGTTTGGCTTAGGG

>2599

CGGTGAAAGGGCACTGTGTTTGTGCATTACAGGCCTTCCAGGGCTGGCTACAAAGGTGG  
GGGCACCCGGAGCACTGAAGGGGCTTTTTGTTCATTGGCAGTTTGGCTTAGGGGAGAA  
GCGAGGGAGAGCCAGTGTGGGAGCC

>2600

GGGCACTGTGTTTGTGCATTACAGGCCTTCCAGGGCTGGCTACAAAGGTGGGGGCACCC  
GGAGCACTGAAGGGGCTTTTTGTTCATTGGCAGTTTGGCTTAGGGGAGAAGCGAGGGA  
GAGCCAGTGTGGGAGCCGCCTCTAG

>2601

CAGGCCTTCCAGGGCTGGCTACAAAGGTGGGGGCACCCGGAGCACTGAAGGGGCTTT  
TTGTTCATTGGCAGTTTGGCTTAGGGGAGAAGCGAGGGAGAGCCAGTGTGGGAGCCGC  
CTCTAGGATTGTGAGCAAGTGCCTGT

>2602

AGGGCTGGCTACAAAGGTGGGGGCACCCGGAGCACTGAAGGGGCTTTTTGTTCATTGG  
CAGTTTGGCTTAGGGGAGAAGCGAGGGAGAGCCAGTGTGGGAGCCGCCTCTAGGATT  
GTGAGCAAGTGCCTGTTTAGACAGCT

>2603

AGCACTGAAGGGGCTTTTTGTTCATTGGCAGTTTGGCTTAGGGGAGAAGCGAGGGAGA  
GCCAGTGTGGGAGCCGCCTCTAGGATTGTGAGCAAGTGCCTGTTTAGACAGCTCCACG  
CTGCTCCTTAAACCTATTTTGTGG

>2604

GGGCTTTTTGTTCATTGGCAGTTTGGCTTAGGGGAGAAGCGAGGGAGAGCCAGTGTGG  
GAGCCGCCTCTAGGATTGTGAGCAAGTGCCTGTTTAGACAGCTCCACGCTGCTCCTTA  
AAACCTATTTTGTGGTCTGGGGTTG

>2605

GTCATTGGCAGTTTGGCTTAGGGGAGAAGCGAGGGAGAGCCAGTGTGGGAGCCGCCT  
CTAGGATTGTGAGCAAGTGCCTGTTTAGACAGCTCCACGCTGCTCCTTAAACCTATTT  
TGTGGTCTGGGGTTGGGGCGGGGG

>2606

GCTTAGGGGAGAAGCGAGGGAGAGCCAGTGTGGGAGCCGCCTCTAGGATTGTGAGCA  
AGTGCCTGTTTAGACAGCTCCACGCTGCTCCTTAAACCTATTTTGTGGTCTGGGGTTG  
GGGCGGGGGCACACTGCCTCGATC

>2607

CCTTAAACCTATTTTGTGGTCTGGGGTTGGGGCGGGGGCACACTGCCTCGATCCTCTT  
GTTGTGTGGAGCAAAGTGATTCTCTCTTGTGTTCTCCAGATGGTTCCGTTGTCCT  
CACATCCATTGTGGTTGAGGAT

>2608

AAACCTATTTTGTGGTCTGGGGTTGGGGCGGGGGCACACTGCCTCGATCCTCTTGTGTGT  
GTGGAGCAAAGTGATTCTCTCTTCTGTGTTCTCCAGATGGTTCCGTTGTCCTCACAT  
CCATTGTGGTTGAGGATACAGT

>2609

GCGGGGGCACACTGCCTCGATCCTCTTGTGTGTGGAGCAAAGTGATTCTCTCTTCTT  
GTGTTCTCCAGATGGTTCCGTTGTCCTCACATCCATTGTGGTTGAGGATACAGTGCAGA  
GAAGACCCCGCTGTCCTCTGCT

>2610

GAGCAAAGTGATTCTCTCTTCTTGTGTTCTCCAGATGGTTCCGTTGTCCTCACATCCAT  
TGTGGTTGAGGATACAGTGCAGAGAAGACCCCGCTGTCCTCTGCTCCCCCTCCTTTTCT  
CTCCAAAGAGAAGTTTCAGGG

>2611

GTGATTCTCTCTTCTTGTGTTCTCCAGATGGTTCCGTTGTCCTCACATCCATTGTGGTT  
GAGGATACAGTGCAGAGAAGACCCCGCTGTCCTCTGCTCCCCCTCCTTTTCTCTCCAA  
AGAGAAGTTTCAGGGACAGCAA

>2612

TCTTCTGTGTTCTCCAGATGGTTCCGTTGTCCTCACATCCATTGTGGTTGAGGATACAG  
TGCAGAGAAGACCCCGCTGTCCTCTGCTCCCCCTCCTTTTCTCTCCAAAGAGAAGTTT  
CAGGGACAGCAATAGACTTCTG

>2613

CATTGTGGTTGAGGATACAGTGCAGAGAAGACCCCGCTGTCCTCTGCTCCCCCTCCTTT  
TCTCTCCAAAGAGAAGTTTCAGGGACAGCAATAGACTTCTGTGGGGCCTTTGTTCCTT  
GTAGCTTTTCATTTTCAATTCTT

>2614

TTGTGGTTGAGGATACAGTGCAGAGAAGACCCCGCTGTCCTCTGCTCCCCCTCCTTTTC  
TCTCCAAAGAGAAGTTTCAGGGACAGCAATAGACTTCTGTGGGGCCTTTGTTCCTTGT  
AGCTTTTCATTTTCAATTCTTCT

>2615

AGGATACAGTGCAGAGAAGACCCCGCTGTCCTCTGCTCCCCCTCCTTTTCTCTCCAAA  
GAGAAGTTTCAGGGACAGCAATAGACTTCTGTGGGGCCTTTGTTCCTTGTAGCTTTCAT  
TTTTCAATTCTTCTTCTCCCTGT

>2616

CCTCCTTTTCTCTCCAAAGAGAAGTTTCAGGGACAGCAATAGACTTCTGTGGGGCCTT  
TGTTCCTTGTAGCTTTCATTTTCAATTCTTCTTCTCCCTGTATTATCTTGCTAGGCCTTA  
GTTTGTGCATCTCTAAAATGG

>2617

CTTCTGTGGGGCCTTTGTTCCTTGTAGCTTTCATTTTCAATTCTTCTTCTCCCTGTATTA  
TCTTGCTAGGCCTTAGTTTGTGCATCTCTAAAATGGGCTGGGAGGTGCTAGCCCATACC  
TAATATATAGGGCCGTCGTA

>2618

GGGGCCTTTGTTCCTTGTAGCTTTCATTTTCAATTCTTCTTCTCCCTGTATTATCTTGCT  
AGGCCTTAGTTTGTGCATCTCTAAAATGGGCTGGGAGGTGCTAGCCCATACCTAATATAT  
AGGGCCGTCGTAAGGCTTA

>2619

TTTCAATTCTTCTTCTCCCTGTATTATCTTGCTAGGCCTTAGTTTGTGCATCTCTAAAATG  
GGCTGGGAGGTGCTAGCCCATACCTAATATATAGGGCCGTCGTAAGGCTTAGGTCCCAT  
AACTCATGGGGTTGGCTTGC

>2620

TCTTCTTCTCCCTGTATTATCTTGCTAGGCCTTAGTTTGTGCATCTCTAAAATGGGCTGG  
GAGGTGCTAGCCCATACCTAATATATAGGGCCGTCGTAAGGCTTAGGTCCCATAACTCAT  
GGGGTTGGCTTGCACAGGGC

>2621

ATCTTGCTAGGCCTTAGTTTGTGCATCTCTAAAATGGGCTGGGAGGTGCTAGCCCATAC  
CTAATATATAGGGCCGTCGTAAGGCTTAGGTCCCATAACTCATGGGGTTGGCTTGCACA  
GGGCTCTCTCCTTTCAGACTGG

>2622

TAGCCCATACCTAATATATAGGGCCGTCGTAAGGCTTAGGTCCCATAACTCATGGGGTTG  
GCTTGCACAGGGCTCTCTCCTTTCAGACTGGTCAGGCCATGGTCCTTTTATGAGTCTGA  
AGAGCCAAAATGAAGACCTCA

>2623

TATAGGGCCGTCGTAAGGCTTAGGTCCCATAACTCATGGGGTTGGCTTGCACAGGGCTC  
TCTCCTTTCAGACTGGTCAGGCCATGGTCCTTTTATGAGTCTGAAGAGCCAAAATGAA  
GACCTCACTTCTAGTATCCCCA

>2624

ATAACTCATGGGGTTGGCTTGCACAGGGCTCTCTCCTTTCAGACTGGTCAGGCCATGGT  
CCTTTTATGAGTCTGAAGAGCCAAAATGAAGACCTCACTTCTAGTATCCCCAATCTTC  
CTCCACCTTTCCTGGCTCTT

>2625

ATGGGGTTGGCTTGCACAGGGCTCTCTCCTTTCAGACTGGTCAGGCCATGGTCCTTTTA  
TGAGTCTGAAGAGCCAAAATGAAGACCTCACTTCTAGTATCCCCAATCTTCCTCCCAC  
CTTTCCTGGCTCTTGAGGGTT

>2626

GCACAGGGCTCTCTCCTTTCAGACTGGTCAGGCCATGGTCCTTTTATGAGTCTGAAGA  
GCCAAAATGAAGACCTCACTTCTAGTATCCCCAATCTTCCTCCCACCTTTCCTGGCT  
CTTGAGGGTTCTTTGGGCATGTT

>2627

GAAGAGCCAAAATGAAGACCTCACTTCTAGTATCCCCAATCTTCCTCCCACCTTTCCC  
TGGCTCTTGAGGGTTCTTTGGGCATGTTCCCCTCTGGTCTCCATTATTATATAGGGAAGA  
GAAATTTTCCAGAAGAATATT

>2628

TCCTCCCACCTTTCCTGGCTCTTGAGGGTTCTTTGGGCATGTTCCCCTCTGGTCTCCAT  
TATTATATAGGGAAGAGAAATTTCCAGAAGAATATTTGAAGGATTAAAGTTTGAGGTT  
GTAGAATATGTGAAAACACAC

>2629

CCACCTTTCCTGGCTCTTGAGGGTTCTTTGGGCATGTTCCCCTCTGGTCTCCATTATTA  
TATAGGGAAGAGAAATTTCCAGAAGAATATTTGAAGGATTAAAGTTTGAGGTTGTAGA  
ATATGTGAAAACACACACACA

>2630

GCTCTTGAGGGTTCTTTGGGCATGTTCCCCTCTGGTCTCCATTATTATATAGGGAAGAGA  
AATTTTCCAGAAGAATATTTGAAGGATTAAAGTTTGAGGTTGTAGAATATGTGAAAACA  
CACACACACCACACCACACC

>2631

TGTTCCCCTCTGGTCTCCATTATTATATAGGGAAGAGAAATTTTCCAGAAGAATATTTGA  
AGGATTAAAGTTTGAGGTTGTAGAATATGTGAAAACACACACACACCACACCACACC  
CAAAATCACCCCTTTTAAAGAAG

>2632

TCTCCATTATTATATAGGGAAGAGAAATTTTCCAGAAGAATATTTGAAGGATTAAAGTTT  
GAGGTTGTAGAATATGTGAAAACACACACACACCACACCACACCCCAAAATCACCCCTT  
TTAAAGAAGATTAAAAAACCAC

>2633

AAGTTTGAGGTTGTAGAATATGTGAAAACACACACACACCACACCACACCCCAAAATC  
ACCCTTTTAAAGAAGATTAAAAAACCACCAGTGCCTGTCCTACATTGGTAAACTCTGG  
CAAGCCTCATAATGTTGACTTTAC

>2634

TTTGAGGTTGTAGAATATGTGAAAACACACACACACCACACCACACCCCAAAATCACC  
CTTTTAAAGAAGATTAAAAAACCACCAGTGCCTGTCCTACATTGGTAAACTCTGGCAA  
GCCTCATAATGTTGACTTTACTGA

>2635

ATGTGAAAACACACACACACCACACCACACCCCAAAATCACCCCTTTTAAAGAAGATT  
AAAAACCACCAGTGCCTGTCCTACATTGGTAAACTCTGGCAAGCCTCATAATGTTGACT  
TTACTGACCTGCCTGACTTCAGT

>2636

CCAAAATCACCCCTTTTAAAGAAGATTAAAAAACCACCAGTGCCTGTCCTACATTGGTA  
AACTCTGGCAAGCCTCATAATGTTGACTTTACTGACCTGCCTGACTTCAGTGGCCGAGT  
CTACATGGGGTGTTAAGGCCCA

>2637

GTGCCTGTCCTACATTGGTAAACTCTGGCAAGCCTCATAATGTTGACTTTACTGACCTG  
CCTGACTTCAGTGGCCGAGTCTACATGGGGTGTTAAGGCCCCACGTGTTTTTGCCTGTG  
CCCTTTAATTGTATCTTCAGGA

>2638

CCTACATTGGTAAACTCTGGCAAGCCTCATAATGTTGACTTTACTGACCTGCCTGACTT  
CAGTGGCCGAGTCTACATGGGGTGTTAAGGCCCCACGTGTTTTTGCCTGTGCCCTTTAA  
TTGTATCTTCAGGACCATATTT

>2639

AGTGGCCGAGTCTACATGGGGTGTTAAGGCCCCACGTGTTTTTGCCTGTGCCCTTTAAT  
TGTATCTTCAGGACCATATTTTCAGAACAGAAATCACAGCCACAGTTTGGCAGTGGC  
ACAGAATGGTTCAATTTAGGCCT

>2640

CATGGGGTGTTAAGGCCCCACGTGTTTTTGCCTGTGCCCTTTAATTGTATCTTCAGGAC  
CATATTTTCAGAACAGAAATCACAGCCACAGTTTGGCAGTGGCACAGAATGGTTCAA  
TTTAGGCCTATCCAGAGAGGCT

>2641

GTGTTTTTGCCTGTGCCCTTTAATTGTATCTTCAGGACCATATTTTCAGAACCAGAAATC  
ACAGCCACAGTTTGGCAGTGGCACAGAATGGTTCAATTTAGGCCTATCCCAGAGAGGC  
TTGGGTTGTCTGTGAAGTTCTG

>2642

GCCTGTGCCCTTTAATTGTATCTTCAGGACCATATTTTCAGAACCAGAAATCACAGCCA  
CAGTTTGGCAGTGGCACAGAATGGTTCAATTTAGGCCTATCCCAGAGAGGCTTGGGTT  
GTCTGTGAAGTTCTGGGTGGTCT

>2643

CCTTTAATTGTATCTTCAGGACCATATTTTCAGAACCAGAAATCACAGCCACAGTTTGG  
CAGTGGCACAGAATGGTTCAATTTAGGCCTATCCCAGAGAGGCTTGGGTTGTCTGTGA  
AGTTCTGGGTGGTCTGTATTGTG

>2644

TTTTCAGAACCAGAAATCACAGCCACAGTTTGGCAGTGGCACAGAATGGTTCAATTTA  
GGCCTATCCCAGAGAGGCTTGGGTTGTCTGTGAAGTTCTGGGTGGTCTGTATTGTGGA  
GAGGTGAACACCGTATTGCTGGGG

>2645

CACAGTTTGGCAGTGGCACAGAATGGTTCAATTTAGGCCTATCCCAGAGAGGCTTGGG  
TTGTCTGTGAAGTTCTGGGTGGTCTGTATTGTGGAGAGGTGAACACCGTATTGCTGGG  
GGTGTGGAGGGGGGATGTTGCTGT

>2646

GGTTCAATTTAGGCCTATCCCAGAGAGGCTTGGGTTGTCTGTGAAGTTCTGGGTGGTCT  
GTATTGTGGAGAGGTGAACACCGTATTGCTGGGGGTGTGGAGGGGGGATGTTGCTGTT  
TCCCTGCTACAGAAAGGCCAGGC

>2647

GGGTTGTCTGTGAAGTTCTGGGTGGTCTGTATTGTGGAGAGGTGAACACCGTATTGCT  
GGGGGTGTGGAGGGGGGATGTTGCTGTTTCCCTGCTACAGAAAGGCCAGGCTTCCTTT  
TCAGCCTTTTGTTCCTCCGATTCCC

>2648

GTATTGTGGAGAGGTGAACACCGTATTGCTGGGGGTGTGGAGGGGGGATGTTGCTGTT  
TCCCTGCTACAGAAAGGCCAGGCTTCCTTTTCAGCCTTTTGTTCCTCCGATTCCCCTCTC  
TTCCTCCACTACACTCAGCCCTG

>2649

AGAGGTGAACACCGTATTGCTGGGGGTGTGGAGGGGGGATGTTGCTGTTTCCCTGCTA  
CAGAAAGGCCAGGCTTCCTTTTCAGCCTTTTGTTCCTCCGATTCCCCTCTCTTCCTCCAC  
TACACTCAGCCCTGCTGCTGCTT

>2650

TACAGAAAGGCCAGGCTTCCTTTTCAGCCTTTTGTTCCTCCGATTCCCCTCTCTTCCTCC  
ACTACACTCAGCCCTGCTGCTGCTTCCAAGGGACAACCTCCCTCTCTTGTCTTGTCCCAT  
CTTTGAGAGAGGCGGTGAATAA

>2651

CTTTTCAGCCTTTTGTTCCTCCGATTCCCCTCTCTTCCTCCACTACACTCAGCCCTGCTGC  
TGCTTCCAAGGGACAACCTCCCTCTCTTGTCTTGTCCCATCTTTGAGAGAGGCGGTGAAT  
AAACACCAAGGCAAGAAGAAG

>2652  
CTCCACTACACTCAGCCCTGCTGCTGCTTCCAAGGGACAACCTCCCTCTCTTGTCTTGC  
CCATCTTTGAGAGAGGCGGTGAATAAACACCAAGGCAAGAAGAAGCAACGGGACCCC  
TAGAAGGAGATGAGTGTGTGGCCC

>2653  
CCACTACACTCAGCCCTGCTGCTGCTTCCAAGGGACAACCTCCCTCTCTTGTCTTGGCC  
ATCTTTGAGAGAGGCGGTGAATAAACACCAAGGCAAGAAGAAGCAACGGGACCCCTA  
GAAGGAGATGAGTGTGTGGCCCAA

>2654  
TCCAAGGGACAACCTCCCTCTCTTGTCTTGGCCATCTTTGAGAGAGGCGGTGAATAAA  
CACCAAGGCAAGAAGAAGCAACGGGACCCCTAGAAGGAGATGAGTGTGTGGCCCAA  
GGATGGTGGAGCATTGTCCTGAAAGG

>2655  
AAGGGACAACCTCCCTCTCTTGTCTTGGCCATCTTTGAGAGAGGCGGTGAATAAACAC  
CAAGGCAAGAAGAAGCAACGGGACCCCTAGAAGGAGATGAGTGTGTGGCCCAAGGA  
TGGTGGAGCATTGTCCTGAAAGGTAG

>2656  
GGACAACCTCCCTCTCTTGTCTTGGCCATCTTTGAGAGAGGCGGTGAATAAACACCAA  
GGCAAGAAGAAGCAACGGGACCCCTAGAAGGAGATGAGTGTGTGGCCCAAGGATGGT  
GGAGCATTGTCCTGAAAGGTAGAAC

>2657  
TTGTCTTGGCCATCTTTGAGAGAGGCGGTGAATAAACACCAAGGCAAGAAGAAGCA  
ACGGGACCCCTAGAAGGAGATGAGTGTGTGGCCCAAGGATGGTGGAGCATTGTCCTG  
AAAGGTAGAACCAAGACTATAGCCTC

>2658  
GGCGGTGAATAAACACCAAGGCAAGAAGAAGCAACGGGACCCCTAGAAGGAGATGA  
GTGTGTGGCCCAAGGATGGTGGAGCATTGTCCTGAAAGGTAGAACCAAGACTATAGCC  
TCCGAGGCTCTGTTTACCATATTCTT

>2659  
GAAGAAGCAACGGGACCCCTAGAAGGAGATGAGTGTGTGGCCCAAGGATGGTGGAGC  
ATTGTCCTGAAAGGTAGAACCAAGACTATAGCCTCCGAGGCTCTGTTTACCATATTCTT  
GGCTCTTGTGCCACTTCTGTGTCC

>2660  
AAGCAACGGGACCCCTAGAAGGAGATGAGTGTGTGGCCCAAGGATGGTGGAGCATTG  
TCCTGAAAGGTAGAACCAAGACTATAGCCTCCGAGGCTCTGTTTACCATATTCTTGGCT  
CTTGTGCCACTTCTGTGTCCAGCA

>2661  
CTAGAAGGAGATGAGTGTGTGGCCCAAGGATGGTGGAGCATTGTCCTGAAAGGTAGA  
ACCAAGACTATAGCCTCCGAGGCTCTGTTTACCATATTCTTGGCTCTTGTGCCACTTCTG  
TGTCAGCAGCTGGAGCTTGTAG

>2662  
AGAACCAAGACTATAGCCTCCGAGGCTCTGTTTACCATATTCTTGGCTCTTGTGCCACT  
TCTGTGTCCAGCAGCTGGAGCTTGTAGAAGAAAGATGGGAAAGACATAGTACAGGAA  
ATGTTCCCATTAGCCAGCACTGA



>2663

ACCAAGACTATAGCCTCCGAGGCTCTGTTTACCATATTCTTGGCTCTTGTGCCACTTCTG  
TGTCCAGCAGCTGGAGCTTGTAGAAGAAAGATGGGAAAGACATAGTACAGGAAATGT  
TCCCATTTCAGCCAGCACTGATTT

>2664

TACCATATTCTTGGCTCTTGTGCCACTTCTGTGTCCAGCAGCTGGAGCTTGTAGAAGAA  
AGATGGGAAAGACATAGTACAGGAAATGTTCCCATTTCAGCCAGCACTGATTTATCTGCT  
GCCTGGTTTCTCAGGAGGCCTA

>2665

ATTCTTGGCTCTTGTGCCACTTCTGTGTCCAGCAGCTGGAGCTTGTAGAAGAAAGATG  
GGAAAGACATAGTACAGGAAATGTTCCCATTTCAGCCAGCACTGATTTATCTGCTGCCTG  
GTTTCTCAGGAGGCCTAATCTGT

>2666

TGGCTCTTGTGCCACTTCTGTGTCCAGCAGCTGGAGCTTGTAGAAGAAAGATGGGAAA  
GACATAGTACAGGAAATGTTCCCATTTCAGCCAGCACTGATTTATCTGCTGCCTGGTTTC  
TCAGGAGGCCTAATCTGTAAGAA

>2667

CTGTGTCCAGCAGCTGGAGCTTGTAGAAGAAAGATGGGAAAGACATAGTACAGGAAA  
TGTTCCCATTTCAGCCAGCACTGATTTATCTGCTGCCTGGTTTCTCAGGAGGCCTAATCT  
GTAAGAACAGTCGAGAACTTTATT

>2668

TGGGAAAGACATAGTACAGGAAATGTTCCCATTTCAGCCAGCACTGATTTATCTGCTGCC  
TGGTTTCTCAGGAGGCCTAATCTGTAAGAACAGTCGAGAACTTTATTTCTGCCCTTTAA  
CCTATGTCCATTTTCTAGATAG

>2669

AGGAAATGTTCCCATTTCAGCCAGCACTGATTTATCTGCTGCCTGGTTTCTCAGGAGGCC  
TAATCTGTAAGAACAGTCGAGAACTTTATTTCTGCCCTTTAACCTATGTCCATTTTCTAG  
ATAGTTTCTAAAAAAGGCATC

>2670

ATGTTCCCATTTCAGCCAGCACTGATTTATCTGCTGCCTGGTTTCTCAGGAGGCCTAATCT  
GTAAGAACAGTCGAGAACTTTATTTCTGCCCTTTAACCTATGTCCATTTTCTAGATAGTT  
TCTAAAAAAGGCATCACACC

>2671

TCAGGAGGCCTAATCTGTAAGAACAGTCGAGAACTTTATTTCTGCCCTTTAACCTATGT  
CCATTTTCTAGATAGTTTCTAAAAAAGGCATCACACCAGCTCTTTGAGACAACATGTCA  
TATGCAACTGTTGGTTTTGGGT

>2672

GAGGCCTAATCTGTAAGAACAGTCGAGAACTTTATTTCTGCCCTTTAACCTATGTCCATT  
TTCTAGATAGTTTCTAAAAAAGGCATCACACCAGCTCTTTGAGACAACATGTCATATGC  
AACTGTTGGTTTTGGGTGGAA

>2673

GTAAGAACAGTCGAGAACTTTATTTCTGCCCTTTAACCTATGTCCATTTTCTAGATAGTT  
TCTAAAAAAGGCATCACACCAGCTCTTTGAGACAACATGTCATATGCAACTGTTGGTTT  
TGGGTGGAATGAAACTGAATT

>2674

GAGAACTTTATTTCTGCCCTTTAACCTATGTCCATTTTCTAGATAGTTTCTAAAAAAGGC  
ATCACACCAGCTCTTTGAGACAACATGTCATATGCAACTGTTGGTTTTGGGTGGAATGA  
AACTGAATTGTCAACGGACAT

>2675

GGTTTTGGGTGGAATGAAACTGAATTGTCAACGGACATTTTTCTTTCTGTATTCATGTG  
TTTGGAATAGTGACAACGTCATTGGTTCAGACTTTGAGCCCCCTTCTGGTTAGGCTCTT  
CAGTATAAGCCCTTAAAAATA

>2676

TGAATTGTCAACGGACATTTTTCTTTCTGTATTCATGTGTTTGGAATAGTGACAACGTC  
ATTGGTTCAGACTTTGAGCCCCCTTCTGGTTAGGCTCTTCAGTATAAGCCCTTAAAAATA  
TTTTTGACTTTTCAGGGCCA

>2677

CTTCTGTATTCATGTGTTTGGAATAGTGACAACGTCATTGGTTCAGACTTTGAGCCCC  
CTTCTGGTTAGGCTCTTCAGTATAAGCCCTTAAAAATATTTTTGACTTTTCAGGGCCAGG  
CGCGGTGGCTCACGCCTGTAA

>2678

TTCATGTGTTTGGAATAGTGACAACGTCATTGGTTCAGACTTTGAGCCCCCTTCTGGTT  
AGGCTCTTCAGTATAAGCCCTTAAAAATATTTTTGACTTTTCAGGGCCAGGCGCGGTGG  
CTCACGCCTGTAATCCCAGCAC

>2679

TGTTTGGAATAGTGACAACGTCATTGGTTCAGACTTTGAGCCCCCTTCTGGTTAGGCTC  
TTCAGTATAAGCCCTTAAAAATATTTTTGACTTTTCAGGGCCAGGCGCGGTGGCTCACG  
CCTGTAATCCCAGCACTTTGGG

>2680

TTCAGACTTTGAGCCCCCTTCTGGTTAGGCTCTTCAGTATAAGCCCTTAAAAATATTTTT  
GACTTTTCAGGGCCAGGCGCGGTGGCTCACGCCTGTAATCCCAGCACTTTGGGAGGCC  
GAGGCAGGTGGATCACGAGGTC

>2681

CAGTATAAGCCCTTAAAAATATTTTTGACTTTTCAGGGCCAGGCGCGGTGGCTCACGCC  
TGTAATCCCAGCACTTTGGGAGGCCGAGGCAGGTGGATCACGAGGTCAGGAGATCGA  
GACCATCCTGGCTAACACGGTGAA

>2682

CTTAAAAATATTTTTGACTTTTCAGGGCCAGGCGCGGTGGCTCACGCCTGTAATCCCAG  
CACTTTGGGAGGCCGAGGCAGGTGGATCACGAGGTCAGGAGATCGAGACCATCCTGG  
CTAACACGGTGAAAGCCCGTCTCT

>2683

CAGGGCCAGGCGCGGTGGCTCACGCCTGTAATCCCAGCACTTTGGGAGGCCGAGGCA  
GGTGGATCACGAGGTCAGGAGATCGAGACCATCCTGGCTAACACGGTGAAAGCCCGT  
CTCTACTAAAAATACAAAAAATTAGC

>2684

CTTTGGGAGGCCGAGGCAGGTGGATCACGAGGTCAGGAGATCGAGACCATCCTGGCT  
AACACGGTGAAAGCCCGTCTCTACTAAAAATACAAAAAATTAGCCAGGTGTGGTGGCG  
GGCGCCTGTAGTCCCAGCTACTCGA

>2685

GGTCAGGAGATCGAGACCATCCTGGCTAACACGGTGAAAGCCCGTCTCTACTAAAAAT  
ACAAAAAATTAGCCAGGTGTGGTGGCGGGCGCCTGTAGTCCCAGCTACTCGAGAGGCT  
GAGGCTGGAGAATGGCGTGAACCC

>2686

TAACACGGTGAAAGCCCGTCTCTACTAAAAATACAAAAAATTAGCCAGGTGTGGTGGC  
GGGCGCCTGTAGTCCCAGCTACTCGAGAGGCTGAGGCTGGAGAATGGCGTGAACCCG  
GAGGCAGAGTTTGCAGTGAGCTGAG

>2687

GGTGAAAGCCCGTCTCTACTAAAAATACAAAAAATTAGCCAGGTGTGGTGGCGGGCGC  
CTGTAGTCCCAGCTACTCGAGAGGCTGAGGCTGGAGAATGGCGTGAACCCGGAGGCA  
GAGTTTGCAGTGAGCTGAGGTTGTG

>2688

ATACAAAAAATTAGCCAGGTGTGGTGGCGGGCGCCTGTAGTCCCAGCTACTCGAGAGG  
CTGAGGCTGGAGAATGGCGTGAACCCGGAGGCAGAGTTTGCAGTGAGCTGAGGTTGT  
GCCACTGCACTCCAGCCTGGGAGAC

>2689

GTGTGGTGGCGGGCGCCTGTAGTCCCAGCTACTCGAGAGGCTGAGGCTGGAGAATGG  
CGTGAACCCGGAGGCAGAGTTTGCAGTGAGCTGAGGTTGTGCCACTGCACTCCAGCC  
TGGGAGACAGAGCAAGACTCCGTCTC

>2690

GGTGGCGGGCGCCTGTAGTCCCAGCTACTCGAGAGGCTGAGGCTGGAGAATGGCGTG  
AACCCGGAGGCAGAGTTTGCAGTGAGCTGAGGTTGTGCCACTGCACTCCAGCCTGGG  
AGACAGAGCAAGACTCCGTCTCAAAA

>2691

CGCCTGTAGTCCCAGCTACTCGAGAGGCTGAGGCTGGAGAATGGCGTGAACCCGGAG  
GCAGAGTTTGCAGTGAGCTGAGGTTGTGCCACTGCACTCCAGCCTGGGAGACAGAGC  
AAGACTCCGTCTCAAAAAAATAAAAA

>2692

GAGGCTGGAGAATGGCGTGAACCCGGAGGCAGAGTTTGCAGTGAGCTGAGGTTGTGC  
CACTGCACTCCAGCCTGGGAGACAGAGCAAGACTCCGTCTCAAAAAAATAAAAAATA  
AAAAACATTAAAAAATTGACTTTTTG

>2693

TGGCGTGAACCCGGAGGCAGAGTTTGCAGTGAGCTGAGGTTGTGCCACTGCACTCCA  
GCCTGGGAGACAGAGCAAGACTCCGTCTCAAAAAAATAAAAAATAAAAAACATTAAA  
AAATTGACTTTTTGAGTAAAACAAAA

>2694

GCGTGAACCCGGAGGCAGAGTTTGCAGTGAGCTGAGGTTGTGCCACTGCACTCCAGC  
CTGGGAGACAGAGCAAGACTCCGTCTCAAAAAAATAAAAAATAAAAAACATTAAAA  
ATTGACTTTTTGAGTAAAACAAAAAC

>2695

GAACCCGGAGGCAGAGTTTGCAGTGAGCTGAGGTTGTGCCACTGCACTCCAGCCTGG  
GAGACAGAGCAAGACTCCGTCTCAAAAAAATAAAAAATAAAAAACATTAAAAAATTG  
ACTTTTTGAGTAAAACAAAAACCAA

>2696

TGGGAGACAGAGCAAGACTCCGTCTCAAAAAAATAAAAAATAAAAAACATTAAAAAA  
TTGACTTTTTTGAGTAAAACAAAAACCAAACGAGTCCGTGTAAAGTCTAAGATGTTGGT  
TCATCTCAACATTGGGATATTGGAA

>2697

CGTCTCAAAAAAATAAAAAATAAAAAACATTAAAAAATTGACTTTTTTGAGTAAAACAA  
AAACCAAACGAGTCCGTGTAAAGTCTAAGATGTTGGTTCATCTCAACATTGGGATATTG  
GAATAGGCCACTTTGGAAGGTTT

>2698

AATAAAAAATAAAAAACATTAAAAAATTGACTTTTTTGAGTAAAACAAAAACCAAACGA  
GTCCGTGTAAAGTCTAAGATGTTGGTTCATCTCAACATTGGGATATTGGAATAGGCCAC  
TTTGGAAGGTTTCTCTAATTGAT

>2699

AACAAAAACCAAACGAGTCCGTGTAAAGTCTAAGATGTTGGTTCATCTCAACATTGGG  
ATATTGGAATAGGCCACTTTGGAAGGTTTCTCTAATTGATGAAGGGCATGGGCCACCCC  
ATGGATTGCAATGCTGTGGCTGT

>2700

CGAGTCCGTGTAAAGTCTAAGATGTTGGTTCATCTCAACATTGGGATATTGGAATAGGC  
CACTTTGGAAGGTTTCTCTAATTGATGAAGGGCATGGGCCACCCCATGGATTGCAATGC  
TGTGGCTGTTTGGGTGGCATCC

>2701

AGATGTTGGTTCATCTCAACATTGGGATATTGGAATAGGCCACTTTGGAAGGTTTCTCT  
AATTGATGAAGGGCATGGGCCACCCCATGGATTGCAATGCTGTGGCTGTTTGGGTGGC  
ATCCAGCTTCTAGGGGATGGTGG

>2702

TTCTCTAATTGATGAAGGGCATGGGCCACCCCATGGATTGCAATGCTGTGGCTGTTTGG  
GTGGCATCCAGCTTCTAGGGGATGGTGGCAAACCTGGGTGTGCAGGCAGTAGGAAGG  
AGGAGGTAGCTTCCAGAGAGAGCC

>2703

ATTGATGAAGGGCATGGGCCACCCCATGGATTGCAATGCTGTGGCTGTTTGGGTGGCAT  
CCAGCTTCTAGGGGATGGTGGCAAACCTGGGTGTGCAGGCAGTAGGAAGGAGGAGGT  
AGCTTCCAGAGAGAGCCATTGCTG

>2704

GGATTGCAATGCTGTGGCTGTTTGGGTGGCATCCAGCTTCTAGGGGATGGTGGCAAAC  
TTGGGTGTGCAGGCAGTAGGAAGGAGGAGGTAGCTTCCAGAGAGAGCCATTGCTGGG  
GCTCAAGAAGTTTCTTTCTGGGCTC

>2705

TGCAATGCTGTGGCTGTTTGGGTGGCATCCAGCTTCTAGGGGATGGTGGCAAACCTGG  
GTGTGCAGGCAGTAGGAAGGAGGAGGTAGCTTCCAGAGAGAGCCATTGCTGGGGCTC  
AAGAAGTTTCTTTCTGGGCTCAAGC

>2706

TTGGGTGGCATCCAGCTTCTAGGGGATGGTGGCAAACCTGGGTGTGCAGGCAGTAGGA  
AGGAGGAGGTAGCTTCCAGAGAGAGCCATTGCTGGGGCTCAAGAAGTTTCTTTCTGG  
GCTCAAGCATGGTTGCTAGTGGTCC

>2707

GCAAACCTGGGTGTGCAGGCAGTAGGAAGGAGGAGGTAGCTTCCAGAGAGAGCCATT  
GCTGGGGCTCAAGAAGTTTCTTTCTGGGCTCAAGCATGGTTGCTAGTGGTCCACACAG  
TGCTTTCGTGTGAATTAGAAAAAGC

>2708

AACTTGGGTGTGCAGGCAGTAGGAAGGAGGAGGTAGCTTCCAGAGAGAGCCATTGCT  
GGGGCTCAAGAAGTTTCTTTCTGGGCTCAAGCATGGTTGCTAGTGGTCCACACAGTGC  
TTTCGTGTGAATTAGAAAAAGCACC

>2709

GTAGGAAGGAGGAGGTAGCTTCCAGAGAGAGCCATTGCTGGGGCTCAAGAAGTTTCT  
TTCTGGGCTCAAGCATGGTTGCTAGTGGTCCACACAGTGCCTTTCGTGTGAATTAGAAA  
AAGCACCCCTTGTTGTGGATGGATGT

>2710

GAGAGAGCCATTGCTGGGGCTCAAGAAGTTTCTTTCTGGGCTCAAGCATGGTTGCTAG  
TGGTCCACACAGTGCCTTTCGTGTGAATTAGAAAAAGCACCCCTTGTTGTGGATGGATGT  
GGCTCTTAACTAGGGTCTATCCCA

>2711

GCTCAAGAAGTTTCTTTCTGGGCTCAAGCATGGTTGCTAGTGGTCCACACAGTGCCTTC  
GTGTGAATTAGAAAAAGCACCCCTTGTTGTGGATGGATGTGGCTCTTAACTAGGGTCTAT  
CCCACAGTGAGCTGGTTGGGGC

>2712

GAAGTTTCTTTCTGGGCTCAAGCATGGTTGCTAGTGGTCCACACAGTGCCTTTCGTGTGA  
ATTAGAAAAAGCACCCCTTGTTGTGGATGGATGTGGCTCTTAACTAGGGTCTATCCCACA  
GTGAGCTGGTTGGGGCTGGATC

>2713

GGTCCACACAGTGCCTTTCGTGTGAATTAGAAAAAGCACCCCTTGTTGTGGATGGATGTG  
GCTCTTAACTAGGGTCTATCCCACAGTGAGCTGGTTGGGGCTGGATCTCAAACCTCTTT  
GCCCCTCAATCAGAGGCAGGAGG

>2714

TTTCGTGTGAATTAGAAAAAGCACCCCTTGTTGTGGATGGATGTGGCTCTTAACTAGGGT  
CTATCCCACAGTGAGCTGGTTGGGGCTGGATCTCAAACCTCTTTGCCCCTCAATCAGAG  
GCAGGAGGTCCCTGGCCCAAGG

>2715

GTGTGAATTAGAAAAAGCACCCCTTGTTGTGGATGGATGTGGCTCTTAACTAGGGTCTAT  
CCCACAGTGAGCTGGTTGGGGCTGGATCTCAAACCTCTTTGCCCCTCAATCAGAGGCA  
GGAGGTCCCTGGCCCAAGGGGCT

>2716

TCTTAACTAGGGTCTATCCCACAGTGAGCTGGTTGGGGCTGGATCTCAAACCTCTTTGC  
CCCTCAATCAGAGGCAGGAGGTCCCTGGCCCAAGGGGCTTCCATGGTTGGAGTGGTC  
GTCAGCCGAAAGCTGTTCTGGTGA

>2717

GTGAGCTGGTTGGGGCTGGATCTCAAACCTCTTTGCCCCTCAATCAGAGGCAGGAGGT  
CCCTGGCCCAAGGGGCTTCCATGGTTGGAGTGGTCGTCAGCCGAAAGCTGTTCTGGTG  
AGATGTTTTGAGCTATCAGTTCCA

>2718

GATCTCAAACCTCTTTGCCCCCTCAATCAGAGGCAGGAGGTCCCTGGCCCAAGGGGCTT  
CCATGGTTGGAGTGGTCGTCAGCCGAAAGCTGTTCTGGTGAGATGTTTTGAGCTATCA  
GTTCCAAGTTTCCAAAGGCCAAGG

>2719

CCCCTCAATCAGAGGCAGGAGGTCCCTGGCCCAAGGGGCTTCCATGGTTGGAGTGGTC  
GTCAGCCGAAAGCTGTTCTGGTGAGATGTTTTGAGCTATCAGTTCCAAGTTTCCAAAG  
GCCAAGGCCTCTGGGATCAGTTTC

>2720

GGCAGGAGGTCCCTGGCCCAAGGGGCTTCCATGGTTGGAGTGGTCGTCAGCCGAAAG  
CTGTTCTGGTGAGATGTTTTGAGCTATCAGTTCCAAGTTTCCAAAGGCCAAGGCCTCTG  
GGATCAGTTTCACTGATCCTTCAA

>2721

CCCTGGCCCAAGGGGCTTCCATGGTTGGAGTGGTCGTCAGCCGAAAGCTGTTCTGGTG  
AGATGTTTTGAGCTATCAGTTCCAAGTTTCCAAAGGCCAAGGCCTCTGGGATCAGTTTC  
ACTGATCCTTCAACCAGCTTATG

>2722

CCAAGGGGCTTCCATGGTTGGAGTGGTCGTCAGCCGAAAGCTGTTCTGGTGAGATGTT  
TTGAGCTATCAGTTCCAAGTTTCCAAAGGCCAAGGCCTCTGGGATCAGTTTCACTGATC  
CTTCAACCAGCTTATGTGCCCTG

>2723

GTTGGAGTGGTCGTCAGCCGAAAGCTGTTCTGGTGAGATGTTTTGAGCTATCAGTTCC  
AAGTTTCCAAAGGCCAAGGCCTCTGGGATCAGTTTCACTGATCCTTCAACCAGCTTATG  
TGCCCTGTTAGCCCAGATACCCC

>2724

TTTGAGCTATCAGTTCCAAGTTTCCAAAGGCCAAGGCCTCTGGGATCAGTTTCACTGAT  
CCTTCAACCAGCTTATGTGCCCTGTTAGCCCAGATACCCCTCCAGAGTGCTTCGCACTG  
GGCTGCAGGTCACTGTGGCCCC

>2725

AAGTTTCCAAAGGCCAAGGCCTCTGGGATCAGTTTCACTGATCCTTCAACCAGCTTATG  
TGCCCTGTTAGCCCAGATACCCCTCCAGAGTGCTTCGCACTGGGCTGCAGGTCACTGT  
GGCCCCACACCATAGAAGCTGGG

>2726

GGCCTCTGGGATCAGTTTCACTGATCCTTCAACCAGCTTATGTGCCCTGTTAGCCCAGA  
TACCCCTCCAGAGTGCTTCGCACTGGGCTGCAGGTCACTGTGGCCCCACACCATAGAA  
GCTGGGGGCCTGTCTGCATGTTT

>2727

GATCCTTCAACCAGCTTATGTGCCCTGTTAGCCCAGATACCCCTCCAGAGTGCTTCGCA  
CTGGGCTGCAGGTCACTGTGGCCCCACACCATAGAAGCTGGGGGCCTGTCTGCATGTT  
CTGGCATCCATAAAGCTGCCTGC

>2728

CCTGTTAGCCCAGATACCCCTCCAGAGTGCTTCGCACTGGGCTGCAGGTCACTGTGGC  
CCCACACCATAGAAGCTGGGGGCCTGTCTGCATGTTCTGGCATCCATAAAGCTGCCTGC  
AAACGTGAGAGGGGGTTTATGGC

>2729

GGCTGCAGGTCACTGTGGCCCCACACCATAGAAGCTGGGGGCCTGTCTGCATGTTCTG  
GCATCCATAAAGCTGCCTGCAAACGTGAGAGGGGGTTTATGGCACCCCTTTTAGCATGA  
CTGTCTCTTGTGACCAAGGCCAAG

>2730

GCCCCACACCATAGAAGCTGGGGGCCTGTCTGCATGTTCTGGCATCCATAAAGCTGCCT  
GCAAACGTGAGAGGGGGTTTATGGCACCCCTTTTAGCATGACTGTCTCTTGTGACCAAG  
GCCAAGAAAAATAGCACAAAGAT

>2731

CCTGTCTGCATGTTCTGGCATCCATAAAGCTGCCTGCAAACGTGAGAGGGGGTTTATGG  
CACCCCTTTTAGCATGACTGTCTCTTGTGACCAAGGCCAAGAAAAATAGCACAAAGATG  
TAGGAGTGGTGAGGAATGAAGAT

>2732

ATAAAGCTGCCTGCAAACGTGAGAGGGGGTTTATGGCACCCCTTTTAGCATGACTGTCTC  
TTGTGACCAAGGCCAAGAAAAATAGCACAAAGATGTAGGAGTGGTGAGGAATGAAGA  
TGCACGTGCACGCGCCCTGCAGTC

>2733

CTGCCTGCAAACGTGAGAGGGGGTTTATGGCACCCCTTTTAGCATGACTGTCTCTTGTGA  
CCAAGGCCAAGAAAAATAGCACAAAGATGTAGGAGTGGTGAGGAATGAAGATGCACG  
TGCACGCGCCCTGCAGTCTCAGTC

>2734

GGTTTATGGCACCCCTTTTAGCATGACTGTCTCTTGTGACCAAGGCCAAGAAAAATAGCA  
CAAAGATGTAGGAGTGGTGAGGAATGAAGATGCACGTGCACGCGCCCTGCAGTCTCA  
GTCAATGCGCTCTTTAGGGTTTAG

>2735

AGCATGACTGTCTCTTGTGACCAAGGCCAAGAAAAATAGCACAAAGATGTAGGAGTG  
GTGAGGAATGAAGATGCACGTGCACGCGCCCTGCAGTCTCAGTCAATGCGCTCTTTAG  
GGTTTAGTTTGGAAAACACAGTGT

>2736

AGGCCAAGAAAAATAGCACAAAGATGTAGGAGTGGTGAGGAATGAAGATGCACGTGC  
ACGCGCCCTGCAGTCTCAGTCAATGCGCTCTTTAGGGTTTAGTTTGGAAAACACAGT  
GTCGTGTCTTATGTAACCAATTTCT

>2737

AGAAAAATAGCACAAAGATGTAGGAGTGGTGAGGAATGAAGATGCACGTGCACGCGC  
CCTGCAGTCTCAGTCAATGCGCTCTTTAGGGTTTAGTTTGGAAAACACAGTGTCTGT  
CTTATGTAACCAATTTCTTTTCTT

>2738

AAGATGCACGTGCACGCGCCCTGCAGTCTCAGTCAATGCGCTCTTTAGGGTTTAGTTTG  
GAAAACACAGTGTCTGTCTTATGTAACCAATTTCTTTTCTTTTCTTTTCTTTTCTTTT  
TTTTTTTTTTTTTTGTGATG

>2739

CGTGTCTTATGTAACCAATTTCTTTTCTTTTCTTTTCTTTTCTTTTCTTTTCTTTTCTTTT  
TGATGGAGTCTCGTGTCTTGCTCTGTCACCCAGGCTGGAGTGCAGTGGCTCGATCTCG  
GCTCACTGCAACCTCCGCCT

>2740

TCTTTTCTTTTCTTTTCTTTTTTTTTTTTTTTTTTTGTGATGGAGTCTCGTGTCTTGCTCTG  
TCACCCAGGCTGGAGTGCAGTGGCTCGATCTCGGCTCACTGCAACCTCCGCCTCCCAG  
GTTCAAGCGACTATCCTGCC

>2741

TGTCTTGCTCTGTACCCAGGCTGGAGTGCAGTGGCTCGATCTCGGCTCACTGCAACC  
TCCGCCTCCCAGGTTCAAGCGACTATCCTGCCTCAGCCTCCTGAGTAGCTGGGACTAC  
AGGCGCCCGCCACCACGCCCAGCT

>2742

CTCTGTACCCAGGCTGGAGTGCAGTGGCTCGATCTCGGCTCACTGCAACCTCCGCCT  
CCCAGGTTCAAGCGACTATCCTGCCTCAGCCTCCTGAGTAGCTGGGACTACAGGCGCC  
CGCCACCACGCCCAGCTAATTTTT

>2743

GAGTGCAGTGGCTCGATCTCGGCTCACTGCAACCTCCGCCTCCCAGGTTCAAGCGACT  
ATCCTGCCTCAGCCTCCTGAGTAGCTGGGACTACAGGCGCCCGCCACCACGCCCAGCT  
AATTTTTTGTGTATTTAGTAGAGA

>2744

GGCTCGATCTCGGCTCACTGCAACCTCCGCCTCCCAGGTTCAAGCGACTATCCTGCCTC  
AGCCTCCTGAGTAGCTGGGACTACAGGCGCCCGCCACCACGCCCAGCTAATTTTTTGT  
GTATTTAGTAGAGACGGGGTTTC

>2745

TCGATCTCGGCTCACTGCAACCTCCGCCTCCCAGGTTCAAGCGACTATCCTGCCTCAGC  
CTCCTGAGTAGCTGGGACTACAGGCGCCCGCCACCACGCCCAGCTAATTTTTTGTGTAT  
TTAGTAGAGACGGGGTTTCACC

>2746

CACTGCAACCTCCGCCTCCCAGGTTCAAGCGACTATCCTGCCTCAGCCTCCTGAGTAG  
CTGGGACTACAGGCGCCCGCCACCACGCCCAGCTAATTTTTTGTGTATTTAGTAGAGAC  
GGGGTTTCACCGTGTTAGCCAGG

>2747

CCTCAGCCTCCTGAGTAGCTGGGACTACAGGCGCCCGCCACCACGCCCAGCTAATTTT  
TTGTGTATTTAGTAGAGACGGGGTTTCACCGTGTTAGCCAGGATGGTCACAATCTCCTG  
ACCTCGTGGTCCGCCCCGCCTTGG

>2748

CAGCCTCCTGAGTAGCTGGGACTACAGGCGCCCGCCACCACGCCCAGCTAATTTTTTG  
TGTATTTAGTAGAGACGGGGTTTCACCGTGTTAGCCAGGATGGTCACAATCTCCTGACC  
TCGTGGTCCGCCCCGCCTTGGCCT

>2749

TACAGGCGCCCGCCACCACGCCCAGCTAATTTTTTGTGTATTTAGTAGAGACGGGGTTT  
CACCGTGTTAGCCAGGATGGTCACAATCTCCTGACCTCGTGGTCCGCCCCGCCTTGGCCT  
CCCACAGTGCTGGGATTACAGG

>2750

GTTTCACCGTGTTAGCCAGGATGGTCACAATCTCCTGACCTCGTGGTCCGCCCCGCCTTG  
GCCTCCACAGTGCTGGGATTACAGGCGTGAGCCACCACGCCCCGCCACCAATTTCTT  
ATACATAGGTTATGGAGCAGGGA



>2751

GCCAGGATGGTCACAATCTCCTGACCTCGTGGTCCGCCCCGCCTTGGCCTCCCACAGTG  
CTGGGATTACAGGCGTGAGCCACCACGCCCCGGCCACCAATTTCTTATACATAGGTTATG  
GAGCAGGGAGAAAGAGACATGCA

>2752

CTTGGCCTCCCACAGTGCTGGGATTACAGGCGTGAGCCACCACGCCCCGGCCACCAATT  
TCTTATACATAGGTTATGGAGCAGGGAGAAAGAGACATGCAAACAAGGCAGAATTGGG  
ACCTTTGCAAGAAGACCTTCTTCA

>2753

CCACAGTGCTGGGATTACAGGCGTGAGCCACCACGCCCCGGCCACCAATTTCTTATACAT  
AGGTTATGGAGCAGGGAGAAAGAGACATGCAAACAAGGCAGAATTGGGACCTTTGCA  
AGAAGACCTTCTTCACTCGCCCCAC

>2754

GCCACCACGCCCCGGCCACCAATTTCTTATACATAGGTTATGGAGCAGGGAGAAAGAGA  
CATGCAAACAAGGCAGAATTGGGACCTTTGCAAGAAGACCTTCTTCACTCGCCCCACTT  
TCTCATACTTTTAGTCACCAAGGC

>2755

TTCTTATACATAGGTTATGGAGCAGGGAGAAAGAGACATGCAAACAAGGCAGAATTGG  
GACCTTTGCAAGAAGACCTTCTTCACTCGCCCCACTTTCTCATACTTTTAGTCACCAAGG  
CAGGGTCTTTTTAAACAACCTTCG

>2756

TTATACATAGGTTATGGAGCAGGGAGAAAGAGACATGCAAACAAGGCAGAATTGGGAC  
CTTTGCAAGAAGACCTTCTTCACTCGCCCCACTTTCTCATACTTTTAGTCACCAAGGCAG  
GGTCTTTTTAAACAACCTTCGAGG

>2757

TGCAAACAAGGCAGAATTGGGACCTTTGCAAGAAGACCTTCTTCACTCGCCCCACTTTC  
TCATACTTTTAGTCACCAAGGCAGGGTCTTTTTAAACAACCTTCGAGGCTCAGGCCTAGG  
GGGTTAGGAGAGTAAACCCTAAA

>2758

AGGCAGAATTGGGACCTTTGCAAGAAGACCTTCTTCACTCGCCCCACTTTCTCATACTTT  
TAGTCACCAAGGCAGGGTCTTTTTAAACAACCTTCGAGGCTCAGGCCTAGGGGGTTAGG  
AGAGTAAACCCTAAATCCCTTTC

>2759

AGAATTGGGACCTTTGCAAGAAGACCTTCTTCACTCGCCCCACTTTCTCATACTTTTAGT  
CACCAAGGCAGGGTCTTTTTAAACAACCTTCGAGGCTCAGGCCTAGGGGGTTAGGAGA  
GTAAACCCTAAATCCCTTTCACCC

>2760

GACCTTCTTCACTCGCCCCACTTTCTCATACTTTTAGTCACCAAGGCAGGGTCTTTTTAA  
ACAACCTTCGAGGCTCAGGCCTAGGGGGTTAGGAGAGTAAACCCTAAATCCCTTTCACC  
CTAGCATGCTTGGGTGCCGTGTT

>2761

TCGCCCCACTTTCTCATACTTTTAGTCACCAAGGCAGGGTCTTTTTAAACAACCTTCGAGG  
CTCAGGCCTAGGGGGTTAGGAGAGTAAACCCTAAATCCCTTTCACCCTAGCATGCTTGG  
GTGCCGTGTTGACAAGGTCTCT

>2762

CTTTTTAAACAACCTTCGAGGCTCAGGCCTAGGGGGTTAGGAGAGTAAACCCTAAATCC  
CTTTCACCCTAGCATGCTTGGGTGCCGTGTTGACAAGGTCTCTGAAGTGCCCATGGGA  
AGCAGACCAGGCTCTGAGAATAAT

>2763

GCCTAGGGGGTTAGGAGAGTAAACCCTAAATCCCTTTCACCCTAGCATGCTTGGGTGCC  
GTGTTGACAAGGTCTCTGAAGTGCCCATGGGAAGCAGACCAGGCTCTGAGAATAATTT  
CCATGGAATTAATTATTGTTCTT

>2764

CCCTAAATCCCTTTCACCCTAGCATGCTTGGGTGCCGTGTTGACAAGGTCTCTGAAGTG  
CCCATGGGAAGCAGACCAGGCTCTGAGAATAATTTCCATGGAATTAATTATTGTTCTTA  
CTCCAATAGATTTGAAATCTAT

>2765

TAAATCCCTTTCACCCTAGCATGCTTGGGTGCCGTGTTGACAAGGTCTCTGAAGTGCCC  
ATGGGAAGCAGACCAGGCTCTGAGAATAATTTCCATGGAATTAATTATTGTTCTTACTCC  
AATAGATTTGAAATCTATTTA

>2766

CCCTAGCATGCTTGGGTGCCGTGTTGACAAGGTCTCTGAAGTGCCCATGGGAAGCAGA  
CCAGGCTCTGAGAATAATTTCCATGGAATTAATTATTGTTCTTACTCCAATAGATTTGAA  
ATCTATTTAACTTTTCAGGGTC

>2767

TGCCCATGGGAAGCAGACCAGGCTCTGAGAATAATTTCCATGGAATTAATTATTGTTCTT  
ACTCCAATAGATTTGAAATCTATTTAACTTTTCAGGGTCCCCTAGCTTTTTAAATGTTTC  
AAGTGTATTCTCTCTGATAG

>2768

TGAGAATAATTTCCATGGAATTAATTATTGTTCTTACTCCAATAGATTTGAAATCTATTTA  
ACTTTTCAGGGTCCCCTAGCTTTTTTAAATGTTTCAAGTGTATTCTCTCTGATAGGTTGCC  
TTTTCTCTCCCTGTAGGCT

>2769

TTCCATGGAATTAATTATTGTTCTTACTCCAATAGATTTGAAATCTATTTAACTTTTCAGG  
GTCCCCTAGCTTTTTTAAATGTTTCAAGTGTATTCTCTCTGATAGGTTGCCTTTTCTCTCCC  
TGTAGGCTATAATTAGTG

>2770

ATTTGAAATCTATTTAACTTTTCAGGGTCCCCTAGCTTTTTTAAATGTTTCAAGTGTATTCT  
CTCTGATAGGTTGCCTTTTCTCTCCCTGTAGGCTATAATTAGTGTCTTTACACAAAATT  
GGCTTAGAATTGGATTTAG

>2771

CAGGGTCCCCTAGCTTTTTTAAATGTTTCAAGTGTATTCTCTCTGATAGGTTGCCTTTTCT  
CTCCCTGTAGGCTATAATTAGTGTCTTTACACAAAATTGGCTTAGAATTGGATTTAGAG  
AAGATAAGAATCAAATTACC

>2772

TCTCTCTGATAGGTTGCCTTTTCTCTCCCTGTAGGCTATAATTAGTGTCTTTACACAAA  
ATTGGCTTAGAATTGGATTTAGAGAAGATAAGAATCAAATTACCAGTATTTATCTTGTA  
ATTCCAAAAGATCTACTTAA

>2773

GTTGCCTTTTCTCTCCCTGTAGGCTATAATTAGTGTCTTTACACAAAATTGGCTTAGAA  
TTGGATTTAGAGAAGATAAGAATCAAATTACCAGTATTTATCTTGTAATTCCTAAAAGAT  
CTACTTAAGACACTGTATTA

>2774

TATAATTAGTGTCTTTACACAAAATTGGCTTAGAATTGGATTTAGAGAAGATAAGAATC  
AAATTACCAGTATTTATCTTGTAATTCCTAAAAGATCTACTTAAGACACTGTATTAAAAA  
AGGAGTATAAAAGAAAAGTT

>2775

ATTGGCTTAGAATTGGATTTAGAGAAGATAAGAATCAAATTACCAGTATTTATCTTGTA  
ATTCTAAAAGATCTACTTAAGACACTGTATTAAAAAAGGAGTATAAAAGAAAAGTTTAT  
TCTATGAAAAAGTAAATTCCT

>2776

ATTGGATTTAGAGAAGATAAGAATCAAATTACCAGTATTTATCTTGTAATTCCTAAAAG  
TCTACTTAAGACACTGTATTAAAAAAGGAGTATAAAAGAAAAGTTTATTCTATGAAAA  
GTAAATTCCTCATGGTCTGAG

>2777

TAAGAATCAAATTACCAGTATTTATCTTGTAATTCCTAAAAGATCTACTTAAGACACTGT  
ATTAAAAAAGGAGTATAAAAGAAAAGTTTATTCTATGAAAAAGTAAATTCCTCATGGTC  
TGAGCAACCAGGGGTATTTA

>2778

TTCTAAAAGATCTACTTAAGACACTGTATTAAAAAAGGAGTATAAAAGAAAAGTTTATT  
CTATGAAAAAGTAAATTCCTCATGGTCTGAGCAACCAGGGGTATTTAATATCAAATCTC  
CAGACTTCCCTTGGAGGCACC

>2779

AACTGTATTAAAAAAGGAGTATAAAAGAAAAGTTTATTCTATGAAAAAGTAAATTCCT  
CATGGTCTGAGCAACCAGGGGTATTTAATATCAAATCTCCAGACTTCCCTTGGAGGCA  
CTAAAATTGCCTTTTCCCTTG

>2780

GTTTATTCTATGAAAAAGTAAATTCCTCATGGTCTGAGCAACCAGGGGTATTTAATATC  
AAATCTCCAGACTTCCCTTGGAGGCACCTAAAATTGCCTTTTCCCTTGTCGCTCGTTTTT  
ATCTCCAGTTGAGCTTCTGA

>2781

AAAAGTAAATTCCTCATGGTCTGAGCAACCAGGGGTATTTAATATCAAATCTCCAGAC  
TTCCCTTGGAGGCACCTAAAATTGCCTTTTCCCTTGTCGCTCGTTTTTATCTCCAGTTGA  
GCTTCTGAAATATGTTGCCAG

>2782

TCAAATCTCCAGACTTCCCTTGGAGGCACCTAAAATTGCCTTTTCCCTTGTCGCTCGTT  
TTTATCTCCAGTTGAGCTTCTGAAATATGTTGCCAGGCTTTGGATATTGGAGAGCTGGT  
GTGGTTTCAGCTTTCATTAATA

>2783

TCTCCAGACTTCCCTTGGAGGCACCTAAAATTGCCTTTTCCCTTGTCGCTCGTTTTTATC  
TCCAGTTGAGCTTCTGAAATATGTTGCCAGGCTTTGGATATTGGAGAGCTGGTGTGGTT  
TCAGCTTTCATTAATAATTCGG

>2784

GCACCTAAAATTGCCTTTTCCCTTGTCGCTCGTTTTTATCTCCAGTTGAGCTTCTGAAAT  
ATGTTGCCAGGCTTTGGATATTGGAGAGCTGGTGTGGTTTCAGCTTTCATTAAAATTCG  
GAGGTTTTGACTTATCTATTA

>2785

TTTCCCTTGTCGCTCGTTTTTATCTCCAGTTGAGCTTCTGAAATATGTTGCCAGGCTTTG  
GATATTGGAGAGCTGGTGTGGTTTCAGCTTTCATTAAAATTCGGAGGTTTTGACTTATCT  
ATTATTTCTGATTTGTGGTA

>2786

TTTTATCTCCAGTTGAGCTTCTGAAATATGTTGCCAGGCTTTGGATATTGGAGAGCTGGT  
GTGGTTTCAGCTTTCATTAAAATTCGGAGGTTTTGACTTATCTATTATTTCTGATTTGTGG  
TAAGACATAAGCCTCTAAA

>2787

TCTGAAATATGTTGCCAGGCTTTGGATATTGGAGAGCTGGTGTGGTTTCAGCTTTCATTA  
AAATTCGGAGGTTTTGACTTATCTATTATTTCTGATTTGTGGTAAGACATAAGCCTCTAA  
AATATGCTATCTTAAAGAGA

>2788

CTGGTGTGGTTTCAGCTTTCATTAAAATTCGGAGGTTTTGACTTATCTATTATTTCTGATT  
TGTGGTAAGACATAAGCCTCTAAAATATGCTATCTTAAAGAGATACACACAAATTTTATC  
TTAGCATGTAAAGTTTTTA

>2789

GGTTTCAGCTTTCATTAAAATTCGGAGGTTTTGACTTATCTATTATTTCTGATTTGTGGTA  
AGACATAAGCCTCTAAAATATGCTATCTTAAAGAGATACACACAAATTTTATCTTAGCAT  
GTAAAGTTTTTAAGCCGTT

>2790

GAGGTTTTGACTTATCTATTATTTCTGATTTGTGGTAAGACATAAGCCTCTAAAATATGCT  
ATCTTAAAGAGATACACACAAATTTTATCTTAGCATGTAAAGTTTTTAAGCCGTTGAGAG  
ATGGCAGAATAGACCTCTG

>2791

CTGATTTGTGGTAAGACATAAGCCTCTAAAATATGCTATCTTAAAGAGATACACACAAAT  
TTTATCTTAGCATGTAAAGTTTTTAAGCCGTTGAGAGATGGCAGAATAGACCTCTGTGG  
TCTCCTGTGTGCTTCTTCGTC

>2792

GGTAAGACATAAGCCTCTAAAATATGCTATCTTAAAGAGATACACACAAATTTTATCTTA  
GCATGTAAAGTTTTTAAGCCGTTGAGAGATGGCAGAATAGACCTCTGTGGTCTCCTGTG  
TGCTTCTTCGTCCTAAAATGT

>2793

ATAAGCCTCTAAAATATGCTATCTTAAAGAGATACACACAAATTTTATCTTAGCATGTAA  
AGTTTTTAAGCCGTTGAGAGATGGCAGAATAGACCTCTGTGGTCTCCTGTGTGCTTCTT  
CGTCCTAAAATGTCAGCATGC

>2794

CTAAAATATGCTATCTTAAAGAGATACACACAAATTTTATCTTAGCATGTAAAGTTTTTA  
AGCCGTTGAGAGATGGCAGAATAGACCTCTGTGGTCTCCTGTGTGCTTCTTCGTCCTAA  
AATGTCAGCATGCTGGTTTTTC

>2795

CTTAAAGAGATACACACAAATTTTATCTTAGCATGTTAAGTTTTTAAGCCGTTGAGAGAT  
GGCAGAATAGACCTCTGTGGTCTCCTGTGTGCTTCTTCGTCCTAAAATGTCAGCATGCT  
GGTTTTTCATGTGCTGCCTCGT

>2796

TTAAGCCGTTGAGAGATGGCAGAATAGACCTCTGTGGTCTCCTGTGTGCTTCTTCGTCC  
TAAAATGTCAGCATGCTGGTTTTTCATGTGCTGCCTCGTACAGTAAGTCCCCAGCAGATT  
TAAATAAGGTTGTGTCAAAACA

>2797

CTGTGGTCTCCTGTGTGCTTCTTCGTCCTAAAATGTCAGCATGCTGGTTTTTCATGTGCTG  
CCTCGTACAGTAAGTCCCCAGCAGATTTAAATAAGGTTGTGTCAAAACATATGCCTATG  
TTTTTTTTTAACATCGTTGTCT

>2798

TCCTAAAATGTCAGCATGCTGGTTTTTCATGTGCTGCCTCGTACAGTAAGTCCCCAGCAG  
ATTAAATAAGGTTGTGTCAAAACATATGCCTATGTTTTTTTTTAACATCGTTGTCTCATAA  
GTGTGCAGTAATGGCATATT

>2799

CCCAGCAGATTTAAATAAGGTTGTGTCAAAACATATGCCTATGTTTTTTTTTAACATCGTT  
GTCTCATAAGTGTGCAGTAATGGCATATTGAGACTGTTTCATAGACTGGTCAGCTGCATT  
TCCTGCAGCCGAGGAACCCTT

>2800

GATTTAAATAAGGTTGTGTCAAAACATATGCCTATGTTTTTTTTTAACATCGTTGTCTCATA  
AGTGTGCAGTAATGGCATATTGAGACTGTTTCATAGACTGGTCAGCTGCATTTCTGCAG  
CCGAGGAACCCTTTATTAAG
