# Supplementary material for: iSS-PseDNC: Identifying Splicing Sites Using Pseudo Dinucleotide Composition
Source: Biomed Res Int. 2014 May 21;2014:623149. doi: 10.1155/2014/623149 (PMC4055483; doi:10.1155/2014/623149)
Supplement: Supplementary file 1 — Supporting Information S1. The benchmark dataset for splice donor sites. Supporting Information S2. The benchmark dataset for splice acceptor sites. [file 623149.f1.zip]

Archive with 5 entries (4 files):
- Supp1.pdf
- __MACOSX/
- __MACOSX/._Supp1.pdf
- Supp2.pdf
- __MACOSX/._Supp2.pdf
